# Supplementary material for: Nucleo-cytoplasmic shuttling of splicing factor SRSF1 is required for development and cilia function
Source: bioRxiv preprint, doi:10.1101/2020.09.04.263251, version 2 (2020-11-23)
Supplement: Supplemental Table 1, related to Figure 4 [file 263251_file02.xlsx]

## Sheet: MEF_WT_HOM p<0.05 filtered
splicing event	gene_short_name	dPSI	p.value	mean_alternative_expression_TPM
ENSMUSG00000078350;AF:4:154025621-154025857:154025867:154025621-154025909:154025966:-	Smim1	-0.955208	0.047952	0.600744
ENSMUSG00000078350;AF:4:154025621-154025857:154025867:154025621-154025909:154025936:-	Smim1	-0.756884	0.047952	0.600744
ENSMUSG00000038845;AF:11:95667000:95667042-95668037:95667064:95667139-95668037:+	Phb	0.723103	0	37.6679
ENSMUSG00000026923;AF:2:26465566-26466076:26466163:26465566-26466307:26466367:-	Notch1	-0.706059	0.001998	0.702935
ENSMUSG00000097195;AF:9:88521448-88521650:88521869:88521448-88521918:88521965:-	Snhg5	-0.61372	0.001998	2.36331
ENSMUSG00000038587;AF:10:4346841:4346966-4353142:4347768:4347907-4353142:+	Akap12	0.593638	0.0264735	0.526308
ENSMUSG00000078700;A5:11:96960281-96960861:96959615-96960861:+	D030028A08Rik	-0.538646	0.0104895	0.582551
ENSMUSG00000078700;AF:11:96944165:96944214-96944845:96944312:96944350-96944845:+	D030028A08Rik	-0.538646	0.0104895	0.582551
ENSMUSG00000031168;AF:X:8190436-8192801:8192898:8190436-8193297:8193400:-	Ebp	0.479289	0.015984	1.10114
ENSMUSG00000058388;AF:3:103968110:103968233-103969055:103968446:103968787-103969055:+	Phtf1	0.476991	0.00599401	2.44767
ENSMUSG00000032425;SE:9:88548508-88552716:88552861-88554376:+	Zfp949	-0.451859	0.00799201	0.698052
ENSMUSG00000097195;A3:9:88521716-88521918:88521448-88521918:-	Snhg5	-0.442941	0.003996	3.5861
ENSMUSG00000058388;AF:3:103968110:103968233-103969055:103968368:103968787-103969055:+	Phtf1	0.436417	0.00999001	2.44767
ENSMUSG00000066000;A5:4:147641005-147642335:147641005-147642364:-	Zfp979	-0.414118	0.00799201	0.631166
ENSMUSG00000078350;AF:4:154025621-154025857:154025867:154025621-154025909:154026230:-	Smim1	-0.406813	0.047952	0.600744
ENSMUSG00000096780;AL:17:6438524:6438843-6442204:6441402:6441478-6442204:-	Tmem181b-ps	0.406583	0.013986	1.41764
ENSMUSG00000035898;AF:5:86170617-86172407:86172511:86170617-86172668:86172739:-	Uba6	0.405986	0.044955	1.24814
ENSMUSG00000058388;AF:3:103968110:103968233-103969055:103968374:103968787-103969055:+	Phtf1	0.403391	0.0134865	2.44767
ENSMUSG00000049225;SE:4:11962233-11965614:11965648-11965884:-	Pdp1	-0.399282	0.031968	1.01484
ENSMUSG00000039361;AF:7:90130293:90130702-90160448:90131645:90131700-90160448:+	Picalm	0.396488	0.013986	11.6399
ENSMUSG00000003731;AF:4:129661439-129662400:129662479:129661439-129672409:129672528:-	Kpna6	0.385851	0.0404595	2.76334
ENSMUSG00000079056;A3:2:127465978-127510829:127465974-127510829:-	Kcnip3	0.381899	0.028971	0.958093
ENSMUSG00000031841;SE:8:118757484-118787609:118787795-118851719:+	Cdh13	-0.375028	0.0014985	1.22719
ENSMUSG00000037458;AF:15:38514609-38518097:38518162:38514609-38518909:38519227:-	Azin1	0.373005	0.023976	1.62774
ENSMUSG00000109336;AF:7:28423837-28436138:28436227:28423837-28598106:28598144:-	Samd4b	-0.370026	0.0499501	0.93272
ENSMUSG00000029059;AL:4:154895504:154895608-154897506:154897335:154897424-154897506:-	Fam213b	0.358233	0.0344655	0.777517
ENSMUSG00000029580;A3:5:142905476-142905564:142904782-142905564:-	Actb	0.34597	0.00499501	8.25592
ENSMUSG00000029319;AF:5:100663701-100673989:100674249:100663701-100674978:100675140:-	Coq2	-0.339968	0.026973	3.01021
ENSMUSG00000011958;AL:9:70003667-70004306:70004763:70003667-70007064:70007115:+	Bnip2	0.338253	0.011988	1.94169
ENSMUSG00000061232;A3:17:33996503-33996616:33996476-33996616:-	H2-K1	0.336977	0.001998	4.96666
ENSMUSG00000040187;SE:6:146796149-146802935:146803055-146805436:+	Arntl2	0.336832	0.045954	1.46162
ENSMUSG00000001472;AL:8:123400697-123401058:123401152:123400697-123403150:123403403:+	Tcf25	-0.336329	0.0481185	1.55023
ENSMUSG00000032336;AL:9:58627928-58640669:58640680:58627928-58643529:58643668:+	Nptn	-0.330336	0.035964	12.1493
ENSMUSG00000025979;SE:1:55136739-55148319:55148361-55148548:+	Mob4	0.329961	0.023976	3.15899
ENSMUSG00000036427;SE:7:34205644-34205806:34205847-34228951:-	Gpi1	0.328189	0.027972	11.7865
ENSMUSG00000035227;AF:7:99849059-99858764:99858977:99849059-99863228:99863371:-	Spcs2	0.325242	0.013986	1.04177
ENSMUSG00000078350;AF:4:154025621-154025857:154025867:154025621-154025909:154026150:-	Smim1	-0.325018	0.047952	0.600744
ENSMUSG00000087026;A5:8:85055232-85060244:85055232-85060407:-	A230103J11Rik	0.324424	0.0444555	0.684557
ENSMUSG00000021963;AF:14:57798426:57798597-57801494:57798632:57798764-57801494:+	Sap18	-0.315669	0.0254745	2.31883
ENSMUSG00000032396;AF:9:64339632-64340289:64340457:64339632-64340993:64341257:-	Dis3l	0.314629	0.0314685	2.88616
ENSMUSG00000038845;AF:11:95666957:95667042-95668037:95667064:95667139-95668037:+	Phb	0.313552	0.00224775	92.0671
ENSMUSG00000039470;AL:8:40474807-40483706:40484269:40474807-40510075:40510266:+	Zdhhc2	-0.305601	0.0314685	7.97797
ENSMUSG00000015165;AF:7:28808806:28808859-28813279:28809518:28809549-28813279:+	Hnrnpl	0.304466	0.0194805	7.9935
ENSMUSG00000040365;AF:11:48809280-48812300:48812395:48809280-48815843:48816231:-	Trim41	0.303667	0.012987	2.92382
ENSMUSG00000023036;A5:18:37817983-37825021:37815553-37825021:+	Pcdhgc4	-0.302449	0.0024975	0.669208
ENSMUSG00000098781;A5:13:67320367-67320792:67320367-67320828:-	Gm28044	-0.302098	0.0484515	0.60014
ENSMUSG00000028273;AF:3:142391850-142395515:142395578:142391850-142395586:142395607:-	Pdlim5	-0.300268	0.0374625	5.52284
ENSMUSG00000028277;AF:4:33031528:33031616-33038199:33036728:33036782-33038199:+	Ube2j1	-0.298502	0	4.56018
ENSMUSG00000028277;AL:4:33043986-33045080:33045199:33043986-33049682:33052363:+	Ube2j1	-0.298502	0	4.56018
ENSMUSG00000029713;AF:5:137529765-137529846:137529862:137529765-137533139:137533184:-	Gnb2	0.297032	0.023976	2.80749
ENSMUSG00000006395;SE:4:118360231-118360306:118360389-118361616:+	Hyi	-0.296577	0.00499501	3.67544
ENSMUSG00000030120;RI:6:124932099:124932221-124932411:124932537:+	Mlf2	-0.29521	0.023976	3.83133
ENSMUSG00000003161;AF:5:8046078:8046215-8057538:8056562:8056639-8057538:+	Sri	0.280368	0.01998	2.65672
ENSMUSG00000004771;SE:9:64725582-64726624:64726817-64737584:-	Rab11a	-0.27156	0.00549451	16.9057
ENSMUSG00000006205;AF:7:130936111:130936743-130961513:130943489:130943594-130961513:+	Htra1	-0.269459	0.023976	2.18463
ENSMUSG00000059796;AF:11:69670747-69670928:69671222:69670747-69672279:69672316:-	Eif4a1	-0.267309	0.01998	3.07767
ENSMUSG00000001021;AF:3:90586952:90586980-90601780:90600215:90600268-90601780:+	S100a3	-0.263645	0.018981	0.624837
ENSMUSG00000050043;AF:2:84678174-84678643:84678828:84678174-84679093:84679140:-	Tmx2	0.262021	0.0104895	1.77817
ENSMUSG00000006276;AL:8:72341001:72341524-72367904:72345967:72346171-72367904:-	Eps15l1	-0.259245	0.0174825	2.93807
ENSMUSG00000020439;AL:11:3517523:3517827-3521817:3520538:3520916-3521817:-	Smtn	-0.25802	0.0494505	2.15
ENSMUSG00000017376;A3:11:78567941-78568893:78567742-78568893:-	Nlk	0.257272	0.028971	1.42434
ENSMUSG00000028121;AF:3:122511129:122511322-122512351:122512222:122512265-122512351:+	Bcar3	-0.256959	0.044955	0.59985
ENSMUSG00000029580;AF:5:142905692-142905849:142905937:142905692-142906652:142906672:-	Actb	-0.256442	0.01998	17.6487
ENSMUSG00000015053;RI:6:88198334:88198401-88198674:88198881:+	Gata2	0.255264	0.00899101	2.42042
ENSMUSG00000037971;SE:9:50764926-50765031:50765166-50767858:-	1110032A03Rik	0.249317	0.0499501	1.18325
ENSMUSG00000022194;AF:14:54894155:54894494-54894848:54894618:54894669-54894848:+	Pabpn1	0.246194	0.01998	6.8706
ENSMUSG00000001472;AL:8:123400697-123401058:123401152:123400697-123403150:123403835:+	Tcf25	-0.241005	0.0481185	1.55023
ENSMUSG00000024750;AF:19:21272687:21272742-21276426:21273246:21273335-21276426:+	Zfand5	0.240929	0.0344655	1.35861
ENSMUSG00000071074;AL:17:46251227-46251364:46251488:46251227-46251566:46251904:+	Yipf3	-0.240781	0.011988	7.06043
ENSMUSG00000052419;SE:6:13870740-13871056:13871146-13871439:-	2610001J05Rik	-0.240446	0.0464535	3.14113
ENSMUSG00000028719;MX:4:114969364-114970464:114970502-114986966:114969364-114971292:114971358-114986966:-	Cmpk1	-0.239218	0.0464535	3.57271
ENSMUSG00000055436;SE:3:158022950-158023243:158023359-158024123:-	Srsf11	-0.23824	0.03996	2.80969
ENSMUSG00000004771;AF:9:64725582-64726357:64726453:64725582-64737584:64737742:-	Rab11a	-0.234959	0.010989	25.3824
ENSMUSG00000032737;AF:7:101836951-101837665:101837784:101836951-101837889:101838229:-	Inppl1	-0.229555	0.032967	5.35536
ENSMUSG00000029761;AF:6:34746386:34746639-34753443:34747773:34747969-34753443:+	Cald1	-0.229131	0.00699301	28.6577
ENSMUSG00000097195;SE:9:88521448-88521650:88521716-88521918:-	Snhg5	-0.227749	0.003996	8.41343
ENSMUSG00000101211;AF:1:71896900-71898858:71898935:71896900-71916970:71917125:-	Gm28818	-0.225975	0.048951	1.34698
ENSMUSG00000020864;AL:11:94338521-94339240:94339509:94338521-94339633:94339923:+	Ankrd40	0.224539	0.013986	4.42231
ENSMUSG00000036223;A5:18:74206884-74207530:74206884-74207594:-	Ska1	0.222647	0.045954	0.996004
ENSMUSG00000058388;AF:3:103968110:103968233-103969055:103968258:103968787-103969055:+	Phtf1	0.217162	0.00999001	2.44767
ENSMUSG00000015656;AF:9:40801276:40801348-40801918:40801461:40801620-40801918:+	Hspa8	0.215546	0.0274725	5.07298
ENSMUSG00000006057;AF:11:96075033-96075427:96075581:96075033-96075627:96075670:-	Atp5g1	0.211842	0.017982	3.94444
ENSMUSG00000030035;AF:6:83120044-83120158:83120208:83120044-83121203:83121259:-	Wbp1	-0.21163	0.0412088	4.52899
ENSMUSG00000025393;AF:10:128087681:128088533-128088957:128088552:128088572-128088957:+	Atp5b	0.210469	0.00749251	2.72391
ENSMUSG00000028936;AF:4:152325869:152325895-152327481:152327067:152327359-152327481:+	Rpl22	0.210267	0.0324675	8.6913
ENSMUSG00000021546;AF:13:58400417-58402064:58402142:58400417-58402393:58402464:-	Hnrnpk	-0.210018	0.047952	26.3656
ENSMUSG00000001248;RI:7:31134414:31134517-31135597:31135739:-	Gramd1a	0.205526	0.023976	5.89704
ENSMUSG00000051650;AF:11:22837195-22860218:22860488:22837195-22860940:22860961:-	B3gnt2	0.205421	0.041958	3.77381
ENSMUSG00000037822;AF:5:65468501-65492736:65493400:65468501-65536789:65537184:-	Smim14	-0.202554	0.03996	5.37321
ENSMUSG00000061028;AF:7:19603305-19604325:19604405:19603305-19604412:19604486:-	Clasrp	0.20124	0.0497835	2.61956
ENSMUSG00000093483;A3:11:83291833-83291967:83291833-83291974:+	AA465934	0.200504	0.02997	3.96304
ENSMUSG00000029070;A3:4:155842981-155843059:155842981-155843376:+	Mxra8	0.200305	0.011988	5.0202

## Sheet: p<0.1 no filtering
splicing event	gene_short_name	dPSI	p.value	mean_alternative_expression_TPM
ENSMUSG00000064308;A5:17:36978106-36978453:36978106-36978469:-	2410137M14Rik	-1	0	0.0150127
ENSMUSG00000022494;SE:16:12244763-12252785:12252832-12267424:+	Shisa9	1	0	0.00940033
ENSMUSG00000029586;A5:5:143181638-143192286:143181549-143192286:+	Spdye4b	-1	0	0.0068225
ENSMUSG00000073007;AF:X:107792590:107792650-107819686:107816572:107816641-107819686:+	Fam46d	0.994056	0.0509491	0.0249547
ENSMUSG00000078350;AF:4:154025621-154025857:154025867:154025621-154025909:154025966:-	Smim1	-0.955208	0.047952	0.600744
ENSMUSG00000032131;SE:9:44278130-44278972:44279114-44279303:-	Abcg4	0.885964	0.048951	0.00952358
ENSMUSG00000073007;AF:X:107792590:107792650-107819686:107816477:107816641-107819686:+	Fam46d	0.8438	0.0509491	0.0249547
ENSMUSG00000068009;SE:2:153900419-153901900:153902005-153902633:+	Bpifb6	0.789396	0.0564436	0.0293897
ENSMUSG00000100580;SE:1:83881518-83882159:83882224-83910715:-	4933436I20Rik	0.775936	0.0549451	0.0212387
ENSMUSG00000000263;A3:11:55515127-55520922:55515103-55520922:-	Glra1	0.770191	0.0939061	0.0455122
ENSMUSG00000034059;SE:2:84736965-84737064:84737107-84737420:+	Ypel4	-0.75785	0.0674326	0.0716088
ENSMUSG00000078350;AF:4:154025621-154025857:154025867:154025621-154025909:154025936:-	Smim1	-0.756884	0.047952	0.600744
ENSMUSG00000101391;SE:2:89025093-89027294:89027523-89029873:-	Olfr1217	0.753183	0.0224775	0.0605695
ENSMUSG00000029522;SE:5:115470941-115471993:115472120-115474509:+	Pla2g1b	0.734559	0.0819181	0.0310638
ENSMUSG00000038346;AF:6:125009283:125009499-125010381:125009715:125009901-125010381:+	Zfp384	-0.724611	0.0689311	1.03904
ENSMUSG00000038845;AF:11:95667000:95667042-95668037:95667064:95667139-95668037:+	Phb	0.723103	0	37.6679
ENSMUSG00000041540;AF:6:144155223-144204011:144204057:144155223-144209331:144209568:-	Sox5	-0.718636	0.0751748	0.228614
ENSMUSG00000026923;AF:2:26465566-26466076:26466163:26465566-26466307:26466367:-	Notch1	-0.706059	0.001998	0.702935
ENSMUSG00000047671;SE:4:117126858-117126982:117127088-117127276:+	Tctex1d4	0.702593	0.0529471	0.0924328
ENSMUSG00000067882;A3:17:23551181-23552007:23551180-23552007:-	Casp16-ps	-0.696586	0.0574426	0.0491722
ENSMUSG00000038346;AF:6:125009227:125009245-125010381:125009283:125009499-125010381:+	Zfp384	0.684057	0.0689311	0.135357
ENSMUSG00000069911;RI:11:34401056:34401140-34401480:34403305:+	Fam196b	-0.671033	0.0869131	0.0117625
ENSMUSG00000038346;AF:6:125009145:125009245-125010381:125009283:125009499-125010381:+	Zfp384	0.671012	0.0689311	0.297568
ENSMUSG00000021384;AF:13:49240671-49248045:49248294:49240671-49248419:49248706:-	Susd3	-0.666667	0.0524476	0.109543
ENSMUSG00000033676;AF:7:57590518:57590648-57591481:57591173:57591355-57591481:+	Gabrb3	0.666667	0.0969031	0.0873788
ENSMUSG00000057072;AF:1:191036639:191036712-191039545:191036819:191036874-191039545:+	Spata45	0.666667	0.0484515	0.0506345
ENSMUSG00000034127;A5:10:115817386-115817493:115817350-115817493:+	Tspan8	-0.666667	0.0589411	0.0504297
ENSMUSG00000024784;A3:19:6226425-6226617:6226425-6226778:+	Gpha2	-0.666667	0.0604396	0.0368628
ENSMUSG00000021384;AF:13:49240671-49242790:49242900:49240671-49248045:49248294:-	Susd3	0.666667	0.0524476	0.0276147
ENSMUSG00000029155;RI:5:73675216:73675330-73675333:73675339:+	Spata18	-0.666667	0.0944056	0.0175325
ENSMUSG00000022025;A3:14:79638177-79641896:79638174-79641896:-	Lect1	0.666667	0.0809191	0.0161857
ENSMUSG00000054757;A5:13:4511283-4512586:4511283-4512667:-	Akr1c20	0.666667	0.0879121	0.01578
ENSMUSG00000033007;SE:1:75469833-75470279:75470335-75472284:+	Asic4	-0.666667	0.0864136	0.0147275
ENSMUSG00000012777;SE:7:44254334-44254996:44255091-44255171:-	Acpt	-0.666667	0.0689311	0.0116988
ENSMUSG00000097929;AF:12:105336594:105336957-105337230:105336993:105337108-105337230:+	Tunar	0.666667	0.0694306	0.009711
ENSMUSG00000056553;A3:12:117253656-117255449:117253656-117255546:+	Ptprn2	0.666667	0.0879121	0.009202
ENSMUSG00000040950;A3:11:70134263-70135049:70134263-70135052:+	Mgl2	0.666667	0.0799201	0.007457
ENSMUSG00000073529;A5:18:77794947-77795400:77794947-77795443:-	F830208F22Rik	0.666667	0.0694306	0.00712167
ENSMUSG00000040950;A5:11:70130442-70134119:70130441-70134119:+	Mgl2	-0.666667	0.0799201	0.00687767
ENSMUSG00000029155;A5:5:73659345-73666852:73659334-73666852:+	Spata18	0.666667	0.0944056	0.00666833
ENSMUSG00000020798;SE:11:72540551-72545888:72545953-72549998:-	Spns3	0.666667	0.0809191	0.005933
ENSMUSG00000073497;AF:5:94339749:94339811-94381346:94377317:94377448-94381346:+	AA792892	-0.666667	0.0769231	0.00330367
ENSMUSG00000051980;SE:16:36497713-36500177:36500407-36509594:-	Casr	-0.666667	0.0899101	0.00228633
ENSMUSG00000090891;A3:6:87104842-87110874:87104842-87110877:+	D6Ertd527e	-0.666314	0.0739261	0.0151357
ENSMUSG00000031027;AF:7:109341639-109438579:109438817:109341639-109438917:109439081:-	Stk33	0.664985	0.035964	0.0458983
ENSMUSG00000050875;SE:18:59062562-59065835:59065885-59066910:+	A730017C20Rik	0.66436	0.0654346	0.0569177
ENSMUSG00000075270;SE:2:76113554-76136367:76136459-76137339:-	Pde11a	0.66435	0.0654346	0.0212478
ENSMUSG00000045404;A5:12:99964852-99965204:99964801-99965204:+	Kcnk13	-0.658626	0.022977	0.325177
ENSMUSG00000005493;SE:3:153901588-153904178:153904329-153904668:-	Msh4	0.658177	0.0889111	0.0245603
ENSMUSG00000101838;SE:1:53326457-53328069:53328113-53330212:-	Gm18800	0.625242	0.0724276	0.016411
ENSMUSG00000043855;RI:7:108054420:108054492-108054839:108056783:+	Olfr479	-0.622254	0.0844156	0.0161343
ENSMUSG00000049214;AL:4:111984873-111984975:111986424:111984873-111987930:111988223:+	Skint7	0.621384	0.0574426	0.0248842
ENSMUSG00000005493;AF:3:153901588-153904668:153904731:153901588-153905672:153906138:-	Msh4	-0.620102	0.0889111	0.0284765
ENSMUSG00000026621;AF:1:184807188-184808780:184808853:184807188-184810846:184811197:-	2001-03-01	-0.619883	0.0844156	0.0215863
ENSMUSG00000097195;AF:9:88521448-88521650:88521869:88521448-88521918:88521965:-	Snhg5	-0.61372	0.001998	2.36331
ENSMUSG00000047733;SE:19:6080316-6080422:6080521-6080628:+	Tmem262	0.612606	0.0464535	0.146271
ENSMUSG00000021314;A5:13:19121331-19125026:19121319-19125026:+	Amph	0.611798	0.0624376	0.0660847
ENSMUSG00000038346;AF:6:125009283:125009499-125010381:125009736:125009877-125010381:+	Zfp384	-0.60768	0.0689311	1.03904
ENSMUSG00000066861;A5:5:120879332-120881824:120879332-120881885:-	Oas1g	-0.605712	0.0794206	0.0527157
ENSMUSG00000027810;AF:3:58526043:58526086-58531087:58526303:58526437-58531087:+	Eif2a	-0.600987	0.0559441	0.874008
ENSMUSG00000049339;AF:1:75142980:75143128-75143369:75143165:75143276-75143369:+	Fam134a	-0.600944	0.0732601	0.157185
ENSMUSG00000078657;A5:3:93149497-93149609:93148596-93149609:+	Crnn	-0.600637	0.0634366	0.143459
ENSMUSG00000005672;A5:5:75639158-75640493:75639146-75640493:+	Kit	0.600121	0.0494505	0.107024
ENSMUSG00000035849;A5:11:99240621-99243862:99240621-99243943:-	Krt222	-0.598792	0.0909091	0.00772417
ENSMUSG00000038587;AF:10:4346841:4346966-4353142:4347768:4347907-4353142:+	Akap12	0.593638	0.0264735	0.526308
ENSMUSG00000016179;SE:1:193352443-193353824:193353865-193353992:-	Camk1g	0.593411	0.0749251	0.0196672
ENSMUSG00000074264;AF:3:113570057-113574604:113574762:113570057-113605572:113606699:-	Amy1	0.592409	0.0789211	0.169788
ENSMUSG00000078607;A3:11:107028268-107028363:107028268-107028366:+	1810010H24Rik	-0.582037	0.0364635	0.178673
ENSMUSG00000006269;SE:6:83749909-83751850:83751885-83752107:+	Atp6v1b1	-0.581836	0.0899101	0.016876
ENSMUSG00000038346;AF:6:125009283:125009499-125010381:125009713:125009901-125010381:+	Zfp384	-0.578473	0.0689311	1.03904
ENSMUSG00000038408;A3:13:31567613-31579570:31567610-31579570:-	1700018A04Rik	0.576856	0.0959041	0.0157907
ENSMUSG00000026227;A3:1:86046572-86048588:86046572-86048591:+	2810459M11Rik	0.576608	0.0789211	0.0194912
ENSMUSG00000010453;A3:1:36365690-36367769:36365632-36367769:-	Kansl3	0.571596	0.0584416	0.824763
ENSMUSG00000037280;A5:15:100720235-100729303:100720235-100729307:-	Galnt6	0.562974	0.0829171	0.10391
ENSMUSG00000106379;AF:5:22746059:22746625-23102412:23100552:23100649-23102412:+	Lhfpl3	-0.560714	0.0824176	0.0177607
ENSMUSG00000106379;SE:5:23102648-23221865:23221912-23273335:+	Lhfpl3	-0.560714	0.0824176	0.0177607
ENSMUSG00000031586;AF:8:33834454-33844619:33844890:33834454-33853610:33853673:-	Rbpms	-0.560626	0.0652681	0.147198
ENSMUSG00000030031;AF:6:95117740:95117974-95118523:95117984:95118098-95118523:+	Kbtbd8	0.54816	0.0674326	0.296442
ENSMUSG00000031586;AF:8:33834454-33843473:33843671:33834454-33853610:33853673:-	Rbpms	-0.548098	0.0652681	0.18026
ENSMUSG00000038346;AF:6:125009179:125009245-125010381:125009283:125009499-125010381:+	Zfp384	0.54712	0.0689311	1.45924
ENSMUSG00000034987;AL:13:54215079-54221220:54222432:54215079-54233180:54236180:+	Hrh2	-0.545033	0.0659341	0.00300567
ENSMUSG00000053461;AF:1:183418462:183418829-183423439:183419248:183419393-183423439:+	Hhipl2	0.542131	0.0789211	0.0593263
ENSMUSG00000063681;SE:1:139249075-139314571:139314753-139323227:-	Crb1	-0.541875	0.0749251	0.00418658
ENSMUSG00000078700;A5:11:96960281-96960861:96959615-96960861:+	D030028A08Rik	-0.538646	0.0104895	0.582551
ENSMUSG00000078700;AF:11:96944165:96944214-96944845:96944312:96944350-96944845:+	D030028A08Rik	-0.538646	0.0104895	0.582551
ENSMUSG00000052525;A3:17:71578393-71588583:71578393-71588586:+	Spdya	0.531677	0.0739261	0.0623215
ENSMUSG00000041540;AF:6:144155223-144204011:144204057:144155223-144209331:144209480:-	Sox5	-0.529799	0.0751748	0.228614
ENSMUSG00000034059;A3:2:84736965-84737064:84736965-84737420:+	Ypel4	-0.528657	0.0771728	0.15188
ENSMUSG00000047085;AF:7:44429018:44429116-44444875:44442485:44442531-44444875:+	Lrrc4b	0.528058	0.0934066	0.0219372
ENSMUSG00000013928;RI:7:30289533:30289727-30289730:30290237:+	Thap8	0.524811	0.0869131	0.0453467
ENSMUSG00000026969;SE:2:25221413-25221664:25221781-25222083:+	Fam166a	0.523836	0.0744256	0.0335968
ENSMUSG00000026831;AF:2:28465215-28465700:28465852:28465215-28466034:28466316:-	1700007K13Rik	-0.522699	0.0689311	0.174937
ENSMUSG00000000386;SE:16:97455228-97455489:97455643-97456222:-	Mx1	-0.522036	0.0944056	0.00646817
ENSMUSG00000040302;AL:5:3591483:3591815-3595255:3592257:3592445-3595255:-	Rbm48	0.516013	0.0899101	0.351442
ENSMUSG00000057894;A5:7:12807973-12809697:12807973-12810806:-	Zfp329	-0.513116	0.0244755	0.205135
ENSMUSG00000056155;AF:8:84173972-84176075:84176552:84173972-84185026:84185217:-	Nanos3	0.511819	0.0614386	0.201788
ENSMUSG00000027442;A3:2:148798931-148799888:148798931-148800031:+	Cst8	-0.511768	0.0904096	0.0319995
ENSMUSG00000054083;SE:7:28889256-28889781:28889838-28890156:+	Capn12	0.508392	0.0794206	0.0412973
ENSMUSG00000056155;AF:8:84173972-84176063:84176552:84173972-84185026:84185217:-	Nanos3	0.505943	0.0614386	0.132912
ENSMUSG00000025478;AF:7:139086027:139086161-139089510:139088365:139088398-139089510:+	Dpysl4	0.501228	0.0999001	0.292966
ENSMUSG00000038408;A5:13:31580153-31582437:31580153-31582464:-	1700018A04Rik	0.499598	0.0959041	0.0157907
ENSMUSG00000032425;SE:9:88548508-88552662:88552861-88554376:+	Zfp949	-0.499232	0.00799201	0.459581
ENSMUSG00000066007;AF:4:146156824:146156977-146158358:146157690:146157747-146158358:+	Zfp600	0.492829	0.0799201	0.0825262
ENSMUSG00000032845;AL:18:65265529:65266290-65276646:65274743:65274988-65276646:-	Alpk2	0.492152	0.0874126	0.0501193
ENSMUSG00000043333;AF:4:123809914:123810176-123814243:123813335:123813736-123814243:+	Rhbdl2	0.490446	0.0929071	0.267487
ENSMUSG00000006488;A3:13:27640819-27642420:27640816-27642420:-	Prl7a1	-0.489167	0.0354645	0.127287
ENSMUSG00000039913;SE:2:136269477-136333368:136333487-136387654:-	Pak7	-0.483604	0.0854146	0.06516
ENSMUSG00000037410;AF:9:90249944-90255850:90255927:90249944-90270352:90270771:-	Tbc1d2b	0.481736	0.0839161	0.395106
ENSMUSG00000005952;SE:11:73240681-73241606:73241785-73244203:+	Trpv1	-0.48157	0.0974026	0.015045
ENSMUSG00000031168;AF:X:8190436-8192801:8192898:8190436-8193297:8193400:-	Ebp	0.479289	0.015984	1.10114
ENSMUSG00000058388;AF:3:103968110:103968233-103969055:103968446:103968787-103969055:+	Phtf1	0.476991	0.00599401	2.44767
ENSMUSG00000010841;SE:11:101984378-101987947:101988017-101988446:+	1700006E09Rik	0.476646	0.0604396	0.0470062
ENSMUSG00000025478;AF:7:139086028:139086161-139089510:139088365:139088398-139089510:+	Dpysl4	0.474171	0.0999001	0.273645
ENSMUSG00000037801;SE:9:63548018-63572612:63572728-63588330:-	Iqch	0.47061	0.0939061	0.00368142
ENSMUSG00000052563;A3:11:51653871-51653992:51653871-51654011:+	D930048N14Rik	0.461365	0.0654346	0.063866
ENSMUSG00000073792;SE:4:99726947-99744490:99744625-99746326:+	Alg6	0.459966	0.0859141	0.333848
ENSMUSG00000105891;SE:3:102262879-102268109:102268279-102278913:+	A230001M10Rik	0.459891	0.0884116	0.0382375
ENSMUSG00000044041;AF:11:100120055-100120493:100120577:100120055-100121025:100121566:-	Krt13	0.458152	0.0524476	0.215228
ENSMUSG00000038260;AF:7:45304867-45304948:45305204:45304867-45305289:45305375:-	Trpm4	0.455599	0.0999001	1.09544
ENSMUSG00000046463;AF:10:37139914:37140745-37148877:37141089:37141185-37148877:+	5930403N24Rik	0.454249	0.0499501	0.139586
ENSMUSG00000028619;AF:4:107177704-107177940:107178208:107177704-107178238:107178283:-	Tceanc2	0.452151	0.0594406	0.75417
ENSMUSG00000032425;SE:9:88548508-88552716:88552861-88554376:+	Zfp949	-0.451859	0.00799201	0.698052
ENSMUSG00000085826;A3:16:45945713-45947796:45945713-45948300:+	Gm15638	-0.444317	0.0864136	0.11426
ENSMUSG00000097195;A3:9:88521716-88521918:88521448-88521918:-	Snhg5	-0.442941	0.003996	3.5861
ENSMUSG00000028619;AF:4:107177704-107178238:107178283:107177704-107178963:107179116:-	Tceanc2	-0.442931	0.0594406	1.05838
ENSMUSG00000053253;AF:14:105292289:105292365-105294799:105294546:105294690-105294799:+	Ndfip2	0.44264	0.016983	0.132938
ENSMUSG00000078700;AF:11:96944189:96944214-96944845:96944312:96944350-96944845:+	D030028A08Rik	-0.441618	0.0304695	0.103971
ENSMUSG00000043670;AF:10:81022470-81025339:81025409:81022470-81025581:81025662:-	Diras1	0.441162	0.0949051	0.102079
ENSMUSG00000021758;SE:13:112636045-112641150:112641227-112644509:-	Ddx4	-0.440464	0.0659341	0.12184
ENSMUSG00000035298;AL:7:99472930-99473196:99473604:99472930-99473707:99474022:+	Klhl35	-0.4401	0.0969031	0.0371052
ENSMUSG00000002992;AF:7:19673613-19673835:19673920:19673613-19676722:19676864:-	Apoc2	0.43925	0.0624376	0.035194
ENSMUSG00000058388;AF:3:103968110:103968233-103969055:103968368:103968787-103969055:+	Phtf1	0.436417	0.00999001	2.44767
ENSMUSG00000092341;AF:19:5795785-5796389:5796952:5795785-5797004:5797464:-	Malat1	-0.434526	0.0334665	0.469937
ENSMUSG00000108037;RI:6:125048368:125050052-125050434:125050649:+	Gm44597	0.430881	0.0689311	0.230673
ENSMUSG00000108037;A3:6:125050941-125051243:125050941-125051361:+	Gm44597	-0.430881	0.0689311	0.154499
ENSMUSG00000028797;AL:4:129602261-129602617:129602688:129602261-129607087:129607179:+	Tmem234	0.428211	0.0524476	1.85663
ENSMUSG00000074039;A5:9:114368899-114368989:114368484-114368989:+	4930520O04Rik	-0.424937	0.0919081	0.165249
ENSMUSG00000037017;A5:5:138117007-138124978:138116988-138124978:+	Zscan21	-0.421183	0.0614386	0.955398
ENSMUSG00000028646;AF:4:123917474:123917767-123919849:123919087:123919218-123919849:+	Rragc	-0.42117	0.0759241	0.677864
ENSMUSG00000066000;A5:4:147641005-147642335:147641005-147642364:-	Zfp979	-0.414118	0.00799201	0.631166
ENSMUSG00000037017;AF:5:138116937:138117007-138124978:138117041:138117920-138124978:+	Zscan21	-0.413999	0.0614386	0.955398
ENSMUSG00000085776;SE:6:50567022-50575466:50575532-50589909:+	5430402O13Rik	-0.413221	0.0719281	0.0347985
ENSMUSG00000078350;AF:4:154025621-154025857:154025867:154025621-154025909:154026230:-	Smim1	-0.406813	0.047952	0.600744
ENSMUSG00000096780;AL:17:6438524:6438843-6442204:6441402:6441478-6442204:-	Tmem181b-ps	0.406583	0.013986	1.41764
ENSMUSG00000035898;AF:5:86170617-86172407:86172511:86170617-86172668:86172739:-	Uba6	0.405986	0.044955	1.24814
ENSMUSG00000058388;AF:3:103968110:103968233-103969055:103968374:103968787-103969055:+	Phtf1	0.403391	0.0134865	2.44767
ENSMUSG00000028797;MX:4:129601243-129601407:129601625-129602195:129601243-129601870:129601961-129602195:+	Tmem234	-0.399467	0.0524476	1.45944
ENSMUSG00000049225;SE:4:11962233-11965614:11965648-11965884:-	Pdp1	-0.399282	0.031968	1.01484
ENSMUSG00000005493;A5:3:153873729-153874582:153873729-153874657:-	Msh4	-0.39822	0.0889111	0.069121
ENSMUSG00000039361;AF:7:90130293:90130702-90160448:90131645:90131700-90160448:+	Picalm	0.396488	0.013986	11.6399
ENSMUSG00000030486;AF:7:24254794:24254922-24255833:24255040:24255113-24255833:+	Zfp108	0.387282	0.0659341	0.231631
ENSMUSG00000003731;AF:4:129661439-129662400:129662479:129661439-129672409:129672528:-	Kpna6	0.385851	0.0404595	2.76334
ENSMUSG00000057388;AF:17:12915824-12915947:12916069:12915824-12916119:12916202:-	Mrpl18	0.384785	0.0659341	1.20751
ENSMUSG00000030796;AF:7:45215823:45215874-45217213:45216673:45216778-45217213:+	Tead2	0.384126	0.0681818	0.772195
ENSMUSG00000079056;A3:2:127465978-127510829:127465974-127510829:-	Kcnip3	0.381899	0.028971	0.958093
ENSMUSG00000056687;AL:11:109352835:109354268-109356740:109355182:109355239-109356740:-	Gm11696	0.378282	0.0824176	0.190275
ENSMUSG00000041431;A5:13:100779785-100780022:100779785-100780776:-	Ccnb1	0.375037	0.0194805	0.490033
ENSMUSG00000031841;SE:8:118757484-118787609:118787795-118851719:+	Cdh13	-0.375028	0.0014985	1.22719
ENSMUSG00000037458;AF:15:38514609-38518097:38518162:38514609-38518909:38519227:-	Azin1	0.373005	0.023976	1.62774
ENSMUSG00000109336;AF:7:28423837-28436138:28436227:28423837-28598106:28598144:-	Samd4b	-0.370026	0.0499501	0.93272
ENSMUSG00000030830;A5:7:127317366-127321895:127317363-127321895:+	Itgal	-0.366691	0.0864136	0.101379
ENSMUSG00000051037;SE:13:67194594-67198533:67198659-67199149:+	Zfp455	0.366257	0.0839161	0.245648
ENSMUSG00000030796;AF:7:45215810:45215832-45217213:45215848:45215906-45217213:+	Tead2	0.365261	0.0559441	2.59602
ENSMUSG00000109118;AF:7:47008083:47008446-47008724:47008545:47008593-47008724:+	Gm45109	0.364357	0.0284715	0.423181
ENSMUSG00000018362;AF:11:106997335-106998363:106998487:106997335-106999359:106999369:-	Kpna2	-0.361058	0.0599401	0.717806
ENSMUSG00000029059;AL:4:154895504:154895608-154897506:154897335:154897424-154897506:-	Fam213b	0.358233	0.0344655	0.777517
ENSMUSG00000085517;RI:4:130027967:130028155-130028276:130028346:-	Gm12963	0.357945	0.0529471	0.815572
ENSMUSG00000032060;AF:9:50751325:50751576-50753081:50751877:50751947-50753081:+	Cryab	-0.35755	0.010989	0.116112
ENSMUSG00000002679;AF:12:81591413-81593881:81593949:81591413-81594940:81595008:-	Med6	0.356666	0.0649351	0.791462
ENSMUSG00000107741;AF:3:40857856:40857956-40867429:40862165:40862760-40867429:+	Gm2011	-0.35339	0.0769231	0.0800307
ENSMUSG00000005493;SE:3:153869764-153870087:153870185-153872266:-	Msh4	0.350745	0.0889111	0.0453635
ENSMUSG00000029580;A3:5:142905476-142905564:142904782-142905564:-	Actb	0.34597	0.00499501	8.25592
ENSMUSG00000034059;RI:2:84737064:84737107-84737420:84737528:+	Ypel4	0.345887	0.0999001	0.15188
ENSMUSG00000031201;A5:X:75418465-75422779:75416841-75422779:+	Brcc3	0.343417	0.037962	0.180604
ENSMUSG00000028759;AF:4:138216627:138216799-138221526:138217268:138217294-138221526:+	Hp1bp3	-0.34282	0.0929071	0.605043
ENSMUSG00000029319;AF:5:100663701-100673989:100674249:100663701-100674978:100675140:-	Coq2	-0.339968	0.026973	3.01021
ENSMUSG00000056204;AF:8:70657480-70658778:70658912:70657480-70660301:70660388:-	Pgpep1	-0.339755	0.0624376	2.48936
ENSMUSG00000035227;SE:7:99849059-99862385:99862529-99863228:-	Spcs2	0.338675	0.014985	0.0433445
ENSMUSG00000011958;AL:9:70003667-70004306:70004763:70003667-70007064:70007115:+	Bnip2	0.338253	0.011988	1.94169
ENSMUSG00000061232;A3:17:33996503-33996616:33996476-33996616:-	H2-K1	0.336977	0.001998	4.96666
ENSMUSG00000040187;SE:6:146796149-146802935:146803055-146805436:+	Arntl2	0.336832	0.045954	1.46162
ENSMUSG00000001472;AL:8:123400697-123401058:123401152:123400697-123403150:123403403:+	Tcf25	-0.336329	0.0481185	1.55023
ENSMUSG00000049225;AF:4:11962233-11965614:11965821:11962233-11965884:11965981:-	Pdp1	-0.335987	0.0679321	0.214002
ENSMUSG00000027668;AF:3:32529539:32529560-32531898:32531545:32531586-32531898:+	Mfn1	-0.333333	0.0569431	2.12867
ENSMUSG00000034958;A3:10:81219232-81224424:81219213-81224424:-	Atcay	0.333333	0.0889111	0.0556003
ENSMUSG00000051980;AF:16:36518028-36561430:36561606:36518028-36561854:36562134:-	Casr	-0.333333	0.0899101	0.00352967
ENSMUSG00000026609;AF:1:188262023:188262063-188266971:188263034:188263509-188266971:+	Ush2a	0.333333	0.0904096	0.00174133
ENSMUSG00000068037;A3:17:12846431-12848077:12846412-12848077:-	Mas1	-0.333333	0.0944056	0.00118011
ENSMUSG00000032336;AL:9:58627928-58640669:58640680:58627928-58643529:58643668:+	Nptn	-0.330336	0.035964	12.1493
ENSMUSG00000025979;SE:1:55136739-55148319:55148361-55148548:+	Mob4	0.329961	0.023976	3.15899
ENSMUSG00000052056;AF:2:170131752-170133895:170133945:170131752-170142614:170142678:-	Zfp217	-0.328249	0.0769231	0.0162805
ENSMUSG00000104413;A3:1:171915042-171919252:171915038-171919252:-	Gm37065	0.328245	0.0764236	0.064292
ENSMUSG00000104413;A5:1:171913623-171914710:171913623-171914800:-	Gm37065	0.328245	0.0764236	0.064292
ENSMUSG00000036427;SE:7:34205644-34205806:34205847-34228951:-	Gpi1	0.328189	0.027972	11.7865
ENSMUSG00000049339;AF:1:75142794:75143128-75143369:75143165:75143276-75143369:+	Fam134a	-0.327385	0.0732601	1.34367
ENSMUSG00000003273;SE:7:45702928-45703062:45703134-45703459:+	Car11	-0.326717	0.0543207	0.968312
ENSMUSG00000015542;AF:11:115186834-115187119:115187332:115186834-115187821:115187844:-	Nat9	-0.325455	0.0944056	2.38042
ENSMUSG00000035227;AF:7:99849059-99858764:99858977:99849059-99863228:99863371:-	Spcs2	0.325242	0.013986	1.04177
ENSMUSG00000078350;AF:4:154025621-154025857:154025867:154025621-154025909:154026150:-	Smim1	-0.325018	0.047952	0.600744
ENSMUSG00000109336;SE:7:28407578-28407936:28408023-28413872:-	Samd4b	-0.324991	0.0636863	0.93272
ENSMUSG00000087026;A5:8:85055232-85060244:85055232-85060407:-	A230103J11Rik	0.324424	0.0444555	0.684557
ENSMUSG00000021608;SE:13:73467517-73488887:73489101-73494802:+	Lpcat1	0.321341	0.0804196	0.665336
ENSMUSG00000028619;AF:4:107177704-107178238:107178283:107177704-107178912:107179103:-	Tceanc2	-0.320729	0.0905761	1.05838
ENSMUSG00000049225;AF:4:11962233-11965884:11965981:11962233-11966302:11966452:-	Pdp1	0.318689	0.0679321	1.24862
ENSMUSG00000030796;A5:7:45215906-45217213:45215874-45217213:+	Tead2	-0.31752	0.0681818	1.70724
ENSMUSG00000038346;AF:6:125009283:125009499-125010381:125009805:125009901-125010381:+	Zfp384	-0.317402	0.0689311	1.03904
ENSMUSG00000021963;AF:14:57798426:57798597-57801494:57798632:57798764-57801494:+	Sap18	-0.315669	0.0254745	2.31883
ENSMUSG00000032396;AF:9:64339632-64340289:64340457:64339632-64340993:64341257:-	Dis3l	0.314629	0.0314685	2.88616
ENSMUSG00000018362;AF:11:106997335-106998746:106998779:106997335-106999359:106999369:-	Kpna2	-0.313943	0.0599401	1.68091
ENSMUSG00000034761;AF:12:69856863-69874277:69874334:69856863-69892653:69893103:-	Map4k5	-0.313762	0.0759241	0.91925
ENSMUSG00000038845;AF:11:95666957:95667042-95668037:95667064:95667139-95668037:+	Phb	0.313552	0.00224775	92.0671
ENSMUSG00000027869;SE:3:98807929-98810902:98811108-98814182:-	Hsd3b6	0.312739	0.0654346	0.720324
ENSMUSG00000057346;A5:15:77405706-77410928:77405706-77411026:-	Apol9a	-0.312464	0.0579421	0.52697
ENSMUSG00000028759;RI:4:138225889:138226052-138228648:138228787:+	Hp1bp3	0.309061	0.0929071	1.72841
ENSMUSG00000038346;AF:6:125009283:125009499-125010381:125009669:125009901-125010381:+	Zfp384	-0.308374	0.0689311	1.03904
ENSMUSG00000084085;A5:11:19009352-19010288:19009291-19010288:+	Gm16140	0.307226	0.0989011	0.11603
ENSMUSG00000054641;A3:6:60977794-60987074:60977794-60987077:+	Mmrn1	0.306972	0.0929071	0.00233417
ENSMUSG00000039470;AL:8:40474807-40483706:40484269:40474807-40510075:40510266:+	Zdhhc2	-0.305601	0.0314685	7.97797
ENSMUSG00000015165;AF:7:28808806:28808859-28813279:28809518:28809549-28813279:+	Hnrnpl	0.304466	0.0194805	7.9935
ENSMUSG00000040365;AF:11:48809280-48812300:48812395:48809280-48815843:48816231:-	Trim41	0.303667	0.012987	2.92382
ENSMUSG00000023036;A5:18:37817983-37825021:37815553-37825021:+	Pcdhgc4	-0.302449	0.0024975	0.669208
ENSMUSG00000098781;A5:13:67320367-67320792:67320367-67320828:-	Gm28044	-0.302098	0.0484515	0.60014
ENSMUSG00000056204;AF:8:70657480-70659610:70659668:70657480-70660301:70660388:-	Pgpep1	-0.301448	0.0749251	1.39676
ENSMUSG00000028273;AF:3:142391850-142395515:142395578:142391850-142395586:142395607:-	Pdlim5	-0.300268	0.0374625	5.52284
ENSMUSG00000028277;AF:4:33031528:33031616-33038199:33036728:33036782-33038199:+	Ube2j1	-0.298502	0	4.56018
ENSMUSG00000028277;AL:4:33043986-33045080:33045199:33043986-33049682:33052363:+	Ube2j1	-0.298502	0	4.56018
ENSMUSG00000049339;AF:1:75142778:75143128-75143369:75143165:75143276-75143369:+	Fam134a	-0.298316	0.0732601	1.60092
ENSMUSG00000029713;AF:5:137529765-137529846:137529862:137529765-137533139:137533184:-	Gnb2	0.297032	0.023976	2.80749
ENSMUSG00000006395;SE:4:118360231-118360306:118360389-118361616:+	Hyi	-0.296577	0.00499501	3.67544
ENSMUSG00000028797;MX:4:129601134-129601407:129601625-129602195:129601134-129601870:129601961-129602195:+	Tmem234	-0.296006	0.0524476	1.66956
ENSMUSG00000001508;A3:11:94963080-94963202:94962966-94963202:-	Sgca	-0.295612	0.0804196	0.179311
ENSMUSG00000030120;RI:6:124932099:124932221-124932411:124932537:+	Mlf2	-0.29521	0.023976	3.83133
ENSMUSG00000030553;SE:7:68239194-68259237:68259289-68264144:-	Pgpep1l	0.294288	0.0959041	0.376958
ENSMUSG00000063273;AF:3:51416296:51416376-51436215:51416614:51416774-51436215:+	Naa15	-0.293143	0.0859141	0.743635
ENSMUSG00000033594;AL:8:123229801:123230684-123235518:123232255:123234245-123235518:-	Spata2l	-0.290853	0.0969031	0.175472
ENSMUSG00000052056;AF:2:170131752-170142614:170142678:170131752-170147862:170148103:-	Zfp217	0.28815	0.0769231	0.724996
ENSMUSG00000033213;SE:2:122638133-122638257:122638342-122639216:+	AA467197	0.286083	0.0929071	0.209168
ENSMUSG00000026576;AF:1:164443350-164443606:164443719:164443350-164453489:164453777:-	Atp1b1	0.283868	0.0689311	0.633929
ENSMUSG00000031740;AF:8:92840184:92840531-92843820:92843531:92843617-92843820:+	Mmp2	-0.283259	0.0594406	0.554276
ENSMUSG00000003161;AF:5:8046078:8046215-8057538:8056562:8056639-8057538:+	Sri	0.280368	0.01998	2.65672
ENSMUSG00000022884;AF:16:23107759:23107880-23108588:23107917:23107970-23108588:+	Eif4a2	0.280195	0.0965701	1.44092
ENSMUSG00000029152;AL:5:73306753-73310274:73310416:73306753-73313443:73313941:+	Ociad1	0.278622	0.0849151	1.40862
ENSMUSG00000028797;AL:4:129602261-129602617:129602688:129602261-129607087:129607162:+	Tmem234	-0.278197	0.0923077	1.85663
ENSMUSG00000035064;AF:7:120842831:120843100-120858344:120851189:120851369-120858344:+	Eef2k	0.277953	0.0779221	2.07739
ENSMUSG00000028797;A5:4:129601625-129602195:129601533-129602195:+	Tmem234	-0.276524	0.0524476	1.5645
ENSMUSG00000059325;AF:5:77095022-77095151:77095277:77095022-77114847:77115121:-	Hopx	0.276031	0.0939061	0.373207
ENSMUSG00000056204;AF:8:70657480-70658778:70658912:70657480-70659610:70659668:-	Pgpep1	-0.275942	0.0624376	2.48936
ENSMUSG00000041817;AF:13:97067287:97067322-97091818:97071643:97071711-97091818:+	Fam169a	-0.275784	0.0944056	0.123997
ENSMUSG00000033594;AL:8:123229801:123230684-123235518:123232258:123234245-123235518:-	Spata2l	0.274667	0.0969031	0.175472
ENSMUSG00000028426;AL:4:55350427-55350898:55351184:55350427-55366777:55368574:+	Rad23b	-0.273515	0.0884116	0.472689
ENSMUSG00000063820;AL:5:77007407-77009461:77009478:77007407-77010412:77010606:+	Arl9	-0.27319	0.0689311	0.177243
ENSMUSG00000074039;SE:9:114368484-114368844:114368899-114368989:+	4930520O04Rik	-0.272269	0.0919081	0.418734
ENSMUSG00000004771;SE:9:64725582-64726624:64726817-64737584:-	Rab11a	-0.27156	0.00549451	16.9057
ENSMUSG00000006205;AF:7:130936111:130936743-130961513:130943489:130943594-130961513:+	Htra1	-0.269459	0.023976	2.18463
ENSMUSG00000059796;AF:11:69670747-69670928:69671222:69670747-69672279:69672316:-	Eif4a1	-0.267309	0.01998	3.07767
ENSMUSG00000087159;SE:X:169320697-169321755:169321833-169322750:+	Gm15246	0.266633	0.0749251	0.411579
ENSMUSG00000029427;A3:5:123710807-123714066:123710803-123714066:-	Zcchc8	-0.265472	0.0734266	2.03666
ENSMUSG00000048216;AF:6:13839179-13839418:13839495:13839179-13839642:13839942:-	Gpr85	-0.265232	0.0404595	0.462846
ENSMUSG00000003273;A5:7:45703134-45703459:45702928-45703459:+	Car11	-0.264387	0.0543207	1.22018
ENSMUSG00000040728;A5:4:11353463-11357460:11353463-11357472:-	Esrp1	-0.26399	0.0949051	0.00289333
ENSMUSG00000001021;AF:3:90586952:90586980-90601780:90600215:90600268-90601780:+	S100a3	-0.263645	0.018981	0.624837
ENSMUSG00000027646;SE:2:157424414-157424828:157424935-157455591:+	Src	0.263469	0.0905761	0.893986
ENSMUSG00000042641;SE:1:153802365-153804014:153804128-153804610:-	Rgsl1	-0.262257	0.0934066	0.00148063
ENSMUSG00000050043;AF:2:84678174-84678643:84678828:84678174-84679093:84679140:-	Tmx2	0.262021	0.0104895	1.77817
ENSMUSG00000030796;AF:7:45215810:45215832-45217213:45216673:45216778-45217213:+	Tead2	0.261133	0.0681818	2.59602
ENSMUSG00000006276;AL:8:72341001:72341524-72367904:72345967:72346171-72367904:-	Eps15l1	-0.259245	0.0174825	2.93807
ENSMUSG00000057388;AF:17:12915824-12915904:12916103:12915824-12916119:12916202:-	Mrpl18	0.259068	0.0769231	0.88338
ENSMUSG00000060063;AF:5:149264767:149265182-149272381:149265347:149265389-149272381:+	Alox5ap	-0.259041	0.0579421	0.77015
ENSMUSG00000037206;AF:9:58158230-58158427:58158545:58158230-58158962:58159221:-	Islr	-0.258572	0.0784216	0.599464
ENSMUSG00000020439;AL:11:3517523:3517827-3521817:3520538:3520916-3521817:-	Smtn	-0.25802	0.0494505	2.15
ENSMUSG00000017376;A3:11:78567941-78568893:78567742-78568893:-	Nlk	0.257272	0.028971	1.42434
ENSMUSG00000028121;AF:3:122511129:122511322-122512351:122512222:122512265-122512351:+	Bcar3	-0.256959	0.044955	0.59985
ENSMUSG00000029580;AF:5:142905692-142905849:142905937:142905692-142906652:142906672:-	Actb	-0.256442	0.01998	17.6487
ENSMUSG00000015053;RI:6:88198334:88198401-88198674:88198881:+	Gata2	0.255264	0.00899101	2.42042
ENSMUSG00000029064;AF:4:155492909:155493044-155527413:155522636:155522658-155527413:+	Gnb1	-0.255053	0.0745921	1.2976
ENSMUSG00000006800;AF:2:166132854-166154345:166154423:166132854-166155503:166155605:-	Sulf2	0.252472	0.0899101	0.567625
ENSMUSG00000043510;SE:5:110830983-110834655:110834799-110835975:-	Hscb	-0.25129	0.0719281	1.50828
ENSMUSG00000037971;SE:9:50764926-50765031:50765166-50767858:-	1110032A03Rik	0.249317	0.0499501	1.18325
ENSMUSG00000003380;AF:7:24971858-24972003:24972026:24971858-24972102:24972638:-	Rabac1	-0.247196	0.0779221	2.62633
ENSMUSG00000022194;AF:14:54894155:54894494-54894848:54894618:54894669-54894848:+	Pabpn1	0.246194	0.01998	6.8706
ENSMUSG00000030357;AF:6:128436714-128437610:128437653:128436714-128438068:128438140:-	Fkbp4	0.242837	0.0579421	3.84301
ENSMUSG00000022884;AF:16:23107771:23107880-23108588:23107917:23107970-23108588:+	Eif4a2	-0.241618	0.0965701	0.625632
ENSMUSG00000001472;AL:8:123400697-123401058:123401152:123400697-123403150:123403835:+	Tcf25	-0.241005	0.0481185	1.55023
ENSMUSG00000024750;AF:19:21272687:21272742-21276426:21273246:21273335-21276426:+	Zfand5	0.240929	0.0344655	1.35861
ENSMUSG00000071074;AL:17:46251227-46251364:46251488:46251227-46251566:46251904:+	Yipf3	-0.240781	0.011988	7.06043
ENSMUSG00000052419;SE:6:13870740-13871056:13871146-13871439:-	2610001J05Rik	-0.240446	0.0464535	3.14113
ENSMUSG00000031565;AF:8:25518759:25519429-25532250:25532125:25532161-25532250:+	Fgfr1	0.239416	0.0917083	4.63945
ENSMUSG00000028719;MX:4:114969364-114970464:114970502-114986966:114969364-114971292:114971358-114986966:-	Cmpk1	-0.239218	0.0464535	3.57271
ENSMUSG00000055436;SE:3:158022950-158023243:158023359-158024123:-	Srsf11	-0.23824	0.03996	2.80969
ENSMUSG00000039953;AF:4:149586638:149586772-149614050:149587248:149587338-149614050:+	Clstn1	-0.237616	0.0569431	2.87974
ENSMUSG00000026761;AL:2:48929626:48929729-48933080:48931958:48932597-48933080:-	Orc4	-0.236964	0.0849151	0.749972
ENSMUSG00000004771;AF:9:64725582-64726357:64726453:64725582-64737584:64737742:-	Rab11a	-0.234959	0.010989	25.3824
ENSMUSG00000003273;RI:7:45702833:45702928-45703062:45703134:+	Car11	0.234844	0.0543207	1.22018
ENSMUSG00000031565;AF:8:25518772:25519429-25532250:25532125:25532161-25532250:+	Fgfr1	0.233864	0.0917083	0.396273
ENSMUSG00000029524;AF:5:115483118-115484053:115484297:115483118-115484332:115484366:-	Sirt4	-0.230437	0.0786713	0.309157
ENSMUSG00000032737;AF:7:101836951-101837665:101837784:101836951-101837889:101838229:-	Inppl1	-0.229555	0.032967	5.35536
ENSMUSG00000029761;AF:6:34746386:34746639-34753443:34747773:34747969-34753443:+	Cald1	-0.229131	0.00699301	28.6577
ENSMUSG00000028759;AF:4:138216626:138216740-138221526:138217268:138217294-138221526:+	Hp1bp3	-0.227775	0.0929071	2.43513
ENSMUSG00000097195;SE:9:88521448-88521650:88521716-88521918:-	Snhg5	-0.227749	0.003996	8.41343
ENSMUSG00000060279;AF:7:44916470-44928530:44928643:44916470-44929280:44929462:-	Ap2a1	0.226761	0.0759241	0.401564
ENSMUSG00000042099;A5:17:33816263-33817194:33816245-33817194:+	Kank3	0.226151	0.0519481	0.663452
ENSMUSG00000101211;AF:1:71896900-71898858:71898935:71896900-71916970:71917125:-	Gm28818	-0.225975	0.048951	1.34698
ENSMUSG00000002679;AF:12:81591413-81593881:81593949:81591413-81594940:81594958:-	Med6	-0.225398	0.0649351	0.791462
ENSMUSG00000049526;SE:9:59524964-59525075:59525267-59525365:-	Tmem202	0.224953	0.0864136	0.443488
ENSMUSG00000020864;AL:11:94338521-94339240:94339509:94338521-94339633:94339923:+	Ankrd40	0.224539	0.013986	4.42231
ENSMUSG00000036223;A5:18:74206884-74207530:74206884-74207594:-	Ska1	0.222647	0.045954	0.996004
ENSMUSG00000030104;AF:6:108828641:108829233-108836740:108836410:108836468-108836740:+	Edem1	0.219995	0.0614386	2.19101
ENSMUSG00000066839;SE:9:22076645-22078148:22078265-22085349:-	Ecsit	-0.217484	0.0614386	1.22998
ENSMUSG00000023286;AF:4:155943850:155944150-155946255:155944158:155944259-155946255:+	Ube2j2	-0.217252	0.0786713	1.15375
ENSMUSG00000058388;AF:3:103968110:103968233-103969055:103968258:103968787-103969055:+	Phtf1	0.217162	0.00999001	2.44767
ENSMUSG00000042662;SE:2:152949120-152950621:152950654-152951335:-	Dusp15	0.21676	0.0509491	0.514388
ENSMUSG00000020831;SE:11:70236211-70236877:70236978-70237531:-	0610010K14Rik	-0.216329	0.0624376	2.23634
ENSMUSG00000015656;AF:9:40801276:40801348-40801918:40801461:40801620-40801918:+	Hspa8	0.215546	0.0274725	5.07298
ENSMUSG00000033460;SE:X:134718050-134718726:134718818-134718920:+	Armcx1	-0.212594	0.0582751	3.69914
ENSMUSG00000006057;AF:11:96075033-96075427:96075581:96075033-96075627:96075670:-	Atp5g1	0.211842	0.017982	3.94444
ENSMUSG00000030035;AF:6:83120044-83120158:83120208:83120044-83121203:83121259:-	Wbp1	-0.21163	0.0412088	4.52899
ENSMUSG00000029524;AF:5:115483118-115484053:115484297:115483118-115484332:115484725:-	Sirt4	-0.211605	0.0786713	0.309157
ENSMUSG00000029106;SE:5:34629172-34630235:34630284-34630470:+	Add1	0.210682	0.0584416	2.12394
ENSMUSG00000025393;AF:10:128087681:128088533-128088957:128088552:128088572-128088957:+	Atp5b	0.210469	0.00749251	2.72391
ENSMUSG00000028936;AF:4:152325869:152325895-152327481:152327067:152327359-152327481:+	Rpl22	0.210267	0.0324675	8.6913
ENSMUSG00000021546;AF:13:58400417-58402064:58402142:58400417-58402393:58402464:-	Hnrnpk	-0.210018	0.047952	26.3656
ENSMUSG00000038497;AF:8:13310215:13310340-13313806:13313185:13313540-13313806:+	Tmco3	-0.208272	0.0619381	3.53615
ENSMUSG00000031848;SE:8:70676596-70677778:70677858-70677954:+	Lsm4	-0.207305	0.0649351	2.69282
ENSMUSG00000096981;SE:9:22071164-22076020:22076083-22076250:+	Gm16845	-0.20671	0.0759241	0.318954
ENSMUSG00000032366;AL:9:67022593:67023441-67031029:67024324:67024565-67031029:-	Tpm1	-0.205947	0.0832501	5.84476
ENSMUSG00000001248;RI:7:31134414:31134517-31135597:31135739:-	Gramd1a	0.205526	0.023976	5.89704
ENSMUSG00000051650;AF:11:22837195-22860218:22860488:22837195-22860940:22860961:-	B3gnt2	0.205421	0.041958	3.77381
ENSMUSG00000044501;A3:17:22361707-22371991:22361707-22372036:+	Zfp758	0.204171	0.0996503	0.794572
ENSMUSG00000030846;A3:7:128447107-128448121:128446798-128448121:-	Tial1	-0.203002	0.0899101	1.66838
ENSMUSG00000037822;AF:5:65468501-65492736:65493400:65468501-65536789:65537184:-	Smim14	-0.202554	0.03996	5.37321
ENSMUSG00000035284;SE:9:67982619-67983323:67983406-67987963:+	Vps13c	0.201556	0.0529471	0.618083
ENSMUSG00000061028;AF:7:19603305-19604325:19604405:19603305-19604412:19604486:-	Clasrp	0.20124	0.0497835	2.61956
ENSMUSG00000093483;A3:11:83291833-83291967:83291833-83291974:+	AA465934	0.200504	0.02997	3.96304
ENSMUSG00000029070;A3:4:155842981-155843059:155842981-155843376:+	Mxra8	0.200305	0.011988	5.0202
ENSMUSG00000022194;AF:14:54892500:54892738-54894848:54894618:54894669-54894848:+	Pabpn1	0.199127	0.0839161	1.77296
ENSMUSG00000050821;A3:16:20693472-20698865:20693472-20698922:+	Fam131a	-0.198218	0.0979021	1.48353
ENSMUSG00000054057;AF:2:18028238-18028711:18028760:18028238-18037567:18037737:-	A930004D18Rik	-0.198194	0.0829171	0.366472
ENSMUSG00000019087;RI:X:74300578:74300771-74301324:74301358:+	Atp6ap1	0.197796	0.0454545	4.78364
ENSMUSG00000078937;A3:15:89420008-89420088:89419962-89420088:-	Cpt1b	-0.196677	0.0999001	0.879273
ENSMUSG00000037822;AF:5:65468501-65492736:65492881:65468501-65536789:65537184:-	Smim14	-0.196058	0.02997	6.22997
ENSMUSG00000086224;SE:3:5179041-5202638:5202737-5220670:-	2700069I18Rik	-0.195891	0.0619381	0.536519
ENSMUSG00000054150;SE:12:104968191-104969201:104969373-104975738:-	Syne3	0.194601	0.0744256	0.996218
ENSMUSG00000006435;AF:19:47178820:47179551-47239802:47228843:47229096-47239802:+	Neurl1a	0.19457	0.0494505	1.49069
ENSMUSG00000002059;AF:11:78188440:78188511-78189571:78188922:78189390-78189571:+	Rab34	0.194541	0.041958	5.76108
ENSMUSG00000004996;SE:8:84254352-84256308:84256419-84256890:-	Mri1	-0.19391	0.0734266	4.03645
ENSMUSG00000028741;AF:4:139349087-139349519:139349603:139349087-139349614:139349621:-	Mrto4	0.19279	0.0914086	1.22162
ENSMUSG00000039988;RI:3:157947414:157947431-157947476:157947956:+	Ankrd13c	0.19175	0.02997	17.0179
ENSMUSG00000026034;RI:1:58419667:58419733-58421083:58421308:-	Clk1	0.191378	0.044955	2.17669
ENSMUSG00000008683;AF:7:118115246-118116097:118116128:118115246-118116136:118116188:-	Rps15a	0.190988	0.014985	234.273
ENSMUSG00000027646;AF:2:157418444:157418512-157439201:157424293:157424414-157439201:+	Src	-0.190439	0.0905761	4.08296
ENSMUSG00000085385;A5:2:158359432-158360464:158359432-158360527:-	Snhg17	0.189119	0.0815851	3.33052
ENSMUSG00000025505;SE:7:141328266-141331418:141331561-141332910:+	Tmem80	0.188906	0.044955	1.53325
ENSMUSG00000037971;SE:9:50764290-50764765:50764926-50767858:-	1110032A03Rik	-0.188598	0.0949051	2.78468
ENSMUSG00000027806;SE:3:58428299-58437317:58437475-58459331:+	Tsc22d2	0.188279	0.012987	10.6063
ENSMUSG00000030894;A3:7:105751729-105751982:105750330-105751982:-	Tpp1	0.186053	0.0629371	6.32526
ENSMUSG00000028273;AF:3:142391850-142395515:142395578:142391850-142395586:142395696:-	Pdlim5	-0.185661	0.0999001	5.52284
ENSMUSG00000061028;AF:7:19603305-19604325:19604405:19603305-19604412:19604459:-	Clasrp	-0.185348	0.0792208	2.61956
ENSMUSG00000032540;SE:9:122351839-122367889:122368261-122375906:+	Abhd5	-0.184979	0.0869131	3.50311
ENSMUSG00000021798;SE:14:34552322-34555343:34555528-34566857:-	Ldb3	-0.184801	0.0829171	0.485725
ENSMUSG00000057530;AF:4:137862297:137862381-137913768:137913471:137913629-137913768:+	Ece1	-0.183232	0.00599401	9.96366
ENSMUSG00000047246;A3:13:23585970-23620916:23585966-23620916:-	Hist1h2be	0.182806	0.0304695	2.0817
ENSMUSG00000002105;A3:2:91065739-91066013:91065714-91066013:-	Slc39a13	-0.182655	0.027972	4.65764
ENSMUSG00000085385;A5:2:158359432-158360459:158359432-158360527:-	Snhg17	0.182404	0.0815851	2.59717
ENSMUSG00000036916;SE:X:48591761-48593514:48593598-48594364:-	Zfp280c	-0.181858	0.0699301	1.7543
ENSMUSG00000052337;SE:6:71851880-71852766:71852867-71856912:+	Immt	-0.181147	0.056044	3.60305
ENSMUSG00000003273;SE:7:45701366-45702434:45702619-45702833:+	Car11	-0.180895	0.0543207	1.05227
ENSMUSG00000004891;RI:3:87975421:87976580-87976713:87980451:+	Nes	-0.180583	0.0034965	91.2213
ENSMUSG00000032615;A5:11:59848484-59852791:59848372-59852791:+	Nt5m	0.180444	0.041958	1.94914
ENSMUSG00000003273;SE:7:45703613-45703713:45703878-45704489:+	Car11	-0.178922	0.0599401	0.820459
ENSMUSG00000035227;AF:7:99849059-99858764:99858899:99849059-99863228:99863371:-	Spcs2	0.178343	0.013986	10.8599
ENSMUSG00000032263;AF:9:83925145:83925359-83952524:83948781:83948915-83952524:+	Bckdhb	0.178287	0.0524476	3.94333
ENSMUSG00000020513;SE:11:86555304-86556695:86556787-86557725:+	Tubd1	0.178166	0.0899101	0.447269
ENSMUSG00000068917;SE:3:89168923-89169615:89169702-89170049:+	Clk2	-0.177303	0.0824176	5.045
ENSMUSG00000015053;AF:6:88193891:88194000-88199517:88198334:88198881-88199517:+	Gata2	-0.17696	0.0194805	4.40071
ENSMUSG00000020745;AF:11:74699520-74723116:74723171:74699520-74723999:74724670:-	Pafah1b1	-0.176867	0.014985	23.0413
ENSMUSG00000038615;AF:11:96822319-96823945:96824013:96822319-96824076:96824127:-	Nfe2l1	-0.176738	0.0629371	6.69815
ENSMUSG00000003380;AF:7:24971858-24972003:24972026:24971858-24972102:24972227:-	Rabac1	-0.176732	0.0779221	2.62633
ENSMUSG00000066551;AF:5:149050751-149052338:149052377:149050751-149052900:149053011:-	Hmgb1	-0.176594	0.0854146	3.50068
ENSMUSG00000087575;AF:4:129261965:129262112-129264747:129263730:129263924-129264747:+	Gm12976	0.176482	0.0649351	1.40921
ENSMUSG00000031808;RI:8:71579404:71579798-71579907:71580068:+	Slc27a1	0.176194	0.0979021	1.71613
ENSMUSG00000085385;RI:2:158357198:158357263-158359182:158360599:-	Snhg17	0.176078	0.0815851	3.58765
ENSMUSG00000042719;SE:5:121398062-121407193:121407278-121408197:+	Naa25	0.176074	0.011988	6.2537
ENSMUSG00000017288;SE:11:76136314-76138308:76138394-76163798:-	Vps53	-0.175163	0.044955	4.07019
ENSMUSG00000026761;AF:2:48940400-48949117:48949232:48940400-48950118:48950277:-	Orc4	0.174582	0.0952936	2.10571
ENSMUSG00000052337;SE:6:71851880-71852730:71852867-71856912:+	Immt	-0.174531	0.056044	3.67848
ENSMUSG00000023249;AF:9:106475982-106476082:106476169:106475982-106476493:106476669:-	Parp3	0.174185	0.0659341	6.15726
ENSMUSG00000023249;RI:9:106474397:106474535-106474680:106474868:-	Parp3	0.174185	0.0659341	6.15726
ENSMUSG00000074405;SE:7:5020655-5028991:5032207-5032763:+	Zfp865	0.173917	0.0854146	0.341228
ENSMUSG00000028273;AF:3:142391850-142395515:142395578:142391850-142395586:142395618:-	Pdlim5	-0.173672	0.0999001	5.52284
ENSMUSG00000037971;AF:9:50764926-50765700:50766102:50764926-50767858:50768160:-	1110032A03Rik	0.173312	0.0715951	2.28751
ENSMUSG00000068917;SE:3:89168923-89169618:89169702-89170049:+	Clk2	-0.173104	0.0824176	1.18733
ENSMUSG00000073725;AF:1:24678660:24678816-24685397:24678926:24679034-24685397:+	Lmbrd1	-0.171492	0.0499501	3.61587
ENSMUSG00000074405;SE:7:5020655-5028991:5031279-5032763:+	Zfp865	0.171102	0.0509491	2.92921
ENSMUSG00000037971;A5:9:50764290-50764696:50764290-50764765:-	1110032A03Rik	0.170248	0.0715951	1.88819
ENSMUSG00000096768;RI:Y:90816349:90816433-90816436:90816464:+	Erdr1	-0.170125	0.0024975	29.0794
ENSMUSG00000030232;AF:6:140624298:140624344-140633689:140626882:140627057-140633689:+	Aebp2	-0.169373	0.032967	10.7546
ENSMUSG00000030232;AL:6:140650782-140651316:140652826:140650782-140677391:140677418:+	Aebp2	0.169373	0.032967	8.61722
ENSMUSG00000029913;SE:6:65779193-65794300:65794383-65831249:+	Prdm5	-0.168788	0.011988	3.19159
ENSMUSG00000073557;AL:1:134754658:134760495-134771998:134765943:134766077-134771998:-	Ppp1r12b	0.168752	0.038961	5.12793
ENSMUSG00000028759;SE:4:138216740-138221526:138221723-138222089:+	Hp1bp3	-0.168225	0.0719281	8.62042
ENSMUSG00000059981;SE:7:126868322-126868839:126868907-126871402:-	Taok2	0.167406	0.010989	4.74175
ENSMUSG00000030232;AF:6:140623499:140624344-140633689:140626882:140627057-140633689:+	Aebp2	-0.16717	0.032967	18.2187
ENSMUSG00000030232;RI:6:140650756:140650782-140651316:140652826:+	Aebp2	-0.16717	0.032967	18.2187
ENSMUSG00000004996;AL:8:84254245:84254352-84256890:84255792:84256419-84256890:-	Mri1	0.166812	0.0769231	0.357823
ENSMUSG00000020864;AL:11:94338521-94339240:94339509:94338521-94339553:94340148:+	Ankrd40	0.165817	0.025974	4.42231
ENSMUSG00000038843;AF:19:17333256-17339468:17339568:17333256-17356557:17356667:-	Gcnt1	-0.165546	0.0709291	0.139882
ENSMUSG00000044501;SE:17:22361707-22372036:22372088-22373643:+	Zfp758	-0.165516	0.0996503	1.02332
ENSMUSG00000019772;AF:10:5639218:5639370-5640618:5640352:5640489-5640618:+	Vip	0.165483	0.0869131	1.41751
ENSMUSG00000019772;RI:10:5640618:5640734-5642469:5642594:+	Vip	-0.165483	0.0869131	0.252342
ENSMUSG00000072704;SE:6:133105605-133106363:133106530-133107864:+	Smim10l1	0.165257	0.0679321	0.560511
ENSMUSG00000032366;AL:9:67022592:67023441-67031029:67027989:67028167-67031029:-	Tpm1	0.16509	0.0832501	33.1928
ENSMUSG00000031134;A3:X:57391701-57392852:57391698-57392852:-	Rbmx	-0.164973	0.018981	3.10425
ENSMUSG00000072774;AF:5:104817352-104828928:104828957:104817352-104859667:104860070:-	Zfp951	0.16343	0.0989011	0.179719
ENSMUSG00000037266;SE:4:134925432-134925777:134925821-134926735:+	Rsrp1	-0.162978	0.026973	9.7417
ENSMUSG00000037822;AF:5:65468501-65492736:65492871:65468501-65536789:65537184:-	Smim14	-0.16259	0.02997	16.7396
ENSMUSG00000031278;A3:X:142351908-142360387:142351615-142360387:-	Acsl4	-0.162229	0.0724276	1.63669
ENSMUSG00000002031;AF:9:44772960:44773173-44773688:44773263:44773287-44773688:+	Ift46	-0.162136	0.0749251	5.48377
ENSMUSG00000070871;AF:1:64690455:64690676-64691213:64690822:64690966-64691213:+	Ccnyl1	0.161973	0.0244755	1.14889
ENSMUSG00000033542;A5:6:43284054-43285359:43283331-43285359:+	Arhgef5	0.161559	0.0825841	1.55283
ENSMUSG00000028776;AF:4:130174207-130174723:130174792:130174207-130174902:130175122:-	Tinagl1	0.161395	0.0859141	1.09079
ENSMUSG00000061028;RI:7:19584470:19584530-19584784:19584823:-	Clasrp	0.161261	0.0497835	3.45352
ENSMUSG00000044730;A5:4:124937090-124937179:124937087-124937179:+	9930104L06Rik	0.161235	0.034965	1.70616
ENSMUSG00000028106;SE:3:95785106-95786320:95786451-95787284:-	Rprd2	0.160384	0.0709291	1.29582
ENSMUSG00000033460;SE:X:134718050-134718370:134718461-134718726:+	Armcx1	0.158821	0.0582751	2.20094
ENSMUSG00000037017;SE:5:138117007-138117836:138117920-138124978:+	Zscan21	0.158469	0.0614386	4.59666
ENSMUSG00000026193;SE:1:71597387-71597642:71597747-71598374:-	Fn1	0.158432	0.0201465	51.6394
ENSMUSG00000026219;AF:1:84814969-84839229:84839288:84814969-84840483:84840516:-	Trip12	-0.158237	0.0714286	17.5032
ENSMUSG00000035293;SE:12:51363546-51363952:51364020-51365255:+	G2e3	-0.158219	0.034965	1.99436
ENSMUSG00000023961;A5:17:44102664-44105649:44102664-44105711:-	Enpp4	0.158069	0.0584416	1.42649
ENSMUSG00000030530;AF:7:80398928-80401427:80401707:80398928-80405319:80405431:-	Furin	0.158016	0.0599401	1.5851
ENSMUSG00000029713;AF:5:137530840-137530975:137531038:137530840-137531530:137531952:-	Gnb2	-0.157672	0.02997	19.553
ENSMUSG00000040459;SE:8:8681467-8681841:8681948-8683748:-	Arglu1	-0.157453	0.0284715	6.41763
ENSMUSG00000032009;AF:9:14275083:14275437-14306199:14276301:14276629-14306199:+	Sesn3	0.15737	0.0869131	0.564236
ENSMUSG00000025723;A3:7:80902503-80904134:80902498-80904134:-	Nmb	0.157352	0.0704296	0.893047
ENSMUSG00000037266;A5:4:134926150-134926735:134925821-134926735:+	Rsrp1	0.157282	0.026973	4.94345
ENSMUSG00000092203;A5:17:34950847-34951885:34950847-34952136:-	1110038B12Rik	0.156924	0.0799201	4.25968
ENSMUSG00000032615;AF:11:59839447:59839756-59852791:59848073:59848372-59852791:+	Nt5m	0.155724	0.041958	3.66707
ENSMUSG00000069835;RI:11:69622052:69622115-69622256:69622332:+	Sat2	0.155401	0.0829171	1.22866
ENSMUSG00000032366;AL:9:67022592:67023441-67031029:67028848:67029742-67031029:-	Tpm1	0.155311	0.0832501	33.1928
ENSMUSG00000024845;A5:19:4127836-4131229:4127639-4131229:+	Tmem134	-0.155261	0.0932401	4.01668
ENSMUSG00000020935;SE:11:103027421-103027988:103028072-103028149:-	Dcakd	0.152556	0.0549451	0.465168
ENSMUSG00000047821;A3:11:62820637-62820732:62820637-62820735:+	Trim16	0.152375	0.0724276	0.583849
ENSMUSG00000033542;A3:6:43283331-43283893:43283331-43285359:+	Arhgef5	0.151957	0.0789211	3.11396
ENSMUSG00000030232;AF:6:140622663:140623058-140633689:140626882:140627057-140633689:+	Aebp2	-0.151889	0.0383616	5.85876
ENSMUSG00000020745;AF:11:74699520-74723116:74723171:74699520-74723200:74723858:-	Pafah1b1	-0.151812	0.034965	23.0413
ENSMUSG00000046962;RI:16:97947435:97950869-97951470:97953093:-	Zbtb21	-0.151733	0.040959	1.38799
ENSMUSG00000002346;RI:8:70184340:70185225-70185292:70186776:-	Slc25a42	-0.151197	0.0959041	2.00358
ENSMUSG00000045411;SE:7:44246823-44247238:44247416-44248252:+	2410002F23Rik	-0.150768	0.0599401	4.78064
ENSMUSG00000015656;A3:9:40802623-40802739:40802623-40802796:+	Hspa8	-0.150689	0.0274725	222.118
ENSMUSG00000031858;RI:8:70022620:70022669-70023607:70023697:-	Mau2	0.150363	0.0999001	1.93136
ENSMUSG00000059796;AF:11:69670747-69670928:69671450:69670747-69672279:69672316:-	Eif4a1	-0.149393	0.0499501	3.68502
ENSMUSG00000023286;AF:4:155943869:155944013-155946255:155944158:155944259-155946255:+	Ube2j2	-0.149189	0.0786713	17.9279
ENSMUSG00000039218;SE:17:23803398-23806932:23807202-23808066:+	Srrm2	-0.148375	0.017982	29.4159
ENSMUSG00000079467;AF:19:6360781-6363328:6363535:6360781-6363607:6363759:-	Gm14966	0.147868	0.0964036	0.716893
ENSMUSG00000026748;SE:2:16669904-16703317:16703383-16712082:+	Plxdc2	-0.147177	0.033966	14.4526
ENSMUSG00000079658;AF:1:16648007-16656822:16656884:16648007-16656912:16657018:-	Tceb1	0.147072	0.0899101	35.3326
ENSMUSG00000053754;AF:14:52235501-52236730:52237572:52235501-52237742:52237791:-	Chd8	0.147029	0.0886613	4.06264
ENSMUSG00000027611;A3:2:155751159-155751345:155751159-155751348:+	Procr	-0.147022	0.0524476	1.55882
ENSMUSG00000031134;A3:X:57391701-57392852:57391682-57392852:-	Rbmx	-0.146928	0.018981	3.10425
ENSMUSG00000039623;A3:5:142474050-142474374:142474050-142474422:+	Ap5z1	0.146831	0.0699301	3.62932
ENSMUSG00000025393;AF:10:128088491:128088533-128088957:128088552:128088572-128088957:+	Atp5b	0.146675	0.00824176	1.2339
ENSMUSG00000006800;AF:2:166132854-166154678:166154806:166132854-166155503:166155605:-	Sulf2	-0.146247	0.0899101	6.73298
ENSMUSG00000030530;AF:7:80398928-80403272:80403322:80398928-80405319:80405431:-	Furin	0.145933	0.0599401	16.8112
ENSMUSG00000027810;SE:3:58537608-58539590:58539646-58541040:+	Eif2a	-0.145877	0.0664336	0.874008
ENSMUSG00000030386;SE:7:12481026-12481118:12481181-12489570:+	Zfp606	0.145629	0.0949051	0.756133
ENSMUSG00000021134;RI:12:80947796:80947865-80949095:80949168:+	Srsf5	0.144363	0.0244755	18.8282
ENSMUSG00000026193;RI:1:71597281:71597672-71598374:71598463:-	Fn1	0.144181	0.0201465	232.012
ENSMUSG00000033931;SE:8:126959585-126961912:126961971-126965382:-	Rbm34	0.143853	0.0124875	7.22619
ENSMUSG00000060036;RI:15:80080896:80081211-80081615:80081783:-	Rpl3	0.143547	0.027972	15.3279
ENSMUSG00000024908;A3:19:3473866-3484831:3473815-3484831:-	Ppp6r3	-0.143176	0.0584416	2.32555
ENSMUSG00000040652;A5:9:65686271-65686273:65686268-65686273:+	Oaz2	0.142963	0.026973	12.4497
ENSMUSG00000004996;AF:8:84254352-84256244:84256413:84254352-84256890:84257326:-	Mri1	-0.142886	0.0769231	3.96782
ENSMUSG00000038520;RI:7:44841983:44842099-44842186:44842300:-	Tbc1d17	0.142839	0.0519481	3.79271
ENSMUSG00000035227;AF:7:99849059-99858764:99858876:99849059-99863228:99863371:-	Spcs2	0.142481	0.014985	14.694
ENSMUSG00000026761;AF:2:48940400-48949117:48949234:48940400-48949958:48950039:-	Orc4	0.141153	0.0849151	2.03033
ENSMUSG00000037999;SE:5:62604656-62606075:62606209-62611704:-	Arap2	-0.140737	0.0854146	4.57168
ENSMUSG00000069565;AF:10:80261486:80261575-80274007:80265124:80265178-80274007:+	Dazap1	-0.140727	0.0569431	8.43241
ENSMUSG00000033460;A5:X:134719108-134719627:134718992-134719627:+	Armcx1	0.140453	0.0582751	4.36235
ENSMUSG00000026781;AF:2:23068168:23068286-23069451:23069068:23069284-23069451:+	Acbd5	-0.139716	0.0689311	2.52539
ENSMUSG00000022680;AL:16:13834160:13834846-13837043:13835592:13836615-13837043:-	Pdxdc1	-0.139241	0.035964	17.4389
ENSMUSG00000029415;A3:5:92298261-92300062:92298258-92300062:-	Sdad1	0.139067	0.00899101	5.27947
ENSMUSG00000002345;AF:8:70139707:70139772-70141864:70140277:70140356-70141864:+	Borcs8	0.138195	0.03996	9.65996
ENSMUSG00000040123;MX:14:56804863-56810541:56810596-56811592:56804863-56810740:56810859-56811592:-	Zmym5	-0.137901	0.0739261	0.661603
ENSMUSG00000004952;RI:5:136101244:136101394-136101625:136101689:+	Rasa4	0.137819	0.0679321	1.17732
ENSMUSG00000060288;AL:4:119300010:119300202-119310759:119307160:119307883-119310759:-	Ppih	0.136816	0.0929071	4.56801
ENSMUSG00000019710;A5:3:87919705-87919803:87919651-87919803:+	Mrpl24	-0.136705	0.0807526	3.66977
ENSMUSG00000059796;AF:11:69670976-69671605:69671730:69670976-69672279:69672423:-	Eif4a1	0.134855	0.0474525	4.90806
ENSMUSG00000004771;SE:9:64716988-64725502:64725582-64726624:-	Rab11a	0.134795	0.018315	35.5223
ENSMUSG00000028106;A3:3:95786451-95787284:95786397-95787284:-	Rprd2	0.134348	0.0709291	1.29582
ENSMUSG00000027254;SE:2:121299046-121299269:121307372-121307515:+	Map1a	0.13429	0.016983	6.71689
ENSMUSG00000027255;SE:2:91268508-91269070:91269111-91269452:+	Arfgap2	0.134208	0.00849151	7.73797
ENSMUSG00000020827;SE:11:70608426-70608589:70608699-70608840:+	Mink1	0.134074	0.0839161	3.80703
ENSMUSG00000053062;A3:16:84816373-84818758:84816373-84818760:+	Jam2	-0.1339	0.016983	2.9239
ENSMUSG00000043969;AF:19:59459519:59459624-59463880:59462802:59462887-59463880:+	Emx2	-0.133712	0.0589411	3.74378
ENSMUSG00000062931;A5:10:82226593-82227445:82226593-82227531:-	Zfp938	-0.13345	0.038961	3.52436
ENSMUSG00000023505;AF:6:124829688:124830273-124830503:124830375:124830417-124830503:+	Cdca3	-0.133261	0.0849151	9.75512
ENSMUSG00000026761;AF:2:48940400-48949117:48949234:48940400-48950118:48950277:-	Orc4	0.132938	0.0849151	2.03033
ENSMUSG00000030120;A3:6:124931586-124932099:124931586-124932411:+	Mlf2	-0.132845	0.047952	3.30214
ENSMUSG00000029713;SE:5:137529765-137529846:137529909-137533139:-	Gnb2	0.131878	0.02997	39.4494
ENSMUSG00000066839;SE:9:22078265-22084023:22084208-22085349:-	Ecsit	0.131269	0.0614386	6.7297
ENSMUSG00000026761;AF:2:48909514-48909989:48910013:48909514-48910186:48910668:-	Orc4	0.130849	0.0849151	5.85808
ENSMUSG00000038615;AF:11:96822319-96824076:96824127:96822319-96827198:96827955:-	Nfe2l1	0.130775	0.0629371	3.83741
ENSMUSG00000035064;AF:7:120843600:120843785-120858344:120851189:120851369-120858344:+	Eef2k	0.130706	0.0779221	12.4991
ENSMUSG00000031540;SE:8:22859632-22861517:22861602-22861888:+	Kat6a	0.130531	0.031968	6.45419
ENSMUSG00000066551;AF:5:149050751-149051279:149051616:149050751-149052900:149053011:-	Hmgb1	-0.129032	0.0854146	7.71803
ENSMUSG00000026761;A3:2:48910294-48912562:48910245-48912562:-	Orc4	0.128405	0.0849151	11.3974
ENSMUSG00000031340;RI:X:72264519:72264608-72264705:72264739:-	Gabre	0.128231	0.0884116	1.92864
ENSMUSG00000031340;SE:X:72262582-72263743:72263825-72264519:-	Gabre	0.128231	0.0884116	1.92864
ENSMUSG00000096768;A5:Y:90793680-90816349:90793417-90816349:+	Erdr1	-0.128133	0.0024975	51.8601
ENSMUSG00000029064;AF:4:155492909:155493044-155527413:155522462:155522658-155527413:+	Gnb1	0.128006	0.0454545	1.2976
ENSMUSG00000010538;A5:3:88295450-88296763:88295450-88296824:-	Tsacc	-0.127902	0.0694306	0.351483
ENSMUSG00000095304;AF:14:25890855-25902379:25902476:25890855-25902786:25903100:-	Plac9a	0.127694	0.0484515	4.48843
ENSMUSG00000027663;AF:3:32361216-32365166:32365460:32361216-32365504:32365620:-	Zmat3	-0.127389	0.0959041	2.71648
ENSMUSG00000001918;RI:7:16795758:16795952-16796024:16796158:+	Slc1a5	0.127348	0.041958	3.48879
ENSMUSG00000085645;AF:11:96293554-96304982:96305081:96293554-96306737:96306910:-	Hoxb5os	0.127322	0.021978	3.56672
ENSMUSG00000013415;SE:11:95979669-95981049:95981130-95982502:-	Igf2bp1	-0.127078	0.0414585	0.704961
ENSMUSG00000029844;RI:6:52157567:52157661-52157865:52158317:-	Hoxa1	-0.126727	0.0714286	2.68003
ENSMUSG00000024608;AF:18:60774681:60774781-60776401:60775229:60775317-60776401:+	Rps14	-0.12665	0.0559441	43.8349
ENSMUSG00000031897;A5:8:105936754-105936866:105936754-105936982:-	Psmb10	-0.126315	0.0464535	9.12088
ENSMUSG00000057113;AL:11:33154927:33155220-33156003:33155328:33155431-33156003:-	Npm1	0.125348	0.00899101	250.409
ENSMUSG00000062737;A3:13:27121772-27122323:27121772-27122326:+	Prl3d2	-0.124613	0.0584416	3.32863
ENSMUSG00000015165;AF:7:28808808:28808859-28813279:28810937:28811168-28813279:+	Hnrnpl	-0.124556	0.0422078	24.1862
ENSMUSG00000052926;RI:8:84957667:84957853-84957966:84958089:-	Rnaseh2a	0.124265	0.0989011	7.59175
ENSMUSG00000036948;SE:5:138260989-138261553:138261716-138261802:-	BC037034	-0.124096	0.044955	3.74669
ENSMUSG00000073422;RI:17:34026033:34026225-34026396:34026470:-	H2-Ke6	0.123474	0.0959041	1.89033
ENSMUSG00000046572;SE:5:38682782-38683193:38683258-38684679:-	Zfp518b	-0.123141	0.0559441	2.9838
ENSMUSG00000031858;RI:8:70022620:70022669-70023614:70023697:-	Mau2	0.123118	0.0999001	1.93136
ENSMUSG00000027247;AF:2:91650118:91650252-91654073:91651747:91651823-91654073:+	Arhgap1	0.122128	0.0865385	7.78812
ENSMUSG00000023992;A3:17:48351191-48351691:48351191-48351746:+	Trem2	0.121863	0.0844156	0.666013
ENSMUSG00000079084;SE:9:13247021-13249259:13249342-13252071:+	Ccdc82	-0.121086	0.0544456	1.41062
ENSMUSG00000030035;SE:6:83120287-83120772:83120876-83121203:-	Wbp1	-0.120988	0.0412088	4.10831
ENSMUSG00000038615;AF:11:96828223-96829411:96829502:96828223-96829819:96829968:-	Nfe2l1	-0.120581	0.047952	33.7684
ENSMUSG00000061028;A5:7:19590335-19591090:19590335-19591106:-	Clasrp	-0.120398	0.0497835	3.08395
ENSMUSG00000063802;A3:7:4684566-4684894:4684482-4684894:-	Hspbp1	-0.120327	0.0579421	8.50287
ENSMUSG00000026781;AF:2:23068201:23068286-23069451:23069072:23069284-23069451:+	Acbd5	0.120195	0.0689311	7.23168
ENSMUSG00000029713;AF:5:137530840-137530975:137531038:137530840-137533139:137533510:-	Gnb2	-0.12012	0.02997	19.553
ENSMUSG00000059456;SE:14:66158677-66163025:66163150-66165264:-	Ptk2b	-0.119873	0.0614386	3.12982
ENSMUSG00000082286;SE:11:3126058-3127131:3127219-3127479:+	Pisd-ps1	0.119474	0.0584416	1.9812
ENSMUSG00000004996;A5:8:84254352-84256244:84254352-84256308:-	Mri1	0.119402	0.0734266	5.07776
ENSMUSG00000030421;SE:7:37967489-37969380:37969437-37969606:-	Uri1	-0.119183	0.0559441	4.78112
ENSMUSG00000026193;RI:1:71597281:71597747-71598374:71598463:-	Fn1	0.119128	0.0201465	232.012
ENSMUSG00000029580;AF:5:142905692-142905849:142905937:142905692-142906652:142906694:-	Actb	-0.119051	0.0549451	17.6487
ENSMUSG00000023505;AF:6:124829547:124829639-124830503:124830375:124830417-124830503:+	Cdca3	-0.117671	0.0849151	10.5114
ENSMUSG00000021932;A3:14:62346642-62348521:62346642-62348562:+	Rnaseh2b	0.117543	0.0674326	6.14158
ENSMUSG00000020528;SE:11:61752933-61755410:61755462-61756195:-	Prpsap2	0.117159	0.0839161	3.95906
ENSMUSG00000037608;A3:10:20322116-20322963:20322116-20322969:+	Bclaf1	0.116758	0.027972	9.65408
ENSMUSG00000038740;AF:2:33874460-33886786:33886845:33874460-33887320:33887946:-	Mvb12b	-0.116392	0.032967	3.64389
ENSMUSG00000059273;SE:7:16401306-16402455:16402516-16416773:+	Zc3h4	0.116318	0.0262238	10.1725
ENSMUSG00000059273;SE:7:16429910-16432774:16433022-16434021:+	Zc3h4	-0.116318	0.0262238	3.61776
ENSMUSG00000035342;A5:19:45015323-45021387:45015313-45021387:+	Lzts2	0.116181	0.0704296	9.68934
ENSMUSG00000024766;AF:19:33588343-33589891:33590308:33588343-33761598:33761951:-	Lipo3	0.116172	0.0979021	2.00767
ENSMUSG00000055296;SE:4:56916806-56922387:56922410-56923339:-	Tmem245	-0.115988	0.0759241	8.48576
ENSMUSG00000024742;A5:19:10201097-10203688:10201097-10203804:-	Fen1	0.115819	0.0569431	5.8308
ENSMUSG00000027087;RI:2:83803240:83803336-83806633:83806916:+	Itgav	-0.115303	0.02997	55.4125
ENSMUSG00000024830;RI:19:4158610:4158717-4158829:4158919:-	Rps6kb2	0.115031	0.0919081	1.45611
ENSMUSG00000002105;AF:2:91068739-91068821:91068871:91068739-91070155:91070283:-	Slc39a13	0.114836	0.027972	12.8183
ENSMUSG00000028277;SE:4:33031616-33036709:33036782-33038199:+	Ube2j1	0.114763	0.010656	44.9073
ENSMUSG00000021192;AF:12:102469134:102469363-102471998:102469910:102469981-102471998:+	Golga5	-0.114025	0.0184815	9.99575
ENSMUSG00000026127;A3:1:34443695-34443769:34443695-34443997:+	Imp4	0.113571	0.0889111	1.14876
ENSMUSG00000027247;AF:2:91651747:91651823-91654073:91653208:91653551-91654073:+	Arhgap1	-0.113177	0.0865385	6.66686
ENSMUSG00000061028;AF:7:19603305-19604325:19604405:19603305-19604412:19604463:-	Clasrp	-0.11298	0.0795455	2.61956
ENSMUSG00000039844;A3:2:29707400-29710153:29707400-29710156:+	Rapgef1	-0.112945	0.0569431	3.14359
ENSMUSG00000070476;A5:2:178414726-178416632:178414708-178416632:+	Fam217b	-0.112923	0.0974026	0.482318
ENSMUSG00000020069;A5:10:63017610-63018041:63017610-63018086:-	Hnrnph3	0.112854	0.045954	2.91893
ENSMUSG00000021877;SE:14:26638486-26646914:26647023-26653106:+	Arf4	-0.112627	0.0599401	10.4992
ENSMUSG00000054723;AF:17:56715817-56716634:56716921:56715817-56717598:56717699:-	Vmac	-0.112388	0.028971	6.51227
ENSMUSG00000047824;A5:3:89431018-89431127:89430838-89431127:+	Pygo2	0.111808	0.0874126	6.63708
ENSMUSG00000027652;A3:2:158440971-158443238:158440971-158443304:+	Ralgapb	-0.111762	0.0974026	3.37022
ENSMUSG00000051650;AF:11:22837195-22859494:22860101:22837195-22860940:22860961:-	B3gnt2	0.111413	0.0606893	7.21752
ENSMUSG00000040242;SE:6:146590036-146592634:146592747-146595176:+	Fgfr1op2	-0.111378	0.0629371	6.23921
ENSMUSG00000041453;AF:5:146832890:146833171-146834184:146833195:146833566-146834184:+	Rpl21	0.111358	0.034965	137.468
ENSMUSG00000030672;AF:7:127208899:127208951-127212861:127211608:127211763-127212861:+	Mylpf	-0.111098	0.0554446	2.36764
ENSMUSG00000016382;AF:X:75826953-75842904:75843063:75826953-75874338:75874574:-	Pls3	0.110223	0.0699301	20.5149
ENSMUSG00000079641;AL:X:37083643:37084088-37085125:37084537:37085016-37085125:-	Rpl39	0.110013	0.0884116	1.80899
ENSMUSG00000020455;A3:11:58988747-58988829:58988747-58988836:+	Trim11	-0.109829	0.02997	12.3784
ENSMUSG00000024845;SE:19:4127836-4131031:4131075-4131229:+	Tmem134	-0.109446	0.0839161	2.27394
ENSMUSG00000026753;AF:2:39211053-39225808:39226032:39211053-39226167:39226451:-	Ppp6c	-0.109276	0.0524476	15.9486
ENSMUSG00000026761;AF:2:48940400-48949117:48949232:48940400-48949958:48950039:-	Orc4	0.109036	0.0849151	2.10571
ENSMUSG00000031586;SE:8:33784186-33789392:33789495-33795082:-	Rbpms	-0.109015	0.0652681	1.8357
ENSMUSG00000002059;AF:11:78188440:78188511-78189571:78188779:78189390-78189571:+	Rab34	0.108782	0.0437063	5.76108
ENSMUSG00000030538;SE:7:80230424-80232344:80232378-80232510:-	Cib1	-0.108719	0.0599401	17.5918
ENSMUSG00000038069;A5:8:47712294-47712888:47712294-47712919:-	Cdkn2aip	-0.108614	0.0524476	3.91187
ENSMUSG00000037266;AF:4:134924460:134924482-134925293:134924710:134925007-134925293:+	Rsrp1	-0.107483	0.046953	9.7417
ENSMUSG00000046062;A5:1:133133615-133136663:133131910-133136663:+	Ppp1r15b	-0.106677	0.0144855	20.7271
ENSMUSG00000061244;SE:14:49042549-49048704:49048898-49051320:-	Exoc5	0.10628	0.0579421	26.5567
ENSMUSG00000036948;SE:5:138262744-138262847:138262976-138263067:-	BC037034	-0.104863	0.044955	2.86838
ENSMUSG00000057530;SE:4:137862381-137905070:137905155-137913768:+	Ece1	0.104485	0.013986	42.7405
ENSMUSG00000078606;SE:7:105903847-105914494:105914547-105953855:-	Gm4070	-0.10392	0.0959041	2.54443
ENSMUSG00000038072;AF:5:25222882:25223031-25247454:25246373:25246420-25247454:+	Galnt11	-0.103841	0.044955	7.73952
ENSMUSG00000030122;AF:6:124914989-124915360:124915529:124914989-124920039:124920103:-	Ptms	0.103559	0.0539461	6.90555
ENSMUSG00000039262;SE:2:32212291-32212887:32214947-32216046:+	Prrc2b	0.102919	0.0314685	17.2428
ENSMUSG00000027285;AF:2:120609383:120609545-120612338:120609595:120609658-120612338:+	Haus2	-0.102067	0.0609391	5.69074
ENSMUSG00000032518;A3:9:120129276-120130045:120129276-120130118:+	Rpsa	0.10129	0.012987	907.846
ENSMUSG00000023505;AF:6:124829547:124829639-124830503:124830235:124830273-124830503:+	Cdca3	-0.101261	0.0849151	10.5114
ENSMUSG00000033769;RI:6:85003048:85003093-85003195:85003285:-	Exoc6b	-0.100835	0.0764236	0.883115
ENSMUSG00000027082;A5:2:84473799-84476691:84473799-84476741:-	Tfpi	0.100359	0.0879121	3.03933
ENSMUSG00000001472;AL:8:123400697-123401076:123401892:123400697-123403150:123403806:+	Tcf25	-0.100318	0.0481185	16.4628
ENSMUSG00000002325;SE:14:55604243-55604468:55604553-55605052:+	Irf9	0.100317	0.0994006	1.71672
ENSMUSG00000030562;A3:7:87247583-87295784:87247583-87295788:+	Nox4	-0.100245	0.0919081	3.69598
ENSMUSG00000021458;A3:13:63033189-63061035:63033189-63061041:+	2010111I01Rik	-0.100153	0.045954	6.06537
ENSMUSG00000003992;SE:13:91564694-91642302:91642391-91664118:+	Ssbp2	0.100053	0.037962	3.74821
ENSMUSG00000026219;AF:1:84814969-84839229:84839304:84814969-84840483:84840516:-	Trip12	-0.100042	0.0714286	8.57651
ENSMUSG00000029713;AF:5:137530436-137530695:137531297:137530436-137533139:137533297:-	Gnb2	0.0999188	0.0650778	6.04991
ENSMUSG00000002105;A3:2:91065714-91066013:91065700-91066013:-	Slc39a13	0.0998802	0.027972	11.3883
ENSMUSG00000045980;SE:11:115205583-115228421:115228514-115243370:+	Tmem104	0.0998328	0.0739261	3.35843
ENSMUSG00000031671;A5:8:95717062-95717921:95717041-95717921:+	Setd6	0.0995636	0.0779221	3.69105
ENSMUSG00000029068;SE:4:155817987-155818539:155818664-155820329:+	Ccnl2	0.099393	0.0974026	1.76294
ENSMUSG00000050079;A5:8:94602430-94622834:94602104-94622834:+	Rspry1	0.0990065	0.0649351	3.9264
ENSMUSG00000020069;SE:10:63018225-63018760:63018898-63019393:-	Hnrnph3	-0.0986781	0.045954	1.48182
ENSMUSG00000026034;SE:1:58419733-58420121:58420211-58421083:-	Clk1	0.0986315	0.0599401	16.4311
ENSMUSG00000001472;AL:8:123400697-123401076:123401892:123400697-123403147:123403806:+	Tcf25	-0.0984991	0.0481185	16.4628
ENSMUSG00000041846;A5:12:101051662-101053429:101051662-101053468:-	Smek1	-0.0984565	0.0194805	6.85074
ENSMUSG00000020917;SE:11:100498762-100503160:100503189-100504203:-	Acly	-0.0984024	0.011988	49.18
ENSMUSG00000040521;AF:10:127029682-127030200:127030391:127029682-127030463:127030759:-	Tsfm	0.0981451	0.0849151	1.65448
ENSMUSG00000041775;A3:7:138837030-138845957:138836926-138845957:-	Mapk1ip1	-0.0975536	0.0864136	3.91986
ENSMUSG00000037243;A3:11:58307256-58307512:58307256-58307574:+	Zfp692	0.0973534	0.043956	6.3738
ENSMUSG00000041775;SE:7:138837030-138840577:138840934-138845957:-	Mapk1ip1	0.0973076	0.0864136	1.20856
ENSMUSG00000032265;A5:9:85326805-85326988:85326805-85327043:-	Fam46a	-0.0970344	0.0589411	1.76584
ENSMUSG00000004865;SE:17:28599869-28600243:28600456-28600869:-	Srpk1	0.0969338	0.014985	23.3759
ENSMUSG00000029246;RI:5:76919371:76919498-76919756:76919907:-	Ppat	-0.0968688	0.0649351	4.45186
ENSMUSG00000039262;SE:2:32227036-32229263:32229344-32230611:+	Prrc2b	0.0966341	0.0314685	8.62139
ENSMUSG00000025979;MX:1:55131359-55136677:55136739-55148319:55131359-55145124:55145224-55148319:+	Mob4	0.0965698	0.0819181	3.15899
ENSMUSG00000027883;SE:3:108703086-108711277:108711580-108722041:-	Gpsm2	-0.0964668	0.0574426	6.01046
ENSMUSG00000031565;SE:8:25532428-25555508:25555774-25557731:+	Fgfr1	-0.0963441	0.0917083	13.675
ENSMUSG00000038615;AF:11:96828223-96829411:96829501:96828223-96829819:96829968:-	Nfe2l1	0.0963238	0.0629371	8.7399
ENSMUSG00000024830;A3:19:4158363-4158610:4158128-4158610:-	Rps6kb2	0.096208	0.0919081	1.97119
ENSMUSG00000063077;SE:4:149263690-149265345:149265362-149266252:-	Kif1b	-0.0962073	0.038961	12.127
ENSMUSG00000007850;RI:11:50379821:50379964-50382537:50382715:+	Hnrnph1	0.0961987	0.0599401	10.9268
ENSMUSG00000034647;SE:17:66037639-66042533:66042601-66049786:-	Ankrd12	-0.0959565	0.0969031	2.03232
ENSMUSG00000027108;AL:2:73093202:73093724-73141898:73137527:73137655-73141898:-	Ola1	0.0958207	0.0669331	6.23746
ENSMUSG00000053754;RI:14:52204433:52204584-52204790:52205506:-	Chd8	0.095775	0.0886613	1.53176
ENSMUSG00000002105;SE:2:91066126-91068431:91068739-91070155:-	Slc39a13	-0.0956952	0.027972	26.8223
ENSMUSG00000028789;A3:4:128962204-128962301:128962201-128962301:-	Azin2	-0.0955867	0.038961	5.89456
ENSMUSG00000033253;SE:4:118366315-118367442:118367622-118369180:-	Szt2	0.0953106	0.0859141	1.92116
ENSMUSG00000027247;AF:2:91649860:91650252-91651764:91651498:91651654-91651764:+	Arhgap1	-0.0952972	0.0865385	15.9985
ENSMUSG00000020719;RI:11:106782469:106782693-106783959:106784018:-	Ddx5	0.0952713	0.002997	72.0718
ENSMUSG00000029713;AF:5:137530436-137530695:137530899:137530436-137533139:137533297:-	Gnb2	0.0950515	0.0650778	5.33511
ENSMUSG00000021782;SE:14:24136678-24137130:24137239-24138237:-	Dlg5	-0.0948993	0.0799201	7.60116
ENSMUSG00000068744;A5:3:108383926-108384236:108383895-108384236:+	Psrc1	0.0946542	0.0539461	16.6982
ENSMUSG00000024845;SE:19:4127639-4127760:4127836-4131229:+	Tmem134	-0.0945099	0.0839161	8.57988
ENSMUSG00000004996;SE:8:84254352-84256244:84256419-84256890:-	Mri1	-0.0944654	0.0811189	6.18771
ENSMUSG00000039745;A3:7:49759311-49759542:49759311-49759598:+	Htatip2	0.0943722	0.0529471	4.89244
ENSMUSG00000052155;SE:2:48897110-48898478:48898608-48899594:+	Acvr2a	-0.0941559	0.0544456	6.50107
ENSMUSG00000006005;RI:1:150445868:150445963-150446085:150446241:+	Tpr	0.093945	0.0524476	5.24114
ENSMUSG00000047731;AF:19:46599113:46599293-46644353:46623401:46623579-46644353:+	Wbp1l	0.0939101	0.0936563	4.10745
ENSMUSG00000046711;SE:17:27556711-27556952:27557066-27559533:+	Hmga1	-0.0938665	0.0124875	75.1691
ENSMUSG00000028614;SE:4:107368148-107368757:107368877-107371262:+	Ndc1	0.0934924	0.0294705	6.50324
ENSMUSG00000067365;AL:5:38267284-38267698:38267907:38267284-38269059:38269634:+	Tmem128	-0.0927949	0.0494505	13.5093
ENSMUSG00000042834;AF:18:33463419-33463600:33463747:33463419-33463853:33464029:-	Nrep	0.0925124	0.031968	5.52991
ENSMUSG00000046711;A5:17:27557066-27559533:27556711-27559533:+	Hmga1	-0.0924468	0.0124875	46.2128
ENSMUSG00000016262;AF:1:192851143-192851693:192851747:192851143-192855443:192855756:-	Sertad4	0.0924067	0.023976	2.079
ENSMUSG00000079317;AF:X:166440574:166440839-166446791:166445303:166445373-166446791:+	Trappc2	-0.0923288	0.0519481	13.8106
ENSMUSG00000020802;A3:11:116543732-116543866:116543727-116543866:-	Ube2o	-0.0923057	0.025974	15.2253
ENSMUSG00000006276;A5:8:72373946-72378991:72373946-72379084:-	Eps15l1	0.0920007	0.0699301	5.38645
ENSMUSG00000027652;SE:2:158437476-158439529:158439564-158440770:+	Ralgapb	0.0917153	0.0974026	0.767375
ENSMUSG00000005481;AF:8:83715268:83715337-83719387:83715548:83715846-83719387:+	Ddx39	-0.0915983	0.0769231	4.46622
ENSMUSG00000006378;AL:15:79036874-79037143:79038348:79036874-79041928:79042531:+	Gcat	0.0912182	0.0764236	4.51067
ENSMUSG00000016477;AF:13:29920225-29984128:29984219:29920225-29985300:29985668:-	E2f3	-0.0907788	0.0144855	14.534
ENSMUSG00000056204;AF:8:70657480-70658778:70658912:70657480-70659610:70659651:-	Pgpep1	-0.090458	0.0749251	2.48936
ENSMUSG00000058301;A5:8:70339841-70339982:70339841-70340015:-	Upf1	0.0904375	0.021978	7.0131
ENSMUSG00000070283;SE:9:108566259-108566341:108566407-108566556:-	Ndufaf3	0.0904273	0.0734266	2.5123
ENSMUSG00000030704;AF:7:100607410:100607520-100626552:100607690:100608293-100626552:+	Rab6a	0.090357	0.0824176	0.76352
ENSMUSG00000016921;RI:2:162931994:162932142-162933426:162933550:+	Srsf6	0.0900935	0.0639361	15.7533
ENSMUSG00000015165;AF:7:28809518:28809549-28813279:28810937:28811168-28813279:+	Hnrnpl	-0.0899008	0.0535714	7.08738
ENSMUSG00000026219;A3:1:84759127-84760763:84759046-84760763:-	Trip12	0.08964	0.0714286	8.75088
ENSMUSG00000026219;A3:1:84777507-84782827:84777489-84782827:-	Trip12	0.08964	0.0714286	8.75088
ENSMUSG00000021546;SE:13:58400417-58401110:58401172-58402064:-	Hnrnpk	-0.0893862	0.0959041	38.511
ENSMUSG00000012296;SE:17:46264978-46271800:46271929-46282346:-	Tjap1	-0.0893171	0.0764236	11.0349
ENSMUSG00000031715;A3:8:80726717-80727616:80726366-80727616:-	Smarca5	-0.0892153	0.012987	9.58947
ENSMUSG00000041308;SE:8:107001706-107009781:107009965-107011292:+	Sntb2	-0.0889486	0.0659341	4.70355
ENSMUSG00000038759;A5:6:35214399-35214646:35214383-35214646:+	Nup205	-0.0887675	0.0412088	10.6421
ENSMUSG00000038759;SE:6:35205534-35206120:35206219-35208081:+	Nup205	0.0887675	0.0412088	1.55368
ENSMUSG00000056050;AF:1:183344385-183345186:183345296:183344385-183350964:183351086:-	Mia3	-0.0884936	0.0554446	31.9019
ENSMUSG00000002325;AF:14:55603985:55604243-55605052:55604579:55604721-55605052:+	Irf9	0.0884696	0.0994006	3.41814
ENSMUSG00000059436;SE:12:76953276-76961263:76961289-76961990:-	Max	0.0884098	0.010989	18.937
ENSMUSG00000029068;RI:4:155818539:155818664-155820329:155820428:+	Ccnl2	-0.0880088	0.0974026	11.5353
ENSMUSG00000093803;RI:9:124439588:124439674-124440048:124440122:-	Ppp2r3d	0.087814	0.0749251	5.23381
ENSMUSG00000030605;SE:7:79143050-79143278:79143388-79145247:-	Mfge8	-0.087582	0.0549451	113.173
ENSMUSG00000019710;A5:3:87919705-87921817:87919651-87921817:+	Mrpl24	0.0872709	0.0807526	7.69557
ENSMUSG00000002105;SE:2:91064804-91064906:91065007-91065582:-	Slc39a13	-0.0870099	0.027972	13.9881
ENSMUSG00000042606;RI:7:126862600:126862720-126862818:126862926:+	Hirip3	0.0868816	0.0924076	2.03094
ENSMUSG00000001472;AL:8:123400697-123401076:123401231:123400697-123403150:123403835:+	Tcf25	-0.0867871	0.0704795	14.018
ENSMUSG00000029048;SE:4:155082754-155083109:155083317-155086205:-	Rer1	-0.0866643	0.0374625	29.3982
ENSMUSG00000024317;SE:18:21020999-21024409:21024516-21026086:+	Rnf138	0.0865227	0.0454545	7.93222
ENSMUSG00000027750;SE:3:54377606-54380412:54380492-54383388:+	Postn	-0.0864028	0.0352148	10.888
ENSMUSG00000046711;A5:17:27559703-27560928:27559670-27560928:+	Hmga1	0.0862095	0.0124875	90.1597
ENSMUSG00000001065;RI:8:123264816:123264926-123264995:123265070:+	Zfp276	0.0861165	0.0879121	1.46145
ENSMUSG00000020827;A3:11:70609717-70610078:70609717-70610081:+	Mink1	-0.0858654	0.0926573	4.43765
ENSMUSG00000022884;A3:16:23111896-23112351:23111896-23113167:+	Eif4a2	0.0857393	0.0965701	48.9705
ENSMUSG00000047843;AF:5:144244437:144244615-144255810:144255234:144255519-144255810:+	Bri3	0.0857232	0.021978	12.8156
ENSMUSG00000026193;SE:1:71612650-71613763:71614035-71615360:-	Fn1	-0.0855262	0.0302198	290.652
ENSMUSG00000031365;SE:X:73344912-73351269:73351360-73351809:+	Zfp275	0.0851499	0.046953	5.92529
ENSMUSG00000001065;A5:8:123258389-123259431:123258357-123259431:+	Zfp276	-0.0850519	0.0879121	6.00875
ENSMUSG00000006276;SE:8:72346171-72358313:72358445-72367904:-	Eps15l1	-0.0849917	0.0699301	10.0556
ENSMUSG00000020629;AF:12:28675231:28675372-28677778:28675484:28675549-28677778:+	Adi1	-0.0847156	0.0334665	16.3587
ENSMUSG00000001472;AL:8:123400697-123401076:123401231:123400697-123403150:123403806:+	Tcf25	-0.0845507	0.0481185	14.018
ENSMUSG00000027247;SE:2:91650252-91651764:91651823-91654073:+	Arhgap1	-0.0843625	0.0865385	15.9985
ENSMUSG00000066839;A5:9:22084208-22085349:22084208-22085357:-	Ecsit	0.0843454	0.0614386	6.7297
ENSMUSG00000060288;AL:4:119300010:119300183-119310759:119307160:119307883-119310759:-	Ppih	0.0841631	0.0929071	8.12182
ENSMUSG00000019975;AL:10:91093256-91095784:91098657:91093256-91101755:91102607:+	Ikbip	-0.084158	0.0584416	39.5131
ENSMUSG00000061028;A5:7:19584530-19584780:19584530-19584784:-	Clasrp	0.0840992	0.0795455	5.00485
ENSMUSG00000039844;SE:2:29707400-29710156:29710308-29722224:+	Rapgef1	0.0839253	0.0569431	12.4257
ENSMUSG00000030611;A5:7:78783686-78788675:78783680-78788675:+	Mrps11	0.0837552	0.0224775	3.37054
ENSMUSG00000032112;A5:9:44406978-44407127:44406978-44407285:-	Trappc4	-0.0836576	0.0539461	6.25623
ENSMUSG00000025137;A3:11:120613083-120613379:120612601-120613379:-	Pcyt2	0.0835977	0.0839161	1.51714
ENSMUSG00000001472;AL:8:123400697-123401076:123401892:123400697-123403150:123403835:+	Tcf25	-0.0834966	0.0703582	16.4628
ENSMUSG00000034247;SE:11:103380352-103386958:103387348-103394688:-	Plekhm1	0.0832641	0.0709291	7.14344
ENSMUSG00000056204;AF:8:70657480-70658778:70658912:70657480-70659610:70659738:-	Pgpep1	-0.0828467	0.0769231	2.48936
ENSMUSG00000020864;A3:11:94338521-94339553:94338521-94339633:+	Ankrd40	0.0824739	0.025974	19.723
ENSMUSG00000097195;RI:9:88521918:88521975-88522307:88522381:-	Snhg5	0.0824704	0.023976	6.09887
ENSMUSG00000036860;A3:11:59202659-59204172:59202659-59204175:+	Mrpl55	0.0823411	0.0899101	6.84602
ENSMUSG00000037239;AF:7:29167973-29168520:29168647:29167973-29169433:29169841:-	Spred3	-0.0823234	0.0374625	13.1628
ENSMUSG00000037239;RI:7:29166527:29166695-29167793:29167973:-	Spred3	0.0823234	0.0374625	3.85014
ENSMUSG00000001472;AL:8:123400697-123401076:123401231:123400697-123403147:123403806:+	Tcf25	-0.0821321	0.0481185	14.018
ENSMUSG00000020271;MX:11:32642935-32680201:32680302-32711772:32642935-32708188:32708250-32711772:+	Fbxw11	0.0819371	0.0719281	18.211
ENSMUSG00000008398;SE:10:93254811-93264880:93265680-93284769:-	Elk3	-0.0817376	0.037962	32.2606
ENSMUSG00000024142;A3:17:24478483-24479012:24478478-24479012:-	Mlst8	0.0816831	0.0669331	1.59173
ENSMUSG00000056870;SE:1:44689215-44708617:44708678-44744474:+	Gulp1	-0.0816352	0.0704296	8.59466
ENSMUSG00000026956;A3:2:25363857-25364101:25363829-25364101:-	Uap1l1	-0.0816346	0.0704296	22.4146
ENSMUSG00000015165;AF:7:28808808:28808859-28813279:28810890:28811168-28813279:+	Hnrnpl	-0.0816117	0.0535714	24.1862
ENSMUSG00000025001;AF:19:38930915:38931075-38931391:38931174:38931218-38931391:+	Hells	0.0813791	0.0699301	7.94372
ENSMUSG00000060681;A5:X:56620525-56622611:56620429-56622611:+	Slc9a6	-0.0813424	0.0949051	4.01911
ENSMUSG00000069895;SE:8:109735363-109735460:109735525-109737631:-	Atxn1l	-0.0813269	0.0404595	3.05103
ENSMUSG00000031367;AL:X:163917843-163926903:163929546:163917843-163932133:163933359:+	Ap1s2	0.0812199	0.0659341	35.3766
ENSMUSG00000041638;A3:5:115614600-115614861:115614600-115614864:+	Gcn1l1	-0.0810617	0.0674326	19.7758
ENSMUSG00000007888;SE:8:70493400-70498597:70498878-70499093:+	Crlf1	-0.0809788	0.018981	124.97
ENSMUSG00000029050;AF:4:155160956-155188257:155188296:155160956-155221552:155222592:-	Ski	0.0809642	0.0184815	3.84935
ENSMUSG00000026095;A5:1:53346761-53347015:53346761-53348446:-	Asnsd1	-0.0809443	0.035964	27.8283
ENSMUSG00000028437;MX:4:41371849-41378947:41379870-41388096:41371849-41387175:41387357-41388096:+	Ubap1	-0.080877	0.0764236	14.9196
ENSMUSG00000030672;AF:7:127211608:127211763-127212861:127212679:127212707-127212861:+	Mylpf	0.0803934	0.0749251	10.988
ENSMUSG00000040652;RI:9:65686196:65686271-65686273:65686353:+	Oaz2	-0.0803901	0.0809191	3.77816
ENSMUSG00000031565;AF:8:25518789:25519429-25532250:25532125:25532161-25532250:+	Fgfr1	0.0803402	0.0917083	37.3512
ENSMUSG00000041189;SE:11:69795013-69795595:69795734-69795822:-	Chrnb1	-0.080285	0.0494505	9.75204
ENSMUSG00000028936;AF:4:152325867:152325895-152327481:152327067:152327359-152327481:+	Rpl22	-0.080222	0.0974026	9.57542
ENSMUSG00000033542;RI:6:43283893:43284054-43285359:43285429:+	Arhgef5	0.0796851	0.0789211	3.11396
ENSMUSG00000026127;RI:1:34443769:34443923-34443997:34444091:+	Imp4	0.0796207	0.0889111	1.14876
ENSMUSG00000040842;SE:4:141118781-141120324:141120373-141139692:-	Szrd1	-0.0791825	0.0924076	14.9823
ENSMUSG00000024101;A5:17:66111731-66113863:66111649-66113863:+	Wash1	0.079093	0.044955	5.87575
ENSMUSG00000018474;SE:11:69348521-69348710:69348811-69348921:-	Chd3	-0.0788966	0.0999001	24.348
ENSMUSG00000031103;AF:X:48424354-48453872:48454169:48424354-48463073:48463132:-	Elf4	-0.0787048	0.0559441	5.52613
ENSMUSG00000009772;SE:1:132325073-132326206:132326229-132327697:+	Nuak2	0.0783238	0.0444555	2.87135
ENSMUSG00000110040;SE:7:142371310-142376601:142376738-142376833:-	RP23-145I16.3	-0.0782881	0.0674326	6.76675
ENSMUSG00000008140;SE:7:44490970-44491163:44491249-44491955:-	Emc10	-0.0782673	0.0524476	24.403
ENSMUSG00000026753;AF:2:39211053-39225808:39226032:39211053-39226167:39226282:-	Ppp6c	-0.0781937	0.0657676	15.9486
ENSMUSG00000018999;SE:6:34170574-34172628:34172755-34176778:-	Slc35b4	-0.0781727	0.0849151	3.6733
ENSMUSG00000061028;RI:7:19591993:19592077-19594473:19594552:-	Clasrp	0.0779858	0.0792208	1.82049
ENSMUSG00000021669;SE:13:96616549-96616994:96617071-96624695:+	Col4a3bp	0.0778384	0.0344655	8.94854
ENSMUSG00000078606;AL:7:105895139:105903847-105953855:105927032:105927290-105953855:-	Gm4070	-0.0775867	0.0959041	8.92796
ENSMUSG00000030774;AF:7:97788541:97788974-97854436:97842935:97843141-97854436:+	Pak1	-0.0775147	0.0394605	3.87445
ENSMUSG00000047824;AF:3:89430261:89430729-89431127:89430837:89431018-89431127:+	Pygo2	-0.0774582	0.0874126	32.5654
ENSMUSG00000027122;AF:2:106969558-106970311:106970391:106969558-106974272:106974397:-	Arl14ep	-0.0773413	0.0964036	5.41666
ENSMUSG00000032050;AF:9:52047173:52047235-52060832:52048115:52048432-52060832:+	Rdx	0.0773407	0.040959	21.1407
ENSMUSG00000050088;A3:17:14943319-14943567:14943319-14943572:+	1600012H06Rik	0.0773097	0.0689311	9.19812
ENSMUSG00000041431;SE:13:100779785-100780022:100780132-100780776:-	Ccnb1	0.0772989	0.038961	11.878
ENSMUSG00000023150;A3:1:151354759-151355167:151354759-151356129:+	Ivns1abp	0.0772225	0.037962	4.67821
ENSMUSG00000002413;SE:6:39644380-39646725:39646844-39648450:-	Braf	-0.0770957	0.0834166	3.93553
ENSMUSG00000002413;SE:6:39648486-39648821:39648856-39651605:-	Braf	-0.0770957	0.0834166	3.93553
ENSMUSG00000002413;RI:6:39677378:39677472-39677572:39677641:-	Braf	0.0770957	0.0834166	3.33232
ENSMUSG00000037211;A5:3:37640105-37640520:37640064-37640520:+	Spry1	-0.0768093	0.031968	16.8868
ENSMUSG00000025137;SE:11:120612601-120612846:120613083-120613379:-	Pcyt2	0.0766919	0.0839161	1.60673
ENSMUSG00000034403;A3:X:99467582-99468123:99467573-99468123:-	Pja1	0.0765072	0.0414585	9.01423
ENSMUSG00000040423;A3:1:160963840-160964950:160963840-160964977:+	Rc3h1	-0.076436	0.0799201	6.38411
ENSMUSG00000027639;AL:2:157097533:157099503-157101721:157101360:157101443-157101721:-	Samhd1	0.0759188	0.0836663	20.3139
ENSMUSG00000036606;RI:15:89155549:89156177-89156256:89156385:-	Plxnb2	-0.0758356	0.016983	46.1827
ENSMUSG00000058558;AF:5:107900502:107900646-107901870:107900874:107901071-107901870:+	Rpl5	0.075675	0.044955	43.8188
ENSMUSG00000029577;A5:5:114401441-114402522:114401437-114402522:+	Ube3b	0.0756626	0.048951	7.5887
ENSMUSG00000029577;A5:5:114404715-114406172:114404711-114406172:+	Ube3b	0.0756626	0.048951	7.5887
ENSMUSG00000052337;SE:6:71852867-71853173:71853268-71856912:+	Immt	-0.0756487	0.056044	17.1168
ENSMUSG00000038845;AF:11:95667010:95667042-95668037:95667064:95667139-95668037:+	Phb	0.0755155	0.0364635	0.399281
ENSMUSG00000001472;AL:8:123400697-123401076:123401231:123400697-123403150:123403403:+	Tcf25	-0.0752007	0.0704795	14.018
ENSMUSG00000034403;A3:X:99468600-99470617:99468314-99470617:-	Pja1	-0.0751088	0.034965	7.13007
ENSMUSG00000024240;AF:18:6462991-6490463:6490856:6462991-6515865:6516108:-	Epc1	-0.0746878	0.0854146	6.42437
ENSMUSG00000036748;SE:19:46332701-46338313:46338420-46338569:-	Cuedc2	-0.0746625	0.0224775	9.37498
ENSMUSG00000039199;A3:8:105473299-105473484:105473240-105473484:-	Zdhhc1	-0.0746093	0.0804196	3.45337
ENSMUSG00000039199;SE:8:105476529-105476614:105476738-105477017:-	Zdhhc1	-0.0746093	0.0804196	3.45337
ENSMUSG00000031565;A5:8:25557820-25558071:25557814-25558071:+	Fgfr1	0.0745746	0.0917083	11.4536
ENSMUSG00000006728;SE:10:127063759-127064202:127064453-127064585:+	Cdk4	-0.0745483	0.0809191	109.308
ENSMUSG00000035443;SE:9:27006447-27006801:27006951-27007158:+	Thyn1	-0.0744113	0.0464535	20.9749
ENSMUSG00000040028;AF:8:4311786-4312557:4312619:4311786-4324886:4325413:-	Elavl1	0.0742847	0.035964	43.7893
ENSMUSG00000031901;SE:8:106030443-106031698:106031741-106033723:+	Dus2	-0.0740487	0.0974026	5.27581
ENSMUSG00000037805;RI:17:28328967:28329280-28329374:28329522:+	Rpl10a	0.0740483	0.0464535	25.7891
ENSMUSG00000015357;SE:9:65310311-65312098:65312139-65316644:+	Clpx	-0.0738351	0.040959	13.2311
ENSMUSG00000029064;AF:4:155491364:155491580-155527413:155522462:155522658-155527413:+	Gnb1	0.0737669	0.0506993	123.427
ENSMUSG00000022706;A3:16:18875436-18876471:18875407-18876471:-	Mrpl40	-0.0731981	0.0324675	13.1463
ENSMUSG00000027665;A5:3:32436557-32437118:32436415-32437118:+	Pik3ca	-0.0731945	0.0484515	6.32664
ENSMUSG00000037664;A3:7:143460716-143460853:143460678-143460853:-	Cdkn1c	0.0731421	0.035964	27.4176
ENSMUSG00000031832;A5:8:119601780-119602758:119601780-119602831:-	Taf1c	0.0730811	0.0824176	0.966793
ENSMUSG00000020875;A5:11:96272058-96274624:96271819-96274624:+	Hoxb9	-0.0727181	0.023976	34.653
ENSMUSG00000028729;A5:4:118621240-118621361:118621165-118621361:+	Ebna1bp2	-0.0719179	0.0254745	7.93112
ENSMUSG00000005312;SE:13:58179668-58180822:58180905-58183182:-	Ubqln1	-0.0718622	0.0174825	43.6296
ENSMUSG00000024908;SE:19:3473866-3478278:3478364-3484831:-	Ppp6r3	0.0717095	0.0584416	17.5686
ENSMUSG00000056204;AF:8:70657480-70659610:70659651:70657480-70660301:70660388:-	Pgpep1	-0.0715842	0.0974026	10.1461
ENSMUSG00000055917;SE:12:40378874-40410576:40410953-40445666:-	Zfp277	-0.0715211	0.0614386	4.19852
ENSMUSG00000001472;AL:8:123400697-123401076:123401892:123400697-123403150:123403403:+	Tcf25	-0.0712138	0.0764236	16.4628
ENSMUSG00000027490;A5:2:154564508-154569067:154564508-154569489:-	E2f1	-0.0711422	0.0344655	12.2871
ENSMUSG00000001065;A3:8:123265431-123267505:123265431-123267600:+	Zfp276	0.0708148	0.0879121	1.84258
ENSMUSG00000009079;AF:11:5078952-5079485:5079899:5078952-5082253:5082340:-	Ewsr1	0.0704124	0.0929071	25.5988
ENSMUSG00000053436;AF:17:28691342:28691855-28713774:28692568:28692682-28713774:+	Mapk14	-0.0704119	0.0614386	13.3001
ENSMUSG00000020911;AF:11:100142508-100143666:100143699:100142508-100145431:100146120:-	Krt19	0.0700717	0.0214785	18.2978
ENSMUSG00000035478;RI:10:80392539:80393018-80393095:80393280:-	Mbd3	0.0700645	0.0434565	31.5758
ENSMUSG00000037013;SE:18:14636618-14637392:14637484-14640257:-	Ss18	0.0698985	0.0559441	4.7821
ENSMUSG00000020646;SE:12:24882794-24924199:24924294-24934567:+	Mboat2	0.0698506	0.0444555	15.7237
ENSMUSG00000020271;SE:11:32680302-32708188:32708250-32711772:+	Fbxw11	-0.0698022	0.0979021	3.59527
ENSMUSG00000024146;A5:17:87025675-87027699:87025653-87027699:+	Cript	0.0696588	0.0519481	49.6948
ENSMUSG00000056204;AF:8:70657480-70659610:70659738:70657480-70660301:70660388:-	Pgpep1	-0.0696007	0.0974026	10.5427
ENSMUSG00000027082;AF:2:84473799-84473943:84474174:84473799-84476691:84476763:-	Tfpi	-0.0695515	0.0879121	20.559
ENSMUSG00000026761;A3:2:48910294-48912562:48910242-48912562:-	Orc4	0.0693781	0.0849151	11.3974
ENSMUSG00000061028;RI:7:19584470:19584530-19584780:19584823:-	Clasrp	0.0692287	0.0795455	3.45352
ENSMUSG00000038740;AF:2:33874460-33886786:33886845:33874460-33887320:33887482:-	Mvb12b	-0.0690786	0.0644356	3.64389
ENSMUSG00000022761;RI:16:17525423:17525503-17525677:17526331:+	Lztr1	0.0686879	0.0959041	4.16552
ENSMUSG00000040365;SE:11:48809280-48812300:48812395-48815843:-	Trim41	0.068619	0.045954	8.73348
ENSMUSG00000051343;SE:6:85337670-85340343:85342361-85347780:-	Rab11fip5	-0.0684177	0.027972	10.0833
ENSMUSG00000021608;SE:13:73467517-73484261:73484403-73488887:+	Lpcat1	-0.068256	0.0804196	5.4535
ENSMUSG00000047648;AF:10:11281330:11281500-11289520:11281587:11281723-11289520:+	Fbxo30	0.0680464	0.040959	10.188
ENSMUSG00000020814;A5:11:116807968-116810780:116807968-116810788:-	Mxra7	0.0680442	0.02997	11.2236
ENSMUSG00000026277;SE:1:93624624-93625034:93625148-93625461:-	Stk25	-0.067949	0.0714286	19.2873
ENSMUSG00000027082;A3:2:84443312-84444010:84442925-84444010:-	Tfpi	-0.0678146	0.0879121	6.21092
ENSMUSG00000052337;A3:6:71851880-71852730:71851880-71852763:+	Immt	-0.0676827	0.056044	17.0945
ENSMUSG00000007850;SE:11:50384736-50385141:50385190-50385777:+	Hnrnph1	-0.0673833	0.0599401	21.1598
ENSMUSG00000040713;AF:1:165763746:165764138-165769813:165769476:165769520-165769813:+	Creg1	-0.0673466	0.0629371	23.002
ENSMUSG00000048458;AF:3:105704599:105704825-105716369:105705458:105705537-105716369:+	Fam212b	0.0671323	0.047952	8.21033
ENSMUSG00000027750;SE:3:54384573-54385208:54385285-54389339:+	Postn	-0.067036	0.0352148	18.1567
ENSMUSG00000047731;AF:19:46599084:46599293-46644353:46623401:46623579-46644353:+	Wbp1l	0.0669416	0.0936563	7.29751
ENSMUSG00000048439;SE:5:24169390-24175454:24175530-24178000:+	Nupl2	-0.0665779	0.0719281	5.9899
ENSMUSG00000019710;A5:3:87919828-87921817:87919651-87921817:+	Mrpl24	0.0664457	0.0807526	19.8072
ENSMUSG00000027639;SE:2:157099503-157101321:157101443-157101721:-	Samhd1	-0.0664021	0.0836663	10.7768
ENSMUSG00000024608;AF:18:60774666:60774686-60776401:60775229:60775317-60776401:+	Rps14	-0.066157	0.0979021	4.9734
ENSMUSG00000007783;A3:7:44961009-44961519:44960910-44961519:-	Cpt1c	0.0661387	0.0861638	3.97485
ENSMUSG00000007783;RI:7:44965084:44965266-44965371:44965566:-	Cpt1c	0.0661387	0.0861638	3.97485
ENSMUSG00000057738;SE:2:30013838-30014158:30014172-30015589:+	Sptan1	0.0660475	0.0949051	4.7351
ENSMUSG00000026277;AF:1:93624624-93625034:93625361:93624624-93625461:93625788:-	Stk25	-0.065575	0.0714286	9.96398
ENSMUSG00000032002;AL:9:7205400-7206073:7206489:7205400-7206720:7208205:+	Dcun1d5	0.0654729	0.0696803	9.69812
ENSMUSG00000032332;A3:9:79601179-79602200:79600007-79602200:-	Col12a1	-0.0650716	0.0214785	84.3185
ENSMUSG00000015165;AF:7:28808806:28808859-28813279:28810937:28811168-28813279:+	Hnrnpl	0.0649599	0.0692641	7.9935
ENSMUSG00000060152;SE:5:115238069-115238135:115238277-115240162:+	Pop5	-0.0647277	0.0809191	5.86027
ENSMUSG00000026748;SE:2:16669904-16703317:16703377-16712082:+	Plxdc2	-0.0645912	0.0609391	20.2076
ENSMUSG00000002885;SE:8:83729525-83730111:83730257-83733414:-	Adgre5	0.064494	0.0999001	26.3427
ENSMUSG00000041483;A3:1:136625051-136625268:136625051-136625272:+	Zfp281	-0.0643734	0.0724276	3.88173
ENSMUSG00000034449;A3:11:84825577-84828751:84825521-84828751:-	Dhrs11	-0.06427	0.0724276	9.29163
ENSMUSG00000032006;SE:9:6337441-6359703:6359917-6376895:+	Pdgfd	-0.0639853	0.0849151	7.90443
ENSMUSG00000035597;A3:12:65055764-65056251:65055764-65056305:+	Prpf39	-0.0636813	0.0719281	7.76015
ENSMUSG00000035597;SE:12:65055320-65055434:65055533-65055638:+	Prpf39	0.0636813	0.0719281	5.74259
ENSMUSG00000026643;SE:2:3305439-3306983:3307032-3309467:+	Nmt2	0.0635606	0.0969031	14.8932
ENSMUSG00000052337;SE:6:71863270-71866726:71866740-71868580:+	Immt	-0.0631218	0.056044	7.42904
ENSMUSG00000004771;SE:9:64726817-64728234:64728429-64737584:-	Rab11a	0.0629028	0.0549451	44.3269
ENSMUSG00000056131;SE:9:86556365-86557503:86557625-86558395:-	Pgm3	0.0628507	0.0599401	6.36677
ENSMUSG00000003402;A5:9:22011596-22011674:22011575-22011674:+	Prkcsh	-0.0627325	0.031968	67.9089
ENSMUSG00000032018;SE:9:42259899-42262051:42262131-42264206:-	Sc5d	-0.0625458	0.0669331	12.2284
ENSMUSG00000010914;SE:2:103046821-103058497:103058577-103073290:-	Pdhx	0.0622298	0.0679321	6.34629
ENSMUSG00000063576;SE:17:46678493-46679042:46679194-46680702:-	Klhdc3	-0.061799	0.027972	35.2473
ENSMUSG00000039218;A3:17:23821690-23821921:23821690-23822413:+	Srrm2	0.0616656	0.0569431	5.7396
ENSMUSG00000031278;A3:X:142351618-142360387:142351615-142360387:-	Acsl4	-0.0614413	0.0849151	16.053
ENSMUSG00000002052;SE:11:78220090-78220597:78220747-78221121:-	Supt6	0.0613053	0.0404595	4.04785
ENSMUSG00000050088;A3:17:14943319-14943502:14943319-14943567:+	1600012H06Rik	-0.0612512	0.0689311	10.7639
ENSMUSG00000026761;A3:2:48910245-48912562:48910242-48912562:-	Orc4	-0.0609842	0.0849151	17.3084
ENSMUSG00000025423;AF:18:77065208:77065419-77097249:77065680:77065907-77097249:+	Pias2	0.0609827	0.0599401	12.1325
ENSMUSG00000059263;SE:7:112077959-112080172:112080231-112082430:+	Usp47	-0.0609487	0.0789211	21.5091
ENSMUSG00000044573;MX:12:30897806-30904718:30904831-30905069:30897806-30904870:30904983-30905069:-	Acp1	-0.0607027	0.043956	14.4662
ENSMUSG00000007850;A5:11:50383920-50384644:50383890-50384644:+	Hnrnph1	-0.0604674	0.0599401	15.5806
ENSMUSG00000025137;RI:11:120612001:120612083-120612463:120612601:-	Pcyt2	0.0603872	0.0839161	6.69371
ENSMUSG00000078881;A5:2:176483212-176486670:176483212-176486698:-	Gm14434	-0.0603777	0.0694306	12.8206
ENSMUSG00000040396;SE:8:9978019-9982864:9982970-9987385:+	Abhd13	-0.0602886	0.0769231	3.2537
ENSMUSG00000008683;A5:7:118115246-118115740:118115246-118116097:-	Rps15a	-0.0601328	0.0854146	4.08202
ENSMUSG00000025940;A3:1:16665505-16667665:16665505-16667668:+	Tmem70	0.0600516	0.0509491	14.0311
ENSMUSG00000029713;AF:5:137530840-137530975:137531038:137530840-137531607:137531758:-	Gnb2	-0.0599267	0.0607393	19.553
ENSMUSG00000033467;A3:5:109555660-109556019:109555627-109556019:-	Crlf2	0.0598334	0.0674326	4.38515
ENSMUSG00000029518;A3:5:115637766-115640080:115637766-115640084:+	Rab35	0.0596858	0.034965	35.1864
ENSMUSG00000039182;A5:13:14630364-14636300:14630284-14636300:+	AW209491	0.0595666	0.0714286	7.63591
ENSMUSG00000015143;MX:12:80169016-80170183:80170248-80171729:80169016-80170686:80170766-80171729:-	Actn1	-0.0594795	0.0134865	359.997
ENSMUSG00000043866;RI:7:105743226:105743340-105743428:105743492:-	Taf10	-0.059464	0.0234765	37.9373
ENSMUSG00000025402;SE:10:127661779-127662731:127662922-127663132:-	Nab2	-0.0594375	0.0869131	45.3286
ENSMUSG00000039262;A3:2:32218759-32219214:32218759-32219217:+	Prrc2b	-0.0591699	0.0909091	12.826
ENSMUSG00000046711;A5:17:27556749-27559533:27556711-27559533:+	Hmga1	-0.0588981	0.020979	83.0755
ENSMUSG00000020628;A5:12:28747536-28750162:28747536-28750329:-	Trappc12	0.0588778	0.0999001	1.79591
ENSMUSG00000039208;AF:11:121701544:121701648-121707730:121702411:121702795-121707730:+	Metrnl	0.0587171	0.0974026	2.37834
ENSMUSG00000047126;SE:11:86697340-86701061:86701081-86702209:-	Cltc	0.0585646	0.040959	20.1571
ENSMUSG00000030530;AF:7:80398928-80402530:80402762:80398928-80405319:80405431:-	Furin	0.0584284	0.0715951	81.0579
ENSMUSG00000012405;A5:14:18270460-18270823:18270460-18270959:-	Rpl15	-0.058361	0.0689311	133.927
ENSMUSG00000020680;RI:11:83504642:83504710-83504831:83505104:+	Taf15	-0.0583098	0.031968	40.1162
ENSMUSG00000040123;AF:14:56810859-56811334:56811464:56810859-56811592:56811716:-	Zmym5	-0.0582438	0.0739261	10.3356
ENSMUSG00000019194;RI:7:31116524:31117136-31117224:31117295:-	Scn1b	0.0581182	0.031968	8.79816
ENSMUSG00000064030;AF:10:128747879:128747998-128765147:128748455:128748566-128765147:+	Pym1	0.0580875	0.0579421	9.84391
ENSMUSG00000026753;SE:2:39204974-39206652:39206717-39210958:-	Ppp6c	0.0579848	0.0657676	13.2168
ENSMUSG00000031278;A3:X:142351908-142360387:142351618-142360387:-	Acsl4	-0.057925	0.0849151	1.63669
ENSMUSG00000085438;A5:2:119596511-119599588:119596342-119599588:+	1700020I14Rik	-0.0578046	0.0564436	10.3972
ENSMUSG00000047260;A5:11:73176751-73176856:73176751-73176939:-	Emc6	-0.0575978	0.0274725	20.5405
ENSMUSG00000002105;AF:2:91068739-91068821:91068871:91068739-91070155:91070417:-	Slc39a13	0.0571926	0.035298	12.8183
ENSMUSG00000000581;AF:11:17257579:17257658-17262648:17257688:17258007-17262648:+	C1d	-0.0567571	0.0899101	21.4225
ENSMUSG00000060950;RI:12:111678105:111678300-111678603:111678962:+	Trmt61a	0.0566545	0.0764236	11.3908
ENSMUSG00000015165;AF:7:28809518:28809549-28813279:28810890:28811168-28813279:+	Hnrnpl	-0.0566327	0.0692641	7.08738
ENSMUSG00000026753;SE:2:39200121-39204833:39204974-39210958:-	Ppp6c	-0.0565348	0.0749251	25.1005
ENSMUSG00000000581;AF:11:17257594:17257658-17262648:17257688:17258007-17262648:+	C1d	-0.0563643	0.0899101	16.4445
ENSMUSG00000037570;SE:15:99250014-99250463:99250582-99251862:-	Mcrs1	-0.0563535	0.0484515	17.6605
ENSMUSG00000037410;AF:9:90249944-90255850:90255927:90249944-90270352:90270769:-	Tbc1d2b	0.05627	0.0999001	0.395106
ENSMUSG00000046711;A5:17:27557066-27559533:27556749-27559533:+	Hmga1	-0.0559178	0.020979	46.2128
ENSMUSG00000034681;SE:17:24414734-24418038:24418218-24418457:+	Rnps1	-0.0557937	0.0709291	19.2782
ENSMUSG00000022464;AF:15:97019861-97020303:97020322:97019861-97055855:97055956:-	Slc38a4	-0.0557098	0.032967	37.6524
ENSMUSG00000026956;A5:2:25362137-25362650:25362137-25362663:-	Uap1l1	0.0555536	0.0704296	5.60326
ENSMUSG00000040158;A3:11:73180508-73180731:73180508-73181088:+	Tax1bp3	0.0554565	0.0754246	0.423659
ENSMUSG00000020184;SE:10:117695068-117695953:117696049-117696381:-	Mdm2	-0.0553355	0.0849151	63.0575
ENSMUSG00000029551;A5:5:139826364-139826722:139826364-139826809:-	Psmg3	-0.0552703	0.0614386	20.5224
ENSMUSG00000030397;SE:7:19451756-19457066:19457099-19458444:-	Mark4	0.0550965	0.0959041	20.0935
ENSMUSG00000035863;SE:10:79815241-79816792:79816923-79819041:+	Palm	0.0548436	0.0394605	32.1841
ENSMUSG00000045284;A5:X:44788293-44788391:44788293-44788413:-	Dcaf12l1	-0.05477	0.0524476	7.56377
ENSMUSG00000022297;A5:15:39006489-39007225:39006432-39007225:+	Fzd6	0.0547529	0.0984016	1.70179
ENSMUSG00000032875;AF:7:100890498-100894443:100894690:100890498-100928569:100932107:-	Arhgef17	0.0546623	0.0999001	20.332
ENSMUSG00000024750;AF:19:21272278:21272742-21276426:21273246:21273335-21276426:+	Zfand5	0.0545798	0.0636863	44.1889
ENSMUSG00000020832;RI:11:78074280:78074360-78074478:78074627:-	Eral1	0.0544855	0.0969031	2.05891
ENSMUSG00000007888;SE:8:70503492-70503597:70503639-70503821:+	Crlf1	-0.0544463	0.0234765	124.97
ENSMUSG00000040212;SE:7:45920037-45920289:45920404-45921242:-	Emp3	-0.0544167	0.0939061	123.45
ENSMUSG00000056204;SE:8:70651414-70652405:70652521-70657428:-	Pgpep1	-0.05437	0.0974026	3.38095
ENSMUSG00000066415;SE:9:101075420-101075880:101075956-101100571:+	Msl2	-0.0542974	0.0899101	2.4722
ENSMUSG00000006728;MX:10:127063759-127064220:127064453-127064835:127063759-127064585:127064720-127064835:+	Cdk4	-0.0542545	0.0809191	129.982
ENSMUSG00000053838;SE:11:6113431-6125418:6125561-6150495:-	Nudcd3	0.0537836	0.0769231	12.959
ENSMUSG00000040652;RI:9:65686196:65686268-65686273:65686353:+	Oaz2	0.0537595	0.0999001	3.77816
ENSMUSG00000071451;SE:13:34163249-34166061:34166136-34177981:+	Psmg4	-0.0536225	0.0709291	12.1566
ENSMUSG00000027122;AF:2:106969558-106970311:106970391:106969558-106974272:106974424:-	Arl14ep	-0.05329	0.0964036	5.41666
ENSMUSG00000043510;A5:5:110834799-110835975:110834799-110835980:-	Hscb	-0.0528907	0.0749251	1.50828
ENSMUSG00000031168;A5:X:8190436-8192801:8190436-8193297:-	Ebp	0.0526674	0.0764236	14.7077
ENSMUSG00000032018;AF:9:42262131-42264122:42264200:42262131-42264206:42264256:-	Sc5d	-0.0526291	0.0669331	25.6738
ENSMUSG00000036391;A3:11:51729578-51731803:51729575-51731803:-	Sec24a	0.0523891	0.0739261	4.06991
ENSMUSG00000038544;SE:4:59775549-59782254:59782334-59783728:-	Inip	0.0519665	0.0904096	4.57425
ENSMUSG00000026193;RI:1:71597281:71597387-71597642:71597747:-	Fn1	-0.0518544	0.0478807	461.448
ENSMUSG00000027646;A3:2:157455767-157457077:157455767-157457081:+	Src	-0.051792	0.0905761	9.64414
ENSMUSG00000045374;SE:11:75442089-75444255:75444434-75444698:-	Wdr81	-0.0511541	0.0654346	6.94517
ENSMUSG00000031226;AL:X:105082805-105083016:105085186:105082805-105116314:105117090:+	Pbdc1	-0.0510013	0.0579421	18.15
ENSMUSG00000028426;A5:4:55350427-55366777:55350250-55366777:+	Rad23b	0.0508993	0.0549451	63.175
ENSMUSG00000059005;A5:2:75659389-75661466:75659323-75661466:+	Hnrnpa3	-0.0505482	0.030969	23.8576
ENSMUSG00000012405;A5:14:18270460-18270845:18270460-18270959:-	Rpl15	-0.0505015	0.0839161	292.3
ENSMUSG00000025979;SE:1:55131359-55136677:55136739-55145124:+	Mob4	0.0504612	0.0819181	12.6587
ENSMUSG00000004980;AL:6:51460932:51461433-51463411:51462760:51463254-51463411:-	Hnrnpa2b1	0.05041	0.0829171	155.024
ENSMUSG00000030978;A3:7:102465813-102466864:102465813-102466878:+	Rrm1	0.0503671	0.0859141	5.40351
ENSMUSG00000063801;SE:7:79916107-79917231:79917322-79920509:-	Ap3s2	-0.0502384	0.0814186	4.06702
ENSMUSG00000032002;AL:9:7203555-7205298:7205639:7203555-7206720:7207040:+	Dcun1d5	0.0501285	0.0696803	3.12049
ENSMUSG00000026502;SE:1:178187957-178198218:178198290-178237912:+	Desi2	-0.0497991	0.0804196	10.8882
ENSMUSG00000049396;AL:11:76210571:76213923-76217478:76217079:76217272-76217478:-	Gemin4	-0.0496953	0.0929071	13.4366
ENSMUSG00000053253;A3:14:105304836-105307886:105304836-105308116:+	Ndfip2	-0.0496796	0.043956	17.8013
ENSMUSG00000024393;A3:17:35150905-35152618:35150902-35152618:-	Prrc2a	-0.0496759	0.0384615	62.5926
ENSMUSG00000012422;A3:13:90100942-90103288:90100942-90104375:+	Tmem167	-0.049019	0.0684316	4.81637
ENSMUSG00000053929;AL:15:76643395:76646574-76648099:76646927:76647768-76648099:-	Cyhr1	0.0489761	0.0919081	18.5286
ENSMUSG00000021835;SE:14:46386094-46387156:46387280-46390304:-	Bmp4	-0.0489596	0.0509491	20.7403
ENSMUSG00000057789;A3:17:27022877-27025793:27022872-27025793:-	Bak1	-0.0488685	0.0869131	35.9359
ENSMUSG00000003731;AF:4:129661439-129662400:129662479:129661439-129672677:129672767:-	Kpna6	0.0487783	0.0816683	2.76334
ENSMUSG00000035559;SE:8:70759467-70760093:70760253-70760368:-	Mpv17l2	0.0486959	0.0969031	7.4162
ENSMUSG00000027597;A3:2:155067398-155068828:155067362-155068828:-	Ahcy	0.0486581	0.0694306	42.8844
ENSMUSG00000015656;A3:9:40801348-40801918:40801348-40801989:+	Hspa8	0.0483666	0.0865801	295.714
ENSMUSG00000027806;SE:3:58417613-58428228:58428299-58459331:+	Tsc22d2	-0.0483108	0.0374625	12.1788
ENSMUSG00000007038;RI:17:34932566:34932828-34934003:34934185:+	Neu1	0.0482114	0.0669331	2.28621
ENSMUSG00000002059;SE:11:78188511-78189178:78189390-78189571:+	Rab34	-0.048177	0.0722611	82.0793
ENSMUSG00000033467;A3:5:109557749-109558805:109557614-109558805:-	Crlf2	0.0479849	0.0674326	5.28178
ENSMUSG00000028719;SE:4:114969364-114970464:114970502-114986966:-	Cmpk1	-0.0477439	0.0681818	3.57271
ENSMUSG00000074578;RI:2:167065159:167065217-167065434:167065480:+	Zfas1	0.0473976	0.0544456	10.8393
ENSMUSG00000042804;A3:4:152282555-152282858:152282555-152282927:+	Gpr153	0.0473116	0.0954046	3.84394
ENSMUSG00000006728;SE:10:127063759-127064220:127064453-127064585:+	Cdk4	-0.0472165	0.0809191	30.1411
ENSMUSG00000026193;A3:1:71597672-71598374:71597387-71598374:-	Fn1	-0.0471734	0.0478807	67.4591
ENSMUSG00000034595;AF:17:35865625:35865694-35867230:35866056:35866228-35867230:+	Ppp1r18	-0.0470131	0.0754246	6.21021
ENSMUSG00000026956;A3:2:25363999-25364101:25363829-25364101:-	Uap1l1	-0.0469595	0.0704296	32.3505
ENSMUSG00000034205;AF:14:69609068:69609294-69633884:69609478:69609566-69633884:+	Loxl2	-0.0469437	0.032967	417.631
ENSMUSG00000063802;A3:7:4684569-4684894:4684482-4684894:-	Hspbp1	-0.0466214	0.0925741	20.5749
ENSMUSG00000030105;AF:6:108783099:108783377-108813627:108794897:108794932-108813627:+	Arl8b	0.0464546	0.0454545	40.771
ENSMUSG00000028437;SE:4:41379870-41387175:41387357-41388096:+	Ubap1	0.0463368	0.0764236	16.5941
ENSMUSG00000002763;RI:17:46723674:46723735-46723919:46724027:+	Pex6	0.0463173	0.0939061	1.40183
ENSMUSG00000027108;AF:2:73203468-73212860:73212960:73203468-73214286:73214426:-	Ola1	0.0462979	0.0669331	6.23746
ENSMUSG00000026193;SE:1:71602497-71603660:71603929-71604970:-	Fn1	-0.0459917	0.0478807	221.732
ENSMUSG00000040158;SE:11:73180508-73180731:73180808-73181088:+	Tax1bp3	0.0458145	0.0609391	129.516
ENSMUSG00000038812;RI:19:6910584:6910673-6910752:6911028:+	Trmt112	0.0456916	0.0504496	6.04608
ENSMUSG00000091509;SE:14:105109802-105112319:105112402-105113469:-	Gm17066	-0.0452061	0.0904096	8.16118
ENSMUSG00000022816;AL:16:37777350-37793888:37794238:37777350-37798850:37799471:+	Fstl1	-0.0450924	0.0509491	17.0041
ENSMUSG00000034595;AF:17:35865593:35865694-35867230:35866056:35866228-35867230:+	Ppp1r18	0.0447107	0.0754246	2.30484
ENSMUSG00000063802;A3:7:4684569-4684894:4684566-4684894:-	Hspbp1	0.0446154	0.0925741	20.5749
ENSMUSG00000025283;A5:X:155214134-155215120:155214134-155215601:-	Sat1	0.0443244	0.0859141	26.1264
ENSMUSG00000031996;SE:9:31164673-31167561:31167728-31168708:-	Aplp2	0.0439663	0.0639361	41.8636
ENSMUSG00000027551;AL:2:168925361:168926933-168935211:168934813:168934939-168935211:-	Zfp64	0.0438192	0.0954046	14.0643
ENSMUSG00000032440;SE:9:116131713-116158271:116158345-116174944:-	Tgfbr2	0.0435402	0.0659341	11.0894
ENSMUSG00000071415;AF:11:97781889-97782003:97782276:97781889-97782344:97782437:-	Rpl23	-0.0434917	0.0519481	261.488
ENSMUSG00000031568;A3:8:47537359-47542692:47537359-47542696:+	Rwdd4a	0.0429484	0.0739261	11.3328
ENSMUSG00000028437;SE:4:41371849-41378947:41379870-41387175:+	Ubap1	-0.0426718	0.0764236	16.5941
ENSMUSG00000022634;SE:15:93286562-93317539:93317608-93336340:-	Yaf2	-0.0426021	0.0584416	9.85598
ENSMUSG00000021877;SE:14:26638486-26646659:26646739-26646914:+	Arf4	-0.0416859	0.0599401	207.014
ENSMUSG00000004980;SE:6:51464211-51464428:51464547-51465179:-	Hnrnpa2b1	-0.0415464	0.0829171	77.8808
ENSMUSG00000023106;AF:5:123907175:123907366-123908100:123907489:123907702-123908100:+	Denr	0.0412761	0.0846653	36.8208
ENSMUSG00000074578;RI:2:167065434:167065480-167065687:167065862:+	Zfas1	0.0412194	0.0544456	5.21443
ENSMUSG00000025870;AL:13:54578968-54579139:54579537:54578968-54580721:54581128:+	Arl10	0.0409758	0.0854146	2.27058
ENSMUSG00000019978;AF:10:25359798:25359981-25441573:25408368:25408442-25441573:+	Epb41l2	-0.0409445	0.0584416	41.6938
ENSMUSG00000053617;SE:19:47278430-47283021:47283104-47286605:-	Sh3pxd2a	-0.0409364	0.0794206	32.9482
ENSMUSG00000056692;A5:17:27753995-27767911:27753995-27768136:-	D17Wsu92e	-0.04087	0.048951	39.9632
ENSMUSG00000035898;AF:5:86170617-86172407:86172511:86170617-86172668:86172803:-	Uba6	0.0402947	0.0819181	1.24814
ENSMUSG00000070394;A5:11:69838649-69838920:69838573-69838920:+	Tmem256	0.0400508	0.0384615	42.2056
ENSMUSG00000020477;RI:11:5707298:5707409-5707487:5707555:-	Mrps24	0.0400325	0.0804196	6.44478
ENSMUSG00000030770;AF:7:112427706:112428100-112544177:112519701:112519828-112544177:+	Parva	-0.0399631	0.0679321	95.3161
ENSMUSG00000023106;AF:5:123907269:123907366-123908100:123907489:123907702-123908100:+	Denr	-0.0399464	0.0846653	3.04673
ENSMUSG00000000399;A3:6:126845029-126849064:126844961-126849064:-	Ndufa9	0.0392575	0.0629371	3.93041
ENSMUSG00000001472;SE:8:123381561-123382527:123382601-123383325:+	Tcf25	0.0390894	0.0704795	22.7901
ENSMUSG00000054716;AL:7:127245134-127245573:127245711:127245134-127253805:127254803:+	Zfp771	0.0389764	0.0794206	1.43088
ENSMUSG00000015165;AF:7:28808806:28808859-28813279:28810890:28811168-28813279:+	Hnrnpl	0.0387304	0.0852273	7.9935
ENSMUSG00000030189;SE:6:131370414-131375974:131376180-131379358:-	Ybx3	-0.0385928	0.033966	80.9879
ENSMUSG00000022536;A3:16:5021448-5026508:5021430-5026508:-	Glyr1	0.0384864	0.0754246	23.8426
ENSMUSG00000059208;RI:17:33666494:33666529-33666647:33666685:-	Hnrnpm	0.037947	0.0909091	13.9431
ENSMUSG00000035227;SE:7:99839883-99840692:99840824-99844700:-	Spcs2	0.0379349	0.0779221	16.6315
ENSMUSG00000027750;SE:3:54385285-54385671:54385754-54389339:+	Postn	0.0377619	0.0649351	6.11735
ENSMUSG00000026511;SE:1:182124975-182128684:182128752-182131336:+	Srp9	0.0376181	0.0464535	88.3099
ENSMUSG00000075486;SE:14:101637106-101640288:101640299-101640389:-	Commd6	-0.0375194	0.0799201	23.7069
ENSMUSG00000024608;AF:18:60775229:60775317-60776401:60775716:60775742-60776401:+	Rps14	0.0371522	0.0979021	14.8531
ENSMUSG00000040731;SE:5:134622086-134624441:134624500-134625366:-	Eif4h	0.036942	0.043956	55.1161
ENSMUSG00000056851;SE:15:102484240-102485948:102486040-102487088:+	Pcbp2	-0.0368985	0.0829171	44.0755
ENSMUSG00000062203;A3:16:11239099-11240666:11239096-11240666:-	Gspt1	-0.0368424	0.0504496	82.2667
ENSMUSG00000040028;AF:8:4311786-4312557:4312619:4311786-4324886:4325086:-	Elavl1	-0.0366235	0.0669331	43.7893
ENSMUSG00000071072;SE:10:128070232-128072068:128072157-128074222:+	Ptges3	0.0362738	0.042957	156.342
ENSMUSG00000031545;SE:8:23182963-23184529:23184598-23190716:-	Gpat4	0.0362267	0.0654346	18.2141
ENSMUSG00000059208;A3:17:33646745-33648813:33646659-33648813:-	Hnrnpm	0.035987	0.0909091	12.8626
ENSMUSG00000031955;AF:8:111721331-111732039:111732136:111721331-111743689:111743809:-	Bcar1	0.0359447	0.0879121	63.3612
ENSMUSG00000026956;SE:2:25364687-25364881:25365085-25365327:-	Uap1l1	0.0358608	0.0704296	32.3505
ENSMUSG00000006205;AF:7:130936203:130936743-130961513:130943489:130943594-130961513:+	Htra1	-0.0358448	0.0644356	73.2746
ENSMUSG00000024535;RI:18:53389517:53389612-53390392:53390823:+	Snx24	-0.0354333	0.0719281	41.1707
ENSMUSG00000026586;SE:1:163248396-163253977:163254048-163257761:-	Prrx1	-0.0353485	0.0624376	22.7279
ENSMUSG00000028822;A3:4:134913261-134914889:134913195-134914889:-	Tmem50a	-0.0352883	0.045954	19.1038
ENSMUSG00000027108;SE:2:73203468-73212860:73212960-73214286:-	Ola1	0.0350657	0.0669331	17.397
ENSMUSG00000020358;SE:11:51601478-51601750:51601890-51602593:-	Hnrnpab	-0.0349166	0.0609391	177.02
ENSMUSG00000029559;A5:5:114945907-114946018:114945828-114946018:+	2210016L21Rik	0.0348968	0.0999001	3.86675
ENSMUSG00000038400;SE:2:173234461-173271567:173271680-173276088:-	Pmepa1	0.0348721	0.045954	36.9485
ENSMUSG00000001349;AF:9:22099268:22099418-22101141:22100192:22100228-22101141:+	Cnn1	0.0346132	0.0879121	132.35
ENSMUSG00000056629;A3:19:6979177-6980394:6979141-6980394:-	Fkbp2	0.0342711	0.0639361	18.2638
ENSMUSG00000040462;SE:10:127096742-127096915:127097079-127097932:-	Os9	-0.0342123	0.0994006	3.83889
ENSMUSG00000020719;AF:11:106788459-106788699:106788883:106788459-106789016:106789185:-	Ddx5	0.0341241	0.0729271	16.6421
ENSMUSG00000028277;SE:4:33043986-33045080:33045199-33049682:+	Ube2j1	-0.0338563	0.0689311	44.9073
ENSMUSG00000031232;RI:X:105968084:105971026-105971436:105971479:-	Magt1	-0.0336935	0.0799201	33.4465
ENSMUSG00000062203;SE:16:11222753-11223212:11223301-11224420:-	Gspt1	-0.0336401	0.0504496	35.6059
ENSMUSG00000041453;A5:5:146833740-146834184:146833566-146834184:+	Rpl21	0.0335012	0.0811688	11.7925
ENSMUSG00000026956;A3:2:25363999-25364101:25363857-25364101:-	Uap1l1	0.0332454	0.0704296	32.3505
ENSMUSG00000026956;A5:2:25362848-25363244:25362848-25363312:-	Uap1l1	0.0332454	0.0704296	32.3505
ENSMUSG00000018340;SE:11:54986215-54987051:54987068-54991391:-	Anxa6	-0.0329294	0.025974	150.341
ENSMUSG00000026277;RI:1:93626051:93626208-93627025:93627133:-	Stk25	0.0329144	0.0714286	34.9406
ENSMUSG00000037905;SE:5:125451772-125452148:125452245-125454326:+	Bri3bp	0.0328605	0.0954046	23.8518
ENSMUSG00000028156;SE:3:138546427-138547659:138547754-138550263:+	Eif4e	-0.0326429	0.0524476	20.2872
ENSMUSG00000038900;A5:2:32961960-32962049:32961839-32962049:+	Rpl12	-0.0324744	0.0879121	25.5182
ENSMUSG00000001016;RI:3:90486851:90486912-90486983:90487097:+	Ilf2	0.0321748	0.0919081	7.1354
ENSMUSG00000035227;SE:7:99849059-99849157:99849252-99858764:-	Spcs2	0.0320688	0.0779221	52.6473
ENSMUSG00000028156;SE:3:138527314-138533376:138533511-138546321:+	Eif4e	-0.0317561	0.0524476	33.7596
ENSMUSG00000015165;SE:7:28815352-28817335:28817404-28818461:+	Hnrnpl	0.0316386	0.0852273	5.36315
ENSMUSG00000046032;RI:X:101211959:101212346-101213774:101213864:-	Snx12	-0.0313485	0.0829171	30.1584
ENSMUSG00000030062;SE:6:88084794-88088350:88088414-88089989:+	Rpn1	0.0311558	0.0519481	89.0614
ENSMUSG00000022965;SE:16:91547232-91554948:91555080-91557885:+	Ifngr2	0.0306897	0.0779221	40.1605
ENSMUSG00000024811;SE:19:36875373-36876185:36876373-36879235:+	Tnks2	0.0306333	0.0969031	35.7199
ENSMUSG00000019461;AF:11:69846376:69846522-69846908:69846617:69846691-69846908:+	Plscr3	0.0301427	0.0869131	36.6124
ENSMUSG00000022636;SE:16:52268499-52268790:52268828-52270647:-	Alcam	0.0300245	0.0849151	10.921
ENSMUSG00000021326;SE:13:21190124-21190593:21190686-21191220:+	Trim27	0.0297869	0.0879121	21.4734
ENSMUSG00000019916;SE:10:59343794-59348181:59348420-59350404:+	P4ha1	-0.029624	0.0734266	45.1114
ENSMUSG00000033272;A3:18:36679623-36680428:36679623-36680516:+	Slc35a4	0.0295162	0.0849151	5.57913
ENSMUSG00000064326;SE:12:112645084-112646838:112647032-112647825:+	Siva1	-0.0289607	0.0899101	60.3808
ENSMUSG00000022841;SE:16:20540415-20540808:20540813-20540975:+	Ap2m1	-0.0287861	0.0899101	39.8899
ENSMUSG00000001870;A3:17:75274034-75276396:75274034-75276555:+	Ltbp1	0.0284741	0.0724276	15.5711
ENSMUSG00000022992;A5:15:98520425-98524459:98520425-98524561:-	Kansl2	-0.0281971	0.0919081	34.1012
ENSMUSG00000029918;A5:6:39802544-39805371:39802544-39805487:-	Mrps33	-0.0280639	0.0904096	38.7706
ENSMUSG00000024962;A3:19:6985596-6985805:6985495-6985805:-	Vegfb	-0.0279521	0.0929071	27.007
ENSMUSG00000006728;A3:10:127063759-127064202:127063759-127064220:+	Cdk4	-0.0278444	0.0809191	109.308
ENSMUSG00000079677;RI:9:21073075:21073181-21073264:21073318:-	Fdx1l	0.0276883	0.0944056	10.467
ENSMUSG00000026193;RI:1:71597281:71597387-71598374:71598463:-	Fn1	0.027602	0.084478	232.012
ENSMUSG00000046434;SE:15:103242718-103242922:103243080-103243625:+	Hnrnpa1	-0.0275277	0.048951	51.2707
ENSMUSG00000020224;AF:10:120227070:120227123-120227974:120227186:120227549-120227974:+	Llph	0.0269836	0.0874126	60.5765
ENSMUSG00000037805;RI:17:28328967:28329047-28329374:28329522:+	Rpl10a	0.0267529	0.0771728	25.7891
ENSMUSG00000004980;SE:6:51467295-51467391:51467426-51469671:-	Hnrnpa2b1	-0.02661	0.0892441	25.0434
ENSMUSG00000028464;A3:4:43516003-43518230:43514861-43518230:-	Tpm2	0.0260473	0.0819181	22.0739
ENSMUSG00000028464;MX:4:43518464-43518644:43518719-43519227:43518464-43519003:43519078-43519227:-	Tpm2	0.0258779	0.0819181	43.1963
ENSMUSG00000024608;AF:18:60774510:60774686-60776401:60775716:60775742-60776401:+	Rps14	0.0249727	0.0979021	982.994
ENSMUSG00000017615;A5:11:78530347-78536073:78530347-78536086:-	Tnfaip1	0.0247221	0.0914086	40.4601
ENSMUSG00000003072;SE:10:80143985-80145219:80145307-80145423:+	Atp5d	-0.0242952	0.0549451	170.749
ENSMUSG00000037070;A3:8:78506863-78508799:78506817-78508799:-	Rbmxl1	-0.0241051	0.0939061	25.2749
ENSMUSG00000006728;RI:10:127065155:127065264-127065953:127066003:+	Cdk4	0.0235284	0.0879121	17.5783
ENSMUSG00000038633;AF:1:182279718-182282161:182282224:182279718-182282622:182282804:-	Degs1	-0.0233103	0.046953	27.8055
ENSMUSG00000019916;MX:10:59352259-59354340:59354410-59361861:59352259-59355350:59355420-59361861:+	P4ha1	-0.0219293	0.0734266	13.9421
ENSMUSG00000025290;AL:14:24493493-24495430:24495432:24493493-24495775:24496146:+	Rps24	-0.0205825	0.0594406	1740.27
ENSMUSG00000026426;AF:1:135146824:135147100-135152471:135147669:135147727-135152471:+	Arl8a	-0.020446	0.0844156	132.417
ENSMUSG00000037563;RI:7:28352177:28352273-28352363:28352410:+	Rps16	-0.0202642	0.0524476	315.242
ENSMUSG00000006442;AL:4:148594205-148594287:148594619:148594205-148594859:148594993:+	Srm	-0.0200754	0.0864136	142.05
ENSMUSG00000004665;SE:10:79992580-79993214:79993330-79993428:+	Cnn2	0.0192089	0.0699301	470.522
ENSMUSG00000021453;RI:13:51847352:51847453-51847556:51847769:+	Gadd45g	0.0190342	0.0894106	6.87641
ENSMUSG00000044303;AF:4:89276985-89281986:89282192:89276985-89294334:89294653:-	Cdkn2a	0.0178167	0.0869131	65.9181
ENSMUSG00000021131;SE:12:80641044-80642789:80642845-80643764:-	Erh	-0.0170009	0.0999001	65.6131
ENSMUSG00000028364;SE:4:63982923-63984460:63984732-63993027:-	Tnc	0.0164231	0.0719281	125.126
ENSMUSG00000063856;A3:9:108339558-108339777:108339558-108339780:+	Gpx1	0.0152101	0.0974026	158.305
ENSMUSG00000016559;RI:11:116023625:116023778-116023882:116024019:-	H3f3b	-0.0145269	0.0739261	16.1099
ENSMUSG00000067274;A3:5:115559888-115560719:115559888-115560741:+	Rplp0	0.0140392	0.0719281	76.5993
ENSMUSG00000028173;SE:3:159840047-159848565:159848645-159872909:+	Wls	-0.0139993	0.0764236	96.2083
ENSMUSG00000001025;AF:3:90613154:90613226-90613743:90613305:90613382-90613743:+	S100a6	0.0134181	0.0874126	618.602
ENSMUSG00000023067;AF:17:29090979:29091101-29098397:29093772:29093861-29098397:+	Cdkn1a	-0.0126666	0.0879121	68.877
ENSMUSG00000001025;AF:3:90612882:90613226-90613743:90613305:90613382-90613743:+	S100a6	0.0113585	0.0874126	3307.22
