# Supplementary material for: Nucleo-cytoplasmic shuttling of splicing factor SRSF1 is required for development and cilia function
Source: bioRxiv preprint, doi:10.1101/2020.09.04.263251, version 2 (2020-11-23)
Supplement: Supplemental Table 3, related to Figure 4 [file 263251_file04.xlsx]

## Sheet: common all lines
ID	Symbol	ESC_WT	ESC_NRS	MEF_WT	MEF_NRS	NSC_WT	NSC_NRS	all_exp	median_exp	mads	sdif	PI_ESC_WT	PI_ESC_NRS	PSR_ESC	PVAL_ESC	PI_MEF_WT	PI_MEF_NRS	PSR_MEF	PVAL_MEF	PI_NSC_WT	PI_NSC_NRS	PSR_NSC	PVAL_NSC	PSR_ESC/NSC wt	PSR_ESC/NSC NRS
ENSMUSG00000028649.18	Macf1	4.3096643982906	6.0108800141617	9.9183703749389	20.339332786509	8.7010103915378	4.100367079964	TRUE	7.35594520284975	4.15773374048938	2.80487667454426	0.47002070026513	0.71035508216207	0.595816062550009	0.0869748123007261	0.41274874774692	0.3403613785604	-0.27819649708385	0.525194290160032	0.2510149810453	0.29456612865601	0.230818078906357	0.588873389139067
ENSMUSG00000026131.18	Dst	6.3160581811373	7.5774810124336	4.9265570625802	8.0957305148065	5.1529974995179	2.5689420903868	TRUE	5.7345278403276	1.96512992402632	1.7818998182245	0.49675630261806	0.74915699770745	0.592729818101394	0.0556854156984315	0.26319553424512	0.27592738272959	0.0681536248259552	0.811821245595262	0.24153187240179	0.22579647566069	-0.0971906107871757	0.696531854886896
ENSMUSG00000066037.14	Hnrnpr	2.2690892877588	2.5472060488309	4.1077445288371	5.026317314433	8.4970627749124	5.504200753449	TRUE	4.56703092163505	2.1920201745334	2.29266994469404	0.51468713938148	0.73637237279785	0.516739766696283	0.508334204125984	0.52944716509209	0.5306096860443	0.0031642904495894	0.968424954722463	0.62350808471608	0.63720773011327	0.0313555017561478	0.926784375002699
ENSMUSG00000048154.17	Kmt2d	1.5629898681385	1.3264841494448	2.0974628466669	4.1952668049452	2.0072746628689	2.2302250846726	TRUE	2.0523687547679	0.494621466016728	1.55087747248851	0.49205446644957	0.59039082965721	0.262852293598279	0.0572353338598168	0.34116385156913	0.37637774721937	0.141716541119777	0.637244292238805	0.34633001858919	0.2852251461463	-0.280046261447509	0.0575276672526084
ENSMUSG00000058006.12	Mdn1	4.318469554384	6.5653785017819	2.7869086767611	4.6841125639518	6.2172043453678	3.5337693835679	TRUE	4.5012910591679	1.98809547820044	1.50310781584408	0.53624723945168	0.77705983332927	0.53512737413385	0.202984175173381	0.3601189817583	0.37464805177541	0.0570623037321097	0.79800803628422	0.33340509603715	0.28176595297654	-0.242778860857015	0.23680738747977
ENSMUSG00000047888.10	Tnrc6b	1.5822399144789	1.0433533932557	2.5420994585914	4.0471143344784	6.4629683832692	3.6779613678579	TRUE	3.11003041322465	1.82721140754563	3.13217970295055	0.55927550846173	0.6462946653469	0.208632929491645	0.115627817199158	0.28826513750448	0.3213640599564	0.156812223618125	0.607990284587703	0.21350877683887	0.17586138626707	-0.279856630557064	0.218669820223209
ENSMUSG00000070327.14	Rnf213	1.7083772180592	2.1166475099438	4.1228146006835	5.836058471368	3.1411021246281	2.3923524717182	TRUE	2.76672729817315	1.26645906140289	2.16751089070445	0.57907247204211	0.80071224275293	0.46753994933532	0.345564523847883	0.42372046738993	0.4614949753126	0.123202121797238	0.729583988131596	0.32594158834246	0.3518296236931	0.110263517642785	0.805706376303794
ENSMUSG00000002028.13	Kmt2a	1.4521161817148	1.3380814551973	1.4104421269658	2.2067887818045	2.067230683899	1.5945911482517	TRUE	1.52335366498325	0.22104361224666	0.976203679846347	0.4988090329805	0.58972614084569	0.241557554748313	0.30644910176141	0.20400584377835	0.21353682495898	0.06587440865831	0.820462184974795	0.20774369604227	0.1850293646161	-0.167050451080852	0.489372875515876
ENSMUSG00000026915.16	Strbp	2.3629834112677	1.9168406697689	2.3068952084473	3.9432523384132	2.57374919966	1.5316835812768	TRUE	2.3349393098575	0.486966293208272	1.26434608432198	0.61801771882165	0.59033403872274	-0.0661166712499787	0.975448712369556	0.23100370250967	0.23822066134234	0.0443825711494985	0.839213650577229	0.24557354077653	0.32759866149335	0.415774335931562	0.417491073469462
ENSMUSG00000034275.18	Igsf9b	3.3614131805913	5.5539068464543	4.0093298983973	8.7324372486504	30.44582828756	19.36620049797	TRUE	7.14317204755235	5.12653503324687	4.23103558751908	0.59990475642133	0.67148473667033	0.162621136387513	0.522279856183098	0.60352393127313	0.62750493196376	0.0562158194973715	0.422325372818514	0.61610085837556	0.62567698346386	0.0222514874787951	0.797953689582686
ENSMUSG00000055296.14	Tmem245	13.066343423679	13.865814927702	10.223568578077	19.555558213752	3.9327809608132	3.449384118736	TRUE	11.644956000878	7.36335807965467	3.24048752888651	0.5116263038977	0.61321880011292	0.261311489506838	0.642194601030217	0.62505830567346	0.64676444567749	0.0492496011085923	0.541731406990121	0.54026489536492	0.4459833827184	-0.276676986912955	0.103161754304681
ENSMUSG00000066036.14	Ubr4	8.1234869680599	9.4351093104777	19.013316574202	31.64683054379	25.947066039682	19.227650130817	TRUE	19.1204833525095	12.2403135233591	2.38270903604765	0.59629824160423	0.77394379550236	0.376194717883514	0.29363314952075	0.48920371743123	0.52781658950868	0.10960132905501	0.608727952434965	0.3588571053905	0.37334978404042	0.0571184100971255	0.590094507058125
ENSMUSG00000020220.16	Vps13d	2.1745099504249	1.7333761540688	3.9068393103275	5.8020137108064	6.9678803699275	3.4028789451796	TRUE	3.65485912775355	2.52177817354623	2.51074861448465	0.63323495485596	0.74117058517384	0.227064731192287	0.296776741385394	0.27265678981315	0.32405772776033	0.249164755719594	0.324334776757023	0.28110416212446	0.27795918997708	-0.0162317331858671	0.945331085122896
ENSMUSG00000024073.16	Birc6	4.5787244649237	4.6735238027851	9.4121963878996	18.113379788283	11.056477034181	6.2202455989578	TRUE	7.8162209934287	4.72963760400486	2.65053043119963	0.59690251505116	0.76752415594074	0.36271682388417	0.12394907355524	0.32922259612713	0.39087254772313	0.247634904678476	0.409706661359439	0.23151124740328	0.2116385982808	-0.129479517300788	0.617759561228368
ENSMUSG00000030655.15	Smg1	4.1323350481671	5.7091323036018	5.5283036992828	8.4200337733703	2.4126798201013	1.3540763550485	TRUE	4.83031937372495	2.44366022601892	2.97986162637975	0.50947999285298	0.62072762020424	0.284934848978021	0.291130232423518	0.37863457266362	0.37931207183045	0.00257913919300079	0.889434546358723	0.34752518271772	0.31820243677687	-0.127172639845431	0.642042896888379
ENSMUSG00000042744.16	Hectd4	1.7440565824887	1.8719638629761	2.4543278472275	5.00990413187	4.087926717065	2.8832053618532	TRUE	2.66876660454035	1.27615741166847	1.99730257666957	0.57127182883793	0.57399973856882	0.00687269184951876	0.836618484729407	0.44938159177661	0.47111940263736	0.0681517214007275	0.764107807448173	0.33423464099274	0.36309253996174	0.119476023063124	0.345971759409511
ENSMUSG00000036371.6	Serbp1	19.421180870873	29.607928012017	40.985329073031	41.334461830351	39.821085445258	35.821601303973	TRUE	37.8213433746155	4.94973730947214	1.18634977966237	0.58800236588907	0.58710922434338	-0.00219303619776354	0.764540592140972	0.63094145749937	0.66098216360938	0.0671051920054918	0.408416247290708	0.56299701170606	0.6616087652829	0.232851083350088	0.055676832336296
ENSMUSG00000022565.15	Plec	1.7488096180407	2.4964055257866	72.837144533765	94.427126743684	1.4351697893896	1.295752558023	TRUE	2.12260757191365	1.12254524998222	8.57159619840139	0.67848085988646	0.70217005759902	0.0495123597393824	0.397764350608614	0.54344428879802	0.56875847695115	0.0656839978068566	0.704321343947846	0.29401537479563	0.30942542594143	0.0737001508787946	0.466880867013953
ENSMUSG00000030451.16	Herc2	1.8159646944343	2.5419875906912	8.986457444635	14.561225077455	14.067587103655	8.3962324351974	TRUE	8.6913449399162	8.33675046193709	3.8606080437692	0.61685823417961	0.78235721484575	0.342888506518891	0.263811760415959	0.47232716597121	0.4680882110053	-0.013006084069242	0.854218014714685	0.36098574964938	0.3766641915169	0.0613370004477127	0.749608620140197
ENSMUSG00000038664.16	Herc1	1.8706714500923	1.5300861625604	4.4111487403548	7.130397900559	7.6495180440777	4.3279123582922	TRUE	4.3695305493235	3.89903521773096	2.96643805409516	0.61452527384894	0.69171312214131	0.170701479156798	0.155370479394183	0.37729443601754	0.37683348256303	-0.00176366722232948	0.935751842186908	0.20885434892541	0.20927628267839	0.00291163523365103	0.964456079926473
ENSMUSG00000022100.14	Xpo7	5.7093391078268	5.5563038033143	8.2463682989217	10.621309581117	11.645828018672	6.4297841073257	TRUE	7.3380762031237	2.5282106887223	1.60960588456688	0.62968991668778	0.65423130621811	0.0551592313270683	0.927777623922704	0.42095859806676	0.4354005575894	0.0486649061273998	0.75378888671234	0.5336797796808	0.49627224055423	-0.104842592416559	0.594010147440947
ENSMUSG00000045103.17	Dmd	1.9011592544097	1.5428745619038	2.1391989714826	4.7248695047025	6.4182251894745	5.3027440017263	TRUE	3.43203423809255	2.52159477318579	3.24366343879023	0.58500423199733	0.67211178859697	0.200254146984641	0.828617088397071	0.38963975164097	0.41934064060459	0.105981785585634	0.434190179481531	0.4478874466149	0.47310990216135	0.0790391257672876	0.997593826439523
ENSMUSG00000040249.15	Lrp1	2.1129623601037	3.5201944307896	68.771397684613	210.1159285894	20.243545287095	17.418537677967	TRUE	18.831041482531	23.7430429729113	7.72214116597108	0.56843941834612	0.76608702382226	0.430501683195773	0.28296386258329	0.71525409347964	0.77235429153161	0.110806937832935	0.420227027064972	0.51539847700408	0.50649658764984	-0.0251357246711546	0.726049748833189
ENSMUSG00000070047.14	Fat1	5.4520814297093	6.8391621826804	78.389023469268	228.61959038628	88.973800934335	52.207067166532	TRUE	65.2980453179	60.8864077066016	6.7082047528242	0.72201003262361	0.83948098749372	0.217478767389429	0.246765107244986	0.49462299060237	0.62317923099846	0.333317853506319	0.154519456967517	0.27439015997923	0.27552993029784	0.00598029921085092	0.912864104194391
ENSMUSG00000028456.18	Unc13b	1.5763276124867	1.6185271734599	1.2546262776271	1.6592011625883	1.6801072180308	1.7033810941838	TRUE	1.6388641680241	0.0769318215898414	0.394356854822264	0.54386011390868	0.70673786528065	0.377939583088387	0.557822373607762	0.47605062611432	0.42859211993223	-0.151509681685054	0.353951837045344	0.47012953325496	0.39360158567784	-0.256322279831296	0.194423038056788
ENSMUSG00000038538.17	Ubn2	1.6421877012078	1.8945631330766	1.5863139737181	2.1879340428319	1.866802342811	1.3445468248001	TRUE	1.7544950220094	0.228505101832456	0.792673595062721	0.63644085130402	0.46021878581878	-0.467706566480563	0.620774332954594	0.18390727208737	0.20330383209415	0.14465888081207	0.488238131980969	0.17721787695823	0.16908857344833	-0.0677449743642028	0.542290797270841
ENSMUSG00000025261.17	Huwe1	6.5184557767945	6.0154994519631	13.684706500912	20.669367870384	22.537681101318	9.7578716394956	TRUE	11.7212890702038	8.08656216440614	2.81306911963894	0.68717330571139	0.84373064670923	0.296108511348942	0.175449378207673	0.35392651083166	0.40175206154799	0.18285559621	0.514352828812422	0.32130356003982	0.3217145788634	0.0018443489020744	0.875761938607984
ENSMUSG00000018707.13	Dync1h1	8.7736113839699	9.2091941721183	29.191782994423	56.929788022973	32.136266345108	24.325611783895	TRUE	26.758697389159	16.9958386018373	3.30221053022649	0.62783270855734	0.75290891372849	0.262095147670056	0.387549045395775	0.38971186232236	0.45198152288328	0.213855950178508	0.280955339210253	0.27743010300825	0.25750823336399	-0.107505777526019	0.667744377058312
ENSMUSG00000043940.15	Wdfy3	2.7931468918067	3.2570792007437	8.8012500769309	12.919825911099	14.325966115713	7.8887067238439	TRUE	8.3449784003874	7.16299413638638	3.1222985628427	0.55055778422976	0.75281324065161	0.451398011799382	0.36983135843175	0.4337617452387	0.46059456745362	0.0865945721869107	0.573879478905911	0.45519654208826	0.42539081309295	-0.0977007215913484	0.390259210375133
ENSMUSG00000028763.17	Hspg2	5.1168574690806	7.1435495799988	55.528669432321	155.98438689832	11.491400639884	10.520999274003	TRUE	11.0061999569435	7.22915231068187	5.55613089844664	0.51560896008652	0.76294095340693	0.565294071700992	0.198689386419561	0.66485481386031	0.72642824651029	0.127780971822617	0.490763470584008	0.45947988595792	0.41734291379809	-0.138768432827921	0.179630504993204
ENSMUSG00000032855.6	Pkd1	1.7536893390529	3.0862843354714	33.66312699481	63.275453969121	44.602519853079	51.399600097275	TRUE	39.1328234239445	26.9902935710792	6.67982549619173	0.60528530231762	0.67727798251993	0.162132776658349	0.356993106327245	0.75393428889452	0.76481082371144	0.0206641535567319	0.884436422279003	0.57366142522476	0.52960531754724	-0.11528190223769	0.230115956788
ENSMUSG00000022957.20	Itsn1	3.3628856575803	3.0917549388966	8.2747997611646	10.667041799916	16.099433876693	10.041446297841	TRUE	9.1581230295028	5.41457094831345	2.99791102208633	0.60350589219215	0.67755285520928	0.166965637556509	0.649145795888005	0.51950275905124	0.52796976649773	0.0233239066674707	0.769259561573815	0.53325495076316	0.48125077165186	-0.148036600717175	0.151761158021895
ENSMUSG00000033943.15	Mga	4.5786901332634	5.8402275425294	3.478101335425	5.4153187194071	2.7258322345962	1.7645076306325	TRUE	4.0283957343442	1.99371633119032	2.158282427337	0.52135319645894	0.71008387616239	0.445728374617957	0.104469924817977	0.20624398864974	0.23526570759122	0.189938978129819	0.437078451795694	0.18021463704733	0.20433586757991	0.181226274408607	0.888896588531213
ENSMUSG00000052712.17	BC004004	5.6755641360434	9.9244194554061	21.678606721116	21.533141998048	17.061533124923	18.663292069113	TRUE	17.862412597018	5.55005640917738	2.20448304709676	0.63665080603367	0.49301728742129	-0.368864056657559	0.491984534574672	0.57207795281599	0.58714348110648	0.037501354162572	0.707449729844223	0.74678587196787	0.6757372727995	-0.144232199747639	0.0159082614739172
ENSMUSG00000040209.12	Zfp704	3.4461829698797	3.3999534640226	1.9409257691391	3.0627262887847	3.8441937805536	2.6189087296076	TRUE	3.23133987640365	0.613258394313708	1.06236463970842	0.63004984867222	0.51771878663774	-0.283297306449143	0.555024703914234	0.4735062694611	0.42605115695354	-0.152356859226308	0.240215279714993	0.58393911608515	0.55562198384586	-0.0717142731792321	0.46397356098771
ENSMUSG00000036698.11	Ago2	12.78305650104	15.737822322187	16.352789311564	27.014293289654	7.6117845524509	5.2130588184899	TRUE	14.2604394116135	6.47970682793054	2.61784645292004	0.47349872691589	0.55405100925041	0.226658258764153	0.70130880456403	0.47670055242104	0.47228265823252	-0.0134327351863792	0.934062407970506	0.50371112696532	0.47443507266867	-0.0863859352157865	0.368832203462473
ENSMUSG00000037646.10	Vps13b	2.7026079659323	2.0189119603103	1.5259444578715	2.8594583688077	2.3897118291462	1.1823271957836	TRUE	2.20431189472825	0.855046958818659	1.62336526673176	0.5178113804447	0.68100568001816	0.395240158177217	0.0208315603092854	0.24986302849952	0.22752908311254	-0.135086481290373	0.451988144286345	0.17395188712978	0.19100470511929	0.1349198471385	0.935783439893728
ENSMUSG00000040865.15	Ino80d	3.2008729045325	3.5189595349935	2.4246163845294	3.875877404373	1.4034287811974	1.1447019173601	TRUE	2.81274464453095	1.3116174131708	2.41662501797182	0.49790785392757	0.59329384667954	0.2528680475792	0.36512379329822	0.35464618267348	0.35928812167422	0.018760820731907	0.91600153137946	0.37651756460872	0.26575793457996	-0.502604402331754	0.212437588569884
ENSMUSG00000029104.15	Htt	3.1227329913178	3.5706320701752	10.396248577012	14.343707746194	13.440801840308	8.4028857108803	TRUE	9.39956714394615	6.66085870885937	3.06302499123374	0.63955508206259	0.68746986239607	0.104227851987845	0.389074599631603	0.46020551591742	0.49110588136043	0.0937558245129538	0.599192583217892	0.33016793925376	0.30972114502462	-0.092230154222949	0.462383256024469
ENSMUSG00000020721.16	Helz	4.5889891865099	3.4329527068328	2.3239460188858	4.3175275737435	3.2628028087943	1.9394972671397	TRUE	3.34787775781355	1.47784200661601	1.53148144168912	0.5326864317946	0.61098656590277	0.197854124987098	0.231677061186382	0.27315993174801	0.31013661740729	0.183157994494276	0.539753504157918	0.18883572559057	0.19637935560622	0.0565115420444347	0.977394561242512
ENSMUSG00000040407.17	Akap9	1.046868836059	1.1571459696143	2.7312128147121	5.657863672812	3.3491495758931	1.2301287761865	TRUE	1.9806707954493	1.30270634588751	3.54761948821451	0.56956791811592	0.80274289068977	0.495070096771488	0.0661990282903064	0.39857805079521	0.50897594475267	0.352735208268242	0.0333124960621381	0.26972793876619	0.22855848556141	-0.238941583460278	0.239894024582052
ENSMUSG00000009418.15	Nav1	2.2374241578818	1.5397311288383	1.9570756009389	3.0297979979876	4.2173911769374	2.911237951161	TRUE	2.5743310545214	0.795209112932201	1.70790668292538	0.3955960260804	0.64635543619973	0.708299799344452	0.29184616416553	0.22121958012585	0.2751591707223	0.314787328712121	0.211298263925443	0.19715108324512	0.172648654981	-0.191462542422122	0.398146879548582
ENSMUSG00000015597.17	Zfp318	1.08624246248	1.0309674944856	1.2771839188606	1.8945362531985	2.4656471660544	1.1494447459248	TRUE	1.2133143323927	0.229372088106818	1.53358486212559	0.63170802576055	0.71146970881993	0.171544433023672	0.369244079532207	0.23166512955377	0.27142923629368	0.228535220494311	0.406306510706209	0.30645516651111	0.38466936498943	0.327942910877482	0.327057765182444
ENSMUSG00000026565.18	Pou2f1	2.3519611610801	2.3873850855242	1.421566213069	2.2414171923233	2.0948240236111	1.2065532717834	TRUE	2.1681206079672	0.298821759235597	1.25355997680198	0.53708360290255	0.64969831237687	0.274623280857652	0.0767399735288466	0.31322455228587	0.33918952150023	0.114894298222738	0.703653426255075	0.18194289435873	0.15358940910532	-0.244406971757248	0.414844762782157
ENSMUSG00000029705.17	Cux1	6.0417021022543	4.2577687317977	25.399186202116	31.98624563591	23.022220140579	12.249022192863	TRUE	17.635621166721	14.3497029632275	4.08360582211921	0.53475099851939	0.43315845683216	-0.303972387050978	0.234466195459333	0.42304535240879	0.43894925872812	0.0532418428171965	0.498968632164637	0.4922074845823	0.56274808668937	0.193222650804545	0.10296258264044
ENSMUSG00000037234.17	Hook3	1.2407803508941	1.2653359817529	5.5053238566483	10.756120887413	2.7186823440518	1.6053878522216	TRUE	2.1620350981367	1.34764919910625	4.15689434408008	0.6250906533663	0.52879804394921	-0.241348590606234	0.940876009353073	0.40401091447623	0.43858444260935	0.118460369549433	0.405747462972911	0.3009735913265	0.30546058981576	0.0213493526662778	0.716643090933004
ENSMUSG00000005871.15	Apc	2.7745626656902	2.8749486380884	3.6075143064254	7.0642936294495	8.1696759902811	4.0093690617179	TRUE	3.80844168407165	1.45841291131355	2.0845692434862	0.54814221211262	0.669833621724	0.289252552632158	0.182330235416035	0.30184918643907	0.32073541538558	0.087555751253638	0.752826453373165	0.3428400368595	0.32613283438911	-0.072075901220461	0.545940058237329
ENSMUSG00000014767.17	Tbp	3.9118080749484	3.454522463894	3.0939924939759	3.109448921025	4.3147035872177	3.0038532757837	TRUE	3.2819856924595	0.345538918517663	0.701908820096347	0.52014945903354	0.50899979408034	-0.0312611521922331	0.567067002689308	0.50263562479325	0.51392518504461	0.0320454262721098	0.696125661779019	0.49787118186667	0.42429819791547	-0.230693959512217	0.107290202180883
ENSMUSG00000021488.8	Nsd1	14.209444494943	14.766411181686	9.8684232121268	12.581930312266	11.09315326662	6.1630748306568	TRUE	11.837541789443	3.21799907695165	1.36427962393764	0.53261244099631	0.73444847985239	0.463575164000738	0.306987057845694	0.24448539057995	0.2233964431673	-0.130142042391549	0.739540618980614	0.30052636543404	0.28644198933077	-0.0692485735928841	0.713805877212272
ENSMUSG00000061244.14	Exoc5	1.5199497665437	1.7401827074203	8.6914659369387	13.048184568154	2.0189006299125	1.2254569055063	TRUE	1.8795416686664	0.751438511974139	4.25756259212404	0.54592339487262	0.64219160140181	0.234305274261742	0.414081599970439	0.41128646123369	0.41054113089742	-0.00261681327096825	0.880807908382303	0.57724949630427	0.56170333258389	-0.0393866466881876	0.645253293448817
ENSMUSG00000022672.8	Prkdc	1.6596374504601	1.8666913941876	1.6534397047568	1.8764856936021	2.465077190219	1.2522528404877	TRUE	1.76316442232385	0.165343991531021	0.921390228658905	0.53063489804244	0.596111392553	0.167862385760693	0.30751504588891	0.35390869386869	0.40864138085896	0.207458102822543	0.593859478273101	0.19040117743663	0.1624806828608	-0.228774192264753	0.68073395877833
ENSMUSG00000010554.14	Mettl16	3.0844432028373	5.0115610030644	4.8784661064576	5.3395786123492	8.0120264935566	5.5321520142781	TRUE	5.1755698077068	0.484577363467337	1.14371790755553	0.58850368023707	0.58983101553447	0.00325024947152577	0.969997388892477	0.68443765547787	0.6778143421195	-0.0140289706294784	0.763769014021718	0.66772425244947	0.72598276304906	0.120682853445344	0.119280068942117
ENSMUSG00000074925.4	Ptar1	1.5707101089331	3.3468990136787	6.3674332356873	9.5622960011607	3.0036953004109	2.2199700012283	TRUE	3.1752971570448	1.89766439937197	2.96819376185481	0.54111851503051	0.47777929198782	-0.179600280184246	0.694102126561597	0.46879138780495	0.48451277388839	0.0475886357649287	0.64681725530693	0.68737063610337	0.71159485379641	0.0499678548690726	0.901914314075015
ENSMUSG00000041297.8	Cdk13	2.9230772784099	2.6344678315787	8.1022288905855	9.5128373497592	5.9474506713251	4.4661955985227	TRUE	5.2068231349239	3.59982778980362	2.58988897735982	0.5538948209902	0.71842300161531	0.375221492193829	0.222895048993401	0.26549679382839	0.25226824559776	-0.0737358212516498	0.773272422660761	0.24207004070266	0.21603838726164	-0.164136854575154	0.471721101163218
ENSMUSG00000045482.16	Trrap	5.7432450219044	5.3174228094415	11.830958892222	18.283671915842	24.663308884056	15.217087182919	TRUE	13.5240230375705	9.29621845647594	2.94401117094205	0.54635007477048	0.65705484438445	0.266188140552394	0.418406580703402	0.41959906461232	0.47469997962428	0.178004526039023	0.455465881819634	0.28321938944024	0.26369513361355	-0.103049089833368	0.40796038590825
ENSMUSG00000017291.13	Taok1	3.563559013125	4.4886203773111	9.7797832743921	18.842938486308	6.7106363151257	3.6267766395124	TRUE	5.5996283462184	2.9718131668033	3.05949989580823	0.52270654216211	0.57713672264144	0.142911915103852	0.357536808055289	0.43759835823882	0.40652276617979	-0.106271176808113	0.6057970245305	0.46329812647382	0.45296028228407	-0.0325562948427789	0.594098896604427
ENSMUSG00000019820.11	Utrn	3.5287377692858	2.9111649777867	6.66002272262	11.539059705525	6.1999317017846	3.2198569386806	TRUE	4.8643347355352	2.55019489563428	2.66756844770868	0.54785330233041	0.66787811454965	0.285795202752728	0.178392235461641	0.26397888450113	0.27679885089261	0.0684154197955678	0.711256554886783	0.31167844378965	0.27770776855735	-0.16649084370936	0.50722529428355
ENSMUSG00000040761.16	Spen	6.7813641737193	4.7570450250481	2.1302414345258	3.5501657428063	4.2572697088383	4.116615597583	TRUE	4.18694265321065	0.894659611925847	1.48417202884534	0.45763566090305	0.48896624271573	0.0955353903524451	0.669909935697359	0.24641928490138	0.21850075699048	-0.173476888599327	0.703308294705319	0.18639343463816	0.1923751595399	0.0455714783655312	0.743951640214366
ENSMUSG00000020431.5	Adcy1	2.4499451206362	2.1621845595032	3.4845525297164	3.6293568944122	6.0948293338409	10.352553239951	TRUE	3.5569547120643	1.85456932421919	2.51820506683033	0.58044620922549	0.59689295584815	0.0403098514297533	0.938788953227364	0.3800674537734	0.38576365337525	0.0214617306381602	0.876238948370811	0.54155073593824	0.55964686533802	0.0474202750892427	0.334894941449491
ENSMUSG00000056342.16	Usp34	4.586413699844	4.0235926058953	6.1391284417768	9.7957856648155	2.3464491484756	1.521173127398	TRUE	4.30500315286965	2.81151316012418	2.95517323023275	0.51378875252824	0.58423231406071	0.18536684805575	0.434672463275697	0.26990192272171	0.28076692888535	0.05693775848647	0.806133023771626	0.27475659820516	0.19520728757826	-0.493147214185475	0.383192111324202
ENSMUSG00000033454.6	Zbtb1	2.8250565682983	1.649391736286	4.2818920348045	7.8171879140169	1.9325411794965	1.2841508383838	TRUE	2.3787988738974	1.35217209983756	3.13990819359704	0.47587541962025	0.72027619569568	0.5979662887203	0.0793131280719058	0.24997798919633	0.28072791494155	0.167371459491211	0.651495940270229	0.22181898742073	0.35385085403276	0.673758537673304	0.129352751417389
ENSMUSG00000021140.9	Pcnx	2.6131864226469	3.9716895619641	8.304837756803	9.7700740671341	13.422901317923	7.7423132029528	TRUE	8.0235754798779	4.29834243368252	2.60666213494196	0.59084669018599	0.58752308667872	-0.00813829259212327	0.762624988901268	0.44811372376921	0.46451800900243	0.0518696192336554	0.789931935897256	0.61738177181694	0.61019080774254	-0.0169024415320012	0.721145662650122
ENSMUSG00000052698.15	Tln2	1.5540368662176	2.2271215716789	13.708541381299	16.010705568823	14.275948461751	14.334315871569	TRUE	13.992244921525	1.74986207310962	4.23490511706442	0.65454227237658	0.71549931389095	0.128464014604437	0.650826863384902	0.56148474332215	0.58415928148896	0.0571149771718797	0.827341734868867	0.5106597568696	0.54800626661501	0.101830020642634	0.288091347300937
ENSMUSG00000020783.14	Ncbp3	2.0975546976413	3.5111976407573	6.1095042490964	6.8378239627052	5.9032006403525	4.1191070208205	TRUE	5.0111538305865	1.92612468876177	2.09544404303108	0.5672250199292	0.6732404537398	0.247200697749314	0.812807044824474	0.60770028628051	0.61165043739382	0.0093474063653255	0.94543019744638	0.62520102008724	0.66430760126482	0.0875312901243143	0.623890025677919
ENSMUSG00000023845.7	Lnpep	3.7588215980535	7.1991451772734	12.790226757917	31.975665027429	5.2027273123527	2.5824887558952	TRUE	6.20093624481305	4.49269471117766	4.06557674115912	0.60409290840144	0.63325180600226	0.0680088359232379	0.646555980603346	0.50783963242403	0.53816074129543	0.0836641614806506	0.437618232687878	0.6050960213832	0.61618448105697	0.0261982490515135	0.810776425616538
ENSMUSG00000040481.17	Bptf	3.8580233698132	3.5466678749003	13.689437585676	9.18691771657	9.0389749718037	4.8873413511233	TRUE	6.9631581614635	3.95030937925082	2.83313884844296	0.5602078158955	0.7612603892938	0.442427900605099	0.0938129649745775	0.27488139331219	0.37901881297943	0.463460205485439	0.437624202439502	0.3002834292309	0.22081848997454	-0.443463884219481	0.156406632944325
ENSMUSG00000037486.18	Asxl2	8.581848923571	6.8630482323488	3.1090060466818	4.0601930162361	3.9479934603758	2.9461956987199	TRUE	4.00409323830595	1.44774758124612	1.88900630219707	0.50357323870921	0.54655598429706	0.118167663974165	0.47681448452904	0.21915844764151	0.22094929182161	0.0117410172362439	0.905723214888719	0.20841473270689	0.19410802050003	-0.102597533309918	0.552430742239179
ENSMUSG00000055013.15	Agap1	2.5570123360679	3.4137404249724	11.446247495604	8.2818554593691	54.516161263708	38.057629263187	TRUE	9.86405147748655	10.1983236987624	5.79454556949538	0.64880943352782	0.5557449908251	-0.223371756471133	0.410500095531567	0.48075941288565	0.50890179806556	0.0820721840338439	0.514511275655037	0.64537165545376	0.63302388404059	-0.0278702827683305	0.427369132258429
ENSMUSG00000020716.16	Nf1	2.1374593504935	1.9253067956328	5.1685854146061	8.8291414338985	6.4344761728395	2.7887680166284	TRUE	3.97867671561725	2.88705755445071	3.24202408789017	0.52552067469082	0.63088656503132	0.263633105510834	0.255069772863619	0.3263637582364	0.34146978270407	0.0652770583587939	0.790520516937247	0.31785212992742	0.27325112365768	-0.218128327434041	0.436263126879948
ENSMUSG00000031010.17	Usp9x	5.5101954768951	8.0127278383083	13.368193959609	22.756917871527	7.3454839659934	3.6548671837171	TRUE	7.67910590215085	4.59098146021703	2.80203318749827	0.52237757618484	0.78330756483559	0.584485922909068	0.108819106448868	0.42224164808464	0.49172593708157	0.219785568156217	0.366231279687946	0.37956347393053	0.37723903488226	-0.00886219903793006	0.607530327216175
ENSMUSG00000042197.13	Zfp451	3.3571386606306	3.2055177676299	5.2686446544642	7.3770613871243	3.8044387673635	2.1753858751228	TRUE	3.58078871399705	1.32001347699945	1.84314829115128	0.53081853051633	0.65583996075003	0.305125073648012	0.516471117861139	0.39365191346003	0.38688319001	-0.0250224455231932	0.799068122707777	0.45214901093271	0.47963906670746	0.0851508635363374	0.913183795985013
ENSMUSG00000039298.16	Cdk5rap2	2.733239292878	2.2883436194187	2.9532677621533	3.2812217004969	17.676318055436	10.137080024835	TRUE	3.1172447313251	0.899127625777049	3.46041361535846	0.6334903447925	0.76794140988773	0.277673613678927	0.0956376439627922	0.29536661449194	0.34827482875978	0.237719440821778	0.454164884851606	0.24918232499955	0.2390591663439	-0.0598340141525041	0.780180778520918
ENSMUSG00000026463.17	Atp2b4	1.392084105331	1.7173794953127	4.1880048947413	7.4306892248692	4.0983345791323	2.0313015063302	TRUE	3.06481804273125	1.83147460859642	3.26814548547027	0.50556955107309	0.84348528976263	0.738453331413564	0.351475653151461	0.54120520132367	0.6088814881402	0.16998574667557	0.0708113483131846	0.48213264722229	0.48786816009847	0.0170612072815506	0.843154067553868
ENSMUSG00000028053.13	Ash1l	1.7346595443242	1.5141327081484	3.5952238811883	5.7723696183269	5.040285837544	2.3999035229362	TRUE	2.99756370206225	2.03585824791955	2.80906922549451	0.49447676291091	0.54643053462612	0.144135378318062	0.401398383313851	0.13783854192439	0.18535988139999	0.42734968050295	0.315668302464078	0.16117466800694	0.16611629902421	0.0435686230383802	0.852881211860536
ENSMUSG00000020124.10	Usp15	2.8576509565315	1.8441023270719	5.1925955945293	9.5889889720303	2.5194696674178	1.2494812901763	TRUE	2.68856031197465	1.69278598306753	3.19907954552537	0.57807833588811	0.64390668507215	0.155586621379273	0.419378776725964	0.20862342625194	0.25410642916394	0.284531710899848	0.494775034330565	0.2310336473766	0.3349171502063	0.535701275691276	0.234407983643233
ENSMUSG00000040225.15	Prrc2c	3.9408525940245	3.661458660686	4.75731252752	9.7716096032214	11.432886674862	5.140825835365	TRUE	4.9490691814425	1.70189663528976	2.12424731811838	0.53983003975835	0.70436731593251	0.383822706504093	0.1216364278012	0.22243009205722	0.28877541633619	0.37659594959164	0.352163317784382	0.24685711266873	0.3117385079227	0.336660162933465	0.706293364795918
ENSMUSG00000022263.10	Trio	1.3969986748777	1.1266826520507	22.144707143266	25.052359993663	20.504042814585	16.378740165075	TRUE	18.44139148983	7.64597884578351	6.08960072123458	0.58687105810062	0.73514306894595	0.324981483062984	0.510744498011513	0.36195830955669	0.3695663408929	0.0300098290350079	0.910469543527115	0.25967028783681	0.22737908074088	-0.191581416508849	0.127969746199834
ENSMUSG00000005533.10	Igf1r	1.0261788682181	1.4791680535805	27.01501093978	52.380013085085	17.828444069174	16.70318652988	TRUE	17.265815299527	18.9297203315397	6.90279154222958	0.69383277024864	0.74423336000642	0.101167078410176	0.410265399665959	0.65367144548867	0.67722515477433	0.0510698846265416	0.668423084101573	0.44142650293654	0.38824928177186	-0.185189994860744	0.106459064555385
ENSMUSG00000025609.15	Mkln1	1.9600030986509	1.2425440784494	5.0804634634348	7.2591534145259	4.8701468738417	3.085555021371	TRUE	3.97785094760635	2.3131972684143	3.17395123937951	0.61887339279573	0.61551706856765	-0.00784543368376877	0.863606444290298	0.36746349133887	0.37734304583757	0.0382757658656442	0.828062309328553	0.23359358901084	0.24115276664584	0.0459466817226963	0.975451106399182
ENSMUSG00000015647.9	Lama5	12.735116087752	20.314430788559	13.9396724338	27.458667633994	36.247520003048	28.101179558729	TRUE	23.8865492112765	10.4979252317099	2.04843075622575	0.51437590162416	0.81336534716706	0.661080472781751	0.248286269980378	0.64673303115208	0.72014528481292	0.155117694359444	0.372388591995637	0.5161299966427	0.5465512995745	0.0826224341537035	0.7098219076085
ENSMUSG00000034342.9	Cbl	3.6496864413315	4.3032785091318	4.8260060335292	8.8914279928452	6.8175668093704	3.3203196136679	TRUE	4.5646422713305	1.60067314290354	1.72453003747282	0.49867555600029	0.5396542237975	0.113933828867249	0.890147573744936	0.47041536683064	0.50070972507724	0.0900392877977305	0.554943180235007	0.45794596280811	0.4249619641535	-0.107843651831469	0.379419963256639
ENSMUSG00000070733.13	Fryl	4.2482803618306	4.5496951605631	5.5033238090527	9.3122535669918	13.169764005939	7.6218875697811	TRUE	6.5626056894169	3.20777994037905	2.17335201690132	0.56656386783649	0.7073937412164	0.32027485669921	0.311653566919901	0.29573519971737	0.33363235967539	0.173953255818852	0.514836484067303	0.26808574234386	0.28270915175893	0.0766240920998039	0.864179137290096
ENSMUSG00000045962.16	Wnk1	7.8663717689921	8.5105630348953	14.230066326826	30.851763698336	14.347722099376	7.4181329781626	TRUE	11.3703146808607	4.80462499991358	2.54030973992311	0.58557142436235	0.46158556658783	-0.343247039665875	0.584837943995619	0.36024145300497	0.37594187978562	0.0615454382258239	0.745818674457031	0.4010282052929	0.34016414405352	-0.23747263077627	0.315274643483522
ENSMUSG00000069729.14	Arid1b	1.9348642049863	1.8020290011019	6.8469545888092	8.5427788333384	8.6802199006512	5.5478332590702	TRUE	6.1973939239397	3.57915272987349	3.26757932918714	0.60744352783988	0.70291833875156	0.21060680250748	0.411173389499976	0.46303195665238	0.43173216538686	-0.100975184019919	0.498259768596395	0.37344874886061	0.40467565811408	0.11585580634364	0.698302302006638
ENSMUSG00000055670.14	Zzef1	1.6978920518683	1.8985144648868	13.896839771672	23.677839766269	9.3504812019032	5.7653808802476	TRUE	7.5579310410754	8.53937241062783	5.10929839574005	0.62958868272292	0.71836421394638	0.190305874857375	0.512273554835217	0.40301319866115	0.44942280325154	0.15724623952589	0.433417119067159	0.28595723303349	0.33626560863953	0.233801837963357	0.420542001460788
ENSMUSG00000046994.9	Mars2	8.4868066680073	5.7978244235682	3.0618499534118	3.8141726322736	3.5672317803619	2.6502368768091	TRUE	3.69070220631775	1.23746512384394	1.86926111764067	0.48628974738288	0.53212486810384	0.129948652358387	0.146499082603231	0.54346293237375	0.61441337887938	0.177027993514865	0.0279973309902718	0.45529701038043	0.53117143070059	0.222369566545151	0.320376455223562
ENSMUSG00000063108.15	Zfp26	3.2598332387082	3.3118291411146	3.7919308657532	4.7058591024111	2.9466896729904	1.5915959242426	TRUE	3.2858311899114	0.626577296195064	1.35208867525239	0.50977742695328	0.66294710248182	0.379026268235798	0.347265228461317	0.33392889924805	0.35327411857904	0.0812471048475349	0.585650797419288	0.39541358109117	0.41894089517855	0.0833842971495866	0.990913718909216
ENSMUSG00000025949.16	Pikfyve	2.8182551135582	3.1997398596875	5.5718703298795	7.9350808524659	4.388439837176	2.1140751544426	TRUE	3.79408984843175	1.96878118161592	2.32019321125937	0.56899242559726	0.69108095901959	0.280445282345532	0.303246327098289	0.37485605035022	0.41440985252799	0.144721615176497	0.46392488417212	0.38504707173623	0.39467441175753	0.0356281618067047	0.983150579483094
ENSMUSG00000022995.16	Enah	10.567180094284	8.154261208809	25.27061969611	27.977091159642	11.457734881859	5.0017025267399	TRUE	11.0124574880715	6.57455355465241	2.93362150543244	0.50605472455581	0.74538748530881	0.558697191304908	0.228797657077297	0.28338538660751	0.29235056320372	0.0449340062017699	0.747535413646802	0.36198349281969	0.4834567475692	0.417462915851416	0.204768943595941
ENSMUSG00000036099.16	Vezt	2.9924543746593	3.8407490118464	8.8320566262743	8.6970962251331	10.735834178393	5.5394128309258	TRUE	7.11825452802945	3.7000563345754	2.56131441599244	0.63601069495273	0.54747419139367	-0.216260069713435	0.662258389313909	0.53419883007884	0.53828634591209	0.0109970142380882	0.729855992816215	0.61914382522878	0.70109309603362	0.179331446027043	0.144359546598401
ENSMUSG00000026605.14	Cenpf	3.025404232024	3.0379187134797	3.1581397214726	2.7733747169342	4.9255534575499	1.9338700125661	TRUE	3.03166147275185	0.285226297864316	1.0689596671458	0.56902837179838	0.7577855818197	0.41328910313044	0.297277367644848	0.11350609017885	0.11432077535198	0.0103178987796141	0.933748831663349	0.26550015340706	0.24589710799759	-0.110657927165559	0.476154678555191
ENSMUSG00000035623.14	Rsf1	2.6928057644457	1.9594288951257	1.693295572063	2.6167738505798	3.5374592541537	1.8112325680281	TRUE	2.28810137285275	0.653510210504367	1.42259732029011	0.50110514578708	0.71415858829033	0.511131126503538	0.0251705541258982	0.17003941798392	0.24458840054758	0.52448676057686	0.240722057744386	0.19214275599214	0.28538736766235	0.570742890893974	0.352504453074399
ENSMUSG00000037110.20	Ralgapa2	3.1508488856119	2.3073068370279	1.6081395713286	2.0031308929584	4.4123558838358	3.0324356512724	TRUE	2.66987124415015	0.850803347954039	1.73557646573674	0.5945521707028	0.57538208299542	-0.0472831117419765	0.50686720572197	0.31510048796846	0.3345413655154	0.0863726203441118	0.398333813669958	0.28296214421979	0.21994434079405	-0.36347057566005	0.123210751220091
ENSMUSG00000006301.17	Tmbim1	6.8370227826867	17.42925161539	59.644478543251	72.115979731924	18.289254150443	17.926130072993	TRUE	18.107692111718	8.85787511353885	3.60622919289967	0.57144359122125	0.56777368805031	-0.00929510027030643	0.723117944154986	0.74669326792219	0.74277082192127	-0.00759858060898892	0.436944011421433	0.73571179430185	0.70341620879014	-0.0647621402878442	0.0234031238882441
ENSMUSG00000040423.10	Rc3h1	2.4006336545576	2.8636786455273	6.819925396278	10.425035862598	4.4965202625736	2.4112375651762	TRUE	3.68009945405045	1.88907531538653	2.95938267174227	0.56671953556289	0.56096921940986	-0.0147133230965481	0.834141635326876	0.35411888953846	0.35315208011977	-0.00394420832307758	0.937330290376651	0.55742739520573	0.52250417025892	-0.093341354749859	0.535597352637416
ENSMUSG00000034243.17	Golgb1	1.5316388391581	1.9621272437843	6.4569115396687	12.847952853935	8.0569306972363	3.1766096435914	TRUE	4.81676059163005	4.51807780004397	4.24868628826121	0.61252229773362	0.84983437648167	0.472419339304718	0.120425847412308	0.38545313141591	0.45031024082998	0.224363838914144	0.346128376102572	0.36587198982976	0.32925166575856	-0.152148231652877	0.336702983478577
ENSMUSG00000043535.13	Setx	4.9708605975162	7.7496004811319	5.5702676955865	9.1859317510217	3.8702424456129	1.9509277973894	TRUE	5.27056414655135	2.87576811173023	2.35754237139906	0.50927013791131	0.81192226874518	0.672910489915488	0.142183124028814	0.46433589552452	0.46685215919397	0.00779694270120814	0.989336261698524	0.43172499386161	0.45638474207335	0.0801379428417853	0.928330661420897
ENSMUSG00000033253.18	Szt2	2.6981860838571	3.3506975878618	2.3745652057888	3.2667790431766	5.8841683858062	5.3591329549358	TRUE	3.3087383155192	1.14510489557426	1.61903760579123	0.53344520300295	0.66237925376366	0.31231740625389	0.380829524322935	0.41482682760495	0.4491946323737	0.114831489558417	0.519621610964934	0.40999707894626	0.42614047544584	0.0557154561274092	0.822154769148494
ENSMUSG00000030180.15	Kdm5a	3.2792136867352	4.5598447877132	5.6541313275713	8.3359274940355	5.8633314356076	3.1456622490431	TRUE	5.10698805764225	1.91560648723911	1.77076253065242	0.56301819526897	0.64102498135377	0.187199033966216	0.457384630002532	0.36770329691094	0.3708844074138	0.0124275037309054	0.891635654359717	0.3850872431574	0.3738436399545	-0.0427503422685215	0.778217538208816
ENSMUSG00000019849.11	Prep	5.8487097838529	4.9482535854429	26.80693232309	30.999507424896	22.147635842864	19.695550523688	TRUE	20.921593183276	11.833559731657	3.47471405556896	0.59595267591068	0.68305462736776	0.196803190757648	0.832454780579782	0.41291898721281	0.52218845813437	0.338711810954361	0.0749834926034934	0.38835840551001	0.44852902660445	0.20781266078594	0.0916843927875978
ENSMUSG00000028664.14	Ephb2	1.3327021498313	3.4835957674489	6.5416680160497	5.1602614714835	32.759579086498	27.3010633331	TRUE	5.8509647437666	5.10431868302855	5.49805239258106	0.64057005749782	0.65170312297081	0.024858545348756	0.761141395332863	0.74281394990167	0.72021786931777	-0.0445675143970175	0.548543158932144	0.69849918527734	0.68657079698671	-0.0248499387445878	0.579038998168332
ENSMUSG00000035161.7	Ints6	6.5273460761608	5.8447938410766	3.7008316305619	5.046679078783	2.7084808247574	1.6968290615989	TRUE	4.37375535467245	2.32494883899742	2.4265754753408	0.47931677155109	0.70850862713794	0.563805998677209	0.159447905678285	0.32979422018612	0.33228977739378	0.0108757954315763	0.947018531994338	0.34713121481728	0.33941744282028	-0.0324203938180759	0.682939781037119
ENSMUSG00000026384.13	Ptpn4	1.2633860341735	1.1632631886308	1.0363422458916	1.6805203704376	1.3823068181424	1.0346852887555	TRUE	1.21332461140215	0.256463537409518	0.855628742435195	0.51080901127194	0.48720300743199	-0.0682609372885267	0.909194055423383	0.29713265372808	0.33883726069377	0.189485370804266	0.470704618981031	0.45586935206202	0.4075937966667	-0.161488325860146	0.489660464700868
ENSMUSG00000045071.14	E130308A19Rik	2.414372228098	2.4388385406904	1.6076822594579	1.5864794079183	4.1753885194815	2.4220237690982	TRUE	2.4181979985981	0.616136151277652	1.38758257937115	0.54544839497904	0.51582807396033	-0.0805524152450591	0.494772643448481	0.31126397792838	0.27253270446323	-0.191709259192686	0.436915387892723	0.56095124885453	0.54348497396473	-0.0456352457546806	0.682505563624115
ENSMUSG00000044465.19	Fam160a2	6.9802905483533	10.089067865065	5.5066155225348	6.2508176314075	4.5977066539642	4.7270689577461	TRUE	5.87871657697115	1.67031316511712	1.3024421088487	0.47945536409179	0.6420649717735	0.42132278302702	0.263288163639719	0.65114177838792	0.6124943681751	-0.0882751285650259	0.0556452568575568	0.6719798088941	0.64509043981123	-0.0589164483397321	0.31897794597616
ENSMUSG00000024298.15	Zfp871	2.4519357164465	5.3501112344336	4.2853789183204	7.7069126502931	3.7371690228287	1.9328766361271	TRUE	4.01127397057455	2.14841751148384	2.30022844398139	0.50700497323648	0.42506163590633	-0.254327844880549	0.911957263199737	0.34150713750352	0.38173819263717	0.160667803221567	0.188852508780699	0.52001575550791	0.57997955777988	0.157446716372609	0.913744025604153
ENSMUSG00000022521.10	Crebbp	3.4459567776567	3.2812049025029	4.7977341073187	8.0783581565186	8.5924937525165	4.605853583034	TRUE	4.70179384517635	1.98403460135615	1.85548109045882	0.51705545434294	0.6200508214029	0.262067450085038	0.321756997338345	0.30111233871876	0.33871933356392	0.169788509160974	0.442422227900761	0.31403457838953	0.26749769757315	-0.231396949316711	0.250325363088714
ENSMUSG00000031467.10	Agpat5	6.6881763443736	11.861189201818	9.3413467472411	9.1986738165924	26.430064776971	18.890590839706	TRUE	10.6012679745296	3.94051787471341	2.33258679773636	0.70053639258436	0.46897229966718	-0.578957289045244	0.310465649813938	0.46152205634823	0.48264111006572	0.0645512090846386	0.46927352352306	0.70228857974028	0.7749264589285	0.141995429109891	0.344797333281584
ENSMUSG00000032253.13	Phip	5.5502597204871	3.9462792864055	3.6575345932772	4.8882593312468	3.8900378551498	2.382006868128	TRUE	3.91815857077765	0.912336248256865	1.15030262517053	0.51137710724133	0.62974310677207	0.300375848102493	0.285942820413528	0.22828474327612	0.26161859673223	0.196630651507813	0.402282439449921	0.15559876926113	0.16995843433718	0.127351309578854	0.971131950765691
ENSMUSG00000059495.14	Arhgef12	2.7467329925629	4.1751780784049	17.685291162169	23.557353263252	23.613247820481	11.047183087087	TRUE	14.366237124628	13.6681834223978	4.3522345165153	0.61203752069201	0.68901879858871	0.170923245284986	0.719726202846678	0.55197772330469	0.48260107746861	-0.193778907390038	0.3810620934442	0.60345208109583	0.59096849247724	-0.030157998970162	0.663621648039781
ENSMUSG00000026604.17	Ptpn14	3.2071289972348	3.1801886364798	20.769293755142	33.993824582246	24.441700907262	19.332695432769	TRUE	20.0509945939555	13.5906504603739	4.47183085477159	0.51338648756612	0.69054206898004	0.427683984165959	0.416174849345169	0.49088716695661	0.50979874704304	0.0545363761167919	0.643502770959026	0.33362320723313	0.30291818246189	-0.139291470342138	0.151470310576624
ENSMUSG00000019841.15	Rev3l	2.5598228505319	2.7616476123309	1.4886332803512	2.0699516532544	7.302584149567	4.2608719927033	TRUE	2.6607352314314	1.30682704283836	2.38820782798922	0.46675420412898	0.57108233020912	0.29103572993554	0.232131651516331	0.25808291977604	0.29593217682158	0.19743190448081	0.411133319416036	0.386748991842	0.34351317345223	-0.171032104642026	0.521726174247093
ENSMUSG00000029505.17	Ep400	12.440271197837	8.2812249656308	8.741986250799	11.491188277591	13.867393551436	9.977625639091	TRUE	10.734406958341	2.74153863123927	1.00958621533962	0.5323975172962	0.58725523107252	0.141483815723054	0.349933547522777	0.15782945425596	0.17060085503304	0.112258409954043	0.705821357096637	0.11290683750837	0.10263751509415	-0.137574709120085	0.430034888288532
ENSMUSG00000039262.16	Prrc2b	27.245861547145	23.840818683585	16.881664079041	27.392259190164	25.019867468032	19.471438379361	TRUE	24.4303430758085	4.28281225837348	0.868256366993962	0.52487168750585	0.59885667218162	0.19024597764837	0.437061754367092	0.35881207397631	0.3840128235484	0.0979260508873121	0.613318198657782	0.3729597587888	0.38399064245423	0.0420511775283051	0.295816810664931
ENSMUSG00000028514.15	Usp24	4.0844754456899	4.8501244006304	7.9530349717606	12.763386087732	7.5809822650093	3.2120698433458	TRUE	6.21555333281985	2.86776317667621	2.49266379624553	0.58982924096575	0.7674429012418	0.379762069850573	0.14729584902993	0.34330191899561	0.38009660011241	0.146888198918862	0.539777244168456	0.32497812267329	0.27171374568685	-0.258255048376012	0.184497934072519
ENSMUSG00000034297.14	Med13	1.7502413910509	2.7252256769273	5.9253800450917	10.793503574241	3.8785917111502	1.7133634500529	TRUE	3.30190869403875	2.3278395610716	3.41289805997135	0.5486463099739	0.61353361243987	0.161265982205229	0.431479419771461	0.4196167616409	0.40667465909294	-0.0451972119961441	0.884052970563081	0.48488544716239	0.45638046500919	-0.0874069152925605	0.514406685302316
ENSMUSG00000031393.16	Mecp2	3.5106469282816	3.3804701379713	5.4820489869539	6.0386687730645	8.0883873393971	4.9409019775137	TRUE	5.2114754822338	1.87402259353756	1.51872886533061	0.54947354777795	0.46365195865297	-0.245007780566094	0.281948897180123	0.38018563129883	0.38444097647397	0.016058109150743	0.880441358697035	0.55126021586257	0.52594744270562	-0.0678148467594973	0.554125878435285
ENSMUSG00000057133.14	Chd6	3.0243058387728	3.4940940609514	2.6270797640158	4.1544177887561	7.8525032616494	3.8613447864706	TRUE	3.677719423711	0.83775198852262	1.51239158050076	0.57130126258732	0.65125734032651	0.188976009799185	0.500064355553073	0.25322429603014	0.30431683134222	0.265158296318038	0.351376493153041	0.23650168844659	0.20604865281277	-0.198865452352629	0.594645396207315
ENSMUSG00000027878.11	Notch2	1.1727765097389	1.7452300523457	18.83040808928	32.489639833897	30.520056042297	22.971134319435	TRUE	20.9007712043575	15.7216041654422	6.38181028538375	0.74551737084066	0.86058404380604	0.20707412310098	0.262375762883349	0.6033004732378	0.66468540133963	0.139794953916605	0.313265082080309	0.49078096775707	0.51443930167599	0.0679215615219465	0.927249186535377
ENSMUSG00000039801.7	Cplane1	2.279455176176	2.5434117665308	2.2811070320149	3.3713490477163	3.2438043350891	1.6704774340803	TRUE	2.41225939927285	0.648330741378932	1.16385939222132	0.56826232500422	0.71428255246961	0.329937811651624	0.170506949850822	0.3667996720314	0.38648821874513	0.0754320884232394	0.839288916042171	0.26941740215695	0.26757143718935	-0.00991892121316244	0.9195338189563
ENSMUSG00000060206.11	Zfp462	1.7814262940394	1.3500812667669	4.2529556236163	7.9989075470915	6.7532757701087	3.0588433281575	TRUE	3.6558994758869	3.09885000812421	3.44133087661756	0.56849907790312	0.73035647421558	0.361442781007072	0.16342886183096	0.1694416586414	0.21020421199729	0.311002960942231	0.465599875647262	0.23330659010808	0.24445654949124	0.067350999549959	0.861687849410956
ENSMUSG00000055204.15	Ankrd17	6.8758149128803	4.2925525625368	9.612511442604	16.789426704045	15.471206345503	8.0746707186561	TRUE	8.84359108063005	4.83239732661541	2.34917167322619	0.5792435954121	0.73387412960429	0.341362452927126	0.0542855168671034	0.25198898531708	0.31963180353535	0.343050290831827	0.304469238723388	0.19736177486743	0.21134154633952	0.0987338108163094	0.972788236059502
ENSMUSG00000053617.12	Sh3pxd2a	3.2941878293052	4.2364385263732	69.67943034003	73.806220348094	4.5097239859749	5.9603459559353	TRUE	5.2350349709551	2.17900953047363	6.18835814839694	0.56005326714034	0.70279981365196	0.327549759171733	0.454496196498868	0.48529857559135	0.46889157737269	-0.0496182612456625	0.646678431294564	0.56000777348057	0.59057611003219	0.0766761444022108	0.686073248205596
ENSMUSG00000061751.16	Kalrn	1.5788846479572	2.0477137946316	12.17994959517	17.044309344741	3.7671389298668	3.7199423781854	TRUE	3.7435406540261	2.86177594816802	4.17477251212088	0.52088135923258	0.6163672055168	0.242835295422915	0.758738338565435	0.51130801730231	0.5075557907051	-0.010626235095989	0.915001199310704	0.57637196375448	0.55644271131614	-0.0507669985228948	0.105462198583155
ENSMUSG00000075595.9	Zfp652	3.1314809648941	2.6187416926829	5.1316785448845	5.7196812272013	8.4057007204156	4.5070970776331	TRUE	4.8193878112588	1.91863285444833	1.89840275499134	0.58741062703281	0.58838118354886	0.00238174373732979	0.963861634700407	0.25351046720857	0.25516761168917	0.00939990410853314	0.783955660036112	0.50343673153664	0.56607456820312	0.169181628113949	0.648087429851321
ENSMUSG00000026749.11	Nek6	2.8388752833175	4.2314103931932	15.036725504013	12.686417298925	19.219125833909	16.023310817874	TRUE	13.861571401469	5.5740525301488	3.41397085652123	0.49079783530063	0.54264355884274	0.144875973739626	0.863364146229796	0.55774999824481	0.55708894379141	-0.00171091994994313	0.921749742185486	0.77939900142959	0.74765865352101	-0.0599823307499848	0.311810589152617
ENSMUSG00000026275.13	Ppp1r7	2.5946840794506	2.929666168921	3.8139061643518	5.2109125439305	7.7405832887453	3.773192440172	TRUE	3.7935493022619	1.52911535641563	1.6796112493728	0.51771551802729	0.73569986882051	0.506957771866562	0.449321460663244	0.49739584593966	0.52440984275577	0.0763003052859989	0.687982868396625	0.69198107618169	0.81011199360148	0.227388781992377	0.0265805239759594
ENSMUSG00000053774.9	Ubxn7	4.5511658466901	6.2176000935804	7.6332364153029	11.803761145184	5.0998317555563	2.3242392407491	TRUE	5.65871592456835	2.28473891251267	2.34033038470199	0.59288560853088	0.55462992786852	-0.0962283113478742	0.899364200846339	0.51887192850808	0.51366904981394	-0.0145393373776274	0.97759856078541	0.57129277514987	0.65661495404961	0.200817321878107	0.510121735908222
ENSMUSG00000031229.16	Atrx	7.3241935983878	7.0191998858515	3.531797426015	5.7682863925525	4.274607230286	2.3268838577709	TRUE	5.02144681141925	2.5852114434768	2.1331782240043	0.46830172422326	0.67341099754269	0.524048932301984	0.139650247756802	0.25154090134118	0.29432388308401	0.226611609509733	0.421052175624951	0.19831878957754	0.26512911352739	0.418873728417385	0.353125425207415
ENSMUSG00000064302.13	Clasp1	3.4986929590217	2.4851410664246	13.633653454742	18.814425540301	19.190247292945	11.690430158534	TRUE	12.662041806638	9.40012078876376	3.88007788743094	0.57682159635751	0.68714896834387	0.252497717093162	0.546513648366152	0.31006566590118	0.37584664106917	0.277570327850394	0.195650980865665	0.25739648789893	0.27527905597973	0.0969024811976093	0.919183602035048
ENSMUSG00000032410.13	Xrn1	2.0594069831915	1.50122384748	2.3126148202423	4.0642024012473	1.9941316393228	1.1268434171388	TRUE	2.02676931125715	0.601484128108693	1.7471047743032	0.53381572114729	0.63341910211445	0.246818581376106	0.163336393851764	0.22324706400284	0.28799181424088	0.367386603584728	0.42038770476062	0.19470893768995	0.1749691152956	-0.154218822394075	0.656166254167787
ENSMUSG00000051339.10	2900026A02Rik	1.2130912189072	1.1765518234877	21.783951823696	33.57578617087	4.5218731534429	4.0404752950145	TRUE	4.2811742242287	4.57582651751413	6.35178288617565	0.57667223220777	0.66386773094648	0.203144271802933	0.249227064401032	0.55728494817618	0.57052081510997	0.0338643354429387	0.505676776185512	0.46482012767578	0.4448076301971	-0.0634910056257232	0.662285109351603
ENSMUSG00000063077.14	Kif1b	1.8346984609368	1.9441766876595	16.447326305039	29.396377910138	50.721265410147	22.73989903551	TRUE	19.5936126702745	20.3503167662233	6.35945611202327	0.60075579121185	0.75466874764786	0.329064879714169	0.193485032437693	0.40449536883315	0.45082217490663	0.156435295128803	0.421117397546591	0.37200778782731	0.41515868541278	0.15833005693035	0.595246777996068
ENSMUSG00000024294.14	Mib1	2.368563889511	4.9838487710371	16.299436694629	23.47665093786	15.035491603514	8.8813810729072	TRUE	11.9584363382106	8.38824532775868	4.00510708493218	0.59717453735215	0.54211708207432	-0.139548185512148	0.872323175656976	0.57789501765552	0.51069761586411	-0.178338107713206	0.239505167765862	0.61686941548675	0.60169049320156	-0.0359435567693259	0.579088593297532
ENSMUSG00000063317.7	Usp31	2.5598107826356	3.0313650547529	8.4772831373388	11.568177797909	5.1199899178977	4.0533253819115	TRUE	4.5866576499046	2.65543998349246	2.77031651862865	0.57357064642003	0.53912618563637	-0.089348209526497	0.968271228095089	0.30659587395183	0.27841566277199	-0.139097907033613	0.700614380647136	0.62301167690808	0.59540994198994	-0.0653758919747967	0.581125774896534
ENSMUSG00000032875.8	Arhgef17	1.2912610135008	1.9671939775168	26.31019049051	32.847201418379	6.1879172411727	9.1331428068596	TRUE	7.66053002401615	8.942009128765	6.21890676800994	0.56800355005215	0.6179984077611	0.121703174431788	0.498187534274855	0.65005244823241	0.6373640176169	-0.0284385498418208	0.592101675625229	0.58687692943623	0.54533089361195	-0.10592610774846	0.17590391343932
ENSMUSG00000038095.15	Sbno1	10.510085498558	9.8640422354571	9.2728848241889	12.879556927896	7.191780295365	3.7190481716619	TRUE	9.568463529823	2.45985964712697	1.68337164040994	0.54383888121324	0.71021425021978	0.385075008780519	0.166260152635176	0.33578154090611	0.35762118237503	0.0909092693576377	0.656128778621729	0.31210730972843	0.2644090579505	-0.239270545796689	0.360149541540248
ENSMUSG00000026596.13	Abl2	3.0210545281614	4.3985814364386	23.064777108764	29.363013747121	18.161691731713	9.3218392580794	TRUE	13.7417654948962	13.8372508518948	4.59810903116306	0.62177993085841	0.73688959317096	0.245044427457977	0.49856668802766	0.49393466844693	0.48523972450794	-0.0256225700315085	0.855227136059487	0.58291343634922	0.63279470752292	0.118455877026732	0.72099047737161
ENSMUSG00000054823.16	Nsd3	2.1919500100967	1.7656493294593	4.9560365087973	6.8995625440147	4.9873350223483	2.5990020991297	TRUE	3.7775193039635	2.07221890958211	2.83052840262873	0.58948336853571	0.47505996035196	-0.311341493426359	0.512616051760105	0.24917385707943	0.28012045840425	0.168894642439265	0.473408010674193	0.36233027758871	0.40254623631155	0.151849132676587	0.651788888126569
ENSMUSG00000049470.13	Aff4	8.1072004200727	12.65087537922	28.831378454072	46.17586887647	13.586956948137	6.953963507295	TRUE	13.1189161636785	8.28526428491207	3.23324114514615	0.52872305542497	0.73982979318866	0.484681161382275	0.358789596871645	0.37029073751122	0.38125267784711	0.0420890085713104	0.760421775219466	0.40273476721399	0.39029197721296	-0.0452762151306933	0.547805204152429
ENSMUSG00000021928.9	Ebpl	2.2444172562297	12.393414706955	5.5832271015782	6.0411382515971	5.74863006812	6.1317303869006	TRUE	5.89488415985855	0.406605485409495	1.85206026411633	0.53504527299041	0.53333766670009	-0.00461174946381197	0.755455722970132	0.73759206653483	0.72134203691401	-0.0321396376400985	0.371508822992255	0.79880118323392	0.74066356260114	-0.109018105113958	0.0561283384479156
ENSMUSG00000031004.8	Mki67	1.577767549013	2.232467151189	3.0569857084277	4.2514707324284	4.747039758251	3.5767212762541	TRUE	3.3168534923409	1.49668735477277	1.90268513704999	0.60329882818279	0.60749095579837	0.0099901501792747	0.684240677715514	0.23393591141623	0.28679624575436	0.293912792589874	0.661557805997848	0.26033693445549	0.29226838351715	0.166913768391563	0.98287956259072
ENSMUSG00000025153.9	Fasn	21.997477645036	33.950215240422	72.74359786102	102.20933142816	117.72715977008	110.31218815731	TRUE	87.47646464459	39.3529621365051	3.19594325277036	0.59590557792948	0.78851257194397	0.404050005591548	0.335939952646082	0.5430866421375	0.58390887797165	0.104560867682298	0.680104314726293	0.447189644261	0.45486759455278	0.0245598790041522	0.866631408326573
ENSMUSG00000045039.9	Megf8	3.0649600659642	6.2874364837643	32.984010037848	38.826486261916	34.822179156786	39.030350899711	TRUE	33.903094597317	7.45054533793191	4.41908586351041	0.63759059943811	0.7708123395925	0.273749308726102	0.25964955651415	0.7557421990359	0.76206840735693	0.012026325530903	0.851308358629074	0.70787090984439	0.67319272482773	-0.0724667030941652	0.284588912003804
ENSMUSG00000033257.14	Ttll4	4.5926011669242	5.7281058015874	5.7254219403256	6.890187030184	11.042922460902	6.1184270264227	TRUE	5.92326641400505	0.863440361112032	1.12844527784598	0.56537334042792	0.74184975368844	0.391923172373967	0.460516481073007	0.36189976118901	0.42335046803076	0.226262328317636	0.0831218947673332	0.45249107006806	0.48692766364391	0.105818145418778	0.516669194059843
ENSMUSG00000026019.15	Wdr12	8.6622499201336	8.8228068489502	8.6957229465819	9.8912522573987	9.3766580896099	7.7656051302311	TRUE	8.75926489776605	0.529590776032781	0.33570406316284	0.51833061630693	0.63433268261055	0.291367063698039	0.639679512583487	0.53809032781109	0.56374261863379	0.0671882640169949	0.252227417667435	0.51207043989697	0.58905479833099	0.202059571137755	0.122992932262365
ENSMUSG00000039967.14	Zfp292	5.8514819738219	5.4930892629709	3.0106872166047	4.2206484198973	2.2710453815716	1.9594680953208	TRUE	3.615667818251	2.2245094669186	2.31509286646769	0.5363828200302	0.61916665250526	0.207064742472577	0.33166482043636	0.26987851629112	0.31696440749704	0.232010711162103	0.495043432979293	0.25141725447457	0.22796435998335	-0.141275373000754	0.572158435434572
ENSMUSG00000055322.15	Tns1	2.8734035206967	2.1810463972454	30.342824965789	51.554678799663	2.2814830791577	2.9543040414093	TRUE	2.913853781053	1.01200651493156	5.77833846464858	0.38452962468167	0.77367720395822	1.00863701648752	0.316463731525863	0.40211481320132	0.42886130881104	0.092903680718774	0.532225742025704	0.5122412094752	0.42346962303275	-0.274564837816993	0.0375157705779113
ENSMUSG00000055320.17	Tead1	6.4122046159581	6.8231977487597	10.942431511308	22.860082783608	4.2815800663557	3.4028876573571	TRUE	6.6177011823589	4.11490784937701	2.90521890723073	0.46444636380017	0.4426938238963	-0.0692027515275717	0.904157186686718	0.25268089896215	0.28546453023806	0.175994887839694	0.502414433332488	0.53867560485084	0.43576982011957	-0.30585044698768	0.212397948158947
ENSMUSG00000054280.14	Prr14l	2.7880484461512	2.8403845999244	3.7704981369553	5.2124747758843	3.7747425592759	1.9125909593586	TRUE	3.30544136843985	0.73143634605934	1.58885387569616	0.51464180830753	0.629606946148	0.290882794454303	0.163908405724022	0.084472480568979	0.12604910274142	0.577432526566881	0.266793953951051	0.17632582647849	0.32764539429293	0.893891449963574	0.519305017963411
ENSMUSG00000041308.6	Sntb2	5.127897781108	4.6839735005592	10.087906461996	11.592130548984	4.3457390701898	4.2425218061566	TRUE	4.9059356408336	0.90706239346431	1.93785909201351	0.59959421606118	0.61382119064614	0.0338319856055197	0.907877591829668	0.45394724384963	0.45224064357343	-0.00543398714599922	0.940735276516745	0.4580797531885	0.47595254678067	0.0552189436010927	0.94872303679072
ENSMUSG00000028080.16	Lrba	2.3627237198162	2.0761261838935	1.9173006558402	2.1997255181436	2.9247254797699	1.6263988954942	TRUE	2.13792585101855	0.330192117325409	0.853557945124064	0.60032945554428	0.72305939234446	0.268359699059301	0.0402659356788649	0.36122932605638	0.40557238968197	0.167044419355269	0.596617816065972	0.3439845320659	0.274335993777	-0.32639977189619	0.314061667059793
ENSMUSG00000030102.11	Itpr1	2.9467686232675	3.1015164798599	5.5727851625748	9.6956243395927	15.650732284417	12.17067486118	TRUE	7.63420475108375	6.72296710807259	3.59072642513937	0.67607583719878	0.71660647270036	0.0839959881856721	0.562578676523777	0.43657821037559	0.48054883083714	0.138442910310776	0.474913574962826	0.34605803098016	0.35697136286192	0.0447943564797	0.866553246315776
ENSMUSG00000024026.13	Glo1	14.837536997514	34.430816825978	30.010141780075	28.722528106045	54.873640183485	39.18036528624	TRUE	32.2204793030265	7.75239470167855	1.75578342431168	0.54037635554875	0.52760748044427	-0.0344995308311337	0.89642939793391	0.73941245626886	0.72268695540939	-0.0330084939123103	0.443994369758757	0.81414664803725	0.83102681578659	0.0296063478842793	0.543858778312826
ENSMUSG00000038679.16	Trps1	2.1824533492789	2.3670090483166	2.8390192253357	4.2586143115051	4.6422077965651	3.0266815914198	TRUE	2.93285040837775	0.975727540123308	1.40606529853616	0.50949287478296	0.46242871719829	-0.139830977405177	0.877192729995074	0.27429015403062	0.3351786441521	0.289227395035284	0.244567689795613	0.36112607583336	0.38003306269489	0.0736223410559097	0.788358072317309
ENSMUSG00000025326.12	Ube3a	3.8231312789341	3.0722286086496	9.8570370627282	16.001840251895	4.9319890637374	3.1268685298094	TRUE	4.37756017133575	1.89478000128273	3.05312666517411	0.5331426573899	0.60017149129768	0.17085317272773	0.285278881676798	0.36253842299996	0.40416639677797	0.156815473344767	0.469451634583332	0.32312460527982	0.32151897853964	-0.00718671397302771	0.629206041927243
ENSMUSG00000041415.10	Dicer1	3.8893136906569	4.128008353353	7.5699830622433	10.752653405504	6.7488626635404	3.4574400310659	TRUE	5.4384355084467	2.61687595090997	2.29216117439447	0.62331858267888	0.74691006300707	0.260964811843325	0.380750746369332	0.42414791749823	0.39879014840141	-0.0889377082819751	0.635820420260292	0.32022102603897	0.28039345479987	-0.19161536675502	0.46727704170971
ENSMUSG00000022914.17	Brwd1	14.709964876233	16.964046887869	8.8243587563729	10.825057463729	12.490631850393	10.154001419027	TRUE	11.657844657061	3.21526209053469	1.16735289720487	0.50064303119142	0.57056657998119	0.188612947201182	0.542959764156858	0.31604646533264	0.28529324671778	-0.147691083093806	0.0983806637943401	0.59282429608025	0.58152925708561	-0.0277527993305716	0.961662515345222
ENSMUSG00000030313.15	Dennd5b	2.8645818356371	2.0728093907297	1.6139113387777	2.7594307466451	2.3485777119277	1.3030650937638	TRUE	2.2106935513287	0.849173537052104	1.44897193638853	0.52689439926889	0.47740076879634	-0.142312954664863	0.775501915139254	0.26641368863651	0.29845052387839	0.163823574576293	0.31382221674831	0.40191394603378	0.37763804714833	-0.0898825144311708	0.588852453352289
ENSMUSG00000022811.17	Zfp148	6.738353556689	5.2147976227282	6.9612180162511	10.726270480745	5.6782940135549	5.119482907266	TRUE	6.20832378512195	1.29462143771853	1.19966143646617	0.50461660637798	0.52814068388136	0.065734595175417	0.688924227685052	0.22403448229191	0.22811021777282	0.0260102689990514	0.867157018435097	0.24606613822892	0.23000458669341	-0.0973835072984157	0.663024319686203
ENSMUSG00000037697.19	Ddhd1	1.7319522087525	1.8015213735346	4.4867278835343	4.281702874859	9.7628860625868	5.7660616147795	TRUE	4.38421537919665	2.93891368083484	2.93946949399852	0.62210094018963	0.56567003555968	-0.137187935461729	0.683964033463124	0.48347049802325	0.4968969889055	0.0395189421511192	0.802077575160595	0.49791977344493	0.57341680164336	0.203670868492522	0.300484154268561
ENSMUSG00000034218.16	Atm	2.2074569091468	2.9638967099967	1.8934842714115	3.5018838141088	2.2977346784141	1.3139988200088	TRUE	2.25259579378045	0.793496740723209	1.46839481325078	0.5071844047118	0.67600748543447	0.414528836480487	0.168062083622945	0.34722690411492	0.43363469187724	0.320601444404637	0.12035704051473	0.39775871790065	0.29355576299743	-0.438258971744262	0.301266910278403
ENSMUSG00000027806.9	Tsc22d2	2.1419976360821	1.9255355913362	22.448502422493	40.132095145312	3.642016796221	2.7675255974283	TRUE	3.20477119682465	1.73613139492704	5.66104122811854	0.58597363230495	0.59086106970814	0.0119831990524018	0.746956467013935	0.39816658800678	0.37194306155575	-0.0982903779011364	0.509758261924725	0.4935001229913	0.53644675973634	0.120384551956405	0.646000933602727
ENSMUSG00000023087.15	Noct	2.9606512607394	2.2772180690044	8.7661296017581	11.659955114205	3.3197569168612	2.8055393729405	TRUE	3.1402040888003	0.887818490341571	2.88698765250598	0.47658645721656	0.52741562448291	0.146202354937913	0.818855599156365	0.45257430944367	0.48930556695314	0.112581004985362	0.109103937455956	0.44276365729568	0.47404316170701	0.0984816143133454	0.463868185701103
ENSMUSG00000045210.8	Vcpip1	3.5107693582652	2.297720112184	3.3050487750871	5.9343647783132	2.7860960045735	1.216806271661	TRUE	3.0455723898303	0.899233406119994	2.17925810124616	0.44766446198764	0.63140979074141	0.496158837588292	0.11308478064487	0.34621991988732	0.43173943196033	0.318472131088945	0.291334093617634	0.37557183082788	0.55909814080319	0.574012687523696	0.176862928493617
ENSMUSG00000029229.8	Chic2	4.8012179052185	5.9575578049182	9.0015131481407	7.6677422874818	8.5373210168362	7.4393471981168	TRUE	7.5535447427993	1.80265233082313	1.01854881527112	0.589290707524	0.42153936917829	-0.48331214034892	0.126021345403655	0.4395351981672	0.41087531993483	-0.0972780269482704	0.327844495044298	0.65350007697714	0.64154846259172	-0.026629155297106	0.910919154801552
ENSMUSG00000034377.10	Tulp4	2.6431244207158	1.3961819048634	39.830431143913	49.675650788513	27.086488346251	18.084858142884	TRUE	22.5856732445675	27.5669504739061	6.68840309782133	0.47619776630974	0.46583399566096	-0.0317449249316468	0.804403045108999	0.098379820202306	0.10354954461671	0.0738868854588331	0.595467976042188	0.12292727577118	0.19770340115558	0.685532626193751	0.396561760973364
ENSMUSG00000020661.15	Dnmt3a	1.3259190590428	1.3403620446606	5.8388583181545	6.9399557909962	27.089056480834	17.46985555061	TRUE	6.38940705457535	7.49642071693808	5.75732119367503	0.65036266529079	0.59305182425305	-0.1330862592542	0.736951779681033	0.43014608975622	0.43525141635303	0.0170222695565747	0.920224144110047	0.35517328222586	0.40268658369064	0.181134347224296	0.400964102192204
ENSMUSG00000039840.8	Epg5	1.0017898218838	1.6125970686383	7.9512905869925	9.8331575571356	5.9086496545824	3.5447913767887	TRUE	4.72672051568555	4.69887350515597	4.39039817711316	0.63328973947892	0.71368818422369	0.172428182374325	0.560841204199299	0.50653850246272	0.57713993785508	0.188249234602587	0.23083138596165	0.42982068774694	0.50374808914853	0.228967538171159	0.110040309743179
ENSMUSG00000054263.12	Lifr	4.653770790838	8.9833152106974	1.908792349998	3.8314528982065	11.708098268544	6.1242650189921	TRUE	5.38901790491505	3.73451414333306	2.94051584934266	0.61221930555409	0.70284673679038	0.199161589460288	0.611579900655851	0.48672307860611	0.53233842478594	0.129242521876782	0.492904745903261	0.60340491813927	0.60045059266371	-0.00708091499472978	0.631119330271134
ENSMUSG00000038121.6	Fam210a	2.2048999937813	3.1406149087209	7.343254784596	9.9805682467773	6.1115008004274	3.4784022936518	TRUE	4.7949515470396	3.11541693998621	2.92292073347712	0.54103703183912	0.66568547517309	0.299113345740365	0.524852147880392	0.56170587892758	0.53434553577969	-0.0720419367598663	0.487167337492468	0.65145799399381	0.75133628310395	0.205786616927159	0.265994328717724
ENSMUSG00000026219.14	Trip12	25.103862001796	19.720845506444	27.602084424223	44.357902877671	16.965262519764	7.9894434279099	TRUE	22.41235375412	7.88507607777546	2.44223868277572	0.54718792186329	0.76963279201757	0.492133884021778	0.264724101220267	0.225183425845	0.27884505688118	0.308363051606863	0.421492325928347	0.2603079730859	0.30464827491021	0.226925069676601	0.815517541667147
ENSMUSG00000041258.18	Zfp236	4.9992480812073	5.2500433220707	9.5896200517258	9.092990101964	10.102708187996	6.44127554198	TRUE	7.767132821972	3.08237180225008	1.65073816064699	0.5790536254765	0.57906493505155	2.81771977342124e-05	0.974874920736376	0.33597767383695	0.32475479745272	-0.049014529087443	0.806296660023747	0.38943782302458	0.39834756558306	0.032634749764938	0.982178857664497
ENSMUSG00000033400.14	Agl	1.7560827161595	1.4208582543883	7.4772147945986	11.156346837747	8.8190980429601	4.7774580508783	TRUE	6.12733642273845	5.23581326175728	4.12253322109965	0.57771580908945	0.72361131443571	0.324854991904129	0.20193501043977	0.30168039318009	0.35639084153646	0.240439327377487	0.393539101634917	0.34304675115132	0.42513472550256	0.30951490142222	0.364034728450291
ENSMUSG00000043909.16	Trp53bp1	3.3902924470723	2.8774143941735	6.3851263344873	8.1711354147583	21.144789416741	16.670854300771	TRUE	7.2781308746228	6.14430575330025	3.83388375621012	0.66859782485194	0.78267227411975	0.227269677389492	0.318393006293024	0.30816174921844	0.35378790879237	0.199196945218456	0.317489976492747	0.27251589709978	0.27282190696563	0.00161910272484596	0.76716173834055
ENSMUSG00000024384.4	Iws1	3.7743934399832	5.1409458318205	7.3341938106916	9.6036593890038	8.4765369651265	5.1777996585019	TRUE	6.25599673459675	2.47267370711974	1.78213673963536	0.57533984933909	0.7523485403689	0.386986775825883	0.336744068525228	0.56479671750296	0.59301049695457	0.070325938377437	0.633572758261332	0.47940140087776	0.61032940710827	0.348353979781529	0.247846137172992
ENSMUSG00000003226.7	Ranbp2	2.4315791154811	4.2921115024948	9.1629860191229	16.551632503372	3.7784591012231	2.1224751968925	TRUE	4.03528530185895	2.60679352677353	3.50799552867003	0.56597358850927	0.64247577376289	0.182907324310564	0.426878362008085	0.38481898485892	0.43505462319153	0.177016574078112	0.319469802896897	0.32697620086098	0.34347898503231	0.0710362015739397	0.951867748431514
ENSMUSG00000055024.12	Ep300	4.6171300983077	4.5255572743679	3.028045376661	5.1709253978202	4.6771906651019	3.2600148585928	TRUE	4.5713436863378	0.522934288079731	0.916132833467938	0.49963747467986	0.55676920287318	0.156197723643164	0.25697853977098	0.36861624342532	0.4163983440075	0.17584468503436	0.422818037536237	0.30388476880094	0.28285702596799	-0.103451359500698	0.396696484846812
ENSMUSG00000021578.17	Ccdc127	4.7170591909104	6.1332413465768	17.94749749081	23.107510593088	10.67928307406	5.2678199397479	TRUE	8.4062622103184	5.06133345346106	3.36938855769182	0.61367231954045	0.51191243442197	-0.261571460362249	0.72264022385848	0.42159539320102	0.41471997574475	-0.0237215636852343	0.913682086463357	0.67871182731861	0.78014292529683	0.200939301746127	0.161281388036009
ENSMUSG00000078515.4	Ddi2	4.1403700505501	6.4246709827815	8.738770633568	10.711419848674	8.7751488858227	5.3831440072143	TRUE	7.58172080817475	2.51449321651241	1.74680052412202	0.53526296631986	0.69391274894998	0.374506433757793	0.511650251811334	0.5625493150715	0.52524116072473	-0.0989995956357951	0.570787713018873	0.63568764996941	0.68998143664396	0.118239487674146	0.452705174011918
ENSMUSG00000029516.19	Cit	5.6318130999078	4.6772181601022	1.6847902347364	1.7082741968222	7.3513260566302	5.8261872879722	TRUE	5.154515630005	2.12640576930835	2.88584674217235	0.59289026151794	0.67533857215963	0.187845859789939	0.414175561499501	0.3366223955886	0.33751601765708	0.00382480765497461	0.947795254331046	0.25933209772067	0.21190003996337	-0.291416920851995	0.0313507740984825
ENSMUSG00000020532.18	Acaca	2.7136439984551	2.3769366755165	11.978663745599	13.984246587816	21.658968966496	10.801916106902	TRUE	11.3902899262505	8.35489769949323	3.95264967423609	0.68115146372956	0.78351695369664	0.201988854290497	0.450274915876419	0.43622096924888	0.47247908325259	0.115191339987807	0.590527443050068	0.26704689593003	0.28903194448126	0.114135836652421	0.634655139377414
ENSMUSG00000048271.14	Rbm33	5.997409173919	4.8220371030385	3.9656280617978	5.6690094126823	6.9477221653994	4.8673787587751	TRUE	5.2681940857287	0.871303316143715	0.931339559310126	0.54644868271128	0.53245683721692	-0.0374214377388676	0.721161268248707	0.28216145019715	0.30395162207919	0.107320822171381	0.56247842384139	0.23269933086923	0.20916508323835	-0.153825025409136	0.432455233198319
ENSMUSG00000026020.9	Nop58	18.92706185295	15.407443686565	9.7096542145695	14.248226270051	8.762131758457	5.1872915465243	TRUE	11.9789402423102	4.92616973230646	2.24230431951569	0.49581802512131	0.71851790045828	0.535213378477496	0.14945856462064	0.42397055292111	0.45135683131925	0.0903043776650795	0.723716787772466	0.32257283304337	0.47478187957782	0.557639934041633	0.14292099023512
ENSMUSG00000026923.15	Notch1	3.0848636982241	5.0559469914587	4.2878352065559	5.6075852956111	80.172080683676	44.236665069276	TRUE	5.3317661435349	2.43949478629143	5.69499486455728	0.59907950964573	0.78940975270389	0.398026853251984	0.230515428323601	0.56827173901085	0.63435798794871	0.158716258047471	0.203596798653678	0.50088134390055	0.50825332909993	0.0210788826778431	0.741375161126566
ENSMUSG00000074212.7	Dnajb14	2.1118281393912	2.7809722410967	7.602570260514	9.0503803351142	3.7348440069227	2.1324573955888	TRUE	3.2579081240097	1.68388571757611	3.02136961332068	0.62773969949457	0.48005261440091	-0.386973914898599	0.226837261235363	0.48012901040454	0.48009409052438	-0.000104931318375311	0.928947311463363	0.60361139922489	0.58633342191778	-0.0418987565327558	0.527438703628138
ENSMUSG00000032423.12	Syncrip	10.44421241007	7.3572484176314	14.133568760198	17.508605385719	8.3498939300748	4.3741600258977	TRUE	9.3970531700724	5.02328626994462	2.26364386638383	0.52239824301295	0.73759407331921	0.497677018876945	0.203345193670535	0.41643243839214	0.47544197927888	0.191186838968701	0.420639001612525	0.36140261000414	0.45192605895147	0.322479822858275	0.589912624323219
ENSMUSG00000027784.10	Ppm1l	1.3636536144027	2.6544286560677	8.3335955472422	13.615914646587	31.522173758048	15.824235541604	TRUE	10.9747550969146	9.76277784424806	5.41678117383132	0.55339511268859	0.74030870467891	0.419817089308823	0.363716176126467	0.63762242633559	0.63982788375364	0.00498149417798286	0.880372599888645	0.65256742684805	0.73447813125271	0.170592559288315	0.373620942565911
ENSMUSG00000026516.8	Nvl	12.502080425093	8.0873426441073	7.6497171482849	8.7771559909052	10.472965455855	7.0054166039795	TRUE	8.43224931750625	1.63780218758117	0.975192192567552	0.51665998039344	0.6595220931823	0.352205849425706	0.463891234215559	0.27909252976957	0.36018756143152	0.368004851130076	0.226634885182964	0.2799107648835	0.30675981624053	0.132142538990295	0.981257178104696
ENSMUSG00000066440.5	Zfyve26	5.2928208107143	5.722179176133	7.0743591798741	8.8426670648977	5.8376541350794	4.6262811428862	TRUE	5.7799166556062	1.2162741553977	0.957940043955348	0.54027892481073	0.69899438535273	0.371576460806974	0.33693353954256	0.55113359252071	0.56421694890823	0.0338479401585339	0.907483299604509	0.33129469727886	0.33626575891473	0.0214867686365735	0.49876034814205
ENSMUSG00000072501.5	Phf20l1	1.1690667035169	1.225847794841	4.279452381337	5.8513048957049	3.0977500277359	2.1668543153036	TRUE	2.63230217151975	2.12730108186247	3.2180508842808	0.56444056657751	0.53921846534022	-0.0659517768193869	0.777715118565742	0.28065640582998	0.32218016944805	0.199062708867993	0.429487326562296	0.39529286661064	0.40838584520019	0.0470109419973746	0.978981407742113
ENSMUSG00000030201.15	Lrp6	5.4915894809464	7.7503531065935	9.7972677062548	18.393367083219	11.841593303623	6.008370300519	TRUE	8.77381040642415	4.32416821220099	2.12160215813739	0.67448804058135	0.62331175651301	-0.11383893861339	0.82965777016632	0.44758691495918	0.46420479162714	0.0525935543191532	0.745133425117521	0.38831472145151	0.3185858627938	-0.285544153609533	0.210335224259129
ENSMUSG00000022016.16	Akap11	1.2080462576432	1.2573508878609	6.0346710626747	12.199122197123	5.3788679845764	2.2985874882381	TRUE	3.83872773640725	3.54142744558947	4.73105705848495	0.61620274974025	0.77219991285261	0.325569271195807	0.140451088974677	0.34293653325582	0.40752391177905	0.248943109350826	0.441405368678949	0.45821770732908	0.43342846555506	-0.0802393051058208	0.636571180316341
ENSMUSG00000005534.10	Insr	1.178203116254	1.7135785613334	6.2883580669113	11.195267621151	10.263820855252	5.0526065650395	TRUE	5.6704823159754	6.26337932406959	4.26033766024592	0.71322339792219	0.70719263728515	-0.0122507779820778	0.716389923669168	0.38107191392912	0.45690749036351	0.26183881233125	0.292027529356333	0.3419581242808	0.3511141664015	0.0381205403152268	0.941635825434791
ENSMUSG00000039477.16	Tnrc18	6.0939720292288	6.2401596598759	13.939865166753	21.298661016052	12.263468168713	12.37745755866	TRUE	12.3204628636865	5.70779169224799	2.06434318523741	0.50800592705795	0.70847791094381	0.47987754377733	0.254586914081335	0.55396542863785	0.52621258486949	-0.0741501923790084	0.59654576329267	0.42019823898174	0.40649108837884	-0.0478463917722373	0.450966633220624
ENSMUSG00000001151.10	Pcnt	5.6796592546784	5.9919702512568	5.2873502038241	5.3041356029902	13.481848818709	7.4167957248478	TRUE	5.8358147529676	0.800710524158324	1.32481637814122	0.74465649311505	0.87594961452524	0.234272817072886	0.293902551675129	0.41524410470721	0.44802231363182	0.109610900973341	0.698271470403544	0.26086441900388	0.25974121671156	-0.0062252145583533	0.918727181131798
ENSMUSG00000021427.10	Ssr1	19.285579589569	55.791850779798	89.848665255032	100.96892557879	43.079689345645	26.623109488136	TRUE	49.4357700627215	39.2613614816882	3.13037847253444	0.61233349825808	0.63247773969425	0.0466970952860958	0.909578160130662	0.62981445553942	0.64741630822344	0.0397668363849539	0.489046167236413	0.74415799480488	0.79271052831013	0.0911851800205657	0.495124427324199
ENSMUSG00000079259.2	Trim71	13.907675737054	26.954285366169	1.2991350376191	1.0050968913436	1.5918774947431	1.0549476908687	TRUE	1.4455062661811	0.615996541446121	6.07122351230425	0.56980119332423	0.7569646530035	0.409767291050128	0.443397823876875	0.39058131293819	0.44481149077649	0.187571131314278	0.347778605942737	0.4892788488956	0.52122893453216	0.0912602555627322	0.851668652776944
ENSMUSG00000035133.9	Arhgap5	4.8986891358942	3.0956759903181	8.496166782827	13.419288127809	2.3382646554419	1.1346716364026	TRUE	3.99718256310615	3.35173519491685	4.21951717369951	0.49402260777747	0.70304984762132	0.509049917998408	0.231730737537141	0.10178146364728	0.16665577480689	0.711396466338374	0.400091344568717	0.089767158037476	0.2930922592595	1.70709523988058	0.0637722045156777
ENSMUSG00000050310.9	Rictor	3.0015845073368	3.1382365833675	19.887127036295	24.052569178767	1.8407267026346	1.109745818426	TRUE	3.06991054535215	2.36426409467688	5.50054374595655	0.56517808683979	0.64739234655136	0.195934779768352	0.454725033334688	0.31569886345562	0.36912254536011	0.225550790738972	0.334233123710777	0.37107743251695	0.3463096654489	-0.099657611123038	0.636695656792062
ENSMUSG00000040661.6	Rad54l2	3.3297311290821	5.5252452678661	11.866051468417	13.36052172743	13.760729987105	9.2559340983417	TRUE	10.5609927833794	4.44725599534657	2.55032053909535	0.5910516175016	0.72063213800196	0.285978864195836	0.538095594508435	0.56756745393089	0.55372793360037	-0.0356145606589578	0.769257716494812	0.56977431337331	0.59910607934896	0.0724208897373908	0.618982552030811
ENSMUSG00000034602.15	Mon2	3.3254930526451	4.8687211937219	20.308684892163	24.311393340525	20.637370865713	14.420747555748	TRUE	17.3647162239555	7.5755906324478	3.77598004015102	0.62788446047608	0.7013584403883	0.159652837488171	0.555216297375635	0.53486489957443	0.56798565324007	0.0866799589763756	0.577021579272029	0.41150280667696	0.46029636636508	0.161660783139098	0.256734811618725
ENSMUSG00000018076.12	Med13l	9.0514543675747	9.4114287101617	11.562439148231	12.203551173841	7.2621091719565	5.0024514603405	TRUE	9.2314415388682	3.18783461141229	1.39588976122534	0.5549696430482	0.61716027353735	0.153236341044324	0.117016546680398	0.29177085861675	0.26533446326274	-0.137023723691006	0.585870313570419	0.32893209542245	0.28710687202279	-0.196201922988017	0.36181982384618
ENSMUSG00000090112.8	Shprh	1.9198392613318	1.8430755629173	2.3784031278582	4.0839073008305	4.1243958795671	2.2919651396007	TRUE	2.33518413372945	0.672695237451425	1.59731633392769	0.53497281851657	0.65971745706925	0.302382689847097	0.274165527160653	0.30292721629242	0.35966372584042	0.247677460776838	0.150337368431427	0.30276981023893	0.41081744688336	0.440276093748397	0.340538273134709
ENSMUSG00000037487.7	Ubr5	13.369771879489	17.603357549528	17.207289606058	24.792495302054	17.459247680418	7.8469069878849	TRUE	17.333268643238	3.13835705719991	1.44005123654228	0.58720981419226	0.81894748736068	0.479894865659941	0.269525901940901	0.41535611322291	0.4084392971	-0.0242271095443062	0.975960383496598	0.31789781210889	0.29285793312227	-0.11836211172645	0.498303107935791
ENSMUSG00000001569.10	Nom1	3.5524294193433	3.448242870985	7.5284916618184	8.9879114008561	9.3822921458496	6.5996217586894	TRUE	7.0640567102539	3.1446614105505	2.06089046685808	0.54480272383154	0.67739113419355	0.314255188364871	0.715423285600677	0.70356971816778	0.70736099213219	0.00775327274617066	0.940942498269186	0.65464937584361	0.66043274555826	0.0126892343229538	0.93556917343902
ENSMUSG00000049553.11	Polr1a	7.5849887117544	6.7578734174227	11.954157012911	14.673993792472	21.654333839913	22.180620456535	TRUE	13.3140754026915	9.10708449567143	2.44254289728334	0.67974007104141	0.73567210958935	0.114079724738289	0.573221833490339	0.32179331552546	0.41723755927392	0.37473467566373	0.191661021305197	0.37160941332021	0.3843006781259	0.048448474730553	0.63939161567967
ENSMUSG00000021745.14	Ptprg	5.1832846103876	7.8283163819738	14.188040394343	23.975327663012	17.943552279608	10.397025472974	TRUE	12.2925329336585	7.49842437091623	2.67194934901479	0.64729927781648	0.69100633070637	0.094266033754959	0.624910592096707	0.59880292879667	0.5924272278799	-0.0154433295284665	0.834225923221334	0.58289954929912	0.59354063911498	0.0260995269437475	0.752401758392692
ENSMUSG00000051586.16	Mical3	9.4857188405483	6.9798855969096	2.7670084479918	3.5206397791344	6.2332205123673	4.431278072956	TRUE	5.33224929266165	2.56433892471676	2.25761552057134	0.56239391178792	0.54323962522624	-0.0499922594328983	0.744195845255171	0.46139060202939	0.47858512311506	0.0527869328373882	0.397256946789127	0.40410919404418	0.36508093709634	-0.146528835588678	0.318078649173497
ENSMUSG00000034973.16	Dop1a	1.1509549720442	1.0975543648502	2.8119835179356	4.374287695168	2.5259682006081	1.174764389415	TRUE	1.85036629501155	1.07653309754431	3.04151422563467	0.59383940032498	0.66068650916156	0.153893068930251	0.425215523770312	0.2972062141349	0.39174876147897	0.398464432822572	0.0875534423254404	0.31042402591148	0.23503402132407	-0.401370619291331	0.401444319595646
ENSMUSG00000031529.5	Tnks	3.3036336313911	4.092014840258	11.082038543899	19.499798636281	11.713202346155	5.4621142145369	TRUE	8.27207637921795	5.64958629812145	3.53455002751273	0.63910919671618	0.5867789953515	-0.123245219295975	0.801585208419273	0.37186686211565	0.42981141276111	0.208917599174778	0.213760730499951	0.44988061328037	0.40661466545206	-0.145879948062835	0.396686029882933
ENSMUSG00000026490.18	Cdc42bpa	1.7298930983398	1.5455506793943	11.466374358211	22.663893744584	4.6057039940036	2.2260388267376	TRUE	3.4158714103706	2.63628448058116	5.30382380917303	0.59848028041769	0.62485118097965	0.0622089161530871	0.559388386521514	0.38668736647512	0.39934154914322	0.0464555530576559	0.704375088887233	0.46857987959596	0.39624623725545	-0.24189777196636	0.281849222726936
ENSMUSG00000058230.12	Arhgap35	6.071099699403	8.2841572329905	40.496177643425	46.267891649566	67.567225708436	34.360875415215	TRUE	37.42852652932	28.1573423230074	4.29397560833777	0.55550730765508	0.67606271892211	0.283351202501207	0.587789547707562	0.41357946037678	0.42123431326185	0.0264584226505594	0.798771387345538	0.66300943085386	0.69001667334066	0.0576018313002517	0.799838414076656
ENSMUSG00000027787.14	Nmd3	7.712862324995	5.9519387306605	6.6491176569924	9.6149251660035	5.1480516887089	3.6414145900148	TRUE	6.30052819382645	1.90129412467889	1.48598256214706	0.55252501033153	0.69051932587996	0.32164202209145	0.824736926900781	0.36458378625963	0.41584706227049	0.189802636824334	0.479079207067489	0.2444892039787	0.32363091656713	0.40457867463865	0.476918882342434
ENSMUSG00000032009.8	Sesn3	2.4764845672782	2.8386229228105	6.544944140891	5.9879456791731	32.67216837072	17.057681781465	TRUE	6.26644491003205	5.35054204121076	4.46190962216228	0.60831275052087	0.46405145694629	-0.390528454762785	0.258079128126828	0.48539541259914	0.47539649587625	-0.0300292045675366	0.944356615937352	0.58536361631486	0.58074249518701	-0.0114344713033673	0.702391683743395
ENSMUSG00000022656.15	Nectin3	3.2396745432247	6.4014864169582	16.949754246421	27.722976536047	11.725380013051	7.660225726969	TRUE	9.69280287001	7.22355691529324	3.54622606371258	0.60604218622191	0.58845879001605	-0.0424768359628459	0.983270913537628	0.43706998974805	0.47280441990938	0.113379199605008	0.340703719183715	0.66056768351393	0.70508425833617	0.0940892800411735	0.457191448714794
ENSMUSG00000008575.17	Nfib	3.3409143727004	2.1824001804322	3.3515706790579	4.8873332495158	13.946388124075	7.7843187006546	TRUE	4.11945196428685	2.01306640401449	3.07787975245525	0.47325764240096	0.53845171604026	0.186191177963248	0.462882590714148	0.31611957136754	0.32754748548461	0.0512337162840931	0.84404798090941	0.33413382292093	0.30221517137589	-0.144849941396772	0.462210824645404
ENSMUSG00000041642.18	Kif21b	2.7482397029263	2.8516732992091	4.0392865933101	2.2354684168617	20.630960781011	14.248777976321	TRUE	3.4454799462596	1.41384573912564	4.21621480377486	0.56763744090219	0.60759843518502	0.098148402789791	0.485335872669029	0.59461493335652	0.58669899536491	-0.0193351744120547	0.794383762298707	0.5157019630119	0.50692010409834	-0.0247791558022173	0.686838091089909
ENSMUSG00000031540.13	Kat6a	1.8171297997984	2.0174798841281	3.2455313047006	5.0974542120251	10.468861148085	5.4048538441301	TRUE	4.17149275836285	2.51106031654948	3.18805745632871	0.62029013130956	0.63528975947449	0.0344715917603184	0.745014619504372	0.3738506923953	0.41054423303968	0.135075464861154	0.507830759169136	0.44833562465038	0.4204262738747	-0.0927263091137544	0.426583418463731
ENSMUSG00000020315.18	Sptbn1	4.0738631686774	4.8497827040567	35.800308031688	75.355738264741	25.404357565797	10.904116133673	TRUE	18.154236849735	20.3003728679593	5.76243131529304	0.55790679477065	0.74383639857642	0.414961223770091	0.302062230980808	0.25971522917505	0.27707073086775	0.0933237025793769	0.598199898668861	0.28723533931195	0.27125903517926	-0.0825620665225747	0.945863701941947
ENSMUSG00000025278.9	Flnb	7.7946849230708	11.256302561669	107.39859770389	194.0577273768	21.508567357369	23.299942934946	TRUE	22.4042551461575	19.0940516572555	5.55033209696283	0.53910527298496	0.74589726874379	0.468409923418236	0.434675803688722	0.44008847763983	0.53549050159136	0.28306738530167	0.156035866594493	0.37064832550224	0.38592333436448	0.0582632835785133	0.357414454724929
ENSMUSG00000027288.16	Zfp106	22.328444948063	31.864101571447	20.513894704979	24.277519043632	25.804518067543	11.179554069961	TRUE	23.3029819958475	3.92193909866869	1.36052995752297	0.56550637562819	0.68793901316828	0.282737383974011	0.549739351666172	0.40380743680756	0.36691709205373	-0.138213369584026	0.667765030403241	0.57186318397406	0.63364183144639	0.14799755252337	0.754880393568372
ENSMUSG00000078671.11	Chd2	9.4126019714763	7.9219958438138	5.6557627182687	6.3258167574966	8.5918305376746	4.8393132909704	TRUE	7.1239063006552	2.17650707452559	1.30841745352768	0.55330046117377	0.56952435796308	0.0416944195539278	0.745619448712727	0.16843511498011	0.18660780078388	0.14781635693933	0.554589957626365	0.14492318169448	0.14565683288225	0.00728499639519088	0.997762948485481
ENSMUSG00000092060.4	Bend4	5.4451598048929	6.72980592026	1.3224770501093	1.1805759049847	2.1567819609043	1.3610827055009	TRUE	1.7589323332026	0.752279921594993	3.61610129231293	0.57795987014869	0.71024962944565	0.29735684907531	0.518473585095555	0.38898713908331	0.30393216095631	-0.355973113294018	0.564883051091692	0.5226787057361	0.53733610339487	0.0399003912175962	0.97346781294677
ENSMUSG00000018501.17	Ncor1	16.04235528758	13.295726736363	9.3682950420748	13.63594859599	18.35785758738	8.9011547215731	TRUE	13.4658376661765	4.94748085999301	1.28704488544841	0.53422271880602	0.7019294503259	0.393884704573074	0.135139993403227	0.20458706981769	0.19033554232086	-0.104169979138745	0.68586795210503	0.36056992629198	0.31377476144641	-0.200549758888181	0.438865865138056
ENSMUSG00000030084.11	Plxna1	8.1902141532502	22.262699943291	77.560656643206	153.35690917813	40.756171669097	38.533714696038	TRUE	39.6449431825675	36.2028475427086	4.23404928144312	0.69486214760196	0.63104676399174	-0.138979871954503	0.88204908198345	0.72987547804593	0.73112042486225	0.00245870509180536	0.899674501104289	0.67271310810976	0.62806805540107	-0.099070476683503	0.213593064576876
ENSMUSG00000037470.14	Uggt1	6.4075232612958	7.6200202868003	39.430919268291	58.199992243432	42.830181928057	22.981985607485	TRUE	31.206452437888	26.1012928246636	4.47271600614697	0.80035438529914	0.91809082248616	0.197997933976318	0.241578802627347	0.6608768891368	0.69893492387856	0.0807765904467004	0.40539395794973	0.41269842051826	0.43771250440382	0.0848956820622927	0.861191790118364
ENSMUSG00000030016.14	Zfp638	6.7227909206215	4.4650645189321	4.350687380145	7.4252152983315	4.6709680382007	3.1477535515406	TRUE	4.5680162785664	1.21394667194401	1.33844484808201	0.54225535229885	0.58494779432204	0.109335484157568	0.609411743969745	0.18098104892711	0.24341181634313	0.427560568630334	0.301121704144527	0.15345642217979	0.18794791752912	0.292503906223948	0.684792764068386
ENSMUSG00000030852.17	Tacc2	8.7262694146714	7.9443811832237	6.2450560294126	10.063631419958	20.765809751583	19.890425486775	TRUE	9.3949504173147	3.41032368298348	2.26188145865086	0.54725798359151	0.59729442909129	0.126221169860705	0.271284916411266	0.51163388635814	0.53226636694748	0.0570365881110459	0.663599455518188	0.33395400068165	0.27830804456196	-0.26296678670915	0.583733576797624
ENSMUSG00000054414.4	Slc30a7	3.3355448456028	6.5399030863093	19.538655350912	19.029044541212	10.391640557305	5.9859618684481	TRUE	8.46577182180715	5.64132037588535	3.38738756736871	0.67103528970091	0.56753946697542	-0.241667918036839	0.71190421298349	0.70196721436223	0.69092410662231	-0.0228764015539188	0.251074092724316	0.63927761257394	0.71318582914085	0.15783546546963	0.375520060388999
ENSMUSG00000035247.16	Hectd1	2.2354237084613	2.7837685980731	16.111579803557	26.824915473915	16.701858361917	8.4067842763272	TRUE	12.2591820399421	10.3174799419375	4.9271139446429	0.63008206630076	0.83865346356855	0.412535056354265	0.1725511837681	0.45128082896162	0.49240996492164	0.125834465842665	0.545111556517407	0.34337131004059	0.34868201319341	0.0221424426245815	0.944043934948824
ENSMUSG00000042272.17	Sestd1	1.2348382717177	1.504428711058	5.9961011215505	7.400019597769	4.6998281952814	2.645877234271	TRUE	3.6728527147762	3.32967675789809	3.74776213986053	0.58860997790964	0.5812721870465	-0.0180981189967273	0.923390285559384	0.47710951585109	0.50621838521117	0.0854394443935682	0.542933778546615	0.51428018095066	0.6142028492679	0.256160647980302	0.0992183652930545
ENSMUSG00000029655.17	N4bp2l2	8.3227661017136	6.6482375252366	6.8122024695461	10.487634542429	6.6939231086529	4.7246125548014	TRUE	6.7530627890995	1.2413280337424	1.03956958865905	0.51307347273867	0.5760147546761	0.166940330628089	0.811049934285992	0.24966735145423	0.31334444797976	0.327742255845934	0.186272621739158	0.39807260084379	0.44369320177429	0.156530873686623	0.834599443877828
ENSMUSG00000031561.16	Tenm3	2.3893910304236	4.2886955490409	15.94449584919	22.186181741769	13.151097653925	8.8947621251937	TRUE	11.0229298895594	8.64044476250053	3.93260482818589	0.76939324747302	0.80261971942739	0.0609954339062748	0.403210692760788	0.61755701205241	0.66582069748382	0.108561387762839	0.59454497584063	0.48085690809927	0.44445345459626	-0.113575304486873	0.39782654477292
ENSMUSG00000013076.17	Amotl1	1.6809748322019	1.8402776822041	54.867746311579	60.679843538144	66.20357333046	59.574073755686	TRUE	57.2209100336325	9.2229557088326	7.25135045675824	0.62595833272266	0.69826146436483	0.157700728976666	0.496683755133144	0.41074736958464	0.4118447819827	0.00384937386225436	0.990461827222275	0.38820087338702	0.41977844095728	0.112824710511518	0.581585963627161
ENSMUSG00000075376.10	Rc3h2	5.5519123375826	5.6917052013914	15.608479196451	24.260656358531	4.653122822664	2.764218253293	TRUE	5.621808769487	2.8364187420345	3.40724128196348	0.56990218693139	0.4889687942429	-0.220971932859102	0.883148900700688	0.26355463209904	0.25715213340099	-0.0354799256340638	0.928128948731196	0.54617628048706	0.49162839364026	-0.151798421736436	0.560361146666728
ENSMUSG00000041498.13	Kif14	2.3617665234945	1.9916915081036	1.1645804531577	1.15731454029	2.9028654394587	1.5521096761333	TRUE	1.77190059211845	0.88747403394067	1.8760142266701	0.54586582035656	0.70136565881452	0.361620428304626	0.204666970728808	0.31765765790222	0.35116939147918	0.14469430340872	0.932909691232445	0.31070191511483	0.34186604642575	0.137900009765345	0.685354309146776
ENSMUSG00000014355.10	Anapc1	8.1653718521028	9.2607131649862	37.575568715313	43.067314403559	54.633056515571	28.426614431292	TRUE	33.0010915733025	23.4978665957728	3.71674838099314	0.68329054417626	0.73427234469476	0.103816101986841	0.623963582056456	0.55278783859839	0.56391894963313	0.0287619467205027	0.982578342389129	0.37324498514872	0.36533607400033	-0.0308986614328037	0.709566605817761
ENSMUSG00000029202.12	Pds5a	9.872743435995	10.549703195195	9.9908729667481	14.490055684424	7.8580950797052	3.8191615622655	TRUE	9.93180820137155	1.99528909601259	1.63987939368174	0.62143348679532	0.58892687172016	-0.0775114824341486	0.761759136330922	0.335006355388	0.35186092028048	0.0708168237641491	0.769098652699489	0.35716864190148	0.38676939471027	0.114868215345236	0.958271705948556
ENSMUSG00000027665.13	Pik3ca	2.8003923945259	2.8946805224852	11.050148999126	16.188437979982	7.7153519082409	3.9464476050407	TRUE	5.8308997566408	4.42313442581532	3.76450316069314	0.59579414075109	0.62538037807049	0.0699200182982485	0.649030132143343	0.41325300637473	0.40613678354046	-0.0250596179020013	0.961785047510731	0.56344060443542	0.66767832557911	0.24488967218735	0.319977083877717
ENSMUSG00000023026.16	Dip2b	1.508638628179	1.9541435980674	12.737962576564	17.237043677982	37.228911736686	27.47322675058	TRUE	14.987503127273	18.9172963409576	6.15161195687162	0.64724619859045	0.75126257136808	0.215002640679064	0.624166667810768	0.53884480281018	0.58289689458963	0.113370905476499	0.448994124546094	0.45678058944016	0.4426870464539	-0.045214186632267	0.549054693697019
ENSMUSG00000047789.5	Slc38a9	1.4619648197453	1.3315826785158	3.5660390262049	2.6816645556623	2.7195949071781	1.7088400854267	TRUE	2.1952523205445	0.932281183813935	2.05641176167517	0.61278603041191	0.56826500238823	-0.108819541559823	0.567724771218714	0.49846046490519	0.53560293512207	0.103684784037755	0.0647855378743689	0.37497174412787	0.45797434336758	0.288484892048858	0.0409807963321569
ENSMUSG00000023830.14	Igf2r	1.3500314742337	2.2658123756658	80.363420909276	150.38217565338	14.058482012473	9.6087200371412	TRUE	11.8336010248071	14.8640718334485	8.66223262677605	0.85393358062846	0.93975041411655	0.138153785332161	0.217569869307709	0.74899080939985	0.80469887524603	0.10350100019828	0.272863827878123	0.57157254809146	0.5209716788455	-0.133731680681939	0.350967105236277
ENSMUSG00000033014.12	Trim33	3.0453918475289	2.5410050658882	3.4746703293939	5.2136528487012	3.8891378992583	2.0669628591416	TRUE	3.2600310884614	0.999370869377255	1.4826982628127	0.60512067793449	0.74782084362592	0.305469798558779	0.114292121568547	0.22413759872343	0.2304807136947	0.0402613540595736	0.928169162709242	0.20647922720778	0.20933709043357	0.0198313045915146	0.765146158833172
ENSMUSG00000060012.9	Kif13b	3.3224779724591	3.4497211888328	3.5979082532211	5.9492198523245	7.8101863355475	6.573458729935	TRUE	4.7735640527728	2.05705482637527	2.00237212220171	0.63659654568083	0.73419587471322	0.205785679670687	0.518870533056557	0.4860279154015	0.49153372396669	0.0162512242398458	0.920360151742117	0.39357064613932	0.42967309760182	0.126616827402933	0.115031094476347
ENSMUSG00000039218.17	Srrm2	12.990956294428	9.737280902332	13.727752086581	23.703782004468	28.999786173002	13.738216094719	TRUE	13.73298409065	3.5120799788395	1.69346967577278	0.52735123242591	0.70672136112322	0.422377354035225	0.161479839715216	0.23570361126286	0.29759103198032	0.336357188352729	0.375588110940399	0.20871829349402	0.22005803794897	0.0763270156217585	0.956889791525046
ENSMUSG00000029478.16	Ncor2	2.5380779879823	2.5583589741163	6.64277507294	10.620523036348	14.475061755367	10.926123420644	TRUE	8.631649054644	6.03261568256176	3.6620691874776	0.49348402230078	0.47249501840328	-0.0627042559816971	0.952037786683333	0.41913765156827	0.39842164694738	-0.0731280923867072	0.583621959882452	0.24086701696849	0.21309905624868	-0.176712648341133	0.21908719553453
ENSMUSG00000047412.16	Zbtb44	16.590130883869	18.636222228549	3.3102842678138	4.41431084773	1.9178810618048	1.1248241906879	TRUE	3.8622975577719	3.47068495547978	5.25288506187921	0.46988339012015	0.5404414022187	0.201835430202886	0.684556377668643	0.34490142565958	0.30529595273496	-0.175975628162513	0.151818586188253	0.62864444685619	0.64111730386157	0.0283440696517199	0.967464029839047
ENSMUSG00000025571.13	Tnrc6c	4.4439513238779	4.6408354710838	7.8404523171543	8.911139842132	12.121642513626	10.595608609206	TRUE	8.37579607964315	4.41427332728999	1.9569994340647	0.57512500057012	0.70293749375506	0.28952085565887	0.352344138620841	0.45588329257934	0.47169214377804	0.0491810347828492	0.878515654774466	0.36258590398655	0.31365817808792	-0.209129660580358	0.0362585659751769
ENSMUSG00000021027.17	Ralgapa1	1.6672398972163	1.7619825453055	3.0600816641182	4.7489739279639	3.9869487260858	1.5907657264347	TRUE	2.41103210471185	1.1594366296333	2.51757177731454	0.61223621155968	0.62713768247762	0.034693831025376	0.645445522629679	0.24029127322397	0.28138455372695	0.227758881350342	0.47833352525379	0.2590687369884	0.29442327684837	0.184556804719488	0.957298414773535
ENSMUSG00000004356.8	Utp20	5.2342685536544	6.3691553494497	12.66471650467	18.060434098667	14.382900895563	8.9388840592185	TRUE	10.8018002819442	5.94058957333379	2.4014788157963	0.59879291148831	0.80010044945187	0.418123993165321	0.43903722089846	0.42541687820771	0.48395973826601	0.186009758684737	0.383547748015217	0.38106773499002	0.33218371925087	-0.198066093610618	0.346591174455165
ENSMUSG00000027782.10	Kpna4	6.0397603120285	4.8849252371127	10.411779890309	17.894909900516	4.282624414034	2.1736918773955	TRUE	5.4623427745706	3.31240213074168	3.20867145269193	0.4877740457383	0.56895892845817	0.222111517250056	0.51803082796065	0.42340195828314	0.45589522949277	0.10667437086615	0.461938660718648	0.3540034997892	0.40699390129275	0.201243552897191	0.847996507670059
ENSMUSG00000009575.14	Cbx5	18.577562761649	24.040340074814	42.485361715677	48.298673064201	70.30078725051	32.869554210284	TRUE	37.6774579629805	17.9827022450326	2.28511204050342	0.5682612594562	0.71418728025252	0.329748074906562	0.518754208890924	0.50806057348473	0.51484383329987	0.0191343759682233	0.923714108538146	0.66368266235435	0.75964999511936	0.194841270593788	0.330994035580315
ENSMUSG00000026502.13	Desi2	4.1581081321634	5.1721756828594	20.369222312907	22.352702525838	16.29808050248	8.836606724551	TRUE	12.5673436135155	11.2655706668543	3.66476305229365	0.69146451629654	0.45041947280474	-0.61838601864826	0.276085439530053	0.40555393447738	0.38324978234331	-0.0816088181723971	0.0496677551295622	0.73092946536626	0.76978831732271	0.0747295833409578	0.42776947699697
ENSMUSG00000026924.17	Sec16a	4.1065172579501	4.6740763950334	31.049850025331	40.950778045002	21.639872045715	18.854496307213	TRUE	20.247184176464	19.5523609921396	4.33114404558101	0.68193246771298	0.77732444637439	0.188888013677415	0.423493421851251	0.44757630646462	0.50632669306322	0.177934877986484	0.373174179160014	0.42685580982774	0.44941267755001	0.0742920067269836	0.97943029612322
ENSMUSG00000021149.8	Gtpbp4	12.294155459824	7.8541033629447	10.412767850242	14.734570002124	10.231688434141	6.9098307941744	TRUE	10.3222281421915	3.29141061941662	1.2228822676745	0.55823213524384	0.67364196362911	0.271116834856566	0.513657884219322	0.26554656645639	0.29325735003426	0.14320239222868	0.457693362386023	0.29257950614762	0.41415584158054	0.501345018853757	0.267554760164365
ENSMUSG00000021690.10	Jmy	1.3190327625179	1.7543928646028	3.2079104904676	5.5074129430022	4.0465267806098	1.6896428245248	TRUE	2.4811516775352	1.44822426443893	2.90603498490191	0.50612388477431	0.6182629360012	0.288729961660688	0.641052374633883	0.53872095775501	0.52693822234286	-0.0319043593508396	0.809848253398191	0.58574446584478	0.53864775006298	-0.120929290883075	0.371915492916022
ENSMUSG00000074582.10	Arfgef2	4.9550186235734	5.6454367426381	21.612543428625	28.97346013755	12.889588230649	7.9729007074029	TRUE	10.431244469026	7.60724548680529	3.58877710648402	0.57787896009483	0.765652171804	0.405921794902448	0.298987512673116	0.51085856860021	0.53208015048257	0.058719648321174	0.617227430403611	0.41803503353598	0.38399801859475	-0.122524986058833	0.344567244695248
ENSMUSG00000005417.17	Mprip	19.910336128979	27.403193826304	238.31520027195	216.99194162013	103.12699107193	100.09910967737	TRUE	101.61305037465	115.577988729605	4.5813561757409	0.57000120649343	0.5519790126003	-0.0463515592069208	0.966874889486774	0.52566258809916	0.53009780341783	0.0121215018839709	0.924252354485798	0.72843245231018	0.72155859504056	-0.0136786418133023	0.949706801470947
ENSMUSG00000028403.15	Zdhhc21	2.8014607776252	2.8318633745177	3.5469356448715	4.9919373254316	3.2734543875287	2.2538732572889	TRUE	3.0526588810232	0.552620519089682	1.17602782047522	0.64435941837181	0.49596077364063	-0.377639616275383	0.683052732437899	0.3087886088165	0.29619267964541	-0.0600835476089558	0.723823890196627	0.45955474238638	0.38422638057683	-0.258280149972515	0.335432462833777
ENSMUSG00000030172.15	Erc1	3.1395534369787	1.9747121877069	6.30214662749	8.6627312552472	6.2815655405622	3.3645168838253	TRUE	4.82304121219375	2.34443033212603	2.79975199535117	0.61003740739373	0.62000644461722	0.0233855003673278	0.983039099524468	0.23174828816036	0.27266950318465	0.234594668317033	0.305460449740767	0.18975858138754	0.18994133417582	0.00138876281459444	0.91373613157051
ENSMUSG00000038520.15	Tbc1d17	4.7463546111487	4.6370791242555	10.568275947391	10.72874288139	6.5198005794296	9.5320452919385	TRUE	8.02592293568405	3.88824671333018	2.0191370482613	0.51715031168631	0.62822553191585	0.280698910974669	0.433687370770167	0.70298990227195	0.74781376266786	0.0891750559996502	0.144396208422513	0.51981130636856	0.436961976111	-0.250480270424963	0.0275873318936311
ENSMUSG00000027312.14	Atrn	2.4363474530259	2.9447098438616	18.455046701509	32.939706854104	17.285507216608	8.1705009131119	TRUE	12.7280040648599	11.497812712574	5.18884463183188	0.64763361296036	0.75458545033505	0.220506417667062	0.524027706693973	0.5690536769054	0.64194402129089	0.17388275366369	0.126044245635564	0.54734007424788	0.55786061915946	0.0274672220714618	0.862732441339273
ENSMUSG00000075054.5	Yae1d1	2.7653293550011	1.529490796699	1.1864318403648	1.5489212325181	2.1982146816252	1.3321852199279	TRUE	1.53920601460855	0.414976010463658	1.3596581426526	0.5546356969065	0.50517941600496	-0.1347446162563	0.732562328525745	0.29391682597144	0.31018275115977	0.0777105104183252	0.743508677175117	0.60354108473671	0.58017322780522	-0.0569682589687982	0.693918494437509
ENSMUSG00000022961.18	Son	11.91133928045	13.730589698955	25.026719498589	36.220004371227	33.022315615847	17.722383631557	TRUE	21.374551565073	12.6815481979443	2.33479372268708	0.54520306900902	0.75489285398281	0.469478206216838	0.197644503350043	0.28560728536461	0.34778581068448	0.284166292744785	0.239104846634361	0.29557609562542	0.30632276123118	0.0515229720800528	0.847346816341782
ENSMUSG00000038914.15	Dido1	22.792562298942	14.625708420435	11.062711177715	12.618179202882	20.449617304177	14.118006375869	TRUE	14.371857398152	3.7530717393636	1.24100956905379	0.49958828086811	0.63353784020277	0.342691156599914	0.251175956768876	0.40434336667957	0.42733188240677	0.0797760137300754	0.712501738317862	0.42752002972213	0.48618638316778	0.185517474524827	0.28122396754641
ENSMUSG00000042207.17	Kdm5b	23.285134223847	18.56604899659	18.26392236407	22.687465319971	29.878938682058	19.820006995009	TRUE	21.25373615749	3.49825787896561	0.853827434220182	0.63010481626334	0.78688696576934	0.320564574225157	0.479724671958428	0.43011663726312	0.47220706893766	0.134691701881009	0.315940880725613	0.2700585945165	0.20465851262502	-0.400053786363829	0.0535621138738864
ENSMUSG00000034636.9	Zyg11b	4.4964123382569	4.8769763399088	13.373751595503	15.641817629879	11.287353149474	6.0296326223578	TRUE	8.6584928859159	5.88858852553468	2.88243347363836	0.5971715750788	0.777293315811	0.380313614205645	0.215371521462525	0.45461280372392	0.4781889243206	0.0729423983142441	0.512964302242333	0.41819332548046	0.47422047036199	0.181387903861622	0.887781104778497
ENSMUSG00000012422.14	Tmem167	19.376653874109	14.80106932176	36.782770668097	38.39815972143	10.082722273717	7.4560866036318	TRUE	17.0888615979345	12.334427184319	3.20255459927958	0.59245631673185	0.41104888276476	-0.527398812139666	0.160851680152975	0.31369473989566	0.2827781863999	-0.149690503466775	0.15252308456437	0.51909767731555	0.55047405044371	0.08466852374361	0.703266250481908
ENSMUSG00000021952.16	Xpo4	4.2985738445823	5.064014500615	6.1399429004771	7.7667762230133	4.7292777824967	2.1662330367804	TRUE	4.89664614155585	1.36500688113481	1.70178463147417	0.62591676084658	0.70197154792595	0.1654417474895	0.584071958025541	0.4027501247468	0.39576501072222	-0.0252409653154374	0.868535187962032	0.49994923527677	0.62706346204282	0.326829847141573	0.554629208731663
ENSMUSG00000031563.8	Wwc2	3.1752967713057	4.5468353998931	27.47671679623	43.615782253057	6.0809366737255	3.08274918434	TRUE	5.3138860368093	3.23927797125331	5.0982624246193	0.65147381880777	0.57552001915216	-0.178841088860304	0.638377460801857	0.51711840807188	0.48441113399551	-0.0942626367509455	0.558035223576004	0.63348466155158	0.62767660793092	-0.0132882440933392	0.708183087903838
ENSMUSG00000021756.12	Il6st	6.4265575802024	9.0936707997863	55.337854472394	56.110711541958	39.071959571545	21.660276554654	TRUE	30.3661180630995	33.5156613422657	4.5626913069251	0.6700575194474	0.73354406400016	0.130598685698757	0.643120949319644	0.54930479979408	0.61208992216133	0.15613671679054	0.208671409424425	0.5930697893233	0.65512225606406	0.143562277743333	0.431846120954961
ENSMUSG00000044167.6	Foxo1	1.8410877346573	1.174125782057	1.5493806745684	2.9884448254505	1.7042699366617	1.1467389876585	TRUE	1.62682530561505	0.494418895462602	1.50294512025364	0.49529990114324	0.57204873167379	0.207835719484429	0.649601309029914	0.30473926117308	0.33354300076955	0.13029738535833	0.66865724645693	0.32917238174976	0.37240378376586	0.178024435597877	0.567766602136276
ENSMUSG00000038766.16	Gabpb2	3.933527150832	5.6816288027692	5.0965285506507	4.9083544076917	6.1436182142287	3.2511827041269	TRUE	5.0024414791712	1.29586775458105	1.04171734782377	0.55023010993642	0.69369543760444	0.334267306476722	0.315922315256929	0.4617504272759	0.42950429111573	-0.104440750996169	0.531183286006542	0.52025945091952	0.55625256816808	0.0965088238934577	0.891057929002858
ENSMUSG00000053646.13	Plxnb1	2.530462306017	3.3683305714733	4.1205099855784	5.11382780144	43.918706321497	25.38097675871	TRUE	4.6171688935092	2.47263944143318	5.08949229611175	0.66801647535145	0.67665701915017	0.0185410678723159	0.310815531310912	0.66986843835842	0.71678345270124	0.0976595532505933	0.614003678145443	0.5358948742446	0.47939951467186	-0.160721568498744	0.173959153404755
ENSMUSG00000039512.12	Uhrf1bp1	3.7748013662907	5.1119737976175	10.2626281443	10.355464266285	12.960269359022	11.519186328177	TRUE	10.3090462052925	2.86242859695396	2.05497450907911	0.65565318402523	0.70087668210243	0.0962277421901879	0.566652031193011	0.68681066353058	0.68315359671098	-0.00770245596967329	0.835147793347403	0.52815790447628	0.53021018675904	0.0055950688751319	0.754752458029483
ENSMUSG00000024077.15	Strn	1.9648897226205	2.1446345408414	7.6896443501354	12.61741998899	3.9354951424322	1.9877061276526	TRUE	3.0400648416368	1.57714083040327	3.81960307856346	0.60158251932292	0.72108961573807	0.261415920137751	0.496282608902166	0.4163741862009	0.42360959915921	0.0248546525649527	0.899912697510224	0.4663507503654	0.54608966101765	0.227722404157324	0.6056740057444
ENSMUSG00000024472.9	Dcp2	12.351882293018	20.623760576682	6.3508134507352	7.6156592588365	6.8796541501263	4.236902019036	TRUE	7.2476567044814	2.89670235232273	2.3494752220483	0.48781702407937	0.63370046546767	0.377460968328547	0.506370308007699	0.30264910961016	0.27123929641101	-0.158079899316638	0.454874204171882	0.5764489992852	0.59430749308034	0.0440165980801247	0.91604948287467
ENSMUSG00000037876.17	Jmjd1c	5.1058795942133	5.4108626394542	3.719073714267	7.0724020122122	10.275118020764	5.2311819195417	TRUE	5.32102227949795	1.34700974400721	1.37582933474196	0.51091188659111	0.70096501682983	0.456267944160058	0.0788260756540326	0.21458955790859	0.25513094122819	0.249657998492067	0.420928763086224	0.22243795228689	0.19854969297105	-0.163902831253757	0.554273800361845
ENSMUSG00000034158.9	Lrrc58	4.9954530297099	8.7508318380661	41.761051051178	56.924571159753	22.639509991615	14.075188668043	TRUE	18.357349329829	17.0264851439221	4.47129735412456	0.53941888995912	0.59719969204035	0.146807377187149	0.670444452398589	0.3955173307604	0.34251741867993	-0.207563554016447	0.182379436508828	0.70324574672435	0.71390556765696	0.0217043313561222	0.979834561750331
ENSMUSG00000020883.18	Fbxl20	3.2527756736482	4.9034386873202	15.864517660167	17.544683727254	13.149667476957	6.8178813566296	TRUE	9.9837744167933	8.12544784257133	3.51623828642869	0.61623273092221	0.53662150753182	-0.199570434225315	0.661653034582718	0.58664967941368	0.55447477816257	-0.081377411545964	0.115419414455411	0.66153295570655	0.61919277347491	-0.0954243952345989	0.39880957190319
ENSMUSG00000025078.9	Nhlrc2	5.0674681921691	4.8775197642538	10.673895694484	11.640265084958	15.033990812915	9.6586384292532	TRUE	10.1662670618686	4.70111835116687	2.05725415620616	0.54465798642226	0.63180114718011	0.214119971108923	0.410434611783477	0.63194639442187	0.67105910357615	0.0866376521551639	0.321674491994945	0.46408358996128	0.44049701922131	-0.0752524279066754	0.364658818851789
ENSMUSG00000054611.17	Kdm2a	5.6223171574512	5.6380608741849	20.289320391872	22.363761387208	24.504832830575	16.509438131742	TRUE	18.399379261807	7.46476920008748	3.0561905689943	0.54830148846352	0.69080807201855	0.333315550606268	0.440698309635675	0.3922878300555	0.42434914139943	0.113339179018447	0.398291223178055	0.42198861223092	0.43027423058376	0.0280523719437795	0.974574762027359
ENSMUSG00000053477.17	Tcf4	2.7054215134862	1.8021371591681	7.0342613958526	7.8977557262081	39.432989152085	16.68246518877	TRUE	7.46600856103035	7.72765104854496	5.02051587294646	0.59786451063793	0.47885856318383	-0.320218973757371	0.532770011804867	0.34454955601887	0.39243661714039	0.187748163189226	0.350473186523858	0.39933711493666	0.42931120535484	0.104416664485524	0.860924701374294
ENSMUSG00000034724.18	Cnot6l	2.6263950408102	1.6638670861253	3.1970628019602	4.3809267585325	1.7072624982359	1.1352728338028	TRUE	2.16682876952305	1.13655798414841	2.43419632677301	0.48785173371619	0.44007383488271	-0.148697158182004	0.745839634043232	0.18498217037455	0.20591661364032	0.154674010965901	0.601233483573267	0.28213589571488	0.17709977496243	-0.67182785058223	0.280537394312181
ENSMUSG00000028991.15	Mtor	6.0379374853797	9.1089672681094	12.427215883994	15.479589268565	33.474661889258	25.361566702312	TRUE	13.9534025762795	9.45891416583052	2.9563353150999	0.51437896612309	0.70466730290813	0.454110624002647	0.339313697196704	0.46538097722117	0.49817382632463	0.0982369847041754	0.497260442760083	0.47291360524319	0.50923253720307	0.106747955328294	0.0590435501921018
ENSMUSG00000051344.13	Plekhm3	1.4659508389179	1.5055872986326	3.1170328391159	4.0773856807549	2.1388543313695	1.7747245194495	TRUE	1.9567894254095	0.698334780745939	1.93727554819824	0.52257956745934	0.79068794148592	0.597457705495065	0.366412626277088	0.50418190227834	0.53810365701009	0.0939397782699384	0.46486762828178	0.42832574612291	0.49193523553322	0.199759995341989	0.208077005077414
ENSMUSG00000041638.18	Gcn1l1	10.08511740222	13.748402088888	28.128559824831	35.445807657969	50.049043746845	46.487939652535	TRUE	31.7871837414	24.2698191959315	3.0514324592258	0.613283439538	0.74547414922043	0.28160433061076	0.295238906295393	0.58893314064895	0.5978759678197	0.0217423619525287	0.988202135907345	0.36989063517699	0.39551972545886	0.0966508719040794	0.658437805066142
ENSMUSG00000062078.15	Qk	16.906532031444	14.845641775536	24.380276800359	33.459182743135	67.469869647499	32.795230294629	TRUE	28.587753547494	12.2704799725765	2.49310960536244	0.53623712576141	0.62826022731529	0.228491145512185	0.551796759316094	0.33946551527091	0.33338954900481	-0.0260561453442716	0.908491121546104	0.60415159452729	0.65668611062873	0.120293343604866	0.80081589971194
ENSMUSG00000014592.20	Camta1	4.6507439677193	3.4035067574156	1.3444978886704	1.0305099529054	3.6638618310639	2.4006168016662	TRUE	2.9020617795409	1.7193444904963	2.85855112439598	0.54096028414657	0.38291506510493	-0.498498257591103	0.528858637264906	0.23128682833761	0.2005423890583	-0.205775893256072	0.209047219946195	0.37281138484668	0.34403674035224	-0.115883276062974	0.467521320976879
ENSMUSG00000036202.16	Rif1	11.295531892791	14.809050423818	1.7881577958028	3.1287576942502	2.8339861617031	1.3653841505964	TRUE	2.98137192797665	2.08246137555245	4.32597576987432	0.52175197906868	0.70987212437262	0.444194994722493	0.155812348766189	0.276640494535	0.38725675143754	0.485278038070134	0.408518667686285	0.26849177918157	0.25886621283769	-0.0526712384337044	0.622702435242701
ENSMUSG00000053754.14	Chd8	4.8343017154333	5.886012135389	7.6881222878367	11.961499613174	15.667845729951	7.1215562802161	TRUE	7.4048392840264	3.03144606488297	1.96153858644035	0.61359769821312	0.79699753190301	0.377282185691878	0.2999472541731	0.31616809719462	0.39878150590943	0.33490670362077	0.2678017710627	0.35103229121886	0.36034270386637	0.0377658851364413	0.948732973365862
ENSMUSG00000033237.19	Arid2	2.1294526193195	2.7538392099446	4.9927155964681	6.5845298725949	9.7921225611439	4.6613673251874	TRUE	4.82704146082775	2.83969098822267	2.46611135316224	0.5964167152864	0.69235487807692	0.215191013495298	0.47236865039892	0.3518643011894	0.45053170102385	0.356609471626558	0.109552662645019	0.47704327128735	0.3966316443446	-0.266320350810087	0.320278516599534
ENSMUSG00000026491.13	Ahctf1	7.626010622192	9.1426852981857	14.621193416938	22.080136863193	8.6255214570617	4.2269949370759	TRUE	8.8841033776237	4.3849386465796	2.36232304054492	0.61094399032811	0.78431812005722	0.360398807530147	0.273031080183187	0.39017242685553	0.42603501367084	0.126860175607444	0.602115649115114	0.31638271853964	0.32507109275808	0.0390844697081891	0.8474578169586
ENSMUSG00000006307.16	Kmt2b	9.7422912178298	7.5749556125056	3.6892819669109	4.3799445769468	5.670524542103	5.256286469443	TRUE	5.463405505773	2.11832736589734	1.59471274103557	0.46243521447838	0.59116921206237	0.354319872896937	0.205476748357913	0.32228751612963	0.32215627735272	-0.00058759984083235	0.916256425649228	0.30841351910319	0.31634477399612	0.036631756556716	0.9032010991436
ENSMUSG00000075415.13	Fnbp1	4.4959630931756	3.6466727489851	4.7941450559598	6.6355563618049	34.694338077003	26.642441033303	TRUE	5.71485070888235	2.43670171119525	4.35713402117367	0.53454787227666	0.66534473890177	0.315782889669784	0.327070347501108	0.43377311822476	0.47263614728767	0.1237893219526	0.364293495028149	0.40693373602452	0.38905727460776	-0.0648113336113385	0.174340675721339
ENSMUSG00000031328.15	Flna	10.555562361202	14.605545970601	449.59119632671	707.81144044978	127.30303874682	143.75049186269	TRUE	135.526765304755	182.280052634464	7.75397089713687	0.64396079782389	0.81490670859596	0.339662042931551	0.271680066412621	0.57509414976318	0.6570403575421	0.192183826504137	0.219997944555302	0.40541927800151	0.42038589537662	0.0522995736660845	0.272195223255976
ENSMUSG00000035569.17	Ankrd11	9.9954442004938	10.497527216168	15.411896670454	19.566659528923	28.957511206341	21.421566292292	TRUE	17.4892780996885	8.09799016713072	2.01564602573115	0.59922884608638	0.60116731136523	0.00465948954990871	0.615608492008161	0.26241113231868	0.23093724647664	-0.184328049521321	0.315700937530561	0.45810994583731	0.49199168904813	0.102940060139609	0.361196857950462
ENSMUSG00000009470.17	Tnpo1	13.850319067195	17.400018155978	48.422035514593	64.443682459352	36.860583069615	20.750270626936	TRUE	28.8054268482755	19.5410508617151	3.1355506539467	0.62025134039023	0.75575376723004	0.285063317471089	0.393997769202339	0.50091595953273	0.55228620879483	0.14084752454698	0.295752161133875	0.50783847572384	0.59483235694014	0.2281134243837	0.513312407370054
ENSMUSG00000040054.16	Baz2a	12.451942986728	12.082163078311	5.5846943420267	7.7094564901394	9.4880755611412	5.9568806292551	TRUE	8.5987660256403	4.19276098340311	1.71661836595922	0.56888940283536	0.7095182601705	0.318691606949084	0.419928161159539	0.29417946142953	0.37761833785099	0.360232300124786	0.147364053647945	0.33934626840989	0.31013791215763	-0.129848252792533	0.292407717149432
ENSMUSG00000039087.17	Rreb1	3.0350813493924	2.3082159321725	3.158766262218	4.2173609853583	3.8831274609459	2.6311756049795	TRUE	3.0969238058052	0.928071910827892	1.03188810239828	0.50128328598298	0.60306897065555	0.266696875065646	0.224048623359482	0.24924984989832	0.26683153588798	0.0983365478779817	0.692905533250868	0.26210940224917	0.25727594752478	-0.0268525189482667	0.633461821423518
ENSMUSG00000042121.16	Ssh1	14.250191423151	9.6730351390112	9.4859438744775	12.783875486867	5.8420575933014	3.9503876162915	TRUE	9.57948950674435	5.14596960450018	2.08558924294366	0.51364865199826	0.5247428233091	0.0308286717542749	0.970258666765068	0.24928002559992	0.26699483066453	0.0990445232317649	0.594677754047632	0.42619208021914	0.46683387029365	0.131405452728235	0.314765888663074
ENSMUSG00000024241.7	Sos1	3.153858992314	3.206451899576	2.9176390666288	4.4114554397981	1.740113468635	1.0002816349509	TRUE	3.0357490294714	1.08699667885656	2.1729897765918	0.53550104815347	0.52195438693546	-0.0369656621647004	0.916242756531148	0.36082394818678	0.3565765269296	-0.0170833597054687	0.92071130049946	0.29230165978982	0.22200064554757	-0.39689414954644	0.270358555961837
ENSMUSG00000036155.13	Mgat5	2.1379975725895	3.868498329734	12.591662153666	18.146633376204	24.490099934821	16.348805997331	TRUE	14.4702340754985	10.1530413631288	4.24513793161259	0.6316165421304	0.63785963898661	0.0141900377818854	0.873196503406732	0.69451035963602	0.72295652513054	0.0579126792902752	0.397902768972732	0.68949741116552	0.71752136372919	0.0574766528215911	0.745380824470474
ENSMUSG00000058793.14	Cds2	25.426451042732	67.634713770605	48.808916385199	60.935058896367	57.264582508643	41.89517196443	TRUE	53.036749446921	14.1142681826449	1.51273877019739	0.52279143479932	0.70176832832035	0.4247593337808	0.434080728913506	0.80177687145807	0.79249066504882	-0.0168068597562137	0.354205315713335	0.75915146402311	0.81310529734546	0.0990544364710715	0.232375946021437
ENSMUSG00000028465.16	Tln1	7.1600289651481	8.3917165570205	112.89733080227	190.51029487479	42.912295044251	49.268556127184	TRUE	46.0904255857175	56.8051560178012	6.01855362983005	0.53850498744344	0.6880957399951	0.353649605465533	0.625998255934775	0.50374327582134	0.57769487326408	0.197619015516224	0.30814457195365	0.43526480380013	0.42672174766704	-0.0285977275751136	0.323674177555952
ENSMUSG00000004317.14	Clcn5	1.1377171031889	2.0653954805158	38.428202620433	43.862502075357	8.109174915509	5.6483229700172	TRUE	6.8787489427631	7.82396582424028	6.93714342848187	0.7162341759204	0.74789741998453	0.062409046586486	0.656180248374219	0.6473469522152	0.65718155170496	0.0217528350993206	0.816331978440886	0.64135813268003	0.61206807721995	-0.067438053457512	0.433418680393615
ENSMUSG00000036550.16	Cnot1	23.90463062667	17.872507581397	19.779008011199	26.336776170597	28.982791827653	12.688684246193	TRUE	21.8418193189345	6.27456230517396	1.40314534602478	0.67547197263448	0.71908209927187	0.0902605868761557	0.424642100647077	0.315306552822	0.3877308154803	0.298300246993129	0.296275411078376	0.28499658131425	0.30608568215715	0.102990947667788	0.966985417348748
ENSMUSG00000027652.15	Ralgapb	2.1798240788408	2.7837697968929	11.821989783056	16.165875090465	10.761842614355	4.8397311945739	TRUE	7.80078690446445	6.70003247574271	4.24896126173439	0.6866894840978	0.73934716447016	0.106594078265701	0.620179331303495	0.45486617154052	0.49790070609531	0.130415916164632	0.518550012368636	0.49242182142019	0.5364731832946	0.123611361203355	0.901409208170748
ENSMUSG00000042810.14	Krba1	3.904949663508	4.8454214384786	3.6459329725885	4.0019075053597	9.402063874246	8.690555207432	TRUE	4.42366447191915	0.961055647928996	1.9385719706531	0.64377354413724	0.59105709285155	-0.123255796997155	0.98790607289032	0.60415550843334	0.63369597117748	0.0688708991970902	0.491276964660862	0.5566098797493	0.55136645785658	-0.0136550122568187	0.829869823073887
ENSMUSG00000038170.15	Pde4dip	2.4870132540111	2.2778949952256	25.519147472627	47.847925423032	13.796745439689	7.3003404070685	TRUE	10.5485429233788	12.1070432530422	6.00963429833852	0.6501522366219	0.69418853835188	0.0945499727765265	0.721399118743762	0.54847410345085	0.56920981024026	0.0535370222131217	0.69462370957714	0.49979615269629	0.51727882127265	0.0496023291320157	0.949062066671322
ENSMUSG00000026600.12	Soat1	1.7828991026627	2.8671015632646	59.4911436583	65.608633325284	25.656832943335	13.871627012663	TRUE	19.764229977999	25.8554018717294	7.25295678409727	0.7270080867572	0.63017768662112	-0.206212739614334	0.586581952245945	0.531745358248	0.60229725250384	0.179740143243952	0.0244559639630328	0.58106030402279	0.59649134392831	0.0378133039664023	0.982823038144301
ENSMUSG00000031012.17	Cask	1.8280909995924	2.4935235710861	13.883565521831	15.377190337655	29.111466787752	14.804514416218	TRUE	14.3440399690245	9.55066217405752	4.65127471537344	0.66096356806187	0.71711685387129	0.117637471206355	0.647838955677541	0.51151758722803	0.48775637097559	-0.0686231270641825	0.66246596133076	0.61277565409589	0.64823553331443	0.0811591254265163	0.915474653640513
ENSMUSG00000025958.14	Creb1	4.8109205700441	4.2410865289175	6.0849364574597	7.4197458688292	5.1882088250329	4.1306101095202	TRUE	4.9995646975385	1.20641590249671	1.02221654011459	0.52890484655768	0.56925548511745	0.106068092252394	0.466656902080294	0.31844375841142	0.32942354175727	0.0489050637697794	0.719316467726549	0.35986316232655	0.34132121921877	-0.0763183206910516	0.642529061235435
ENSMUSG00000044791.16	Setd2	4.1463497035517	3.56848575945	4.5067972343494	7.4128189009487	5.1969076182725	2.7058751061951	TRUE	4.32657346895055	1.20714912394512	1.46706621824106	0.53925051330336	0.71343512754731	0.403826607153123	0.115119760649497	0.18679139034363	0.22363162396809	0.259696256175181	0.410310516723453	0.17614950943028	0.20500439404138	0.218854375639802	0.738985377094538
ENSMUSG00000000276.11	Dgke	5.4904385568843	6.4523471800558	4.1136259124468	4.8629295094553	2.4677509355668	1.1464726752801	TRUE	4.48827771095105	2.19886653253767	2.6947911096933	0.55159567327892	0.72681230311463	0.397971700613483	0.42706475912805	0.58393761269038	0.55248974775539	-0.079866547781624	0.407335246420216	0.42479974403252	0.44654092655763	0.0720095110701148	0.920587428616305
ENSMUSG00000022788.16	Fgd4	1.912374157373	1.3426320650732	1.1606987946144	1.7277624203973	1.5138522768477	1.5649752507541	TRUE	1.5394137638009	0.285497132401755	0.784730940103416	0.43473942847394	0.69221511115909	0.671069490043639	0.532710192812495	0.27926034377454	0.29637939028073	0.0858344095947534	0.691045771636665	0.33538691011336	0.32058047005088	-0.0651398444046209	0.730072988217716
ENSMUSG00000026867.18	Gapvd1	4.1707916830589	4.4384342134358	17.787522087003	23.174405281109	22.364585211216	12.586634293074	TRUE	15.1870781900385	11.2416915274094	3.67798133453212	0.6397266197485	0.75189989208019	0.233085077646312	0.495394086338659	0.43168120866646	0.46896804374788	0.119523325668424	0.41552545808101	0.39428387257459	0.41998229798336	0.0910938194122114	0.884933844018003
ENSMUSG00000062519.13	Zfp398	1.8807601124869	1.0440109699783	1.7879407830173	2.3593383539683	3.4901763340834	1.7328104820974	TRUE	1.8343504477521	0.464445111417898	1.56613029138233	0.55618688474788	0.54022738846869	-0.042002941879802	0.791435599201818	0.21780384089089	0.26943920617875	0.306930397380646	0.354888548915019	0.30693912484224	0.439368934371	0.517480312826153	0.397180325211298
ENSMUSG00000029313.18	Aff1	11.063231942363	9.1804832237995	17.054297579535	28.265920787491	7.5618976708549	4.2795274363685	TRUE	10.1218575830813	6.22861762069156	2.88764166159698	0.53680270350772	0.66394563475794	0.306673178130286	0.200641532950726	0.35075475665245	0.35328059132061	0.0103518233702218	0.932745917543967	0.29829814170866	0.30000417059715	0.00822756669042276	0.81005977001906
ENSMUSG00000094483.2	Purb	7.7657362645846	11.391305053315	16.685939326915	26.206782507986	16.423688707069	8.1441997336895	TRUE	13.907496880192	6.33199156045806	2.2994317809229	0.4686050090575	0.60580731956763	0.370486633687582	0.283288312885143	0.42058890573402	0.40623106405868	-0.0501102300462247	0.812306974934398	0.68753293328803	0.79468230381618	0.208949397254617	0.38775451009985
ENSMUSG00000026193.15	Fn1	50.304953027762	51.320023913039	603.35575452738	1553.7072944481	5.6874512947279	3.5629629621688	TRUE	50.8124884704005	68.4772633175782	10.7620289056682	0.64277891051683	0.84413464332396	0.393150538549194	0.221007440056264	0.54711010920202	0.68751695204794	0.329564073075677	0.0437718391730851	0.3948861320925	0.35621670600263	-0.14868152488891	0.576945889359779
ENSMUSG00000031816.15	Mthfsd	3.5752470636593	3.8281448923034	10.576987575844	8.7672706538261	8.8902906872449	8.5262425166377	TRUE	8.6467565852319	1.61141206316299	1.95510258063774	0.55826233882127	0.47799525476699	-0.223946937004672	0.61036546155799	0.61523140023069	0.60399144016789	-0.0266010339018611	0.533297759523521	0.6218520724376	0.54207630555426	-0.198075482315935	0.00251587782653802
ENSMUSG00000063632.6	Sox11	2.677792010461	1.9034053929452	9.139107746494	17.556109249569	19.319847316148	11.952154909756	TRUE	10.545631328125	11.0292965693508	4.46624657768734	0.63130214839927	0.50374142271974	-0.325647291912544	0.630789672747193	0.43568598681196	0.47207488981342	0.11572703456323	0.481624596471574	0.51760894800988	0.63895333793776	0.303848018875924	0.289744315400997
ENSMUSG00000022812.14	Gsk3b	6.3801747787263	5.882971848031	11.52431289828	18.347231094281	16.603551881353	6.8342792195151	TRUE	9.17929605889755	4.51855374250632	2.61634572644241	0.51372511458458	0.61344655098544	0.255941043981152	0.605912762487488	0.40618065179874	0.40997252700951	0.0134057161482404	0.986848899156937	0.56085480888925	0.59627172169214	0.0883425763317308	0.915261039962502
ENSMUSG00000028906.16	Epb41	2.4933003892982	2.2218348372067	6.5126091308718	6.1189152617762	13.450320513099	8.7943020467392	TRUE	6.315762196324	4.67093252866101	3.12352163273893	0.60719131087361	0.62848975076434	0.0497380723536947	0.989068687798145	0.34645686121828	0.39128105669038	0.175529538325989	0.31595566404404	0.44699417712713	0.47142893081119	0.0767842591745773	0.831216718999283
ENSMUSG00000040785.19	Ttc3	12.936456992305	9.8702841172392	18.493155244509	24.302317436176	47.556084595782	32.176574979682	TRUE	21.3977363403425	14.2626994640426	2.75674139447148	0.57259487581956	0.59700456341319	0.060227199632065	0.649943369719826	0.16280644078764	0.17121491569269	0.0726506149553112	0.687347984084107	0.19302467890039	0.19020939598762	-0.0211967986533696	0.732993496054275
ENSMUSG00000021311.9	Mtr	3.1633462195516	2.9774368799177	5.0718835031054	5.0621748851132	9.3441125105985	6.351422902283	TRUE	5.0670291941093	2.36332124490879	1.84264815138813	0.62228428730321	0.80096408690156	0.364163738884811	0.509083305755961	0.43546958645935	0.53599032751169	0.299635002646006	0.143200967732101	0.31679342382425	0.37559333119865	0.245629060169422	0.247826689327188
ENSMUSG00000013663.7	Pten	7.7687626058826	6.6334944483964	19.93917420494	25.004935661142	9.3110302979186	5.6339611136877	TRUE	8.5398964519006	3.56738567141488	2.7719039346648	0.53531677965251	0.55933756736636	0.0633263557570337	0.576781784040742	0.20386898877808	0.21032645045852	0.0449879547872586	0.903291041055572	0.60203226304414	0.63000548375178	0.0655235828984694	0.928606449279524
ENSMUSG00000040717.6	Il17rd	6.6526669234364	10.653766292612	4.0633846405455	3.620557870491	3.4396348605218	3.5374063947537	TRUE	3.84197125551825	0.52402590089563	1.87756032498947	0.6639572453263	0.73831966315905	0.153155237262478	0.615652117009679	0.6128099008828	0.64680213572748	0.0778848361692596	0.406191540999462	0.57933603627723	0.56579495049817	-0.0341211060619688	0.579869524153428
ENSMUSG00000047003.15	Zfp41	4.8783572182302	6.2641920606157	3.9453144271731	2.9942996426563	27.11810650347	24.3999092048	TRUE	5.57127463942295	3.11563587044393	4.27558312840849	0.52944927418867	0.61677067248261	0.220241698367864	0.406881482867274	0.51834083717468	0.46540112058258	-0.155426375634463	0.0659733319289427	0.68950433908172	0.70721759455312	0.0365945366339944	0.545583838698457
ENSMUSG00000031386.14	Hcfc1	11.920462137659	10.44312135089	20.100208927049	26.553959693494	36.489204068511	25.411578378785	TRUE	22.755893652917	10.8478117381405	2.28647006934817	0.61991421988317	0.74238327248302	0.260095606182067	0.306533843858789	0.48324936997824	0.50772898920646	0.071290782717755	0.692584000829126	0.40164836410199	0.39761027348908	-0.0145779666237671	0.584836158579476
ENSMUSG00000029729.12	Zkscan1	2.9748903802274	3.1355083126311	7.6234419223841	9.5481519597305	12.463658722022	6.7024813226628	TRUE	7.16296162252345	4.75369273559479	2.67491639695049	0.4920831384536	0.59493737002852	0.273835719251305	0.360593222923482	0.38106244485378	0.40500216138242	0.0879021751755022	0.561142221157422	0.39141864938789	0.43224249797491	0.143128428873139	0.830110054560002
ENSMUSG00000027630.13	Tbl1xr1	7.5069143047925	10.221926151901	10.046034019007	11.931926455655	13.158054443977	6.4955924296959	TRUE	10.133980085454	3.28026150743437	1.18666052131253	0.56936942022663	0.62177521385119	0.127028096230782	0.714333264114693	0.37594087720045	0.3646536302451	-0.0439790358945052	0.777873714756751	0.6650371225851	0.72155771734792	0.117679925840115	0.614319484810382
ENSMUSG00000024483.19	Ankhd1	5.5058919205901	5.5987728022847	3.5473302900813	5.6245840270251	6.6775278806153	3.8593738293257	TRUE	5.5523323614374	0.887667598066738	1.02592325049965	0.57004362256755	0.64343092873721	0.174712960106253	0.0712718536580922	0.34367654209861	0.34050176803171	-0.0133890934831223	0.975165118684139	0.23478938644499	0.23088092114313	-0.0242182326440795	0.767281352831154
ENSMUSG00000005442.13	Cic	12.554049891224	12.254196757954	17.265894508511	18.456467879326	13.465228235286	10.494992812698	TRUE	13.009639063255	2.42411664645754	0.977448634750726	0.49003395017294	0.61390724205892	0.325138984501992	0.253034691411257	0.3585678918387	0.3464543438004	-0.0495810623820791	0.874444256071285	0.45944660977757	0.44640835503511	-0.0415331930754421	0.393333280813513
ENSMUSG00000014444.17	Piezo1	7.3244430771873	13.237899895802	140.80894811669	215.30407078064	17.215301719754	17.870380618269	TRUE	17.5428411690115	10.7661514712995	5.78250026899564	0.68192610899896	0.73681685295153	0.111690637462218	0.418828635215527	0.75447565550375	0.76571325612245	0.0213298832537408	0.995152533297438	0.56915575932181	0.48886249220823	-0.219394805672441	0.0908953005825028
ENSMUSG00000037339.17	Fam53a	13.323877397967	15.691539499131	18.037325796647	15.521864184334	25.935249536386	27.694626083058	TRUE	16.864432647889	3.6198596088005	1.38435566281952	0.53745101402616	0.4813120159807	-0.159160825538964	0.296542965075949	0.44237119911909	0.40548248702275	-0.125617855859915	0.163881860353689	0.58780689001308	0.50513769837007	-0.21866555576636	0.0336942763511529
ENSMUSG00000037426.17	Depdc5	4.2877919509998	3.7736646519006	4.189118969337	4.1605223211754	13.077565174153	8.2165295739489	TRUE	4.2384554601684	0.40232126210443	1.94664035873807	0.66449902251775	0.60560253085213	-0.133895842837421	0.744457878733594	0.49021895244874	0.46694333052384	-0.0701787903147894	0.474075551732218	0.50883162331406	0.51233106244051	0.00988802921896423	0.709118145851627
ENSMUSG00000042700.16	Sipa1l1	6.6667873993074	4.7553227603743	12.128133791488	17.288816189652	10.946259367447	8.9655929312416	TRUE	9.9559261493443	4.04849608052348	2.08878856777354	0.53697568709499	0.56507130004031	0.0735761485019478	0.511069637323779	0.16862927219979	0.19457017729858	0.206435604176634	0.342632980358339	0.2243227632596	0.22234258239213	-0.0127917505182626	0.925283140167726
ENSMUSG00000039361.11	Picalm	8.6150181150098	8.8850518201894	91.986453885148	176.46201232476	21.762177741947	12.350201702016	TRUE	17.0561897219815	12.3147050388466	5.92337078674203	0.59494081574291	0.73607567676985	0.307107941650588	0.628039062358383	0.38074005104347	0.40239954666121	0.0798223410665328	0.526183363177974	0.47177788550769	0.56574562733091	0.262045734765335	0.532408665754794
ENSMUSG00000056268.15	Dennd1b	15.857814069664	11.88662977362	3.5893831146012	5.2470206106388	3.9205522051442	6.5499372956865	TRUE	5.89847895316265	3.17796984343168	2.81665879785088	0.48807807140229	0.4583334131906	-0.0907144709464072	0.908885170324604	0.30315718873813	0.25668807255134	-0.240049773149806	0.246652477382331	0.22195260527953	0.18175762519939	-0.288235752937451	0.220743113956848
ENSMUSG00000026234.12	Ncl	35.66935192683	22.86467185331	19.160979448788	30.356371272055	36.180981285025	19.909144435756	TRUE	26.6105215626825	10.4900764332206	1.50218381281486	0.3803047911321	0.66543228779218	0.807135755335002	0.0427058799187008	0.28295426164725	0.31539236654523	0.15657887655484	0.590302636002306	0.3130191403382	0.4700968873604	0.586707251034647	0.129420729520665
ENSMUSG00000037533.19	Rapgef6	2.5116054033839	3.0930317674389	4.1880269276778	6.2823422883294	2.5225202400402	1.4262060555226	TRUE	2.80777600373955	1.24273127595907	2.19792591474471	0.56532420140821	0.68507353555926	0.277180394996139	0.178611217634309	0.35717817169841	0.39503447751238	0.145334657761954	0.58587526189477	0.32325246768894	0.34780943570041	0.105635688438394	0.937752999456038
ENSMUSG00000007880.16	Arid1a	7.4271499079223	5.0112717839823	5.4114774275003	9.0616222357792	10.858434095469	7.3717762041481	TRUE	7.3994630560352	2.70585234637715	1.29626190410588	0.51719372310058	0.60760796309085	0.232436011356859	0.214436717104255	0.29780634772227	0.39597307510422	0.411027829820911	0.22955801337092	0.23547469347851	0.21600182718374	-0.124528505028756	0.329212337527811
ENSMUSG00000052707.8	Tnrc6a	4.9108887173887	4.4234377784469	7.1193972858118	10.916316774181	12.342557125071	6.4263693113358	TRUE	6.7728832985738	3.12194054710259	1.92735308301427	0.56507637192183	0.6552265840204	0.213548025894359	0.132209649291026	0.25791238819236	0.30251947933993	0.230146969911454	0.486686359444428	0.23162055026384	0.17947770706505	-0.367958602491416	0.179374720743571
ENSMUSG00000013033.16	Adgrl1	6.6977175311134	13.731139146532	25.262136735631	28.138811174106	43.379633971429	50.4144857204	TRUE	26.7004739548685	21.9784292136961	3.27667873203084	0.66742669265851	0.61065046564168	-0.128262563641478	0.884256591990705	0.64135925773336	0.66474341028619	0.0516648608056642	0.716409390255147	0.73159609260392	0.73479506544642	0.00629456820132641	0.600414368760934
ENSMUSG00000021557.15	Agtpbp1	5.5937382049668	4.690534972267	5.7933679021202	7.6911350093854	5.595574513467	3.2728281651214	TRUE	5.5946563592169	0.817530050900177	1.06590925575705	0.39918079826918	0.60754497120085	0.605948878059776	0.201705353178851	0.17390064893699	0.19264347211121	0.147669983577814	0.510386511293494	0.28587824126503	0.33143304455412	0.21331663149145	0.674717459939016
ENSMUSG00000062901.3	Klhl24	3.5396958506214	3.3617570565145	7.6118792330468	10.921116232396	9.7059111533033	3.6028627112928	TRUE	5.6073709721698	3.1974411632791	2.93491006192484	0.57964435147915	0.69553750660387	0.262960326755536	0.379071304425236	0.50047697027762	0.48090283092564	-0.0575582652484197	0.747054049888227	0.49312711711835	0.47300296506336	-0.0601103617289958	0.473204700833543
ENSMUSG00000005886.14	Ncoa2	4.5953908580996	4.9176332411501	4.8196212294369	7.3748203408723	5.9347058914663	3.0981676193044	TRUE	4.8686272352935	0.992834234234734	1.14315637763363	0.52582140463303	0.61780924978531	0.232588600033222	0.60290379480305	0.3515077679612	0.38762822167782	0.141117039766154	0.413036594989848	0.32953969346278	0.29341826792391	-0.167493555559804	0.300838162474569
ENSMUSG00000041702.7	Btbd7	3.4459932270064	4.4227331215116	19.09212322221	23.47091678283	8.1360602826421	4.5165452835463	TRUE	6.3263027830942	3.54628966405907	3.96962657762761	0.58940990357314	0.63191225724729	0.100452948557996	0.728723245892478	0.37413402479324	0.34145586553561	-0.131856057806631	0.603554872045241	0.62823494039113	0.5754689404334	-0.126566118816178	0.564666530595795
ENSMUSG00000028760.16	Eif4g3	1.7181432832751	1.1691215789021	8.2626363027482	13.671058956787	14.578251894299	8.9796987235866	TRUE	8.6211675131674	8.15947117888806	4.68053766495659	0.55188117426051	0.69412549980516	0.330838856393037	0.221801369923016	0.2481714327639	0.29270282753475	0.238099627267147	0.499705740332603	0.230190294161	0.23196355778686	0.0110711668119326	0.940601037514467
ENSMUSG00000029502.14	Golga3	2.2860168339481	2.9290914022131	16.744458378261	23.674820564599	10.899445966588	5.5417878714903	TRUE	8.22061691903915	8.32192690870115	4.7573710078032	0.62341766492224	0.77886342527673	0.321171336804485	0.354599891738768	0.57220342455146	0.55390080932644	-0.0469004855181163	0.841413200231079	0.47711606589067	0.47696742821344	-0.000449517978015555	0.773465491358863
ENSMUSG00000021733.10	Slc4a7	4.9092616831168	4.7518846575827	11.346409202837	22.285254762876	5.5416026104506	3.425080563723	TRUE	5.2254321467837	1.6856413822676	2.8643204377091	0.61693851763817	0.74338969462588	0.268991967119242	0.135408909708674	0.44934094859011	0.54515549458169	0.278857247044283	0.0839396240637706	0.29568290256448	0.36217364044878	0.292630724439268	0.310372402036116
ENSMUSG00000022272.17	Myo10	13.351454954028	15.040782287649	27.934812045989	50.440658988973	81.143710628914	49.824987704371	TRUE	38.87989987518	26.2419285986915	3.59327163323789	0.64419538488529	0.76209022985262	0.242463494768459	0.486131250606094	0.45373602150937	0.45121983149739	-0.00802272109711693	0.937519602750105	0.45252132449509	0.43323573647059	-0.0628335270222434	0.178884218626496
ENSMUSG00000038970.7	Lmtk2	6.850515926041	12.83994746237	12.519768567684	16.751641908218	21.435583136477	14.936485676204	TRUE	13.888216569287	3.13708770733786	1.58316145111879	0.66570146845138	0.73066695678767	0.13433861464761	0.509261561042274	0.65451748735567	0.6631567296421	0.0189181368814505	0.977734442636345	0.66774730147468	0.63342530180655	-0.0761277444648019	0.570950525722331
ENSMUSG00000025558.17	Dock9	2.2540354327029	1.9587493345501	3.4575766033088	4.6228972004541	2.0926413587512	1.5273713307074	TRUE	2.17333839572705	0.63793025634954	1.75003025931992	0.632304300706	0.72817157310592	0.203659388661233	0.511368160152789	0.42190657499945	0.43758513092683	0.0526401456980242	0.777235590470574	0.33530478485218	0.3597397852229	0.101480651593801	0.979695251927807
ENSMUSG00000027823.9	Gmps	3.116737074152	2.5812704293815	11.278797908481	16.745302487763	12.157667504124	7.1294917249694	TRUE	9.2041448167252	6.70204172773824	3.68969420117881	0.66591953996512	0.79786892420448	0.260803883023137	0.544437621919051	0.51540905683472	0.58372006254592	0.179558766072362	0.345674912782241	0.43111646749993	0.6067554472959	0.493037484909251	0.220703906794299
ENSMUSG00000038495.14	Otud7b	2.0701707146515	2.4297537124199	17.145006199418	19.865233356869	13.856384738288	7.4953237490258	TRUE	10.6758542436569	10.9084166686117	4.82972390219939	0.63258991382332	0.73997097341068	0.226198126407571	0.550963778378927	0.61652953843971	0.61466339695152	-0.00437344148908777	0.921309705128798	0.61328964532352	0.67759555614094	0.143855820137793	0.220120392038863
ENSMUSG00000026313.16	Hdac4	4.697523802392	4.7632033828434	7.3078687086312	7.4694113507674	17.117334233185	14.32817803355	TRUE	7.3886400296993	3.94116064561718	2.41622831869611	0.57742795974014	0.58154852623942	0.0102586134824495	0.891783294394953	0.4364182480534	0.43945756714514	0.0100124426425339	0.979057519922265	0.51693767901217	0.51992587596043	0.00831559530327586	0.841386297824907
ENSMUSG00000039704.7	Lmbrd2	2.2269598126145	2.9372986745995	4.1893574128652	6.0751059194473	2.6988816605997	1.3552294603413	TRUE	2.8180901675996	1.45472534106584	2.21679151184301	0.58538246921734	0.49529122302692	-0.241102485741542	0.926898637774539	0.58529926228865	0.62126811318867	0.0860415490372983	0.441835387414212	0.64777414636121	0.70567712401761	0.123517353650844	0.992050686288897
ENSMUSG00000020003.16	Pex7	2.376726115802	5.8671422764208	4.8222819140895	4.8046749773772	10.506102335632	8.8410790978254	TRUE	5.34471209525515	2.60049752205155	2.2921722833457	0.46419975293432	0.59462024239294	0.357222822285779	0.688586737759328	0.80875301392923	0.80647090486925	-0.00407669744864081	0.780888014194447	0.81853113604957	0.80932659093848	-0.0163152994160128	0.842068453499861
ENSMUSG00000025016.11	Tm9sf3	9.2856945792057	25.412573718086	97.079360068744	132.72558331509	41.287199588418	18.723447066177	TRUE	33.349886653252	28.6813652503892	4.79086934636208	0.68342898321679	0.63421165281793	-0.107827046298161	0.94893685633283	0.55202382290736	0.55002687903215	-0.00522840586881779	0.998462645750894	0.73352448237371	0.82826057420741	0.175239598366742	0.266324806773014
ENSMUSG00000024542.9	Cep192	6.4284344823347	6.815257945407	4.6096988833929	5.8223379844364	4.2432096004423	2.4253547573364	TRUE	5.21601843391465	1.61990720494684	1.68213654221609	0.55851264250188	0.7129275217138	0.352165477600276	0.0447411751033502	0.3224379211092	0.34769024917912	0.108781182319302	0.784887014722731	0.26536077513366	0.22219049896678	-0.256158004119095	0.552741912509674
ENSMUSG00000024563.16	Smad2	7.5660286620212	7.4866819549636	19.564444790559	21.943900281925	11.301502158443	8.1149713952839	TRUE	9.70823677686345	3.23485746500692	2.35663404502858	0.51334945650728	0.59707321292963	0.217966587482608	0.936734289701325	0.42752864703132	0.44072220819725	0.0438485039025888	0.507734968774655	0.50474720050627	0.57318371247147	0.183436610792384	0.388860288542778
ENSMUSG00000044308.17	Ubr3	4.0004886312669	4.6660632597192	7.1790533482439	13.002769016433	9.162554035226	3.9650252759304	TRUE	5.92255830398155	2.87594948207769	2.44721035698881	0.59045356810639	0.74406940279941	0.333613580553435	0.213854714928724	0.4491295757099	0.49052906409248	0.127206890971985	0.53394079930405	0.31441970423398	0.35594202370303	0.17895064022569	0.844999584260636
ENSMUSG00000030213.12	Atf7ip	3.690758435273	3.1916240560063	5.1289127840724	8.0241264435211	7.4205870252018	4.085867998252	TRUE	4.6073903911622	1.72900685315173	1.84770861978175	0.61977943718389	0.56841862283201	-0.124801068814166	0.490523273099281	0.28031804417441	0.35344434031432	0.334418426118721	0.215573818679245	0.31329172852096	0.31193129778082	-0.00627836690980705	0.702457051153618
ENSMUSG00000031314.18	Taf1	3.1299250946791	5.2926888388216	4.7633536819883	7.143120061565	7.4106417262324	3.044475807188	TRUE	5.02802126040495	2.8774609321223	1.82010332076141	0.52037904505711	0.74043123611084	0.508802890672663	0.279191237196855	0.37353743381689	0.39934166508526	0.0963707735621019	0.743929743190441	0.40650436883122	0.46054353953196	0.180066696872631	0.822490150548414
ENSMUSG00000026159.13	Agfg1	12.250074024713	18.678795596727	24.994441737134	25.391359531184	10.027913132097	7.0961377973032	TRUE	15.46443481072	10.2335120964091	2.60999620366106	0.53419355354457	0.60301091266503	0.174821544603779	0.889754897003562	0.62572289581867	0.60945583991798	-0.0380022051136337	0.440941710317833	0.72085248311999	0.74283161602027	0.0433311665306235	0.860564383240356
ENSMUSG00000030660.9	Pik3c2a	2.4585377357599	2.2480607921317	17.802597109411	32.450378624919	4.436613946565	2.6377716289922	TRUE	3.5371927877786	1.75524053843451	5.16937871148371	0.50738202370848	0.69337324008353	0.450559752170944	0.0370185227457228	0.2201975474985	0.26810758153197	0.284013615711609	0.325583077598816	0.193812901053	0.15635633661721	-0.309826917962706	0.379028904194066
ENSMUSG00000034312.14	Iqsec1	3.816167809279	2.5395692430909	5.9485443027337	9.6293435250933	4.6415698376388	3.7627567873233	TRUE	4.2288688234589	1.59780663131412	1.98662114245185	0.5321269357403	0.50160659219717	-0.0852141247658667	0.861614732180487	0.24932640788137	0.28717486289811	0.203893775428193	0.184526563648906	0.48022320930314	0.52388267521197	0.125538621852557	0.480749250623662
ENSMUSG00000052812.5	Atad2b	7.5578058974455	6.0566495769646	2.5670530283734	3.6328376634514	3.2564318329649	2.6331160338971	TRUE	3.44463474820815	1.25213015183228	2.02219318911778	0.44027056431497	0.66008393329946	0.584259091191463	0.0790914201697437	0.17309668140575	0.19476239339437	0.170137069058517	0.595048973409934	0.13871870444544	0.12018470766878	-0.206908990914817	0.402000118075783
ENSMUSG00000072640.11	Lyrm9	5.283572511892	3.4002902401693	2.405029957549	2.3195819430071	4.4379367757203	3.728979354363	TRUE	3.56463479726615	1.50699382431038	1.528116498946	0.47624612860145	0.39645001021644	-0.264568402125899	0.657981067682552	0.15865859215083	0.18469150150425	0.219191830415514	0.170287601824057	0.51175569847974	0.39006243998302	-0.3917501773739	0.00194566752793802
ENSMUSG00000020790.14	Ankfy1	5.8286837102455	4.8648787641937	24.197000570423	31.635940432419	22.334860687645	13.45172178486	TRUE	17.8932912362525	13.6164332884496	3.80273112613684	0.63022881711119	0.750635311957	0.252236437316067	0.491632975506185	0.36833858943839	0.42115412644828	0.193315750781218	0.365484728270558	0.42894015075631	0.42737218852193	-0.00528333824982884	0.972908510690774
ENSMUSG00000026425.15	Srgap2	9.7280754240463	4.2203356485746	7.121802581351	9.9486148870083	39.617497884043	25.202645194829	TRUE	9.8383451555273	6.17840345774093	3.52556157175765	0.56261061187069	0.65539011661354	0.220217152185058	0.654380563624573	0.19967146048273	0.22556020034956	0.175884389830856	0.54547408087393	0.25692530888734	0.28437808784608	0.146461292919875	0.735168646515257
ENSMUSG00000018160.15	Med1	7.8902164488257	8.2207948797635	13.618455316714	15.979694445028	19.656666687269	10.946984174982	TRUE	12.282719745848	5.75167224773057	1.79580677947554	0.53825662369416	0.60676650033137	0.172847268315372	0.4789848879906	0.40080797413528	0.42063781480278	0.0696673408882471	0.686423961546222	0.59422536846592	0.64140872977647	0.110233791920102	0.323633731486868
ENSMUSG00000048264.16	Dip2c	1.0944479659261	1.162719558706	8.909385096938	8.969699322547	17.519001103135	12.503143696246	TRUE	8.9395422097425	8.4066564131584	5.15500130257618	0.63956182955619	0.71330134115921	0.157427847935986	0.72219868043908	0.4956556312779	0.47623214719652	-0.057673110991088	0.667118055762829	0.47465299246424	0.50204957599801	0.0809566546318124	0.970667963643808
ENSMUSG00000036712.15	Cyld	1.4265754600117	1.3924267476472	7.2521393703463	12.241637983452	2.6042536763574	1.3949165019543	TRUE	2.01541456818455	0.921796087860822	4.42412630501806	0.59141544985136	0.60747496365994	0.0386530188078511	0.955749189339454	0.4607909617337	0.47167922893782	0.0336936520898587	0.732800899471071	0.49981730376712	0.43583582416776	-0.197616062884908	0.407576465587971
ENSMUSG00000057738.13	Sptan1	11.296616009323	16.081139165146	59.958939867442	101.76872728556	254.96412964478	281.26546841316	TRUE	80.863833576501	99.5935897496865	6.50731436741903	0.69864139490298	0.86574648186467	0.309392493979205	0.384227219743377	0.43177419055045	0.48354689163078	0.163378792506532	0.390324705631675	0.39251362599575	0.38920783153124	-0.0122019976924602	0.898859529900292
ENSMUSG00000030022.14	Adamts9	2.4671254424218	3.4535433989949	4.5524742333462	10.240943268545	6.9194140511688	4.2641638034593	TRUE	4.40831901840275	2.14678196454172	2.18369513338022	0.5992627317345	0.82468237006762	0.460649910976089	0.356446350857233	0.5652415224112	0.62342346437659	0.141345006705692	0.249211132339101	0.49143675286248	0.48293882305652	-0.0251653106835499	0.783243020662944
ENSMUSG00000038146.8	Notch3	2.710548486074	4.9938915453295	3.588182032303	8.1655194049613	53.589820076168	44.312213835948	TRUE	6.5797054751454	5.0858224041777	5.98952765150868	0.58502618881128	0.79351538629087	0.439756988572473	0.225988739411163	0.69901400446081	0.73673899619658	0.0758322479744115	0.814863587147033	0.59668245526679	0.54319096903055	-0.135503862933512	0.205414578161802
ENSMUSG00000032560.14	Dnajc13	5.9207660352918	5.6595549746927	13.532219529715	22.725000500191	10.90909506784	4.5982850571502	TRUE	8.4149305515659	4.87183922014646	3.08064146562679	0.57503647732008	0.76280973534838	0.407669780121535	0.0652736604160662	0.35904367963646	0.40229571865091	0.164097017957204	0.534052316770733	0.27988951235828	0.23016872189218	-0.282165633253087	0.352964955835989
ENSMUSG00000043671.14	Dpy19l3	1.7884298955323	2.8168148838069	9.9192078214458	11.975736127122	15.426180436584	11.116713264277	TRUE	10.5179605428614	4.71911244782895	3.71598046735158	0.62817663171653	0.6711897871443	0.0955504883548607	0.677485244956715	0.64381867949725	0.71400615447976	0.14928207462864	0.0439885805323113	0.65158691733293	0.6363755052599	-0.034079331551868	0.739453859096824
ENSMUSG00000049804.9	Armcx4	1.0948458471606	2.0387983111819	2.2234195162824	3.7820170937482	7.2994974695526	4.645722628081	TRUE	3.0027183050153	1.9325129961173	3.25198944821546	0.50342687585501	0.77839706252557	0.628724027753524	0.282827203649371	0.51169832772401	0.49313919175987	-0.053298604311849	0.651288416243712	0.34456898840594	0.29472932217795	-0.225402264072722	0.396632180331862
ENSMUSG00000005610.17	Eif4g2	96.061652702603	125.2658423136	131.03532574176	194.46954996416	106.60724918479	49.101678676981	TRUE	115.936545749195	25.9259838239271	1.8481458246784	0.49709761798926	0.57305788366639	0.205151680538721	0.811897313382586	0.32275717761588	0.30022515124367	-0.104404335945559	0.303144137268164	0.71396370715806	0.72794856120031	0.0279857695676138	0.913200334274067
ENSMUSG00000037674.15	Rfx7	9.6159037043594	7.7098406508535	2.9437609782431	3.2746199206902	6.514503458085	3.9652583058708	TRUE	5.2398808819779	3.15896163524118	2.53648606045447	0.48766315119613	0.43545980650031	-0.163345401203811	0.556957224178913	0.23225149991388	0.25134058652389	0.113955742917575	0.531563599132354	0.41069244823861	0.36217014215758	-0.181390806188226	0.313657336500398
ENSMUSG00000026933.17	Camsap1	6.6970588458689	5.5794064518766	19.416297769103	24.687569442973	18.19860177565	15.204550044461	TRUE	16.7015759100555	7.93244032006366	2.7314118457551	0.63022592948598	0.65984902345838	0.0662668542496663	0.666269221530031	0.29717939639671	0.35359544932054	0.250765611206628	0.290722266564335	0.29000985751777	0.28309726729824	-0.034804115529612	0.675485423544093
ENSMUSG00000038241.16	Cep250	2.5744038114528	3.4998268484853	14.898567344918	16.039415126076	15.02302632053	12.545269469307	TRUE	13.7219184071125	2.68247161398404	3.45822317439765	0.62869093654318	0.77997328993643	0.311073755149469	0.309156694836136	0.64520716272782	0.66448765975676	0.0424799527943222	0.801646384349677	0.32581279150023	0.28261438481871	-0.205208346156955	0.173180819657069
ENSMUSG00000008763.16	Man1a2	2.9184511977197	5.315047314962	26.128183447222	34.904328425302	10.214211076169	6.0618201138397	TRUE	8.13801559500435	5.96192947370251	4.5958003143188	0.65171659547997	0.71923915064339	0.142226821226335	0.609367295154627	0.41395976266104	0.42732689267332	0.0458495690107987	0.744427929285371	0.6453331657971	0.6180514479136	-0.0623172361138933	0.437739789096809
ENSMUSG00000020841.5	Cpd	1.0984166570813	1.7248867374406	19.373823053639	41.123666410893	40.635859260557	16.606673973905	TRUE	17.990248513772	24.5794276401593	6.93632172816944	0.72262263689327	0.84099587611931	0.218856276768015	0.46712738164874	0.57218960715724	0.64221794201913	0.166569677225563	0.229059630611498	0.50836131943431	0.59988916695216	0.238841717267061	0.566048698960729
ENSMUSG00000021843.17	Ktn1	2.7646412076686	2.4584629626479	3.3488570431254	8.052755110948	6.6124560992498	2.9284683826904	TRUE	3.1386627129079	0.781494216701631	2.19266179003886	0.56226134824719	0.7581823957399	0.431304084382146	0.112307630948244	0.22261135069313	0.32253708065763	0.534937874428073	0.149554057120234	0.15774426222069	0.17703325657898	0.16643287354771	0.884650453175926
ENSMUSG00000038024.17	Dennd4c	2.6800365037762	2.3383413208251	4.3654785056312	6.6830311383864	4.989219405858	2.6299651009748	TRUE	3.5227575047037	1.53983472599344	2.17833608773837	0.52144587521144	0.6912270947354	0.406642257053649	0.188784918954794	0.29278732706951	0.33882756097421	0.210698121673836	0.34928571826233	0.26506381311304	0.27966830491078	0.0773770361243856	0.848016454050967
ENSMUSG00000008730.17	Hipk1	5.3042842745409	7.2402645141391	14.922388089269	20.038887621411	20.254648669928	9.7124560052592	TRUE	12.3174220472641	8.96253591022527	2.78733996497024	0.54860422183925	0.64572294278838	0.235149562879801	0.722121940470201	0.39363177305875	0.39194756539499	-0.0061860124067018	0.992708206899445	0.61664927566884	0.62731289076304	0.0247350311481596	0.765796093972839
ENSMUSG00000045095.16	Magi1	3.255756760916	2.9812379088795	6.2237930727054	8.5381033809681	33.55766015392	25.64206588535	TRUE	7.38094822683675	6.31950969238876	4.80089535600078	0.65306476929101	0.59400859779723	-0.136742268637367	0.516889861827223	0.48021255185398	0.52085735213397	0.117215200472369	0.526511938609794	0.39607919793144	0.38749191307111	-0.0316227311710722	0.601772808946889
ENSMUSG00000034656.17	Cacna1a	13.766517636003	14.888978172374	4.0652183331219	4.8381345518417	4.624658360286	5.6048156236233	TRUE	5.2214750877325	1.29955337224893	2.53608759052467	0.48286425541701	0.63105531436033	0.386148798070488	0.453774011159502	0.47494025722216	0.45737433590002	-0.0543706323206397	0.505089709727659	0.47954307783479	0.50705882512734	0.0804927076931924	0.671585310732883
ENSMUSG00000027253.15	Lrp4	1.5769283130656	4.1935955404921	1.7862322978869	3.3869492276467	16.239907415457	16.999602514321	TRUE	3.7902723840694	3.1263468757222	4.79870311362677	0.48590391597906	0.78159915657506	0.685757851075403	0.322016798938955	0.66762844782803	0.72295934609319	0.114869093283438	0.0314516212471123	0.42823297283812	0.48747699886182	0.186938264466028	0.0209860035981469
ENSMUSG00000023852.14	Chd1	3.0579091102651	3.108172502576	6.0695553182677	10.434154331802	5.9186013917153	3.1323108364976	TRUE	4.52545611410645	2.13852493517511	2.53293267135977	0.57961482598642	0.74224616595432	0.356803237932181	0.174319211197573	0.33342268442066	0.38872819903279	0.221409505672915	0.487580322887617	0.38337395798211	0.41038694071527	0.0982324821799268	0.910720759254311
ENSMUSG00000022604.18	Cep97	1.4265929111165	1.7935759184864	1.3833550421321	1.9649867878543	3.3593272763824	2.0405738756031	TRUE	1.87928135317035	0.455144088973916	1.33644523277152	0.57361060175216	0.61722260090269	0.105719201303986	0.662020775307091	0.45902656414845	0.47666070975622	0.0543850659750249	0.695937396415469	0.50723615598828	0.51541446489038	0.0230754413958397	0.424927559779976
ENSMUSG00000045328.11	Cenpe	2.0468195893	2.2288952280252	2.3864605466585	3.6493574434767	5.1414947458584	2.2340924413573	TRUE	2.3102764940079	0.255628535932941	1.48007798147248	0.55605472630956	0.79831075300369	0.521723565442308	0.139217881790868	0.32792728978682	0.31100104737173	-0.0764565273997345	0.704158962509682	0.23011155328425	0.22829048060939	-0.0114627167598539	0.66654697496706
ENSMUSG00000048410.17	Zfp407	1.5836518455034	1.4924798370395	4.5986325089371	6.4127419637481	4.2937650251672	1.7588937488033	TRUE	3.02632938698525	2.20649953287528	3.41635230683641	0.58678315757044	0.82372469367318	0.489334776627251	0.189684199410304	0.24700785591213	0.26303025463793	0.0906718263247369	0.652831778615375	0.28316806939758	0.33183615664353	0.228812496544874	0.750829450109929
ENSMUSG00000042323.17	Pbrm1	2.7012262236207	3.0086229879324	8.1396831991612	14.54672426909	5.0989776553262	2.7956084389443	TRUE	4.0538003216293	1.93536082148817	3.2799190591858	0.52273138348982	0.65124751631228	0.317136187626405	0.126476111376805	0.26698214494989	0.32323993247583	0.275862175469733	0.32224435098711	0.17778167371779	0.25912378935292	0.54353485657748	0.410104874558439
ENSMUSG00000024236.18	Svil	1.740790233	1.3935880591311	2.0477837631265	3.0499546666124	4.4653111007762	3.3021433013256	TRUE	2.54886921486945	1.15743102954977	2.20305831439391	0.56985897806375	0.66693913804038	0.226950170953196	0.176791540203129	0.20679165495184	0.26968567883901	0.383100944874086	0.26580668923921	0.27079425105502	0.280880059288	0.0527570949418548	0.859520475630248
ENSMUSG00000026987.16	Baz2b	4.1882546494831	3.1623261984768	2.1024263482507	3.5154674589152	4.3607596043253	2.710788845771	TRUE	3.338896828696	1.09524540029178	1.27046320846514	0.51050220593722	0.64914025389207	0.346613026872538	0.0277017365651328	0.17974215426466	0.20211753642174	0.169265701918825	0.470867087516901	0.22544064454926	0.22931389115543	0.0245761102289804	0.818924451081796
ENSMUSG00000035168.16	Tanc1	5.9951555625811	5.7594759884717	28.059009753351	36.986027693189	36.412676796597	25.26136614878	TRUE	26.6601879510655	14.8840649820287	3.76869254063583	0.6283308151847	0.74857180191442	0.252616368310801	0.358154567536984	0.4293881098797	0.43462346040146	0.0174838090949012	0.954362575182325	0.38477894602565	0.42219682072286	0.133885853540561	0.677865542734975
ENSMUSG00000048490.14	Nrip1	1.1227114011289	1.2470167888843	3.5522632895456	6.3459592843734	2.9866644371568	1.406675759555	TRUE	2.1966700983559	1.50010358056567	3.53183032865798	0.53775136296837	0.61570528044707	0.195300665266051	0.297429130556019	0.33971520571368	0.36063135276797	0.0861990330902426	0.666874402921513	0.36059672274425	0.40376371975505	0.163124997924241	0.927519393719684
ENSMUSG00000055485.6	Soga1	1.2138156785039	1.5969933826965	10.056932092444	17.929384730444	16.651112825838	20.368295072271	TRUE	13.354022459141	8.59139633983018	5.74274381725598	0.53174967287274	0.71606895041677	0.429351270906562	0.365568356769961	0.76204132546525	0.74524201072671	-0.0321602330557864	0.634074668016122	0.49949880407376	0.47695808608773	-0.0666187325629683	0.508486647629393
ENSMUSG00000026667.14	Uhmk1	4.7882010743192	6.5300138076123	35.778674049043	57.548826572784	15.365672251903	7.6162416580606	TRUE	11.4909569549818	8.6463000894802	4.88927484363901	0.57121817374086	0.59467119685867	0.05805031934741	0.77904256974414	0.37205328828828	0.32962477267744	-0.174684598687671	0.297066283943521	0.73432151246583	0.77795766011177	0.0832797741596258	0.533255376123073
ENSMUSG00000071856.10	Mcc	1.6476203402576	2.3704261544644	3.5982020114104	4.0156472704674	5.2724661318915	4.6494937161669	TRUE	3.8069246409389	1.68947278349006	1.9466190334051	0.44816055251648	0.71537179626341	0.674677573633561	0.37602004934867	0.61291617722646	0.62552401726405	0.0293754947599117	0.85969472040583	0.61457841646904	0.58302466629772	-0.0760401799656334	0.520943639145969
ENSMUSG00000066640.11	Fbxl18	5.5844993657117	7.196715176795	11.629626329107	11.189156128729	17.997284339428	19.662662706138	TRUE	11.409391228918	7.44084909563361	2.21393366348923	0.5264861473001	0.6758433558553	0.360293331316814	0.425845524867105	0.66049023479419	0.61353269762835	-0.10639699872846	0.196532239620099	0.53953290444311	0.45013185790502	-0.26136327339438	0.0481196830695754
ENSMUSG00000019471.10	Cdc37	16.964461102557	29.024196451454	62.509080759819	65.739218620169	52.704493435921	58.055609784048	TRUE	55.3800516099845	12.9639998134221	2.2184576698504	0.46064248752022	0.65501710553984	0.507885097865023	0.374221430879606	0.76125083004961	0.77384673221958	0.0236759589486266	0.631467511379935	0.63079515274336	0.60825955090886	-0.0524845054035289	0.30320782601316
ENSMUSG00000005506.16	Celf1	15.496737978064	21.660479413227	41.594992229053	48.516532056237	53.077701858496	28.264530172566	TRUE	34.9297612008095	19.9083918242633	2.4239147092238	0.56437150460411	0.69052721365509	0.291053124779289	0.683493705833871	0.56791545749958	0.59199318400301	0.0599043857655916	0.473205718398013	0.61620780788218	0.67518354975775	0.13186279182286	0.595264129117414
ENSMUSG00000021782.14	Dlg5	3.939677860483	4.987332114141	8.234015529085	14.181874360015	11.177592256096	8.111741023623	TRUE	8.172878276354	4.58883984323124	2.10283698763165	0.4688873132344	0.68446906842049	0.545744102341111	0.392423143561236	0.56881959805676	0.55912953349298	-0.0247886214612811	0.929588956513977	0.45843309798657	0.45178056541485	-0.0210889970921718	0.652757829933053
ENSMUSG00000021413.9	Prpf4b	4.5314791318406	3.236768967107	5.202069018501	9.888237604489	6.282967600343	3.5469379549427	TRUE	4.8667740751708	2.02821877613524	1.82653609271336	0.54856942913451	0.64611660099065	0.236120317966814	0.110735542291129	0.23000893805153	0.29726616258803	0.370065327746034	0.251999916433132	0.18727898789644	0.2080764776277	0.151924839395803	0.946582894107074
ENSMUSG00000006527.16	Sfmbt1	2.2845864921171	2.634872141789	2.2425733762913	2.7315603033657	4.0565450661072	2.3758402201742	TRUE	2.5053561809816	0.331341686278587	0.874879057068853	0.57100072928956	0.56439703758958	-0.0167821726891557	0.839168932885214	0.49789861113322	0.51476190740666	0.0480533064070842	0.741538278685784	0.39896459292625	0.41995546375779	0.0739756216313188	0.939811719280592
ENSMUSG00000039176.17	Polg	7.3887362837838	11.159685080062	20.577687184302	24.114596105917	44.554698205345	46.580512691099	TRUE	22.3461416451095	19.3804448460204	3.38424538621234	0.59273025165806	0.67877388756628	0.195555374075115	0.437883359740819	0.77186453930218	0.77458841018401	0.00508223554866966	0.960094065995196	0.68930329935603	0.64854606856248	-0.0879298628640485	0.164852253048569
ENSMUSG00000039959.13	Hip1	10.766211728756	10.692451215341	13.02270771449	20.707364772651	264.07930986514	238.43681776035	TRUE	16.8650362435705	9.09679589425852	6.76819799156996	0.59016426758333	0.6530678251365	0.146116259172595	0.670980599376066	0.39514981115447	0.45924338594655	0.216859225005196	0.294364044466344	0.3669856782173	0.32948521543869	-0.155510031829604	0.26546994980381
ENSMUSG00000030268.17	Bcat1	100.9400705103	138.93329592413	63.592801290048	36.924573211144	6.9651097463582	7.181902100043	TRUE	50.258687250596	64.0263498359964	6.17966629018879	0.4577016279902	0.66072809508853	0.529649268000895	0.462248649252996	0.62558771926592	0.67304233735649	0.105485067836369	0.168179686946642	0.56835330725407	0.54195570976604	-0.068613080587339	0.465055141256655
ENSMUSG00000022142.8	Nup155	12.820705906859	12.851274718526	10.742135284667	13.671682794098	25.02447245804	13.795697109047	TRUE	13.261478756312	0.722760978181964	0.98085932402451	0.59526518311689	0.78119486117873	0.392149944952784	0.463543382426786	0.41189819453767	0.49036918461571	0.251580518707036	0.0979908763098478	0.30675771378107	0.311532310198	0.022282175789533	0.885869167506337
ENSMUSG00000041570.14	Camsap2	1.6549917721775	2.1108981869765	10.12524132894	14.423849465954	7.6519381340424	3.9980855955737	TRUE	5.82501186480805	5.84450836404355	4.38214824304565	0.59731256532294	0.72400869164829	0.277520945565309	0.463781544500044	0.45941594364816	0.4401935972141	-0.0616627642904638	0.7931317136934	0.54463430879218	0.5898858636846	0.115147969489442	0.983471675639012
ENSMUSG00000034320.14	Slc26a2	2.149580444858	4.9182238053437	6.2685319234096	8.8810655566083	2.5760823607724	1.0759920715153	TRUE	3.74715308305805	3.0533787310503	3.82762562481632	0.59733690293244	0.64771068464699	0.116804690076163	0.645495600070995	0.57646290844589	0.57052946475319	-0.0149263872189116	0.769491654603116	0.64346543538844	0.69354358345275	0.10812389257385	0.685701444261798
ENSMUSG00000047248.20	C2cd3	2.8318489784147	2.398741083356	3.0709054823842	4.6760621917584	14.607113644367	7.7737370292975	TRUE	3.8734838370713	1.86539072405129	3.23686963238371	0.56454644778385	0.65845457371224	0.221991630552039	0.665562476846342	0.40399774152488	0.45826859885313	0.181846205922843	0.465371778237269	0.4889355999284	0.49269641337364	0.0110545161119381	0.948427252375283
ENSMUSG00000027326.13	Knl1	1.7072001984545	1.6875054238243	1.3456678145473	1.8348616949969	1.8068699174716	1.618844869621	TRUE	1.6973528111394	0.13938296797165	0.431565231240428	0.54745195490143	0.70478345992413	0.3644477095746	0.260262922628536	0.1726834824681	0.20483572783271	0.246337282162435	0.641019975179613	0.11433977970403	0.13426081798945	0.231710921453016	0.771764888904751
ENSMUSG00000026083.12	Eif5b	2.2185232389334	1.4674555886319	3.8715879808046	7.2048624150481	1.8301127248706	1.3959576660805	TRUE	2.024317981902	0.878605594249603	2.80377440324469	0.5394983498468	0.54382902412417	0.011534602993358	0.936519220577936	0.2242827440148	0.27393732433623	0.288527222759686	0.359055440603426	0.21962100897126	0.19503003402927	-0.17131975760871	0.85211881581805
ENSMUSG00000027663.12	Zmat3	11.552553939324	10.643892910683	20.34931688024	27.370180826075	34.148325114783	18.551336287154	TRUE	19.450326583697	11.7256068111485	2.12078036402565	0.51001956506309	0.42725785806599	-0.255445565954918	0.62666934952708	0.52933810285122	0.54261644064534	0.035743254376389	0.677698908203976	0.699384228272	0.70436412402662	0.0102361666708437	0.729863929622484
ENSMUSG00000039748.11	Exo1	8.1683244868622	8.2753425973439	4.4461133061457	4.3120630075548	10.433356449394	8.8474282464796	TRUE	8.22183354210305	2.10315528552912	1.58470461704706	0.56964597489176	0.67902694938749	0.25340324584705	0.741774038842811	0.58717217640404	0.5698609430092	-0.0431736896235651	0.451975006687453	0.52672374855017	0.58806008591859	0.158917063937745	0.0515682965325654
ENSMUSG00000020900.15	Myh10	1.8682438036439	1.7282037579234	43.330428916632	81.711937468808	36.017428008671	20.727884347351	TRUE	28.372656178011	30.7359178242581	7.55249688208433	0.71845268281528	0.87913891257641	0.291197999221424	0.250040230046004	0.36998484067725	0.41376129294823	0.161332527828779	0.374025996274428	0.25649449062727	0.28979329942031	0.176096399589359	0.544003856213541
ENSMUSG00000065954.11	Tacc1	4.9805167729553	7.5318237479639	17.379593724091	20.365123132317	32.193782292518	15.710894985935	TRUE	16.545244355013	9.51332483362095	2.96186858301112	0.62723581587827	0.75748728693267	0.2722137344042	0.480217026186508	0.50179973527911	0.49079170891531	-0.0320008323169697	0.6342342995287	0.65170798324702	0.67870300885846	0.0585547412753896	0.715324613658655
ENSMUSG00000024589.17	Nedd4l	3.0916354607956	2.465699980592	5.0625154804378	6.8506833608229	7.2132062761423	6.761028345436	TRUE	5.9117719129369	1.66076834976205	2.15839750804298	0.60540374418115	0.6900489642491	0.188801138077286	0.844028796446157	0.4245410202078	0.50435352490944	0.248531383260289	0.0370596545819157	0.35205077981771	0.39047770190621	0.149456627860608	0.13957664646565
ENSMUSG00000020121.15	Srgap1	1.8387273332004	1.5468778180129	2.1054630945474	3.4214477717183	1.4411361521975	1.4487917883077	TRUE	1.69280257560665	0.367445516297914	1.4112725472398	0.53341648495189	0.6569481014679	0.300516991650604	0.412508986469973	0.25746064342369	0.2674798527689	0.0550783159323255	0.764557885021534	0.24400093032813	0.21704704724193	-0.168878852546124	0.343496563745824
ENSMUSG00000057406.16	Nsd2	5.0630762791244	6.1689190456449	17.122800783616	15.741200409466	35.622837883907	20.95716765471	TRUE	16.432000596541	10.9625286939	3.25809922840153	0.57911421761208	0.53359890613347	-0.118092207286603	0.832684662348244	0.2633158027944	0.24325088204038	-0.114349070454673	0.580694136737489	0.24551260189979	0.19860456818276	-0.305898271185953	0.253591550579755
ENSMUSG00000024251.10	Thada	6.8767128159128	5.2009088367921	4.8240481687998	6.3599051273818	8.9061155761045	6.2648062527698	TRUE	6.3123556900758	1.24227348972217	0.907497899920164	0.55214983807943	0.65234964578973	0.240585598808416	0.259858528235416	0.34775497952329	0.36345142602675	0.0636913930874727	0.68136157612863	0.29099941810577	0.30320544843944	0.0592794099337977	0.825770707214456
ENSMUSG00000021275.16	Tecpr2	3.2469349596404	3.3720458431893	5.7782382244193	6.3709698259032	10.571563659438	7.9028230503185	TRUE	6.07460402516125	3.35866514364488	2.12980954533477	0.55665409306265	0.68567084619474	0.300735072154943	0.212153010216634	0.36396155645788	0.43560406368387	0.259231339399184	0.358743466735616	0.37286266846589	0.40231868180877	0.109694371879955	0.681614080190202
ENSMUSG00000040524.9	Zfp609	3.5126536776178	2.7483652550296	3.7716894557153	5.0581932338547	8.8915263063983	7.1038836188786	TRUE	4.414941344785	1.90429870300672	2.17184859689192	0.5465879003028	0.5327305250845	-0.0370475749100645	0.949583964363929	0.33485286623612	0.36014086909246	0.105034009957333	0.609006158642767	0.29345000813564	0.25612937068257	-0.196242050005399	0.0818708200470649
ENSMUSG00000055884.8	Fancm	8.380308856126	11.174900957603	2.4121998691639	3.4891271601631	2.6869868799665	1.7498845534453	TRUE	3.0880570200648	1.49300015546787	3.3606972522535	0.50153886061724	0.70709779379643	0.495548268820555	0.244716929060585	0.47997397668342	0.50020044946479	0.0595501662295731	0.932341637130492	0.39803501615909	0.44786874953066	0.170180650355391	0.555784185429735
ENSMUSG00000027272.5	Ubr1	2.6477261390719	3.1518455537501	3.7551103212331	6.3704025403635	7.8871705070695	3.9673553333936	TRUE	3.86123282731335	1.42544129388582	1.85019277662572	0.51838780293908	0.76503656432769	0.561496928251978	0.302752677389647	0.37453486447612	0.38377738761451	0.035169687948778	0.947734508900372	0.32887173340586	0.36666270036754	0.15692849837862	0.956566930144186
ENSMUSG00000020114.12	Cand1	11.547738026523	10.414264849283	48.677086562793	63.834961468871	56.759995486444	37.794067215826	TRUE	43.2355768893095	25.2959752948847	3.65852301528314	0.67369607481008	0.81669872726604	0.277706085724778	0.495871110980894	0.47383772818614	0.52914294767689	0.159264444002519	0.392025663174637	0.45093478200852	0.52553853310794	0.220877754332391	0.519693877678302
ENSMUSG00000035181.6	Heatr5a	4.9048449614973	5.327755324595	37.37614536863	43.723171341786	14.237000871152	7.4790280640861	TRUE	10.858014467619	8.51266565761178	4.77949880613634	0.63779328246814	0.8028561625814	0.332052639224058	0.301975732916246	0.4398436286001	0.50121134238169	0.188428349242348	0.330413473583829	0.47353350794509	0.51598167824516	0.123853321984501	0.958543945678077
ENSMUSG00000038774.9	Ascc3	3.0446260964986	2.1786105206849	6.0080793278369	9.9562006571747	2.344802630433	1.3789740939022	TRUE	2.6947143634658	1.35794604048098	3.25245041531149	0.52265167397235	0.65470452471343	0.324994180221697	0.0574218153585728	0.17015065240362	0.2077502669033	0.288037647475989	0.326300921651834	0.13676355218272	0.094677201330153	-0.530594834160658	0.299351597393628
ENSMUSG00000028106.13	Rprd2	5.7728139717856	3.4097269056884	4.1385858131775	5.9059094556887	5.655362055786	2.7869642491923	TRUE	4.89697393448175	1.39718412152406	1.58977797459734	0.53897909109632	0.62817178869019	0.220929845922583	0.467209807409608	0.17663476509955	0.22691871447283	0.36140627516354	0.359648416082133	0.25717196468515	0.29568883153066	0.201346374974073	0.874947518503923
ENSMUSG00000001280.13	Sp1	20.373291545146	13.513943777918	15.771606809653	16.796817903854	16.830647712606	8.4103649803591	TRUE	16.2842123567535	2.45867262678422	1.16721757379112	0.54363193712384	0.63466017239454	0.22335409665136	0.420706783639349	0.28192405975493	0.3646951648053	0.371384467710899	0.118477665616222	0.32705803812118	0.40047131932711	0.292152252362987	0.708921334683374
ENSMUSG00000060657.8	Marf1	4.7389383257573	5.8150755518386	9.484472410621	11.587326801061	10.002499000924	4.8832919782616	TRUE	7.6497739812298	3.79486816589964	2.10031643856721	0.56264312548491	0.67394850648943	0.260418228869068	0.483894883013774	0.32144458145278	0.28937903838194	-0.151609609819628	0.563430678169121	0.51734469199256	0.44965559043356	-0.202305421992775	0.492219891957169
ENSMUSG00000038126.17	Mphosph9	4.6018325619042	5.5686761714893	2.336895094322	2.5362811167998	4.0923250165629	2.9283307878667	TRUE	3.5103279022148	1.53119328625589	1.79877062380246	0.53261488138378	0.55587863189873	0.0616771872791422	0.875140297364784	0.37079277654679	0.35422935732971	-0.0659293562181568	0.699062822838395	0.52903442648117	0.49300231200031	-0.101767195259486	0.593212641900704
ENSMUSG00000052299.9	Ltn1	3.6949465130486	4.3472928703285	9.3734259466109	14.880936920529	7.9429091108054	3.3089068673104	TRUE	6.14510099056695	3.91877021775443	3.03710196136006	0.57842480374281	0.7250715830067	0.325994014261062	0.419229704471062	0.40688827456519	0.44169001481087	0.118401511669311	0.551113759765979	0.41478836408731	0.55076232472059	0.409054450991568	0.242680114300203
ENSMUSG00000041966.18	Dcaf17	4.3237886042897	4.0296633522815	1.4456415067768	2.0138828834096	3.2711865322962	3.4844442694245	TRUE	3.37781540086035	1.18446482209068	1.85235282787918	0.46983619191958	0.60453621629491	0.363670920641933	0.213475767670973	0.43962196355285	0.42943012786409	-0.0338400542342008	0.764465332789796	0.16625950977107	0.12020065147355	-0.467992147452692	0.205724671103862
ENSMUSG00000096188.1	Cmtm4	11.476187125482	18.342332763673	43.008022766463	41.764771372349	36.044200186243	20.58416214486	TRUE	28.3141811655515	17.3630537406115	2.70417802648633	0.64526675033082	0.48822352021304	-0.40235388863364	0.455912648541254	0.38336396925291	0.35981351234519	-0.0914653844041155	0.46859454399744	0.73776560856157	0.77151117946257	0.0645245236915446	0.529119173354403
ENSMUSG00000068036.15	Afdn	5.9066837576231	6.641493608777	10.544321365929	17.678605329426	15.434727927172	7.9756086763098	TRUE	9.2599650211194	4.42686025859923	2.21875325857621	0.6146491489164	0.73005382867279	0.248239708259742	0.513008520304204	0.35273659844887	0.38445719023751	0.124231689902455	0.633222807853894	0.2787133856579	0.33433257867832	0.262501651819214	0.516767804820937
ENSMUSG00000039852.17	Rere	8.7963697575492	5.8753536609301	8.0018284508929	10.894632162553	9.3422181396888	11.022085687202	TRUE	9.069293948619	2.14443539145363	0.997939531077028	0.4338661710982	0.43810982901903	0.0140424795473165	0.854966192624573	0.21343499973394	0.22053392685301	0.0472038433229772	0.892125515300206	0.13500604485946	0.12400471654524	-0.122629010143608	0.507057137010074
ENSMUSG00000043702.9	Pde12	4.5569100365936	3.540650019026	7.9944031466176	10.597934094848	5.822189080701	3.8865367978714	TRUE	5.1895495586473	2.18825258828444	2.06260351777334	0.58803641094737	0.63546829238923	0.111914652818811	0.759489650254554	0.56571111388526	0.61959260583292	0.131254412971643	0.0481279270228916	0.43248860968119	0.52119539511352	0.269162199968799	0.346303887741006
ENSMUSG00000021466.12	Ptch1	5.0416150741939	7.9840485528367	4.9978185679447	5.1681283548951	40.326719417598	17.782291072134	TRUE	6.5760884538659	2.30747658278424	3.78342434539652	0.62173517194258	0.60685859316565	-0.0349398085146977	0.920194649583882	0.4869407692601	0.52532918567174	0.109475442679288	0.258979073179915	0.5409842669647	0.58562580472261	0.11439248735935	0.498670535393955
ENSMUSG00000058881.13	Zfp516	10.199286284151	10.860338193017	23.451302511125	22.580141556653	14.860805744747	13.266467766257	TRUE	14.063636755502	5.23924822878263	1.67804929366503	0.58262374965204	0.61716499340396	0.0830917205832326	0.778413045182978	0.37789702284715	0.38649097333837	0.0324415669998962	0.881404805338213	0.32952543446117	0.33661431936785	0.0307067252153113	0.865386447398605
ENSMUSG00000030583.16	Sipa1l3	4.4272506889073	3.6126980149921	6.4244613218825	7.5716213962998	5.6147124118769	7.2936392000048	TRUE	6.0195868668797	2.09497819120476	1.37389862953714	0.45491461998652	0.55000278994926	0.273843136365088	0.378001441453656	0.44514742613185	0.41042498197881	-0.117164665722236	0.468910095787958	0.23936435866755	0.20509421830447	-0.222921528917136	0.299309011432166
ENSMUSG00000033623.13	Pcgf3	11.945936618615	8.6557331403221	39.073184249593	48.776717195454	22.906768936487	13.509918276865	TRUE	18.208343606676	11.7236724389578	3.44208476918226	0.56486197881309	0.52357004987533	-0.109515823100068	0.557464150684306	0.16450338180708	0.15764841221783	-0.0614066029696544	0.651270111416737	0.49603398026653	0.60327380463669	0.282373984753974	0.394813358260075
ENSMUSG00000033713.12	Foxn3	3.1690275938594	3.0365633798551	53.101717622725	18.207549810559	15.336702479253	8.1860872503528	TRUE	11.7613948648029	11.1480565192394	5.23770718467562	0.56784484228972	0.60491687326228	0.0912401209670553	0.676815595429431	0.29856334754704	0.30046422058699	0.00915613724287162	0.990379339855623	0.54207397721632	0.5490417965359	0.0184262298667367	0.835819208105354
ENSMUSG00000026812.16	Tsc1	4.488351434848	3.9510298302943	10.759702824705	11.23848649412	10.629168729952	7.6771979691468	TRUE	9.1531833495494	2.73674810800303	2.24503774171276	0.60433644467913	0.66614360128409	0.14048126733533	0.571029228181042	0.3953605795186	0.41875788702486	0.0829473324304509	0.5933151419304	0.44624550757696	0.48312701281497	0.114564874260431	0.425079702708279
ENSMUSG00000021767.18	Kat6b	48.627341768115	33.851717822946	3.7253540992416	3.8176381875295	6.7209829446187	4.8765629130092	TRUE	5.79877292881395	3.00564056207615	5.07217560804325	0.47975048564931	0.51938510624405	0.114520377396099	0.634182501247793	0.10659221171462	0.10780608229782	0.0163365458798731	0.817782315654472	0.091440497513756	0.08599688857142	-0.0885487900301977	0.568978627121654
ENSMUSG00000035401.9	Emsy	3.5304427181154	2.8647083799687	3.4955739075406	4.4591367293321	5.6140744130744	2.6031269705246	TRUE	3.513008312828	1.15507977927811	1.22097766897513	0.54911276438256	0.59684231144717	0.120247367210349	0.642087987227751	0.27025482596425	0.25487478256132	-0.0845317410715274	0.666646323160853	0.28221064081009	0.24295649557871	-0.216074381838056	0.418750913620816
ENSMUSG00000061436.15	Hipk2	2.4879309771262	1.3593836226524	8.1376549890652	14.04023981822	7.2336316250904	3.8396332285183	TRUE	5.53663242680435	4.18814041005038	4.15331108348383	0.51769695405464	0.38329759419197	-0.433642886979301	0.526655720334802	0.19713987303493	0.21900577625481	0.151749319350048	0.202992841307085	0.39650000530094	0.3228119867302	-0.29662673511709	0.175020396640873
ENSMUSG00000036473.16	Tbc1d24	6.5861530498751	5.9097661189207	6.1689017587362	6.8171250275847	7.1010939272711	5.9253450937565	TRUE	6.37752740430565	0.661076464946844	0.389290090610527	0.52068512282958	0.61165764227627	0.232313185679698	0.210623181697408	0.54270433130906	0.5927010591648	0.127138212785748	0.305950810096981	0.52678260748323	0.58735387489605	0.15702226112489	0.672598312539734
ENSMUSG00000038002.9	Cramp1l	2.333112371478	2.7852536601987	3.8859297188396	5.4632570710375	5.5783381218985	4.4542008142467	TRUE	4.17006526654315	1.9852039284548	1.68187933044835	0.50250481211541	0.59270552117202	0.238178084588	0.331716622236593	0.40416820558857	0.43644954059051	0.110859033914761	0.503357902478189	0.37762109201683	0.38545213894792	0.0296123851925835	0.811482161972691
ENSMUSG00000033396.13	Spg11	2.8358917091772	4.0771910617849	14.18680389473	17.189374562135	12.494099927173	8.5930345518283	TRUE	10.5435672395006	7.4942559930622	3.42314354240925	0.67247989391088	0.73693422076558	0.132044715150989	0.48193700972205	0.51990526995693	0.55760212435419	0.100987278603291	0.539086400989744	0.45499759805555	0.52041777420894	0.193811307010404	0.277791998456212
ENSMUSG00000021096.11	Ppm1a	27.761346414974	22.295527306952	44.449923073118	42.108431706544	30.645638747457	23.739770183891	TRUE	29.2034925812155	9.17113207094818	1.36191915600063	0.53579473797477	0.51387903775308	-0.0602516099164052	0.594072806717932	0.34150871204477	0.32688895603931	-0.063121746400597	0.340781896884234	0.6174067790036	0.64999204717993	0.0742007429592344	0.309195980143623
ENSMUSG00000034525.7	Ice1	4.636092645123	6.2213540106983	12.077013627363	13.612608085555	17.033095623231	8.4499721532486	TRUE	10.2634928903058	5.47913664569127	2.44143600223856	0.62667693727472	0.79413330499964	0.34165930113401	0.341878600434451	0.43148986151501	0.41417855031133	-0.0590738211026359	0.827694425857934	0.42924511676338	0.39443625884355	-0.12200954312158	0.549520066252324
ENSMUSG00000061731.9	Ext1	3.7748133226254	9.9239057895212	59.057480674979	69.842250687057	39.674142715299	33.458449913819	TRUE	36.566296314559	36.4227190625899	4.8718481431581	0.54898511695296	0.66472191592521	0.275983882290937	0.674801096824771	0.46067098945787	0.48172654660057	0.0644776812470594	0.382755262990302	0.72403494282939	0.77470342243769	0.0975847878867744	0.0929868495546957
ENSMUSG00000033295.14	Ptprf	12.347382794154	25.556029894428	28.094424971948	46.111205605722	146.39197918581	120.87762902784	TRUE	37.102815288835	26.9108341211809	4.52223393802969	0.68887848188374	0.7525580616603	0.127553379482434	0.454529307601072	0.71647570423211	0.72767526430072	0.0223769869630301	0.938829526914623	0.67519696871289	0.60770794599062	-0.151930271360277	0.203291140759105
ENSMUSG00000005893.14	Nr2c2	11.620544759434	11.642251401548	11.528706500988	13.050787441469	10.215166944068	5.033666334723	TRUE	11.574625630211	1.05789770832992	1.0914016209642	0.53203018142774	0.55323164437985	0.0563755893886261	0.765566454239178	0.35950314527811	0.33324838684388	-0.109406501124439	0.527575919490918	0.45135332184031	0.35321820523924	-0.353697522354618	0.204953644070054
ENSMUSG00000020580.10	Rock2	2.9631945251008	3.0528966780944	26.850554201832	47.772939755735	5.3127449310867	2.5038219310736	TRUE	4.18282080459055	2.14875082592387	5.70667733937518	0.55228537973267	0.67009847293624	0.278959182967243	0.268135612986904	0.37816672210387	0.4108632903111	0.119636020116133	0.439471887804349	0.34773282784887	0.41264917984694	0.246936501312164	0.547518883313829
ENSMUSG00000040760.11	Appl1	2.7672921560246	2.4137232162379	4.0512625117364	6.9436361212756	2.273652420961	1.1522195472315	TRUE	2.59050768613125	1.30108780543709	2.51047530285643	0.57678822486103	0.61488565421266	0.0922764357091015	0.543196822940086	0.3067061612503	0.35530353613529	0.212194898670843	0.478358814067616	0.35897508521839	0.39532252228671	0.139146433810362	0.890951222968386
ENSMUSG00000039630.10	Hnrnpu	28.163360694425	24.846914482881	42.488154571883	59.640942748917	118.45646909781	66.742181121788	TRUE	51.0645486604	28.5984795828042	2.76374422717326	0.60242105442535	0.79598817625047	0.401974808253669	0.209610127683962	0.39226471881243	0.4398153115045	0.165070248359194	0.553972992559597	0.37462556645984	0.45973019559542	0.295338066901396	0.220035380239134
ENSMUSG00000051786.15	Tubgcp6	5.0803228065195	5.6464106068517	8.8026566714544	9.5023078489418	11.344145863211	12.189485946549	TRUE	9.1524822601981	3.87601106160538	1.64936187394763	0.61096047003757	0.67651390208238	0.147040542537894	0.435303455742021	0.63063906796677	0.67461934223521	0.0972591354726731	0.337357637285717	0.48657386584651	0.48001832997224	-0.0195693367872731	0.701562101553686
ENSMUSG00000025314.16	Ptprj	1.8548543258135	4.1602255318831	3.8529990644456	7.0118158937241	14.239612389424	10.072461546552	TRUE	5.5860207128036	4.05060259060355	3.52120224455913	0.62498745424576	0.77166665781486	0.304150541134345	0.664918858604273	0.45795057176749	0.51112814654414	0.158493147597721	0.326890930571515	0.6249816245469	0.69397959366223	0.151079468383264	0.42287774646523
ENSMUSG00000023977.15	Ubr2	3.4994666587286	3.4330312253109	14.897016943436	20.418498145823	18.425631813209	10.454301700607	TRUE	12.6756593220215	10.0022210278013	3.79827725474447	0.6377574864149	0.72446141228421	0.183900918887716	0.409406840307723	0.44706660730822	0.50756337398726	0.183098176520223	0.251542687622628	0.29439505387757	0.24896962830275	-0.241783673639358	0.267495508960005
ENSMUSG00000028890.13	Mtf1	4.8929353436906	3.995703104096	4.9420944656922	6.4344397787479	7.3184288751803	5.0842857709179	TRUE	5.01319011830505	0.843407988054861	0.907413830608079	0.49657691657642	0.56705313803651	0.19146673588736	0.750105227751057	0.34691947056909	0.36681142594083	0.0804377656932293	0.588183489113774	0.52502330622687	0.5647158017032	0.105143534282677	0.382159918688507
ENSMUSG00000032407.14	U2surp	10.212230869335	6.5126626652984	6.2490764188006	9.5164828519866	7.6458035613744	3.5983349162612	TRUE	7.0792331133364	2.42212838892078	1.62411510304765	0.5282237872082	0.60581849610702	0.197736354348825	0.391775062123092	0.1744666273265	0.23538197915725	0.432052773527477	0.347031894266552	0.20485478778308	0.27135662738233	0.405588532965087	0.453312699315472
ENSMUSG00000037475.15	Thoc2	2.3594083244434	2.3131148325478	3.5601611064482	6.0893034739167	3.3944402840868	1.7689657702097	TRUE	2.8769243042651	0.924435402842366	2.03107741276817	0.56807383114383	0.68050394509488	0.260525080105118	0.320934094587416	0.21411372213954	0.30621587908383	0.516171838694805	0.192153895292013	0.14731956885386	0.17508031447648	0.249067800279437	0.999499000354585
ENSMUSG00000026478.14	Lamc1	14.080340000711	20.318971046182	27.31769796522	58.299246064302	69.710962753829	71.813592254112	TRUE	42.808472014761	36.6142834528787	3.62015126539714	0.80562667146484	0.92663736716784	0.201893414332501	0.233766893607075	0.6077423893526	0.69543395086802	0.194453578946056	0.20178421882646	0.47106484020475	0.50585569666087	0.102800237278171	0.123651472343158
ENSMUSG00000057110.15	Cntrl	2.0533948233831	1.8395066563171	1.5706889362183	2.0334033807916	5.0828737612039	2.3286695814032	TRUE	2.04339910208735	0.362616476366326	1.41994566536151	0.56469746798366	0.65055284275291	0.204188085640088	0.304738645696219	0.26844501482446	0.25311726556628	-0.0848206939575162	0.972229938062059	0.27036104223572	0.19613553655646	-0.463036328978574	0.262870044050469
ENSMUSG00000039068.16	Zzz3	8.4059345427717	8.1118659639646	17.3278370744	19.119743483537	9.5370407391337	5.7353554839744	TRUE	8.9714876409527	3.03618231711929	2.08930341466798	0.50256116650569	0.66400578579559	0.401896615731965	0.362929591779462	0.24485732452961	0.21946330299774	-0.157961629374005	0.671517007240047	0.42297077147113	0.44904696772675	0.0863083781475757	0.960976684117965
ENSMUSG00000025907.14	Rb1cc1	1.695052367594	1.7342883690081	10.107904960067	19.130372944821	2.6153677955863	1.0972333897162	TRUE	2.1748280822972	1.15447868291978	5.05489708725394	0.56826425763313	0.58653936574485	0.045665961944392	0.703105378318154	0.39777362224825	0.46746361186314	0.232906458394734	0.160303834507547	0.36108120724795	0.4149367098987	0.20056796358798	0.931470689274047
ENSMUSG00000046111.17	Cep295	3.5678273759018	3.1082492280743	2.0702581762267	2.1317674625344	2.4234152739264	1.2583310217703	TRUE	2.2775913682304	0.769462766734626	1.57678325674615	0.55023972818697	0.62853567631141	0.191934327477968	0.38721263931362	0.12311604445938	0.19411907044195	0.656923070929545	0.292838862762056	0.15021455082136	0.23175102777279	0.625551167898786	0.632637303950669
ENSMUSG00000040651.9	Fam208a	8.8451316351812	8.9056497028779	2.4549150252213	3.8911065153834	2.1772772854481	1.1077473052465	TRUE	3.17301077030235	2.26911703896836	3.9467508610511	0.50642573113898	0.66773900915164	0.398933615629095	0.0956449197432396	0.26724742715151	0.29182632226056	0.126933958998676	0.54562626890313	0.16925402900872	0.20787415202149	0.296520201502898	0.77906335948288
ENSMUSG00000038708.10	Golga4	4.0093680796624	7.0825260880719	15.36543003819	16.714414352264	7.7434246189659	3.8504554228784	TRUE	7.4129753535189	5.16399009669363	2.90078000042431	0.54942687067521	0.73870015426828	0.427061409294605	0.106962398455175	0.42400280359596	0.4168053178635	-0.0247001196824273	0.908599142044006	0.3374035975019	0.32309891599631	-0.0624994458308302	0.705807077800414
ENSMUSG00000019947.10	Arid5b	10.038238438036	6.861389468645	15.342651507373	24.907581197481	4.0118738688875	1.7059396173713	TRUE	8.4498139533405	8.28907902985898	4.40292604463669	0.50486831660759	0.7103716607046	0.492666885698538	0.47693536764904	0.29535267486027	0.33697035057104	0.190182979008734	0.280118467008987	0.30264957296303	0.36245819290229	0.260166284207378	0.216896512819519
ENSMUSG00000071064.13	Zfp827	6.2225947905912	4.1136478938539	7.223228026906	6.9915081789739	9.0054586844969	8.1102708523253	TRUE	7.10736810293995	1.39933426456349	1.08107064272196	0.52398237783495	0.47985154207264	-0.126930163496326	0.863323288052513	0.19876687686242	0.19401936190628	-0.0348767302450606	0.882910919481759	0.12884803017492	0.10454773891104	-0.301508620868591	0.213507579169315
ENSMUSG00000056900.13	Usp13	1.412357059606	1.0713623127823	4.0736651917956	3.6962275860264	1.5693985306143	1.3350839421913	TRUE	1.49087779511015	0.426476810218379	2.45936312709424	0.53625750346169	0.65377744137833	0.285873668365982	0.365317902896928	0.37457112103708	0.41411014395136	0.144774869189133	0.450587690567072	0.33342505647213	0.40370301179745	0.275931824872242	0.161031232975408
ENSMUSG00000048874.15	Phf3	6.9066523055494	5.6772034356068	8.8763843935661	13.888673318329	8.510995635964	4.0161732088085	TRUE	7.7088239707567	2.37155284413523	1.89655356255876	0.53469026680324	0.73865753423248	0.46620222384427	0.092356212823789	0.24346804742208	0.27056790302609	0.15225825876633	0.56891509366824	0.28277422964399	0.28910788919984	0.0319573302125583	0.803699477614162
ENSMUSG00000022883.11	Robo1	2.4824103333024	2.8939911385725	5.7288607918009	9.4029995225405	12.083637493903	7.0946798851684	TRUE	6.41177033848465	4.82512791503548	2.97484293272726	0.70142576041727	0.72265038138106	0.0430074236912445	0.794164018710494	0.51271309059085	0.52042272795012	0.0215322358486375	0.870882203508548	0.43577303062639	0.46098883395581	0.0811548933334535	0.835908476651764
ENSMUSG00000029910.14	Mad2l1	7.7881166042402	10.230890748728	8.1828940410878	7.8188714412485	13.543333630309	8.953271947557	TRUE	8.5680829943224	1.13357960926162	0.912139968196847	0.67676360299764	0.44622929756412	-0.600866742945078	0.168837299002099	0.61523361605762	0.63685650958074	0.0498340212531092	0.640978867991665	0.63418959901359	0.63241304665624	-0.00404708606184562	0.962852995690614
ENSMUSG00000050229.3	Pigm	16.612171325314	17.872203678369	17.395555575928	16.738441271285	18.404992719238	10.357217338347	TRUE	17.0669984236065	0.934061983319671	0.686556167101402	0.57296615930886	0.5170007077874	-0.148283677002802	0.907203384456962	0.55648916411021	0.57732236090357	0.0530235091697111	0.389724771899474	0.67228873198874	0.7777855785286	0.210291515760047	0.243457579981051
ENSMUSG00000031441.15	Atp11a	4.9356052056586	15.264620984294	47.182341204196	64.472962564997	27.010574707984	16.548503312087	TRUE	21.7795390100355	17.3159168616668	4.18818533062903	0.6158409089252	0.63564282455651	0.0456586197252232	0.776145596717905	0.65820874142616	0.68012710876328	0.0472592099427084	0.575984156482979	0.71209242198395	0.72262099865927	0.0211746789483744	0.936451790345996
ENSMUSG00000041341.10	Atg2b	4.4483533733783	4.7808420450795	13.429804436198	16.488302089015	16.094746759521	11.073186513727	TRUE	12.2514954749625	5.98974692024034	2.7169432975267	0.60710537133287	0.77331011654922	0.349100149292298	0.307030942106077	0.4606513389885	0.52019695782354	0.175382755681456	0.43190425763846	0.37515316435807	0.36679643488244	-0.0325001106267706	0.738588591543664
ENSMUSG00000024759.14	Atl3	4.5323280106459	4.940798069438	37.769345235891	51.356824414613	11.098474050396	4.4076589461751	TRUE	8.019636059917	5.26270009134154	5.38499696938841	0.57449280213704	0.65553041005814	0.190373891276337	0.76978886220038	0.49042129826919	0.53804287930446	0.133699518389897	0.326037631195024	0.46038785113062	0.43262648511213	-0.0897277747948694	0.547725438635696
ENSMUSG00000054199.17	Gon4l	6.1049848867472	5.4033951072458	5.4463483168052	5.3453169623839	13.991354004168	11.313572995565	TRUE	5.7756666017762	0.594983046576897	1.8153546811754	0.58176298398415	0.7086466822788	0.284635001937556	0.341207945706574	0.24903827620374	0.29820536128571	0.259938699460635	0.352666102395027	0.252976770741	0.2563293820558	0.0189939412897173	0.857944157439503
ENSMUSG00000027678.17	Ncoa3	12.888454627273	14.787995114446	7.8816184386764	9.9073174056878	8.4271789925824	6.4021939995105	TRUE	9.1672481991351	3.00277201960975	1.49078515782211	0.55466650442006	0.73261524775522	0.401435122204405	0.471817495049625	0.48604270392887	0.48892540876385	0.00853130689068963	0.905167175159825	0.42860917445791	0.43483904651787	0.0208187619698389	0.879145116238993
ENSMUSG00000069895.4	Atxn1l	2.7083385850665	1.8893394111562	24.320054344761	24.735058299584	20.37337290861	11.488543564568	TRUE	15.930958236589	12.7453163216861	5.33983873624218	0.65249439632117	0.49172667913594	-0.408108879561764	0.464674812059406	0.34641318202651	0.36079571173114	0.0586883615769053	0.700152201666182	0.54419124892113	0.61157622151604	0.168418557905431	0.321482144537077
ENSMUSG00000001089.14	Luzp1	10.826346995932	7.8100718333781	25.103874722621	37.912406113435	11.835477477962	5.8620821653721	TRUE	11.330912236947	6.6640427232241	3.1235004687955	0.55364979391001	0.73172307997173	0.4023240637081	0.327456991056859	0.23911458540057	0.26551397621543	0.15108567052637	0.539596824131084	0.32040439999579	0.47620694083251	0.571694688511115	0.225213790864888
ENSMUSG00000046138.15	9930021J03Rik	1.0864270847777	1.2639068212107	2.5629628825713	3.5625372703796	1.7212735538654	1.007749701615	TRUE	1.49259018753805	0.660500960291004	2.42987961697643	0.55920170744339	0.60198809035995	0.106366179424386	0.399987521375041	0.14701965694719	0.13720160056615	-0.0997117485993246	0.775645522231093	0.29896954407755	0.40874138401957	0.451189794864612	0.682476072089467
ENSMUSG00000074305.9	Peak1	2.0116424085883	1.3963161072423	10.954773839851	22.946931241563	4.4589552470042	1.9748643346164	TRUE	3.23529882779625	2.29759798054087	5.30858540167631	0.49567505610731	0.58359191954071	0.235565247940745	0.267758479419319	0.18673088353523	0.24307476299548	0.380439559195842	0.246162738142256	0.29123498306358	0.31626722295681	0.118960384691749	0.961088444160909
ENSMUSG00000021990.15	Spata13	1.6557132547427	1.7028429558663	5.790978990367	4.5178250675568	16.355632473516	11.486029475115	TRUE	5.1544020289619	5.15221872921446	4.44744339550729	0.57676899109571	0.69630269733841	0.27172100926098	0.481460530502964	0.5757709097611	0.63228506804227	0.135080249380518	0.433014200424599	0.37457498970992	0.37521406727591	0.00245934306423882	0.819354267184085
ENSMUSG00000052942.13	Glis3	3.5443602736079	1.9968180271436	14.196270257275	13.459347047196	14.599603560231	13.752931941953	TRUE	13.6061394945745	1.17391884626104	3.39863925611498	0.4083728277224	0.43925816549914	0.105182229679759	0.699895057657096	0.10023418700637	0.11033436742755	0.138507583475716	0.564177178396994	0.087702697765162	0.060807458319069	-0.528372933334524	0.0963864002331379
ENSMUSG00000000631.20	Myo18a	2.9657258133462	2.957452079115	9.784925549677	13.71674678853	43.843640275161	36.336175829078	TRUE	11.7508361691035	13.0309379326314	5.53976807666922	0.60483764120818	0.650854405212	0.105786925155688	0.308497337259592	0.52718932627496	0.51582130157053	-0.0314498086634222	0.919173851276942	0.45663608368965	0.39964709794265	-0.192318253725909	0.0683386839940432
ENSMUSG00000075592.10	Nynrin	7.6041095931508	8.3120101186318	12.972405558957	18.807012519525	2.4342391415163	1.8317429811159	TRUE	7.9580598558913	7.81194276524879	4.09116469042601	0.64988081678478	0.82177954121727	0.338576250974281	0.233016423771063	0.62219131343011	0.64440583827292	0.0506113116388371	0.817369807017597	0.57147725623441	0.50265659807968	-0.185122958114577	0.58237430393942
ENSMUSG00000079020.9	Slc45a4	10.267930988738	22.659074687028	9.6221831483673	8.7760719491378	16.704732951153	12.57317532686	TRUE	11.420553157799	3.29348560797226	1.70269247111793	0.63184041101438	0.61753233254794	-0.0330455365779903	0.836829131268351	0.69355672342955	0.66469628552438	-0.0613185882389114	0.430957449975232	0.72803123298323	0.7285117675574	0.000951931899059531	0.613493296313188
ENSMUSG00000058690.14	Ccser2	3.343047298659	3.1479871327081	12.282370043552	18.025944101665	22.948034217643	14.116320873777	TRUE	13.1993454586645	10.804660551087	3.81056507035686	0.55928531162488	0.59730673254952	0.0948875415550656	0.53242707074513	0.19625554973625	0.19976201536928	0.0255488303161783	0.859675482098607	0.41716366000959	0.49466560830738	0.245840112239044	0.828954618951367
ENSMUSG00000030761.15	Myo7a	2.9860566505879	2.7550869027998	6.9539387029399	4.2632130252117	3.3454047989137	1.511176299867	TRUE	3.1657307247508	1.11797389454394	2.07662801766813	0.65467346770759	0.55749371236778	-0.231819977412754	0.400133004436347	0.42180517979137	0.45827069996608	0.11962323677291	0.694866583913257	0.42956587769064	0.44812719060768	0.0610288679922775	0.677811351939817
ENSMUSG00000074405.8	Zfp865	4.621452392125	2.6636449415521	6.2843628321647	5.1890280180959	8.8139995974225	8.6794946795721	TRUE	5.7366954251303	3.00822674768454	2.01841819909071	0.50579776789884	0.52459977043215	0.0526565059140028	0.929560109696042	0.30931043044363	0.32279771263413	0.0615748713824376	0.679202490280632	0.30419632937029	0.33517613353256	0.139916679838659	0.0583563916210414
ENSMUSG00000038119.15	Cdon	2.133248366555	4.0357037407504	9.6732556450231	13.842796447028	31.881919678049	25.031988646297	TRUE	11.7580260460256	12.859405218692	4.8877671099343	0.65449641926847	0.60775579345388	-0.106893558386324	0.897529846555139	0.50862369641437	0.54785778449394	0.107202762481608	0.452360414928906	0.62575418847873	0.6532237669104	0.0619812402989604	0.768067559739875
ENSMUSG00000045180.13	Shroom2	2.1885898112078	2.2720542980218	2.8120875190576	3.3987681177767	8.1090779841952	6.4623618614475	TRUE	3.10542781841715	1.29743180541336	2.54452317394489	0.58367370825678	0.69760946102131	0.257257523076475	0.600784871751204	0.32814640814572	0.35735936221666	0.123035943354567	0.62784450165806	0.48862220394493	0.50493779900769	0.0473862557970519	0.860975804796775
ENSMUSG00000026469.14	Xpr1	2.1926936307955	3.4371980225	11.761790661053	17.357231746733	11.803148751669	4.3216339210713	TRUE	8.04171229106215	6.20167927553298	4.30381085134685	0.65551797162182	0.63930175476878	-0.0361382800002386	0.946746779121821	0.44309450288122	0.47794837703314	0.109240373273301	0.518726071452319	0.64827776327855	0.72434564357666	0.160066199914282	0.650644800337585
ENSMUSG00000040111.16	Gramd1b	5.2680930216334	4.1123268642507	2.026542695519	2.0597920687421	2.4651941441596	1.4086498184504	TRUE	2.26249310645085	0.807864069018514	2.20636007589608	0.56314431592191	0.59638285930626	0.0827341071895664	0.68631057739255	0.56998306251492	0.56850932954419	-0.00373502440743724	0.988985139358163	0.40009905826412	0.48992160615439	0.292193684741712	0.377650764070972
ENSMUSG00000005374.13	Tbl2	9.3283278170501	15.606683619132	13.153511704696	10.055996665877	20.527632508351	14.60096159646	TRUE	13.877236650578	4.11472423844793	1.33264486986634	0.64789362351658	0.62684751158413	-0.047642426779694	0.781822303303721	0.70344220959322	0.71818239286732	0.0299183784366015	0.618694937262851	0.70050047466852	0.71304488778673	0.0256068721944634	0.723090916181345
ENSMUSG00000039046.15	Usp6nl	3.9531815084839	3.1907736393943	4.1802795240791	4.5620553493835	6.4677418572156	3.8932196446335	TRUE	4.0667305162815	0.495807907931175	0.92095780781754	0.57337208928991	0.55589447963279	-0.044660623191739	0.894518369060326	0.30981524052865	0.30657699830966	-0.0151586560535035	0.851884306115568	0.5325694290948	0.57766546338388	0.117264627136224	0.81892382704904
ENSMUSG00000020422.13	Tns3	21.62911830017	19.207716057943	34.25677666059	56.726703639223	24.699738375079	23.178579816852	TRUE	23.9391590959655	5.21985196600929	1.60634099777601	0.56936159707952	0.69362919666994	0.284819438754551	0.323944776871901	0.63178018891493	0.65548938682947	0.0531497232504667	0.623285337850114	0.49837919982585	0.5244167155173	0.0734698136469767	0.763774632639219
ENSMUSG00000007817.15	Zmiz1	3.7463059131924	1.8560660143002	4.5293935720871	8.0188275182201	11.384232103188	7.2899899645346	TRUE	5.90969176831085	3.16722026580703	3.05070610732636	0.34271642609743	0.48884224224671	0.512353617298866	0.135314816809807	0.37408401362869	0.40872599100426	0.12777167361761	0.514811900395999	0.27553604209119	0.26112151018372	-0.077519739798678	0.517802086714376
ENSMUSG00000006005.18	Tpr	4.8260245563447	4.6373697166137	11.769782041676	21.411778270075	11.387276015515	5.3994684024551	TRUE	8.39337220898505	5.14740742387609	3.16750225875868	0.59408855577853	0.8321831307709	0.486223046272997	0.115871355960472	0.24637031872117	0.29431917061972	0.256553057067471	0.308742390564625	0.23203334381138	0.21504523727035	-0.109691959936338	0.360477959074662
ENSMUSG00000063273.11	Naa15	8.8624000983569	5.0611502390196	5.2050283797983	8.5020136864389	4.2148981743015	2.3175613809175	TRUE	5.13308930940895	2.76780594184586	2.07101109898682	0.50431479577888	0.57416104947882	0.187130910600523	0.452288261175402	0.24826788084813	0.32021033164008	0.367122229550632	0.233525828097108	0.13884909648718	0.12673828047552	-0.131665442365026	0.481815573574367
ENSMUSG00000024477.4	Pggt1b	3.1069638836298	3.0080301357934	3.1721516111281	6.0100316817581	3.3622989185372	2.5433889980777	TRUE	3.13955774737895	0.262619448647979	0.992036187675452	0.46274527483443	0.61930861767924	0.420440262713564	0.197174625706736	0.47000088059894	0.48745170120364	0.0525958177151731	0.686606735383728	0.56283376379432	0.62008565625871	0.139758640735334	0.4014659303303
ENSMUSG00000041459.15	Tardbp	56.094628300812	35.414003115496	21.051551601123	26.638255582709	34.148103468686	20.355290084294	TRUE	30.3931795256975	10.6468853076047	1.78219095185266	0.46815590146618	0.60955279548624	0.380762138712636	0.183920054530125	0.60695732110924	0.63214909506462	0.0586697890105734	0.409019704033402	0.44701975881257	0.41507991464326	-0.106949478809187	0.399537253341896
ENSMUSG00000026135.17	Zfp142	4.8446592035826	3.8095177484194	3.718249115534	5.0042779729825	5.0657522396809	3.0029690898709	TRUE	4.327088476001	0.953333192026573	1.06031569676141	0.5101221141573	0.60011067351537	0.234385945785052	0.467601922838239	0.36794922863762	0.43135224187083	0.229359743949872	0.241552655576003	0.408833484336	0.45296773527425	0.14789493037096	0.372088868769026
ENSMUSG00000048249.14	Crebrf	1.5265680872094	1.1449446223403	3.3693489562849	5.0035279493582	1.8180346659964	1.1759163701847	TRUE	1.6723013766029	0.758899767192677	2.70219271502386	0.50701965568868	0.56291777219067	0.150882519618284	0.329030980818748	0.17927512405617	0.17141780783794	-0.0646583234786813	0.957747526974297	0.080846755699917	0.082530630183769	0.0297397755448077	0.87164130767222
ENSMUSG00000027177.14	Hipk3	3.0210378006745	3.2643667393956	28.031632350259	40.301696216062	6.238266903373	6.0294504518996	TRUE	6.1338586776363	4.43468848990961	4.77510748551451	0.49611666355122	0.55140950358793	0.152444717288491	0.457640271978644	0.27936875571452	0.2236913610094	-0.320661139993175	0.185797065470503	0.20030240542913	0.16294396834344	-0.297803797382202	0.256671290826101
ENSMUSG00000061410.6	Zcchc14	2.1359870966346	2.9199769471987	20.008112760628	22.020420871489	24.380423781502	19.053194125935	TRUE	19.5306534432815	5.44079934625308	4.50414922003659	0.62990610420518	0.57589600509346	-0.12932847765271	0.952068183170585	0.39463708438697	0.38375599337195	-0.0403372515438752	0.769902529591114	0.63635765063309	0.66978333462672	0.0738566516907792	0.48441932159565
ENSMUSG00000030536.10	Iqgap1	13.184318364302	12.787065714608	36.928385119794	60.814813838574	11.584047011456	6.1032650293467	TRUE	12.985692039455	6.14098260184894	3.48895508674733	0.58247820632055	0.80543465352102	0.467563473322589	0.345504595486652	0.32628302842745	0.39825241219636	0.287559152341884	0.116702604507376	0.36920183183845	0.35339617362364	-0.0631232918250254	0.638921883790592
ENSMUSG00000010277.7	2610507B11Rik	36.879955440651	87.951787517735	89.5320730356	76.417785982241	285.88056996806	166.07547628789	TRUE	88.7419302766675	47.5811701113974	2.8419409609808	0.59176981567404	0.61989911322388	0.0669973291350072	0.655230359355047	0.46405599165235	0.46367251838126	-0.00119266576814084	0.992974876826681	0.77665182740263	0.87563383244358	0.17305971381021	0.127471081099069
ENSMUSG00000020850.14	Prpf8	12.794564260547	13.910127483329	29.662167678899	49.12397783563	59.597296441892	46.624878663785	TRUE	38.143523171342	24.0434931680954	3.25258174682288	0.69530485440809	0.86129420771109	0.308860467006369	0.286272792947698	0.42445273684735	0.50927484201121	0.262840532922587	0.207522750464539	0.36382706146801	0.3869624292707	0.0889406451863316	0.262752318721815
ENSMUSG00000056537.11	Rlim	7.5678235536455	7.1181694307661	29.493656877518	44.801417853956	7.2434186044266	3.6578444422737	TRUE	7.40562107903605	2.99131472769444	3.97070263170628	0.616196754997	0.60111812557011	-0.0357425624739458	0.767985204574451	0.47244668228447	0.46738111154681	-0.0155520928419062	0.938592593905816	0.39404173323463	0.52522399182472	0.414584384315863	0.536510685614814
ENSMUSG00000056493.9	Foxk1	1.6411720399709	1.2986398049288	8.9306771149614	11.285272538817	10.083279840855	9.8022011177785	TRUE	9.36643911636995	1.95382524512077	4.07076384090854	0.56452012791671	0.57525928623925	0.0271873465503229	0.864705605718094	0.47841779161625	0.46814015136204	-0.0313305349558018	0.820401729873946	0.39165443482333	0.46151423805522	0.236793862222537	0.0706004855515462
ENSMUSG00000042390.9	Gatad2b	8.7387321236903	5.2967274759132	5.332872536812	7.1340773378311	9.2416229872643	4.6078594414364	TRUE	6.23347493732155	1.89947966024167	1.48762293628643	0.45451487439407	0.49432252897874	0.121125150831965	0.888071408451875	0.17852919344004	0.25037453829107	0.487927849768775	0.0603440395911828	0.16309306817279	0.15072497626524	-0.11377696333103	0.521066984746795
ENSMUSG00000022443.17	Myh9	10.951161251339	13.224326227998	381.95916493638	567.6100117345	185.91468851698	137.0865680645	TRUE	161.50062829074	221.519542635419	7.61592005272329	0.7242449296888	0.86311077247969	0.253068048700597	0.313365175237046	0.57958173298279	0.61382813886989	0.0828226574370063	0.681986479899326	0.39655214460031	0.34837083834069	-0.186886722591438	0.0241649026562924
ENSMUSG00000052565.7	Hist1h1d	67.510812688317	279.45752873205	83.963096600611	43.742441031296	269.97191736606	412.69517484793	TRUE	176.967506983335	157.116100603219	4.83289354485458	0.44879768904664	0.59291942971662	0.401770826776307	0.422913807725811	0.87133930743095	0.80645401819401	-0.111642349579924	0.00471957619650669	0.88173420159329	0.82084526079807	-0.103233539231138	0.0306847659513283
ENSMUSG00000020196.10	Cabin1	10.576607020035	11.742777425626	13.855360467971	15.049871874399	26.349596470203	25.107883494765	TRUE	14.452616171185	4.88208904583038	1.75544908173604	0.51250655210368	0.65755074277491	0.359531781796197	0.255365598077532	0.61672031153585	0.62244936597236	0.0133401219626012	0.98204230855806	0.47521257953353	0.46021997675512	-0.0462494188323295	0.466043113526732
ENSMUSG00000041852.15	Tcf20	11.433401067708	7.4445545620345	82.841452552561	63.459112046993	54.895651056963	24.86880005318	TRUE	39.8822255550715	38.566659548944	4.91512266267609	0.60964771612196	0.70739348739257	0.214537112336435	0.106222811795011	0.056757728447301	0.075016017828176	0.402381829451556	0.356921262474204	0.15525120424885	0.54271029513435	1.80557781750054	0.0487362587381254
ENSMUSG00000034021.15	Pds5b	2.6237095733733	2.1735331526115	2.4298989260931	4.2326061247629	5.7202722172195	2.4402999554919	TRUE	2.5320047644326	0.341426063804052	1.59509883620276	0.50193253664572	0.60247077298286	0.263397786542148	0.203873341462514	0.28532815043865	0.31929963955926	0.162288834276768	0.613261086402846	0.24885922011034	0.26101718333262	0.0688149465556461	0.819320047616999
ENSMUSG00000033610.16	Pank1	3.8517984323008	3.7298913635187	2.4473441160173	2.9991955483277	4.1654741424517	2.6680961935861	TRUE	3.3645434559232	0.877478469559207	1.11703669512634	0.55587260473932	0.53261608905753	-0.0616582734309772	0.414966762990854	0.51717116297346	0.52768610695155	0.0290381664685423	0.669685351303278	0.54429009842975	0.52278054986993	-0.0581703247621164	0.707565466925306
ENSMUSG00000069114.8	Zbtb10	1.8849983094362	1.9504562916217	1.3059818376953	2.1267022979051	2.4542309700783	1.8227179560511	TRUE	1.91772730052895	0.22534359261637	0.819238548115744	0.47432566308209	0.83216874121973	0.810998170794072	0.196563671431474	0.33295318223139	0.31036586416572	-0.101349438615784	0.477476140896902	0.34589425299835	0.40721173062528	0.235448078338239	0.246939863075646
ENSMUSG00000034111.6	Tmed8	2.5304495497418	4.1521007210546	9.504958717951	12.141297352003	5.2637453939979	3.3218962920726	TRUE	4.70792305752625	2.6416227525514	2.85672193321476	0.52159248990959	0.67238843935235	0.366371822707935	0.596567740418585	0.5408448498094	0.5108716865082	-0.082253811716307	0.434721691118615	0.67903474444193	0.68072438089274	0.00358538705522741	0.934135028444967
ENSMUSG00000036333.11	Kidins220	1.5837553440719	1.784710614153	29.168307746826	44.379852298357	36.771077891354	13.96434416444	TRUE	21.566325955633	25.9353940625891	7.09501762379238	0.7578398298775	0.85968529034959	0.18191565553936	0.317302224389007	0.49657476112432	0.54867565387649	0.143942624151751	0.459513480037844	0.45772130168448	0.50892006127453	0.152969628037765	0.477539446885342
ENSMUSG00000011960.12	Ccnt1	8.587541689767	8.3380796364287	8.876886633749	12.150062696906	9.3126530682105	4.2655384675945	TRUE	8.732214161758	0.722451284979848	1.19044537334782	0.53574125206278	0.73020850247009	0.446772079642029	0.269493620611048	0.32418168005424	0.3653089969367	0.17231472074392	0.216795188415215	0.35516396354023	0.43745426417847	0.300646984050327	0.371668201008248
ENSMUSG00000079470.8	Utp14b	1.7441178628821	2.066251117394	1.2766740784572	2.0343089447886	2.9130171842794	1.3274987184582	TRUE	1.88921340383535	0.547637153331109	1.42127773044523	0.47497575622716	0.82766864562329	0.801199428071038	0.181278190007982	0.33849635593017	0.36382192392526	0.104092179871523	0.835310675797487	0.38337684651167	0.51340775425111	0.421341875650791	0.360189783331442
ENSMUSG00000022024.10	Sugt1	20.19027108819	26.648443564558	19.114176280768	25.180713499008	21.50771361048	14.567236722207	TRUE	20.848992349335	4.49712403988131	0.942814674197033	0.47427660125087	0.63404590841958	0.418858609360654	0.781058930864529	0.54936275335818	0.58509185355567	0.0909040317278791	0.290016600614721	0.47603395552944	0.58350046582649	0.293669322957332	0.0631093855040305
ENSMUSG00000049323.8	Smcr8	11.851794237914	10.538281479533	17.234259471928	23.220371693105	12.103194589565	7.9092348254124	TRUE	11.9774944137395	4.08268938095416	1.58987385659411	0.5131226429615	0.64002076369385	0.318815020241604	0.349066482250404	0.45161609645693	0.45229435968994	0.00216509761487824	0.992664328744951	0.45412814541005	0.54546311953019	0.264382201558685	0.285037532899451
ENSMUSG00000024750.11	Zfand5	7.6303015151017	6.6306123931025	18.570389581933	22.932665463536	11.31157635392	6.9055032013772	TRUE	9.47093893451085	4.00729157411798	2.62381415766818	0.5406376514688	0.65304489968389	0.27252019819808	0.57753006281721	0.50935656894317	0.45163652854145	-0.173513774708839	0.225076847611136	0.55331557913546	0.56226521899668	0.0231482615517777	0.902881908614409
ENSMUSG00000030231.11	Plekha5	3.6148821957934	2.883157496169	7.6659476824391	6.1476195611502	4.3661138691312	2.7956288670742	TRUE	3.9904980324623	1.70662805185642	1.95472403228174	0.60130239245771	0.56919337626172	-0.0791718254989565	0.853751369463587	0.30487702724107	0.29348405832936	-0.054945305917069	0.946065955576217	0.29404760474254	0.26552575603879	-0.147197929164642	0.240158931250792
ENSMUSG00000032340.8	Neo1	9.9592614937822	12.527400638699	31.233105324771	70.434613748229	33.283313819525	18.790120505283	TRUE	25.011612915027	15.3863584409463	3.44146715550092	0.70118222104865	0.72268057265069	0.0435686957425551	0.768635589189218	0.60760867031758	0.65752781787094	0.113909474815347	0.212541743279642	0.52261491899369	0.55141697534705	0.0773953717338705	0.953379733162927
ENSMUSG00000018846.8	Pank3	8.0936271086712	5.4026435363436	23.672905646371	29.261259389967	10.860604929869	5.1564315451809	TRUE	9.4771160192701	6.22332985223574	3.50752749193785	0.54853003543007	0.56250006929582	0.0362826547438238	0.699282532051377	0.27407618221911	0.29013647381392	0.082154711437802	0.70784251913683	0.48482469001205	0.63683991292243	0.393467586454964	0.253113275492602
ENSMUSG00000027854.12	Sike1	6.0531663703764	8.2606158834282	13.834971517698	14.08031012394	17.802841814436	12.038832490092	TRUE	12.936902003895	4.3141393404914	1.7511169129425	0.57863660781857	0.46247417811223	-0.323284783071338	0.487981205772165	0.66761181088904	0.62635242067018	-0.0920348520177258	0.0174864997573152	0.76958704237506	0.75891411125906	-0.0201478880311061	0.87812994063295
ENSMUSG00000061136.14	Prpf40a	6.551036409927	5.997742028787	9.6824831396601	16.382196650729	6.882102999716	3.3749788525345	TRUE	6.7165697048215	2.73149858549023	2.10804244407491	0.54418942175021	0.73116599109941	0.426090054563447	0.176904310310435	0.3638248926473	0.40734704549078	0.163014189724311	0.546245576615061	0.34094448359469	0.45084256646096	0.403086891921833	0.326903265937354
ENSMUSG00000042035.11	Igsf3	3.2625419476986	6.286881281419	6.6176765089301	10.410329408735	8.618055376428	4.0192697097319	TRUE	6.45227889517455	3.40907981472182	1.97433034025816	0.6890477870245	0.88273376887375	0.357374348336472	0.261883900889877	0.72802304232513	0.72332983072499	-0.00933046239484177	0.683897141679074	0.56327914490202	0.56516795960914	0.00482962142410015	0.859928978047482
ENSMUSG00000022623.16	Shank3	1.5609946522296	1.2829947438369	1.3643850873905	1.1445321146258	3.7157846709275	3.3209858112481	TRUE	1.46268986981005	0.36905834080198	2.26327800788541	0.51837064697246	0.54978067175945	0.0848721608360596	0.872556364850017	0.44472996278474	0.36649124936449	-0.279150854793788	0.231473762262145	0.50592259334947	0.47876918967405	-0.0795863548183012	0.473782101448268
ENSMUSG00000042410.16	Agps	15.264355546114	12.893738824214	30.300776707509	41.915239249467	7.3818861118595	4.5285323999232	TRUE	14.079047185164	12.0444021139396	3.80617429846248	0.56912023244882	0.63186282035277	0.150877909454674	0.661644395996365	0.42973510662471	0.42778699992364	-0.00655500001774344	0.924141620291578	0.49924542029473	0.59577869748594	0.255027346345431	0.382333306195276
ENSMUSG00000036990.13	Otud4	5.575636403723	7.1676023739118	20.855974470772	28.642358269716	6.7095728914337	4.3029520698492	TRUE	6.93858763267275	2.96415238874155	3.28085525942736	0.67215508532027	0.7030250187576	0.0647818895797621	0.639589553719909	0.48666334734646	0.47423701808639	-0.0373158419176521	0.765654722038685	0.45941611962057	0.45311352672158	-0.0199289176930377	0.69962293019441
ENSMUSG00000032411.15	Tfdp2	10.57398826661	9.3967020812624	5.581877517509	7.4602073266804	8.677820521106	4.4443050847041	TRUE	8.0690139238932	2.8279294491104	1.53879432014457	0.55949220356038	0.56815859518012	0.0221756706876307	0.612136909685134	0.27725900290743	0.31225927079168	0.171510098169022	0.39544187136331	0.44619522276542	0.50649891357412	0.182884107186167	0.530003132182545
ENSMUSG00000025041.17	Nt5c2	4.0487135681482	3.227091436305	7.3088830628287	10.441312012482	9.8704704876712	8.9397150949716	TRUE	8.12429907890015	3.0120385529862	2.26675058021435	0.55638478875111	0.59337214098269	0.0928542154573136	0.840866318237611	0.4356341091332	0.53015596884202	0.283299936589189	0.181192785969285	0.47848705686388	0.5821383771438	0.282882229423266	0.0358701805984612
ENSMUSG00000036591.16	Arhgap21	4.412110349093	3.7947121625424	16.520024025685	10.521150239649	12.695196506775	5.9434086271042	TRUE	8.2322794333766	6.12145996004883	3.09893997082284	0.5676825594103	0.60117051786869	0.0826898402834222	0.575210058277761	0.17652614345362	0.2351945460585	0.413972743916138	0.212844037651301	0.34544447606972	0.29983037571609	-0.204307292555223	0.435820365457233
ENSMUSG00000039929.14	Urb1	3.3248035962264	5.1014355479397	4.3652217574298	5.015109083363	8.2587456482208	6.731736932912	TRUE	5.05827231565135	1.75429769958495	1.36009312830939	0.61767101719798	0.78132142389729	0.339077536439348	0.389214048522557	0.47703559752999	0.55727075956898	0.224281528488496	0.207756531070275	0.42673189975992	0.48926519488172	0.197286695390947	0.198287079638919
ENSMUSG00000020859.16	Spag9	2.9817395755778	3.6728964949834	30.839251112679	43.6100602946	29.751678683812	11.500590265679	TRUE	20.6261344747455	20.1384186780977	5.76107585822812	0.54054743669623	0.75578320952596	0.483551238281671	0.12087816149008	0.39737691162518	0.41538830030225	0.0639525306321774	0.674439395249141	0.6648453711237	0.69020434803821	0.0540047227786195	0.966565659272908
ENSMUSG00000022946.10	Dop1b	5.2162480286012	6.7041671744937	2.9375994050539	4.9985639049384	5.3331870014186	3.7654956900302	TRUE	5.1074059667698	1.16212956913222	1.21583378930217	0.43650418815987	0.67999562412606	0.639529966176896	0.318384663201307	0.50068713104673	0.52993093589877	0.0818949754690761	0.573725310699594	0.44394048615933	0.48128129611351	0.116514072871514	0.797863265875097
ENSMUSG00000027479.14	Mapre1	9.2448382859826	13.674904730933	56.160924606582	75.917644269401	60.266719144528	38.25062317127	TRUE	47.205773888926	30.9661882310239	3.97286277166975	0.51138686453013	0.66214785573522	0.372738298682062	0.739121457025473	0.61360269631703	0.65443123762886	0.0929367909399024	0.200348200757375	0.7107229572569	0.84115279276768	0.243080584376119	0.075071960730689
ENSMUSG00000061607.15	Mdc1	5.2952967827176	4.3668528378094	2.8564055796181	4.3846480696939	17.025102720973	11.641812538524	TRUE	4.83997242620575	1.82114165425364	2.95439507505737	0.60957571716402	0.70751259135039	0.214950390002069	0.251718874838872	0.31807454667072	0.40769761456047	0.358134588154488	0.0845427635989142	0.33258174335085	0.42723350711715	0.361315823409368	0.0062598487436827
ENSMUSG00000020647.10	Ncoa1	1.3779762405588	1.2687010099991	1.9983453347427	2.275484629073	10.118679428529	4.2091676975612	TRUE	2.13691498190785	1.20620830633801	3.32291216296119	0.61300318844207	0.68368261042567	0.15743215272403	0.600581143035528	0.3804973798028	0.37146647446839	-0.0346545082533535	0.956563351914388	0.43309741322504	0.52002166874713	0.263880184466846	0.661755937852685
ENSMUSG00000033350.7	Chst2	1.3745659430031	2.7931709978042	30.539993913667	28.48467963754	154.3039293605	181.99103080703	TRUE	29.5123367756035	40.6654471092893	8.96723683142639	0.51628506960305	0.57915575878198	0.165783522830507	0.689830826427008	0.6715516261061	0.59942508723291	-0.16391884731772	0.0177627958951912	0.80758865173388	0.81339679860428	0.0103386745945258	0.89161098117453
ENSMUSG00000033088.19	Triobp	5.8445019854309	13.868874265918	24.830665828688	20.730495299564	21.030683763459	25.35370062731	TRUE	20.8805895315115	6.24410881441237	2.06423234367053	0.54500829481411	0.59012799010295	0.11474970048517	0.677281587050801	0.79622091600811	0.78840334872656	-0.0142348660184973	0.628553560006475	0.78868620283382	0.74432464448712	-0.0835194004148239	0.0795364161941029
ENSMUSG00000039835.16	Nhsl1	1.9917847440128	1.4309101316318	3.3731142093922	5.058476558964	16.381276901792	10.97082911028	TRUE	4.2157953841781	3.71309452526711	4.54926603821553	0.54065658870064	0.61740479357577	0.191504162388853	0.481242100623462	0.39487192070536	0.42712906052032	0.113287276185253	0.2229502260326	0.43944416231942	0.4442434938322	0.0156707854923395	0.923103446090125
ENSMUSG00000029004.15	Kmt2e	3.0559797657313	2.343519499554	2.5131484431858	3.876049327321	2.4266994004805	1.5376749801732	TRUE	2.46992392183315	0.528146795317232	1.22499555317495	0.5179732144995	0.51979445876997	0.00506375914843766	0.766851171616917	0.25173275638499	0.30788669115709	0.290506548714507	0.43503656535606	0.31223077156475	0.31781105815133	0.025556596184131	0.803017778277039
ENSMUSG00000028385.14	Snx30	2.2136099195191	3.487827870775	27.138673990402	37.01860236188	3.8698896753599	2.4203233575008	TRUE	3.67885877306745	2.01914127869495	5.33780141034871	0.56341888575898	0.75121127298499	0.41501078927523	0.342508407759312	0.63423361812819	0.59516973076736	-0.091713195319745	0.472103524675853	0.54775772482496	0.65549488734326	0.259046602762741	0.133359813798296
ENSMUSG00000022533.14	Atp13a3	14.147440937016	35.141026016987	32.256984217387	50.782559550419	8.4093905132298	4.34558205529	TRUE	23.2022125772015	19.8161613989352	4.71261438024095	0.56304983065329	0.55249820472932	-0.0272928317086138	0.776783259579472	0.50390167141417	0.50455130049242	0.00185872183504322	0.98629391140239	0.74804581248349	0.75247053987482	0.0085084721101002	0.880249714278129
ENSMUSG00000057637.13	Prdm2	4.3141457955478	3.3355392925343	6.143664762473	8.7760715805663	8.0753141052745	4.8514600080978	TRUE	5.4975623852854	2.47997443662887	1.83044866838403	0.57815719200212	0.65326034372743	0.176196270830517	0.292326498307525	0.19282644381613	0.22917564199535	0.249150801627448	0.313531652101688	0.32777289696434	0.41728408669623	0.348333338729602	0.28520284420453
ENSMUSG00000038342.15	Mlxip	1.7186732962913	2.4802944446286	4.5791332221714	7.9828622401317	3.9038035380496	2.4909525190685	TRUE	3.19737802855905	1.55586918579248	2.59816298558153	0.51410065372461	0.47234367529099	-0.122213906050055	0.732190991282532	0.58663571433662	0.55653474088415	-0.0759931563803539	0.479826159093199	0.56903770975335	0.58224485785683	0.033101731065153	0.614100746495597
ENSMUSG00000030879.10	Mrpl17	26.242211757987	53.608783432973	36.609109384803	30.803693921163	42.048358212735	49.839523963719	TRUE	39.328733798769	14.1112608105468	1.33404062466878	0.41310018427933	0.58423878839286	0.500066440031762	0.400697074405255	0.71745380997409	0.68432136353886	-0.0682119664085052	0.0922139044079935	0.70142008466833	0.67876988343584	-0.0473561868449903	0.0240368493702491
ENSMUSG00000061175.11	Fnip2	5.0865927543326	7.2753814195842	14.151813582225	14.82236216374	6.8524609793805	4.4400952407578	TRUE	7.06392119948235	3.41083575959202	2.28858413402524	0.6396158619864	0.67076901879237	0.0686103388266326	0.769402967691774	0.49429123523004	0.47042496075526	-0.0713967132174559	0.444535376264996	0.54670506601003	0.4817879549637	-0.182364418606551	0.338937388630458
ENSMUSG00000005621.11	Zfp592	7.223640512605	5.3618411828019	9.5058903179202	10.665496133145	10.243362120983	8.3211755092309	TRUE	8.91353291357555	2.23851962829061	1.17008540405126	0.54843717437919	0.58999449929371	0.105375140091811	0.8454077143147	0.3498139840426	0.36126190074055	0.0464571507705524	0.783793438775749	0.38164875830294	0.45780289639692	0.262481092951475	0.0367978058240037
ENSMUSG00000004677.17	Myo9b	4.5856927516237	6.5988709001304	55.451956071574	61.139610300909	44.141622813001	48.117008835855	TRUE	46.129315824428	18.0380045106247	4.80506975159689	0.69073889312965	0.75885771072818	0.135688939988738	0.311379176859921	0.64745068075279	0.64660829185071	-0.0018782922400378	0.915404969403922	0.50012073259381	0.50523893703695	0.0146894135183334	0.77935412591853
ENSMUSG00000002489.16	Tiam1	1.7111215767087	1.5945791093228	3.8623435950533	4.5537573149934	7.629650980992	5.7213195434533	TRUE	4.20805045502335	2.97275975274777	2.93716122852046	0.66644791771105	0.63066286126903	-0.0796231567367558	0.834445467934512	0.51413844759227	0.48050099055907	-0.0976174966162826	0.728297108881905	0.48485441969887	0.42483941060003	-0.190634029696368	0.126671523727418
ENSMUSG00000062580.9	Timm17a	11.47108139004	25.333315778528	45.829824531157	47.426509913056	29.936512725321	32.997053287648	TRUE	31.4667830064845	15.1940619383239	2.10950622422402	0.50985590452217	0.47643616700409	-0.0978066356476576	0.899602110141704	0.74625393402831	0.70227247168884	-0.0876357476406174	0.0419479300203358	0.70211376435895	0.70402622547887	0.00392436015591092	0.829844543837423
ENSMUSG00000041734.15	Kirrel	5.7208130522761	10.35761542819	44.567931168803	63.748968694417	21.566814794446	23.386162029854	TRUE	22.47648841215	21.4047026872841	3.95112329827352	0.55444478287072	0.70679180642936	0.350241525756231	0.468155290292666	0.62662933426369	0.66834622235299	0.0929833455469852	0.452004780902868	0.59113371754495	0.61053980966017	0.0466008553220322	0.473964297267771
ENSMUSG00000025060.14	Slk	1.7680536855673	3.6253728010565	8.110882745006	13.390283115885	5.129012889327	2.6675431810593	TRUE	4.37719284519175	3.20151815505099	3.48365488794824	0.64090392663956	0.72703324954026	0.181913235807213	0.352235252527605	0.39612335657244	0.42457401053004	0.100066292983422	0.709057978609745	0.44186218255618	0.54311418412392	0.297659080447205	0.461518577443622
ENSMUSG00000038437.11	Mllt6	29.834187555184	24.955782845068	17.869414696889	11.671876214196	22.41249668381	22.970299290562	TRUE	22.691397987186	5.25312470824509	1.29707111626719	0.51326223619878	0.65338018386596	0.348226583787564	0.550763857699753	0.52427234642944	0.47669506773149	-0.137249752431365	0.172356509971371	0.67259306124531	0.70302794325225	0.0638481377498278	0.605600065662315
ENSMUSG00000052105.17	Mtcl1	6.5214706454163	8.0142385953479	2.6957927649141	1.945312702366	7.7984531955169	7.3219142477875	TRUE	6.9216924466019	1.4598472032361	2.59380202422514	0.544105991152	0.67670458639872	0.314638452514645	0.469038687854336	0.6445494475231	0.62557074878514	-0.0431179863305539	0.730432587094623	0.38258799728925	0.38023418921938	-0.00890335406408059	0.812122038047003
ENSMUSG00000026339.18	Ccdc93	8.9430061602234	7.121923060392	8.6746360547339	11.79415301263	8.2536315070321	5.1278618727329	TRUE	8.464133780883	1.34996890190502	1.11035921383342	0.494391008547	0.81370521957316	0.71885373971144	0.392024908745921	0.4725328799664	0.51554366185391	0.125679896908025	0.341994064489698	0.37012857456525	0.42669473936192	0.205177805449928	0.337190983347305
ENSMUSG00000023066.10	Rttn	5.6501631169254	4.181081341729	2.0646430727943	2.1713086803279	4.7027633516845	2.3715634235165	TRUE	3.27632238262275	1.717364529887	2.34656776571487	0.56448630401917	0.55765815745506	-0.0175575518268902	0.725650485978179	0.25676717434583	0.30873493190339	0.265907949248677	0.182485242743092	0.22567139620565	0.27672681478839	0.294238878789058	0.440451051298694
ENSMUSG00000023169.15	Slc38a1	14.385532066087	22.278436403513	29.893535998914	31.465301009041	28.828783538297	7.9821837613888	TRUE	25.553609970905	7.59952373113329	2.3608477241241	0.67096178595575	0.68423090814268	0.0282526738078226	0.760177793185947	0.53798161502442	0.57639933828885	0.0995118083021225	0.474811323166739	0.64600753280667	0.7006575870486	0.117158580478797	0.648733939226177
ENSMUSG00000054874.12	Pcnx3	6.6320896617785	20.888148172304	26.210951054278	27.717125115289	32.882493973751	33.406450163004	TRUE	26.9640380847835	8.89140854261266	2.12646071051107	0.55865225534244	0.69425791773315	0.313521198428021	0.374039139107709	0.76996800752422	0.73710845379667	-0.0629215979128563	0.236668509718866	0.7383992606629	0.69781058828661	-0.0815656199062458	0.231002749165255
ENSMUSG00000041936.18	Agrn	18.202420258949	30.397175361826	9.6581462790168	19.117835537685	88.410162411453	55.48926215022	TRUE	24.7575054497555	16.0524396052135	3.79254814122112	0.64326916006068	0.78801372639278	0.292798236253472	0.235957465089761	0.65665823322272	0.74678414269885	0.185548598062027	0.125235223985465	0.46326864488172	0.47408344653588	0.0332919790276486	0.893371936273957
ENSMUSG00000035572.16	Dcaf10	2.0185646047414	2.7940733588141	14.337243451544	14.802647528183	8.810385282583	5.7352279792733	TRUE	7.27280663092815	7.21505458863038	4.05708312648411	0.53235403537105	0.52966318771461	-0.00731076821097216	0.861843092087689	0.47057540142184	0.45409164003566	-0.0514424313972493	0.554886652125137	0.66243917898847	0.71373706968014	0.107604702893619	0.166187557472868
ENSMUSG00000026663.6	Atf6	4.8836199958303	5.1537655803489	20.184283008707	24.145345370278	13.514019136426	6.3248916107617	TRUE	9.91945537359385	7.2658706092686	3.72261618382178	0.67639194579701	0.80541776235645	0.251877808426991	0.30097742289435	0.50797227426418	0.56144567307387	0.144396675378698	0.386796643530625	0.41220045282666	0.48602156858837	0.237674249180105	0.489604400726053
ENSMUSG00000020576.10	Nbas	4.7459171994252	4.3151443185681	15.774918459172	18.582657405529	23.557126123669	16.461853857977	TRUE	16.1183861585745	7.34110221149192	3.1048662147066	0.7040772878783	0.80665116776639	0.196211117276946	0.313153114862803	0.39578541598312	0.46064011843076	0.218921612415901	0.314183557743351	0.27645397570665	0.30069239940778	0.12124908206482	0.522824584878825
ENSMUSG00000046556.7	Zfp319	1.5751176806909	1.1396133296116	6.2329566271158	7.6112134793099	11.70079000611	9.6219617148854	TRUE	6.92208505321285	5.54387255088052	4.33845733652863	0.55573916038016	0.51901566631219	-0.0986298174462588	0.777387252388521	0.57640031975663	0.55995806123538	-0.0417523570910118	0.354644151260294	0.40636060632017	0.41916008211546	0.044740781009652	0.859568709053284
ENSMUSG00000041530.16	Ago1	9.595892430639	9.8834820162135	9.4121963878996	11.683449880747	32.900832195219	19.117630828626	TRUE	10.7834659484803	1.89687037403416	2.10807588983452	0.57840976321075	0.55597111474213	-0.0570819740742157	0.965193328987315	0.47735813152225	0.50035489752627	0.067879714428341	0.465434788952071	0.68090365581453	0.70132304366182	0.042628452887798	0.406740313351759
ENSMUSG00000039501.14	Znfx1	4.701639715948	5.2866856414545	10.404652520349	12.456974636326	9.6247861749348	8.5139082163831	TRUE	9.06934719565895	3.50111005895922	1.77407147863032	0.55916649690501	0.72822756750069	0.381111433327917	0.399258498729118	0.53202630772523	0.57342008654797	0.108094856056708	0.520966785884268	0.46269480779043	0.48383294128426	0.0644480875748527	0.642138336200506
ENSMUSG00000040021.13	Lats1	3.0725003262626	2.4205056665818	12.054216426608	17.968513773981	7.3769700041862	4.4319111912774	TRUE	5.9044405977318	4.68195828770161	3.88109943554626	0.52111565835439	0.56216018670212	0.109377677651423	0.567320607734382	0.28410425174899	0.28849699554091	0.0221358721912363	0.887804646020699	0.51664751419028	0.5586962022161	0.112883684519739	0.925079414869381
ENSMUSG00000032384.16	Csnk1g1	4.1960080920794	3.7359698884521	12.806559741664	17.401700397267	7.3373433445637	4.118643823763	TRUE	5.76667571832155	2.72704827511848	3.23183726011255	0.52258146474426	0.61796142419947	0.241860826603868	0.607080780798346	0.34234373498438	0.36157733422395	0.0788586332240085	0.602920506178341	0.42288990506791	0.42430998822794	0.00483651819980258	0.861285642570062
ENSMUSG00000040565.8	Btaf1	8.9274160162499	7.6059981601328	10.814534639398	15.365773057275	9.419790946916	4.5623074051448	TRUE	9.17360348158295	2.37848809207929	1.61995376616702	0.55453821107137	0.68608371815056	0.307097755130383	0.106961907036499	0.34025130560204	0.36046139674407	0.0832440661378321	0.666904940094198	0.27955759225737	0.24329144740666	-0.200459921271433	0.518084973500846
ENSMUSG00000046591.10	Ticrr	13.761212416914	13.524176693851	1.4749628969008	1.8027169153018	4.6154844773775	2.909163849561	TRUE	3.76232416346925	3.14827775997372	4.70995626947396	0.47010775427538	0.72301642505931	0.621036944324855	0.429251677338834	0.33473631021531	0.31839384043221	-0.0722126284056024	0.423448073233268	0.34817261183177	0.31851739875465	-0.128430540606442	0.331161947073636
ENSMUSG00000028114.16	Mettl14	2.2569237494539	2.1309119279316	1.6110392420931	2.3565417449516	4.7348325631614	2.4851588148547	TRUE	2.30673274720275	0.262603217276094	1.27504591416927	0.49050589980794	0.70422288117477	0.521761613824936	0.205157379629552	0.46335908824926	0.47633276063405	0.039839107286951	0.814067802213732	0.35759113499268	0.27758774092406	-0.365367115505569	0.115605450583271
ENSMUSG00000060862.10	Zbtb40	1.6352074500775	2.1743696214511	4.6384933204447	6.1723044047025	8.6410676163244	9.6754765186389	TRUE	5.4053988625736	4.79376322359958	3.44329481723466	0.59878885009156	0.69440463594029	0.213729221887531	0.252963486119411	0.58070014823581	0.62560022814897	0.107447636460488	0.223185124688418	0.50009642001666	0.46712440227533	-0.0983994648671604	0.319827535388939
ENSMUSG00000038658.15	Ric1	4.5219094695923	6.4241523420394	17.252073346448	18.940975237444	16.32519841234	9.3124726172904	TRUE	12.8188355148152	7.82470138097412	2.981616048741	0.58379067918632	0.63225192069242	0.115048337673682	0.698232306388273	0.42655509082769	0.42427981589758	-0.00771603434944987	0.959619396241223	0.58639815732029	0.55734102227921	-0.0733202251935668	0.590951735786392
ENSMUSG00000015305.6	Sash1	3.5021132450352	4.0305659486818	17.314196186061	33.219111605399	28.146191489412	16.897965714947	TRUE	17.106080950504	17.8769132133433	4.21759755345376	0.56830808908169	0.81085665462431	0.512773643244106	0.359879884365476	0.5611291119965	0.55484807350495	-0.0162399713657777	0.785720721440166	0.51660613096777	0.52084095834297	0.0117781397239421	0.890181081717145
ENSMUSG00000066306.13	Numa1	4.4804647366151	6.5256017155986	28.330766322982	36.839519926756	64.465386026423	62.98293242569	TRUE	32.585143124869	40.1519361359048	5.19615507865021	0.73041930236478	0.84631841729901	0.212475671348272	0.353385706833622	0.68083967817683	0.7287808331462	0.0981698996381783	0.525515782674608	0.53136831450024	0.48961994621537	-0.118049870500341	0.331980211296834
ENSMUSG00000041313.14	Slc7a1	16.822448282073	28.086704231836	24.481191739789	40.226418894969	26.39869580467	16.949968796032	TRUE	25.4399437722295	8.2556619785615	1.45224954589574	0.66002141980204	0.70895723590879	0.103185761859864	0.53004627266293	0.56743272453035	0.63328818516606	0.158412809284735	0.202174678958957	0.61554524810493	0.65077378202929	0.080291218125313	0.039648221532415
ENSMUSG00000063952.16	Brpf3	7.9006600213476	6.6408917908185	3.0814420949662	4.8752971620331	4.4958365995154	3.7486947585718	TRUE	4.68556688077425	1.88364100790818	1.59441643873266	0.59324271908448	0.49111200455279	-0.27257040156936	0.625136706817641	0.31640297990579	0.35009378316426	0.145978255870371	0.562161889213618	0.28165221273641	0.28137067796613	-0.00144281469716769	0.73779392937888
ENSMUSG00000087370.3	Tmem170b	2.6192061036225	2.198496594076	2.1964722977405	2.9159979977098	2.4894058723611	1.3649029296787	TRUE	2.34395123321855	0.313372570300327	1.05941781688136	0.54558304607584	0.51280901619895	-0.0893771858746455	0.82175274682887	0.22199495286937	0.19574663411894	-0.181539376328612	0.37828614540041	0.51834879729203	0.61027223080141	0.235529729747103	0.579153583608043
ENSMUSG00000007080.14	Pole	8.4741870374488	9.4871077832509	8.0536739164652	7.9526288973843	22.338481051603	19.023808573188	TRUE	8.98064741034985	1.44923557467805	2.00528022676512	0.62233227900986	0.76359248993917	0.295117836070413	0.509361795724813	0.40525849359744	0.47935469073021	0.242251127157931	0.505075260242339	0.3816611828419	0.47212280859056	0.306869718701675	0.0884574945531394
ENSMUSG00000024122.16	Pdpk1	16.467049776612	18.0941976662	23.62237573924	26.532162907674	13.65397007349	8.086416105764	TRUE	17.280623721406	7.38957912002047	1.83056603684997	0.54614673703664	0.67626591144006	0.308302011490949	0.631114063679778	0.42581871790776	0.4190790627083	-0.0230169225140162	0.932714225487575	0.49323511058205	0.50452924867975	0.032662407396192	0.98386853712467
ENSMUSG00000042507.15	Elmsan1	3.4895331165438	2.8771819928409	5.3269917093481	7.364366242994	6.4325366134212	3.3795271197902	TRUE	4.40826241294595	1.89759138824023	2.00649354055807	0.60516344044694	0.62904078435516	0.0558287253124982	0.637058511423536	0.35734982916631	0.37885123708469	0.084294360231109	0.672986479365736	0.35231715807297	0.35802508620695	0.0231859414879362	0.879459600488916
ENSMUSG00000027519.10	Rab22a	7.204847631645	7.6285514360713	40.614749026067	38.821595561049	20.217614102912	18.532310514992	TRUE	19.374962308952	17.7293203903541	3.44349438446634	0.57973560716101	0.46748665763464	-0.310469908008037	0.328429873004288	0.53435308900995	0.50614819700841	-0.0782335000112774	0.0626789132706687	0.74453075617571	0.72065038836167	-0.047031917512434	0.207975236659227
ENSMUSG00000038371.15	Sbf2	2.4805832427104	2.6416707543637	10.304383639492	15.388396947825	24.504535847417	11.84233586893	TRUE	11.073359754211	9.44914812721286	4.19167822347111	0.68161023948346	0.62476004555502	-0.125644814918969	0.817168773401303	0.43866651132842	0.40028284389649	-0.132104789149789	0.458563304140622	0.5503028283619	0.58919410822706	0.0985172602786256	0.981332221839613
ENSMUSG00000025085.16	Ablim1	2.5476409367261	2.836580141026	5.8703629493675	11.438534276946	2.1180658156467	2.5050701644483	TRUE	2.69211053887605	0.564192382893208	2.64551559598098	0.46845927107636	0.76445420738237	0.706506461203926	0.38751038329721	0.40354868568125	0.42889290573207	0.0878747163813199	0.507543984992245	0.64385492470369	0.62795779856856	-0.0360680455032969	0.982489075705241
ENSMUSG00000078584.9	AU022252	8.2413512919073	12.643966586427	19.70715204076	20.08454435179	16.356868728728	15.242020466008	TRUE	15.799444597368	5.23593937729705	1.40517952212688	0.50937334142404	0.52969838940073	0.0564476653238844	0.509219676587739	0.57833518938591	0.5515043856111	-0.0685335287225992	0.0380093484754925	0.73077477586891	0.75662229979012	0.0501464599367299	0.213517518312569
ENSMUSG00000046785.8	Epm2aip1	12.607077960326	10.422049921265	8.9799612720673	14.647015529147	5.2789430849224	2.8268707145048	TRUE	9.70100559666615	5.43234638313669	2.6645269228956	0.43333338415511	0.47342913449372	0.127671104615067	0.665909837508347	0.41708162166114	0.48798053404118	0.226493856077296	0.0810814859161017	0.41995713376515	0.60814489165799	0.534173014047776	0.133129886110136
ENSMUSG00000058761.5	Rnf169	6.6299762419618	5.2293794196759	15.750637592967	18.616531743093	29.058710647912	20.499478437674	TRUE	17.18358466803	10.2814619776815	3.01099304110064	0.55872291764055	0.61753443218906	0.144386582213025	0.484439975159581	0.26596197988159	0.29176866992443	0.133604952616745	0.546363599278016	0.28356113814905	0.29758793187417	0.0696561960119844	0.850961283131404
ENSMUSG00000099083.7	Atf7	3.5529588875955	1.782550981505	2.6241575462081	4.460387505144	3.4642509166882	1.480137633438	TRUE	3.04420423144815	1.31240338078489	2.07057235342527	0.45229670386436	0.44914227535419	-0.0100969606353955	0.936035556163321	0.27530193933888	0.37342316559969	0.439796656161338	0.174929882732394	0.32042163528708	0.37395018216297	0.222874522645277	0.710838159530072
ENSMUSG00000038178.16	Slc43a2	1.3101282069495	2.1083931826994	1.7594179084533	2.789583471489	14.340682241745	16.752488078531	TRUE	2.4489883270942	1.35541555840177	4.92650533729849	0.63484325978721	0.68150954684252	0.102333426662783	0.261032941062386	0.74220499911114	0.69973713837994	-0.0850046539437034	0.111467938218068	0.62642524821841	0.60092775118118	-0.05995081408933	0.409745092845127
ENSMUSG00000013629.16	Cad	9.9939978073242	14.631476565419	20.509648819169	27.170862647194	50.279440326449	46.989532475615	TRUE	23.8402557331815	17.0906989975004	3.06361100885454	0.63779436983968	0.79812651222124	0.323526086125141	0.312959283537549	0.55125090610433	0.59821840903049	0.117963185263922	0.498025771851203	0.39320332489824	0.43124465458345	0.133231053166107	0.315827294734067
ENSMUSG00000040560.10	Wdr7	3.6106738729987	2.6910169234576	9.8414610005746	13.83147439035	11.625785495245	7.0617609852382	TRUE	8.4516109929064	5.94160224557118	3.13826840678354	0.63176127414215	0.76179327803607	0.27002005268574	0.306448528710379	0.43051314268595	0.45719762506262	0.0867606285917043	0.479606074490896	0.28684196750773	0.3261860662846	0.185439037169128	0.787476123541625
ENSMUSG00000018909.15	Arrb1	1.1050066407642	1.4470562701612	6.8251615397959	8.5419695384895	9.2357441111998	8.0944578283465	TRUE	7.4598096840712	2.11870529091072	4.06925371194303	0.43864982951923	0.78017206545765	0.830722634845885	0.372569888705291	0.73736940206734	0.72949495867121	-0.0154895433695224	0.608914283895009	0.76479098899061	0.7654968968706	0.00133100428936379	0.93082429988774
ENSMUSG00000019943.10	Atp2b1	3.7500417451338	4.4543003801396	16.558486568907	27.656831465405	16.684489287597	8.7562064412128	TRUE	12.6573465050599	9.06623903709817	3.95585128785146	0.66027556925912	0.85647822942706	0.375348309295207	0.110981539395469	0.48421493965299	0.53780959221738	0.151447894936017	0.432754481855348	0.32238687520986	0.37752650941047	0.227784941060985	0.485099731877726
ENSMUSG00000031822.20	Gse1	4.9355635465073	4.1850772286547	2.0892340172538	4.0531264144656	7.7825204201164	7.3356590175968	TRUE	4.560320387581	2.207799218594	2.07328316570902	0.56153661934077	0.554675470713	-0.0177361808885165	0.79138210217452	0.44039390617977	0.44936039647706	0.0290784747649471	0.842377174311602	0.38320932485325	0.36217174783736	-0.0814586579859896	0.437316043942514
ENSMUSG00000035666.14	Gtf3c4	4.9466630147528	8.5184112417254	22.798908920524	24.477593391769	38.764598542672	23.92025420007	TRUE	23.359581560297	11.8305417278273	3.16233538046534	0.61548045367339	0.71536473493911	0.216965959535753	0.528207471174931	0.69988255009228	0.66839331756115	-0.0664155285739877	0.194681781271575	0.67211668471702	0.73764474464034	0.134214452663728	0.340348507747911
ENSMUSG00000028556.15	Dock7	2.3567870907985	2.2916262962573	12.969234118035	20.60599258299	31.105414420814	20.419729195182	TRUE	16.6944816566085	13.5281360313616	5.2303244134953	0.62420905753694	0.73839145840003	0.242356572680537	0.165260659721848	0.3509801372274	0.39240468186087	0.160952867338755	0.555991583360529	0.24092205544181	0.23695035741583	-0.0239816353975619	0.650871927773488
ENSMUSG00000024018.18	Ccdc167	1.256002227202	2.3118136690019	2.4065666383528	1.9342598869034	6.2084157131509	4.5235686922744	TRUE	2.35919015367735	1.13279401665571	2.48771709932792	0.50194290499232	0.45552773055793	-0.139984388080864	0.987493967049581	0.66880842723677	0.5681732826685	-0.235262033060601	0.0384314353088349	0.77370072620618	0.75029139507319	-0.0443246155992461	0.308324758696407
ENSMUSG00000034940.15	Synrg	2.1161618513047	1.6675195594625	3.9510807426428	5.7333827681491	12.086752102211	7.4726469095618	TRUE	4.84223175539595	3.97076237368599	3.61473460156929	0.62160431678947	0.72855768181489	0.229046676035395	0.417249069300195	0.4234107992923	0.44465098832332	0.0706153258894329	0.488570642150091	0.36895019201606	0.40155052556398	0.122155461210893	0.917131194199374
ENSMUSG00000041417.15	Pik3r1	1.6200048151834	1.5406610641248	11.358976402847	13.746367744319	43.907637216205	22.785301509501	TRUE	12.552672073583	15.6898344394976	6.18432954386656	0.54988944151497	0.70586662863253	0.360254030849965	0.285701770571502	0.39917736988631	0.4086187574881	0.0337254980503657	0.769077581952517	0.46484035373724	0.46852055386939	0.0113770224401857	0.789991248059119
ENSMUSG00000052353.13	Cemip	1.1346931288079	2.1948919983492	31.786617820777	163.18630992052	3.7454984207529	5.7785433328273	TRUE	4.7620208767901	4.59195069716744	8.07503978118959	0.58727000751516	0.82543104052465	0.491123732451438	0.365191688058939	0.64528361353591	0.70283630131505	0.123255318245961	0.168767631344151	0.40522734020898	0.39041486513051	-0.0537235294769189	0.634971855751374
ENSMUSG00000033364.13	Usp37	7.6573245457132	5.8841785487658	4.3194558053791	5.0657260565868	7.7093812378752	4.0028451211772	TRUE	5.4749523026763	1.9478426070917	1.37773543651955	0.57825829020543	0.74785896393194	0.371052178805487	0.389003486279117	0.24276983074986	0.30618201425818	0.334800390970092	0.276975591717127	0.34148416074187	0.37493342936071	0.134815800484801	0.92326285848505
ENSMUSG00000027365.14	Trpm7	7.1422014496359	11.14205417975	12.662269977887	19.33283898086	5.4420688192362	2.3918737930759	TRUE	9.14212781469295	5.35233511890784	3.37890105569636	0.55598453278381	0.67465407849232	0.279103217181421	0.232820059287032	0.39924926486938	0.4291474903277	0.104183810236507	0.647032477867003	0.42628889375604	0.3903080260798	-0.127218338915713	0.451045227712013
ENSMUSG00000054387.13	Mdm4	23.870946015254	24.266177426606	7.7300525818063	8.5268248069246	8.1983925958505	3.8125840258375	TRUE	8.36260870138755	3.84184714343083	3.01760167444936	0.58079101469367	0.50824260360988	-0.192501818983291	0.931056506959745	0.17491890768053	0.17086459996719	-0.0338327164950303	0.990182407049342	0.37507097161922	0.38744574280321	0.0468306812942788	0.904161163053736
ENSMUSG00000029547.10	Ints1	11.138539874093	11.166901763495	24.374272285463	28.861703868866	32.485619726849	31.886838412125	TRUE	26.6179880771645	8.25547409521734	2.28861292765114	0.62464988509968	0.68574243759423	0.134619018161743	0.428310125130834	0.47995761885027	0.52898388788154	0.140316761705912	0.556029226501483	0.29159516943381	0.29418419876721	0.0127529384095163	0.831573457392357
ENSMUSG00000020349.4	Ppp2ca	20.892187957174	44.829138179604	94.254824015279	92.838480778187	139.52643809275	120.65511275505	TRUE	93.546652396733	54.1803168000778	2.90409742147364	0.5245402642119	0.63613186359248	0.278272332649852	0.712688902123432	0.76338673492752	0.75665564766542	-0.0127772354231994	0.796920230147476	0.82847644338579	0.85617361789744	0.0474427041321187	0.221930110235012
ENSMUSG00000042446.16	Zmym4	7.4739602555166	5.7726123314909	6.6220114599285	8.9915308206853	11.060953325842	5.368285068168	TRUE	7.04798585772255	2.19059659029231	1.2870969210441	0.57884587440353	0.77807025642509	0.426721168155353	0.129199905382616	0.21454201013683	0.22727520698562	0.0831801379371106	0.757885282345539	0.22891424782007	0.23503402132408	0.0380623426598725	0.835924028818582
ENSMUSG00000038369.14	Ncoa6	4.8236669638722	4.4002173380844	2.7099070198601	4.6373113019352	3.2556214729218	2.1786164999507	TRUE	3.8279194055031	1.33814987784413	1.63333553920999	0.51052915288886	0.59301589884851	0.216077438094947	0.570365256109491	0.28970325335663	0.34535937572757	0.25352250398508	0.479064095572055	0.25473008809125	0.28463799764635	0.160158889506742	0.900600831202204
ENSMUSG00000032913.13	Lrig2	4.6355907363428	4.7118979397728	5.4328025717612	9.2202850472137	3.661026372494	2.1878438396112	TRUE	4.6737443380578	1.31341769651677	1.84952817737589	0.68629377174198	0.79039714494542	0.20375147367699	0.476324982963741	0.38857531145195	0.4699999111636	0.27446624343874	0.098420316227557	0.34108964107039	0.33643151615647	-0.0198380804232047	0.827980153477767
ENSMUSG00000038127.14	Ccdc50	4.3668753730259	3.3643053463129	16.763293252174	22.09944695541	8.8864826493211	4.8433356152706	TRUE	6.86490913229585	4.44679001229597	3.83440257019697	0.56981566553633	0.48208218201812	-0.241216177155213	0.658036010613125	0.28536390243461	0.28343744257921	-0.00977249695812109	0.934645484194984	0.63828822895629	0.6365106523124	-0.00402338393720802	0.928734334435554
ENSMUSG00000038648.5	Creb3l2	1.8095393180036	1.5260908730646	11.718904278057	19.092814489329	13.467019351771	8.8414564924592	TRUE	10.2801803852581	8.64168994903177	4.81552563506639	0.57827470408945	0.58168668497306	0.0084872861175107	0.86198238073397	0.4523790008995	0.4927064554441	0.123196411937116	0.330873078154992	0.33938312302596	0.3391757247506	-0.000881905743764558	0.695032329142565
ENSMUSG00000038733.14	Wdr26	7.4390296599937	13.787650816452	34.121209401125	44.215814348326	24.019190340546	12.349783836844	TRUE	18.903420578499	13.3567639044768	3.35370249037255	0.48868009680223	0.61440617985945	0.330302380135021	0.63236820964213	0.56797867734677	0.51898031528096	-0.130156951345159	0.194014416777196	0.71411908166835	0.67098790939762	-0.0898778977981312	0.442325926844724
ENSMUSG00000026374.14	Tsn	10.852842555579	24.880647813919	43.678187834493	40.7869108052	52.021724399541	39.218301027993	TRUE	40.0026059165965	11.6344814071434	2.16921062962103	0.50959348860621	0.65167567832746	0.354807308566959	0.525820023093493	0.66693898222999	0.66271157501817	-0.00917365835204355	0.865545868569515	0.82221828109055	0.85139163982692	0.0503014748132373	0.354954454931591
ENSMUSG00000021277.16	Traf3	5.9796299436961	3.9211903521732	16.820626048695	16.781535642063	26.773105821015	23.76183869735	TRUE	16.801080845379	12.5522719101051	3.30305145585263	0.54313583846241	0.51860655398915	-0.0666726230499847	0.5281225263001	0.19834893963436	0.21573217107488	0.121200649626108	0.540843501056333	0.46234509853674	0.59667796813915	0.367982413238367	0.119145631762144
ENSMUSG00000062202.14	Btbd9	1.6513087891815	1.7494234543807	5.7698588013945	6.2493920638538	11.009517330079	11.557235302773	TRUE	6.00962543262415	6.38890785425591	3.8650539066307	0.59427968623956	0.70172005320635	0.239753523844444	0.343109005491638	0.70075835859683	0.68527371500696	-0.0322366970124003	0.753040545405619	0.5749991872238	0.61046538737652	0.0863495817564673	0.458895612177829
ENSMUSG00000046324.12	Ermp1	4.061024103711	6.6298443870172	7.8161124222687	6.6904582315135	21.749193549127	8.3430416765897	TRUE	7.2532853268911	1.26999315076009	2.06349295242091	0.74990636795414	0.853191540273	0.186159186484631	0.392191025308238	0.64539138474913	0.68898352410348	0.0942951640933223	0.221278428440416	0.61535461369278	0.67759102371584	0.138996723231148	0.6404104794567
ENSMUSG00000032386.15	Trip4	2.0108187895094	1.7715630513246	6.256702165441	6.8566244002522	7.9034768202314	4.3293057121443	TRUE	5.29300393879265	3.09425539509051	3.09035983347111	0.53005778246116	0.61843224376204	0.222465901539794	0.517143836937679	0.37613528479737	0.39803784823471	0.0816539686622947	0.584978303424285	0.45689480771375	0.5241415221801	0.198094355516318	0.587263306437688
ENSMUSG00000027087.11	Itgav	5.6707147600357	7.1386137106552	97.145466760425	193.94130918868	40.586347704462	21.896649710307	TRUE	31.2414987073845	36.8230907882451	6.76002942947277	0.62764964859311	0.85645790007886	0.44842285368362	0.248434438111456	0.55813225513449	0.62619561283396	0.166006377019768	0.129537889770188	0.48590175015788	0.55950219605468	0.203479164939609	0.172541916532612
ENSMUSG00000058997.8	Vwa8	2.6129397608866	2.7047984802962	4.3947308045265	6.4735939456126	9.2462603612867	6.3020048849537	TRUE	5.3483678447401	2.79380807843905	2.49690881366185	0.64432742662606	0.58806793741171	-0.131811172085197	0.140307805274221	0.45070015634218	0.4869199469626	0.111516652164236	0.436529911298505	0.38485874016389	0.32833133964621	-0.22917654779287	0.0403244285242172
ENSMUSG00000000804.14	Usp32	2.93109473915	2.9406012940374	7.1063989652399	12.946157494216	3.5436560396457	1.6429150590955	TRUE	3.24212866684155	1.41606649801989	3.13649143451223	0.54313349090009	0.6491682335089	0.257285578562652	0.306198928936385	0.36138414939418	0.34860137675241	-0.0519549626026585	0.951530091879481	0.43339715107484	0.41337477544346	-0.0682393132385606	0.490753493046084
ENSMUSG00000039318.12	Rab3gap2	2.8006393802785	2.5343272534602	32.16793802217	41.859540906357	20.57938718072	17.034112433331	TRUE	18.8067498070255	21.7699784832342	5.4345860380371	0.67245504620178	0.73349306032499	0.125345490087734	0.504648525325544	0.46610451408616	0.51394623931844	0.140963971038101	0.371496445505866	0.38590224909878	0.4351895823076	0.173408569199611	0.160036161829608
ENSMUSG00000024054.14	Smchd1	3.2456007771452	2.5343272534602	7.2631696502711	10.706388090477	12.950928698224	6.3471470100271	TRUE	6.8051583301491	5.53068163537286	2.95959029224063	0.56667235148695	0.67309726131131	0.248300173043009	0.133216904778908	0.2580075879535	0.31966289685867	0.30913780515818	0.30915267507764	0.18230719610975	0.21137650939972	0.213443547491213	0.742258936187462
ENSMUSG00000030516.14	Tjp1	1.7020470579536	1.7816365387325	14.001547814862	19.116240164495	29.566622192089	12.773431190955	TRUE	13.3874895029085	12.8501416677777	5.31962087273495	0.65090824137223	0.78463326118812	0.269564312829599	0.32310800358331	0.28953728153319	0.35356938627337	0.288244239567259	0.512371829205576	0.32951897398005	0.38726732767543	0.232968252388538	0.870406016970687
ENSMUSG00000050812.18	Ecpas	2.3804759346192	2.3525812847619	11.647632582978	18.197424222699	11.541397627569	5.2164284458499	TRUE	8.37891303670945	6.86974322342838	4.42769682421591	0.63216325090433	0.69272204702992	0.131979420212681	0.552393200079669	0.34049409830819	0.37760994120766	0.149266953925809	0.564906485327688	0.30671724639374	0.25977188490623	-0.239663993689836	0.554662720961107
ENSMUSG00000027035.10	Cers6	6.6914443303902	7.0647634915377	23.983189236252	30.600470867646	2.6811000365239	1.1511883760405	TRUE	6.87810391096395	7.35660145816116	5.52563637685387	0.54804981786364	0.73853628540885	0.430361764047191	0.313245392776023	0.50907908287824	0.53602923669517	0.0744219027482405	0.48168909737788	0.50478923053976	0.53941996127334	0.0957277782189623	0.790320536948031
ENSMUSG00000021339.4	Mrs2	2.271413483658	2.952416523676	13.763396367694	15.729154221552	20.991469795556	10.990931770451	TRUE	12.3771640690725	8.87061513507527	4.12154787158664	0.63755168935016	0.47074876183306	-0.437585012610224	0.226600384418605	0.50757174969954	0.48577121683584	-0.0633347650536377	0.0969997677414022	0.7468359754533	0.72643209253636	-0.0399634847080179	0.669863922063057
ENSMUSG00000044864.16	Ankrd50	1.0913487822534	1.3954669456609	66.078742230486	79.530032217017	18.457165059328	15.650006887166	TRUE	17.053585973247	23.4401700648331	8.31131966366524	0.65474407998201	0.73109604705594	0.159129841155028	0.386302547150849	0.55409537248718	0.5598225341474	0.014835241418038	0.863174908871557	0.54434742854572	0.56648345988583	0.0575060906519145	0.580969490954581
ENSMUSG00000054455.4	Vapb	10.076278027177	11.06383285622	65.090453553282	61.880363456266	37.725191203512	36.846048779016	TRUE	37.285619991264	37.6702941338141	3.61069504108828	0.55792718873991	0.43466402605162	-0.360176158793525	0.139051910757928	0.5733162830365	0.56000030527823	-0.033903640666369	0.508754127778703	0.75070497403313	0.73060308171581	-0.0391582029969789	0.385416644387771
ENSMUSG00000046574.8	Prr12	4.7646020231522	3.4260125047014	1.9174236829809	3.3216037316063	3.7256770294565	2.5859109242678	TRUE	3.37380811815385	0.844908613776383	1.30635164523065	0.44582905905694	0.6281462791268	0.494609910581143	0.300931133780893	0.36138059691316	0.40230880792381	0.15478427612763	0.63358196436598	0.335412669693	0.33743825285885	0.00868634497911011	0.846407328442081
ENSMUSG00000032525.15	Nktr	4.3897659264793	4.4540205974013	9.4726107973622	11.664692400839	7.8655110065678	4.4018994170714	TRUE	6.15976580198455	2.61520725884816	2.31233937019776	0.53620383652765	0.65571087343938	0.290278276989886	0.123416039142524	0.098510348691382	0.11341733329246	0.203293945287116	0.575473291783573	0.18871635316317	0.2030106310304	0.105335834112376	0.999168248908125
ENSMUSG00000003316.14	Glg1	4.9650103625145	5.8994079503292	38.237713704922	77.840952954355	66.84758620985	34.523470951921	TRUE	36.3805923284215	45.1808845437828	5.28199838070768	0.79824473442249	0.89406543926325	0.163549299172642	0.22610276003413	0.64774578169382	0.71610523503551	0.144743898704746	0.191285633653542	0.45077076376736	0.52351252309955	0.215830100934609	0.63588045917243
ENSMUSG00000039115.13	Itga9	1.5813669605046	2.5028750169871	12.888739102296	6.5654184943393	3.5185755149655	2.6392789641924	TRUE	3.07892723957895	1.53716894748515	3.34999099276529	0.54765722337625	0.79208811771539	0.532387737072884	0.411844038289403	0.54876657144052	0.64934583322378	0.242794442443643	0.0591314360873065	0.5462084555835	0.53091876695327	-0.0409605090789031	0.638003878833115
ENSMUSG00000038485.5	Socs7	5.3789763590352	5.5859919808034	11.94681963022	12.163326260865	16.682333494747	15.97771129587	TRUE	12.0550729455425	6.33804005422307	2.20074514888599	0.5429007921122	0.63878858488884	0.23464994329758	0.521258058564713	0.42451377587223	0.4237534247331	-0.00258634333794843	0.95822139385768	0.64020925155654	0.68607288137799	0.099818316551624	0.107231407813003
ENSMUSG00000038013.14	Wipf2	4.4530688755765	2.902239310091	2.2572642121072	3.0014799163534	4.1416185875039	2.3679342910095	TRUE	2.9518596132222	0.947767412202824	1.27213150332152	0.49818695493738	0.50563820638579	0.0214182337105153	0.920018206810668	0.30525970266731	0.3895808165061	0.351885486941086	0.132573276346429	0.43972728271604	0.47764505394536	0.119329878653491	0.504906826181571
ENSMUSG00000029249.15	Rest	27.848201867716	23.883353325164	19.47601847725	26.171586702637	10.282818135919	6.5521576617403	TRUE	21.679685901207	7.90256695007318	2.58517179072008	0.59253616837017	0.8328449914822	0.491144788487457	0.34091867278707	0.39157572133254	0.40081164164026	0.0336330954190128	0.818988931027841	0.36946454429058	0.41620839777718	0.17187015180692	0.877815414673099
ENSMUSG00000021244.15	Ylpm1	2.2592006336088	1.6122811135923	1.5801471768708	3.1117114207333	3.627533107698	1.9078626014621	TRUE	2.08353161753545	0.722496884437762	1.65758518405678	0.54643408967136	0.57471681711574	0.0728037753405427	0.606954113296899	0.1281449996652	0.18718806513684	0.546711269077122	0.259976189741087	0.14117430064724	0.19657681703969	0.477615705389411	0.349750224996521
ENSMUSG00000079509.10	Zfx	10.295894432448	7.3899585413969	11.428652174392	18.144619066432	6.4526584977448	6.1741487337148	TRUE	8.84292648692245	3.68870411249857	1.98125745736757	0.47575773521276	0.50931978456485	0.098344646852336	0.80737626988885	0.25551723172962	0.25750110943489	0.0111580603053644	0.85133443230265	0.16001658402109	0.13271867233659	-0.269850073548185	0.339934544138139
ENSMUSG00000004221.16	Ikbkg	4.8032089208237	4.2387631548944	23.104489320403	39.773063740238	13.950668507788	11.584306249032	TRUE	12.76748737841	12.2262628875008	3.99553725286568	0.53022850775819	0.57465654333418	0.116085714991815	0.567972294919159	0.77396351065566	0.78071737058091	0.0125348187329918	0.656971894626865	0.64908872339652	0.65172195203964	0.00584089778134748	0.866184375317946
ENSMUSG00000024085.13	Man2a1	4.3903723576162	5.6699432847324	46.607064846571	72.701349527479	4.3839823410222	2.9738522993657	TRUE	5.0301578211743	2.00334916675347	5.81606145070059	0.67388577751523	0.8113865063995	0.267885232502165	0.21924559557397	0.58180047235233	0.58039772834189	-0.00348259498079914	0.926828752702427	0.2969456335615	0.32160321664995	0.115083017644508	0.96605823084108
ENSMUSG00000025786.16	Zdhhc3	51.3371354543	42.218379635003	96.656286718295	85.041835638536	72.029052493223	62.512905807347	TRUE	67.270979150285	24.9852942465741	1.47473104440488	0.58002160195043	0.44791619502781	-0.372877802278711	0.111564486646081	0.21049697868178	0.215042364164	0.0308213781661196	0.356920217444695	0.43888497600299	0.43660892148222	-0.00750127437105145	0.764852416265497
ENSMUSG00000039976.4	Tbc1d16	1.3588189553818	2.5496274201218	18.798262361821	17.037422736738	19.742040145632	23.89537473682	TRUE	17.9178425492795	5.78342228879988	5.01222432390817	0.62583025062798	0.6126351320671	-0.0307432936708987	0.543522684469873	0.78901622589616	0.71855400018357	-0.134958388163817	0.0402945607877435	0.81542449994906	0.82546791741436	0.0176608403607306	0.984384787595348
ENSMUSG00000042548.14	Asxl1	12.789600911481	10.011211768113	16.066892575926	18.943384794164	18.652318640737	14.890561112209	TRUE	15.4787268440675	4.34603265269747	1.09112045499178	0.52439867877834	0.68996063211251	0.395849996011361	0.367185235920654	0.35913471857815	0.40588826022045	0.176557483407364	0.376435479698208	0.39152750040828	0.42300547287857	0.111562684975687	0.112956732427165
ENSMUSG00000017418.13	Arl5b	6.8858365214503	6.0715945237283	8.1587412427623	10.137693391068	3.1017244544339	1.7956264870605	TRUE	6.4787155225893	3.74876654518784	2.82388354641212	0.5728056002758	0.6034994732296	0.0753069139220907	0.83275514005711	0.36594354302402	0.33363829786356	-0.13333618662481	0.275934854553106	0.49556070499819	0.58129626091241	0.230211833793088	0.450937420604681
ENSMUSG00000021754.17	Map3k1	2.5242547054611	2.431412478496	2.5536178607959	2.4507785876163	11.274303939977	6.1340435475385	TRUE	2.5389362831285	0.145058696057266	2.46306746302313	0.62778835051683	0.74787320240932	0.252515432255616	0.443204476940374	0.37175929411534	0.42007900152457	0.176291861055898	0.477845017768982	0.40391148208239	0.43819369017432	0.117529551767494	0.705050398297312
ENSMUSG00000067851.11	Arfgef1	3.1742125038732	2.5568768234718	5.1130658993561	9.4352078721824	2.3640346808964	1.3494895804585	TRUE	2.8655446636725	1.49562098341846	2.93242426137416	0.53599439206042	0.59932933836688	0.161131092136958	0.385875873833977	0.23482147115043	0.29115063075219	0.310201415416428	0.36360657039071	0.32971634004208	0.26633115991858	-0.308004156421896	0.360826426044818
ENSMUSG00000033991.9	Ttc37	7.3103416618577	4.8209431447446	6.4500252818839	9.4002424051239	3.1585501904723	2.2965430945236	TRUE	5.63548421331425	3.077723017738	2.5396218449805	0.45986640940418	0.70799329309197	0.622520872551686	0.0798209735848157	0.3165811313437	0.33845874034237	0.0964047019463006	0.585114806607486	0.25860206481991	0.27152287080795	0.0703399292125385	0.957002170280065
ENSMUSG00000021945.9	Zmym2	6.21216950747	3.9998464449167	7.6769145768254	11.339178250544	6.3651274423988	3.7351447422329	TRUE	6.2886484749344	2.72581060618392	1.78676306940289	0.54161495517244	0.63761297122022	0.235413403533871	0.200996944528451	0.23465004240152	0.31483461370874	0.424083442021328	0.166787261608264	0.33597206888219	0.31192914629402	-0.107122936449181	0.676739287218773
ENSMUSG00000025234.11	Arih1	12.255685411085	9.8436835504462	24.814808898299	36.682601010754	11.30664120778	6.8156254512901	TRUE	11.7811633094325	5.11720695957751	2.68829501543565	0.54692344353411	0.63622581753655	0.218200012828561	0.585761449497398	0.3790073738665	0.38208684867671	0.0116746840272777	0.854873150048325	0.44482243007919	0.49873942989588	0.165056728203941	0.507562505588636
ENSMUSG00000062232.14	Rapgef2	1.6849574015262	1.7470268290821	10.439472436233	15.758894879209	17.50714654501	12.586898056621	TRUE	11.513185246427	7.59066806142087	4.72742084883161	0.66620330991243	0.80323085124384	0.269852160933734	0.435171932170849	0.41599826926487	0.42712906052032	0.0380945316254645	0.758702944925367	0.5063086049378	0.51296683437591	0.0188485483993284	0.984855987297752
ENSMUSG00000064127.13	Med14	2.302474670543	2.7921758274583	9.8216415509563	11.560311586815	11.071357296757	6.9068831980202	TRUE	8.36426237448825	4.37600074697564	3.34320331287199	0.5771033797677	0.52136509201343	-0.146535789584705	0.785188434269777	0.47849718890225	0.50461298955185	0.076666894964726	0.528969598148361	0.46952067045802	0.51409011804313	0.13083260719933	0.850841854957103
ENSMUSG00000039145.16	Camk1d	2.7307938927497	2.7882405873853	1.3673969294619	1.405322572527	1.8391782897158	1.0759246305769	TRUE	1.6222504311214	0.593914216723825	1.91296588365642	0.55583386389493	0.70886041600005	0.350847837002688	0.34557814534326	0.46173292981639	0.42828532867418	-0.108486368847333	0.629596909642157	0.49098460647058	0.57565563822822	0.229528244731631	0.0263394901707807
ENSMUSG00000029414.11	Kntc1	5.4699484895997	5.4775330617445	3.261184181211	3.8274405686497	8.3637808935873	4.8577289385191	TRUE	5.1638387140594	1.22321356513118	1.41897688448636	0.62281357175391	0.78112291044359	0.326749193104559	0.259125804902869	0.3495407133483	0.41176871704019	0.236373723728337	0.479671760879327	0.35118826912827	0.30394804130169	-0.208419932985234	0.492016507432701
ENSMUSG00000032777.9	Gtf3c1	7.2882139155055	8.4613357113726	47.684590922044	61.282608740679	94.804950712766	102.28022946772	TRUE	54.4835998313615	64.0065218005329	5.30866025774159	0.63901243224579	0.79971247162264	0.3236373874299	0.361476608885965	0.531178611176	0.5918852253968	0.156120389518344	0.29929316379433	0.3897125968364	0.35972592847688	-0.115512414668962	0.188204243128264
ENSMUSG00000034163.10	Zfc3h1	2.6266300492917	2.4995036245448	3.081778164694	5.0064277542965	2.6870459246108	1.6743750989004	TRUE	2.65683798695125	0.431640116612602	1.32743795832926	0.47395525503629	0.60223378318474	0.345572776200739	0.103523247184807	0.17452271275034	0.23378418760962	0.421762550042093	0.325661395494192	0.21626053455589	0.22744978316601	0.0727776477631513	0.902667428580283
ENSMUSG00000029406.15	Pitpnm2	1.5475264363162	1.3635566176027	9.263687864817	13.701250218049	7.7002565994324	7.5335102553635	TRUE	7.61688342739795	5.71999046694764	4.11872760788167	0.505514736004	0.5553295280648	0.135590961152247	0.916002678606076	0.42701791899295	0.42827988898286	0.00425732218745066	0.91694328310986	0.42454077250417	0.39758779650937	-0.0946296397837166	0.229298869021025
ENSMUSG00000033904.16	Ccp110	3.4042410975184	7.2822820455791	1.6453536994221	2.0540431872459	3.1375419376345	1.6677432227692	TRUE	2.5957925624402	1.28726587455158	2.62466912568181	0.46933673228239	0.65500133508475	0.480874471073559	0.337842236975454	0.31450097425402	0.31593811821767	0.00657752377860097	0.923080632601475	0.50402277985676	0.43458031352464	-0.213866117410748	0.408910807202933
ENSMUSG00000020715.9	Ern1	2.6118085328649	3.7421540630998	6.372456481213	8.4891914790586	4.5811178054043	2.6850034021206	TRUE	4.16163593425205	2.24351474871734	2.24533552317675	0.59708748630514	0.61897054105416	0.0519284150494326	0.811656066259295	0.54891322752884	0.61852384487784	0.17225110867754	0.148487594122718	0.58450276221832	0.61175169404634	0.0657363487825371	0.505821086929996
ENSMUSG00000031398.13	Plxna3	1.2381068088038	1.4522874765776	5.2560324722027	7.2088859451857	14.057363695337	12.695425504293	TRUE	6.2324592086942	7.24585473905679	4.91360273256658	0.62047362288045	0.76587299323424	0.303735285144439	0.12071637391467	0.60284053768674	0.71844935037941	0.25311001894554	0.0682894509145659	0.43066656740186	0.45205335294417	0.0699217230183794	0.957577277950926
ENSMUSG00000024169.16	Ift140	2.020759829965	2.213535359052	3.5103868169752	4.0679581475127	20.145740652881	19.475289097217	TRUE	3.78917248224395	2.47894409855658	4.62148973300486	0.63962248186356	0.72906962278442	0.188835943364133	0.230148444558866	0.59026673765765	0.60429485283743	0.0338856075145485	0.816765926798002	0.44173896855129	0.42093098768189	-0.0696103866376465	0.234463635621972
ENSMUSG00000033902.12	Mapkbp1	1.348439360221	1.9395614344542	7.800208436384	11.668080384455	12.945105087448	14.022912818982	TRUE	9.7341444104195	5.55954917114861	4.64270706115637	0.59193110267376	0.7093764556573	0.261122183396537	0.466568015523917	0.52811737198	0.51723979789695	-0.0300253139718195	0.742704103941534	0.46072733982246	0.46733791072292	0.0205528633831922	0.882614043376653
ENSMUSG00000040363.15	Bcor	2.1654117469103	1.8006594621949	8.9794447534617	14.879164238608	6.8386343574702	5.166848790937	TRUE	6.0027415742036	5.05124266775655	3.81446148947805	0.61647030123218	0.76417302408345	0.309867936569328	0.309762499743875	0.31944939586626	0.36920443159546	0.20883245864106	0.21791888311058	0.26546208712086	0.27688478878002	0.0607799662453362	0.995926934208886
ENSMUSG00000079487.11	Med12	1.9719484815771	1.631267140591	7.23383254506	9.2101578706764	13.012165477796	10.154563121782	TRUE	8.2219952078682	4.98356581568178	3.95696667481077	0.6856211641494	0.77966112429434	0.185435556135367	0.353596467366309	0.32673203108758	0.43249775818125	0.404584758737386	0.186741270688264	0.3688958986896	0.41282684002504	0.162323021407539	0.259348727509233
ENSMUSG00000009112.4	Bcl2l13	9.8925224867744	11.138441225249	16.331940162116	16.355563972573	47.270213409292	28.017544753068	TRUE	16.3437520673445	8.64099341532201	2.48797523955262	0.66735545138796	0.46131917286327	-0.532690130716048	0.30541741578764	0.52792274625029	0.52977568394326	0.00505479951398743	0.829681108102578	0.67276019707653	0.70833362754293	0.0743366815787734	0.156369800278757
ENSMUSG00000022255.16	Mtdh	13.620683287763	22.108580767371	45.974884240326	57.68122754295	27.966630707412	14.825145970691	TRUE	25.0376057373915	16.0338610369647	2.81015900461539	0.61356214876232	0.72244697138816	0.235682211333694	0.547577673027388	0.42222600425913	0.42499377398774	0.00942627159970354	0.922552477900096	0.5124314407475	0.56492887325713	0.140710241639914	0.818691426431852
ENSMUSG00000045005.9	Fzd5	29.857762195946	46.718132107	11.984270593764	15.239131611241	8.3219616999807	3.5813157998684	TRUE	13.6117011025025	11.3568084439321	4.08622048183534	0.55391170776218	0.69324619886606	0.32371176848777	0.518853838375859	0.5666427640052	0.55694430211006	-0.0249064283717045	0.7305337625726	0.63576398757871	0.74506124090639	0.228867715619829	0.0884876992716417
ENSMUSG00000045374.18	Wdr81	1.1718545853621	1.761189177436	17.526425852469	27.249297958342	7.1639696018942	8.4312590931166	TRUE	7.7976143475054	9.38647769024927	5.60704256748599	0.58955822472945	0.70989334495217	0.267967988326685	0.462532974348635	0.61287830441723	0.6538819526796	0.0934295700374234	0.465416043629227	0.47309134685376	0.46555264981714	-0.0231744404241008	0.59112470690398
ENSMUSG00000033565.18	Rbfox2	11.636253764121	14.57671534859	69.827238035886	68.841364357251	21.83439315045	19.166738809236	TRUE	20.500565979843	10.9624651184626	3.47458795933813	0.55038815597982	0.60974997077415	0.147768359422349	0.83804411876464	0.58072892573009	0.60812592813122	0.0665052062269928	0.18773291166751	0.5776721119374	0.5820634820594	0.0109256596233621	0.525331010671503
ENSMUSG00000031731.16	Ap1g1	6.7574648117367	5.2379493704305	16.959595846481	23.733596429251	17.574410044145	9.3019944899929	TRUE	13.130795168237	8.01860150078427	3.06736257415845	0.62185041729954	0.62423230959534	0.00551544181492306	0.824868784885237	0.42216440741604	0.49973458439074	0.243357113460714	0.178544718979395	0.38286831776975	0.46208602221555	0.271313167055214	0.432500700202596
ENSMUSG00000024393.14	Prrc2a	18.934273702043	25.433886149802	25.692648796914	37.271361867851	57.001734848196	56.087523315187	TRUE	31.4820053323825	13.7851042076176	2.26495934328516	0.50481324787585	0.62017202182276	0.296918670647361	0.284848509296317	0.58746817529411	0.54055942119088	-0.120057483731929	0.383933921789716	0.5306316250678	0.49838573691593	-0.0904478800920316	0.21568750836965
ENSMUSG00000028082.13	Sh3d19	2.963886846927	2.0342496642252	9.0452574866887	11.912686248427	26.011403801298	12.010194353048	TRUE	10.4789718675578	6.7060277542875	4.22302561955358	0.5947989634248	0.70390204438748	0.242972542989155	0.36897878819574	0.24104033204287	0.27697735592532	0.200493469233812	0.536826164395874	0.43764759638615	0.46447361782934	0.085827006607937	0.835927462505068
ENSMUSG00000039286.12	Fndc3b	3.4540386769098	2.6743368430547	42.620827896128	74.220908432473	11.765341323506	6.4202369813338	TRUE	9.0927891524199	8.93800442442806	6.44184633250499	0.55327919663706	0.7080296767118	0.355802152123663	0.492187387315345	0.37253235672326	0.39222004346115	0.0742975249288184	0.608517016475795	0.35061543871572	0.3772509384089	0.105634965490715	0.926834978684467
ENSMUSG00000032198.9	Dock6	9.3708309304413	9.6579487195735	2.820607800841	3.7961097050119	3.4751866420259	3.3906728127506	TRUE	3.6356481735189	0.785789663203668	2.33573087750419	0.50439571552335	0.62242135203521	0.303335531459099	0.297262526194942	0.44038165962438	0.45552363776493	0.0487715325669554	0.820834608324793	0.4076919697271	0.4256949891571	0.0623405678307995	0.78778616695527
ENSMUSG00000048379.9	Socs4	7.4347515801603	3.959686509832	4.6439057212804	7.1046437422825	3.3361007008405	1.7649860074228	TRUE	4.3017961155562	2.59640734408804	2.35335925739572	0.46700300546453	0.44640501994169	-0.0650785838918129	0.91857746731962	0.35598389872418	0.36408750995092	0.0324732608029609	0.917694036173946	0.55847163804557	0.62595943887934	0.164585160597304	0.584676994715317
ENSMUSG00000039202.12	Abhd2	21.069602853523	22.427980464226	45.149412057085	50.784828272823	66.214994880923	40.030060480693	TRUE	42.589736268889	21.020931280513	2.08271048795104	0.62329026019822	0.6781431940136	0.12168577051116	0.740720565001871	0.57109802637	0.61302176638393	0.102199901311888	0.389400313481113	0.51466713294093	0.56193361886963	0.126760061357578	0.482271277837188
ENSMUSG00000003131.7	Pafah1b2	12.553205205295	13.322304541498	93.447142761991	95.746453087874	44.00417919271	32.962614270302	TRUE	38.483396731506	37.8739686188331	4.26859444341819	0.57479364677648	0.52388347268255	-0.133798166683647	0.602412579659261	0.63489243494024	0.61920217999202	-0.0361016368854921	0.331536589608616	0.73263966092117	0.77617946094315	0.0832864549925425	0.325742846571453
ENSMUSG00000034621.14	Gpatch8	3.7647551492883	2.3067081266166	7.6972601618023	9.5468353363615	14.213197107151	8.3654187417594	TRUE	8.03133945178085	4.28625604267736	2.83211829699549	0.60464431579501	0.75171896330333	0.314106677233567	0.425686561244739	0.20657845918563	0.30205219886764	0.548108062987887	0.190927694665241	0.29978140619688	0.37983084494853	0.341446163708385	0.215411640761749
ENSMUSG00000055067.15	Smyd3	4.5898543919968	5.0483954999666	3.8900768663878	3.5716049609685	3.9786717374654	3.4396110039256	TRUE	3.9343743019266	0.635688945260381	0.657064434172517	0.5544648704671	0.61179768756613	0.141958596233023	0.733626273780568	0.68115100351917	0.69272490623956	0.0243078824764986	0.794420224508973	0.50156945614309	0.47359296084133	-0.0828018577392054	0.521488197770294
ENSMUSG00000026383.14	Epb41l5	3.1243188205362	2.4081143863075	1.7054873896162	2.0155729151491	11.477131943624	7.0671375680039	TRUE	2.76621660342185	1.34277073231072	3.42142990079686	0.55447723671136	0.61281949961782	0.144333970073847	0.834724009722355	0.42772083215724	0.39559802624766	-0.112634247340573	0.661672098185597	0.28870326278361	0.28860506330592	-0.000490801516088487	0.801146777738994
ENSMUSG00000074221.12	Zfp568	14.971794758239	21.629742347285	14.645162028133	21.274319961429	6.2509639027923	4.0426727344286	TRUE	14.808478393186	9.84973132371212	2.92398635798502	0.57578831936731	0.80229654903517	0.478597069514576	0.385770720004624	0.40481443156539	0.40168268305113	-0.0112044561070142	0.99208630890143	0.46223023983991	0.54557760874206	0.239172789076901	0.241284769774932
ENSMUSG00000021375.10	Kif13a	4.212990750259	5.3202845660352	11.625401634561	15.789510892964	27.171115243641	19.178774681915	TRUE	13.7074562637625	10.2732987229017	3.4524124243949	0.62308562187707	0.64000109153419	0.0386439395367444	0.87792999213257	0.63331581012521	0.59713438881536	-0.0848694398201658	0.507539836246357	0.68919102586121	0.68682102902602	-0.00496970364462567	0.833526911519771
ENSMUSG00000095115.2	Itpripl2	1.3904510554632	1.688666833305	186.21723151638	241.75339665365	2.08283896709	2.3603973169913	TRUE	2.22161814204065	1.0112209664456	9.98636264009369	0.59051746874016	0.57340254230626	-0.0424314370880909	0.784935357900717	0.51296978535161	0.47528970228781	-0.110066707260825	0.289589432374682	0.68513615249956	0.73646002730443	0.104216508866123	0.395232598727766
ENSMUSG00000026594.14	Ralgps2	5.870796578946	6.7698323173831	1.1974299940026	1.2105772338984	20.334944729672	11.618321030087	TRUE	6.32031444816455	7.58544244280575	5.23613517565463	0.59119896923294	0.5621114017472	-0.0727876755923776	0.912490528210032	0.39005877094284	0.38736504760197	-0.00999773036322962	0.730933895852304	0.53361572259267	0.5735702742944	0.104169082143594	0.467625558916813
ENSMUSG00000026317.7	Cln8	10.09060854249	22.405342760417	17.781375583796	16.172841604866	25.899211860349	21.620603828886	TRUE	19.700989706341	4.62015310660995	1.46406859635958	0.60875705596332	0.52991893165579	-0.200094919834652	0.784846605734793	0.64729610909704	0.62487246503932	-0.0508640626001501	0.190247537282415	0.80914259846593	0.82174057733454	0.0222890313949985	0.425355120021858
ENSMUSG00000013236.17	Ptprs	4.6467269391908	8.5129030163371	38.861000134184	41.260740381654	291.19361286338	227.12494472902	TRUE	40.060870257919	49.6390125583579	7.48166283477495	0.79902240755146	0.6307678051318	-0.341126936483555	0.276803621117287	0.72622226363077	0.75557043634973	0.057155094460683	0.576224288963215	0.7319619612783	0.69008727679128	-0.0849898421299258	0.231829023936947
ENSMUSG00000028382.15	Ptbp3	16.778992474131	14.334971194091	22.415699069458	24.366602185078	6.0182691910818	3.9783883964003	TRUE	15.556981834111	11.6149386527346	3.2847240426423	0.52367692843765	0.58103242356876	0.149941627554389	0.717106358781354	0.32596250844161	0.32255537112157	-0.0151591975976961	0.916216101342463	0.47334979780312	0.47194024800047	-0.00430249324294931	0.661515037427874
ENSMUSG00000048756.11	Foxo3	7.5162936469384	7.6090481182014	20.365253643055	24.919898866814	46.406868349561	30.605078075062	TRUE	22.6425762549345	17.0469570070208	3.41403862673803	0.58808408940806	0.71190871230616	0.275669798026598	0.585476066338629	0.53189329263239	0.50394210349156	-0.0778788481442027	0.521232847342023	0.53289454622155	0.51770284723926	-0.0417258155740292	0.432178294191366
ENSMUSG00000024219.16	Anks1	3.8516851780023	3.8188648420052	8.747494479607	10.473430930595	16.019883224995	20.88273570283	TRUE	9.610462705101	8.56229327675118	3.30436379776881	0.60448338432263	0.69477912511083	0.200851724325256	0.396860082377656	0.61581972087455	0.64471064747608	0.0661437413011977	0.454479181416122	0.44688853828198	0.42222316272876	-0.081909317597494	0.318474393205249
ENSMUSG00000036046.14	5031439G07Rik	6.2791640420196	14.280936324738	91.65408931515	82.42940847579	67.384943614408	67.704609031521	TRUE	67.5447763229645	28.9062115359966	4.43853413669815	0.52529421202268	0.57943107626611	0.141511373666476	0.532534506277629	0.63114635678179	0.57058986551476	-0.145520468297378	0.0739923821103776	0.79918574948194	0.8172028742283	0.0321634200239482	0.367671766049694
ENSMUSG00000042331.13	Specc1	2.0153144832763	1.4117465305956	25.98645440631	35.888778031581	46.984569604171	33.044573187351	TRUE	29.5155137968305	17.6743118472021	6.62492296696274	0.60601306486454	0.44928077903757	-0.431731554347149	0.235280411534899	0.15682051697851	0.16598739954771	0.0819594067407813	0.72147696928439	0.23103033037729	0.2006177711846	-0.203632856685247	0.959837790144018
ENSMUSG00000039458.15	Mtmr12	8.7702702569552	9.5599504514815	7.1908952268599	8.0710544599905	13.703596173522	9.587844439357	TRUE	9.16511035421835	1.12439641170439	0.903269494991218	0.55010699347491	0.60406349818471	0.134987967317913	0.861873222481173	0.39231532038409	0.3709091124316	-0.0809479633266628	0.575329487011208	0.598662427874	0.65912847321294	0.138816964397847	0.263109042518885
ENSMUSG00000009681.10	Bcr	3.1076357951827	3.7300735556146	16.93587444248	19.493367726544	20.312050391593	22.799606768021	TRUE	18.214621084512	4.95367423252437	3.82830758895634	0.60007006254354	0.65636091650997	0.129358379386687	0.667502424982236	0.66515294147931	0.64702580606809	-0.0398628498218447	0.622936932039959	0.58988774362501	0.5598179594744	-0.0754826632893124	0.332275796455008
ENSMUSG00000068747.14	Sort1	1.5390705170733	2.8705465462088	9.2482960215701	13.493142099841	56.308059334109	39.648473400216	TRUE	11.3707190607056	13.589378950391	6.60295124353029	0.81962890206458	0.57972900857084	-0.499592180885933	0.3031190644796	0.6496163398417	0.76160678032232	0.229458401338174	0.0754958013995639	0.6171339141109	0.61825330635754	0.00261447108769013	0.963284776056264
ENSMUSG00000025860.15	Xiap	12.968245250927	7.5407030269761	8.7271362781315	13.917118740109	3.9659129005084	1.8029341127883	TRUE	8.1339196525538	6.67342897136531	3.37459374034541	0.4421402978174	0.58761894671524	0.410376682483768	0.198050732383973	0.16112607170152	0.16470033449305	0.0316535306148042	0.92326844537777	0.40374775156274	0.55531891984246	0.459862324134982	0.378166495971385
ENSMUSG00000046572.10	Zfp518b	8.5845077612634	7.8972348290361	12.009119226069	12.479892049006	13.326267472787	8.4553493695354	TRUE	10.2968134936662	2.98339348829156	1.24825096036024	0.57353703027784	0.780975737668	0.445391092802161	0.344762921974685	0.38948556772518	0.40683192718757	0.0628630322316419	0.758593039459569	0.41286183767236	0.51954761752833	0.331596909831724	0.352571356462713
ENSMUSG00000035378.17	Shq1	5.9074102530191	5.7269347358069	4.3989666349963	4.2350964462882	5.6142275224066	6.5310284785377	TRUE	5.67058112910675	0.813411049689388	0.747872642894207	0.55313622406237	0.59756100105775	0.111451170739913	0.339063041862195	0.75705454634187	0.74910857788258	-0.0152224091291091	0.692295711310476	0.41804026153183	0.40685272764253	-0.0391352322938104	0.245501557789419
ENSMUSG00000000568.15	Hnrnpd	8.5172516228055	10.558061019912	5.3459503000475	5.1701357904213	15.487026240298	7.4829786105632	TRUE	8.00011511668435	3.86373767663555	1.90711681492514	0.52023684699018	0.7334031012221	0.495437781405004	0.468328787028062	0.60747922338375	0.60230583826273	-0.0123388241276434	0.952127471166318	0.51175234420178	0.51184124932184	0.000250613088933684	0.994676179008032
ENSMUSG00000061589.14	Dot1l	9.2569097798712	8.4608133440968	6.2088156105986	8.2040069039657	9.1284603843427	6.3860135191641	TRUE	8.33241012403125	1.27544365284303	0.787509584769975	0.50051066370983	0.51781625368392	0.0490394436046167	0.140005994607597	0.48952874063674	0.48973894907895	0.000619374426364343	0.995391684834464	0.36482709200197	0.33561190569153	-0.120418972098836	0.364055496315699
ENSMUSG00000058325.6	Dock1	4.4005834176133	4.5547860702241	20.171156013565	21.993413344552	47.57741402407	29.401537026584	TRUE	21.0822846790585	18.4188964839496	4.33197876666151	0.63519269027335	0.73443439847469	0.209439321188767	0.323365566199236	0.52741386939674	0.5123767863345	-0.0417303956010219	0.717554372994576	0.43538895700416	0.38765795376181	-0.167520550485187	0.15067333893231
ENSMUSG00000075703.15	Selenoi	1.1201728670537	1.3046684200015	32.9386823846	37.956933605386	13.78674099859	8.440047702981	TRUE	11.1133943507855	14.6791836183806	7.24238734364836	0.66633898377114	0.8052406283678	0.27316366508602	0.46236430848786	0.52879088557282	0.56427405106675	0.0936986964971356	0.348890687398502	0.48849764615726	0.52772949185855	0.111446999430299	0.93185322201734
ENSMUSG00000035293.13	G2e3	3.7907580068462	2.3608285695265	4.8140231153963	4.9919875103373	3.4326874651284	1.936986453666	TRUE	3.6117227359873	1.81855311685328	1.75844376202289	0.60826144087511	0.56896696796065	-0.0963466536493019	0.931507150887797	0.23152880275622	0.2870538869713	0.310129911662903	0.254017135163984	0.23111104089003	0.27948709571777	0.274195490041115	0.58223145014554
ENSMUSG00000043683.4	Fem1a	7.5023249624832	10.737826546623	23.287581657426	22.824252967093	39.998045550869	43.32303448702	TRUE	23.0559173122595	20.6612786934555	3.08862593858851	0.55255827958391	0.61730949594411	0.159867347339996	0.553425788006118	0.76359844954792	0.73428291943789	-0.0564781323840061	0.0479281074088202	0.79955135999672	0.78037707014016	-0.0350193218822681	0.390979917497192
ENSMUSG00000021770.11	Samd8	5.9630882647541	12.433506472546	17.778241121467	24.459015192891	16.759198318923	7.5209543111741	TRUE	14.5963523957345	7.60372671247013	2.5702449206711	0.56539643437625	0.60582601689971	0.0996407503249594	0.808570721693761	0.42452781501025	0.41065927779429	-0.0479171896345305	0.684936115748525	0.70902936901679	0.74370126554528	0.068877839953211	0.798788287060155
ENSMUSG00000035093.16	Secisbp2l	2.6031124385601	3.0335888859769	12.922547413496	23.860756107067	9.4794769119606	4.3541949690759	TRUE	6.91683594051825	6.07641427353308	4.44274395793186	0.49391550345815	0.69662697480493	0.496122084055767	0.337986360474152	0.38368027745695	0.3822299216106	-0.00546388777861943	0.934214193531462	0.47659835435977	0.47790808274483	0.00395919767214289	0.646733090881279
ENSMUSG00000036894.3	Rap2b	4.440706671209	4.8930425811778	13.127792304438	14.834339954175	32.194851768732	20.091499718699	TRUE	13.9810661293065	11.2666162760445	3.51568877158617	0.556272548187	0.50430541867448	-0.141494184076123	0.600357407139193	0.60472906547879	0.57907751490855	-0.0625324425441636	0.445914946820028	0.73277629004278	0.77584492127357	0.0823954861946171	0.0702333011700995
ENSMUSG00000023088.17	Abcc1	8.8361332736016	10.107554085303	71.027500302589	65.390826434652	17.09632671889	14.539672669039	TRUE	15.8179996939645	9.40881090711579	4.11329933756835	0.77266167966365	0.76866771357902	-0.00747677684691576	0.551509264284555	0.59736214709049	0.64664220023761	0.114361840014003	0.358874990553611	0.43852304308267	0.48376583459575	0.141656230243109	0.055383250083875
ENSMUSG00000020646.17	Mboat2	4.4685366423179	6.8361557533841	18.862000206852	21.378285297898	47.41502068315	27.72891134405	TRUE	20.120142752375	15.4877997193606	3.887354513115	0.73059768692642	0.48293948403548	-0.597234766329291	0.247534654995072	0.44482818483981	0.48553253134408	0.126319759603726	0.21547666863028	0.59220104113007	0.62332451084049	0.0738964177413004	0.355745118340594
ENSMUSG00000020668.10	Kif3c	2.4345656352282	2.5828292301626	16.222870126783	16.842008879375	40.941441526873	50.369601102973	TRUE	16.532439503079	20.7915999935507	5.83033118597232	0.62551579836178	0.54721291927539	-0.192944030785135	0.568038885734953	0.60859659464391	0.62044373457655	0.0278141229793976	0.648784988968363	0.70479428285526	0.68142509517858	-0.0486471422079337	0.144414485608683
ENSMUSG00000032244.9	Fem1b	28.817014199351	36.707718058281	39.345868481354	38.623697735686	40.282377876895	23.319019544341	TRUE	37.6657078969835	3.18524049730224	0.908948759266137	0.57957792060622	0.7094887570302	0.291777187139803	0.597135809254444	0.52882737893076	0.50946552134524	-0.0538123576176377	0.692469026395098	0.67311490179392	0.72784469176065	0.112777843314622	0.681222044959062
ENSMUSG00000033960.6	Jcad	1.1391935360485	1.0060138146028	16.538333393178	19.773445948638	5.78494461371	4.9724166417218	TRUE	5.3786806277159	6.38418968961378	5.80505727360678	0.60576628221818	0.59964428041735	-0.0146543557060301	0.912971524956419	0.32893097322724	0.3659738022361	0.153955515235172	0.459850640976316	0.48574254779663	0.53250168683646	0.132594233126699	0.331372139169016
ENSMUSG00000050244.9	Heatr1	8.3306224000987	7.2000185747767	14.635072167062	17.364262868307	23.699771890491	14.227200567294	TRUE	14.431136367178	6.69663767908281	1.9541230681422	0.73893680638174	0.88608174841935	0.261988814681303	0.252376877359918	0.34085863086702	0.43220144252127	0.342530373437597	0.28647158475072	0.36753969936477	0.42597865173182	0.212881041062508	0.286368663935402
ENSMUSG00000046707.9	Csnk2a2	11.459212834115	12.807859022117	19.864384902751	22.424196271999	22.882038751856	15.586833066723	TRUE	17.725608984737	7.12859080333753	1.49414174724229	0.5445096042083	0.55387137287116	0.0245934781739914	0.914372965136824	0.49818618178206	0.51855408588555	0.0578094658902847	0.496362994658745	0.60380460815998	0.65287906850126	0.112734021609653	0.313948200341446
ENSMUSG00000041977.18	Arhgef11	3.2882966404472	4.2325636591565	15.886535750254	17.276065698534	20.263072609062	13.432449658359	TRUE	14.6594927043065	6.0935993440161	3.39274318292858	0.57721605630605	0.68792123491471	0.25313195822471	0.465406742699862	0.5801774834182	0.59914118828792	0.0464017098778175	0.630990751151272	0.49452696065871	0.5902696582516	0.255325008464707	0.0366217365216858
ENSMUSG00000040177.10	2310057M21Rik	3.8348010006902	2.8927900299229	4.3428015440687	5.3812024400264	3.335413760609	2.5143394172472	TRUE	3.5851073806496	1.07489353543628	1.30672075674723	0.5570786601275	0.5550468564596	-0.00527148472600912	0.863262255140594	0.61340055950366	0.61171372540073	-0.00397283545371869	0.999399515604781	0.50642362931581	0.546406617819	0.109630235657819	0.139321058474778
ENSMUSG00000042496.18	Prdm10	3.512184041524	2.7862261162881	2.4751015861191	2.9730832374108	3.491668452131	2.2528557275216	TRUE	2.87965467684945	0.753581017774621	0.85304921047705	0.58061379500927	0.63790010384385	0.135751663498469	0.764664228665183	0.29997068394163	0.38682062047698	0.366843190075357	0.155611818826449	0.34578965164253	0.35863198010244	0.0526094481698469	0.866188509779681
ENSMUSG00000029381.16	Shroom3	3.1845049825971	2.8114220023029	1.6597934370119	3.4333407416249	7.085849307805	11.081599472582	TRUE	3.308922862111	1.59129703020171	2.89823911143702	0.55851578808343	0.65538353018095	0.230741355058868	0.386557387995731	0.56587872135189	0.53290042766264	-0.0866268981186655	0.664295837542628	0.44061423101913	0.39200656391587	-0.168638280544619	0.102819940766002
ENSMUSG00000025047.9	Pdcd11	8.5178379848056	9.9440333439227	11.565254903905	14.303585435818	19.575621910766	17.961726872018	TRUE	12.9344201698615	5.49078612785037	1.63589786212987	0.57209148842298	0.70432792107916	0.30000139529147	0.478924479246427	0.4392456994205	0.52255196796908	0.250546359713284	0.0769568896408367	0.33793691229433	0.32239076025033	-0.0679435456381692	0.541203638230787
ENSMUSG00000026657.16	Frmd4a	5.2144456894162	3.826689077567	16.82437706104	25.198707787014	19.081572564336	10.821352569169	TRUE	13.8228648151045	10.279701152378	3.62339062535319	0.51483512899926	0.63729002190171	0.307839575501579	0.571163372364163	0.37650658594573	0.39918794002561	0.0843930345909045	0.554961408362024	0.44458466180866	0.4821863860768	0.117132742666304	0.54374065577858
ENSMUSG00000056536.14	Pign	4.1626476386182	5.0516522814613	14.168920839665	18.467971463771	7.1094796479252	3.4830367999849	TRUE	6.08056596469325	3.34730122491773	3.23474665279674	0.65107782296555	0.61723653926865	-0.0770065288922554	0.892415970999764	0.4956615864671	0.5183790522973	0.0646519651057886	0.532193978601845	0.57384362824284	0.55891916523218	-0.0380180120562271	0.677531561818028
ENSMUSG00000034269.12	Setd5	17.327961278797	16.933726562311	27.607813817329	26.97770845766	34.037269471822	19.276672588606	TRUE	23.127190523133	7.62045468681377	1.50004140531129	0.61453633099158	0.5984225116126	-0.038333856398615	0.93497939418556	0.25925957962365	0.26882847668741	0.0522886717106947	0.836971668530394	0.52073670517577	0.52997461619	0.0253691600332851	0.952305516575349
ENSMUSG00000045205.16	Dpy19l4	3.720656026408	4.4653728010053	9.8424622503165	12.552552578337	5.4878961310653	2.8065993318593	TRUE	4.9766344660353	2.53970386226039	2.67694865262923	0.61289141643505	0.60364063342047	-0.0219415773416805	0.72648311163279	0.41010469287758	0.44219751628444	0.108698669217492	0.415540776546213	0.48404024984082	0.56195629519245	0.215330914425076	0.624322872746415
ENSMUSG00000074802.11	Gas2l3	3.6067355809871	2.966140680747	3.3882387384661	3.4240163973204	5.9443556858136	2.9133031826835	TRUE	3.40612756789325	0.474872999547986	0.919200018666228	0.5834647897139	0.63155208756871	0.114256129503136	0.673865725649868	0.23340923561844	0.25903383498449	0.150278907725037	0.609414751692462	0.32980653563854	0.30724191399128	-0.102244946170252	0.562096589004291
ENSMUSG00000003660.10	Snrnp200	8.6670522798094	10.674799341477	30.061375020308	39.194403414105	74.126808498954	60.676238667696	TRUE	34.6278892172065	37.0011939465708	4.14920775785916	0.68382175451818	0.84745441945807	0.30951545446949	0.428957044230379	0.47828412850559	0.55966303664356	0.226690549643278	0.268976000903993	0.39921874591344	0.43831155573626	0.13477724870396	0.159098097515123
ENSMUSG00000061315.14	Naca	113.8835813997	129.18073735585	132.25436799163	141.00454857243	139.67846931993	134.97811407789	TRUE	133.61624103476	7.78196870497251	0.312131632293752	0.50339254828156	0.43811009362452	-0.200390407131627	0.218990644852887	0.47002976310735	0.4828958141248	0.0389598442249148	0.524688694007245	0.39498439243817	0.46318380815059	0.229789173659213	0.107220630977746
ENSMUSG00000037172.14	E330009J07Rik	1.1576856232078	1.683652220842	1.9792372566383	1.9399038806343	8.3660103854006	4.3489022210302	TRUE	1.9595705686363	0.798975581266062	2.94678545091149	0.63062986590079	0.58102485260928	-0.118193621586683	0.976847996332633	0.49765442348157	0.42487545632902	-0.228104260942279	0.271104749765173	0.63325183704277	0.66830985967011	0.0777378014738065	0.590168540120809
ENSMUSG00000005198.15	Polr2a	7.233769927476	6.6918160117976	6.5611869047575	14.99297854609	6.516556274657	5.4116578591083	TRUE	6.62650145827755	0.531670480834725	1.14315454803482	0.44155321616453	0.66761559669832	0.596430336522118	0.246945930522249	0.44780564763039	0.56051539591406	0.323881277420534	0.096334274218281	0.3333990640204	0.34593279934027	0.0532417540371737	0.896838375265506
ENSMUSG00000005225.15	Plekha8	10.204689803858	9.4434012004232	5.8679117061119	6.7101960196536	8.4219096509046	5.0948814626285	TRUE	7.5660528352791	2.65051036213297	1.3976368350831	0.62851896906342	0.45647640300874	-0.461416002892271	0.343047192270276	0.19713516732747	0.19261380766907	-0.033474036932756	0.868942822810912	0.50689732414544	0.54257618431994	0.0981321756551803	0.537406640384344
ENSMUSG00000026349.14	Ccnt2	13.951349055725	13.831169819433	7.1608807957266	7.9322268062788	6.8272382624496	3.6073302718489	TRUE	7.5465538010027	3.45337501089112	2.16091355263095	0.52189668649263	0.63662908550098	0.286688828140667	0.4495995121123	0.22025185201824	0.23418246080045	0.0884788783004993	0.505006452405295	0.26816274642209	0.33664632919294	0.328124903935378	0.286630452666651
ENSMUSG00000000915.15	Hip1r	1.2645983167541	1.3357708285273	5.2492219750837	5.9788328682245	11.111167806471	11.37609606767	TRUE	5.6140274216541	6.39570340794727	4.44534747453181	0.75340097296892	0.61900892749579	-0.283457679949585	0.412522724712447	0.63593911976239	0.67557351511456	0.0872241115963661	0.534430677339924	0.64533279132105	0.64579861950404	0.0010410219022349	0.765453880411686
ENSMUSG00000021824.13	Ap3m1	5.8949492389407	3.8521425264202	9.9834051821976	14.407240823456	9.1314088906284	4.3962363643507	TRUE	7.51317906478455	4.14176824466991	2.57690092492069	0.5652610783731	0.5964942685201	0.0775909135175567	0.681163208820601	0.36699687159632	0.41929486907389	0.19219741087477	0.101379867918973	0.53600692014339	0.6063346461523	0.177862634054576	0.751381269753796
ENSMUSG00000070639.5	Lrrc8b	1.4231066209461	2.1185485765056	5.0505930221878	3.7748305029193	5.4149029761488	3.8410470789412	TRUE	3.80793879093025	2.11242213213373	2.22247668997706	0.66524843109052	0.49462662087803	-0.42755331494819	0.62385598209888	0.25075052269584	0.26534216327778	0.0816012320677919	0.724125052283535	0.61731149195917	0.71155042000716	0.20496733979224	0.40250782898637
ENSMUSG00000025969.15	Nrp2	1.5845499387708	1.9847803375161	18.777225688637	26.231143601776	4.3364703688852	2.6239918764705	TRUE	3.48023112267785	2.5138461286707	5.55614742730921	0.62183384661982	0.57640626824164	-0.109443120714779	0.730244612471897	0.53301108199417	0.61260420645541	0.200789744452683	0.193481140791549	0.5003225758751	0.54949603031126	0.135250506836155	0.761375521236052
ENSMUSG00000049791.4	Fzd4	1.1026171013002	1.8958172417882	2.5124162027557	3.1464953249304	6.9545306910406	3.8490262616939	TRUE	2.82945576384305	1.4479138464561	2.77492131518178	0.47520319491687	0.70920143439896	0.577650918377789	0.359950868021357	0.58090500984111	0.58405075896409	0.00779148498504465	0.984607018862084	0.6568205453162	0.75384836070486	0.198775094152577	0.103919871902341
ENSMUSG00000027660.16	Skil	3.9492107412499	3.9191729360814	17.61293838305	29.059396326747	3.2716160402296	1.7933731273146	TRUE	3.93419183866565	2.07815635010518	4.47622841276101	0.5465524555294	0.70058446800731	0.358199038258958	0.364987852927126	0.34699037565614	0.37258724252759	0.102682629057928	0.531545269903788	0.46354831935437	0.56970360566262	0.297491806726536	0.555815981880729
ENSMUSG00000021279.5	Cdc42bpb	4.0098865206888	5.346305953065	48.432985203358	57.241518745129	37.11670325362	39.048339995931	TRUE	38.0825216247755	21.8753632161213	4.91302506805131	0.64959863097116	0.72944850302953	0.16725753956235	0.458373341322918	0.66076277693076	0.65425256537112	-0.0142847408137377	0.827773646909876	0.4899484282802	0.4643246633244	-0.0774959859570827	0.472472551206168
ENSMUSG00000044098.14	Rsbn1	3.5435802039929	3.184451219959	2.5154107393501	3.300830971889	2.2132599494849	1.2572073707458	TRUE	2.84993097965455	0.806216398908159	1.67179627858834	0.54949654626385	0.62505955982486	0.185883252416813	0.342057475142561	0.28334070859088	0.36765128215424	0.375800122362372	0.198843048930732	0.33616845930906	0.4090320615804	0.283029560434887	0.301340912324678
ENSMUSG00000014496.8	Ankrd28	7.4603756179408	7.5923074283769	15.734954890007	17.28418699605	6.9060695070711	3.6213038396481	TRUE	7.52634152315885	3.35461208031237	2.40397168968752	0.56247701422973	0.70209653458746	0.319875265737744	0.415977405395666	0.45413004192738	0.43102966562619	-0.0753183118387456	0.652299982100834	0.43667769082572	0.48082148976588	0.138932549105501	0.764718107857437
ENSMUSG00000021036.10	Sptlc2	12.649872075913	35.970728932275	51.67526710707	54.31726397362	21.344456011442	15.072759339322	TRUE	28.6575924718585	21.9369599306637	3.21119867608737	0.6083978457404	0.66675217256665	0.132135576036312	0.728475656197856	0.78188388598826	0.76738117404915	-0.0270110032404469	0.520246585846588	0.70191520240607	0.81948012078572	0.223412201709846	0.0202730382012666
ENSMUSG00000042439.13	Zfp532	26.895380515371	19.136102683222	18.970835243844	15.284487119013	33.323528019124	27.52920494541	TRUE	23.0157415992965	6.34431945977088	1.49214772091899	0.52501704920933	0.59273755303828	0.175029189627709	0.563006571843152	0.19931083594158	0.21017744844263	0.076587732362444	0.744583558846313	0.25920430804509	0.2282160865166	-0.183689208367935	0.333317665548352
ENSMUSG00000018583.5	G3bp1	48.559518391449	54.946989411532	76.383008926588	81.41019438978	104.14540270495	113.33707580562	TRUE	78.896601658184	36.4707837744108	1.55073548356168	0.58672815932399	0.72227004315842	0.299846100348931	0.698077639125394	0.61129441946039	0.667195550975	0.126242271844885	0.134464088802186	0.54469913969776	0.54827851683231	0.0094493571239311	0.458488139888128
ENSMUSG00000026116.11	Tmem131	7.9011427163792	7.0492821923829	6.5233683177588	13.372767258745	12.83486721618	6.4224205216628	TRUE	7.47521245438105	1.48603671820211	1.52428148480758	0.60295967675853	0.75794762524155	0.330036636142597	0.347346718898853	0.44639236559521	0.55494070147776	0.314021265899902	0.228261616541629	0.37903088472621	0.38846026204364	0.0354516152677737	0.784916206069171
ENSMUSG00000063870.12	Chd4	12.863421859392	12.441767285944	46.326475859928	62.874370561599	76.613810439153	46.771516130522	TRUE	46.548995995225	34.3890471133369	3.41402981740232	0.58972903390661	0.75625741663485	0.358825162321336	0.447154610041567	0.3832989807322	0.41332890919389	0.108820110986133	0.656291365683129	0.38926019962924	0.4430048999142	0.186587813827156	0.246478677692616
ENSMUSG00000035722.15	Abca7	3.4102806760709	4.6032396769301	8.9859808946339	8.8031226755593	11.307158448965	7.4745150160995	TRUE	8.1388188458294	2.9766913745832	2.03115404157129	0.65121514346237	0.71995948247449	0.144781468899555	0.0379013182179408	0.72355476198472	0.75903291841959	0.06906024433845	0.439886090718564	0.57738255007437	0.54458966570467	-0.0843579007964382	0.462754828196219
ENSMUSG00000028207.18	Asph	3.3916038576827	4.5820654751491	42.475851552701	46.698272202861	36.811770135264	20.123734045844	TRUE	28.467752090554	23.8984886905427	5.45310780233155	0.69719071646482	0.80149853877668	0.20114653098959	0.251270052420923	0.51084925312644	0.54028314040486	0.0808180351623908	0.413775531420193	0.49166357497372	0.43393486313356	-0.180192977060484	0.312326664972637
ENSMUSG00000063550.8	Nup98	11.651990953572	7.7886093263607	24.158178555156	35.446476921701	18.799827910934	11.432071338345	TRUE	15.225909432253	8.32564274751196	2.74193249470353	0.64677727839947	0.79209248602647	0.292399894471989	0.400161990031291	0.33808934444013	0.41171653204827	0.284246832201389	0.311223320865531	0.24180103718999	0.3370465558568	0.479127450046048	0.224163669381981
ENSMUSG00000044452.10	Zfp507	4.2155149110423	3.9016523817649	11.336285450505	13.337453522955	14.232217044109	7.6697225794179	TRUE	9.50300401496145	6.3482430387827	2.83664067380103	0.6202697392431	0.66355773282001	0.09732625003265	0.616286819274945	0.37314896845527	0.37052249404513	-0.0101905681539109	0.984071655674731	0.41536426939859	0.4335892809521	0.0619519737784958	0.98916979415884
ENSMUSG00000001995.9	Sipa1l2	5.4983928604488	7.1930899313956	16.102919612047	15.509929574301	39.461636059676	72.262082328756	TRUE	15.806424593174	14.0264089082455	4.3155719890468	0.66707910439041	0.69363133531523	0.0563112238788109	0.482678209788976	0.6459732180837	0.6200760444823	-0.0590291976757619	0.38895671437297	0.57628491736861	0.56699702387076	-0.0234410991692543	0.517841078150352
ENSMUSG00000020821.17	Kif1c	9.8231456394709	13.509312954919	152.93854720391	153.4813911887	92.579178482903	100.21115676065	TRUE	96.3951676217765	84.233624814396	5.25471008640301	0.57565786677899	0.58789400594143	0.0303444453102616	0.640630489737714	0.54795479120611	0.51743250527434	-0.082686181680297	0.50265957652085	0.69718406111704	0.69413026932051	-0.00633314450848514	0.534806585119116
ENSMUSG00000049739.10	Zfp646	14.332668152991	15.103694619939	19.190774370886	17.981959234752	29.796098649586	30.724818777395	TRUE	18.586366802819	5.73497169828644	1.50702808711838	0.59066057386112	0.64080896019915	0.117565004178507	0.593141679387516	0.50330291347959	0.50890338708527	0.0159648442107599	0.986500658994261	0.47971466122148	0.45700239876169	-0.0699747945354955	0.232381280392434
ENSMUSG00000029190.19	D5Ertd579e	5.8210829021959	4.349576630377	11.265962383285	13.875005384817	11.826433851388	6.1724602279817	TRUE	8.71921130563335	4.4517666586361	2.47054990927973	0.55900808645863	0.56090558905676	0.00488880574963743	0.915896966641877	0.19554361999838	0.17712811601516	-0.142697232954991	0.770961519784906	0.31757451220685	0.31346989470753	-0.0187682348841255	0.864345295223052
ENSMUSG00000026932.14	Nacc2	1.3628733590065	1.3568232456272	21.770727510259	34.142195104696	50.225825923378	53.787031357612	TRUE	27.9564613074775	35.6564815679317	7.73678810648329	0.60650577507414	0.55380005878445	-0.131156175734485	0.697739059820913	0.58001044649631	0.56969858210321	-0.025880069120679	0.863442655270853	0.70531172161906	0.73263448896593	0.0548326017534735	0.205552045059612
ENSMUSG00000029787.10	Avl9	3.7754195016217	5.0964274639161	7.4473641854571	11.643839379249	4.5378579960651	2.507328728151	TRUE	4.8171427299906	2.48449454875356	2.33099266650998	0.59568505333874	0.58593098077182	-0.0238190264276228	0.787133769558553	0.50077457704451	0.48897521297309	-0.0343999882060125	0.869191855180339	0.63746585163922	0.6594993882116	0.0490232607349789	0.973017050188714
ENSMUSG00000089824.10	Rbm12	4.761937696301	2.264085586861	2.6239210423152	3.0653874836781	2.3204909613506	1.5408437693016	TRUE	2.4722060018329	0.594005096110516	1.55421851189299	0.54907777794823	0.72372252957405	0.398426159287564	0.211208081374012	0.3702241698661	0.43927093206289	0.246711951151528	0.454613337254784	0.32241714602761	0.46727541231805	0.535344657759989	0.42806818662948
ENSMUSG00000024754.13	Cemip2	3.5319022946817	9.0382296627492	18.18438303744	43.342941720255	32.513242674379	26.02008198517	TRUE	22.102232511305	17.4020271455212	4.14579687460245	0.73427782905778	0.75373760294616	0.0377363289810423	0.783763655790284	0.68228207480428	0.70940882539794	0.0562489645088747	0.544200363217857	0.62643607185954	0.63243226572451	0.0137436844143168	0.858645143992046
ENSMUSG00000092035.8	Peg10	1.3249577477249	2.3501208391617	8.7809822788175	19.414120729961	19.746147517705	24.630571086068	TRUE	14.0975515043892	11.9954316405694	5.84451188594833	0.55342785245076	0.4893881928607	-0.177415957610032	0.841924710290782	0.60951226138538	0.5886923839574	-0.050141280115624	0.586063013542878	0.6780540840918	0.6230633482292	-0.122021499919391	0.230762399739705
ENSMUSG00000040549.16	Ckap5	5.321202760686	3.8455709400914	11.243518375111	17.381807425885	20.385123920397	13.399271515386	TRUE	12.3213949452485	8.94052623831202	3.02701660550061	0.51161761533657	0.59873304992802	0.226846970846929	0.242227604559313	0.25334365936741	0.31700776911514	0.323422476021773	0.407908073530593	0.24459064648561	0.24622247413236	0.0095932167629605	0.899035162939217
ENSMUSG00000004085.14	Map3k20	1.3534554646829	1.5903422396123	43.833575953376	63.058682821735	21.349899483614	11.324658808647	TRUE	16.3372791461305	22.039412823859	7.7919201883626	0.63502017989386	0.57486718410268	-0.143573761232943	0.708418734622955	0.49789869123812	0.49201901618327	-0.0171381474089936	0.983343102827316	0.61961538629229	0.67259274834773	0.11836025474852	0.609400890957481
ENSMUSG00000057672.16	Pkn1	4.8486310406094	10.336510442492	34.796100652356	35.750248866058	23.503808220001	26.163521448064	TRUE	24.8336648340325	15.4776174150637	3.31888749403408	0.62071973800126	0.58752437495637	-0.0792933154653583	0.717485993260645	0.74408272899894	0.7205433500927	-0.0463778027736852	0.476609107485988	0.66827074137313	0.70654519996259	0.0803491467026542	0.0907861081956345
ENSMUSG00000020262.15	Adarb1	1.2507489051694	1.0875767234538	2.8701592324688	1.8084491872492	5.3305792594763	3.0656432778998	TRUE	2.339304209859	1.34538119850505	2.94792064401268	0.61553011132628	0.58180288630421	-0.0812989805073565	0.863696539586526	0.52823601329279	0.45426610881127	-0.21764498775249	0.110188637677233	0.53279624553924	0.48599111162849	-0.132653987806029	0.290924768551513
ENSMUSG00000058290.4	Espl1	8.5307965625432	9.1139272458038	5.9026372942099	5.3861011361404	14.650296628148	14.134309893833	TRUE	8.8223619041735	4.71169196070896	1.93996569782076	0.632096778001	0.77875105000504	0.301016742333378	0.27845643201751	0.44832221481432	0.47378579359389	0.0796989520587911	0.867615562904759	0.35026276752316	0.36522498960779	0.0603478418216357	0.66210264761391
ENSMUSG00000018476.7	Kdm6b	5.2784827355726	2.7312847856257	1.7730784982781	4.2318766378194	3.5712024542916	2.3019967896042	TRUE	3.15124361995865	1.43061993148193	1.96792026901865	0.46483263237355	0.38276049906352	-0.280269401796184	0.513841774604258	0.18053732062943	0.27218263323828	0.592277916335258	0.171203365958958	0.25985550470132	0.26101161677153	0.00640439690161589	0.713451270150165
ENSMUSG00000028152.10	Tspan5	4.4905554507001	10.98123367816	21.775453681969	18.488758019542	72.408094653054	33.744716904092	TRUE	20.1321058507555	16.8745701153834	4.06659826227673	0.61312951071466	0.52185921512451	-0.232531189707374	0.947793687156188	0.50511537406318	0.50854090435078	0.00975086817215269	0.948711240427335	0.79978244426809	0.81312583210525	0.0238710147761801	0.544852801685136
ENSMUSG00000014547.10	Wdfy2	2.8050897031482	3.6158134973372	12.701953718416	13.626438372083	13.407027398796	8.1517934106456	TRUE	10.4268735645308	4.58102542917924	3.3345563877729	0.57606687023512	0.72388753539117	0.329529284331566	0.501574843514978	0.51483303152674	0.513139766267	-0.00475278647010047	0.918980351257403	0.62575510337589	0.73142806726793	0.225117836700293	0.201070325612146
ENSMUSG00000075470.2	Alg10b	13.676448249062	16.494163379168	31.087822349922	34.225434658933	16.56868285128	8.4901728292837	TRUE	16.531423115224	8.07737170525344	2.21970839942049	0.60245033617354	0.54406443074809	-0.14706480314858	0.935701296417582	0.42669506027957	0.39891539039121	-0.097122624463956	0.467695902554186	0.66644529468208	0.7564869037279	0.182828650562816	0.339775300530718
ENSMUSG00000028243.5	Ubxn2b	1.3617046669544	1.3362931739341	1.2066466646554	1.7317216018623	2.6777266044222	1.5558496027075	TRUE	1.45877713483095	0.27770167775397	1.1896239767584	0.57295174672198	0.51869416661101	-0.143529497315343	0.869395773735789	0.47730756022403	0.40584418439659	-0.233993247517219	0.200812118312071	0.70455856360032	0.74637678141536	0.0831844772099047	0.846307354217515
ENSMUSG00000072825.11	Cep170b	4.6058754111098	6.5188195884059	77.818988183529	97.353237168709	8.5991351086466	10.492056708165	TRUE	9.5455959084058	5.90556409066145	5.72966222046286	0.63679591248342	0.6210067231387	-0.0362221879994648	0.125670712817874	0.57555691503152	0.51556863581851	-0.158794097795429	0.0896814737196231	0.62219566603585	0.61389609237086	-0.0193738589839848	0.442409997322523
ENSMUSG00000055660.9	Mettl4	5.5397964211449	3.5190559524953	3.8783624425294	4.1251134313573	3.9008621142419	2.4081492171343	TRUE	3.88961227838565	0.449270409080401	0.997784589805377	0.59401544486373	0.52390571734672	-0.181193236583539	0.800199547293921	0.39451459586593	0.40352104010089	0.0325652227718508	0.796889159127003	0.54133758237817	0.64194410479108	0.245919134129837	0.575519967888574
ENSMUSG00000052539.15	Magi3	1.8664547081994	2.3323975499096	3.7313155252771	5.3489478220626	4.3421361090656	2.0720213149339	TRUE	3.03185653759335	1.57543822668718	2.26256505523771	0.57540435669801	0.65027379296717	0.176471137579256	0.478095510793985	0.45237746078261	0.41523992860576	-0.12358187348617	0.569401856630188	0.4633418165882	0.53832852246009	0.216409974788777	0.692041439821583
ENSMUSG00000040818.10	Dennd6a	3.6267799537835	6.0760662548228	8.0961460019553	9.0536216302051	18.914287752822	9.7736755010291	TRUE	8.5748838160802	2.74103773421273	2.23868423332224	0.64664528490652	0.55946785620407	-0.208919299040559	0.801646569999716	0.44106559486569	0.41599434405197	-0.0844293146959331	0.540340551805023	0.73282686102886	0.76058188634803	0.0536311959127647	0.484053802452939
ENSMUSG00000033444.14	Specc1l	5.5186471319816	5.621804396981	21.427269402327	27.709699722432	29.207813935069	20.173561660756	TRUE	20.8004155315415	11.3542568072421	3.32172483495934	0.61325880297897	0.74792223395874	0.286392234106056	0.458335247714417	0.39399914658261	0.4328078525752	0.135534169940969	0.372416315970021	0.33058563959037	0.38595268840708	0.223399950795717	0.292535652753856
ENSMUSG00000029207.16	Apbb2	5.7731092475773	5.1392851531915	24.942249467467	37.664586895841	8.4075737283975	5.7902178806924	TRUE	7.09889580454495	2.43546495052843	3.82812166295379	0.63570578830136	0.52484963078735	-0.276455074267916	0.348802303832467	0.42049394347478	0.42486257386455	0.0149112412962606	0.913499158085117	0.41498896252281	0.35036851707268	-0.24419982047817	0.246388644939322
ENSMUSG00000041720.14	Pi4ka	4.0129644734783	3.2693710046029	20.212630100861	21.056089839895	33.317823915418	19.137462495163	TRUE	19.675046298012	11.1371586253809	4.03381433720033	0.67432751845835	0.78478663645628	0.218851001754866	0.173867998556498	0.39794282393281	0.42099698732685	0.0812487488065024	0.711515797542757	0.29288229365604	0.34588327192136	0.239964264801217	0.273191794014459
ENSMUSG00000027309.18	4930402H24Rik	2.4108922537015	2.1270988442216	41.155610116004	51.689298109778	24.247699760227	9.7422932588388	TRUE	16.9949965095329	21.8327690241431	6.93970031653486	0.55070758396234	0.65936818893987	0.259797809791356	0.393955065282942	0.46250834703019	0.51223353344424	0.147322299647414	0.247115704048878	0.42055665212377	0.46771495166538	0.153329393435495	0.29961065717926
ENSMUSG00000028613.14	Lrp8	4.3410566879292	6.778588202237	12.081500755324	10.307086018948	11.973141170673	6.961808188898	TRUE	8.634447103923	3.85072211550161	1.98484706329239	0.71071816334347	0.46562294958358	-0.610115402325213	0.335541658781156	0.58275400515134	0.57176688707164	-0.0274599436373992	0.771028292097653	0.66458330643412	0.70424434599014	0.0836260213518902	0.487510214143971
ENSMUSG00000031592.10	Pcm1	2.5715790046313	3.0672419211704	3.8140294162315	7.3698982276095	5.8256161410843	2.9170679038157	TRUE	3.44063566870095	1.03235248918427	1.96247704711696	0.5370368432965	0.71342535973194	0.409741432002064	0.202986934767179	0.1971926714003	0.31054278102003	0.655186095376085	0.162498519690797	0.24561872563379	0.30619425575314	0.318026663945299	0.677075904656786
ENSMUSG00000014498.9	Ankrd52	3.3179870687201	6.046984082683	21.195709899831	34.807549029201	13.065763035134	11.77692678901	TRUE	12.421344912072	11.2297504482518	3.70856818375655	0.50552356169368	0.49474629086748	-0.0310894441720977	0.693998342380516	0.72566649456844	0.72143231884171	-0.00844260488550256	0.851894739310942	0.52564581091323	0.55446293925607	0.077000018295628	0.93016514903988
ENSMUSG00000029094.12	Afap1	1.7929716723892	1.1769180781993	19.222677521194	31.11297846245	13.379630223712	12.454976410467	TRUE	12.9173033170895	12.920640945719	5.7185552929445	0.51066745911632	0.65071183921543	0.34963467253445	0.366714264935149	0.34993588007672	0.45614864289702	0.382413428456898	0.0813631047274719	0.30031399798069	0.27886463836955	-0.106906718151671	0.445387099386002
ENSMUSG00000059142.16	Zfp945	3.5341463853538	2.4678786058365	2.2868039775773	2.4894048151283	1.9746244473116	1.2843039473701	TRUE	2.3773412917069	0.38160668666252	1.32012404127619	0.51323330532477	0.4934455894439	-0.0567237820801879	0.790528307456254	0.32454950140926	0.41168239878752	0.343093228661791	0.175393189051822	0.26762625475841	0.37689208192338	0.493931831265527	0.138146609522792
ENSMUSG00000037331.15	Larp1	10.898930248259	10.269933965759	23.787585208039	34.456736468766	24.934508179871	21.841087158598	TRUE	22.8143361833185	10.2021948326466	2.12344288696667	0.59541247131791	0.70482765104625	0.243381083522608	0.453286178583031	0.36916904227758	0.41895407240666	0.182510521248258	0.355262450677703	0.4126282628823	0.44261542313522	0.101211081689061	0.573279880375104
ENSMUSG00000033658.16	Ddx19b	8.6220496986148	9.5152052444777	8.374098060885	8.899672798785	6.722474284604	3.6853204813926	TRUE	8.4980738797499	1.05170475935344	1.25827127089092	0.6301039123289	0.54894811134723	-0.198919980724952	0.707487062297933	0.53287138000873	0.54093874956074	0.021677897623465	0.827464544460856	0.61982883516472	0.67575647979041	0.124633568395409	0.501998291482058
ENSMUSG00000036197.16	Gxylt1	3.3504242704624	6.1465468116269	7.1630599352489	11.86394836234	2.8675667579525	1.3180366515003	TRUE	4.74848554104465	3.18424909232982	3.71963785690002	0.5623116136129	0.67356614261468	0.260449778254048	0.508338558340604	0.49106100734268	0.45519222406903	-0.109426357335806	0.596308806478233	0.49608317241115	0.57012460823544	0.200695253183811	0.669355050989373
ENSMUSG00000025272.16	Tro	2.6288852653782	2.1922650927834	3.4097384513844	3.0123085213	8.8256401169874	9.0796398943249	TRUE	3.2110234863422	1.18674466034575	2.7561293186483	0.5642433389033	0.79391224039505	0.492662057699215	0.367885166505623	0.46939244769803	0.54901534378593	0.226051840217032	0.39935855578204	0.44348797836772	0.50989136649867	0.201294912492219	0.478500045982443
ENSMUSG00000029461.17	Fam168a	3.4870916176123	2.2748191818992	9.652127905827	15.195343241456	21.954386110634	9.2336746780309	TRUE	9.44290129192895	8.67932692875533	3.78330865426422	0.4664150860771	0.61435770953561	0.397464455963397	0.28023128013656	0.33386810701615	0.41888962178248	0.327291855562557	0.251719134152137	0.53483844622417	0.64914459780813	0.279436700656661	0.402192606647897
ENSMUSG00000025159.8	Mms19	19.216737679465	16.399191688417	16.015806284838	15.349861935004	17.668164603161	17.889875868849	TRUE	17.033678145789	1.38924778262735	0.409866369230958	0.58959788717152	0.64921102270115	0.138956140517467	0.263738762376379	0.50932258344359	0.58598706357099	0.202289127644562	0.0941772486009338	0.39435553999449	0.33504855630891	-0.235126719416866	0.0500935548348708
ENSMUSG00000001855.15	Nup214	12.160313016704	8.6705730139657	8.2474656788639	11.782910716662	14.475069764617	12.535037061615	TRUE	11.971611866683	2.27348043674157	0.962642068779171	0.57096870017066	0.66911673049213	0.228846256691879	0.41515848317651	0.41589361289424	0.4883472766948	0.231692922540152	0.258119969879959	0.32520868559269	0.33230267760303	0.0311321288464143	0.84436283419146
ENSMUSG00000068966.10	Zbtb34	8.6990140555739	6.3103995390764	2.218399418105	3.0312681332583	1.7131216293442	1.0466047548024	TRUE	2.62483377568165	1.84579338725774	3.7337352114486	0.40896273711048	0.54566726906574	0.416052111552254	0.574746230675661	0.28771993452305	0.33914823908416	0.23725082120915	0.467689228944323	0.5048806129655	0.47345776749465	-0.0927065372375561	0.52579454256006
ENSMUSG00000037692.14	Ahdc1	5.0085232441183	3.9005585556755	5.0899942204297	7.0423401075699	15.0497291324	13.369681093427	TRUE	6.0661671639998	2.38939709915896	2.65675248083254	0.59799385612866	0.63137453600113	0.078365414364615	0.390285983019925	0.52650325724112	0.51085858327834	-0.0435184793982602	0.599122078295453	0.42219405774524	0.39693454867826	-0.0890051351836685	0.308175930554369
ENSMUSG00000026771.14	Spopl	2.7548128439739	2.2750706074233	4.823971297032	6.4950251361561	2.7012525701029	2.3504063065618	TRUE	2.7280327070384	0.615715255117977	1.78766865858106	0.55353925711124	0.46042332407481	-0.265724717636405	0.428485772115425	0.26493047446578	0.27324217740932	0.0445663900738653	0.675787528968253	0.28278643487931	0.17704852189987	-0.675568117110051	0.0785539100450137
ENSMUSG00000025583.15	Rptor	7.7458370250691	7.6182929702913	11.882835961034	15.042907829093	27.367660580153	24.022291562345	TRUE	13.4628718950635	8.57062430606048	2.64644803077771	0.58912812285615	0.67899630522611	0.204822300320414	0.258730035634009	0.66198566158127	0.66420801229363	0.00483515706051004	0.874389227972143	0.47886122773238	0.41943335294782	-0.191166040921568	0.151534527991879
ENSMUSG00000035898.13	Uba6	1.4404718091498	1.2048240406068	10.488677354662	20.24832008343	2.4276364063639	1.2990396320098	TRUE	1.93405410775685	1.01131447964962	5.43235678723613	0.63058222431001	0.7886139083266	0.322634652657862	0.0356555664333658	0.35804964013349	0.47327655951264	0.402523852779951	0.16514137111819	0.30079979555354	0.41635819623674	0.469021638023827	0.397715856605032
ENSMUSG00000054843.9	Atrnl1	4.4041148499034	5.491467054937	15.331788255632	23.317666115025	25.074118371164	17.17166428578	TRUE	16.251726270706	11.7780204706632	3.29864497246007	0.66643003976576	0.46922508157904	-0.506173300498086	0.23163221219711	0.46650168814498	0.48825830128327	0.0657622709579724	0.487523431403714	0.41972988676002	0.36999432140336	-0.181958064890251	0.356420349670703
ENSMUSG00000049878.13	Rlf	4.5929880528031	4.2773930086236	9.6193470834887	14.231554075657	4.8990057972942	2.7254116388397	TRUE	4.74599692504865	1.84523595591258	2.5277763001392	0.55249794899214	0.6943870595625	0.329770953423747	0.107521844263944	0.29659009429912	0.32654884454332	0.138828388872015	0.538009954577437	0.34765457215282	0.33730712637267	-0.0435917642897616	0.681914852729387
ENSMUSG00000021540.16	Smad5	4.4374923291757	4.3193099660879	18.117025918819	21.789620297036	46.60325221445	21.843753909337	TRUE	19.9533231079275	12.9032617093736	4.15698183013525	0.53573367295464	0.57706114577127	0.107208217939733	0.796560140126682	0.39803591132509	0.40321130897927	0.0186375045816664	0.867783330194497	0.51375788384422	0.57845582683627	0.171118165903274	0.6322399854517
ENSMUSG00000040860.16	Crocc	3.7337540916224	6.430480512871	3.2573580510143	2.5859426728052	9.2282178396084	8.7931102868052	TRUE	5.0821173022467	3.20310828574356	2.80886295336256	0.6197799614028	0.70000868528456	0.175616711495251	0.500919874681037	0.78401331951851	0.70922296454102	-0.144638913082746	0.0249252666145061	0.64335156072307	0.58106878803299	-0.146898353835507	0.336390678066447
ENSMUSG00000036391.16	Sec24a	3.2815550039092	1.9496216101599	5.5018770082699	8.7388655824112	2.942970998695	1.4727097284702	TRUE	3.1122630013021	2.077266904404	2.92702811089407	0.53118145894964	0.53038700897382	-0.00215935060046374	0.916785745271879	0.24984624548191	0.30547248479193	0.290001897803067	0.281407303524343	0.21976811249444	0.31591574974814	0.523557791395872	0.53275852256171
ENSMUSG00000003228.9	Grk5	2.0197253664462	1.4957017343703	4.1115778104056	6.7924668614827	2.3155484032332	1.6634391449361	TRUE	2.1676368848397	0.871867311633505	2.55482332217772	0.4769742941335	0.52491202021624	0.138164118621736	0.947017740778364	0.19573980829056	0.21845478351038	0.158397505111833	0.315000099093177	0.49470869169503	0.54022615068666	0.126984231078374	0.51733495970977
ENSMUSG00000034235.17	Usp54	5.7385847713314	4.1292379169733	2.7513565798955	3.3424712552208	6.5815010384204	3.5220303683283	TRUE	3.8256341426508	1.15453060572236	1.57172617678587	0.52896085237734	0.6931216710467	0.389947671725527	0.444514596334483	0.27783386101671	0.31823648243521	0.195876796254422	0.426796512316314	0.34645948065014	0.33718717743696	-0.0391369607615318	0.779779381628858
ENSMUSG00000035064.17	Eef2k	3.4263198180784	5.3634212499353	23.908979538103	24.733672863771	24.215292724581	16.852775918109	TRUE	20.380877728106	6.06917887095538	3.83379985833571	0.60033748130457	0.66441197795418	0.146304338699271	0.535743081428948	0.77546444785066	0.76355380452425	-0.0223308191539153	0.62810458977023	0.72153467260197	0.68950547749771	-0.0655067109066927	0.311211757530691
ENSMUSG00000028030.12	Tbck	2.1887010723347	1.6384290431481	6.1847036241719	8.3494996069315	8.3296000895826	4.5038061767154	TRUE	5.34425490044365	4.44082428962815	3.28212715376949	0.6153371084885	0.71358164375927	0.213701505457317	0.588274143418233	0.30049279459635	0.32686178152409	0.121350301623519	0.494036050277398	0.28788276481482	0.34592170473217	0.264964118810582	0.571510658142914
ENSMUSG00000000826.16	Dnajc5	36.566540626075	30.868553905361	252.32353845897	163.54202064103	111.81708612235	202.23902410861	TRUE	137.67955338169	122.813012005603	4.19149639553487	0.58987146123088	0.52199542194585	-0.176363457353349	0.575519626734153	0.40096405916663	0.42996473484492	0.100745411678835	0.729081087603143	0.6921427669673	0.4312212503492	-0.682641375438223	0.0752193817907515
ENSMUSG00000019979.12	Apaf1	3.2394493654724	4.3330873424287	21.080674675209	25.095336678596	17.160694119394	10.482587317003	TRUE	13.8216407181985	12.41498648979	4.12226111459612	0.59801602837253	0.73817118817414	0.303771275440941	0.53607614284248	0.54293676880798	0.55087309615058	0.0209358159870106	0.848062423934191	0.43692404978149	0.44604809965404	0.0298167729435405	0.992291289010065
ENSMUSG00000033075.17	Senp1	13.318668072349	9.5871170106993	11.131358450373	12.509979903364	18.070555993047	11.959829582813	TRUE	12.2349047430885	1.62145262277081	0.858237327014682	0.57711874373611	0.61102544329517	0.0823642677749419	0.917393041755737	0.22914839265524	0.2472352685932	0.109602395115675	0.620437210342402	0.53556552530746	0.58520926436747	0.127889512307921	0.592050175380194
ENSMUSG00000036568.7	Bicral	19.498754642505	14.431182358538	3.0442625667503	4.0582879018041	4.0419221419712	2.7016566825871	TRUE	4.05010502188765	1.74523576591681	3.53665887065779	0.46277961697965	0.65643506484765	0.504326982795628	0.520881445270604	0.25242476933977	0.27330202463256	0.114642664816758	0.547482852298922	0.43925869216023	0.40639173416292	-0.112199776326658	0.449741512493772
ENSMUSG00000017146.12	Brca1	7.7356560579349	6.9547514095892	2.7732768163469	2.8544017620262	7.030894030003	3.1634512210691	TRUE	5.05910131532915	3.0960337182512	2.7150237924169	0.57133276312279	0.79845659209823	0.482882714241292	0.281990655105462	0.25887455735517	0.35522165395663	0.456466348004688	0.201417885485868	0.36069476956377	0.37873474013091	0.0704092583602013	0.992465020072085
ENSMUSG00000024588.9	Fech	5.9511015474843	7.029319028955	21.935747937638	22.629498666349	21.03346498097	18.011151878498	TRUE	19.522308429734	4.09244282961193	2.62882939169958	0.58315956492116	0.50017096695828	-0.221469372707438	0.423982917984981	0.59646029870558	0.59320731943281	-0.00788971421877637	0.713058917509999	0.65627075232506	0.65254096990807	-0.00822265429252435	0.885686664607614
ENSMUSG00000040720.15	Virma	2.6163979831151	2.2420311674053	17.341809193713	28.616040863836	17.194199908123	9.2312387824697	TRUE	13.2127193452963	10.9159473304162	5.05988581007762	0.68303254112042	0.84002887039331	0.298484598561907	0.311318649285759	0.40372447655334	0.4701580305918	0.219774704697825	0.338753913036664	0.40322525596861	0.39583879859291	-0.0266729779880203	0.80208955450436
ENSMUSG00000039542.16	Ncam1	2.6633769273407	2.0328577405729	57.665211762938	74.372647561982	94.186855226669	61.119704425451	TRUE	59.3924580941945	36.8979010467742	7.22351170131983	0.75131622185156	0.8491187997899	0.176546162465358	0.194811276375026	0.48007234267112	0.58928770606732	0.29572034483541	0.0723061581265028	0.42228051299538	0.47247767130963	0.162044478483354	0.423297723334501
ENSMUSG00000035107.13	Dcbld2	7.3266308118038	21.239733007984	80.305636286524	96.060069006376	23.798637625789	14.017080853438	TRUE	22.5191853168865	17.5648506933722	4.43277582038435	0.61826244190085	0.64531107125949	0.0617754095743205	0.853417703218962	0.66039376959716	0.65484326854994	-0.0121768588347531	0.698037585286669	0.73037083782068	0.74791147166341	0.0342383494794892	0.834204203905838
ENSMUSG00000009828.15	Ick	4.4497074479519	3.8472971329133	5.4450696381321	5.9164618524084	14.435902043346	8.3984807585205	TRUE	5.68076574527025	2.2717337981423	2.04058798273483	0.5807541965889	0.46837400681118	-0.310266660815426	0.20840469587309	0.32756767854426	0.3485360692878	0.08951495366298	0.475764606265842	0.60429226432554	0.61521471996539	0.0258435485187141	0.73129543330437
ENSMUSG00000038886.10	Man2a2	3.8341945075312	7.1811329781056	23.687252572214	23.832475461244	93.266551192075	69.017355831394	TRUE	23.759864016729	27.0607121260999	5.46051512805582	0.68329143323897	0.57057425797336	-0.260086379385688	0.574022694643802	0.51639236323637	0.56005416714044	0.117098702796165	0.452741571681937	0.74870544278223	0.77697723963639	0.0534740954114599	0.0463419963206941
ENSMUSG00000020231.15	Dip2a	1.1753384101286	1.4055475119276	32.00112932473	35.513597642015	21.594148105846	16.082644344844	TRUE	18.838396225345	22.1188608567516	6.82838547647817	0.66078620980541	0.64428965057805	-0.0364741584358008	0.877059579587653	0.68870525847719	0.69027558769274	0.00328577029538119	0.871502579156764	0.59159794488677	0.58826728406203	-0.00814523642309437	0.671183468226571
ENSMUSG00000037295.7	Ldlrap1	3.3620112487989	6.3568588242125	17.93430516563	19.560204727276	1.6106601881611	1.9187421486935	TRUE	4.8594350365057	4.58825243281304	5.36889348837598	0.46028943161775	0.63237841829869	0.458246814254695	0.389874997277162	0.7352977913031	0.68279761455516	-0.106870633220356	0.0802912063972232	0.70261211288122	0.62580124278661	-0.167023924877862	0.120103107052843
ENSMUSG00000045636.16	Mtus1	3.2376884437687	3.2595979338958	6.9523908234788	6.961495629256	2.729591002801	3.581265157945	TRUE	3.4204315459204	0.647587556239467	1.79458080971574	0.58852054840897	0.62319329462861	0.0825869221556112	0.426255825578739	0.2616938902415	0.20664428245945	-0.34073079519184	0.621866264055357	0.43820371675923	0.49990177426759	0.190042926450027	0.81914985767307
ENSMUSG00000066324.2	Impad1	6.6697377022527	24.329553671982	62.830737787591	85.004416777393	24.374618537983	12.279995986853	TRUE	24.3520861049825	22.056965275513	4.17944605127443	0.6246141601664	0.59665239834764	-0.0660745944802379	0.910357596091815	0.57892529411149	0.51680989403302	-0.163743501570224	0.0838161339998354	0.8031004172515	0.85600085581656	0.0920318497581054	0.546371866763539
ENSMUSG00000025245.14	Lztfl1	2.205113024086	1.4076963385778	15.039206039358	5.5967895964325	1.9933900013839	1.1264779048429	TRUE	2.09925151273495	1.23376692613307	4.07274529962361	0.45521860184237	0.72079577050016	0.663031033229628	0.0484623635311714	0.19669445121909	0.23117809915441	0.233048469881853	0.456076114984054	0.39058282193003	0.53450571769388	0.452576880754922	0.381377178760216
ENSMUSG00000047749.2	Zc3hav1l	2.1624218614644	3.3533421508933	2.9503875043553	2.9876502974103	2.210096767955	1.1647617167344	TRUE	2.58024213615515	0.611741839566696	1.66959959154767	0.54616576562786	0.45755735513977	-0.255386289376766	0.711289183404365	0.45338338305056	0.4921122946896	0.118256044648567	0.238905042321288	0.492071146253	0.57012152601504	0.212402551038371	0.355742954619735
ENSMUSG00000039621.13	Prex1	2.7325221284654	4.2837130045148	1.8619640519671	2.534171036048	106.06608448158	110.96057026849	TRUE	3.5081175664901	1.94228016333263	8.27133392378952	0.61884423797617	0.64484937094067	0.0593858723890366	0.734998401397138	0.7500212123496	0.659301031498	-0.185994060461887	0.247174523234393	0.54772545683397	0.5205547179243	-0.0734031147110919	0.334017883047888
ENSMUSG00000027860.15	Vangl1	23.013509317569	19.271055499952	10.477533777331	10.771203709254	11.687038038991	10.050835035439	TRUE	11.2291208741225	1.43061480706762	1.51940073436795	0.53179622271251	0.5676565553295	0.0941448015862535	0.895558737877289	0.565956413211	0.56103400962117	-0.0126027200656953	0.904515086310556	0.47205593329885	0.54970046820479	0.219687895394459	0.002704761235581
ENSMUSG00000023025.16	Larp4	9.2431561212517	5.8945450917896	9.4698514959418	16.171662396583	8.0049400259162	4.321537680198	TRUE	8.62404807358395	2.65037463739803	1.9375595999216	0.59340823017635	0.74909156095143	0.336117132919461	0.196601742099359	0.25993281152957	0.35261244249408	0.439944625488549	0.122345473232381	0.24439908748472	0.34810801569474	0.510296136039391	0.347618779700792
ENSMUSG00000026556.15	Vangl2	7.0243656971571	16.579151687578	4.8797141060609	4.2702057377619	78.170822939899	45.940357774769	TRUE	11.8017586923675	10.7144518570783	6.00825287796628	0.58409395220796	0.56607355872769	-0.0452109099784479	0.769151148195619	0.7298041822699	0.68847042534961	-0.0841147367758722	0.32626388379457	0.78322060233217	0.79394808162208	0.0196259537772919	0.806696453854044
ENSMUSG00000055531.12	Cpsf6	28.207087496534	23.176291640848	25.571802905926	25.3719902487	24.402194965978	21.386686174873	TRUE	24.887092607339	1.77579250080232	0.414137873862866	0.54260987483435	0.56580981913979	0.0604019105360808	0.832036661916135	0.38882829922292	0.4346596479093	0.160752944483576	0.312846245485256	0.21679840675726	0.17487006751755	-0.310070789918463	0.167593438106973
ENSMUSG00000028901.13	Gmeb1	7.9635465821477	6.9931102732139	8.1266171260253	8.7235991197266	11.737306481481	8.0383429321687	TRUE	8.082480029097	0.563426946107239	0.619926164542101	0.53860983445777	0.56783252834076	0.0762249241557138	0.994703422609313	0.38147656691188	0.38690990983719	0.0204032418077021	0.702699782802755	0.52484742095157	0.51057075081281	-0.0397871839545515	0.74928783805318
ENSMUSG00000028034.15	Fubp1	18.409132555889	13.227206592221	22.490085461587	28.172731650954	51.47255835105	40.777599714209	TRUE	25.3314085562705	14.1043281150327	2.37933901364636	0.61734629140725	0.61152523863859	-0.0136679328472432	0.727954036938366	0.43375019337496	0.52509429974552	0.275712133443938	0.0207994574732671	0.43356768874202	0.47986097375405	0.146359240889519	0.700947466245246
ENSMUSG00000027624.19	Epb41l1	6.5709300236131	5.1665815077701	35.91032593337	39.753373442298	4.4168813327618	4.3650102218511	TRUE	5.8687557656916	2.19100108877982	4.54510931710277	0.54462121745141	0.72083573474972	0.404417344916694	0.555991834240688	0.38015284981125	0.36418584336908	-0.0619047632907591	0.738265384908612	0.30183943197001	0.34669301910238	0.199877496932904	0.198131797477802
ENSMUSG00000024597.11	Slc12a2	3.6317539543384	7.463984563023	8.3737054831619	15.111327170427	27.862527329607	15.183749597103	TRUE	11.7425163267945	5.7226618197635	3.33805142988772	0.62592904680982	0.83161677656393	0.409919735181217	0.336408483398849	0.6204742193866	0.62787163447046	0.0170983689240826	0.945747806644011	0.58362752043551	0.62827457535515	0.106347285275025	0.852429955731838
ENSMUSG00000047126.17	Cltc	14.003408552604	9.8593428978633	82.595374462462	147.44951653243	73.941411207138	37.402402110416	TRUE	55.671906658777	50.8472243289777	5.16125735417226	0.59541446213933	0.79442782054421	0.416021882447689	0.366712285858037	0.4070085746921	0.51028860958545	0.326254250016183	0.240533157920732	0.38285155703727	0.49706817067977	0.376658599851817	0.585055432875019
ENSMUSG00000073639.6	Rab18	5.7917911218161	7.9747989144079	22.948573003266	29.63149959466	10.667844543966	5.8801233319843	TRUE	9.32132172918695	5.16740141109034	3.28502199950303	0.59830361412216	0.54274770815914	-0.140596048947601	0.754845551518463	0.55934892530303	0.58161518360865	0.0563164067191446	0.531637476803497	0.7696861818611	0.81056911758359	0.074664863323659	0.404338760680014
ENSMUSG00000037509.21	Arhgef4	3.5460432567174	2.2616498005864	1.4489486432352	1.6292068541231	85.756188276219	65.141867646091	TRUE	2.9038465286519	2.0234061931876	8.21888205607932	0.53362637965884	0.46459032341236	-0.199870881783192	0.496658249854566	0.24950611526095	0.28189045095525	0.176059431735391	0.382330977060234	0.42372567572289	0.4221709055894	-0.00530339461530952	0.687218436612411
ENSMUSG00000074102.4	Rbm15b	28.992945836288	26.693272801096	55.279116564419	53.015532768402	59.973737724875	63.387509155155	TRUE	54.1473246664105	11.168868761746	1.63351971185897	0.53478412857428	0.5348389237929	0.000147814297871926	0.780060010306229	0.49385541605812	0.48382120725974	-0.0296147238264443	0.509282529207638	0.57792645845382	0.6036664805836	0.0628657752845076	0.170920042817656
ENSMUSG00000036606.17	Plxnb2	17.634558501737	37.438098938419	160.40252838941	250.16045867517	251.74968704833	237.66831817464	TRUE	199.035423282025	76.9760724669002	4.95117805526207	0.6611764857278	0.81261380322752	0.297534453578015	0.281389155944493	0.79468719538612	0.79643216138326	0.00316438209259042	0.887673641174311	0.70888480543319	0.63250707263516	-0.164469594988754	0.161303137930459
ENSMUSG00000041779.5	Tram2	2.3761017384832	3.7480883665211	9.6694144822267	16.926439615647	2.0851623666681	1.3233587493176	TRUE	3.06209505250215	2.01312542155949	4.53860961488692	0.52698142368683	0.53586677000322	0.0241222477230056	0.712313967137056	0.50144747499217	0.57454221084841	0.196314298548913	0.17150360323326	0.54222853088889	0.60205664921806	0.150998213985025	0.203472752356894
ENSMUSG00000002748.7	Baz1b	12.07140917397	15.434125668094	23.462273377483	29.397078074195	42.005641009912	27.385520025913	TRUE	25.423896701698	10.3507366186427	2.04589907904802	0.56042590785767	0.72378004329447	0.369027677516112	0.497728040181294	0.35120770072633	0.37824426783188	0.106993740683924	0.612681048227081	0.32827734290468	0.39214700883589	0.256479414871332	0.467258729148394
ENSMUSG00000040850.17	Psme4	15.392199131826	16.203910210718	18.332724970948	29.245894616837	9.2718253810558	4.7148974657876	TRUE	15.798054671272	6.71684486598709	2.55811123201408	0.57094319767671	0.78028073748869	0.45064606408709	0.181076790865051	0.45238400157221	0.46630929780831	0.0437392863269185	0.808901931150038	0.41907825820087	0.40817192868771	-0.0380427093777488	0.767294158394884
ENSMUSG00000062604.11	Srpk2	5.3297876117591	4.9486109254318	11.400761272531	16.159828257562	16.656784642695	9.6417533591082	TRUE	10.5212573158196	7.97943926081452	2.49050489478114	0.55616101947702	0.6059428733557	0.12367915493363	0.774265981413836	0.28731797735614	0.31783512551919	0.145630308332863	0.379979955831188	0.45663849305908	0.46774325029343	0.0346643560645015	0.978034037313488
ENSMUSG00000002052.6	Supt6	7.3602961028824	5.490658803012	19.350751793655	28.558388087061	34.634132195212	23.057603079864	TRUE	21.2041774367595	15.4073018175093	3.37290625518899	0.70880578604984	0.87767170377436	0.308291014647546	0.458636762774559	0.36245133282367	0.39476578008485	0.123209642356127	0.658430057261959	0.35809189508159	0.37224393656341	0.055918483506801	0.671589208381775
ENSMUSG00000042308.14	Setd1a	2.3779331719182	2.5735613411451	2.0883971768852	2.3371255583161	2.5474849077465	1.8899497572909	TRUE	2.35752936511715	0.300958547580656	0.524760036092222	0.49918054365671	0.57905481503456	0.214138220443563	0.370670609556498	0.48663044814779	0.46269744519228	-0.0727574585720239	0.389657710594941	0.48786978283656	0.41017132109281	-0.250269506846995	0.0681017249168756
ENSMUSG00000024811.11	Tnks2	24.672027946652	60.215600006319	51.05930610976	60.952520165489	41.290282087603	22.874939122769	TRUE	46.1747940986815	21.3631777526561	2.0846752285297	0.59396870837082	0.68577462618646	0.207347596668276	0.712586233392394	0.63436080471131	0.585802346579	-0.114889661603915	0.265030630253746	0.67467442688322	0.63582652331791	-0.0855582790763539	0.461507710618302
ENSMUSG00000032462.14	Pik3cb	3.6553003677503	3.7561885883691	5.5705161546936	8.6406555217927	2.1348996630089	1.0902367581552	TRUE	3.7057444780597	2.54682250528587	3.05637813597114	0.58278790883091	0.66792040493123	0.196705243197417	0.694283715367434	0.42160700350669	0.43017250268949	0.0290164759057146	0.97051362313546	0.47215254963108	0.4070431236591	-0.214071413885209	0.18195219524605
ENSMUSG00000054008.9	Ndst1	6.7895779659325	14.181243020356	92.18042403449	104.68018423043	91.642377271662	86.997117589069	TRUE	89.3197474303655	13.5073113665253	4.65936747490176	0.55721888341153	0.62287144215386	0.160690278452074	0.546636805483085	0.60105843223113	0.58965623723938	-0.0276311251193161	0.597429546770518	0.79048373936194	0.80124769045584	0.0195125073185076	0.868891067970617
ENSMUSG00000024130.16	Abca3	1.7427079246205	3.0860605306463	15.139898526857	16.393910381959	49.393850614421	34.520662904348	TRUE	15.766904454408	19.796446488216	5.83862485616563	0.75287295334883	0.66778164299551	-0.173029996976799	0.531947847934777	0.71887102512744	0.71809189330029	-0.00156447980524196	0.861234067603608	0.69871799242658	0.66737516270356	-0.0662122954370407	0.220430889006805
ENSMUSG00000037905.13	Bri3bp	36.26756879264	52.664571295241	32.367889582108	24.152563914563	64.381637244602	48.923788942022	TRUE	42.595678867331	15.0459301539455	1.76655384412099	0.52378807108209	0.52545261022701	0.00457745191757343	0.930700028993367	0.49752567899937	0.50126716235397	0.0108087373204446	0.83741128249938	0.62751442192557	0.65525346626408	0.0624044640152492	0.420525151997903
ENSMUSG00000021408.15	Ripk1	1.8537901284788	1.567306950604	14.696663823897	17.622164563026	10.426339040366	7.3174993653924	TRUE	8.8719192028792	9.52042227041351	4.84425343901128	0.59373724091087	0.79996100068462	0.430105062201722	0.392944322991417	0.53922277922182	0.58408358684869	0.115293400819088	0.344709268812365	0.4380472837087	0.46560487483197	0.0880195575351956	0.674651680588495
ENSMUSG00000029174.18	Tbc1d1	7.7300732304375	13.907333428918	42.443331934648	44.649507540249	54.204512729273	50.918578080436	TRUE	43.5464197374485	13.3658253144961	3.29613085043454	0.68830444961276	0.51104888190843	-0.429585544651225	0.448849094911077	0.56174536255009	0.57428293316985	0.0318453782359922	0.954400241238403	0.63446499393424	0.64168131171372	0.0163164000841906	0.899960961691144
ENSMUSG00000037007.17	Zfp113	1.7769282246787	1.1431812546716	1.867518576603	2.4963597864895	6.5348927463425	2.9723240058734	TRUE	2.18193918154625	0.886146892599631	2.54802196787631	0.491858536079	0.59207272840556	0.267530962719233	0.219447873759	0.22729846597208	0.25071959152777	0.141486786987405	0.434626042664396	0.26398114177841	0.41059408174762	0.637277962406255	0.100596029294831
ENSMUSG00000031652.11	N4bp1	12.098023467382	13.356287814178	12.4834929932	16.017920359577	26.528609476291	16.305410172448	TRUE	14.6871040868775	2.83318720497654	1.23399226484636	0.57726594182511	0.62282579486047	0.109592585959598	0.614719905477825	0.31587551422072	0.31735167572489	0.00672635279473062	0.905525586544069	0.44125253121864	0.41251529195985	-0.0971569532232147	0.599170027839153
ENSMUSG00000018481.9	Appbp2	9.3348972358108	10.90701774679	17.493115061459	23.708262603686	19.390165148875	10.402575050122	TRUE	14.2000664041245	6.421630245193	2.02717742837606	0.5572358463162	0.72776466319806	0.385183934675766	0.457336398204531	0.52373139022491	0.55178576413736	0.075281159824706	0.499555477166452	0.52016543796379	0.6346397211447	0.286967276610395	0.351268192086737
ENSMUSG00000047767.17	Atg16l2	1.1063478175339	1.2432819909033	2.1982288548523	1.893454046666	4.5454705748272	5.4340845049193	TRUE	2.04584145075915	1.29138395790102	3.03725260617143	0.50622763795544	0.57917476382284	0.194212466911282	0.348360690260233	0.59988016831379	0.65656289169006	0.1302588748188	0.462346721402043	0.6245410124736	0.54521121109114	-0.195981085750173	0.0561529309095887
ENSMUSG00000034557.14	Zfyve9	3.13125009612	3.4166884787606	9.1267438701462	12.675188246277	8.37419030053	4.5347151182166	TRUE	6.4544527093733	4.23286406163415	2.99414340332387	0.61531262884967	0.69805488788145	0.182020876523571	0.580730326106771	0.24681308812662	0.23575896016768	-0.0661062979872017	0.852252836942728	0.31377451345392	0.45976575191567	0.551170830097058	0.29925339130547
ENSMUSG00000042104.18	Uggt2	4.2722419482837	3.6474082137329	2.9239316796884	7.0137321422603	2.2556373680885	1.662238660828	TRUE	3.28566994671065	1.4949089752987	2.29949849423198	0.54880589307097	0.64442064725241	0.2317067455318	0.232231217340404	0.33131208811704	0.5202869290683	0.651116621639931	0.0927527966597023	0.25634227530589	0.19854247192113	-0.368623764151473	0.452735245721211
ENSMUSG00000026883.17	Dab2ip	14.857123436395	18.380172990822	41.288025540069	55.936915903905	41.633623756274	50.149599646075	TRUE	41.4608246481715	17.1721153538211	2.33781869831866	0.49415245907982	0.68041777033677	0.461464600078277	0.307769303934959	0.56995317537158	0.53751027763229	-0.0845510587529263	0.264502454801451	0.57187982697904	0.57355498768204	0.00421979100157561	0.679771800322995
ENSMUSG00000039473.8	Ubn1	2.1078569406599	3.2504377172064	13.430740715294	16.440981328827	20.054224787966	16.37866599699	TRUE	14.904703356142	4.95618309856252	4.07218896199622	0.635144777422	0.61461598471729	-0.0474001944793276	0.938332393857519	0.51136223583925	0.50858990633136	-0.00784279127860562	0.94783296607356	0.55712280098237	0.52218546828339	-0.0934330514380842	0.348497549477756
ENSMUSG00000044847.13	Lsm11	4.4009021783211	3.7613840137959	11.795731660138	10.350064419322	8.9858785145221	8.4287673619284	TRUE	8.70732293822525	3.50720164549094	2.06213769744397	0.54749872230953	0.48267202494613	-0.181812385475253	0.647868787515419	0.61629799059749	0.59334684678382	-0.0547523942404577	0.436741600225839	0.62555662159406	0.66534855903088	0.0889698552387024	0.311817739174585
ENSMUSG00000025224.16	Gbf1	3.4177023728857	2.9580850356604	13.800676155394	21.577886744278	23.872033730518	19.804254800066	TRUE	16.80246547773	8.78069073068378	4.29204526514907	0.60960710434241	0.73567682647571	0.27119243170684	0.319490383442634	0.44861403743181	0.53656968347782	0.258290779711909	0.239671120256587	0.37334736321726	0.36750345378527	-0.0227607335638576	0.58422100088721
ENSMUSG00000025332.14	Kdm5c	8.1121685950612	11.497125613358	38.689520706669	36.37934442835	57.642522351161	51.362509973502	TRUE	37.5344325675095	25.1568807376831	3.51927439925888	0.64841401004093	0.77451937145128	0.256386059644881	0.373095169429434	0.67935614318473	0.6749081950812	-0.0094768141847416	0.712605794485491	0.50304459935822	0.47956108394084	-0.0689717236210844	0.420673215066216
ENSMUSG00000019951.10	Uhrf1bp1l	4.2039327786918	6.1661493133413	19.306749402264	28.882895017781	6.3708796131091	2.6647782259831	TRUE	6.2685144632252	4.20192407541218	3.94022599892552	0.5560667372105	0.59567164595219	0.0992592476251423	0.65295960933725	0.39761950120016	0.42279337561583	0.0885642571168601	0.498934095755017	0.54513018895426	0.45004664269131	-0.276526288368359	0.242283904914919
ENSMUSG00000035173.14	Ccdc186	1.5137929541634	1.737817949859	3.945207567863	5.789931882097	2.3685972205633	1.0294057658002	TRUE	2.05320758521115	1.15881235472503	2.99468960969408	0.54703187159189	0.64766056802425	0.243613019259024	0.210048941555739	0.38742872517437	0.41091670761098	0.0849150669394364	0.544870988909187	0.36413498581354	0.43744779677006	0.264637501406324	0.457401207899736
ENSMUSG00000024805.16	Pcgf5	2.1117827955858	1.9960653629796	4.7736044098232	5.6976057178711	2.0009717573755	1.2242817028091	TRUE	2.05637727648065	0.661541670241049	2.4635150431268	0.56445557056339	0.43860844272869	-0.363926445463385	0.264597204081554	0.31809423437993	0.32048450991684	0.0108004057437607	0.846858261128572	0.48023309868845	0.62113382380984	0.371169291195209	0.108719292053369
ENSMUSG00000030447.15	Cyfip1	11.812657913357	9.6521435009482	51.776041565935	74.76254948793	63.110020040076	49.449839706203	TRUE	50.612940636069	27.166190004075	3.7688136689594	0.66161504161004	0.81156221154975	0.294709656919535	0.395937864063753	0.425905496598	0.50627456758116	0.249386664130086	0.26180186783477	0.3771679011703	0.4373654221286	0.213632265366303	0.409342308442586
ENSMUSG00000041058.15	Wwp1	5.3392394866614	3.3095742164495	6.3235502205346	10.882599675651	2.7435182816066	1.6806109116739	TRUE	4.32440685155545	2.65387767632733	3.18131112054047	0.54544265366767	0.51695766543354	-0.0773813829948849	0.873302280887127	0.15163363396827	0.16433004600011	0.116006491584386	0.551748417914655	0.43568465624809	0.52678619603179	0.273933235593119	0.527955983120475
ENSMUSG00000024290.9	Rock1	2.7883604987856	2.9579905532289	7.5743623520689	12.882085107837	3.4032366080295	1.6616209578697	TRUE	3.1806135806292	1.41680644082228	3.18757612160611	0.55391821233898	0.67476889047887	0.284720487384441	0.30873483485604	0.3637318678688	0.40089397340613	0.140345398701332	0.407583423455099	0.23842618877455	0.37098477100825	0.637817254789059	0.162873876211737
ENSMUSG00000024431.15	Nr3c1	1.3889011577061	1.4072086955503	17.952092052368	26.449186032012	6.888097824235	3.059282738094	TRUE	4.9736902811645	5.30123697663552	6.30442552676026	0.53236822111749	0.70914406395061	0.413654289039058	0.392559835250136	0.45065024765238	0.43800286376813	-0.0410678809738989	0.716760281648587	0.5501033344805	0.63629652177647	0.209996587343834	0.767682356299987
ENSMUSG00000069769.13	Msi2	5.2114521315699	5.8962044343556	10.436233795232	10.141838463053	63.276716232018	31.590419578144	TRUE	10.2890361291425	7.0204191527461	4.20381844154304	0.64001290960735	0.56138628642122	-0.189107183760485	0.48441996478171	0.28581395980366	0.2674505525667	-0.0958041982908486	0.538247054568322	0.66487066335337	0.72491952340372	0.124747122075587	0.469475064122787
ENSMUSG00000030002.15	Dusp11	13.124901855745	10.405579733228	21.659656719	22.592578857076	42.782964139264	23.038458501114	TRUE	22.126117788038	7.34891954121204	2.01862150196431	0.56433291307122	0.45312758048717	-0.316629187066785	0.362596645731182	0.31696859031072	0.376361285455	0.247778347323478	0.197981134198564	0.45999954149916	0.4731770008846	0.0407475289548645	0.993872121228936
ENSMUSG00000030275.6	Etnk1	16.871336666397	30.81347067232	16.018963073841	18.731400502493	14.206210223284	7.3428510166828	TRUE	16.445149870119	3.35452355397763	1.7625897571572	0.60894483027656	0.59061731603236	-0.0440878726963386	0.768772401751336	0.50989040836433	0.52905798551293	0.0532386530092243	0.672621002409319	0.50038906741391	0.55616697322413	0.152467806295978	0.77289666854397
ENSMUSG00000028619.15	Tceanc2	3.9977329824893	3.4832022039624	6.4399431018068	7.7482405161672	6.5836350886874	5.5100394805079	TRUE	5.97499129115735	1.76569729760883	1.4543212515565	0.47791950250263	0.51398184988932	0.104949773827248	0.937738734342762	0.54141347336667	0.56212271010027	0.0541543116048456	0.354540595847445	0.54636166429122	0.50978354889861	-0.0999714425918132	0.31833403916625
ENSMUSG00000001150.7	Mcm3ap	10.634433857249	12.978541071357	12.406821481564	14.867638118222	26.063714275128	23.928169113546	TRUE	13.9230895947895	3.56189005057284	1.68914642986313	0.64877916411017	0.82961224574952	0.354709702280698	0.342162066325046	0.48598425576314	0.55760212435419	0.198326481424575	0.179836002577578	0.40567612800499	0.4343611256268	0.0985665811490729	0.399323053871969
ENSMUSG00000040351.11	Ankib1	6.122316526467	5.4402784524132	24.266707753776	31.325360672497	22.844066637729	14.482839278229	TRUE	18.663452957979	13.4504372168042	3.58348955371105	0.5305786391386	0.5795923337074	0.127471917960656	0.432800140188435	0.26978394389543	0.25102426851434	-0.103977641577211	0.732462050181822	0.25715592173799	0.20058587406479	-0.358423366115291	0.234316123530188
ENSMUSG00000029436.9	Mmp17	3.6707507373671	13.632672052958	4.2254045396058	6.355221577916	5.1602259378498	4.9179012566835	TRUE	5.03906359726665	1.57883337049935	1.7683333315778	0.70328789217692	0.56426318622598	-0.317747151995258	0.798617392557398	0.86402273174292	0.83108534853237	-0.0560726264766805	0.167143819311162	0.84223231560987	0.83785288851392	-0.00752127576376347	0.611574398403839
ENSMUSG00000020170.4	Frs2	5.0108624312923	5.5864344005706	11.09593438475	17.346123080759	6.3028223188389	3.5050367071425	TRUE	5.94462835970475	2.50066997477655	2.51479505171682	0.49495305841354	0.44473490342393	-0.154346071908605	0.836162684115661	0.41417617692222	0.45226891775843	0.126936276671265	0.289370146243687	0.53629976838627	0.53860248859305	0.00618126547482581	0.811849355796573
ENSMUSG00000038759.15	Nup205	14.751138481831	17.764237968336	35.683262943458	40.72865457374	59.560812929284	48.497564009649	TRUE	38.205958758599	22.7826145944253	2.53225396282332	0.68329544917776	0.74824511747808	0.131001441401715	0.36570348401783	0.47071423553209	0.52883786346164	0.167973989622493	0.360366069074742	0.46002709063579	0.47952413090632	0.0598845943969407	0.677278739188087
ENSMUSG00000039844.19	Rapgef1	32.588043392176	33.669435319675	98.835113211536	92.433857583093	63.475465147075	68.645449786147	TRUE	66.060457466611	43.5620662238718	2.19771175116703	0.51527773673901	0.58551526341162	0.184356519606634	0.4823310461899	0.43340955572131	0.41455126567978	-0.0641804376911464	0.430744744207865	0.61822036517556	0.57679256352199	-0.100068615376677	0.0783811650473889
ENSMUSG00000087598.9	Zfp111	4.3577034768608	2.4521157375674	2.6816959927518	3.053342224597	3.9955354440404	2.8033170324522	TRUE	2.9283296285246	0.535846871564949	1.05915557766887	0.52689536090466	0.60887599869696	0.208631966984778	0.693389997896152	0.28514073149974	0.37899891798117	0.410519590932265	0.000681362200480926	0.28150284081714	0.43067629831293	0.613454447499858	0.0825833680535717
ENSMUSG00000038902.14	Pogz	7.3514061453085	4.156397635036	3.6238941788854	4.7574862418452	9.3501815016968	5.1362498119492	TRUE	4.9468680268972	1.56669621501785	1.59469320490823	0.54803375291946	0.61491374431288	0.166119303489551	0.345207825300004	0.28003965949889	0.37232446911354	0.410929275461858	0.0627476219823503	0.26101300711169	0.29276339743391	0.165613490136822	0.631891062504466
ENSMUSG00000061411.12	Nol4l	5.2333440608418	3.0948885909008	1.1380299263517	1.6332140684157	10.563598787666	5.0789149303274	TRUE	4.0869017606141	2.66877636338547	3.88796169428154	0.44290973437109	0.5421421886992	0.291658574223506	0.368621101251388	0.45385550339513	0.45280701963602	-0.0033367277362576	0.981790027815006	0.53509548593418	0.53508032293384	-4.088222741661e-05	0.580500414138797
ENSMUSG00000052040.10	Klf13	9.1234823452783	8.4582952547916	31.847980466243	34.34202697023	38.096268530232	23.843377457241	TRUE	27.845678961742	12.4145048258138	3.11995447296117	0.55071782274475	0.60712535398207	0.140681123579703	0.507293846128616	0.57418533992396	0.55849984063692	-0.0399596271378396	0.678674527824995	0.61268042701449	0.64613489108995	0.0767006192262031	0.37639622389258
ENSMUSG00000043895.6	S1pr2	9.485121125397	23.758624370802	53.968257755772	45.889052175165	6.4613444622112	6.4121833223116	TRUE	16.6218727480995	15.1004423896656	5.00880660869589	0.66701097039371	0.53434717267025	-0.319933104493348	0.625598293616109	0.63710905825523	0.60393658772077	-0.0771432724014647	0.0819690794177514	0.74668700346131	0.76326385114246	0.0316782453426922	0.507179772969979
ENSMUSG00000039414.10	Heatr5b	1.5107891425593	1.5028495420218	8.0372450399235	13.081882503811	12.012876289643	7.4472249017209	TRUE	7.7422349708222	7.12410712584646	4.3134571318584	0.66554887358812	0.80175748193133	0.268621299650678	0.257887687734177	0.4309231440188	0.55453555744688	0.363849385800386	0.207921455526936	0.39498634664847	0.40454049613629	0.0344813444511547	0.845801458377257
ENSMUSG00000000305.12	Cdh4	2.0391525585364	3.4499376279116	1.8086985668291	1.7942494870974	109.04701065673	83.398389403912	TRUE	2.744545093224	1.39819716283819	8.46403553582702	0.39914773255743	0.85621641214708	1.10105267412784	0.361016452298418	0.55169231620203	0.5688422809296	0.044164814426039	0.553887313331941	0.65665284101085	0.64827834783789	-0.0185174601427506	0.566189724539257
ENSMUSG00000060798.7	Intu	1.7215784430606	2.8785492694629	1.5605652431113	1.8071902357227	2.7983970387257	2.1780320431009	TRUE	1.9926111394118	0.521192160732705	1.28469200142087	0.55548705862059	0.48133224468537	-0.206720227631641	0.753955170189787	0.56557244578207	0.5430784078555	-0.0585513303778511	0.338900470263975	0.68836356952804	0.65461139081268	-0.0725320404545447	0.405619540235325
ENSMUSG00000035614.11	Togaram1	5.2770306512928	6.5569343841981	7.5747046262019	11.563397027622	3.3540140417089	2.2262494386992	TRUE	5.91698251774545	3.12879793028466	2.67934249591972	0.49705383459253	0.6980679924481	0.489965448316238	0.187295741768733	0.44683498948369	0.42607877254504	-0.0686219831784177	0.79267451029697	0.34700005434278	0.41237340772247	0.249015413451964	0.660518248975777
ENSMUSG00000027284.16	Cdan1	5.4108574740712	4.5255602404372	4.0466310431195	5.0441451671673	8.183420704257	6.4605405338125	TRUE	5.22750132061925	1.39572805944952	1.13037653761688	0.61595060201389	0.6455882896518	0.0677997554080253	0.66018317992502	0.51562258279731	0.58617138433312	0.185007089369566	0.212673035118891	0.47490725936755	0.4618119954209	-0.0403401620569926	0.908860439111002
ENSMUSG00000090290.2	Tarbp1	1.9746527269736	2.4073887611686	3.6903408545583	3.5501397357374	6.3806712558753	4.3731635274079	TRUE	3.62024029514785	1.45722883421319	1.80855662531545	0.68589829731323	0.61623503881108	-0.154513958683759	0.484854400931887	0.57941507361383	0.59734497471305	0.0439671307181397	0.957433046267296	0.57914821827112	0.57197304961449	-0.0179854453095973	0.886835590608105
ENSMUSG00000011256.16	Adam19	10.290501972576	20.403683920789	74.329456037753	98.31131830196	48.066193323936	34.602117548735	TRUE	41.3341554363355	38.5284188471595	3.87837388880055	0.63464682839235	0.57516789304805	-0.141970832577258	0.983711711841857	0.54040667973785	0.56710419216432	0.0695683137589258	0.318006247440013	0.58965356351125	0.58413072583778	-0.0135763093685343	0.879196744205459
ENSMUSG00000024019.18	Cmtr1	2.612065581893	2.1482680275397	1.7790833139036	1.7584781798792	2.7371714076415	2.2475116329205	TRUE	2.1978898302301	0.617489755260542	0.871681083655848	0.54906846554497	0.50883656489392	-0.109783709742471	0.704369744319968	0.31566937370129	0.3411243645181	0.111883504988436	0.658586459764756	0.12551126384426	0.11744229969602	-0.0958647190673731	0.552906286208636
ENSMUSG00000031600.10	Vps37a	3.6004205346628	4.2356856729281	10.4784663525	15.201337301381	4.9102263977083	2.693602445703	TRUE	4.5729560353182	2.11410538261759	2.946550410471	0.65138123300909	0.43782101794084	-0.573160940856856	0.351978310599253	0.46019617409319	0.47101989312561	0.0335390025659712	0.772221273215618	0.64122679783883	0.6843082048134	0.0938115261373068	0.612612740892007
ENSMUSG00000031365.13	Zfp275	4.1190655868396	4.5407081570548	30.665370764381	30.588182011103	28.055226133891	16.955622241108	TRUE	22.5054241874995	12.0407167720795	4.41861389051029	0.56080424246591	0.58001954829021	0.0486042606093446	0.909712708631547	0.57115439748033	0.5936601066578	0.0557563734849134	0.62022829316722	0.63880290131758	0.71265894324504	0.157840946939497	0.338859523006311
ENSMUSG00000032187.16	Smarca4	10.359698087383	11.174214025703	60.418309564695	74.571375319563	131.02548853882	128.93657421978	TRUE	67.494842442129	84.1047643552698	5.19364511222159	0.69252504564153	0.8020700900061	0.211862065936637	0.373145024626341	0.48316563829932	0.53322812760249	0.14223502716335	0.514330358771104	0.4316874218208	0.47733820800469	0.145024762665353	0.211074379242807
ENSMUSG00000020899.16	Pfas	17.985950707554	18.19506785244	17.58694666745	17.845161745484	40.311878498542	33.960789517963	TRUE	18.090509279997	0.555167092015579	1.48452302927446	0.63330351128396	0.76571982253619	0.273919527195863	0.38051066433237	0.55914205736027	0.59030015380397	0.0782338524811797	0.583551887363458	0.42257206260451	0.46824277816035	0.148059353641458	0.17978891636508
ENSMUSG00000024773.15	Atg2a	9.858749440831	9.1785759607364	10.721507480526	14.290764290184	12.923350659268	12.189219445456	TRUE	11.455363462991	2.27178888322735	0.841718021092336	0.54273242843183	0.77647265507875	0.516694005597677	0.318954534166097	0.58881789901179	0.62132700443172	0.0775312313788702	0.488533617091765	0.42689023615916	0.37502757065307	-0.186868504455667	0.0228462233373159
ENSMUSG00000038764.14	Ptpn3	2.0617963716195	1.8580958311133	2.318719092424	2.497860399221	2.4060622190364	1.699345936753	TRUE	2.19025773202175	0.388001723418764	0.761067641725967	0.639021763917	0.61778370116499	-0.0487632583733511	0.788431590190875	0.41854736264534	0.39033136620243	-0.100691487428476	0.447898550691977	0.49452696065871	0.51456416531189	0.0573018139675243	0.683101695184465
ENSMUSG00000021709.14	Erbin	3.1175354775693	3.1758270582803	15.91803850777	25.229342202551	7.3562016983542	4.0707495886062	TRUE	5.7134756434802	3.80552934119844	4.29456635526524	0.55566106178754	0.65502625672286	0.237347591938486	0.216732145370943	0.28536712665895	0.29417973578445	0.0438787209818133	0.831120783816812	0.35855274605456	0.3619227613944	0.0134964751095572	0.703242481578722
ENSMUSG00000038866.15	Zcchc2	2.70808549317	2.8065445652326	6.5355981454017	9.3835258409821	5.9907934076159	3.380020923345	TRUE	4.68540716548045	2.76434741897935	2.66036545321669	0.6023249068618	0.62901808416291	0.0625595776023892	0.746368256958374	0.38140411795603	0.37937497978339	-0.00769588578197516	0.963063061386796	0.37596644908989	0.3469973608566	-0.115679232630674	0.33316998688111
ENSMUSG00000027340.15	Slc23a2	8.3945408567176	9.6772795598708	8.6173252094365	11.231732839864	19.406348299071	10.799805154707	TRUE	10.2385423572889	1.93806037643591	1.21273424142007	0.68909524697392	0.75232715105629	0.126656750843347	0.602290935590375	0.54048274274875	0.59791952453387	0.145702767188521	0.259047586610069	0.51189434040237	0.58199427647996	0.185158909556725	0.0437329808787395
ENSMUSG00000038773.11	Kdm3b	23.082399273664	19.794095775866	12.186352462402	17.86685315857	33.514021329456	20.305671395634	TRUE	20.04988358575	3.86628433511918	1.29328692305065	0.5621415091218	0.7632651180399	0.441250911296622	0.329562291012341	0.42564691427132	0.46277598621435	0.12065683223442	0.464023761630839	0.33240210672367	0.34119691005379	0.0376750556248426	0.881836065890314
ENSMUSG00000049076.11	Acap2	3.3199116660817	3.4735272243838	13.083523731505	17.961805943077	8.6077976730617	4.5702150533146	TRUE	6.58900636318815	4.73288458456068	3.64760081199504	0.60791855501846	0.70739956440367	0.218647276969793	0.526611159674846	0.41118676275712	0.41239443584146	0.00423104660851024	0.923243932450596	0.44075531364171	0.4765680155945	0.112704167242439	0.997428004066572
ENSMUSG00000032816.15	Igdcc4	1.3430967300845	1.1390404231487	8.480684179088	10.801658639755	32.944166478389	34.471856214602	TRUE	9.6411714094215	12.4539924599165	6.85170189072659	0.65366719973978	0.55618460653032	-0.23299249033059	0.166076900847903	0.65368250512606	0.66941376175814	0.0343081241164915	0.937777522934307	0.64086111999877	0.63351159416649	-0.0166407235651659	0.540489696819867
ENSMUSG00000041229.15	Phf8	2.463118448937	1.7660679358478	5.3164895023551	9.5748244886201	6.8655266475675	4.8175771781809	TRUE	5.067033340268	3.26350519764479	2.81400825236184	0.63620603046865	0.70395099496429	0.145980953236288	0.953646957145612	0.47111227759518	0.52504883351446	0.15638068019279	0.444937156175956	0.36395930922858	0.27893685283633	-0.383838611383373	0.227525771872984
ENSMUSG00000050240.16	Hic2	19.139463738168	18.301739048311	2.9004391153967	2.6341942997267	3.500023651484	4.3786876485002	TRUE	3.9393556499921	1.73766493604731	4.04928827162622	0.57640549592083	0.6184346227779	0.101536998730808	0.569178851044591	0.27244068315644	0.3385044319662	0.313232567909711	0.301928166640934	0.32157465028902	0.39607545389036	0.300621611982854	0.074992548123209
ENSMUSG00000034154.15	Ino80	8.7770957949318	7.4356753921617	7.9842109865335	10.256814519709	8.0191582739534	4.3305702018134	TRUE	8.00168463024345	0.994394944573475	1.03246675687991	0.53412698178665	0.72196553711867	0.434747207206132	0.406873390559322	0.22570383210217	0.20872882045728	-0.112801097542161	0.791981003280773	0.32111256889175	0.34462984271685	0.101968499332821	0.975015274300635
ENSMUSG00000041408.18	Wapl	18.662733757688	20.99134385488	12.209378163795	19.367927429383	7.912221293426	4.1833812734929	TRUE	15.4360559607415	7.03283123562881	2.93252455806787	0.49909673443584	0.74044396014908	0.569071086147421	0.122482690926768	0.2919663762034	0.2663575204658	-0.132438218005818	0.642871881181512	0.30155888163948	0.36948047848109	0.293058414835889	0.666048491169712
ENSMUSG00000027010.16	Slc25a12	10.076630662938	13.808843726999	12.16453784525	13.797857913948	24.977706170617	23.140982487549	TRUE	13.8033508204735	3.97746971131425	1.55164080119296	0.50704625936004	0.54925846122003	0.115367814602538	0.968618256511358	0.53830060039904	0.5746971320069	0.0943898150215667	0.322809254763267	0.46038856430039	0.49803459640503	0.11339396536175	0.0900786062622887
ENSMUSG00000058056.16	Palld	4.311016683618	5.1306147858255	28.264707311383	69.555468718647	5.0164978531413	2.7641165393978	TRUE	5.0735563194834	2.27725834104448	5.12833708799347	0.46695300103243	0.76428283371818	0.710829277334614	0.55714483955074	0.15296429093224	0.20231175080734	0.40338521864238	0.229308226735118	0.35019713259063	0.43593267415521	0.315938069999122	0.632377325324318
ENSMUSG00000014039.18	Prdm15	4.2507272885852	3.4917993753483	4.3401162555541	5.2304344577666	8.1446968963295	5.9692672469478	TRUE	4.78527535666035	1.2739536711342	1.37307714006205	0.5527217662761	0.62182643137109	0.169958513972622	0.597382417832021	0.29243006779317	0.35628553622495	0.284942259501851	0.189260705436217	0.30564964305472	0.37161347066492	0.281923916819711	0.0473550671032813
ENSMUSG00000030779.16	Rbbp6	5.5355435969267	3.5827511210479	5.2320428745278	8.0221130643412	10.59808692249	8.1963872951599	TRUE	6.77882833063395	2.19746851901458	1.90444629496267	0.52633056689653	0.64304014599285	0.288939627591776	0.0324591054863005	0.40685744581472	0.46157650508874	0.18204639718344	0.425431943747269	0.5236681205757	0.58933540404137	0.170436157710912	0.185808055946333
ENSMUSG00000026024.14	Als2	4.3739838912789	7.1688917890411	12.573106537687	16.529927701963	21.099938410834	15.229062622004	TRUE	13.9010845798455	6.939335922249	2.60066282553587	0.59915306759587	0.75321626646889	0.330139536622985	0.429826209728929	0.71095801479582	0.68776318806539	-0.0478524659428853	0.603416866837292	0.58432967635925	0.57100780017847	-0.0332721078439209	0.876977062504621
ENSMUSG00000038214.15	Bend3	4.7560914913672	6.4980635445068	9.1355343484045	8.5745282708725	10.015004733019	8.1536634536715	TRUE	8.364095862272	1.79568609565477	1.13565434210623	0.52031992289957	0.62127188706698	0.255825824174615	0.606441931780533	0.51408852038219	0.50422765610124	-0.0279415470667474	0.719468914963107	0.61392922719095	0.64636501797432	0.074276766336652	0.273386764423291
ENSMUSG00000036339.18	Tmem260	4.1470333462323	2.9507638332878	7.8115433783041	9.1385341547089	13.329387205336	5.9332435959076	TRUE	6.87239348710585	3.7001995493237	2.57304538780124	0.64105274901003	0.51218324609088	-0.323783011815727	0.480169057686398	0.56132441090482	0.53643686345563	-0.0654264193140344	0.393095272291566	0.62226823357511	0.60575543221844	-0.0388011620211431	0.876860035145525
ENSMUSG00000022772.12	Senp5	7.2459614510061	6.5794784834148	40.99780451459	57.387437468607	13.64615437663	7.7883102862929	TRUE	10.7172323314614	5.64057003123853	4.45977800299148	0.5353196816621	0.53998395214917	0.0125158362584183	0.960113545320819	0.42576820655535	0.4380819519742	0.0411325567221382	0.615252871835776	0.62573266830617	0.61927809799327	-0.0149590031867511	0.813152714255004
ENSMUSG00000058318.15	Phf21a	3.9727857610688	2.5459721087996	5.1335599133611	5.5293191864501	13.363883974129	11.448284989957	TRUE	5.3314395499056	3.0720370677566	2.79068101835798	0.524556472614	0.50970467101526	-0.0414365241955478	0.812645052709933	0.14892716552933	0.17918888086795	0.266874179962876	0.111681951060377	0.192579732558	0.19355100540844	0.00725792247162947	0.919068128039209
ENSMUSG00000032621.8	Srek1	3.9323843715327	4.521243715642	4.6852911122616	6.0835341361553	6.0545301704954	3.3375218810014	TRUE	4.6032674139518	1.43562276292141	1.06755898434608	0.53469131384839	0.68556081549552	0.358578411786633	0.185151355266036	0.32638451779073	0.34184662269065	0.0667765481512583	0.642635515101799	0.30840567785469	0.43337418961349	0.490783907658461	0.204017082536895
ENSMUSG00000040430.18	Pitpnc1	2.574785510867	2.6473488788811	3.4711343715427	4.2958772956636	27.235801884467	17.129844472357	TRUE	3.88350583360315	1.88651752577976	4.43920398210425	0.55027010020972	0.67312703510357	0.290738861750435	0.560435190325602	0.40281630050948	0.40535860743286	0.00907671261051195	0.890884976171509	0.50679821559221	0.56822113850199	0.165041057656512	0.563034079784044
ENSMUSG00000026235.14	Epha4	2.8793817919509	2.7956605385762	17.70558282731	56.149120959375	7.7650276376121	3.5511633745623	TRUE	5.6580955060872	4.18178351770514	5.59860176169486	0.75710406274279	0.8040931029686	0.0868709454360471	0.139755295913568	0.44408909727605	0.51799241452325	0.222081818768937	0.172359075417537	0.42120812089639	0.50794355622302	0.270134938732805	0.224538267000344
ENSMUSG00000043019.12	Edem3	4.1801395035229	10.187164889278	19.418776818114	38.796526094853	10.822741653227	5.7987341156572	TRUE	10.5049532712525	8.17730470606075	3.4971079714886	0.60554756879068	0.76802422487715	0.342911521599061	0.532893383858837	0.69497551379896	0.6842552926418	-0.0224274592640653	0.728388983113914	0.68121519909989	0.67649994973998	-0.0100207974016392	0.45885143431021
ENSMUSG00000040297.12	Suco	5.3387424765831	7.8348125284284	11.066130762905	22.863208493352	4.2744503833668	2.6915790853509	TRUE	6.58677750250575	4.60163868005459	3.47422140691916	0.56075614056787	0.70039731384553	0.320800037127194	0.293681882863223	0.42499570539984	0.45838456474241	0.109110201981646	0.598426016424129	0.48395211319245	0.56605060023364	0.226066723159723	0.690966014402266
ENSMUSG00000026842.16	Abl1	11.902770111726	18.002891394495	66.281043523548	72.567363682154	57.285971010019	62.645657562817	TRUE	59.965814286418	14.0230080005436	3.20055429433748	0.56343394508283	0.69873805770091	0.310505236654103	0.408330220570072	0.68523001656555	0.65618004050454	-0.0624966391570188	0.300281483604891	0.6003231215672	0.61042580993119	0.0240767285462108	0.912089224349941
ENSMUSG00000038894.7	Irs2	1.8057282466369	1.384612050041	5.423968450222	6.5474388320817	17.507139225413	18.587029211093	TRUE	5.98570364115185	6.5094049564444	5.05693499465839	0.51803525520502	0.5697140561034	0.137187716375822	0.615576913229921	0.47595844518373	0.53814846485868	0.177168618926616	0.511550818894351	0.47723693734965	0.46838144969589	-0.0270217707061476	0.884687246532718
ENSMUSG00000036291.6	Ap5m1	5.6858806931003	3.5629221076638	6.7386616865169	5.2575172005977	4.0374650729686	2.0798520833199	TRUE	4.64749113678315	1.57374919938408	1.90701143284709	0.49659435851137	0.51448811768032	0.0510698857758633	0.918704813691213	0.41132474069243	0.44327352939716	0.107919362001836	0.13529681197623	0.53644260115589	0.59896775991715	0.159054538240857	0.678819157865281
ENSMUSG00000027506.15	Tpd52	20.649936029191	28.994552405358	26.334131236086	21.785791830762	16.605370248147	11.301232045894	TRUE	21.2178639299765	7.21193052035918	1.45688171022823	0.59195260251452	0.49648139699397	-0.253742002850585	0.578388812350493	0.39644185713864	0.3773906518472	-0.0710506061343418	0.736201968747989	0.75439324090897	0.79443126293483	0.0746056477383675	0.520852828335199
ENSMUSG00000020594.14	Pum2	21.158418062692	20.339879068143	27.970757744938	40.94805341426	14.592261860963	8.4730820817271	TRUE	20.7491485654175	9.91747899879067	2.26553256675821	0.51459855153192	0.5789522749029	0.169997030381275	0.591697684270939	0.36709404680757	0.34799359386736	-0.0770889702475447	0.59800310661692	0.44548960312822	0.51508420591465	0.209416540809458	0.909570764280005
ENSMUSG00000041961.14	Znrf3	4.3954691552038	7.2997778593571	5.0152683857022	6.380516458167	14.531905703091	8.9139342655105	TRUE	6.84014715876205	2.89008101670189	1.90549598995324	0.56613498216245	0.63126180984937	0.157092401129893	0.647887339144543	0.4643790357939	0.42062418082357	-0.142771053742226	0.356074808640702	0.59521440721171	0.66713008914847	0.164558664323253	0.426790321590145
ENSMUSG00000037933.16	Bicd2	4.1837066675119	4.885606732719	54.630878155969	70.079766987253	33.745143541013	23.028502039794	TRUE	28.3868227904035	35.3632214454611	5.61484612543144	0.58675129706918	0.65244182636659	0.153100146515474	0.68993795861598	0.67379858105184	0.66601442704755	-0.0167639613455514	0.791630020806537	0.64340202501136	0.63722328675533	-0.0139214868369564	0.759478002125461
ENSMUSG00000024491.16	Rbm27	4.7832648438016	3.6365167062911	4.2742632996587	7.3145909903605	5.2965205076848	2.6638676825927	TRUE	4.52876407173015	1.23056081797315	1.49862743374562	0.53959514712943	0.71440793607602	0.404870733469518	0.149907476797519	0.21668491831668	0.24272044068415	0.163696867461243	0.677845476092162	0.2443830317814	0.28357078646105	0.214564795243034	0.959976900493283
ENSMUSG00000020964.14	Sel1l	6.0061894770708	9.8282999378389	51.525317607807	80.476481065218	39.090712114154	21.882123768609	TRUE	30.4864179413815	30.9099991987474	4.83219664175175	0.73877274189566	0.7643245007707	0.0490546403912913	0.653674288907283	0.70088113661029	0.7271403640149	0.0530640862498773	0.311985462583197	0.50651309579599	0.44280131792968	-0.193940054019134	0.329828748627402
ENSMUSG00000045302.13	Preb	11.564530679545	14.27523428319	14.813770972842	18.661585019549	22.961433159736	19.674014140151	TRUE	16.7376779961955	4.00211550796519	1.23755570849036	0.5164828009668	0.54824298603141	0.0860951421303613	0.535267951427531	0.81336180401243	0.78928283009475	-0.043354877055335	0.0224346919269966	0.82878311889538	0.77351416750858	-0.0995669017390041	0.0582499992737093
ENSMUSG00000032228.16	Tcf12	6.9155402247425	5.8710769310408	24.032603622243	26.809427619673	73.207292692109	40.815256338937	TRUE	25.421015620958	25.1298595554524	4.40788402791077	0.53351074438958	0.63059949185928	0.24120668166685	0.697640300496082	0.28802341073552	0.28219322073261	-0.0295027498770179	0.836232123352433	0.43071210917194	0.48135099324886	0.160365382769004	0.771401292589072
ENSMUSG00000069094.12	Pde7a	5.6731506458015	5.6227483476398	8.972476949966	8.4382542951367	10.635305840567	7.4565570275797	TRUE	7.9474056613582	2.44579058927714	1.21945744109173	0.62081947682765	0.49668486868005	-0.321843023300727	0.628740265101597	0.35174702762688	0.36136140751956	0.0389042059775425	0.62183832384944	0.60138065603614	0.60110146871464	-0.00066991793583294	0.876831211478799
ENSMUSG00000042202.15	Slc35e2	5.9561012225951	15.063466338981	14.104209241648	12.894786440448	19.859756738968	13.442569015769	TRUE	13.7733891287085	1.60764240878251	1.40777540348827	0.57561435446895	0.62400652701394	0.116458549588571	0.722752896922614	0.57257555256558	0.51608244592636	-0.149864512957847	0.00743691034382734	0.70274704192774	0.7865154164311	0.162469568194051	0.153886940724117
ENSMUSG00000034135.15	Sik3	6.0144146761282	5.0755699533118	15.174421684641	19.269280408526	20.357084673692	21.523739814757	TRUE	17.2218510465835	5.51313883162254	2.90288854991593	0.59557980405735	0.54074467915385	-0.139347269013475	0.434043786936606	0.410028421888	0.46686241387263	0.187273528555747	0.131513560476685	0.46138823565017	0.46099367872101	-0.00123425091254976	0.999718210820787
ENSMUSG00000060510.14	Zfp266	8.3894484832849	5.7034409572574	17.023007413058	24.493646710406	19.539946799918	8.9049977547969	TRUE	12.9640025839274	8.26586440212012	2.95078337893445	0.55750777328835	0.61517902598916	0.142014396105651	0.560274694487808	0.38062839109315	0.38775894728168	0.0267768945510129	0.82630732917985	0.48751577092649	0.55659904573552	0.19118954505059	0.72955086267219
ENSMUSG00000042046.15	Dstyk	2.2750399724456	3.4312595497702	13.392614382285	15.806113835565	15.657766883379	8.4148590425476	TRUE	10.9037367124163	7.15829472712478	3.9211431779005	0.57277497031552	0.7135481361378	0.317042307884873	0.500997953285763	0.69923006015975	0.68080077798772	-0.0385345224967224	0.564949487795951	0.63424209049627	0.67302687132416	0.0856304842961213	0.775758269787491
ENSMUSG00000037890.13	Wdr19	1.6713994932289	1.1442996491828	3.0517094739843	5.2121996775099	6.9436666292991	3.7979907608451	TRUE	3.4248501174147	2.6247951766075	3.15914811511416	0.62743773349171	0.67624367577417	0.108070902869799	0.728967931124333	0.40277502765684	0.49688265993828	0.302930958047537	0.0817251718695565	0.31483225924567	0.28832013143394	-0.126911800042494	0.632717057919274
ENSMUSG00000021704.8	Mtx3	1.4917714802636	1.2941715268351	2.8461877949121	3.1634606520806	3.7168561325916	1.6614620777781	TRUE	2.2538249363451	1.23922318306794	2.34499218584097	0.50469414053939	0.63020710666271	0.320416686146809	0.196727128752027	0.43924067355182	0.38829259166247	-0.17786747170074	0.397067571002049	0.54606877781718	0.51112934599428	-0.0953942465820791	0.776221832341786
ENSMUSG00000021113.5	Snapc1	2.1220974578398	1.7897093233556	4.1947232421597	4.3457315882451	3.4787158527396	2.1876729411213	TRUE	2.83319439693045	1.30067164598894	2.03238812272514	0.5882029763764	0.56264593218846	-0.0640867510733497	0.785372022198908	0.60711157177347	0.65269239681946	0.104441561761233	0.328709004621616	0.57761413542825	0.5918207966432	0.0350543454457579	0.845621214722647
ENSMUSG00000020387.15	Jade2	1.7570684126505	2.3052260395478	3.054628373529	2.0430483738709	2.7418218143545	2.7732355779552	TRUE	2.52352392695115	0.541287774387691	1.0320267767348	0.47428751248703	0.68814649931838	0.536953848365455	0.40730729668996	0.5072313625243	0.50802509036474	0.00225579940764871	0.794924813899082	0.50277425443671	0.52000322597577	0.0486097978578024	0.309046475341167
ENSMUSG00000040102.10	Klhl42	7.1275683131091	7.3799320206947	17.890903796409	19.953307720054	18.500470323147	12.54273267614	TRUE	15.2168182362745	5.94533094632433	2.30360751891319	0.58536955552694	0.58477923769531	-0.00145562459308149	0.846398463755004	0.64265587828202	0.64142573273282	-0.00276419413081112	0.883319530241916	0.63581477823391	0.74208995850351	0.222987536119605	0.145008880253194
ENSMUSG00000002496.10	Tsc2	12.999157174379	16.125701359606	19.244231411359	26.331213788883	28.267169842693	28.666011098901	TRUE	22.787722600121	8.41948950506424	1.6656580368133	0.55787238333399	0.67884645964305	0.283150170393666	0.240412950611662	0.55418222334132	0.56893296985765	0.0378982542919333	0.784160776047997	0.49574651584931	0.51589369315506	0.0574711764265135	0.336712411938793
ENSMUSG00000037236.16	Matr3	13.045358764806	8.2150425638309	7.3154001876745	11.353348899869	6.8876514329717	3.9059502554842	TRUE	7.7652213757527	3.31042153221097	1.82169911204682	0.51789858658463	0.60522078836112	0.224791921497069	0.207218935488423	0.2616315726932	0.309438885858	0.24211785524184	0.449470943911679	0.31030638994057	0.34727697741581	0.162393365349937	0.654008074019395
ENSMUSG00000028136.15	Snx27	7.985135798983	7.1410922848935	13.515508595239	17.402423797633	30.414399548422	17.423320528557	TRUE	15.458966196436	6.99652634003321	2.48204988505135	0.56823434231146	0.63782980980594	0.166685499244235	0.686509283499842	0.46243575582205	0.45012061715376	-0.0389413053423391	0.815051536143346	0.62815279788482	0.66846299214261	0.0897321544391303	0.7742126210842
ENSMUSG00000039100.10	2006-03-01	7.72104011558	9.4860043070779	21.920717735376	29.569471358928	40.323420272044	18.695943209544	TRUE	20.30833047246	14.8878741255365	2.94903398325749	0.71081860283294	0.77860328240338	0.13140698812072	0.495673116787595	0.39653466063251	0.45780344263304	0.207281336114261	0.217913368445184	0.43570067848335	0.43528806461313	-0.00136689718120299	0.754555648530865
ENSMUSG00000018999.14	Slc35b4	5.9627782399241	12.823097157138	28.705151079547	34.416183806577	12.581495744947	7.3390872001965	TRUE	12.7022964510425	8.97175186755421	3.13587337206299	0.60790151207753	0.48303165469174	-0.331719870483259	0.649465092624343	0.47335055199029	0.48892627094359	0.0467079216923152	0.493097649167571	0.70555718487402	0.73399087694911	0.0569991144775253	0.420736239321249
ENSMUSG00000038267.15	Slc22a23	1.0039570534967	1.8641939601774	2.603294221072	3.9711249046161	31.283340168377	35.469746189581	TRUE	3.28720956284405	2.74745655143598	6.80725954898107	0.64250204253734	0.56054676381321	-0.196866305295268	0.920743487657289	0.70566179845027	0.65520908977056	-0.107021538941224	0.179204188962623	0.76624317177005	0.79149343038411	0.0467750630826693	0.448021172856899
ENSMUSG00000036097.8	Slf2	6.0509881691179	5.724810513685	7.493376618053	12.392710561952	3.8026534054819	2.4071566982562	TRUE	5.88789934140145	2.73593311747896	2.37239475081295	0.49957351147959	0.69883876216051	0.484262647749169	0.155552087050271	0.23336926857618	0.24367574066774	0.0623480384858481	0.953549285906647	0.35348092251128	0.39602648921922	0.163964577406434	0.988118212248661
ENSMUSG00000041879.13	Ipo9	17.221712478422	16.024936111032	64.003894951558	70.357862871959	103.63320121624	71.709251329376	TRUE	67.1808789117585	30.378988997492	3.38781116913634	0.69465386970223	0.7616540845634	0.132841632530277	0.48596699263308	0.51580527781412	0.57382524604808	0.153784907273092	0.306076684180468	0.48782707327372	0.56354172807144	0.208152613712708	0.0198383757568712
ENSMUSG00000037720.16	Tmem33	11.375616453271	20.499933348311	36.267571325318	41.574659530835	32.841804703152	16.99742218584	TRUE	26.6708690257315	14.284961557095	2.52516157500675	0.70766208259343	0.50628877233042	-0.483100129191504	0.416444493865662	0.66878964676145	0.64667907708809	-0.0485025802518105	0.757870008363069	0.74234975430215	0.79740275421268	0.103209522949986	0.362524076978507
ENSMUSG00000042133.16	Ppig	4.2519162827388	2.7312993157071	2.5341360113824	4.5478754337869	3.7347113261829	1.4589271475086	TRUE	3.233005320945	1.2733905151565	1.96736895845782	0.48132125311624	0.59835481117791	0.314001096401319	0.190090076704111	0.18295025913717	0.2592146859253	0.5026959979159	0.327681467334685	0.34490737608179	0.47705858179211	0.467957454874968	0.0998521046231182
ENSMUSG00000068663.14	Clec16a	6.9004408095033	8.0404923973231	7.9945574951374	6.7435883992798	13.120509087861	9.6755091983681	TRUE	8.01752494623025	1.77246363281006	1.00932629905482	0.49147906831341	0.57137250864794	0.217301648581707	0.76445092761631	0.56745946883331	0.61941269430333	0.126383599407522	0.209179079544695	0.7019353112108	0.6866924207159	-0.0316740409743505	0.597103816330518
ENSMUSG00000031523.16	Dlc1	10.393662290076	12.233421444841	67.487725764025	104.38638353571	5.9061282352862	6.8241209894809	TRUE	11.3135418674585	7.33652342237412	5.3265663897601	0.62309494444271	0.63343236677136	0.0237385758026317	0.825447022528791	0.35609898404005	0.37483848511624	0.0739907641702798	0.686944202316689	0.49084448626785	0.47553204103635	-0.0457234572070144	0.6496004169372
ENSMUSG00000028414.17	Fktn	3.4687791626636	4.3438562504813	3.9372729026824	7.0869246362209	4.8450908893604	2.4151411685672	TRUE	4.14056457658185	1.02025988300034	1.50893120783866	0.54656439548483	0.59333073114897	0.118445025802552	0.597152328908445	0.49139295365328	0.47385653626538	-0.0524268321330341	0.576745640835364	0.64529423576573	0.71128036995214	0.140461209979197	0.466466122376644
ENSMUSG00000040648.14	Ppip5k2	3.8587218036889	3.9533053638119	5.0861876491499	7.5590015169154	2.4092329444591	1.2104079066078	TRUE	3.9060135837504	1.98442652258729	2.60321787656488	0.55915603831321	0.67643096635497	0.274691768119356	0.243463635991904	0.49653346498067	0.46879498959904	-0.0829338041176441	0.67139931947293	0.4313306494346	0.43475687744914	0.0114146152623491	0.823277677243524
ENSMUSG00000029992.14	Gfpt1	3.3013634634562	2.1778122389936	17.804510516297	25.221234456678	10.61547623585	5.1560860143143	TRUE	7.88578112508215	7.62974614782076	4.85661692643072	0.59885821295576	0.60548395068611	0.0158742518462285	0.9950606690122	0.33315425833553	0.40526112516029	0.282661456839034	0.252128714610848	0.35664433996587	0.38980110720338	0.128252110663301	0.987391258420351
ENSMUSG00000055053.18	Nfic	5.2424418059113	2.7783658941041	12.021602204675	15.583083373972	8.442066070477	5.7745657505239	TRUE	7.10831591050045	4.59296442088655	2.93400482646596	0.47351319512303	0.48883808593373	0.0459520625379453	0.735227428022321	0.5065406715471	0.5034354645358	-0.00887126083850117	0.884585122987259	0.61214646799798	0.60336197449238	-0.020853110390336	0.456346234022477
ENSMUSG00000040640.11	Erc2	6.0030636158974	3.3565212305691	2.0299064522347	2.0723753151405	1.5418890723673	1.1036596768138	TRUE	2.0511408836876	1.07987618638729	2.4922407948228	0.4622297842048	0.37324782328255	-0.308476377359873	0.678529518021995	0.11202972912269	0.1352067693179	0.271285755580771	0.0116786565135027	0.22535245073751	0.20646491637133	-0.126286487663847	0.696210352715508
ENSMUSG00000078517.12	Emc1	9.4524285063705	13.050388411066	33.182219123157	47.717692056349	73.463056744165	62.580186083117	TRUE	40.449955589753	36.7164390142914	3.98142984027061	0.72944086279868	0.88623885989759	0.280904566891613	0.236994804515513	0.6441284641677	0.70094919552766	0.121961435844751	0.201256673891979	0.56827750320166	0.5596045776146	-0.0221878396206055	0.879477556709562
ENSMUSG00000034088.15	Hdlbp	19.331075682276	14.980800646672	251.89365838029	293.53474836359	97.805013503083	66.098540361373	TRUE	81.951776932228	96.0663105570721	5.93434884304628	0.61079108341259	0.76591471155459	0.326504748549912	0.467587721380027	0.33241453738066	0.3796466686246	0.191673872250509	0.377081797108084	0.45664187146714	0.53631819894749	0.232026056757191	0.390804403399835
ENSMUSG00000020590.16	Snx13	2.4798621606422	2.3013843166783	10.368251153652	13.875421294773	4.3073894114536	2.0411990787864	TRUE	3.3936257860479	1.81223251933663	3.97394818576284	0.60894135870188	0.57286590033329	-0.0881058383604185	0.72964400063505	0.25805597791765	0.2924299405228	0.180406978271116	0.570233950177642	0.49752493513411	0.53757397078142	0.11169445183884	0.891969561609577
ENSMUSG00000000439.9	Mkrn2	24.00688724312	18.506099910894	14.150885812689	12.430505345367	13.723777066111	11.650443344026	TRUE	13.9373314394	2.81228032860741	1.15159070868867	0.53780901637392	0.38579502337947	-0.479259408964473	0.353875717860205	0.32896528165557	0.32564008150453	-0.0146570477427462	0.675044172824247	0.52967971906818	0.47427226539943	-0.159404765636188	0.199889096416909
ENSMUSG00000038084.16	Opa1	3.9193190386336	4.1286193045513	10.520109388206	14.756966408439	14.645593483163	7.1158984198979	TRUE	8.81800390405195	7.10763589434446	2.9829509184789	0.59258342757964	0.73398198383265	0.308726371525669	0.404288910983319	0.52467843446071	0.53417409771932	0.0258765279233931	0.842648898843548	0.43689082089995	0.43228731519429	-0.0152822918086771	0.7612769043217
ENSMUSG00000044340.7	Phlpp1	2.3590315865455	2.3371748952343	11.618107809504	14.136568036204	27.549899280816	18.793130527806	TRUE	12.877337922854	12.1825975451564	4.73849622375249	0.58658537490475	0.64747321388205	0.142479407990301	0.667367802494204	0.43444770790222	0.46052990751431	0.084112312007485	0.496864286435752	0.42292844748446	0.48079680791844	0.185013714022057	0.478905430553589
ENSMUSG00000066571.13	4931406P16Rik	13.506300432325	12.208629728578	28.63626884749	36.421317102202	27.902412633366	17.846193524246	TRUE	22.874303078806	11.2158455861618	2.29145188394644	0.54723530685887	0.64859099978115	0.245147690374083	0.892486632181781	0.26280733676785	0.29567533063243	0.170008326895236	0.347396610247818	0.40307409691478	0.48478148048254	0.266289513279917	0.38700482543169
ENSMUSG00000037275.14	Gemin5	10.508408907134	11.292446999539	20.154871043572	23.503961281369	36.567970402273	37.369649411677	TRUE	21.8294161624705	16.2033179188621	2.59744468727651	0.68839862208223	0.79351820931355	0.20501912014114	0.272052113031301	0.5372705597718	0.59107109917916	0.137682894338304	0.378161720568029	0.44516188336548	0.47450136348836	0.0920821645177702	0.41092237817079
ENSMUSG00000004591.16	Pkn2	8.9764667967681	8.0689668535564	19.735210907725	29.43766239784	8.9690876731051	4.2705826996462	TRUE	8.9727772349366	4.15573144472792	2.82572594217849	0.53841231998715	0.63035763908389	0.227459164753142	0.378755187056279	0.273173777888	0.31391396390177	0.200550200931829	0.540569723943277	0.44715459138719	0.46985921159304	0.0714548433054878	0.893938014395453
ENSMUSG00000038587.9	Akap12	312.22679234705	259.06771296121	65.092768703684	149.01684389168	134.27664932143	191.85260651147	TRUE	170.434725201575	92.5076154761689	2.47777166471484	0.51977525629108	0.56520384225593	0.120883316665904	0.862852612891455	0.17957680273867	0.17732802206067	-0.0181804640377011	0.961457562483173	0.30055420092802	0.33615794452296	0.161514060480694	0.278467522320059
ENSMUSG00000025982.13	Sf3b1	17.783400202116	14.707241219611	44.675757212587	73.646977459822	43.537039697209	21.724936303532	TRUE	32.6309880003705	19.9353042518622	3.22726001522075	0.62695393810147	0.79768504925982	0.347459785173197	0.450770998025037	0.4066337402398	0.5209417838218	0.357392230675458	0.112551940304322	0.31382629217716	0.42299991521192	0.430691148676375	0.220502016413768
ENSMUSG00000036450.4	Hif1an	8.5738512062331	11.595154287209	14.554970076623	20.485454646301	20.43567369506	15.652179699104	TRUE	15.1035748878635	6.55347703703995	1.5103705619776	0.52002071459123	0.61736854010409	0.24756287495103	0.386934941523684	0.78072277947364	0.77005508706592	-0.0198487095113238	0.5860150765299	0.65071470551136	0.66339839181967	0.0278503572276553	0.468363826787609
ENSMUSG00000022013.4	Dnajc15	9.0137904011713	18.197436002642	8.5465134106545	7.5988273169799	6.0134109524871	6.0229399745292	TRUE	8.0726703638172	2.21711742126979	1.62799821146169	0.46392203475858	0.47928784431339	0.0470099797779487	0.860500091051316	0.6400793765345	0.56904504800808	-0.169707958592645	0.0506097782465532	0.73279386040746	0.73948082397614	0.013105320114927	0.822593121061771
ENSMUSG00000038831.16	Ralgps1	1.3116182352083	1.452909646339	1.4783059752835	2.0175402456977	10.774782113144	5.5103988044703	TRUE	1.7479231104906	0.54212628502235	3.74999779411152	0.61009122493417	0.51632197241777	-0.240753986016764	0.403224218900514	0.46387188148906	0.47644105429909	0.0385713366660006	0.784715127285354	0.59018888945266	0.58744159104058	-0.00673134918129445	0.711806395247489
ENSMUSG00000036529.17	Sbf1	9.3120904505214	19.727914076818	61.721142053342	58.530837062592	64.513374069477	77.857061926295	TRUE	60.125989557967	16.3964120850239	3.36147174953489	0.62116552893524	0.6214202695061	0.00059152931556516	0.747402082621094	0.76262442790174	0.73297675821733	-0.0572052902798382	0.364989617947686	0.74856921781748	0.73090291784029	-0.0344559309045754	0.450662926720942
ENSMUSG00000047036.8	Zfp445	6.4632770911766	10.009448848861	5.0681172918223	7.940158201263	6.2398096480528	3.2900578229308	TRUE	6.3515433696147	2.12904392616839	1.59677498765225	0.46351916936119	0.66002633541705	0.509894585577289	0.206943273231758	0.40652239019594	0.44347922221698	0.125531698925663	0.561080371919175	0.38348579296989	0.54469825809449	0.506284122476772	0.241189679634536
ENSMUSG00000026028.12	Trak2	6.2672911015957	6.4973615334711	26.767021546433	32.933202444811	18.544259781049	10.784078419606	TRUE	14.6641691003275	12.2786601097705	3.61700100496541	0.57977076138783	0.64041640610227	0.143527688896914	0.785255591545186	0.2846596738925	0.26682792404795	-0.0933284740088735	0.657488644468961	0.65181239323039	0.73928957253229	0.181682781671162	0.34201028738821
ENSMUSG00000035021.13	Baz1a	1.2911598139572	1.0294030272153	4.9768933731304	8.5621216753079	6.6906493650852	4.5257957776857	TRUE	4.75134457540805	4.00264160425119	3.85855146071349	0.52811866361772	0.75147608711968	0.508865069675298	0.279756116636964	0.20993412976649	0.25241288445732	0.265848824850103	0.378011653866273	0.28675338562971	0.32991671859048	0.202291368689895	0.655196122723025
ENSMUSG00000039671.18	Zmynd8	21.174168698195	19.27569365179	9.8288713247423	13.929373072687	14.924930501591	10.51901660556	TRUE	14.427151787139	6.30580591687919	1.44215127608484	0.53161846798338	0.58955892250663	0.149244784707459	0.796518108393596	0.35470703195271	0.42699767289665	0.267600275772668	0.166225436507452	0.35818586744546	0.30714847795492	-0.22177218139878	0.0713232363951284
ENSMUSG00000030096.8	Slc6a6	23.687441691052	38.768822495569	93.177573047385	176.69619485694	20.983127727998	15.222661319818	TRUE	31.2281320933105	19.4594772203961	4.43510639607462	0.69501037709717	0.70466643171095	0.0199059711882728	0.596244548585923	0.58440474522841	0.65740400847313	0.169812360641401	0.106668013764858	0.58784977495	0.65941280227638	0.16573437537022	0.0868220892412898
ENSMUSG00000037286.15	Stag1	8.9216871440297	6.5639559738847	8.043208063026	11.139912122121	7.512243922484	4.4531226782973	TRUE	7.777725992755	1.74778611642849	1.29211417883981	0.54828752281398	0.68364514812271	0.3183150330513	0.0754587670943069	0.29360452289046	0.31160557121321	0.085846835013592	0.727145640736725	0.19140807286169	0.18950730710479	-0.0143982009467121	0.747337140683714
ENSMUSG00000054115.11	Skp2	5.9984918152216	6.5162067069197	7.5051383479086	7.399483360118	15.732784188223	10.993724848757	TRUE	7.4523108540133	1.77165005769677	1.50144857247436	0.51686441301719	0.70798953685719	0.453942165626617	0.462206800150325	0.43076503528289	0.49647874804557	0.204830811298156	0.0771780937717899	0.47790522776387	0.5630224190174	0.236467821007357	0.160401771002495
ENSMUSG00000021264.12	Yy1	12.147157677178	12.060089816628	26.406402001232	28.548428781601	29.357506030508	15.672920970176	TRUE	21.039661485704	11.7322673575117	2.26582534776388	0.52524932386918	0.64330255518346	0.292495019268228	0.638313819430002	0.43758072000016	0.42962637250142	-0.0264666182543002	0.709910468429455	0.58403422801683	0.68944047964553	0.239373084815432	0.170110851743405
ENSMUSG00000019889.10	Ptprk	3.9870983818222	6.529533398011	23.269057777857	41.116392737306	17.000700377298	8.6766903545862	TRUE	12.8386953659421	11.2386706111554	4.27674652979356	0.75908309221389	0.83397035811991	0.135738289402341	0.406095857806897	0.56051201971592	0.6226015906422	0.151563951892233	0.339161926879643	0.51928458087351	0.50034597768178	-0.0535993578563086	0.752772911712798
ENSMUSG00000040151.9	Hs2st1	6.8899109082024	17.550564694803	54.481077254015	67.794268699938	47.240506433456	29.27207459043	TRUE	38.256290511943	27.3765889601439	3.89780454968294	0.56848162261114	0.63987802278629	0.170683204872796	0.732274543680055	0.50219545732041	0.511354788448	0.0260756314344787	0.552682354974683	0.77310311392757	0.830663213432	0.103602816105948	0.272196773537815
ENSMUSG00000024978.11	Gpam	1.9524411835664	3.6489356193362	6.1499061487907	7.7818919828016	59.417729292905	20.413923428356	TRUE	6.96589906579615	6.17534133095768	5.37265652399702	0.67513196893455	0.75752565265897	0.166125209248824	0.63707822296215	0.63986290700526	0.69946862426116	0.128496509068854	0.268769416909742	0.67492084884128	0.70036637926071	0.0533915091609918	0.453162652228261
ENSMUSG00000025862.14	Stag2	4.2858114793047	2.7298070014721	9.1571317178555	16.355758861234	7.6492068928689	4.1716352578324	TRUE	5.9675091860868	3.69574852581512	3.15586609677408	0.54169623109135	0.66767925882455	0.301671171071115	0.241766930987034	0.26927763937558	0.37432127052487	0.475182596189432	0.294361229004646	0.28620008515491	0.33038866185072	0.20714007644219	0.910980236008008
ENSMUSG00000027164.8	Traf6	4.4239810364897	5.4858525852236	6.4364708881906	6.9173243879046	8.867597278247	4.2225481329765	TRUE	5.9611617367071	1.84831542640387	1.34876204712989	0.50384870482912	0.59595407396094	0.242210568718732	0.5889818336377	0.34809866881513	0.3533953782182	0.0217868751566033	0.852012200422012	0.6486210977683	0.70333252302128	0.116830979711329	0.550293895220783
ENSMUSG00000027184.14	Caprin1	59.879758782786	30.982098766325	102.20535432907	137.37000141627	79.461651025748	47.895193846344	TRUE	69.670704904267	40.2601219658448	2.53017334909812	0.54671216553446	0.74104778977415	0.438785105163602	0.450343758887236	0.23847775330633	0.29984230460917	0.330349257901035	0.272783349507719	0.29901360124697	0.38132706814644	0.350817833202363	0.405665659586606
ENSMUSG00000021477.9	Ctsl	16.480397955377	85.046948108203	265.88385611363	392.21787227899	44.877221869688	33.959351387082	TRUE	64.9620849889455	58.9218010170457	5.86681420709107	0.65097813009796	0.63272908324313	-0.0410211657043046	0.843222539118994	0.89432455701108	0.88979723644986	-0.00732187338951278	0.507645324393284	0.81486391696186	0.81531633414157	0.000800770390754035	0.977354375125211
ENSMUSG00000002222.14	Rmnd5a	10.23949980994	16.301741607367	11.667073709257	15.217494968074	17.480548580155	8.247246068783	TRUE	13.4422843386655	4.49393984443263	1.48190368485499	0.60547821070864	0.61622524436336	0.0253827425065801	0.798051451461726	0.44848197854005	0.38708196323534	-0.21241092986069	0.236187005336125	0.73840305247759	0.74847517268151	0.0195459451778293	0.935425922441729
ENSMUSG00000022377.16	Asap1	2.8704340111767	2.0913105858034	18.473663570897	33.125803428757	7.5818374827698	4.3301346155829	TRUE	5.95598604917635	5.15220364676751	5.18456143145139	0.54482020282314	0.64376858010664	0.240761964250876	0.633178254568416	0.27046270628008	0.30330007824172	0.165316193543385	0.603106582224551	0.39273152542287	0.42506929928408	0.11415465284434	0.834914205607802
ENSMUSG00000028431.11	Elp1	8.2187958634609	8.3363682764713	30.195225092659	31.306343194684	38.143093721143	34.514672629039	TRUE	30.7507841436715	8.27008962398255	2.99181479881699	0.66477691989193	0.78951183523008	0.248090598404118	0.55505010773707	0.53648688927533	0.59672529662882	0.153524022846874	0.419700019568796	0.40701442692659	0.47457432258785	0.221554111112575	0.139104619561668
ENSMUSG00000020611.14	Gna13	37.001703876956	35.869417645793	41.10566075606	46.034107163001	36.972972626817	20.349461860664	TRUE	36.9873382518865	3.88162701764092	0.953365687629003	0.50541859691837	0.61839592038072	0.291052052351076	0.763332450923719	0.50887509461243	0.48497124668833	-0.0694123702668869	0.479427173415685	0.68297436582452	0.69162704747765	0.0181628589471394	0.772994201413137
ENSMUSG00000038047.18	Haus6	10.041320741893	7.9223671029183	4.9945328373645	7.3367297532403	3.7636845186311	2.1944837489709	TRUE	6.1656312953024	3.0828313997321	2.64960278784735	0.50609631826107	0.666487504654	0.397165848741293	0.169195782197676	0.33527770181054	0.32118129531478	-0.0619686606940903	0.789261226743728	0.38297436583769	0.39346014856645	0.0389696909722812	0.738601559518474
ENSMUSG00000022000.11	Zc3h13	1.9119512243468	2.2282474419937	3.717092343874	5.3732458174308	6.0639985718201	4.3392862575927	TRUE	4.02818930073335	2.33138729571152	2.18923003710546	0.50040740328551	0.66159152245567	0.402837614491415	0.18654988103207	0.27169610761368	0.30378322519799	0.161048309632376	0.502096368586432	0.27958830532581	0.26745615785305	-0.0640015962789477	0.798995166439989
ENSMUSG00000032743.15	D430042O09Rik	4.0445062516385	1.9052464345315	7.5039850063006	8.1016135623741	10.632664859271	7.5390240154849	TRUE	7.52150451089275	2.73633800611592	2.41868177807603	0.61390470196031	0.6163411945997	0.00571450057860572	0.607714507970029	0.60024878752624	0.60244612864469	0.00527165554514391	0.980896884234864	0.47796783929292	0.57257975975816	0.260563125308393	0.0993850039838036
ENSMUSG00000022802.2	Lmln	1.4413310461706	1.949757431989	2.0980160727863	2.4696840856991	3.084022098068	1.3130779184884	TRUE	2.02388675238765	0.762318108202477	1.46567110127328	0.59538595494456	0.66147077384017	0.151852225410254	0.61459065688178	0.47483018472122	0.49878359866322	0.0710023769728262	0.693173914872779	0.51161239207632	0.45104404190779	-0.181782897644935	0.237082728421239
ENSMUSG00000022770.17	Dlg1	8.9669676259243	7.9122254137196	28.88140610418	46.507021131961	9.5251969286707	5.4498354320623	TRUE	9.2460822772975	3.80294587934315	3.49919983176875	0.57749378058686	0.72666351331318	0.331482059338868	0.261402937625168	0.3141852455389	0.34331252033261	0.127907040401759	0.549904440476315	0.43219164219055	0.47908752150875	0.148618063651139	0.666138872447544
ENSMUSG00000033487.14	Fndc3a	5.95794689554	5.302665354909	13.523465091662	14.123550180314	5.8954148241547	2.9663031210129	TRUE	5.92668085984735	2.65711071160878	2.50729497360867	0.53118612071408	0.63005898875965	0.246269454878447	0.509014866118612	0.26925011271131	0.28808640158783	0.0975546145242138	0.535722612949166	0.42598408333795	0.43430283815764	0.0279018548489818	0.743546290052437
ENSMUSG00000000194.13	Gpr107	23.819467902379	52.415426857178	60.221953438769	63.121947657351	64.180432179915	69.506357733595	TRUE	61.67195054806	7.66718348033121	1.32044398860728	0.57790507226363	0.69076224579557	0.257356700803271	0.436357722181604	0.76606597746707	0.7685284436509	0.00463000614627756	0.85683684778887	0.74264043329658	0.71251399895862	-0.0597455058555453	0.209944078626393
ENSMUSG00000049550.17	Clip1	1.0748669789909	1.4275072545915	10.527293324306	17.587638706214	3.931907427023	3.3549950506265	TRUE	3.64345123882475	3.54677078732694	4.9517152632391	0.6454176602944	0.76732639003143	0.249607318961102	0.196329048820208	0.32730308743772	0.3102665847837	-0.0771188820568252	0.886922930072783	0.51939726634876	0.48233258610384	-0.106810139941261	0.423113286990723
[truncated: 8,059 more rows]
