# Supplementary material for: Nucleo-cytoplasmic shuttling of splicing factor SRSF1 is required for development and cilia function
Source: bioRxiv preprint, doi:10.1101/2020.09.04.263251, version 2 (2020-11-23)
Supplement: Supplementary Table 2, related to Figure 4 [file 263251_file03.xlsx]

## Sheet: NSC
baseMean	log2FoldChange	lfcSE	stat	pvalue	padj
ENSMUSG00000020255.8	2381.85327819565	-0.269369951326872	0.490607796800709	-0.549053547626953	0.582968702519614	0.90286363807649
ENSMUSG00000051747.14	1.38773048367784	-0.929007344943228	3.5177040326997	-0.264094800559515	0.791706870262907	NA
ENSMUSG00000115801.1	0.894156141638383	-1.34376775495965	3.8968618081896	-0.344833309750837	0.730219689694656	NA
ENSMUSG00000101609.2	151.340196886185	-0.414309281780272	0.507787590926541	-0.815910607473288	0.414551264833164	0.861132175618031
ENSMUSG00000104211.1	0	NA	NA	NA	NA	NA
ENSMUSG00000089940.1	6.92980692665489	-0.427915793203056	1.43655322254028	-0.297876741695908	0.765797240021387	0.948899797519089
ENSMUSG00000044768.16	719.256915629687	-0.486936385536498	0.514998735894411	-0.945509865554958	0.344398636547966	0.848479919297358
ENSMUSG00000109536.1	50.5531055650286	-0.031285946145639	0.692750165472058	-0.0451619468388289	0.963978225308128	0.993956655512203
ENSMUSG00000096054.3	384.195290675028	-0.600718081003014	0.498148131566218	-1.20590250758205	0.227855083662602	0.829231175924863
ENSMUSG00000022708.16	415.73898510309	-0.293648028450437	0.452892494089976	-0.648383517683333	0.516736928120734	0.886647724682933
ENSMUSG00000091239.2	0	NA	NA	NA	NA	NA
ENSMUSG00000109564.1	0	NA	NA	NA	NA	NA
ENSMUSG00000109125.1	0	NA	NA	NA	NA	NA
ENSMUSG00000061462.17	4.14716426878735	1.04868775052219	1.83798817175053	0.57056283965277	0.568296014120355	NA
ENSMUSG00000030209.14	12.119717806963	4.73857271934549	1.53997714928319	3.07704092982882	0.00209066591895979	0.132695187866058
ENSMUSG00000028649.18	2346.41623835551	-0.96056150462679	0.489678540234351	-1.96161650083151	0.0498071497051656	0.692853028934357
ENSMUSG00000026131.18	1404.76366079974	-0.871567705914811	0.48252123895091	-1.80627842996043	0.0708748593628216	0.750768795207585
ENSMUSG00000026950.17	0.46425240005087	0.189595369085218	4.98165828944046	0.0380586860979806	0.969640891145462	NA
ENSMUSG00000096002.2	0	NA	NA	NA	NA	NA
ENSMUSG00000063450.14	614.186204421756	-0.645270657911934	0.43895286897928	-1.47002264596747	0.141555620739424	0.813875777415136
ENSMUSG00000066037.14	2363.27513459549	-0.491746815597279	0.472762159303262	-1.0401568863337	0.298267018157435	0.840531226654975
ENSMUSG00000075249.12	0	NA	NA	NA	NA	NA
ENSMUSG00000049133.7	0	NA	NA	NA	NA	NA
ENSMUSG00000092274.3	319.277960075065	-1.87466089090048	0.461915479269048	-4.05845003044067	4.93995008419096e-05	0.00723597132844998
ENSMUSG00000061601.15	21.7795563386919	-0.663656315741962	0.889089823204809	-0.746444620578099	0.455398873377719	0.871927817221244
ENSMUSG00000048154.17	702.460767871077	0.410641900683288	0.456590256128263	0.899366324996503	0.368457569992989	0.855344219410791
ENSMUSG00000059146.12	291.262139910564	0.155410305888341	0.450212519183426	0.345193212685905	0.729949121022386	0.94250493754853
ENSMUSG00000071753.12	3.15635507948554	-1.74689616577046	2.26162821272952	-0.772406426457761	0.439873748824595	NA
ENSMUSG00000057230.13	1090.87230344825	-0.810531841722118	0.482629436349029	-1.67940821814266	0.0930725127393538	0.781245657902783
ENSMUSG00000069170.14	403.954436882651	0.0802238687433786	0.509758199036761	0.157376318605507	0.874948275893898	0.974473308008247
ENSMUSG00000078578.9	4589.18426394132	-0.375158657958484	0.485835398144458	-0.772192926640012	0.440000170282653	0.868947098214347
ENSMUSG00000043467.19	146.944086947063	-0.764157817602587	0.605311777958574	-1.26242020298981	0.206797623277477	0.828918370899792
ENSMUSG00000074505.5	649.336795830971	-1.40324372893278	0.595161082142715	-2.35775451560237	0.0183858468501598	0.495283345221066
ENSMUSG00000036800.8	2.30702020769008	2.13091159975665	2.90135761431588	0.734453274302452	0.462672528004343	NA
ENSMUSG00000118215.1	0	NA	NA	NA	NA	NA
ENSMUSG00000054640.15	205.055018343059	-0.484945505232171	0.556301135419103	-0.871732006922519	0.383354594962242	0.858285420121816
ENSMUSG00000069833.13	42.912470159539	-0.0640530096578106	0.693232840240752	-0.0923975408256275	0.926382193208842	0.9876587089444
ENSMUSG00000058006.12	1373.43428943055	-0.689866727703012	0.49145875866529	-1.40371234725078	0.160404524183286	0.815951612175072
ENSMUSG00000086503.4	0.229612841788049	-1.19704868042682	4.99171724895189	-0.239806988402271	0.810479889073532	NA
ENSMUSG00000066842.18	370.513702567776	0.313666925141361	0.512797904578635	0.611677470482451	0.540751170718635	0.891819484268302
ENSMUSG00000117815.1	0	NA	NA	NA	NA	NA
ENSMUSG00000040838.10	0	NA	NA	NA	NA	NA
ENSMUSG00000095961.2	0	NA	NA	NA	NA	NA
ENSMUSG00000092111.2	0	NA	NA	NA	NA	NA
ENSMUSG00000047888.10	1385.88087180816	-0.662579087287558	0.449525605126488	-1.47395182772986	0.140494561823873	0.813424369642459
ENSMUSG00000090655.2	0	NA	NA	NA	NA	NA
ENSMUSG00000038872.10	303.690527737131	0.821939296222614	0.465307309950167	1.76644397937922	0.0773213922438577	0.753773617904001
ENSMUSG00000048108.13	1.40783734957693	4.1184667354955	3.85442335318578	1.06850399089957	0.285293231123182	NA
ENSMUSG00000021313.16	37.977792207372	0.160204528206495	0.749504602581503	0.213747224039326	0.830744182811698	0.965103517625922
ENSMUSG00000070327.14	735.793220420334	-0.233808433484141	0.449708182070691	-0.519911451038238	0.603125293815148	0.9068574561681
ENSMUSG00000033826.10	138.98627950286	1.71389383114314	0.537283631176943	3.18992377897087	0.00142310321747229	0.0979483652250608
ENSMUSG00000079173.11	4.54115625462038	-1.77671912382485	1.8175917023211	-0.977512783292274	0.32831535226878	NA
ENSMUSG00000002028.13	484.539632692935	-0.188302194038723	0.434077955311661	-0.433798104083689	0.664435058493452	0.926860955695921
ENSMUSG00000026915.16	523.760457501175	-0.64119751813181	0.545054542923473	-1.1763914757827	0.23943847648474	0.832237885230054
ENSMUSG00000049252.17	65.953167443569	-1.10207859615925	0.634941632608731	-1.73571638645151	0.0826139946376398	0.759575970358038
ENSMUSG00000045991.19	8.65145527858258	-1.07621885071184	1.3555650360766	-0.793926386465919	0.427238287481974	0.864668135435293
ENSMUSG00000034275.18	6334.08113202576	-0.509701242147764	0.457044470615987	-1.11521148360204	0.264759806187732	0.837881233887716
ENSMUSG00000046743.6	1013.84763408758	-1.42781795737673	0.469985563368075	-3.03800386366021	0.00238150901188234	0.141716324464026
ENSMUSG00000108621.1	111.880748629508	-1.13384337794366	0.563173834950844	-2.01330975904204	0.0440820523356812	0.67299104301114
ENSMUSG00000004668.14	4.68573257898567	-1.53798633105866	1.92905820827974	-0.797273158714156	0.425292405470984	NA
ENSMUSG00000055296.14	949.787011651413	-0.00542167789996195	0.420836655831057	-0.0128830932972209	0.989721063103089	0.998835995554976
ENSMUSG00000091006.3	0	NA	NA	NA	NA	NA
ENSMUSG00000032589.14	43.7678109403848	0.0125786646149391	0.695325451322575	0.0180903267542031	0.985566794822169	0.998302837890316
ENSMUSG00000066036.14	5876.03574833627	-0.191736308136429	0.416629730365902	-0.46020793563637	0.645366975477451	0.921904103892247
ENSMUSG00000037270.18	285.78027162705	-1.20749997874489	0.529113615698271	-2.28211851466221	0.0224823441889091	0.541155076839218
ENSMUSG00000020220.16	1284.59007282666	-0.902502340051665	0.483465205861156	-1.86673690083677	0.0619383379445839	0.733566015165419
ENSMUSG00000034687.8	469.847343782928	-0.526078450362756	0.480788775341463	-1.09419869461205	0.273867843877477	0.839290322368936
ENSMUSG00000068250.13	323.824618561457	-0.305311347408683	0.462336181082838	-0.660366546900166	0.509018634533067	0.884354315015188
ENSMUSG00000059854.8	57.8858653730933	0.721423926604171	0.645915258942676	1.11690181740728	0.264036307480436	0.837806902889719
ENSMUSG00000024073.16	2130.21334949501	-0.709402667918422	0.499035901356072	-1.42154635766826	0.155157986721364	0.815951612175072
ENSMUSG00000073664.11	111.267736485945	-0.80107031508181	0.581841725444549	-1.37678389164985	0.168579072544117	0.819808983974546
ENSMUSG00000026609.15	1.77867802875725	-0.584666913442855	3.16232748362791	-0.184884998935059	0.85331923726401	NA
ENSMUSG00000055632.18	106.472063718894	1.17097885444714	0.584119185823079	2.00469165003907	0.0449960217377127	0.677034083003443
ENSMUSG00000022262.8	7.48130041224044	-0.512403004870408	1.62610121172753	-0.315111384934056	0.752677084619044	0.946935999694303
ENSMUSG00000028842.15	188.894404497898	-0.554285763871221	0.496222110445508	-1.1170114192888	0.263989442667093	0.837806902889719
ENSMUSG00000094747.3	0	NA	NA	NA	NA	NA
ENSMUSG00000029797.13	6.21279037816326	0.641124949626792	1.58724635967856	0.40392277211247	0.686269510120245	0.931144554226962
ENSMUSG00000030655.15	460.882334567058	-0.697016427627395	0.491907665874701	-1.41696597955629	0.156492874263028	0.815951612175072
ENSMUSG00000094145.2	0	NA	NA	NA	NA	NA
ENSMUSG00000042744.16	870.789356074074	-0.295406602709344	0.41417515464354	-0.713240761541058	0.47569678708395	0.874341358146023
ENSMUSG00000036371.6	9335.70591289305	-0.00190534157281017	0.440256080903762	-0.00432780296617111	0.996546923610382	0.999744545551391
ENSMUSG00000057378.15	194.163127390505	0.26271124612837	0.523361452007834	0.50196904093815	0.615689298540848	0.912147352133814
ENSMUSG00000027070.14	817.057896763911	0.395066201307852	0.430390639730569	0.917924705693343	0.358658286349536	0.85370634881366
ENSMUSG00000033306.15	128.124049242104	-0.450091598238579	0.517874786374067	-0.869112785717807	0.384785444038294	0.858285420121816
ENSMUSG00000022565.15	351.186566992991	0.125380104050518	0.495006569971181	0.253289777664602	0.80004429485718	0.958729809215312
ENSMUSG00000033705.17	595.059783658365	-0.484447296924319	0.486611495776922	-0.995552511867505	0.319467617915935	0.843699396612436
ENSMUSG00000030592.18	23.3284809870989	1.25680333968091	0.913802912373507	1.37535492901472	0.169021434849777	0.819808983974546
ENSMUSG00000036815.16	6.96409801901293	0.676166947253609	1.4326538258913	0.471968130077022	0.636949536808904	0.919886338380064
ENSMUSG00000030451.16	2700.98372507563	-0.596024145837462	0.450452505707708	-1.32316756658074	0.18577965922873	0.824628800793053
ENSMUSG00000034731.11	154.357201031233	0.0201776584011408	0.508063373913195	0.0397148455038766	0.968320466014186	0.994996981644175
ENSMUSG00000033004.15	576.579328789943	-0.912353356246937	0.552030416990249	-1.65272298077563	0.0983872551567666	0.789193042121322
ENSMUSG00000038664.16	1419.42205201575	-0.699525929445805	0.499945899044445	-1.39920325535787	0.161752040670035	0.815951612175072
ENSMUSG00000022100.14	2140.7903680215	-0.723340047850992	0.477575376359866	-1.51460917722428	0.129871406743137	0.807025597785238
ENSMUSG00000044581.8	0	NA	NA	NA	NA	NA
ENSMUSG00000092032.2	0.229612841788049	-1.19704868042682	4.99171724895189	-0.239806988402271	0.810479889073532	NA
ENSMUSG00000048279.19	144.785185012065	-0.997834286039268	0.557156844063035	-1.79093965491408	0.073302979258911	0.753773617904001
ENSMUSG00000033987.16	1.30431462965152	2.30282585872422	3.37777582179534	0.681758050331543	0.495391954066782	NA
ENSMUSG00000038056.15	485.524213640363	-0.843912185567039	0.464311977129482	-1.81755420306915	0.0691322967001891	0.746962357212539
ENSMUSG00000066108.7	0	NA	NA	NA	NA	NA
ENSMUSG00000004110.16	14.7683733998371	-0.0575891247501064	1.03057955499372	-0.0558803291517437	0.955437141403375	0.9931471512401
ENSMUSG00000045103.17	1373.98465198139	-0.15183322506353	0.508168674882001	-0.298785093549472	0.765104025327154	0.948829565435721
ENSMUSG00000040249.15	4644.86132641058	0.0506416157742991	0.448830327244055	0.112830200412822	0.910165174754636	0.983196392369678
ENSMUSG00000061603.8	41.3954082272056	-0.106228162573174	0.729727786525659	-0.145572314135031	0.884259025241515	0.976256598247058
ENSMUSG00000092083.4	3.89660468845851	5.578172605128	2.42955158958819	2.29596795928648	0.0216777134429175	NA
ENSMUSG00000070047.14	16614.1680014701	-0.589086315457986	0.407072739921338	-1.4471278906365	0.147861107841599	0.815951612175072
ENSMUSG00000094396.3	0	NA	NA	NA	NA	NA
ENSMUSG00000028456.18	395.640616027865	0.150660577689622	0.513610376052208	0.293336320125876	0.769265094571454	0.949775085441837
ENSMUSG00000038538.17	377.761543408481	-0.283690238953049	0.441701115675285	-0.64226742674022	0.520699559970111	0.88731279319514
ENSMUSG00000059003.12	149.967820251332	-0.256033749306209	0.49820844096292	-0.51390889486207	0.607315688354459	0.90958171518141
ENSMUSG00000025261.17	3656.26463046066	-1.09210055678169	0.509424079557809	-2.14379453309247	0.0320493535792536	0.608008926371472
ENSMUSG00000019852.7	7.53888213118513	5.0517360329142	1.99085566319757	2.53746975549219	0.0111657015569992	0.373745690007525
ENSMUSG00000021268.17	5.26286209498539	3.43124430102312	1.88010148787771	1.82503142683875	0.0679962870041463	0.744943145665173
ENSMUSG00000030882.19	17.4308996851387	-0.960513914017496	1.06523283396773	-0.901693867658787	0.367219511480154	0.855344219410791
ENSMUSG00000055333.14	0	NA	NA	NA	NA	NA
ENSMUSG00000102439.4	0	NA	NA	NA	NA	NA
ENSMUSG00000047146.17	212.800550530266	-0.622563196691124	0.492804856188367	-1.26330572613749	0.206479329167072	0.828659567080591
ENSMUSG00000018707.13	6576.46044409153	-0.179177144747326	0.401599178937693	-0.446159141114989	0.655482294865471	0.924714131215575
ENSMUSG00000091382.2	0	NA	NA	NA	NA	NA
ENSMUSG00000032826.17	11291.4481668521	-0.762752827474188	0.512748662102903	-1.48757643627184	0.136862631509717	0.809895303977135
ENSMUSG00000043940.15	2495.07423660357	-0.713947033354467	0.450948821047102	-1.5832107769939	0.113373430922923	0.79755514569615
ENSMUSG00000047193.16	280.82279794295	-0.913406458655349	0.484258821981123	-1.88619477270144	0.0592687126837487	0.724498714674811
ENSMUSG00000028763.17	2616.47202404021	0.157358650299567	0.483561148928244	0.325416238770079	0.744866066998713	0.945609069907255
ENSMUSG00000060924.15	164.400163106291	-1.45620563866877	0.501953250933371	-2.90107820989502	0.00371881049174474	0.184510171678793
ENSMUSG00000032855.6	11497.8008891944	0.484353643141566	0.470866798232345	1.0286425905582	0.303647656395452	0.842411828949206
ENSMUSG00000021730.8	1.98860318307623	-1.64578047596261	2.81587054155129	-0.584465958813552	0.558906861429399	NA
ENSMUSG00000091076.2	0.229612841788049	-1.19704868042682	4.99171724895189	-0.239806988402271	0.810479889073532	NA
ENSMUSG00000110246.1	1.31903316675112	-3.73351509473821	3.56743231897743	-1.04655527026463	0.295304740968641	NA
ENSMUSG00000018581.15	3.09765362940306	0.463138996812521	2.11243522037642	0.219244118042112	0.826459890149021	NA
ENSMUSG00000038011.15	7.78620835675159	-0.552202040828303	1.43234955313024	-0.385521843897342	0.69985082574522	0.934398074218803
ENSMUSG00000022957.20	2909.54582453612	-0.508078941391182	0.417949139272116	-1.21564777541122	0.224119126381337	0.829231175924863
ENSMUSG00000115027.1	0	NA	NA	NA	NA	NA
ENSMUSG00000020609.14	0	NA	NA	NA	NA	NA
ENSMUSG00000033943.15	491.117386363246	-0.508202902629496	0.520302888896756	-0.976744341564359	0.328695737028805	0.844910646516937
ENSMUSG00000025255.18	79.8284597792979	-1.02177724590319	0.603390547813237	-1.69339286073711	0.0903807129050315	0.776024377638492
ENSMUSG00000052712.17	4110.19747548377	0.375278189509312	0.421561341279752	0.89021016104101	0.373353049647657	0.855344219410791
ENSMUSG00000040209.12	706.422315958048	-0.413080367452695	0.47470055984132	-0.870191447827187	0.38419578881546	0.858285420121816
ENSMUSG00000036698.11	1421.40360484723	-0.348540181087272	0.407343375175324	-0.855642198519265	0.392195721053447	0.858285420121816
ENSMUSG00000056752.16	16.1252188442353	-0.684653626782992	1.01530270280394	-0.674334486544947	0.500098683468605	0.882130073703186
ENSMUSG00000037646.10	386.559405704561	-0.863729897798713	0.476039294668379	-1.81440882606216	0.06961480793299	0.747999108686886
ENSMUSG00000026494.12	10.0253631481262	-0.187057769703474	1.2230250950225	-0.152946795993613	0.878440232149185	0.975389184926438
ENSMUSG00000029212.11	11.9006204427487	-6.90670603053406	1.85733941752987	-3.71860197729475	0.000200328417489052	0.0220078744803036
ENSMUSG00000005237.14	40.469889083124	1.49124311985435	0.727826871864436	2.04889813429712	0.0404720768242981	0.664377828175115
ENSMUSG00000047369.15	0.703918674788463	3.12053319432555	4.86723383753908	0.641130732256604	0.521437748693806	NA
ENSMUSG00000040865.15	278.428358457068	-0.125236291185927	0.472553292301046	-0.265020460604777	0.790993699928766	0.956321499473851
ENSMUSG00000055567.18	113.30877829513	0.337531733031844	0.583472710482723	0.578487608705118	0.562934960882324	0.899235045288444
ENSMUSG00000041444.14	1018.26096480725	-0.888879966802824	0.487763947881157	-1.82235684015621	0.0684008588473051	0.744943145665173
ENSMUSG00000028804.20	355.843411779961	0.517180552337825	0.46695251104576	1.10756563055968	0.268049453544686	0.839290322368936
ENSMUSG00000036257.15	261.548217988839	-1.23491655681537	0.693442766859796	-1.78084856578374	0.0749371930389469	0.753773617904001
ENSMUSG00000052557.11	392.655115081743	-0.64192560472854	0.471215624314647	-1.36227572178274	0.173110886588847	0.820335994164243
ENSMUSG00000003847.16	168.83361994972	-0.69476476922612	0.53027406674775	-1.31019940968868	0.190128385395338	0.825325654482975
ENSMUSG00000061653.4	0	NA	NA	NA	NA	NA
ENSMUSG00000059742.10	11.8337902693325	-1.00673252253326	1.21218248949133	-0.830512345509719	0.406249170754643	0.860457275258719
ENSMUSG00000033671.18	339.611803050722	-0.366155048821288	0.44983533701407	-0.813975734435988	0.415658852214611	0.861132175618031
ENSMUSG00000091945.2	0	NA	NA	NA	NA	NA
ENSMUSG00000022020.15	221.267653352865	0.0651315613746815	0.472158445809577	0.137944289576362	0.890284446954793	0.978747504773318
ENSMUSG00000029104.15	2296.46543874723	-0.498090134405324	0.41432555466538	-1.20217092283288	0.229297312486906	0.829231175924863
ENSMUSG00000048280.18	53.8166052536598	-0.497813284797368	0.646352365964932	-0.770188694295546	0.441187969340377	0.869436386581751
ENSMUSG00000019726.12	136.867246905561	-1.41907265983917	0.655725434739148	-2.16412630143543	0.030454657456256	0.596317022245812
ENSMUSG00000048078.16	500.857511629243	0.672730160016476	0.434003645272892	1.55005647381943	0.121127961864091	0.801999230979138
ENSMUSG00000051331.15	614.443145301896	-0.31801905210287	0.422366503356133	-0.752945722674227	0.451482530939727	0.871927817221244
ENSMUSG00000020721.16	542.680024091792	-0.57459594704884	0.440237577478267	-1.30519514108767	0.191826408296049	0.825325654482975
ENSMUSG00000061578.8	1.48323961248016	4.19033120634294	3.44948483299105	1.21477014952099	0.224453768835591	NA
ENSMUSG00000040407.17	465.318445514458	-1.32845369770743	0.534643055079266	-2.48474881528288	0.0129642874538312	0.404703020735443
ENSMUSG00000009418.15	755.861893920209	-0.320710064731028	0.419319724564447	-0.764834196779447	0.444370281770824	0.870383987231151
ENSMUSG00000015597.17	367.464925443124	-0.967554379822012	0.519713556557394	-1.86170702613789	0.062644397679422	0.733566015165419
ENSMUSG00000026565.18	339.875335315946	-0.637187345065346	0.475483821611742	-1.34008207241517	0.180218663824157	0.821273097410324
ENSMUSG00000116879.1	0	NA	NA	NA	NA	NA
ENSMUSG00000022311.15	0.229612841788049	-1.19704868042682	4.99171724895189	-0.239806988402271	0.810479889073532	NA
ENSMUSG00000068373.15	41.4257816277863	1.87875717635023	0.717213008810772	2.61952467854068	0.00880524013867804	0.326632479430009
ENSMUSG00000053205.9	38.9593189950351	-0.347283727847938	0.72759899954508	-0.477300996929726	0.63314780117006	0.918341902035123
ENSMUSG00000058192.16	189.954944705723	-0.104243344345148	0.559470349326478	-0.186325056315571	0.852189859408051	0.969397740410681
ENSMUSG00000079481.11	64.6964196903937	0.123575349793142	0.723530428445326	0.170794958905423	0.864384993043692	0.971935448077324
ENSMUSG00000090806.2	0	NA	NA	NA	NA	NA
ENSMUSG00000090619.2	0	NA	NA	NA	NA	NA
ENSMUSG00000038725.13	0.659516583375562	-2.73353604501918	4.7571170002654	-0.574620309920205	0.565548113187401	NA
ENSMUSG00000043760.16	2.27727908727147	0.114461608819175	2.58273192036747	0.0443180370043553	0.964650894349146	NA
ENSMUSG00000067336.6	934.894890027989	-0.743085772273699	0.449772224895092	-1.65213797371997	0.09850642733688	0.789193042121322
ENSMUSG00000021983.16	27.5120095684528	0.141349681845393	0.827337783479811	0.17084881733658	0.864342642657196	0.971935448077324
ENSMUSG00000016150.15	2.15861865181643	0.417190503186294	2.9474750652949	0.141541656483718	0.887442054154814	NA
ENSMUSG00000029765.12	175.444023553093	0.224090776910918	0.484203411493909	0.462802969973988	0.643505602205055	0.921202215281965
ENSMUSG00000019027.8	98.9917728460482	1.43446605895839	0.598719415190834	2.39589033287183	0.0165800501995279	0.467340144168634
ENSMUSG00000029705.17	3574.00511107105	-0.75460871885744	0.436366403645202	-1.72930068069812	0.0837552948833281	0.761080723070242
ENSMUSG00000037234.17	434.508822400066	-0.636923556826803	0.520308904154603	-1.22412580630669	0.220904772282653	0.829231175924863
ENSMUSG00000005871.15	1217.23366414932	-0.906417350087921	0.503374806455389	-1.8006808017879	0.0717532052562464	0.753773617904001
ENSMUSG00000068231.5	0	NA	NA	NA	NA	NA
ENSMUSG00000014767.17	749.638488256493	-0.340904660541496	0.42540606695979	-0.801362949470392	0.422921557869892	0.862860117814821
ENSMUSG00000021488.8	1721.80388510477	-0.733345738976491	0.513113712226122	-1.42920705781746	0.152944729749645	0.815951612175072
ENSMUSG00000107023.2	4.84951984628469	-0.54435062444434	1.74609445030067	-0.311753252723874	0.75522805350933	NA
ENSMUSG00000007989.7	2554.9507068087	-0.758492957541278	0.489551490638248	-1.54936298233389	0.121294487208573	0.801999230979138
ENSMUSG00000068284.14	160.533882198817	-0.886109172945567	0.555603460164927	-1.59485898932763	0.110743772240114	0.794077795567064
ENSMUSG00000061244.14	321.693970843119	-0.615405946508863	0.564707127412199	-1.08977896087304	0.275810523868155	0.839290322368936
ENSMUSG00000052861.13	0	NA	NA	NA	NA	NA
ENSMUSG00000022672.8	368.392294446536	-0.842894226179271	0.504076595408705	-1.67215505313405	0.094493750980411	0.781245657902783
ENSMUSG00000027520.15	0	NA	NA	NA	NA	NA
ENSMUSG00000091491.2	0	NA	NA	NA	NA	NA
ENSMUSG00000095664.2	0	NA	NA	NA	NA	NA
ENSMUSG00000066406.15	1681.28125587356	-0.654742379667552	0.434289036570046	-1.50761894621751	0.131652080861087	0.807535204651867
ENSMUSG00000010554.14	1356.23055261788	-0.366888748125024	0.42921281706814	-0.854794483145126	0.39266493290232	0.858285420121816
ENSMUSG00000074925.4	519.429817627776	-0.301457866120711	0.490775901199534	-0.614247491337494	0.539051794951674	0.890938646982056
ENSMUSG00000041297.8	1037.20032841857	-0.264282008613776	0.455367690165238	-0.580370575957808	0.56166474309583	0.898713353506773
ENSMUSG00000039126.10	104.142550243755	-0.679763282056619	0.588606589935156	-1.15486862308406	0.248144230177144	0.833143835152256
ENSMUSG00000045482.16	3999.28412360883	-0.487581174623734	0.399538761353819	-1.22036012969452	0.222328384645629	0.829231175924863
ENSMUSG00000108448.2	0.214951870793757	-1.14900650751966	4.9950726440521	-0.23002798745837	0.818070021930774	NA
ENSMUSG00000021614.16	2733.76888998297	-1.1792535067084	0.469106864870753	-2.51382700833701	0.0119429000025877	0.385456535300092
ENSMUSG00000017291.13	1006.0514995096	-0.754852651712031	0.48177777272947	-1.5668067196946	0.117159876248801	0.800742247513048
ENSMUSG00000019820.11	911.435455237394	-0.81587791911808	0.494303676346798	-1.65056008716729	0.0988284344455931	0.789245903787779
ENSMUSG00000037016.11	321.158425868558	-1.05783109755555	0.454165824917607	-2.32917370598604	0.0198498652740746	0.511559385063295
ENSMUSG00000115388.2	0.908817112632675	-1.37219470090632	3.87435060085849	-0.354174116457676	0.723208400073197	NA
ENSMUSG00000041144.10	43.527050340861	-0.00310425450879131	0.685387161868886	-0.00452919850486658	0.996386234795406	0.999744545551391
ENSMUSG00000052387.16	49.2841282487066	0.0750433603225812	0.669285520496264	0.112124583640982	0.910724625404037	0.983288536038252
ENSMUSG00000041741.10	165.786442864957	-0.811283862157607	0.553307567955941	-1.46624392858875	0.142581844993827	0.815951612175072
ENSMUSG00000036760.7	0.674177554369854	-2.76316660292946	4.71528072347609	-0.58600256590714	0.557873790540988	NA
ENSMUSG00000040761.16	847.66708473913	0.188860878882358	0.428786418548847	0.440454433052065	0.659608008115645	0.926344796722938
ENSMUSG00000052273.4	0	NA	NA	NA	NA	NA
ENSMUSG00000027692.16	2273.57532468106	-0.289157626614607	0.437158701531695	-0.661447720476501	0.508325231175689	0.884354315015188
ENSMUSG00000020431.5	1707.34730740243	1.01119813250622	0.429367235991696	2.35508918180656	0.0185182607485731	0.495283345221066
ENSMUSG00000039585.15	139.21468597475	-0.642313943281241	0.600976119881667	-1.06878446918609	0.285166799110482	0.839689233901408
ENSMUSG00000037416.13	228.023666670135	-0.658539864855888	0.537651310091019	-1.22484564344204	0.220633383884472	0.829231175924863
ENSMUSG00000096141.2	9.76977685132255	0.4005433907688	1.26138271458918	0.317543110537435	0.75083153322395	0.946649347559569
ENSMUSG00000033327.16	0.429903741587514	-2.1196455349258	4.8955512206099	-0.432973824480122	0.665033786086064	NA
ENSMUSG00000101337.6	0.913843829107448	0.109818252999183	3.82844488058772	0.0286848201879621	0.977115963122023	NA
ENSMUSG00000015829.13	273.010528677336	0.5416677179977	0.493709900202831	1.09713764657173	0.272581225464826	0.839290322368936
ENSMUSG00000056342.16	373.483692160705	-0.477550170446412	0.481782719102599	-0.991214818447471	0.32158069627181	0.843699396612436
ENSMUSG00000033454.6	305.852391698793	-0.495427649948494	0.590052885323149	-0.839632619840793	0.401114403810747	0.859196847200504
ENSMUSG00000021140.9	2031.6581465614	-0.630720502236975	0.43058102040649	-1.46481259587695	0.142972054370048	0.815951612175072
ENSMUSG00000055373.8	137.863261844412	-1.55082757547279	0.578974394453087	-2.6785771362786	0.00739357003488027	0.292635111449834
ENSMUSG00000052698.15	2856.08243973278	0.23292396282976	0.408164384784336	0.570662143765512	0.568228684765091	0.89971785582231
ENSMUSG00000053141.16	460.83647377411	0.0115417676082716	0.441660192944295	0.0261326870581866	0.979151505457366	0.997420637754303
ENSMUSG00000020783.14	952.693449572879	-0.392943058418203	0.501083930326456	-0.784186110622627	0.432930913815858	0.867481585522761
ENSMUSG00000094950.2	0	NA	NA	NA	NA	NA
ENSMUSG00000063142.15	423.537584369514	-0.0291491835449374	0.56960280646759	-0.0511745785202622	0.959186408697235	0.993505177822628
ENSMUSG00000023845.7	731.364114809438	-0.8935238170841	0.51862873038038	-1.72285830834855	0.0849141513440335	0.762522966980736
ENSMUSG00000062209.15	324.975116938176	-0.911672674287421	0.447027687024002	-2.03940986375296	0.0414091387972568	0.669499830856025
ENSMUSG00000040481.17	1311.39163859366	-0.756696143253501	0.487290141290042	-1.55286569363016	0.120455224209206	0.801999230979138
ENSMUSG00000117148.1	0	NA	NA	NA	NA	NA
ENSMUSG00000021879.13	1.15973830528623	2.01887808687261	3.87544645620541	0.520940776678764	0.602408028294279	NA
ENSMUSG00000056608.14	273.610705279895	-0.52792465299113	0.519754330010464	-1.01571958617546	0.309762938366322	0.843165818230377
ENSMUSG00000027022.13	0	NA	NA	NA	NA	NA
ENSMUSG00000027204.13	1311.46615472898	-0.300407530143894	0.414435000162476	-0.724860424496293	0.468537661859847	0.874341358146023
ENSMUSG00000037486.18	656.691259237137	-0.254340297004715	0.440109642193353	-0.577902123973406	0.563330201244418	0.899235045288444
ENSMUSG00000055013.15	8852.48266630607	-0.327761946611519	0.399557251247415	-0.820312847753979	0.412037784079473	0.861132175618031
ENSMUSG00000020716.16	857.563507212452	-1.08078293420047	0.496869874888057	-2.17518305863072	0.0296164012009479	0.59087995783684
ENSMUSG00000020154.10	57.5871437108255	-0.39647045529546	0.795918734096541	-0.498129316864867	0.618392898232231	0.913858540131411
ENSMUSG00000031010.17	1017.9547877582	-0.898153798295518	0.529105720646212	-1.69749402293095	0.0896033001673535	0.774049326867351
ENSMUSG00000042197.13	553.745578029246	-0.697081444508315	0.541340183462837	-1.28769573329886	0.197851899401592	0.827154552458072
ENSMUSG00000021097.15	45.5090958699251	0.217353786801494	0.692135813742372	0.31403343460334	0.753495645175085	0.947286411899252
ENSMUSG00000053580.16	144.957533390779	-0.608825788534702	0.501954680587738	-1.21290987429748	0.225164279994947	0.829231175924863
ENSMUSG00000047419.5	31.3191860375857	-0.038103184289041	0.788136357076046	-0.0483459289080412	0.961440551349971	0.993829843809227
ENSMUSG00000039298.16	2588.00261193691	-0.662232869878276	0.46434145510766	-1.42617649704512	0.153817402032793	0.815951612175072
ENSMUSG00000028634.17	177.413705708329	0.568835314838219	0.489612226406335	1.16180782292421	0.245313535686385	0.833143835152256
ENSMUSG00000027254.13	1606.6644718067	0.0654667600914434	0.446875686919467	0.14649881836879	0.88352762266064	0.976256598247058
ENSMUSG00000056258.9	9.01905463097002	-2.67405509306042	1.51656984831339	-1.76322580594246	0.0778624130207012	0.753808470085654
ENSMUSG00000044042.18	6.89791083219919	-0.152081237944927	1.50194550624131	-0.101256162299468	0.919347114692809	0.985787452956695
ENSMUSG00000052727.6	1465.82859347283	-0.423956534875488	0.466822830104059	-0.908174381233634	0.363786097113356	0.855232340346686
ENSMUSG00000063887.13	242.049259174727	-1.01999913476834	0.53211163737743	-1.91688935764592	0.0552519893895974	0.714647995591638
ENSMUSG00000023032.12	543.447188403226	-0.570182217626907	0.482348442182816	-1.1820961109496	0.237167567360735	0.832237885230054
ENSMUSG00000042678.16	0.930125463498179	3.49567907109695	4.56516090909174	0.765729651310895	0.443837180254806	NA
ENSMUSG00000026463.17	563.798532043633	-0.85696695267655	0.466338540815303	-1.83764985664343	0.0661140171489823	0.743306148851448
ENSMUSG00000034593.16	971.203031415594	-1.21202783997168	0.509462743898906	-2.3790313511368	0.0173581995746687	0.481108571163257
ENSMUSG00000042453.14	252.775205448688	-1.04874694977254	0.465202127858138	-2.25438983824329	0.024171654004271	0.551602937849795
ENSMUSG00000045215.16	20.0376363945797	-0.370390284004522	0.953764146713681	-0.388345782634785	0.697760160942637	0.933920280372652
ENSMUSG00000030287.15	1216.43224730781	-1.45596835273866	0.434145264669793	-3.35364328768173	0.000797551076470374	0.0635740946444152
ENSMUSG00000075028.11	262.061557194817	0.128580033361979	0.460235915028308	0.27937852993083	0.779954346002294	0.95266606669427
ENSMUSG00000070601.5	0	NA	NA	NA	NA	NA
ENSMUSG00000091620.3	0	NA	NA	NA	NA	NA
ENSMUSG00000028053.13	680.615216039108	-0.913771114810888	0.454153925877465	-2.01202954052506	0.044216823108329	0.67299104301114
ENSMUSG00000028369.15	334.192712663703	-0.707305107307087	0.44818505668934	-1.5781541502785	0.114530200557333	0.798858890018977
ENSMUSG00000063663.11	106.998911994556	-0.972168485698038	0.576507392812182	-1.6863070583637	0.0917366722435415	0.780057733093035
ENSMUSG00000005089.15	571.717238810338	-1.94279363671329	0.525466930856021	-3.69727098439544	0.000217929672705637	0.0234898033385485
ENSMUSG00000090315.2	0	NA	NA	NA	NA	NA
ENSMUSG00000025571.13	1616.44331743245	-0.0150995987241372	0.416109070710379	-0.0362875981010442	0.971053038709711	0.995963656720738
ENSMUSG00000026361.9	153.279932765779	-0.36742734217301	0.548061070969808	-0.670413137577602	0.502594462066129	0.882953667265215
ENSMUSG00000040724.5	236.090941264604	0.0713649446145021	0.517952291139716	0.137782853431286	0.890412036080057	0.978773205558447
ENSMUSG00000023473.13	92.4880364574419	1.72053426513179	0.592879367396899	2.90199720170054	0.00370791852431064	0.184510171678793
ENSMUSG00000040125.4	9.76936564492302	-1.41298391212219	1.383861052043	-1.02104464175517	0.307233288816683	0.84249089680945
ENSMUSG00000035284.10	238.597649773996	-0.910957389259423	0.543357884373362	-1.67653293613288	0.0936338504379355	0.781245657902783
ENSMUSG00000040274.11	109.023528327594	0.290884491260608	0.560502989679832	0.518970454424811	0.603781344932957	0.907366247760524
ENSMUSG00000020124.10	340.110275198589	-0.875046702049843	0.504322915123135	-1.73509209240709	0.0827244947154714	0.759575970358038
ENSMUSG00000032332.17	477.973459429655	-0.773255387343628	0.463913975726614	-1.66680770100211	0.0955526484589213	0.783071919783203
ENSMUSG00000115744.1	0	NA	NA	NA	NA	NA
ENSMUSG00000040225.15	1495.64682465199	-0.996331037163211	0.441724346672235	-2.25554929147363	0.0240988719929985	0.551602937849795
ENSMUSG00000022263.10	3386.96304279352	-0.158611069562209	0.423705957136909	-0.374342316624447	0.70814965276781	0.936801910392491
ENSMUSG00000059136.4	0	NA	NA	NA	NA	NA
ENSMUSG00000023011.8	16.2349379030015	0.7972881310744	1.19409927985336	0.66768998568721	0.504331503730367	0.883946953459912
ENSMUSG00000046449.15	196.351609305074	-0.917520728797764	0.527309997490153	-1.74000252823748	0.081858574019959	0.758380504605115
ENSMUSG00000035566.7	118.604270441183	-0.470910342513903	0.5345860102756	-0.880887889810528	0.378378502757394	0.858018591082356
ENSMUSG00000023033.14	438.913780238164	-0.253793524370755	0.434360378698166	-0.584292529469209	0.559023517422657	0.89798489258796
ENSMUSG00000005533.10	3233.93155194299	0.1350342369572	0.408389230331162	0.330650827514968	0.740908248807769	0.945536556990711
ENSMUSG00000025609.15	709.43125617345	-0.535804583070574	0.514280767772855	-1.04185226562317	0.297480177973242	0.840057923725333
ENSMUSG00000015647.9	6061.68683276843	-0.0936200979307506	0.459825788956492	-0.203599058989727	0.838666828558814	0.967411247755472
ENSMUSG00000034342.9	908.736630107214	-0.870326765697574	0.435019509974866	-2.00066145481121	0.0454288859561332	0.678086869536839
ENSMUSG00000070733.13	1853.17871460965	-0.650998533922126	0.467341743502914	-1.3929817804047	0.163625300294575	0.815951612175072
ENSMUSG00000030760.14	1402.00976577783	-0.597511754713963	0.481806384459548	-1.24014910135366	0.214920250449309	0.829231175924863
ENSMUSG00000045962.16	1925.65169378342	-0.827887343792889	0.494664327225941	-1.6736346209472	0.0942024300394067	0.781245657902783
ENSMUSG00000069729.14	1289.32431443593	-0.451633143449365	0.40978856327753	-1.10211261104302	0.270412717450126	0.839290322368936
ENSMUSG00000030465.19	301.554166705073	0.328608852134844	0.495148273354233	0.663657473566013	0.506909563399532	0.88395960895225
ENSMUSG00000052512.17	2103.10636952637	-0.131645284695902	0.410188520082204	-0.320938491085805	0.748257003934839	0.946043406253881
ENSMUSG00000055670.14	1361.51250012491	-0.51452169744951	0.415077958724467	-1.2395784614308	0.215131351294635	0.829231175924863
ENSMUSG00000046994.9	565.799279827437	-0.229044283534899	0.424486326855246	-0.539579885250356	0.589486791545986	0.904432005282165
ENSMUSG00000072780.3	0	NA	NA	NA	NA	NA
ENSMUSG00000041592.16	221.522359277642	-0.479686508963321	0.485691528405697	-0.98763614539029	0.32333087746454	0.844372950504973
ENSMUSG00000079620.13	6.27520192754347	2.57895002790929	1.62444140542027	1.5875919065496	0.112378649527331	0.79755514569615
ENSMUSG00000063108.15	399.069798847463	-0.778849271076361	0.547397749001192	-1.42282147213335	0.15478791515748	0.815951612175072
ENSMUSG00000026979.16	12.5979655194641	0.444878882526629	1.11262866569762	0.399844886476736	0.68927076768118	0.931788694656908
ENSMUSG00000042807.15	24.816887854616	-0.360777089826158	0.85219842877806	-0.423348691622753	0.672040873656446	0.929038811675851
ENSMUSG00000026726.10	8.11610259167216	-1.06812539661235	1.56571516163717	-0.682196495750532	0.495114710208261	0.880639294151106
ENSMUSG00000025949.16	567.593494842637	-0.945092340144379	0.544563328971696	-1.73550492635816	0.0826514096780102	0.759575970358038
ENSMUSG00000022995.16	1448.52612908849	-1.0361012868673	0.440773267447465	-2.3506445680506	0.0187409259636	0.499505426382858
ENSMUSG00000041991.18	0	NA	NA	NA	NA	NA
ENSMUSG00000063810.7	182.377722442499	-0.0978776873145605	0.551552842761257	-0.177458404211194	0.859148335262886	0.971327370046454
ENSMUSG00000050556.9	426.972780471393	-0.580998058503688	0.443421055945292	-1.31026267407421	0.190106989940755	0.825325654482975
ENSMUSG00000090100.7	75.7942381390736	-0.737941018352228	0.875082640755591	-0.843281518777532	0.399071016358436	0.858523471885703
ENSMUSG00000091631.2	0.31004182116606	1.86993753835657	4.97468760336826	0.375890445279512	0.7069983440692	NA
ENSMUSG00000045678.8	0	NA	NA	NA	NA	NA
ENSMUSG00000036099.16	1428.09329429756	-0.791880008817642	0.436053135084624	-1.81601723529396	0.0693677283121877	0.746962357212539
ENSMUSG00000026605.14	592.29367816926	-1.23320583839537	0.527198329852466	-2.33916871235248	0.0193267036596478	0.503375451852649
ENSMUSG00000035623.14	466.809931757325	-0.817233811464764	0.478123596695385	-1.70925220406017	0.087404242614156	0.765558672967198
ENSMUSG00000012819.15	9.61646371118476	-1.53014896325138	1.28030119283109	-1.19514765105218	0.232029347280107	0.830182494193876
ENSMUSG00000048960.13	11.5122056997239	1.74585204735894	1.18635570514443	1.47160926506978	0.141126422176517	0.813529977551682
ENSMUSG00000024598.9	4202.44010787127	-0.0799784402426303	0.408118849373183	-0.195968503698045	0.84463481838727	0.967927216149852
ENSMUSG00000026640.12	1870.37242958744	-0.153490668567852	0.421714855351979	-0.363967895889613	0.715881982916983	0.938607244396674
ENSMUSG00000037110.20	641.29186784061	-0.440359568639502	0.555521908414738	-0.792695233021739	0.427955408329141	0.864893842918021
ENSMUSG00000028370.7	4.22094586829415	0.420052162453789	1.81658934840395	0.231231215146585	0.817135180849005	NA
ENSMUSG00000063760.9	468.748225125555	0.0721897389285155	0.432490875529873	0.166916212602338	0.867435976299461	0.972982492884552
ENSMUSG00000006301.17	3308.69001237301	0.225279652841675	0.432909976514642	0.520384525797722	0.602795593170443	0.906600340127691
ENSMUSG00000056476.13	382.941144887913	-0.169375882044798	0.446291815201968	-0.379518235099489	0.70430306569803	0.936242422074183
ENSMUSG00000040423.10	598.037411345077	-0.757415421256155	0.476367318305999	-1.5899819155302	0.111838881489188	0.796524853016085
ENSMUSG00000034243.17	957.507206466855	-1.22577737666559	0.520655747622942	-2.35429529446642	0.0185578620729165	0.495396635834336
ENSMUSG00000032625.14	375.712303737477	-0.748881374273962	0.453570508708351	-1.65108039410802	0.098722160107981	0.789193042121322
ENSMUSG00000027799.12	559.125295001274	-0.468649726823858	0.486073531600712	-0.964153973331	0.334968736186597	0.845232338610262
ENSMUSG00000025813.14	675.720352129183	-0.383192417455855	0.425900601804451	-0.899722648506129	0.368267867397744	0.855344219410791
ENSMUSG00000020102.15	32.1877716869458	-1.36896662883991	0.850278920337756	-1.61002066039237	0.107393346010668	0.791186343380353
ENSMUSG00000034239.14	0	NA	NA	NA	NA	NA
ENSMUSG00000037652.15	194.141751996333	-1.61762746240176	0.534473618498744	-3.02658055779335	0.00247336905049641	0.144414130214088
ENSMUSG00000043535.13	496.613621668757	-0.881145306717135	0.548949336901229	-1.60514868583524	0.108461087096101	0.791186343380353
ENSMUSG00000063455.16	744.342170676689	-0.71930879798468	0.424207544280623	-1.69565300684243	0.0899516129884255	0.775203363167467
ENSMUSG00000042284.10	157.023443303296	-0.698022689728712	0.569724358931674	-1.22519369022174	0.220502251293914	0.829231175924863
ENSMUSG00000033253.18	1031.22313013787	0.147907021708923	0.486606414950994	0.303956169019718	0.761161284219991	0.948497231167795
ENSMUSG00000070695.4	0.469279116525642	2.54180416126131	4.90736535554811	0.517956984471846	0.604488281980679	NA
ENSMUSG00000030180.15	762.622820115311	-0.820036697370958	0.611113948965116	-1.34187200072857	0.179637501620941	0.821273097410324
ENSMUSG00000019849.11	3750.7180609624	0.061555519299835	0.409269483382337	0.150403393849744	0.880446363824915	0.975453175719945
ENSMUSG00000091572.9	4.26356257002516	3.0580802164086	2.13246864500779	1.43405635696811	0.151556180922657	NA
ENSMUSG00000089774.2	1796.06964812538	-1.26897207690315	0.460547235307371	-2.75535706137989	0.00586281153686378	0.246860597975874
ENSMUSG00000034832.15	1184.69214809684	-0.619746146374857	0.438184035186909	-1.41435126934851	0.157258790501144	0.815951612175072
ENSMUSG00000028664.14	5402.54638464518	-0.0064812494253191	0.435314347157711	-0.0148886648639931	0.988121003049851	0.998574266457785
ENSMUSG00000056602.11	94.705760171921	-0.996301646277192	0.567812683663367	-1.75463084031398	0.0793224726970694	0.755366858775247
ENSMUSG00000115705.1	0	NA	NA	NA	NA	NA
ENSMUSG00000035161.7	376.556522413049	-0.54673528887939	0.514448993271382	-1.06275898297069	0.287891264829865	0.839689233901408
ENSMUSG00000071847.13	1370.71940181579	-1.25828992915844	0.418453517555765	-3.00700048241501	0.00263839344245421	0.149718870097311
ENSMUSG00000016028.10	2891.17856187226	0.297496291002945	0.464240100325883	0.640824200223357	0.521636907962913	0.88731279319514
ENSMUSG00000032238.17	193.807834142994	0.326335646843086	0.498735986734102	0.654325445773515	0.512902155490589	0.885479644985471
ENSMUSG00000026384.13	209.825480537348	-0.250077664348847	0.48797309149105	-0.512482488705904	0.608313372818766	0.909687130831471
ENSMUSG00000046958.9	0.229612841788049	-1.19704868042682	4.99171724895189	-0.239806988402271	0.810479889073532	NA
ENSMUSG00000045071.14	567.088711546393	-0.61459903476896	0.443770516964286	-1.38494787570221	0.166068406277508	0.817369427565747
ENSMUSG00000044465.19	840.581269525718	0.291177992624566	0.443120248380833	0.657108298906525	0.511111283112253	0.8847010574667
ENSMUSG00000024298.15	480.041750610464	-0.822340063858888	0.513376468279767	-1.60182656329068	0.109193967308179	0.791186343380353
ENSMUSG00000046230.11	155.275619276724	-1.62149232018582	0.548893075815881	-2.9541132720168	0.00313568889061762	0.166375963490417
ENSMUSG00000034647.15	128.342209035787	0.130748274141325	0.529726421883379	0.2468222628512	0.805045780177327	0.960173230557269
ENSMUSG00000022521.10	1129.1760842377	-0.715467132866448	0.428335021806191	-1.67034469852474	0.0948511843050734	0.781245657902783
ENSMUSG00000116657.1	9.52832518690307	0.605202896172333	1.2481358515594	0.484885435680902	0.627757614163655	0.916866370507646
ENSMUSG00000022231.10	275.476465474308	0.192264133261724	0.462399635633891	0.415796463589671	0.67755894684175	0.930359162550612
ENSMUSG00000026207.16	1338.82983923368	0.452752830628525	0.454050167120286	0.997142746362173	0.318695226750383	0.843699396612436
ENSMUSG00000048148.18	8029.27645277174	0.331078930594543	0.424171029587057	0.780531690051671	0.435077981958965	0.867930343882203
ENSMUSG00000022894.6	30.2447209703924	-0.737245419825793	0.816272099270909	-0.903185862268596	0.366427259939495	0.855344219410791
ENSMUSG00000019841.15	975.194830645247	-0.638799745786406	0.471921248125269	-1.35361513880562	0.175859194529344	0.820335994164243
ENSMUSG00000102692.1	279.129890659859	-1.04633962079128	0.4630810173807	-2.25951740952292	0.0238512186051455	0.550301325929527
ENSMUSG00000033209.17	684.378697436203	-0.107474577049233	0.42595551725524	-0.252314086085266	0.800798301164818	0.959122320592819
ENSMUSG00000031467.10	3852.4939951634	-0.348493992974291	0.468984967891653	-0.743081371117211	0.457432417381507	0.872758200617268
ENSMUSG00000056268.15	721.180012533594	0.966154561902787	0.426536067845501	2.26511808669072	0.0235054340095397	0.549751036453445
ENSMUSG00000022197.16	196.031819033564	0.363251979391291	0.581027661866227	0.62518878744008	0.531847160069405	0.889829817138853
ENSMUSG00000032253.13	533.452739823314	-0.560823715271032	0.471575152396803	-1.18925628803939	0.234338830697818	0.831723830990143
ENSMUSG00000036862.15	4863.09601052807	0.855770665175431	0.477560635377013	1.79196232222917	0.0731390016431452	0.753773617904001
ENSMUSG00000059495.14	2886.56336440962	-0.998755947937467	0.552066304416516	-1.80912317949392	0.0704318687332666	0.750623563387751
ENSMUSG00000037974.16	0	NA	NA	NA	NA	NA
ENSMUSG00000026604.17	3826.14323243036	-0.118010915443912	0.40284298776574	-0.292945189634374	0.76956404690246	0.949775085441837
ENSMUSG00000039741.15	1009.42710770665	-0.186924794683602	0.466144116549433	-0.401002153727235	0.688418538238893	0.931725859039339
ENSMUSG00000041147.10	134.979368778924	-0.723122072778229	0.516101519334376	-1.40112370471385	0.161177084169466	0.815951612175072
ENSMUSG00000041482.17	189.004292951785	-0.710215431219487	0.487021143399335	-1.45828459574114	0.144762114397498	0.815951612175072
ENSMUSG00000049313.8	332.5248403181	-0.372938822065427	0.443754973882103	-0.840416094501084	0.400675128257941	0.859196847200504
ENSMUSG00000035236.17	87.1799966519552	-1.27445450219773	0.665327477570139	-1.91552963790433	0.0554249931479137	0.714846977963827
ENSMUSG00000029505.17	2053.77640220373	-0.270027922751784	0.402745463424624	-0.670467943836495	0.502559534799994	0.882953667265215
ENSMUSG00000024383.9	168.601789898954	-0.340884791007863	0.522752955482839	-0.652095387376635	0.514339639509669	0.885776527620358
ENSMUSG00000044647.16	107.396810965726	-0.757038084175827	0.564539697708555	-1.34098290562845	0.179926002770824	0.821273097410324
ENSMUSG00000039262.16	3870.63413611495	-0.1340146720995	0.408021432132502	-0.328450080181031	0.742571382711877	0.945609069907255
ENSMUSG00000053877.12	295.042319008051	-0.0461968651492805	0.490558518935063	-0.094171976158049	0.924972545609007	0.987432054676
ENSMUSG00000034751.16	419.763418811029	-0.224355175259313	0.520919633630769	-0.430690572546814	0.666693374552971	0.927465594559212
ENSMUSG00000041268.17	228.196222344175	-1.01029687913117	0.576596036263146	-1.75217451316312	0.0797438047219825	0.755890113564898
ENSMUSG00000068740.13	2429.65163055018	-0.396668792432165	0.461466713056365	-0.85958267673299	0.390019127597709	0.858285420121816
ENSMUSG00000028514.15	887.494788104968	-1.12509287428621	0.5242904993487	-2.14593412561139	0.0318782346997693	0.608008926371472
ENSMUSG00000090362.2	0	NA	NA	NA	NA	NA
ENSMUSG00000073678.4	562.935613040265	-0.706660834412997	0.505281608446577	-1.3985484977091	0.161948419769248	0.815951612175072
ENSMUSG00000046876.16	120.749590611418	-1.38003848202254	0.584057206209582	-2.36284813773419	0.0181350992424673	0.492550445035505
ENSMUSG00000024421.16	15.9186421768893	-0.241824338317036	1.04551547177534	-0.231296757288923	0.817084265702057	0.962747894970423
ENSMUSG00000034297.14	458.057839213737	-1.06733016363934	0.542232045768709	-1.96840111529413	0.049021903680525	0.68901358524198
ENSMUSG00000061755.10	370.628356150079	-1.23665952848009	0.535536635068522	-2.30919688308879	0.0209326584579887	0.52665085187735
ENSMUSG00000031393.16	1092.5211543037	-0.534615320599007	0.422394366529831	-1.26567815047138	0.20562833396226	0.828656558037319
ENSMUSG00000037996.17	2.73818300034932	-2.02080279110846	2.30882702704486	-0.875250838385649	0.381437437010118	NA
ENSMUSG00000062296.8	12.9331984891093	0.537408932758911	1.12054944048493	0.479594128864444	0.631516021920824	0.917818994545377
ENSMUSG00000057133.14	963.242367971829	-0.882480206839163	0.475406411513111	-1.8562648409188	0.0634158179177967	0.737327196387516
ENSMUSG00000021986.8	443.987185682576	-0.24348160358563	0.438382636364764	-0.555408867478585	0.578615028641037	0.90161176043702
ENSMUSG00000027878.11	4513.98649451761	-0.21806925929233	0.401529196051464	-0.543096894165525	0.587063090947068	0.903658485532089
ENSMUSG00000056215.13	13.5374211912624	-0.742485620038385	1.07846957162541	-0.6884622798577	0.491161715948362	0.878566642039499
ENSMUSG00000039801.7	406.306905736011	-0.784705076156647	0.452425197296821	-1.73444158469765	0.0828397620225114	0.759575970358038
ENSMUSG00000038143.16	1691.32445893277	-0.698922319333752	0.571411524892501	-1.22315054717393	0.221272839908123	0.829231175924863
ENSMUSG00000060206.11	802.889701206482	-1.00316149772357	0.476006722255588	-2.10745237581945	0.0350783856818944	0.627064581907837
ENSMUSG00000055204.15	1934.48222183514	-0.793618949634539	0.455986063604281	-1.74044562538049	0.0817807999740295	0.758380504605115
ENSMUSG00000022723.16	426.765304809086	-1.28942168832089	0.522073387452071	-2.46980926304975	0.0135185110374002	0.415942984127404
ENSMUSG00000053617.12	896.331892045978	0.595496186601501	0.416464570404479	1.42988438613912	0.152750204046812	0.815951612175072
ENSMUSG00000003452.15	107.541091215903	-1.04737211947456	0.553647090097574	-1.89176848972506	0.0585218333707789	0.721544734034826
ENSMUSG00000061751.16	635.619549090409	0.180526614940918	0.421454263534671	0.428342125256652	0.668402053788428	0.928055272086054
ENSMUSG00000075595.9	1048.01353694933	-0.789814732126683	0.533916064376339	-1.47928632387051	0.139063806453797	0.811315518289242
ENSMUSG00000115020.1	0.429903741587514	-2.1196455349258	4.8955512206099	-0.432973824480122	0.665033786086064	NA
ENSMUSG00000015653.13	189.048067677982	-0.768315579907273	0.613734989229853	-1.25186862960412	0.21061773734593	0.829231175924863
ENSMUSG00000040721.9	63.1178421571671	-0.45004366887083	0.623485712221804	-0.721818736257948	0.470405928540208	0.874341358146023
ENSMUSG00000021061.15	104.252704425012	-0.652210835236837	0.543577962271172	-1.1998478240578	0.230198446731516	0.829231175924863
ENSMUSG00000021466.12	3493.33575404735	-1.0512084394793	0.485268537745812	-2.16624066411231	0.0302928012559578	0.596048252496676
ENSMUSG00000033981.14	283.263099414695	0.40587296748408	0.53398919756265	0.760077112676912	0.447208492523365	0.870846287624135
ENSMUSG00000071531.3	60.1348929525926	0.851241543544749	0.655432789991909	1.29874726523105	0.194030677653021	0.826694534778231
ENSMUSG00000039683.16	561.759588478303	-0.325617161539326	0.457774627566698	-0.71130451958455	0.476895551498422	0.874651543887815
ENSMUSG00000026749.11	2955.0873255789	-0.0588331900139713	0.401206169199666	-0.146640791021068	0.883415555118745	0.976256598247058
ENSMUSG00000017485.11	1183.51528359466	-0.748271951217331	0.550141076164354	-1.36014557653896	0.173783860819641	0.820335994164243
ENSMUSG00000060534.16	91.5453899999219	0.222276189159473	0.567375641231843	0.391761952763575	0.695234109716123	0.933764396033606
ENSMUSG00000026275.13	934.925232241334	-0.87661850279698	0.442657757158336	-1.98035274118876	0.0476639063056025	0.687911682735685
ENSMUSG00000053774.9	592.623571281521	-1.03128389302647	0.56254623098237	-1.8332429162765	0.0667664542768479	0.743306148851448
ENSMUSG00000091624.2	0	NA	NA	NA	NA	NA
ENSMUSG00000056910.5	0	NA	NA	NA	NA	NA
ENSMUSG00000051323.16	233.82788708945	-0.859649069772854	0.481761292445872	-1.78438800138647	0.0743606394040463	0.753773617904001
ENSMUSG00000031229.16	530.874398191771	-0.762889149271768	0.526662636870148	-1.44853478463076	0.147467545037376	0.815951612175072
ENSMUSG00000064302.13	2502.19975424767	-0.563469114628914	0.444849979122902	-1.26664974951756	0.205280555278112	0.828656558037319
ENSMUSG00000003575.13	606.060791458854	-0.0694902906085925	0.489423865859292	-0.14198386195693	0.887092752829851	0.977119069220258
ENSMUSG00000015243.4	1393.04139524224	-1.72447429060005	0.436572431824597	-3.95003020092872	7.8141332793401e-05	0.0101453497076766
ENSMUSG00000038822.15	282.434797960825	-0.608578435900867	0.59669905620929	-1.01990849418641	0.30777186067516	0.84249089680945
ENSMUSG00000032410.13	250.748231735711	-0.699870588678287	0.539352385445135	-1.29761285490686	0.194420402592407	0.826694534778231
ENSMUSG00000034799.16	214.041925131824	0.167329901319378	0.504072318042464	0.331956140676786	0.739922377480285	0.94542052074022
ENSMUSG00000051339.10	732.002998245273	0.12177219155384	0.491773378757438	0.247618510504821	0.804429587364216	0.960173230557269
ENSMUSG00000063077.14	5856.66492787963	-1.02827382885004	0.481700144438209	-2.13467618958113	0.0327874692186917	0.611528545630023
ENSMUSG00000024294.14	1920.85978425905	-0.630752417781639	0.482172746565154	-1.30814614113908	0.190823745822705	0.825325654482975
ENSMUSG00000041235.12	1710.56997474248	-0.973428195093973	0.450661702352074	-2.15999759911592	0.0307728554296823	0.599959943570445
ENSMUSG00000115697.2	0	NA	NA	NA	NA	NA
ENSMUSG00000020122.16	9437.66002045444	-0.364497396750722	0.402690938525862	-0.905154206064443	0.365383698453198	0.855344219410791
ENSMUSG00000063317.7	736.241218178574	-0.212000010116445	0.507650018543787	-0.417610563128856	0.67623187240476	0.929920938369677
ENSMUSG00000032875.8	1328.41902782038	0.825838900715088	0.462238570258363	1.78660750930736	0.0740009471657045	0.753773617904001
ENSMUSG00000038095.15	862.719927527504	-0.842338581201521	0.533944254177183	-1.57757776137057	0.114662644674725	0.798858890018977
ENSMUSG00000051506.17	0	NA	NA	NA	NA	NA
ENSMUSG00000090774.2	0.229612841788049	-1.19704868042682	4.99171724895189	-0.239806988402271	0.810479889073532	NA
ENSMUSG00000094410.7	6.07334793045288	0.774767498423572	1.55981331787238	0.496705272064464	0.619396904109195	0.914372332177347
ENSMUSG00000026596.13	2163.22542635838	-0.866977721478691	0.557929029255201	-1.55392115487529	0.120203224912356	0.801999230979138
ENSMUSG00000078808.5	0	NA	NA	NA	NA	NA
ENSMUSG00000029361.18	9.82443077750591	0.769596423112003	1.36419334189431	0.564140286774415	0.572658662358312	0.900637088840378
ENSMUSG00000027580.17	2.91705041707266	1.19970256571412	2.14657080229887	0.558892613478809	0.57623501081753	NA
ENSMUSG00000067158.9	5.33005388072629	-0.0150936534733137	1.6091791215765	-0.00937972241308142	0.992516174038974	0.999103799746252
ENSMUSG00000048126.16	84.6671423147791	4.08109173123486	0.755720488819287	5.40026609257482	6.65421219148356e-08	2.15169601014425e-05
ENSMUSG00000054823.16	599.510275868404	-0.80665371644296	0.495525185593596	-1.62787632171846	0.103551113074448	0.791186343380353
ENSMUSG00000049001.5	6.55902381357988	-0.621782665875062	1.48118306824802	-0.419787856885593	0.674640436521621	0.929920938369677
ENSMUSG00000049470.13	1624.16081070056	-0.830179897116164	0.473465830004143	-1.75341037199855	0.0795315919258643	0.755627995847732
ENSMUSG00000073514.4	192.291760497926	-0.244833808293208	0.48412925496473	-0.505719920418865	0.613053281924405	0.910906446440078
ENSMUSG00000021928.9	993.236380750646	0.335411644239046	0.430363419656766	0.779368387086783	0.435762740454918	0.867930343882203
ENSMUSG00000036334.12	64.5655650045995	-1.05800959837688	0.644983178383247	-1.6403677395571	0.100928728787599	0.790256855363414
ENSMUSG00000032743.15	906.982314368307	-0.266787737810972	0.421522979866202	-0.632913863665641	0.526789893924167	0.888394157441629
ENSMUSG00000031004.8	671.075244558842	-0.231633005883664	0.431318120531543	-0.537035183215133	0.591243311441883	0.905193920174526
ENSMUSG00000025153.9	19196.8662618674	0.185839155862399	0.472182059730169	0.393575215391703	0.69389468259283	0.933762155611596
ENSMUSG00000046532.8	8.0883437469747	0.0675857762887685	1.35566055473927	0.0498544979069387	0.960238337591554	0.993725060213204
ENSMUSG00000070565.11	683.974913257474	-0.701866369798442	0.532028844880392	-1.31922615954447	0.18709351523504	0.825116597507205
ENSMUSG00000009487.10	9.05826527962269	-1.20004309152922	1.54533833818367	-0.776556862583053	0.437420260371031	0.867930343882203
ENSMUSG00000045039.9	6304.64357051497	0.464604839784913	0.504158633683996	0.921544943879954	0.356765987693261	0.853425683692542
ENSMUSG00000040710.10	16.3951540937833	-1.35801367212885	1.16826444436336	-1.16241975751379	0.24506500164611	0.833143835152256
ENSMUSG00000026014.15	167.049109847798	0.549206755146576	0.489798538417246	1.12129112700357	0.262163961199169	0.836334801926177
ENSMUSG00000033257.14	1349.77053292716	-0.707026955035018	0.464384311463454	-1.52250396402691	0.127882852918644	0.807025597785238
ENSMUSG00000026019.15	1374.83713483301	-0.100133610142791	0.424338127406926	-0.235975991020874	0.813451300513352	0.962747894970423
ENSMUSG00000044447.5	133.700514424285	0.0592822270295479	0.600002579011644	0.0988032870245335	0.921294458598285	0.986150715886986
ENSMUSG00000039967.14	338.630524652077	-0.0411701276296969	0.459409444266092	-0.0896153271195075	0.928592904135292	0.98832617556483
ENSMUSG00000055322.15	438.965145394001	0.624159657210874	0.466081062342203	1.33916545348201	0.180516816171855	0.821273097410324
ENSMUSG00000055320.17	615.808028918263	-0.139330547920582	0.426605335896913	-0.326602918896098	0.743968235554435	0.945609069907255
ENSMUSG00000069601.14	128.792960302244	0.187744629818567	0.581112347006883	0.323078025764858	0.746636151536227	0.945817679112996
ENSMUSG00000020181.16	842.880047226968	-0.258613397843371	0.473374519523699	-0.546318796591719	0.584846817793719	0.903633678628629
ENSMUSG00000031558.15	86.3158918615718	-1.96625004096906	0.624958263750795	-3.14621016316877	0.00165401106667592	0.109024775618046
ENSMUSG00000117068.2	0	NA	NA	NA	NA	NA
ENSMUSG00000054280.14	440.309119592829	-0.873442784236184	0.55320079824796	-1.57888923335335	0.114361465996365	0.798853121804961
ENSMUSG00000024548.11	136.068843910061	0.054745172066129	0.550819994540376	0.0993884982548797	0.920829814610432	0.986138934124451
ENSMUSG00000041308.6	677.480707824577	0.0896685585403817	0.502497825971868	0.178445664649307	0.858372989544769	0.971101450208769
ENSMUSG00000049658.13	211.700287712414	-0.864004403274513	0.576421159429763	-1.4989116709894	0.133896548233382	0.809895303977135
ENSMUSG00000021068.16	689.819411878236	-0.59161023831691	0.476686179702603	-1.24108955431854	0.214572667914983	0.829231175924863
ENSMUSG00000049336.16	24.4295432486542	0.26142041031161	0.841105308921493	0.310805802244687	0.75594825845073	0.9479588880737
ENSMUSG00000020014.17	49.0745435505523	-1.29472430292196	0.687784713571212	-1.8824557704973	0.0597741597579201	0.727484095118026
ENSMUSG00000005268.20	0	NA	NA	NA	NA	NA
ENSMUSG00000028399.18	275.534397489919	-0.936144252625981	0.554615310748902	-1.68791635297968	0.0914272870356015	0.780057733093035
ENSMUSG00000091670.2	0	NA	NA	NA	NA	NA
ENSMUSG00000020961.15	228.317957199602	-1.71018290005188	0.500400430957236	-3.41762875139897	0.000631692081195083	0.0538603924752305
ENSMUSG00000028080.16	350.599441317486	-0.731336970959045	0.548015430515416	-1.33451893913135	0.18203384418	0.821273097410324
ENSMUSG00000115791.1	0	NA	NA	NA	NA	NA
ENSMUSG00000032186.15	912.256331486247	-0.892217137448356	0.551629898945028	-1.61741983013373	0.105787688095888	0.791186343380353
ENSMUSG00000021188.14	262.531029409589	-1.3488503910018	0.584210344982924	-2.30884372826576	0.02095225450449	0.52665085187735
ENSMUSG00000030102.11	2179.48498656797	-0.213688450292245	0.449318639565859	-0.475583319887897	0.634371261045053	0.919001838420194
ENSMUSG00000033952.14	373.344312476287	-1.20641643465574	0.558756508545874	-2.15910940848879	0.0308416799092987	0.599959943570445
ENSMUSG00000024026.13	7362.8357842563	-0.330034497044037	0.43462707906959	-0.759350976820278	0.447642630781647	0.870846287624135
ENSMUSG00000038679.16	598.810898543682	-0.461063419290693	0.457141576883434	-1.0085790542921	0.313176556766411	0.843699396612436
ENSMUSG00000025326.12	623.847780606952	-0.527612395226616	0.498119155572812	-1.05920920591758	0.289504513395289	0.839689233901408
ENSMUSG00000041415.10	783.360903644509	-0.850714766342902	0.523998045370467	-1.62350751850886	0.104480957446085	0.791186343380353
ENSMUSG00000015501.10	261.687487184359	-0.233962464372411	0.587221149574905	-0.398423089055595	0.690318341107582	0.932372099765866
ENSMUSG00000022914.17	1778.45136890537	-0.139359476002331	0.434974625453359	-0.320385300308223	0.748676267408974	0.946043406253881
ENSMUSG00000075316.11	0	NA	NA	NA	NA	NA
ENSMUSG00000034912.17	400.753346860018	-0.0687616357147913	0.456314973786637	-0.150688975082687	0.880221070530399	0.975453175719945
ENSMUSG00000030313.15	280.451386246031	-0.722136613137509	0.534234710708216	-1.35172162845839	0.176464383407857	0.820335994164243
ENSMUSG00000022558.16	897.10544586657	0.365817297073349	0.498777540808559	0.733427765172284	0.463297569952474	0.874288355668279
ENSMUSG00000022811.17	856.561652606426	0.0304144999422957	0.424121928725617	0.0717116892156079	0.942831353466303	0.990756253338985
ENSMUSG00000039419.17	10.8223304156788	1.49175109157261	1.33506759320826	1.11735997425256	0.263840441723155	0.837806902889719
ENSMUSG00000038738.15	8.50084763881535	0.928437222050144	1.40113325717652	0.662633063125685	0.507565589349027	0.88395960895225
ENSMUSG00000037697.19	1198.89750374306	-0.624346908402177	0.475245597564539	-1.31373528045652	0.188935303887691	0.825325654482975
ENSMUSG00000034218.16	275.861876114041	-0.716195628911293	0.603821397532947	-1.18610508312139	0.235580803400972	0.832237885230054
ENSMUSG00000111389.1	0	NA	NA	NA	NA	NA
ENSMUSG00000108218.2	21.5284128536476	-0.223789458955443	0.897992854008666	-0.249210734758568	0.803197776201581	0.960173230557269
ENSMUSG00000050600.5	0	NA	NA	NA	NA	NA
ENSMUSG00000027806.9	495.874669323125	-0.271225983713237	0.508786144511034	-0.533084453339225	0.593975120420226	0.905521835996765
ENSMUSG00000023087.15	475.408550229905	-0.114698600492134	0.504198255747257	-0.227487102909832	0.820044996758963	0.962747894970423
ENSMUSG00000031292.14	140.108769850372	-1.1303545760426	0.612965724437592	-1.84407468636149	0.0651722564465253	0.742913389504527
ENSMUSG00000070458.5	0	NA	NA	NA	NA	NA
ENSMUSG00000016756.17	0	NA	NA	NA	NA	NA
ENSMUSG00000031196.13	38.8197549588652	-0.201727872236713	0.747520889948207	-0.269862521501827	0.787266021256538	0.954897873152626
ENSMUSG00000022416.15	6.79176284995018	2.33750151522539	1.55160097164406	1.50650944279095	0.131936444915827	0.808700569730842
ENSMUSG00000066900.11	7411.85135172269	0.476369158711442	0.437060684904036	1.08993825151772	0.275740345280572	0.839290322368936
ENSMUSG00000027009.18	156.062563876789	-1.0434413298364	0.567267130133067	-1.83941792924198	0.0658537390100069	0.743306148851448
ENSMUSG00000055026.13	5.23412405771228	2.34576255260995	1.9357973090432	1.21178107937829	0.225596192828692	0.829231175924863
ENSMUSG00000114854.1	0.674177554369854	-2.76316660292946	4.71528072347609	-0.58600256590714	0.557873790540988	NA
ENSMUSG00000045210.8	303.97321892906	-1.06385923701485	0.521778934095113	-2.03890798860983	0.0414592114741171	0.669677630766653
ENSMUSG00000056812.14	0	NA	NA	NA	NA	NA
ENSMUSG00000029238.11	141.484397868615	-0.600964595733043	0.534134423149619	-1.12511863996585	0.260538763552588	0.836276597713788
ENSMUSG00000090066.2	0.664543299850335	-0.732920397427136	4.80757965685352	-0.15245101480166	0.878831223267192	NA
ENSMUSG00000026442.14	374.899545952812	-0.0706614290924457	0.464811395190276	-0.152021722839905	0.87916980243213	0.975453175719945
ENSMUSG00000004113.18	341.323375066559	0.164517633246969	0.447326813613173	0.367779503129083	0.713037653628361	0.9381095419377
ENSMUSG00000075324.13	15.0660739503315	-0.825575660167235	1.12560257936195	-0.733452175132022	0.463282686756532	0.874288355668279
ENSMUSG00000002413.15	204.735652376719	-0.806620657741891	0.507556338365945	-1.58922388860076	0.112009855045441	0.796524853016085
ENSMUSG00000066372.6	0	NA	NA	NA	NA	NA
ENSMUSG00000101599.1	24.9026313809954	-1.65440129434353	0.933104311861021	-1.77300787630476	0.0762274017497472	0.753773617904001
ENSMUSG00000024594.9	726.909118711298	0.0430538299197762	0.423199651133852	0.101734086510764	0.91896774537879	0.985746336627759
ENSMUSG00000039087.17	437.850918613051	-0.38225497362711	0.44576220001766	-0.85753115363296	0.391151405114439	0.858285420121816
ENSMUSG00000029229.8	1243.67586798856	-0.0262491751998585	0.424722024214725	-0.0618031882109034	0.950719564518384	0.992296536879148
ENSMUSG00000059049.14	39.8010995604001	0.603013728622966	0.798435550806031	0.755244087032717	0.450102540307204	0.871927817221244
ENSMUSG00000034377.10	3401.56891697765	-0.491309601092212	0.567108361287067	-0.866341663482394	0.386302824818301	0.858285420121816
ENSMUSG00000020661.15	3432.63718665405	-0.46333062650571	0.418657248997932	-1.10670632746645	0.268420918794772	0.839290322368936
ENSMUSG00000047747.10	144.835118176897	-0.366537285218754	0.551648299867961	-0.664440161070895	0.506408635722343	0.88395960895225
ENSMUSG00000073608.4	0.214951870793757	-1.14900650751966	4.9950726440521	-0.23002798745837	0.818070021930774	NA
ENSMUSG00000027677.17	208.578725604542	-1.39092381986228	0.652268820678214	-2.13243953377386	0.0329707303163812	0.611528545630023
ENSMUSG00000039840.8	729.192953327582	-0.551096223938197	0.424229056625676	-1.29905346022647	0.193925583177462	0.826694534778231
ENSMUSG00000015968.17	26.5944219645122	-0.559436338857435	0.890733042753746	-0.628062856103226	0.529962764424742	0.889312557719356
ENSMUSG00000070855.8	0	NA	NA	NA	NA	NA
ENSMUSG00000054263.12	1344.59404288823	-0.796231408354178	0.485428522113379	-1.64026498667132	0.100950082309814	0.790256855363414
ENSMUSG00000038121.6	713.664602993102	-0.742330688377311	0.643828718337797	-1.15299406073998	0.248912822292515	0.833143835152256
ENSMUSG00000051118.9	0.214951870793757	-1.14900650751966	4.9950726440521	-0.23002798745837	0.818070021930774	NA
ENSMUSG00000078632.3	0	NA	NA	NA	NA	NA
ENSMUSG00000059921.15	24.7645793322602	-0.365948756282287	0.891891038109954	-0.410306574060644	0.681581070194238	0.930622993428448
ENSMUSG00000026219.14	1863.91837781741	-0.986063889421179	0.545649787827882	-1.80713694281179	0.0707409297968555	0.750686102079572
ENSMUSG00000041258.18	1248.30287010035	-0.524288213970627	0.49829189453464	-1.05217086555314	0.292721163753127	0.839689233901408
ENSMUSG00000033400.14	1028.26650181391	-0.735112365875394	0.460053025712983	-1.59788616700462	0.110068313186535	0.792299694108692
ENSMUSG00000043909.16	2906.47594196733	-0.174514940965569	0.422098245213038	-0.413446260307216	0.679279687558628	0.930581952465669
ENSMUSG00000094921.2	0.429903741587514	-2.1196455349258	4.8955512206099	-0.432973824480122	0.665033786086064	NA
ENSMUSG00000019899.16	22.8531864737107	2.46194114243938	0.956766453824587	2.5731892381866	0.0100766094351331	0.358881574511503
ENSMUSG00000024384.4	1029.04055953504	-0.586620376358283	0.498362389883041	-1.17709600135747	0.239157190926484	0.832237885230054
ENSMUSG00000003226.7	443.351577310531	-0.711122368358698	0.522866874593808	-1.36004478943352	0.17381575072839	0.820335994164243
ENSMUSG00000095448.3	0	NA	NA	NA	NA	NA
ENSMUSG00000054889.10	1.15309092541502	-1.81648445865569	3.86420323112577	-0.470079949218014	0.638297898867516	NA
ENSMUSG00000042567.20	7.71385053460197	-2.61575902524851	1.4938726225021	-1.75099200952445	0.0799472864077496	0.756119255484415
ENSMUSG00000055024.12	609.371885369231	-0.327255180231375	0.424054679631427	-0.771728732048928	0.440275109686669	0.869069939096315
ENSMUSG00000042599.8	102.939908921992	-0.671451767291486	0.578562621529879	-1.16055158474632	0.245824304199054	0.833143835152256
ENSMUSG00000064115.13	115.828088983588	-1.48748927351607	0.574669771030597	-2.58842442825633	0.00964161005633674	0.34786929083263
ENSMUSG00000035877.17	3239.77327689025	-0.78716904754077	0.451784505502382	-1.74235512274916	0.0814463234638629	0.758380504605115
ENSMUSG00000057182.14	47.1712056335385	-1.43706693345676	0.724605134175119	-1.98324144513922	0.0473404664993013	0.686396713083778
ENSMUSG00000032666.16	1420.37235771377	0.263764754687932	0.477583035013145	0.552290880015602	0.580749077984183	0.902591611362376
ENSMUSG00000021578.17	1178.94199683755	-0.925940094504514	0.573634099919841	-1.61416501326177	0.106491638620318	0.791186343380353
ENSMUSG00000078515.4	1060.91586102454	-0.578064530617188	0.4938950287179	-1.17041982001273	0.241832063388534	0.832237885230054
ENSMUSG00000092049.9	0	NA	NA	NA	NA	NA
ENSMUSG00000032827.15	262.35279466615	-0.708905744186494	0.572391210398495	-1.23849865495481	0.215531220502847	0.829231175924863
ENSMUSG00000055088.5	0.539654662954109	0.393081480992551	4.96888791415875	0.0791085425518399	0.936946288836663	NA
ENSMUSG00000034551.12	21.6694358329701	-0.634971064437824	0.974045804183085	-0.651890354345669	0.514471907803305	0.885776527620358
ENSMUSG00000048038.8	21.1013873107466	0.542264355648982	0.915522309610471	0.592300537034101	0.553649356355664	0.896913003991245
ENSMUSG00000032796.8	1051.12296932287	0.402072399139865	0.417944899836493	0.962022504155842	0.336038299718753	0.845232338610262
ENSMUSG00000028565.18	1838.65171275338	-1.10405327057829	0.485821685679646	-2.27254835080851	0.0230534111351389	0.548735222269458
ENSMUSG00000090581.9	0	NA	NA	NA	NA	NA
ENSMUSG00000118318.1	0.234639558262821	1.6664677880616	4.98744180465523	0.334132778553152	0.738279366382608	NA
ENSMUSG00000073530.11	0.429903741587514	-2.1196455349258	4.8955512206099	-0.432973824480122	0.665033786086064	NA
ENSMUSG00000029516.19	1031.67343973412	-0.0883976581506787	0.444348701699681	-0.198937586207742	0.842311567550377	0.967852138608692
ENSMUSG00000020532.18	2448.36206919105	-0.817514742893561	0.407158377942111	-2.00785440551537	0.0446587654665175	0.674943131571634
ENSMUSG00000048271.14	900.424358530658	-0.325584314081377	0.417916113458925	-0.779066189591603	0.435940725515209	0.867930343882203
ENSMUSG00000111465.1	8.28522859369584	0.142737845258019	1.36750047429538	0.104378644059752	0.916868869669394	0.985619326117122
ENSMUSG00000026020.9	1035.8528657135	-0.636136264104883	0.512881195628491	-1.24031894623345	0.214857447377915	0.829231175924863
ENSMUSG00000026923.15	9535.89585430628	-0.607479999147625	0.424427128016196	-1.43129399382889	0.152345974569762	0.815951612175072
ENSMUSG00000005045.16	75.2894174454556	0.30051969821457	0.607122658736293	0.494990087901006	0.620607117321783	0.914616976340117
ENSMUSG00000051166.10	75.1777669236712	-1.00908013157388	0.711403842940105	-1.41843503038097	0.156063794362032	0.815951612175072
ENSMUSG00000025757.12	542.851490587191	-1.10145635608846	0.585581753063871	-1.88096085700321	0.0599772437028915	0.727484095118026
ENSMUSG00000074212.7	441.961732307275	-0.624958374694852	0.439645311187982	-1.42150583388716	0.155169758787123	0.815951612175072
ENSMUSG00000008206.16	49.5215872209224	2.16741985421233	0.722059094181695	3.00172087253974	0.00268458208408368	0.150847107400086
ENSMUSG00000021301.9	0	NA	NA	NA	NA	NA
ENSMUSG00000030643.14	132.24756276224	-0.557076393969305	0.5557472906775	-1.00239156054218	0.316154516553871	0.843699396612436
ENSMUSG00000021510.11	45.6348993798894	-0.579148170838606	0.701137060065287	-0.826012778135958	0.408796843261138	0.861011377720667
ENSMUSG00000020589.17	745.814184232305	-1.05326719553463	0.548632106740388	-1.91980597306354	0.0548824121213828	0.713141405029076
ENSMUSG00000032423.12	929.6932114729	-0.848961133158371	0.597863506660205	-1.41999155944615	0.155610138351574	0.815951612175072
ENSMUSG00000024998.17	1443.9569975332	-1.06170390979294	0.47465264028228	-2.23680186243468	0.0252992927791642	0.561113789703482
ENSMUSG00000056073.16	217.788711270468	-0.636443086567952	0.517610886915254	-1.22957824623993	0.218855080301868	0.829231175924863
ENSMUSG00000090417.4	0	NA	NA	NA	NA	NA
ENSMUSG00000022141.7	202.919099563742	-0.88910512474145	0.490905061246055	-1.81115493591501	0.0701168716860649	0.750623563387751
ENSMUSG00000027784.10	3491.15347472845	-0.856363165017551	0.465338957988482	-1.84029974348021	0.0657242430251957	0.743306148851448
ENSMUSG00000115021.1	0	NA	NA	NA	NA	NA
ENSMUSG00000073077.6	0	NA	NA	NA	NA	NA
ENSMUSG00000026516.8	1292.57460381829	-0.437838993204045	0.471962794690681	-0.927698111227177	0.353564188502446	0.852147607661997
ENSMUSG00000090304.4	0	NA	NA	NA	NA	NA
ENSMUSG00000066440.5	806.207275268667	-0.0876208784789535	0.440353247088063	-0.198978613325476	0.842279474171582	0.967852138608692
ENSMUSG00000072501.5	390.658503519643	-0.362456946605315	0.480094601006849	-0.754969845203787	0.450267075697451	0.871927817221244
ENSMUSG00000032740.16	341.340677152462	-0.738745095783814	0.514771002491087	-1.43509461917798	0.151260136676954	0.815951612175072
ENSMUSG00000030201.15	1305.07993728381	-0.854659108006691	0.498120751493685	-1.7157669208598	0.0862047108249371	0.765083549517231
ENSMUSG00000022016.16	555.354546826629	-1.13059864318267	0.578436760418631	-1.95457605834806	0.050633129474282	0.696988411992164
ENSMUSG00000005534.10	1132.69465928846	-0.840544275558398	0.419938397317948	-2.00158947342459	0.0453289020750619	0.678086869536839
ENSMUSG00000039477.16	1915.59186471501	0.265231283058702	0.4396601958713	0.603264260784578	0.546332904344933	0.893528026542368
ENSMUSG00000001151.10	1556.64030188827	-0.662304915591863	0.406195389570115	-1.63050820515908	0.102994132471501	0.791186343380353
ENSMUSG00000034427.17	0.759633250222638	1.30346555316098	4.1949170398653	0.310724989498919	0.756009698124508	NA
ENSMUSG00000021427.10	5083.43178434884	-0.579955059677962	0.510489921833234	-1.13607543434995	0.255924995147687	0.83506523083802
ENSMUSG00000079259.2	196.18405012218	-0.422185860385835	0.493300564988416	-0.855838996243091	0.392086841845851	0.858285420121816
ENSMUSG00000117286.1	0	NA	NA	NA	NA	NA
ENSMUSG00000102758.3	8.00863950802777	-0.0394050512048094	1.38326680797389	-0.0284869491392822	0.977273776884384	0.997277209207324
ENSMUSG00000053852.11	0	NA	NA	NA	NA	NA
ENSMUSG00000060371.12	1.10910801243214	-1.74972767825074	3.58869037398763	-0.487567189115428	0.625856440805845	NA
ENSMUSG00000035133.9	254.292060860157	-0.911698746825413	0.527155712948587	-1.72946764007531	0.0837254332528401	0.761080723070242
ENSMUSG00000045350.15	0.899182858113156	0.147090685012917	4.19619500674942	0.0350533482777439	0.972037201210611	NA
ENSMUSG00000050310.9	217.39359461303	-0.56684158559779	0.492335130751366	-1.15133280197316	0.249595347380948	0.83328917909799
ENSMUSG00000024109.18	3441.94684455023	-0.227876016049042	0.413567904370527	-0.5510002435897	0.581633507582245	0.902625824544728
ENSMUSG00000040661.6	1695.16995160886	-0.419581162804236	0.446481223652148	-0.939750969530423	0.347345313961909	0.848873089458508
ENSMUSG00000034602.15	2607.49131924798	-0.336951315482049	0.410634665082232	-0.820562276237863	0.411895642729292	0.861132175618031
ENSMUSG00000018076.12	906.908714108393	-0.367846848612548	0.434421185011982	-0.84675163482739	0.397133571477073	0.858285420121816
ENSMUSG00000036192.15	211.306038268395	-0.795984573979572	0.513422571442851	-1.55034978641988	0.121057583723209	0.801999230979138
ENSMUSG00000091345.9	2.74153148732234	0.105377782073063	2.39045140638308	0.044082796157947	0.964838406129931	NA
ENSMUSG00000033849.3	28.2534683372692	-1.48465456273592	1.04454600646941	-1.42133956143692	0.155218067653623	0.815951612175072
ENSMUSG00000074224.3	0	NA	NA	NA	NA	NA
ENSMUSG00000043279.9	245.453460780784	-0.883789463119967	0.504580810891911	-1.75153205203693	0.079854305220456	0.756119255484415
ENSMUSG00000025997.13	77.1464105328128	-0.947806065593962	0.609103274851823	-1.55606791939271	0.119691942539455	0.801214862689238
ENSMUSG00000016200.14	40.9630534373921	-0.652246259104191	0.709861358232218	-0.918836124181338	0.358181294448131	0.85370634881366
ENSMUSG00000090112.8	463.34799356145	-0.737438864891145	0.546397502532805	-1.34963805923851	0.177132109768177	0.820335994164243
ENSMUSG00000026380.10	3.46974538762462	0.264237034242507	2.254589497054	0.117199620856825	0.90670186736188	NA
ENSMUSG00000067010.4	0	NA	NA	NA	NA	NA
ENSMUSG00000041642.18	2601.02986470163	-0.281271976045951	0.435974940064726	-0.645156292708458	0.518825906989091	0.886864309478743
ENSMUSG00000062200.14	0	NA	NA	NA	NA	NA
ENSMUSG00000025650.13	5.77618169059922	1.40900512740608	1.61312476939901	0.873463202682717	0.382410654620156	0.858285420121816
ENSMUSG00000031026.15	40.9503508515491	-0.0932384009498645	0.779522013352928	-0.1196097087096	0.904792328505081	0.982198904503705
ENSMUSG00000040537.17	282.38533371551	-0.945062271026814	0.567049769495311	-1.66663020049888	0.0955879598661723	0.783071919783203
ENSMUSG00000037487.7	1818.86844410391	-1.03269494223441	0.503082837586523	-2.05273339712528	0.0400984411442082	0.662746681372758
ENSMUSG00000048012.19	26.351458312658	-1.46124157927217	0.902032141253774	-1.61994402687373	0.105244301161258	0.791186343380353
ENSMUSG00000027737.10	72.7828197776499	0.366229822237869	0.626220028119563	0.584826108704313	0.558664646986993	0.89798489258796
ENSMUSG00000063626.6	9.89640128382585	-0.699636255256824	1.28561078973965	-0.544205338692366	0.586300178461071	0.903658485532089
ENSMUSG00000001569.10	1167.34416138843	-0.356522446201555	0.452041198532176	-0.788694586597904	0.430290532648103	0.866038655140715
ENSMUSG00000070337.4	1004.12390583709	-1.16761010942404	0.426629899268845	-2.7368220357389	0.00620358429936229	0.258051038161337
ENSMUSG00000049553.11	3314.08793695098	0.254095424180785	0.402525939756282	0.631252297267183	0.527875572100397	0.888394157441629
ENSMUSG00000021745.14	2055.92991440972	-0.637027295977535	0.450547141566034	-1.41389709801137	0.157392118143331	0.815951612175072
ENSMUSG00000071226.11	357.074220407992	-0.839436760777918	0.525400657018716	-1.59770786268357	0.110108008088217	0.792299694108692
ENSMUSG00000051586.16	792.002777058518	-0.282634522071243	0.416043413463059	-0.679339013490567	0.496923082230608	0.881108998545362
ENSMUSG00000050315.14	23.7464895585779	-1.42703749207737	0.888992667847743	-1.60522976587899	0.108443249126955	0.791186343380353
ENSMUSG00000034973.16	263.338784731456	-1.00823974595783	0.597750275358236	-1.68672401757337	0.0916564316348689	0.780057733093035
ENSMUSG00000040943.12	245.311688576153	-1.22353094892784	0.605277369603188	-2.02143845181254	0.0432343976377045	0.67299104301114
ENSMUSG00000037926.15	451.260984799451	-0.749547238112489	0.532130403947634	-1.40857810895964	0.158959955652088	0.815951612175072
ENSMUSG00000020135.13	1934.81525987749	0.28502195935338	0.484823079693694	0.587888595430427	0.556607071873027	0.89798489258796
ENSMUSG00000031529.5	1237.11866441409	-0.941907107538388	0.440312603422863	-2.13917816618529	0.0324212417637034	0.61058817730368
ENSMUSG00000097767.8	114.272074848217	0.0572850748253764	0.560259656964701	0.102247367114969	0.918560331216952	0.985746336627759
ENSMUSG00000026834.13	0.95489743354733	-1.12957177339818	4.15368735446849	-0.271944341738431	0.785664815777168	NA
ENSMUSG00000026490.18	485.94733035947	-0.950200162343402	0.566163098812629	-1.67831524932689	0.0932855726366794	0.781245657902783
ENSMUSG00000090751.2	0	NA	NA	NA	NA	NA
ENSMUSG00000036030.9	170.369325704749	0.346393354133272	0.485950019008178	0.712816834209121	0.475959107223357	0.874341358146023
ENSMUSG00000047793.13	455.64120636913	-2.02199226480847	0.45257793945667	-4.46772166410921	7.90570753250014e-06	0.00150542239657764
ENSMUSG00000058230.12	7226.31995646658	-0.880045968973154	0.554167479826256	-1.58805054610759	0.112274909797756	0.79755514569615
ENSMUSG00000040929.17	390.201988749721	-0.00436747002036459	0.439282791332383	-0.00994227433111521	0.992067343501106	0.999004062102471
ENSMUSG00000055980.2	790.869334841461	-0.758749085387468	0.444135066161713	-1.70837464365221	0.0875668490608906	0.766161912080717
ENSMUSG00000050296.14	11.5471973447897	-0.833287457078129	1.18588466642088	-0.702671584069869	0.482260440256166	0.87556409496556
ENSMUSG00000027787.14	632.869355399111	-0.373377415151929	0.500791541967253	-0.745574523254119	0.455924477633802	0.872110568921445
ENSMUSG00000052372.10	0.429903741587514	-2.1196455349258	4.8955512206099	-0.432973824480122	0.665033786086064	NA
ENSMUSG00000090961.2	0	NA	NA	NA	NA	NA
ENSMUSG00000032009.8	3558.52177938766	-0.793240643966437	0.457145624226062	-1.73520340549989	0.0827047835218272	0.759575970358038
ENSMUSG00000026872.17	558.219823046898	-0.46897277147268	0.526207199404962	-0.891232145822021	0.37280464225333	0.855344219410791
ENSMUSG00000117853.1	2.7083843138254	-0.97577742516828	2.41465392752661	-0.404106532221697	0.686134381660539	NA
ENSMUSG00000008575.17	1557.53485351733	-0.700006215676373	0.462691183752594	-1.51290156427678	0.130304664520724	0.807025597785238
ENSMUSG00000022656.15	1400.48716325426	-0.452923223979634	0.43777166738149	-1.03461063775272	0.30085078403707	0.841502226958212
ENSMUSG00000031540.13	1131.89779247261	-0.817520421864502	0.479549256816773	-1.70476840542131	0.088237626211296	0.769594940871074
ENSMUSG00000035523.8	0	NA	NA	NA	NA	NA
ENSMUSG00000020315.18	2574.88127527858	-1.08900317057353	0.481280463125571	-2.26272050085149	0.0236529242431608	0.550301325929527
ENSMUSG00000044021.14	0	NA	NA	NA	NA	NA
ENSMUSG00000052613.16	3.24641831338307	-1.64921103300369	2.09511374569967	-0.787170165051316	0.431182259797603	NA
ENSMUSG00000091259.2	0	NA	NA	NA	NA	NA
ENSMUSG00000051111.16	347.191885791769	-1.61942765792973	0.445567523506909	-3.63452804006847	0.000278489969397941	0.0284092922353686
ENSMUSG00000025278.9	3355.46584906527	0.335652527877118	0.403121820930018	0.832632991939644	0.405051746255184	0.86037625148221
ENSMUSG00000034755.18	182.617480905874	-0.883406128981896	0.568713089031673	-1.55334235490525	0.120341366588216	0.801999230979138
ENSMUSG00000031965.15	6.28500888037894	-1.24138875951062	1.52423273147589	-0.814435180320927	0.41539569160035	0.861132175618031
ENSMUSG00000078671.11	962.37398459627	-0.673040605938541	0.449282643855164	-1.49803384382574	0.134124457616374	0.809895303977135
ENSMUSG00000027288.16	2586.2894221587	-1.12921087008874	0.61088261744386	-1.84849075394179	0.0645313807258501	0.742659279496764
ENSMUSG00000092060.4	251.233944719059	-0.522104095948036	0.513174667784598	-1.0174003681865	0.308963006941883	0.842617443184276
ENSMUSG00000064325.4	70.2560365472014	-1.05982795736398	0.637929530356694	-1.66135585034195	0.0966419992148456	0.786443771388425
ENSMUSG00000031285.14	9.61777084054966	0.514755886405316	1.54220627965888	0.333778881071068	0.7385464208585	0.945183443142132
ENSMUSG00000039716.12	499.146391586521	-0.712974468968521	0.500076893822477	-1.42572967832747	0.153946386309482	0.815951612175072
ENSMUSG00000090411.2	0	NA	NA	NA	NA	NA
ENSMUSG00000037795.14	194.034170748915	-1.2243755239974	0.534445328909719	-2.29092754257045	0.0219676047075282	0.53572951885705
ENSMUSG00000068699.12	68.8332001521859	2.35811624568277	0.68845280328947	3.42524024074787	0.000614256001116326	0.0529000972217668
ENSMUSG00000018501.17	1914.24989252245	-0.932920547406447	0.523038971131274	-1.78365398927855	0.0744799068915497	0.753773617904001
ENSMUSG00000074994.5	141.142797377595	-0.784980909010802	0.565276656252872	-1.38866677108925	0.164934103024442	0.816068065166812
ENSMUSG00000030084.11	5982.95178237692	0.195885406503561	0.462964636578865	0.423110948497235	0.67221431469243	0.929038811675851
ENSMUSG00000030016.14	559.69047689719	-0.420276754414376	0.466727362484866	-0.900475927052602	0.367867030600932	0.855344219410791
ENSMUSG00000037470.14	4704.42787986505	-0.721999937465744	0.41353237603229	-1.74593327950063	0.0808225462269743	0.758380504605115
ENSMUSG00000094672.2	0	NA	NA	NA	NA	NA
ENSMUSG00000030852.17	3018.55448723707	0.170702467247583	0.411210206417688	0.415122155489962	0.678052481230797	0.9304707933856
ENSMUSG00000054414.4	1167.56379803989	-0.631259941563815	0.43659820431482	-1.44586014171654	0.148216433371104	0.815951612175072
ENSMUSG00000030657.11	3787.34559753926	-0.529155880138226	0.412891220603311	-1.28158665947179	0.19998768242563	0.827154552458072
ENSMUSG00000058656.13	52.3763773336174	-1.08898600150375	0.676082941794262	-1.61072840946656	0.107238930788002	0.791186343380353
ENSMUSG00000035247.16	1756.51921610053	-0.884864909388975	0.538146630631792	-1.64428216962007	0.100117930645803	0.790256855363414
ENSMUSG00000078606.8	0	NA	NA	NA	NA	NA
ENSMUSG00000045868.12	0	NA	NA	NA	NA	NA
ENSMUSG00000074899.5	6.68050639739778	-0.545767963837722	1.47246439989577	-0.37064934396808	0.71089872454139	0.937559282673717
ENSMUSG00000030283.7	712.919946599612	-0.199301450076089	0.446068820674513	-0.446795294445192	0.655022869133706	0.924541420788457
ENSMUSG00000042644.9	62.8847656961954	-0.31912779990083	0.627745113524184	-0.508371619349188	0.611192752165699	0.91042361782035
ENSMUSG00000042272.17	521.066302537103	-0.66529862515463	0.456203449042765	-1.45833756090753	0.144747521900295	0.815951612175072
ENSMUSG00000051985.12	1.14806420894024	-3.52987514763006	4.18653990658473	-0.843148572901013	0.399145356044531	NA
ENSMUSG00000037541.21	50.5029360726489	0.341365860593298	0.669847479048306	0.509617295385359	0.610319604592427	0.910368346711849
ENSMUSG00000029655.17	800.683052299111	-0.392134403617661	0.542063888464468	-0.723409937394059	0.469428067769571	0.874341358146023
ENSMUSG00000001985.9	1307.64785112445	-1.18967423238016	0.408694881443748	-2.91091052615472	0.0036037719958748	0.181193098468854
ENSMUSG00000044033.16	550.444258941965	-0.969209152399292	0.498263917701433	-1.94517226306573	0.0517542489428363	0.701157563938599
ENSMUSG00000006262.15	170.584791948652	-0.542041203446174	0.493308584222752	-1.09878729213724	0.271860856441116	0.839290322368936
ENSMUSG00000031561.16	1563.69468636384	-0.412349662449396	0.448049689363051	-0.920321277391339	0.357404893278843	0.853568152315052
ENSMUSG00000013076.17	9041.79916286637	0.0206855489814331	0.415309623788141	0.0498075358638576	0.960275761387732	0.993725060213204
ENSMUSG00000040260.8	632.515909525619	-0.24726274609979	0.435410639060487	-0.567884024683744	0.570113720196447	0.900176199104595
ENSMUSG00000032525.15	674.163361389997	-0.708601179006657	0.500285017064754	-1.41639496454266	0.156659897406082	0.815951612175072
ENSMUSG00000075376.10	520.229881539948	-0.615012951583423	0.498598350660411	-1.23348372646804	0.217395344525839	0.829231175924863
ENSMUSG00000041498.13	313.689739006577	-0.744225287002403	0.4791029007794	-1.55337253394147	0.120334160714475	0.801999230979138
ENSMUSG00000014355.10	5826.63458080615	-0.799515225613765	0.455302605016517	-1.75600845856079	0.0790869642797814	0.755366858775247
ENSMUSG00000075318.12	82.9064259928638	-0.0678045919521606	0.616825040226649	-0.109925161156308	0.912468727745977	0.983515942753523
ENSMUSG00000029202.12	812.66637489831	-0.929128223974518	0.525565226546647	-1.76786472362256	0.0770835214357516	0.753773617904001
ENSMUSG00000104597.1	21.8999461135052	-1.62692786631326	0.953768546470307	-1.70578896980213	0.0880473775240172	0.769090701328546
ENSMUSG00000015599.9	446.081069725959	0.313687375982268	0.490147523252409	0.639985639223009	0.522181935721993	0.887359821512417
ENSMUSG00000027665.13	805.050474877261	-0.876323212130203	0.581108592395515	-1.50801971197452	0.131549482064779	0.807483890983587
ENSMUSG00000023026.16	4581.02487932858	-0.285008669590698	0.437882845777459	-0.650878819161473	0.515124715192659	0.886244949447614
ENSMUSG00000047789.5	313.813743414377	-0.483709634064769	0.459852838977108	-1.05187919496317	0.292854978367136	0.839689233901408
ENSMUSG00000069072.9	0.539654662954109	0.393081480992551	4.96888791415875	0.0791085425518399	0.936946288836663	NA
ENSMUSG00000024913.16	2353.85709885485	0.216317776705088	0.476264432419113	0.454196790649125	0.649687192769817	0.922633336898336
ENSMUSG00000030257.16	1185.92205581632	-0.326762065865893	0.412957237501753	-0.79127337213579	0.428784483496966	0.86510486140734
ENSMUSG00000023830.14	1681.84468529578	-0.361886814513205	0.411186762318992	-0.880103271010605	0.378803367303328	0.858285420121816
ENSMUSG00000053825.15	4.50512936665527	-1.0995581364694	1.944277436995	-0.565535615209749	0.571709506764483	NA
ENSMUSG00000040270.16	163.341514747443	-0.438203953608033	0.52433976728967	-0.835725193748176	0.403309518622164	0.860119279510533
ENSMUSG00000030302.16	5.45309956183531	1.96419169297854	1.69763069852602	1.15701942400309	0.247264424561634	0.833143835152256
ENSMUSG00000033014.12	414.598280751798	-0.771758337840301	0.492375204733494	-1.56741917631297	0.11701674453427	0.800742247513048
ENSMUSG00000021198.16	1092.79326487734	-0.22312501031029	0.476446183639131	-0.468311045344187	0.639562170804716	0.92040096213773
ENSMUSG00000109446.1	0	NA	NA	NA	NA	NA
ENSMUSG00000060012.9	1038.49405413255	-0.0300055241580479	0.413416703444978	-0.0725793706640626	0.942140843242002	0.990744912134835
ENSMUSG00000039218.17	3005.24276567779	-0.881612366171842	0.401525393430042	-2.19565781043297	0.0281164450538428	0.579855156838457
ENSMUSG00000029478.16	1852.96209956501	-0.140671431912578	0.451030374305973	-0.311889043235808	0.755124849698683	0.947584344774287
ENSMUSG00000047412.16	211.414947801338	-0.629033994498366	0.53009089056597	-1.18665309231546	0.23536448464394	0.831997470641045
ENSMUSG00000038384.16	78.4148057318328	-0.26594084534072	0.581668053392589	-0.457203801703765	0.647524566066639	0.922521274599819
ENSMUSG00000002107.18	616.065493366664	-0.557985825996118	0.520942845350544	-1.07110757154299	0.284121064147714	0.839689233901408
ENSMUSG00000057503.6	0	NA	NA	NA	NA	NA
ENSMUSG00000021027.17	383.482277550702	-1.19695737718762	0.515956746969048	-2.31987930038529	0.0203474076420868	0.517136426979009
ENSMUSG00000073557.11	836.184274036978	-0.591723916276328	0.434499444624321	-1.3618519507843	0.173244612587186	0.820335994164243
ENSMUSG00000001930.17	24.9835214580012	1.37523405988519	0.876065215855056	1.56978502855286	0.116465131761645	0.800742247513048
ENSMUSG00000030729.17	67.9344306660968	-0.814094942569156	0.601559531573719	-1.35330736168277	0.175957458345821	0.820335994164243
ENSMUSG00000038172.14	145.241155359213	-0.563147425345755	0.529413484752648	-1.06371945854169	0.287455806816984	0.839689233901408
ENSMUSG00000036242.15	2002.31385797742	-0.0866735774090408	0.440225904728316	-0.196884318887438	0.843918065213865	0.967927216149852
ENSMUSG00000028358.15	74.1725006744485	0.834987481161158	0.586877879959794	1.42276188909754	0.154805192767829	0.815951612175072
ENSMUSG00000019790.17	266.123158013265	-0.210467971302355	0.464534845622054	-0.453072516057475	0.650496525165856	0.922953584859089
ENSMUSG00000004356.8	1613.55685739435	-0.562848465380494	0.494672853938642	-1.13781959308871	0.255195821808628	0.83506523083802
ENSMUSG00000027782.10	443.668422994191	-0.860962401121653	0.531951943841068	-1.61849657866629	0.105555623558587	0.791186343380353
ENSMUSG00000032946.16	90.1405330687445	0.0359025973900225	0.565365170724049	0.0635033766654619	0.949365670482969	0.992296536879148
ENSMUSG00000079022.10	323.261372917522	0.65804970042466	0.501523152985723	1.31210233566902	0.189485608030004	0.825325654482975
ENSMUSG00000059493.13	38.1317468183306	0.385029261545191	0.802652418676003	0.479696133203345	0.631443477848465	0.917818994545377
ENSMUSG00000063894.15	206.364240835135	-0.874197709276137	0.621494251854015	-1.4066062665395	0.15954417385382	0.815951612175072
ENSMUSG00000009575.14	7018.86554673297	-1.0128854038009	0.581707016785179	-1.74122947561926	0.0816433625121629	0.758380504605115
ENSMUSG00000056724.15	350.769103981857	0.408455949437614	0.473445451993949	0.862730749059628	0.388285521992897	0.858285420121816
ENSMUSG00000026502.13	1701.92531475095	-0.828535938260358	1.26332366346254	-0.655838216462672	0.51192822432222	0.885479644985471
ENSMUSG00000026924.17	2902.78615371049	0.0198825476511203	0.403014626049848	0.0493345560333611	0.960652681303433	0.993731584781105
ENSMUSG00000032289.15	4.81050608367127	1.10145290448248	1.7384928118457	0.633567707026126	0.526362981240943	NA
ENSMUSG00000062151.13	3.98684062067198	-2.16278324330799	2.09212139925163	-1.03377521212757	0.301241262366014	NA
ENSMUSG00000061080.11	1381.96854466496	-0.226446655825106	0.413128836345646	-0.548125998243435	0.583605390233038	0.902936641492625
ENSMUSG00000042010.16	22.109705025757	-0.360525617782242	0.881960149948138	-0.408777673008743	0.682702826291573	0.930622993428448
ENSMUSG00000029108.14	895.076238995992	-0.671041186146419	0.492106533884072	-1.36360958439235	0.172690473991793	0.820335994164243
ENSMUSG00000042589.18	333.896990692613	-1.02193592457993	0.458086050938348	-2.23088199801454	0.0256889464864347	0.562988701898361
ENSMUSG00000021149.8	1175.43921529797	-0.461552351912164	0.540130694965423	-0.854519760151218	0.392817065507624	0.858285420121816
ENSMUSG00000043719.14	1.40783734957693	4.1184667354955	3.85442335318578	1.06850399089957	0.285293231123182	NA
ENSMUSG00000021690.10	391.09012242903	-1.1456451479914	0.540070511136911	-2.12128809917743	0.0338975652543458	0.617360758054174
ENSMUSG00000074582.10	1457.03174125061	-0.511208898885501	0.415387520575309	-1.23067948256481	0.218442764765527	0.829231175924863
ENSMUSG00000004347.16	291.365466368771	-0.438669044831999	0.533323766582223	-0.822519213128616	0.410781456345589	0.861011377720667
ENSMUSG00000005417.17	14713.7946117345	0.19806803427795	0.415299255454413	0.476928459843318	0.633413065288915	0.918386422668892
ENSMUSG00000028403.15	385.177899443765	-0.379071435150906	0.465652292014577	-0.814065433911876	0.415607466571445	0.861132175618031
ENSMUSG00000091455.4	0	NA	NA	NA	NA	NA
ENSMUSG00000030172.15	664.550394999053	-0.747133813358779	0.461335020385018	-1.61950378866803	0.105338911981535	0.791186343380353
ENSMUSG00000048191.15	0.469279116525642	2.54180416126131	4.90736535554811	0.517956984471846	0.604488281980679	NA
ENSMUSG00000110670.1	0	NA	NA	NA	NA	NA
ENSMUSG00000021366.8	270.171985198481	-0.957869538521284	0.540497994330678	-1.77219813684499	0.0763616728023817	0.753773617904001
ENSMUSG00000038520.15	1197.56754268556	0.822675409904117	0.471808240231969	1.74366477681619	0.0812175607549172	0.758380504605115
ENSMUSG00000011751.16	47.545062612711	0.757193836290996	0.728663905502837	1.03915375878056	0.298733232274552	0.840913858011647
ENSMUSG00000027312.14	1730.68165969884	-0.956429944673269	0.504799233695988	-1.89467392347365	0.0581356144901727	0.720460955956678
ENSMUSG00000075054.5	239.313844155799	-0.639877847176999	0.634966930022085	-1.00773413058652	0.313582115264358	0.843699396612436
ENSMUSG00000055254.15	14494.5610784319	-0.895493763535375	0.399199036404837	-2.24322626527393	0.0248822273910505	0.555249496129978
ENSMUSG00000022641.15	312.714669168995	-0.698432565105729	0.484323400424249	-1.44207891771062	0.149280111740364	0.815951612175072
ENSMUSG00000018199.9	379.530845290748	-0.789464425860084	0.496164608198975	-1.59113409706056	0.111579400418772	0.796471368504666
ENSMUSG00000050272.10	894.498733379552	-1.25100797200992	0.440521749199377	-2.83983248110577	0.00451372303405686	0.208628724971454
ENSMUSG00000036913.15	31.7762726911857	-0.693532371717887	0.811524122696979	-0.854604752121275	0.392769995919524	0.858285420121816
ENSMUSG00000022961.18	3460.61685797427	-0.775784485880269	0.494879817973462	-1.56762199165267	0.116969376663469	0.800742247513048
ENSMUSG00000038914.15	2376.4600820523	-0.40249791573244	0.475243968662289	-0.846929034923655	0.397034677633951	0.858285420121816
ENSMUSG00000046881.7	0	NA	NA	NA	NA	NA
ENSMUSG00000102657.1	0	NA	NA	NA	NA	NA
ENSMUSG00000042207.17	3454.86721118586	-0.409147725206024	0.409262891280697	-0.999718601228876	0.317446707552486	0.843699396612436
ENSMUSG00000091805.2	0	NA	NA	NA	NA	NA
ENSMUSG00000117863.1	0	NA	NA	NA	NA	NA
ENSMUSG00000044043.4	139.335979941713	-0.516906654557422	0.515309792465326	-1.00309883901964	0.315813174810959	0.843699396612436
ENSMUSG00000002265.16	3206.68858743441	-0.770341990127076	0.469654525901994	-1.6402311649134	0.10095711174313	0.790256855363414
ENSMUSG00000040596.15	2146.0394856348	-0.833569620119456	0.55999199436159	-1.48853845860735	0.136608947641398	0.809895303977135
ENSMUSG00000034636.9	1176.22649384125	-0.790390838648864	0.513559144883731	-1.53904539822343	0.123793213535365	0.80257775634329
ENSMUSG00000012422.14	1207.35585161468	-0.293794352287693	0.46387279014182	-0.633351122401188	0.526504375843251	0.888394157441629
ENSMUSG00000038174.14	72.5242496377613	-0.0307435286986304	0.594871731852042	-0.0516809373390716	0.958782926738162	0.993426454282983
ENSMUSG00000021196.14	99.4641539694327	1.22179987718587	0.590942611065569	2.06754404625309	0.0386829182784325	0.651442610430535
ENSMUSG00000021952.16	466.345298079049	-1.00480649191914	0.520263214096874	-1.93134256794108	0.0534407024598925	0.706581627778029
ENSMUSG00000092080.2	0.229612841788049	-1.19704868042682	4.99171724895189	-0.239806988402271	0.810479889073532	NA
ENSMUSG00000031563.8	619.647203188315	-0.854079404157697	0.513321151223291	-1.66383053206038	0.0961463006023528	0.785527800207887
ENSMUSG00000021756.12	4115.43787292214	-0.728687715410379	0.496903596737214	-1.46645691477203	0.14252385072651	0.815951612175072
ENSMUSG00000051910.13	1948.50174258184	-1.23118915594635	0.554932214631392	-2.21862981366859	0.0265119195285245	0.570089431467821
ENSMUSG00000044167.6	194.184201483479	-0.444168979886376	0.548724037305716	-0.809457850739117	0.418251837824924	0.861613354527865
ENSMUSG00000038766.16	633.974836960067	-0.80745723149363	0.534843930180164	-1.50970626369759	0.131118392289575	0.807025597785238
ENSMUSG00000031284.16	148.59494153604	0.590803018844926	0.563255134501602	1.04890835902934	0.294220297931592	0.839689233901408
ENSMUSG00000053646.13	4882.00834707035	-0.518723705419054	0.455729248505705	-1.13822781206144	0.255025368160051	0.83506523083802
ENSMUSG00000053641.9	179.452489714547	-1.02125891725585	0.590200986434432	-1.73035786237084	0.0835663574475357	0.760977807617357
ENSMUSG00000027947.11	25.0712135845663	0.522118836617613	0.917174094967417	0.569269061874411	0.569173559117459	0.900093373625299
ENSMUSG00000032280.16	3202.62808985659	0.312546294917948	0.447067364653036	0.699103355845514	0.484487441466105	0.876506468050893
ENSMUSG00000039512.12	1748.73545637584	0.0849944480832447	0.440374521699358	0.193004917167461	0.846955117152671	0.968021422620809
ENSMUSG00000024077.15	397.232907238242	-0.870209815475815	0.546585528019556	-1.59208352740119	0.111365937835643	0.795908858476753
ENSMUSG00000034206.15	135.655917143472	-0.944592346220385	0.531891764726492	-1.77591083160708	0.075747615366831	0.753773617904001
ENSMUSG00000024472.9	750.431085008318	-0.578512809271525	0.510060787880245	-1.13420365379538	0.256709131733879	0.83506523083802
ENSMUSG00000041936.18	8577.95734553809	-0.389815885956963	0.472035166381112	-0.825819586590362	0.408906441580234	0.861011377720667
ENSMUSG00000037876.17	1050.44441919392	-0.811216831925702	0.442448820112554	-1.83347043782225	0.0667326409422192	0.743306148851448
ENSMUSG00000049176.14	4.94120374357866	0.0140406887541205	1.66781541721141	0.00841861072228038	0.99328299982371	NA
ENSMUSG00000034158.9	2478.15892305426	-0.558167387173531	0.485909722088985	-1.14870594639247	0.25067725304912	0.834034778362132
ENSMUSG00000039410.16	4.63911794743036	0.327691782168343	1.97828015297136	0.165644780733483	0.868436504139956	NA
ENSMUSG00000020883.18	1356.14478737717	-0.778428423687185	0.42786634193397	-1.81932614790091	0.0688616864456487	0.746052563377378
ENSMUSG00000052516.19	1249.57601752277	-1.34929420110412	0.491998543296502	-2.74247600828967	0.00609779042555539	0.254887639788215
ENSMUSG00000025078.9	1672.16618561062	-0.49770562732132	0.46422550386422	-1.07212038799767	0.283665962547657	0.839689233901408
ENSMUSG00000026674.9	129.552859970112	1.60543626335539	0.539041212017788	2.97831822050446	0.00289834895182254	0.160231949472048
ENSMUSG00000033618.7	70.3765065600616	-0.579337503087176	0.631695628736327	-0.917114947029331	0.359082409382303	0.853913912365225
ENSMUSG00000047497.10	996.933209391087	-0.244633598295768	0.427793722027984	-0.571849435134453	0.567423982903571	0.89971785582231
ENSMUSG00000054611.17	2786.49767081518	-0.411744472476192	0.437945994195191	-0.940171797284848	0.34712944564865	0.848873089458508
ENSMUSG00000053477.17	3749.49275543727	-1.10921477169754	0.476584081173205	-2.32742723795346	0.0199425374639027	0.512406607280906
ENSMUSG00000020745.15	2664.49099746207	-0.631651219416945	0.449727428398438	-1.40452011492021	0.160164026138938	0.815951612175072
ENSMUSG00000094520.4	0	NA	NA	NA	NA	NA
ENSMUSG00000034724.18	195.49260709753	-0.393102384052013	0.477522509096281	-0.823212260288977	0.410387298016163	0.861011377720667
ENSMUSG00000028991.15	4107.80568102129	-0.164656983362829	0.412101640774539	-0.399554301830389	0.689484820687414	0.931892023418053
ENSMUSG00000051344.13	268.755525787131	-0.0998861008171711	0.471769472950751	-0.211726503184742	0.832320410265982	0.965576665110637
ENSMUSG00000062866.16	126.022395947609	-0.812445038152287	0.564872855768089	-1.43827948157919	0.15035477127466	0.815951612175072
ENSMUSG00000041638.18	6915.3601928516	0.174427595136864	0.474251847986167	0.367795288257794	0.71302588257822	0.9381095419377
ENSMUSG00000079465.8	0	NA	NA	NA	NA	NA
ENSMUSG00000035954.10	224.759660283272	-0.137073814212713	0.505130698987878	-0.271363064029499	0.786111807194672	0.954672896044298
ENSMUSG00000041245.13	85.3185733681829	-0.535405165779139	0.649854255490397	-0.823884988450383	0.410004910780782	0.861011377720667
ENSMUSG00000062078.15	6653.24103859959	-0.931978920071215	0.525186458937545	-1.77456768774392	0.0759692964764555	0.753773617904001
ENSMUSG00000022419.16	26.9501249281629	-0.665180561541577	0.856063193888227	-0.777022731838682	0.43714535897412	0.867930343882203
ENSMUSG00000036792.12	194.644513545332	-0.534954373930036	0.479558384185714	-1.11551458919519	0.264629970133426	0.837881233887716
ENSMUSG00000031302.16	654.205870334624	-1.64391807400313	0.4378255418925	-3.75473314530098	0.000173526256586354	0.0193109934115385
ENSMUSG00000056492.6	0.31004182116606	1.86993753835657	4.97468760336826	0.375890445279512	0.7069983440692	NA
ENSMUSG00000090061.9	1.97854975012669	-4.3184667111791	3.05395502840382	-1.4140570738647	0.157345145473681	NA
ENSMUSG00000014592.20	413.26262760458	-0.426108127696966	0.441285953012966	-0.965605464637225	0.334241639836976	0.845232338610262
ENSMUSG00000110266.1	0	NA	NA	NA	NA	NA
ENSMUSG00000063160.12	597.332656459457	0.263478032763016	0.471847913548833	0.558396095855042	0.576573938196007	0.90161176043702
ENSMUSG00000036202.16	281.108814787796	-0.909617654953694	0.502008675311979	-1.81195604715078	0.0699929881539015	0.750623563387751
ENSMUSG00000053754.14	1517.12824651081	-0.996784871515107	0.464624549690691	-2.14535558264987	0.0319244275756791	0.608008926371472
ENSMUSG00000025938.16	36.5297729885973	-0.862154580111149	0.818641727172553	-1.05315249821052	0.292271105283951	0.839689233901408
ENSMUSG00000087088.2	43.3296199082735	-0.295190222508903	0.754221698026929	-0.39138389054721	0.695513498063887	0.933764396033606
ENSMUSG00000033237.19	953.477431606339	-0.966028072483575	0.54598706739915	-1.76932409239164	0.0768398050934607	0.753773617904001
ENSMUSG00000026491.13	845.931832040541	-0.93604669770865	0.576430847147666	-1.62386642272956	0.104404320098445	0.791186343380353
ENSMUSG00000050332.7	398.392806547975	-1.14399171702149	0.619475597958535	-1.84670989590467	0.0647891967011631	0.742659279496764
ENSMUSG00000046699.14	0	NA	NA	NA	NA	NA
ENSMUSG00000047496.6	17.0979034433591	0.341463068998654	0.975702701887631	0.349966304631572	0.726363985521349	0.941692046798846
ENSMUSG00000094002.3	29.9554118390387	1.61740797469035	0.800755034128326	2.01985364531739	0.0433985707340912	0.67299104301114
ENSMUSG00000035569.17	3365.54531225301	-0.2942372154961	0.462392302434296	-0.636336751167932	0.524556955919651	0.88795260679889
ENSMUSG00000042671.12	362.345064804586	1.76961896781068	0.485412695469212	3.64559679696906	0.0002667719743213	0.027708715732839
ENSMUSG00000069299.2	0	NA	NA	NA	NA	NA
ENSMUSG00000046130.7	0	NA	NA	NA	NA	NA
ENSMUSG00000006307.16	766.833888634657	0.144644772708128	0.450234152490399	0.321265661229936	0.748009076593263	0.946043406253881
ENSMUSG00000075415.13	4201.21016137099	-0.176424155168175	0.399060057382543	-0.44209925775421	0.658417381490924	0.925445508405761
ENSMUSG00000056211.13	303.911900188685	-1.02718646120808	0.506290867143463	-2.02884651465974	0.042473925891093	0.67299104301114
ENSMUSG00000045559.6	0	NA	NA	NA	NA	NA
ENSMUSG00000031328.15	19208.5145171534	0.439750392058303	0.442329244552199	0.99416983496873	0.320140191114011	0.843699396612436
ENSMUSG00000053469.14	1.61776250389591	1.42170828682016	3.06238911858778	0.464248085976671	0.642470013338095	NA
ENSMUSG00000009470.17	3818.19106978421	-0.696665630232612	0.474312395755246	-1.46879068830431	0.141889570486278	0.81409556712214
ENSMUSG00000115701.1	0	NA	NA	NA	NA	NA
ENSMUSG00000032511.17	81.4851453984734	0.116394427012389	0.604864620611555	0.192430542382702	0.84740497007533	0.968021422620809
ENSMUSG00000040327.16	239.428964451369	0.510575571180741	0.525285454735828	0.971996400390557	0.331052339325548	0.844910646516937
ENSMUSG00000021700.10	7.6092576776136	4.01211661548148	1.6750782020252	2.39518167607384	0.0166121318335187	0.467340144168634
ENSMUSG00000040054.16	1046.33698887946	-0.472521914697058	0.41260897362343	-1.14520513344023	0.25212419237644	0.834910648407917
ENSMUSG00000034480.18	85.0105823924371	-1.13247974487577	0.579006918928861	-1.95590019368129	0.0504769125259474	0.696363429184864
ENSMUSG00000036155.13	2708.5689636987	-0.45175199533145	0.479654384395995	-0.941828137149874	0.346280637055182	0.848873089458508
ENSMUSG00000042121.16	663.736699522367	-0.370496041319132	0.423408460248196	-0.875032211453576	0.381556379378115	0.858285420121816
ENSMUSG00000024241.7	183.298697974921	-0.640506374641953	0.510760098950662	-1.25402586450635	0.209832604527713	0.829231175924863
ENSMUSG00000043557.16	378.219803064207	-0.410626281095718	0.548232456514721	-0.749000312214626	0.453857017247171	0.871927817221244
ENSMUSG00000054051.7	694.41743979637	-0.990007934253602	0.501323072872938	-1.97479028559398	0.0482919519199499	0.688787329962153
ENSMUSG00000042942.18	3.11697970454741	-3.45740947461837	2.47552476145685	-1.3966369993341	0.162522758158045	NA
ENSMUSG00000050965.14	525.357244039241	-0.981688065069143	0.485515374042796	-2.02195052423327	0.0431814633949022	0.67299104301114
ENSMUSG00000026532.7	10.0119517403915	3.02065127641034	1.4651828935303	2.06162062753286	0.039243868601984	0.655947878158733
ENSMUSG00000026837.15	2307.44716074083	0.345470621170339	0.471639106457172	0.732489347131165	0.463869942468051	0.874288355668279
ENSMUSG00000070847.13	0	NA	NA	NA	NA	NA
ENSMUSG00000009628.14	4.59309519262102	-1.13912837225246	2.00992313003436	-0.56675220819663	0.570882544769722	NA
ENSMUSG00000025321.14	1595.38718029979	-1.0513984314843	0.472553391254541	-2.22493045429857	0.0260859072064324	0.5651836633424
ENSMUSG00000096373.3	0	NA	NA	NA	NA	NA
ENSMUSG00000058793.14	6784.34818585865	-0.212102931473404	0.413201207651329	-0.513316339705333	0.607730056009953	0.909687130831471
ENSMUSG00000028465.16	6478.81423552333	0.455119321200642	0.436295692498352	1.04314420019712	0.296881512232061	0.839974355971123
ENSMUSG00000052062.14	369.411442810424	-1.16868386676212	0.516876491553742	-2.26105053307616	0.0237561280446737	0.550301325929527
ENSMUSG00000036550.16	2706.46342310931	-1.09447353673365	0.551041158388	-1.98619199323585	0.0470120095709117	0.685502589946318
ENSMUSG00000004317.14	911.298880025209	-0.375449801247961	0.467982643705618	-0.802272918232701	0.422395104423213	0.862860117814821
ENSMUSG00000064329.13	3.96715293320292	-2.82142763678169	2.16125083631851	-1.30546051821904	0.19173608275839	NA
ENSMUSG00000030306.14	151.87420571111	-0.115768619126145	0.64910282872024	-0.17835174028496	0.858446747246665	0.971101450208769
ENSMUSG00000006906.10	130.414413290581	-0.632062270728342	0.514762576869577	-1.22787144817733	0.219495229166545	0.829231175924863
ENSMUSG00000027652.15	1008.93075677616	-1.0686144434435	0.597243558795032	-1.789243982136	0.0735755312563975	0.753773617904001
ENSMUSG00000020866.17	734.556998254036	-0.536532486198923	0.483975375572762	-1.1085945964998	0.267605110217209	0.839290322368936
ENSMUSG00000042810.14	1256.27594127133	0.142348318186977	0.443587865121053	0.320902191830994	0.748284512871654	0.946043406253881
ENSMUSG00000013415.9	171.625720739105	-0.916683024346742	0.497868435121573	-1.84121538880628	0.0655900010960864	0.743306148851448
ENSMUSG00000038170.15	1381.32443280764	-0.791284597779997	0.491840734059681	-1.60882282207228	0.107655089083148	0.791186343380353
ENSMUSG00000030411.16	371.959789111022	-0.00945555449848285	0.477338676590038	-0.0198089008123759	0.984195817456007	0.998115149982901
ENSMUSG00000026600.12	2589.96772180096	-0.755420355813323	0.479068420842878	-1.57685274784806	0.114829411237472	0.799328371156699
ENSMUSG00000064225.6	93.4188728829348	-0.356304378202473	0.550595902849748	-0.647125008301605	0.517551041046382	0.886844462293945
ENSMUSG00000031012.17	2846.73063456437	-0.876708041786347	0.553106306171141	-1.58506245906927	0.112952143976016	0.79755514569615
ENSMUSG00000031543.18	47.340767029685	-0.0244843003648225	0.677426866567274	-0.0361430902333293	0.971168263719646	0.995963656720738
ENSMUSG00000025958.14	626.063155206183	-0.144318282142257	0.42823745567738	-0.337005276462743	0.736112922500801	0.944201811336036
ENSMUSG00000033964.12	217.367594764234	-1.30112755695461	0.569535028567734	-2.28454351653609	0.0223396081571742	0.538612013022118
ENSMUSG00000049372.11	0	NA	NA	NA	NA	NA
ENSMUSG00000038518.15	822.371295116055	-1.22242714708467	0.45396733888422	-2.69276452814691	0.0070862296758597	0.283747206039447
ENSMUSG00000050321.3	133.824087688154	-0.538523208779141	0.582119517492998	-0.925107632704686	0.354909923167746	0.852352213475867
ENSMUSG00000044791.16	521.953116809289	-0.76563260417118	0.44032687702744	-1.73878235491736	0.0820730534707784	0.75865648094195
ENSMUSG00000000276.11	234.665430919754	-0.986136558674142	0.555311376639975	-1.77582632043478	0.0757615480556187	0.753773617904001
ENSMUSG00000022788.16	204.70060219303	0.18440912736816	0.528463243525441	0.348953554722075	0.727124178318318	0.941703097925123
ENSMUSG00000045441.5	0.899182858113156	0.147090685012917	4.19619500674942	0.0350533482777439	0.972037201210611	NA
ENSMUSG00000026867.18	2280.0917398611	-0.704177648801087	0.491349237698166	-1.43315099479947	0.15181469082073	0.815951612175072
ENSMUSG00000033799.10	285.315090318774	-0.71133521621871	0.531527895682189	-1.33828388311727	0.180803913599349	0.821273097410324
ENSMUSG00000020890.11	1.45852520853633	1.20044246873848	2.93425032682307	0.409113857043754	0.682456107533322	NA
ENSMUSG00000062519.13	340.455142422754	-0.874328423892087	0.506051075528155	-1.72774738790856	0.0840335236050906	0.761439452125547
ENSMUSG00000029313.18	772.879072138831	-0.683484820286843	0.483189760152361	-1.41452670700497	0.157207311521146	0.815951612175072
ENSMUSG00000094483.2	1585.01100681606	-0.914229066219272	0.553657780524899	-1.65125299124765	0.0986869267560445	0.789193042121322
ENSMUSG00000026193.15	621.591590061962	-0.441874372572294	0.432050613821326	-1.02273751832935	0.306431967157269	0.84249089680945
ENSMUSG00000000794.9	143.555928885957	-0.776540256347949	0.562547512939614	-1.38039941246937	0.167463700988328	0.81932292163843
ENSMUSG00000031816.15	1200.06717210686	0.191477855183596	0.43975125494641	0.435423101195993	0.663255345233526	0.926741125801332
ENSMUSG00000063632.6	2038.61983607272	-0.573870864502218	0.4991569888498	-1.14968011531719	0.250275647224603	0.833896735135509
ENSMUSG00000095864.2	0	NA	NA	NA	NA	NA
ENSMUSG00000094970.3	0	NA	NA	NA	NA	NA
ENSMUSG00000022812.14	1510.92804078591	-1.16771929834714	0.51706050981684	-2.25838035621939	0.0239219563436514	0.550301325929527
ENSMUSG00000028906.16	1464.03205032307	-0.447817197184139	0.4348412092271	-1.02984075032839	0.303084767887377	0.841578813896102
ENSMUSG00000085438.1	699.715806408659	-0.673366020198084	0.501906626849641	-1.34161611777206	0.17972049743953	0.821273097410324
ENSMUSG00000067889.5	97.5226133314101	0.953557067777713	0.668300033905363	1.42683977165972	0.153626084400696	0.815951612175072
ENSMUSG00000042595.7	129.142314720144	-0.517433155241204	0.552904728637288	-0.935845053299673	0.349352971024238	0.849644275251215
ENSMUSG00000040785.19	5233.79166267538	-0.41617313855335	0.446448445125218	-0.932186332145527	0.351240237728234	0.850744893848418
ENSMUSG00000009569.14	1824.84537975482	-0.38975089453797	0.427303682347067	-0.912116863578548	0.361707201971249	0.854822373161201
ENSMUSG00000021311.9	1044.03578948462	-0.362001089803006	0.412501371768893	-0.877575481144872	0.380174140026537	0.858285420121816
ENSMUSG00000070448.12	0	NA	NA	NA	NA	NA
ENSMUSG00000091930.2	0	NA	NA	NA	NA	NA
ENSMUSG00000013663.7	967.350922204593	-0.614341721380089	0.529134271668223	-1.16103181040084	0.245628963330742	0.833143835152256
ENSMUSG00000061143.15	273.484632632787	0.586961885513139	0.475599396605253	1.23415187172812	0.217146317586309	0.829231175924863
ENSMUSG00000040717.6	460.93158929725	0.18899040636689	0.479794234933058	0.393898868737467	0.693655705610976	0.933754829345607
ENSMUSG00000078161.8	118.920561594429	0.406866830879391	0.607453776225458	0.66979060268181	0.502991284957839	0.883042884819447
ENSMUSG00000072720.9	36.5208031739937	1.9889456421064	0.753202868012682	2.64065064881419	0.00827469952943186	0.314438582118411
ENSMUSG00000036273.15	122.667641002405	-0.650228759091832	0.636186389016813	-1.02207272949791	0.30674647907606	0.84249089680945
ENSMUSG00000021763.17	5.93547655206412	0.289145435816986	1.53084963483053	0.188879057249143	0.850187608018089	0.968970993250248
ENSMUSG00000047003.15	3469.23811066063	0.0630932397706157	0.401874498605842	0.156997371043684	0.875246920012478	0.974491073741865
ENSMUSG00000031386.14	4162.57300430717	-0.28299390202407	0.415714266540562	-0.68074137647248	0.49603515019203	0.880755325734667
ENSMUSG00000029729.12	1236.00071780422	-0.770590050917369	0.501445737899259	-1.53673666495931	0.124357808626068	0.803660266410678
ENSMUSG00000097286.2	0	NA	NA	NA	NA	NA
ENSMUSG00000042359.18	414.077361178702	-0.414068803555365	0.43535417489858	-0.951107919550391	0.34154959489807	0.847661806449652
ENSMUSG00000027508.15	485.373599665837	-0.791731722814581	0.471364947516864	-1.67965761345938	0.0930239511682868	0.781245657902783
ENSMUSG00000090115.7	182.030890105302	-0.675379549522762	0.617273799312244	-1.09413286336672	0.273896711015343	0.839290322368936
ENSMUSG00000040612.13	1508.32716385801	-1.24053368980952	0.581582729823118	-2.13303048078269	0.0329222258568326	0.611528545630023
ENSMUSG00000064006.6	0	NA	NA	NA	NA	NA
ENSMUSG00000027630.13	1251.21576793301	-0.932482425461353	0.588794552555135	-1.58371442367248	0.113258720975306	0.79755514569615
ENSMUSG00000049100.15	1991.33579064884	-1.05656808244592	0.417226414609911	-2.53236143601733	0.0113297139131168	0.377026479695137
ENSMUSG00000027339.15	3325.82282565389	-0.676960249772112	0.437844008486808	-1.54612199013912	0.122075108906735	0.801999230979138
ENSMUSG00000018800.14	37.7525162357914	-1.57912526137311	0.828821464573636	-1.90526588519935	0.0567455176494231	0.717956416527001
ENSMUSG00000024112.16	1771.45045576682	0.915839023171237	0.472330741359415	1.93897822643379	0.0525039895012389	0.701835890634069
ENSMUSG00000079698.7	0	NA	NA	NA	NA	NA
ENSMUSG00000035459.18	3.0368547713888	3.64944873642596	2.53197820812192	1.4413428696659	0.149487841689766	NA
ENSMUSG00000079227.10	0.229612841788049	-1.19704868042682	4.99171724895189	-0.239806988402271	0.810479889073532	NA
ENSMUSG00000069289.2	0	NA	NA	NA	NA	NA
ENSMUSG00000017412.15	18.5859728862748	-0.283367697981135	0.972780177183255	-0.291296743732632	0.770824377644928	0.950592803056687
ENSMUSG00000024483.19	689.165960755485	-0.599649945250727	0.425991959885817	-1.40765554685928	0.159233090841739	0.815951612175072
ENSMUSG00000005442.13	1639.12994062583	-0.0762957374107602	0.490279816341336	-0.155616721039241	0.876335144034178	0.974792736967466
ENSMUSG00000037339.17	3687.19595924318	0.357165418002644	0.445805787833555	0.801168194200284	0.423034281506993	0.862870836642021
ENSMUSG00000014444.17	2439.27379774481	0.346769882751798	0.499096317645068	0.694795514396888	0.487183459674363	0.877382986266883
ENSMUSG00000037426.17	1399.45437938342	-0.474868058452205	0.40843338479165	-1.16265730504485	0.244968570575006	0.833143835152256
ENSMUSG00000042700.16	1319.96093550839	-0.0923526723632371	0.409123335951212	-0.22573308400636	0.821409024817195	0.962828647385118
ENSMUSG00000019971.10	52.5543984214501	-0.824368104480566	0.709357350942605	-1.16213373046058	0.245181148042325	0.833143835152256
ENSMUSG00000016346.17	97.1565176972734	0.954985484524329	0.584139399438906	1.63485888033171	0.102078634169136	0.791186343380353
ENSMUSG00000039361.11	2165.3883173491	-0.737383305817106	0.601123278557059	-1.22667567888425	0.2199445123984	0.829231175924863
ENSMUSG00000014602.15	6082.27838793303	-0.0718453185568437	0.44027755433716	-0.163181878905926	0.870375233499896	0.973858745321563
ENSMUSG00000017667.9	1863.72272456066	-0.631894246758211	0.516719303094839	-1.22289653777891	0.22136877641736	0.829231175924863
ENSMUSG00000026234.12	3578.96638787263	-0.75614266056169	0.531506589780642	-1.42264023645268	0.154840473581762	0.815951612175072
ENSMUSG00000068270.15	211.925138442438	-0.196346095565107	0.577224121252902	-0.34015573559006	0.733739250559214	0.943144390810692
ENSMUSG00000046678.6	0	NA	NA	NA	NA	NA
ENSMUSG00000004319.15	1673.0105589198	-1.0431848120351	0.518942606948685	-2.01021230106523	0.0444087240356931	0.674345149063116
ENSMUSG00000019775.17	59.9643765515937	0.203737032657534	0.633833816228551	0.32143604118476	0.747879974122898	0.946043406253881
ENSMUSG00000037533.19	250.998516100857	-0.724968228367925	0.599516311362272	-1.20925521896242	0.226564809284166	0.829231175924863
ENSMUSG00000115267.1	0	NA	NA	NA	NA	NA
ENSMUSG00000007880.16	1210.86371126875	-0.327135516968275	0.419011400323791	-0.780731781320225	0.434960264269176	0.867930343882203
ENSMUSG00000052707.8	1199.04653602288	-0.823794920562991	0.508420500122952	-1.62030232920146	0.10516734882497	0.791186343380353
ENSMUSG00000030000.10	1435.38451291954	0.283390862229963	0.433426348467181	0.653838566188188	0.513215816821821	0.885479644985471
ENSMUSG00000013033.16	6457.50552343047	0.485377505168199	0.452305779964623	1.07311806894478	0.283218144869185	0.839689233901408
ENSMUSG00000049571.18	74.7373299985572	-0.82391062112789	0.617183457333176	-1.33495253532551	0.181891881730549	0.821273097410324
ENSMUSG00000057203.3	0	NA	NA	NA	NA	NA
ENSMUSG00000037685.15	1432.6753656922	-1.12632023896843	0.503685598405359	-2.2361573222151	0.0253414676876237	0.561113789703482
ENSMUSG00000021557.15	567.757166030729	-0.650699443083135	0.511502763643179	-1.27213280031671	0.203325938857336	0.828656558037319
ENSMUSG00000062901.3	837.094206348506	-1.34785618237185	0.604893452823669	-2.22825387856324	0.0258635900341231	0.56321500127675
ENSMUSG00000045417.2	0	NA	NA	NA	NA	NA
ENSMUSG00000005886.14	580.091011533795	-0.783348926599282	0.464092083744628	-1.68791701913694	0.091427159141443	0.780057733093035
ENSMUSG00000006281.8	6.4588495806275	-0.0930169635483619	1.47938810623943	-0.0628752949655712	0.949865807671714	0.992296536879148
ENSMUSG00000021318.15	284.848732538761	-0.668643243825814	0.542790731717616	-1.23186194007025	0.21800066079641	0.829231175924863
ENSMUSG00000052544.9	140.958677920443	-0.464672373725671	0.562661439516616	-0.825847198849939	0.408890775966337	0.861011377720667
ENSMUSG00000022892.11	9045.94009724199	-0.460677303981345	0.413854638342219	-1.11313795062606	0.265649186750544	0.83920659217158
ENSMUSG00000039385.5	572.210258162694	-0.431658143169537	0.435871073021656	-0.990334458712956	0.322010669122042	0.843814262337405
ENSMUSG00000103146.1	0.659516583375562	-2.73353604501918	4.7571170002654	-0.574620309920205	0.565548113187401	NA
ENSMUSG00000075254.12	1057.33459510917	-0.299521679405919	0.491790563653755	-0.609043160935468	0.542495830771529	0.891978311797672
ENSMUSG00000091896.8	1258.27114879412	-0.577255603551202	0.483909686663762	-1.1928994592586	0.232908751043883	0.830647405193672
ENSMUSG00000041702.7	800.916823410416	-0.750973399476135	0.564947870813219	-1.32927910392005	0.183755905612743	0.822062559319137
ENSMUSG00000044912.10	40.4521095924245	-0.49578284230396	0.834401415985222	-0.594177853495806	0.552393163600299	0.896826616203495
ENSMUSG00000026163.17	4.21848533225601	4.16176703060938	2.56421001688635	1.62302112666376	0.104584888703861	NA
ENSMUSG00000028760.16	1522.93339688112	-0.524699981613714	0.420791943008036	-1.24693447755413	0.212421523599332	0.829231175924863
ENSMUSG00000021733.10	576.80656868145	-0.537591854127842	0.457376889909926	-1.17538044878855	0.239842541859915	0.832237885230054
ENSMUSG00000029502.14	1046.06224545984	-0.837485174913094	0.477851055522718	-1.75260714658666	0.0796694637212967	0.755826009020748
ENSMUSG00000022272.17	8572.16511830567	-0.479784375501639	0.401553514569301	-1.19482051107496	0.232157164761085	0.830182494193876
ENSMUSG00000042282.4	0.459225683576098	-2.20617578504712	4.88917004575345	-0.451237278393155	0.651818544677659	NA
ENSMUSG00000032911.6	945.195902120391	-0.194388814146414	0.476552063963068	-0.40790677209506	0.683342120740371	0.930622993428448
ENSMUSG00000038970.7	2372.35930791375	-0.324676057969825	0.402945555520442	-0.805756642607649	0.420383182332472	0.862817602253162
ENSMUSG00000048251.15	182.688182223467	0.288684268698411	0.505656433687141	0.570909909310134	0.568060713450893	0.89971785582231
ENSMUSG00000025558.17	232.124266320086	-0.2986160958986	0.50714155047487	-0.588821987902561	0.555980694252135	0.89798489258796
ENSMUSG00000027823.9	1230.47011479418	-0.625696010462907	0.462101818668461	-1.35402196049745	0.175729371617365	0.820335994164243
ENSMUSG00000032409.15	133.640254152625	-0.984586238013504	0.551264169512161	-1.78605157466485	0.074090907855709	0.753773617904001
ENSMUSG00000038495.14	1361.19800412529	-0.736880843022469	0.45214110117264	-1.62975858888154	0.103152529177828	0.791186343380353
ENSMUSG00000026313.16	2061.47482114406	-0.054296493969137	0.403063711663386	-0.134709457581937	0.892841595285042	0.979106367718703
ENSMUSG00000061602.3	0	NA	NA	NA	NA	NA
ENSMUSG00000039704.7	260.736038599638	-0.803416141939365	0.460288511408941	-1.74546207872995	0.0809044678309408	0.758380504605115
ENSMUSG00000020003.16	1267.02413429057	-0.0527396242799224	0.409076694903273	-0.128923561124382	0.897418133168894	0.980807863042139
ENSMUSG00000025016.11	3737.86564483037	-1.06546869130217	0.6188646253323	-1.72165066104734	0.0851328200614093	0.762587911554967
ENSMUSG00000069044.6	0	NA	NA	NA	NA	NA
ENSMUSG00000024542.9	419.908570106172	-0.702115031343929	0.561800464984719	-1.249758722366	0.211387698903662	0.829231175924863
ENSMUSG00000032440.13	3344.71187245862	0.771654564823919	0.423529905709477	1.821960042069	0.0684610488051492	0.744943145665173
ENSMUSG00000024563.16	1238.06805349226	-0.336069178960575	0.475134434350073	-0.707313877219355	0.479371443559767	0.874663631084618
ENSMUSG00000097451.10	44.8933288780262	3.17010542488103	0.904618058389747	3.50435788394932	0.000457709794633647	0.0419477564728954
ENSMUSG00000044072.14	96.4294097496725	-1.34025467798571	0.581431189864968	-2.3050959448821	0.0211612005597662	0.526966581997755
ENSMUSG00000044308.17	830.220959730506	-1.07663755267392	0.485741259154534	-2.21648363688085	0.0266583973143294	0.571089516466222
ENSMUSG00000042444.10	347.056837175453	-0.883207759950482	0.575138733132553	-1.53564298328509	0.124625966018602	0.803660266410678
ENSMUSG00000053702.16	197.273966438935	-0.405407691281754	0.4798336758054	-0.84489211933964	0.398171074872493	0.858285420121816
ENSMUSG00000068748.7	12155.6314356585	-1.31202746685486	0.462066786461542	-2.83947581885776	0.00451877198298706	0.208628724971454
ENSMUSG00000037940.17	137.578151643883	0.374628262451898	0.548424657304564	0.683098867751765	0.494544370847286	0.880543463703394
ENSMUSG00000040797.16	11.5314166426576	2.22589815431778	1.24240057498817	1.79161069233968	0.0731953491720569	0.753773617904001
ENSMUSG00000030213.12	733.438827472886	-0.690297509537373	0.437002470801329	-1.57961923709854	0.114194091068118	0.798838819696269
ENSMUSG00000036523.16	104.856277684314	-0.605329282830417	0.543013249352074	-1.114759692425	0.264953413567755	0.838089996626834
ENSMUSG00000031314.18	650.886510882565	-1.19574652047234	0.586719515759574	-2.03802070385252	0.0415478623817092	0.66979375390567
ENSMUSG00000049583.15	2366.94440576641	-0.928411589153275	0.431686111347141	-2.15066356028001	0.0315027645357775	0.606326579651397
ENSMUSG00000027284.16	766.440951491669	-0.0968734837897433	0.438360364346424	-0.220990517548678	0.825099816362126	0.963820260659631
ENSMUSG00000030660.9	451.868996524352	-0.580336642432746	0.448932490122326	-1.29270359174631	0.196113595053714	0.827154552458072
ENSMUSG00000020021.4	185.399960922023	-0.319143829912755	0.490728349153113	-0.650347244995171	0.515467945856799	0.886244949447614
ENSMUSG00000026159.13	1083.47201630262	-0.372274123436936	0.494470261827171	-0.752874646214932	0.451525244992184	0.871927817221244
ENSMUSG00000052854.15	15.4351788339047	-0.480473193278394	1.09791970211837	-0.437621432925696	0.661660731700923	0.926710325093771
ENSMUSG00000028078.14	3334.03982680298	0.202677601446745	0.424579699951818	0.477360555555872	0.6331053969684	0.918341902035123
ENSMUSG00000034040.16	179.421442356224	-0.34741658885297	0.534184859616465	-0.650367719336726	0.515454723637551	0.886244949447614
ENSMUSG00000027820.12	4.56246460548589	-0.759133580913236	1.77345220604573	-0.428054152418282	0.668611695090719	NA
ENSMUSG00000100967.1	12.9613204619132	-0.932393691195641	1.11941297445992	-0.832930931183363	0.404883683856017	0.86037625148221
ENSMUSG00000034312.14	553.2309185157	-0.0666983266604444	0.439956974989155	-0.151601930307136	0.87950091084215	0.975453175719945
ENSMUSG00000052812.5	379.820872746716	-0.127813440310241	0.447724562060582	-0.285473371668509	0.775281502324948	0.951533776490375
ENSMUSG00000072640.11	530.789727099988	-0.0532098582834399	0.426610727633002	-0.124726957942826	0.90073971469864	0.981448293325963
ENSMUSG00000026944.18	2948.66195872685	-0.174081342622038	0.477901852272968	-0.364261703096741	0.715662594742992	0.938607244396674
ENSMUSG00000020790.14	2232.12509182517	-0.630339287845967	0.552241685938744	-1.14141924431957	0.253695500097273	0.83506523083802
ENSMUSG00000025194.5	1.60310153290162	1.4577972704835	3.31479431797391	0.439785136163303	0.660092734056831	NA
ENSMUSG00000026425.15	4093.79377168609	-0.51412782756355	0.465122323340186	-1.10536046490188	0.269003427497659	0.839290322368936
ENSMUSG00000036103.9	18.8000848844269	0.314663979330021	1.00941531393791	0.3117289533705	0.755246522019513	0.947584344774287
ENSMUSG00000018160.15	1911.01306213344	-0.731497693116893	0.524972832180271	-1.39340104530534	0.163498549813356	0.815951612175072
ENSMUSG00000048264.16	1892.29990307158	-0.36223812189144	0.495550027091923	-0.730981943472371	0.464790182089933	0.874341358146023
ENSMUSG00000036712.15	248.593158159753	-0.812644710309946	0.619500170383668	-1.31177479710241	0.18959613096527	0.825325654482975
ENSMUSG00000057738.13	35243.8884259561	0.351779704634106	0.395232458227099	0.890057730106707	0.373434888412588	0.855344219410791
ENSMUSG00000038146.8	6549.76363287805	0.0188921546319073	0.490342414082069	0.0385284937409988	0.969266313624757	0.995343404811618
ENSMUSG00000030022.14	700.599855097419	-0.576244000658712	0.518092662838597	-1.11224119156891	0.26603446154474	0.839290322368936
ENSMUSG00000032560.14	959.926998095052	-1.15177969655304	0.569632540284109	-2.02196962971704	0.0431794894722179	0.67299104301114
ENSMUSG00000043671.14	1685.11087592576	-0.315013827955997	0.443585276284477	-0.710153931606094	0.47760868524117	0.874663631084618
ENSMUSG00000014030.15	0	NA	NA	NA	NA	NA
ENSMUSG00000042286.13	1.97854975012669	-4.3184667111791	3.05395502840382	-1.4140570738647	0.157345145473681	NA
ENSMUSG00000049804.9	755.979726181384	-0.495551688314342	0.451692434281482	-1.09709981993085	0.272597758946703	0.839290322368936
ENSMUSG00000005610.17	9575.07344932468	-1.04710349576227	0.627594075014525	-1.66844069670039	0.0952282751405598	0.781245657902783
ENSMUSG00000070498.3	76.7888499134638	-1.8557873214315	0.598963990795878	-3.09832869746578	0.00194615444383783	0.124918332803344
ENSMUSG00000037674.15	668.408429763868	-0.529790618950377	0.425308174189763	-1.24566291245086	0.212888174877736	0.829231175924863
ENSMUSG00000033184.14	2778.79957501656	-0.616514566921493	0.510929298132918	-1.20665338467458	0.227565658315219	0.829231175924863
ENSMUSG00000026933.17	2145.09479159587	-0.0724015585585651	0.409322303965825	-0.176881537744423	0.859601440698275	0.97141432140422
ENSMUSG00000090762.2	0	NA	NA	NA	NA	NA
ENSMUSG00000038241.16	1813.87237498018	-0.00459463130743467	0.438996092865287	-0.0104662236910719	0.991649314165509	0.999004062102471
ENSMUSG00000056673.14	87.9602607398778	1.26365237608457	0.844747516990353	1.49589356662057	0.134681393070301	0.809895303977135
ENSMUSG00000024924.14	587.416010389946	-0.716807864932463	0.498074306033042	-1.43915848749867	0.150105624007615	0.815951612175072
ENSMUSG00000008763.16	1013.40475660141	-0.64246551935838	0.52552876497556	-1.22251256672555	0.221513854573812	0.829231175924863
ENSMUSG00000028518.8	68.8058160635099	-1.1553519275627	0.664878892185497	-1.73768778215382	0.082265842709982	0.758811632057951
ENSMUSG00000031488.14	35.5958706690374	1.0299071503228	0.784027422002161	1.31361113325953	0.188977100192534	0.825325654482975
ENSMUSG00000022799.4	1879.00993463345	-0.203529865022326	0.454076038017473	-0.448228596053981	0.653988226889995	0.924126806917005
ENSMUSG00000027797.15	1095.65863713472	-1.69140429053523	0.500458023281017	-3.37971260695619	0.000725616614240735	0.0595005623677403
ENSMUSG00000025241.16	434.73855991292	-0.881295357186435	0.440635104094414	-2.00005707443046	0.045494101240771	0.678086869536839
ENSMUSG00000006204.6	0.688838525364146	-2.79244286766858	4.85455073899056	-0.575221687403607	0.565141377161721	NA
ENSMUSG00000061376.2	0	NA	NA	NA	NA	NA
ENSMUSG00000091879.2	0	NA	NA	NA	NA	NA
ENSMUSG00000020841.5	3518.63613162831	-1.18185911285141	0.529751289191114	-2.23096977197735	0.0256831313839966	0.562988701898361
ENSMUSG00000021843.17	593.775830507509	-1.02560841497998	0.46692582507087	-2.19651250779353	0.0280552809063428	0.579290848401087
ENSMUSG00000004698.10	111.216458266021	-0.828339279101996	0.555112379035367	-1.49220105763345	0.135646445190275	0.809895303977135
ENSMUSG00000038024.17	473.161001270069	-0.799798387690389	0.514037939411142	-1.55591314642379	0.119728746840188	0.801214862689238
ENSMUSG00000008730.17	1839.41980156047	-0.968183600041477	0.571597957936403	-1.69381920736183	0.0902996430937879	0.776024377638492
ENSMUSG00000096630.2	0	NA	NA	NA	NA	NA
ENSMUSG00000060961.14	1935.23024613539	-1.02250395791226	0.506517868414878	-2.01869276815868	0.0435191621191918	0.67299104301114
ENSMUSG00000045095.16	3746.06707858174	-0.221548018758355	0.422129067884168	-0.524834785410105	0.599698047570924	0.905757040563189
ENSMUSG00000047730.17	0	NA	NA	NA	NA	NA
ENSMUSG00000026447.16	310.768918783998	-0.207401840370457	0.454293822045938	-0.456536783697411	0.648004026052965	0.922521274599819
ENSMUSG00000078190.7	1.77825885032722	-4.16348542180228	3.16933720608265	-1.31367700912722	0.188954921091443	NA
ENSMUSG00000063583.6	0	NA	NA	NA	NA	NA
ENSMUSG00000020156.16	2012.37753802617	0.426573609990617	0.436077135062174	0.978206779701482	0.327972063990105	0.844910646516937
ENSMUSG00000033577.18	3659.50871939397	-1.10454550781703	0.489436983194539	-2.25676756302251	0.0240226025902157	0.551602937849795
ENSMUSG00000034656.17	678.242345198582	0.531342045771302	0.450146352169418	1.18037621144895	0.237850618956842	0.832237885230054
ENSMUSG00000027253.15	2155.79821008174	0.282921601129051	0.40830201734969	0.692922368999082	0.488358270934246	0.87761635865816
ENSMUSG00000028977.16	12.3438927258768	1.20710499259471	1.17963535765573	1.02328654762736	0.306172382302011	0.84249089680945
ENSMUSG00000039270.9	419.071532405315	-1.1870895023434	0.571727032119755	-2.07632215314728	0.0378641657439749	0.648267804715527
ENSMUSG00000066392.11	18.5502004504543	0.413165951949654	0.942067415541845	0.438573657397985	0.660970488027937	0.926710325093771
ENSMUSG00000078776.9	378.682654348232	0.7753461142277	0.467443686136088	1.65869416407514	0.0971774359756351	0.789121842773781
ENSMUSG00000053007.9	117.598030468204	-0.910530051282369	0.585683478790148	-1.55464527215837	0.120030575348641	0.801999230979138
ENSMUSG00000034910.5	292.254573096471	-0.548149867155456	0.630745623046912	-0.8690506079258	0.384819450652588	0.858285420121816
ENSMUSG00000023852.14	560.479021532845	-0.791585118125335	0.505734780979452	-1.5652178728785	0.117531832150432	0.800742247513048
ENSMUSG00000034573.14	2418.11523074831	-0.299316791890247	0.500015720795328	-0.598614762380175	0.549429809474048	0.894602871962232
ENSMUSG00000010175.13	180.796548084863	-0.603182815042653	0.501250219868263	-1.20335670915253	0.228838312735075	0.829231175924863
ENSMUSG00000015882.17	89.6150797694169	-0.650982824540767	0.689323924203393	-0.944378690023077	0.344976167167749	0.848598498040106
ENSMUSG00000022604.18	337.883572559906	-0.556988127358144	0.470808764908229	-1.18304536549296	0.23679116869149	0.832237885230054
ENSMUSG00000045328.11	454.088033824445	-1.0734908889804	0.511674394568495	-2.09799610919693	0.035905489076156	0.632423712011471
ENSMUSG00000031596.15	218.107807419998	-1.56965793375259	0.523420825826413	-2.99884501399865	0.00271005126339253	0.151286184208538
ENSMUSG00000048410.17	373.077404233172	-1.1568004924503	0.510559080660904	-2.26575245895706	0.0234665436582139	0.549751036453445
ENSMUSG00000039607.15	204.320207225745	0.102864597016237	0.51357324184428	0.200291971300612	0.841252241304061	0.967852138608692
ENSMUSG00000024236.18	487.848556627718	-0.274828238844473	0.460954713596217	-0.596215269609359	0.551031426102514	0.895635108170038
ENSMUSG00000042323.17	490.072220591621	-0.729893664478474	0.490126317208934	-1.48919500718695	0.136436025181745	0.809895303977135
ENSMUSG00000025780.7	31.6921161526673	0.203035193151704	0.801910268271376	0.253189416802672	0.800121844308158	0.958729809215312
ENSMUSG00000036452.18	533.527180772128	-0.551665028341626	0.451389030481295	-1.22214983326779	0.221650970967928	0.829231175924863
ENSMUSG00000026987.16	438.221657846981	-0.560674476104164	0.513915386313647	-1.09098596974479	0.275279056250379	0.839290322368936
ENSMUSG00000057132.16	4.17654377688125	-0.544940213876501	1.83209600336507	-0.297440861655499	0.766129951381563	NA
ENSMUSG00000025159.8	1961.56747889208	0.281432879879188	0.45119339745022	0.623752212398538	0.532790327679763	0.889829817138853
ENSMUSG00000061186.15	43.53481745187	-0.630207388842428	0.691984749487527	-0.910724389965458	0.362440609760659	0.854822373161201
ENSMUSG00000035168.16	3877.64925004365	-0.351679787784458	0.411998396043781	-0.853595041052263	0.393329407128359	0.858285420121816
ENSMUSG00000096099.2	0	NA	NA	NA	NA	NA
ENSMUSG00000032482.9	15698.0923662157	0.0757517480055479	0.43837645508637	0.172800676511295	0.862808105264529	0.97173811422085
ENSMUSG00000048490.14	271.34924029866	-0.926062972985805	0.485469634634141	-1.907561064419	0.0564479715205737	0.716712293696906
ENSMUSG00000026667.14	1393.19957425035	-0.940125014586415	0.625975193901106	-1.50185666100842	0.133134131360283	0.809670952183297
ENSMUSG00000055485.6	2460.94963823369	0.562725068688947	0.463282871500339	1.2146468244478	0.224500821807741	0.829231175924863
ENSMUSG00000027867.10	3.43361133947937	1.06055185464197	2.02085237647576	0.524804219737962	0.599719297816377	NA
ENSMUSG00000030020.13	255.150259469774	-0.423356075399102	0.561704109318645	-0.753699444913514	0.451029715286237	0.871927817221244
ENSMUSG00000071856.10	617.301270480118	-0.0487111049778553	0.493540044126949	-0.0986973712822496	0.921378556088784	0.986150715886986
ENSMUSG00000054423.14	354.482364216916	0.40291218777018	0.523446687774287	0.769729176209667	0.441460559266482	0.869507939876001
ENSMUSG00000066640.11	2500.19174435529	0.410103515876352	0.482387861631286	0.850153058349165	0.395239995965414	0.858285420121816
ENSMUSG00000019471.10	7252.51537210078	0.388781128724837	0.428816431261226	0.90663766680153	0.364598436091975	0.855344219410791
ENSMUSG00000021782.14	1228.52543034573	-0.245312706764215	0.413842926605042	-0.592767668585365	0.55333664792583	0.896913003991245
ENSMUSG00000005506.16	4958.66306151091	-0.804850476679329	0.537680487257505	-1.49689359341372	0.134420947499628	0.809895303977135
ENSMUSG00000089715.12	4294.71974815647	0.440084485084912	0.432028078184719	1.01864787801303	0.308370165608827	0.84249089680945
ENSMUSG00000031732.12	380.082933387489	-1.08384164489249	0.551174083781655	-1.9664234527432	0.0492497165317672	0.68901358524198
ENSMUSG00000021413.9	598.03054296189	-0.737069433646771	0.590324884075227	-1.2485826932426	0.211817745619378	0.829231175924863
ENSMUSG00000112280.1	28.3363434244061	-1.61452250494307	1.03016746176725	-1.56724276864012	0.117057957095745	0.800742247513048
ENSMUSG00000066113.16	187.157183333472	-0.55197842973793	0.479255926186282	-1.15174043674398	0.249427750435822	0.83328917909799
ENSMUSG00000039176.17	5959.46173210727	0.322551884230032	0.438592856401193	0.735424390804453	0.46208107186562	0.873688206658327
ENSMUSG00000006527.16	398.700966591674	-0.600716731812229	0.459105921436506	-1.30844910458274	0.190721026580225	0.825325654482975
ENSMUSG00000039959.13	31666.652442634	0.0268351153429705	0.409894244650305	0.0654683877444155	0.94780107524589	0.992296536879148
ENSMUSG00000030268.17	918.241011201002	0.285221045422157	0.433022706290374	0.658674571284248	0.510104765430233	0.884354315015188
ENSMUSG00000022142.8	2386.99028590384	-0.719879637190645	0.464293279127034	-1.55048472496558	0.121025216985784	0.801999230979138
ENSMUSG00000030757.13	85.7441205991847	-0.976024112431362	0.588237734084768	-1.65923410872297	0.0970686269490403	0.789121842773781
ENSMUSG00000062818.7	0	NA	NA	NA	NA	NA
ENSMUSG00000022836.11	383.080783003034	0.0446882350491605	0.437417332805792	0.102163841479509	0.918626627859163	0.985746336627759
ENSMUSG00000041570.14	709.464763997364	-0.822480035521536	0.529818838967024	-1.55237974762299	0.120571386413389	0.801999230979138
ENSMUSG00000030554.16	119.051699195804	0.299976107736945	0.546787336476952	0.548615682414565	0.583269221241112	0.90286363807649
ENSMUSG00000044176.12	36.2710240872661	1.12419836247664	0.861937413062198	1.30426913304843	0.192141835717948	0.825325654482975
ENSMUSG00000055884.8	271.810915786312	-0.47825028050039	0.509246649697835	-0.93913289519757	0.347662516916167	0.848873089458508
ENSMUSG00000034320.14	222.075322237158	-1.12545292983212	0.535230805721386	-2.10274318630676	0.0354882247551371	0.628643147532732
ENSMUSG00000052572.17	5.23161544338097	-1.38316266947079	1.71970686548386	-0.80430141742885	0.421222919272711	0.862860117814821
ENSMUSG00000018750.14	285.80229157465	-0.327167161858908	0.452797465860963	-0.722546362393663	0.469958631816432	0.874341358146023
ENSMUSG00000078234.6	1139.73323143623	0.886265186090088	0.411831558361032	2.15200891747384	0.0313966520261248	0.606219499280433
ENSMUSG00000052085.7	1.8222417633101	-4.19666244865607	3.21811597451277	-1.30407433476398	0.192208238654266	NA
ENSMUSG00000047248.20	1369.48155719837	-0.774335646149105	0.473937021335627	-1.63383658859759	0.102293167399333	0.791186343380353
ENSMUSG00000027326.13	218.119999801866	0.0493470211041579	0.473935947025389	0.104121709724446	0.917072762627823	0.985619326117122
ENSMUSG00000026083.12	194.306040835123	-0.314593022119401	0.685756941812085	-0.458752953033332	0.646411583150343	0.921923368124014
ENSMUSG00000027663.12	3254.09783276793	-0.710252214091901	0.418269905232356	-1.69807152082181	0.0894942639285046	0.774049326867351
ENSMUSG00000100586.2	1.63745019136497	2.65453519864722	3.40412560639964	0.779799427393861	0.435508943459776	NA
ENSMUSG00000039748.11	1197.38717867465	-0.085874354169386	0.449773471426205	-0.190928010709666	0.848581994466986	0.968564650094918
ENSMUSG00000036381.13	0.214951870793757	-1.14900650751966	4.9950726440521	-0.23002798745837	0.818070021930774	NA
ENSMUSG00000020900.15	3501.16447857914	-0.631477409916145	0.422969607029432	-1.49296166774509	0.135447221153478	0.809895303977135
ENSMUSG00000065954.11	2902.25221467851	-0.915645937569835	0.506933527905544	-1.80624458073021	0.0708801441618551	0.750768795207585
ENSMUSG00000020121.15	183.19927487618	0.203782997847726	0.481268406808184	0.423428995057526	0.671982293735899	0.929038811675851
ENSMUSG00000024589.17	887.280761783476	0.113772984275111	0.414400904837298	0.27454810775517	0.783663438661833	0.953933092676077
ENSMUSG00000057406.16	3478.35512473981	-0.612333712864036	0.439534481261292	-1.39314146891702	0.163577015175329	0.815951612175072
ENSMUSG00000055489.8	0	NA	NA	NA	NA	NA
ENSMUSG00000024251.10	938.646257688917	-0.347726536999356	0.442384812146911	-0.78602729445395	0.431851496819374	0.86673743441743
ENSMUSG00000021275.16	1159.83271664243	-0.213886431551671	0.409366861785697	-0.522481059210992	0.601335430773083	0.906207227119671
ENSMUSG00000067242.11	2.68241085880984	1.02067768383493	2.2136001803873	0.461093964880482	0.644731191447859	NA
ENSMUSG00000110444.1	74.3175053679025	-0.171825665535418	0.642264334103395	-0.267531071572405	0.78906029405622	0.955424179323149
ENSMUSG00000040524.9	1012.79974090281	-0.102465262730621	0.415776046828954	-0.246443400268256	0.805339013415271	0.960242261770041
ENSMUSG00000024066.9	0	NA	NA	NA	NA	NA
ENSMUSG00000036790.5	279.352196718296	-1.16081086942159	0.674012877059811	-1.72223841551113	0.0850263385400973	0.762522966980736
ENSMUSG00000023868.17	634.735018893673	-0.373565245066761	0.443040421274085	-0.843185468252471	0.399124724340953	0.858523471885703
ENSMUSG00000027272.5	716.574914743738	-0.879170555225162	0.531288200377976	-1.65479029009056	0.097967044291879	0.789193042121322
ENSMUSG00000020114.12	5852.90021240077	-0.41366723298863	0.413045069096972	-1.00150628572571	0.316582102772514	0.843699396612436
ENSMUSG00000035181.6	1317.01179819355	-0.8054998177964	0.498355330836269	-1.61631624657195	0.106025955967015	0.791186343380353
ENSMUSG00000038774.9	227.055273068983	-0.620634812055725	0.516284985139932	-1.20211671832275	0.229318309871407	0.829231175924863
ENSMUSG00000058975.7	11096.613171314	0.501360555685196	0.457770657522746	1.09522213240652	0.273419331697945	0.839290322368936
ENSMUSG00000053253.16	1810.69285138473	-0.779160640904302	0.520601114844828	-1.49665572870804	0.134482861325059	0.809895303977135
ENSMUSG00000110519.2	0	NA	NA	NA	NA	NA
ENSMUSG00000028106.13	510.496535636465	-0.900886946072644	0.521495494671586	-1.72750667125127	0.0840767081045221	0.761439452125547
ENSMUSG00000001280.13	1526.68303515184	-0.877962737396977	0.498944581791071	-1.75963978653769	0.0784689011110812	0.754657703278176
ENSMUSG00000002897.5	611.554959339951	0.628126494258539	0.465423493757398	1.3495805490772	0.177150566841246	0.820335994164243
ENSMUSG00000060657.8	892.491777123172	-0.947955669207498	0.588232156941985	-1.61153323227956	0.107063549994195	0.791186343380353
ENSMUSG00000093942.3	0	NA	NA	NA	NA	NA
ENSMUSG00000036499.9	106.24846689829	-0.544763347822267	0.543354961719991	-1.00259201848055	0.316057748376467	0.843699396612436
ENSMUSG00000038126.17	427.579132664667	-0.368764878938842	0.53365329408902	-0.69101958710542	0.48955323202092	0.878227129962681
ENSMUSG00000052299.9	672.916100584466	-1.17044743934634	0.579019825999194	-2.02142895077305	0.0432353803024753	0.67299104301114
ENSMUSG00000041966.18	429.606877922204	0.301654862747207	0.438782442403224	0.687481616390653	0.491779281534565	0.879118945127712
ENSMUSG00000096188.1	3412.75034781552	-0.698200976508552	0.52207832726225	-1.33734909121756	0.18110871369475	0.821273097410324
ENSMUSG00000068036.15	1408.51374515591	-0.840759741527829	0.524108048796257	-1.60417254315945	0.108676025098577	0.791186343380353
ENSMUSG00000039852.17	1311.5617751675	0.480346855229445	0.428378915213487	1.12131302024998	0.262154645251979	0.836334801926177
ENSMUSG00000105449.1	14.8636280764949	-0.384934815762516	1.10376996271619	-0.348745507456335	0.727280376553849	0.941703097925123
ENSMUSG00000058881.13	1777.56553198443	0.0619536316788993	0.410216596156343	0.151026633879258	0.879954706072854	0.975453175719945
ENSMUSG00000043702.9	586.891588354958	-0.465833404652501	0.52754580017496	-0.883019833534848	0.377225555601437	0.857285339083029
ENSMUSG00000030583.16	838.305159682602	0.631702711855322	0.452248069145282	1.39680576867735	0.162471987109275	0.815951612175072
ENSMUSG00000095658.2	0	NA	NA	NA	NA	NA
ENSMUSG00000033623.13	2161.52375772926	-0.695837817633597	0.651871525081089	-1.06744625414807	0.285770371141417	0.839689233901408
ENSMUSG00000033713.12	1399.50980876651	-0.822557729783929	0.601358783060623	-1.3678319049362	0.171364698476651	0.820335994164243
ENSMUSG00000026812.16	1125.36099832411	-0.293366236983123	0.424687530727698	-0.690781376322595	0.489702940934432	0.878227129962681
ENSMUSG00000021767.18	717.285361683134	-0.269915039520464	0.420312014071106	-0.642177788129562	0.520757753248594	0.88731279319514
ENSMUSG00000002835.9	3617.53971983462	0.206700888831427	0.431889419518814	0.478596787718768	0.632225504022758	0.918132327121964
ENSMUSG00000002266.17	11.4315798343067	-0.0288769405682129	1.23699692039337	-0.0233443916408699	0.981375561941332	0.997971541004601
ENSMUSG00000035401.9	489.876631030254	-1.00102220647428	0.555750500157628	-1.80120792728096	0.0716701133733219	0.753773617904001
ENSMUSG00000046169.10	195.394800643194	-0.3047767033863	0.490426688262101	-0.621452116454593	0.534302190613893	0.890719563470507
ENSMUSG00000056919.9	120.188363657642	-1.21161668110249	0.722785020922611	-1.67631681071074	0.0936761538340829	0.781245657902783
ENSMUSG00000061436.15	669.583354634311	-0.754042960354201	0.455195597172693	-1.65652516201322	0.0976155137904048	0.789193042121322
ENSMUSG00000036473.16	793.640542415069	-0.115560443049938	0.470955613937426	-0.245374382702002	0.806166562443796	0.960784599941709
ENSMUSG00000054555.11	5098.01102379101	-0.622616754251294	0.50915708886452	-1.22283823179169	0.221390802142877	0.829231175924863
ENSMUSG00000040855.15	78.019552881993	-0.346393898511654	0.664310607424445	-0.521433640589656	0.602064721778583	0.906342172049423
ENSMUSG00000096822.2	0	NA	NA	NA	NA	NA
ENSMUSG00000038002.9	622.226354561777	-0.121704620234127	0.421654188010853	-0.288636099663249	0.772859867162559	0.950845111517009
ENSMUSG00000025899.14	161.776889363319	-0.661675523791892	0.51099623237095	-1.29487358590065	0.19536384186102	0.826694534778231
ENSMUSG00000033396.13	1295.90324094762	-0.347408205107864	0.411217312202702	-0.844828743340007	0.398206463811297	0.858285420121816
ENSMUSG00000021096.11	3322.50171117369	-0.209195378607705	0.431330050509655	-0.485000705052944	0.627675845383418	0.916866370507646
ENSMUSG00000027966.20	2527.34749257761	-1.23839631392301	0.447938121433857	-2.76465934615899	0.00569822686030367	0.24232310653073
ENSMUSG00000034525.7	1523.69942150735	-0.890365467074725	0.501748132361884	-1.7745267189805	0.0759760665345472	0.753773617904001
ENSMUSG00000061731.9	4527.57920116744	-0.0447696353867981	0.401782355978682	-0.111427579436001	0.911277291008397	0.983445228375174
ENSMUSG00000025959.13	448.62250452514	-0.573787412147524	0.496043491437789	-1.1567280330287	0.247383492728117	0.833143835152256
ENSMUSG00000030074.9	228.831081480302	1.24151931939516	0.469177186703511	2.64616301597741	0.00814105736551513	0.31143178823705
ENSMUSG00000033295.14	16986.924742899	-0.00101007389949373	0.4609667317109	-0.00219120780309848	0.998251670523466	0.999744545551391
ENSMUSG00000039968.9	113.258451383742	-1.00230058310773	0.535678598447216	-1.8710857331488	0.0613331987469029	0.732115169697613
ENSMUSG00000005893.14	911.426302274755	-0.888195671969469	0.486609352135496	-1.82527456176418	0.0679596069374868	0.744943145665173
ENSMUSG00000040605.7	2313.74138969559	1.42123860690376	0.420840591051174	3.37714240766033	0.000732431191447183	0.0597733607572467
ENSMUSG00000006362.16	2.8827017586093	0.72259915813546	2.17158009900825	0.332752707793494	0.739320959430815	NA
ENSMUSG00000020580.10	464.518690438832	-0.96565030083348	0.530785169830135	-1.81928651311511	0.0688677299138179	0.746052563377378
ENSMUSG00000040760.11	204.451009568144	-0.853379880775886	0.547977166461808	-1.55732744538611	0.119392762468022	0.801214862689238
ENSMUSG00000039630.10	11157.6207618639	-0.677010465315041	0.43924990471343	-1.54128767712933	0.12324678668404	0.80257775634329
ENSMUSG00000026349.14	545.745057485108	-0.819181874468209	0.564011425148029	-1.4524207098344	0.146384661313499	0.815951612175072
ENSMUSG00000060988.12	1.57336041248301	-1.1887567046848	3.02697401897029	-0.392721145683696	0.694525450950424	NA
ENSMUSG00000042345.15	0	NA	NA	NA	NA	NA
ENSMUSG00000051786.15	1502.55336002803	0.361170626463695	0.448998347834898	0.804391882966353	0.421170687506521	0.862860117814821
ENSMUSG00000025314.16	1446.85724503741	-0.393657526356007	0.546266401824125	-0.72063287260846	0.471135423088697	0.874341358146023
ENSMUSG00000103976.1	0.31004182116606	1.86993753835657	4.97468760336826	0.375890445279512	0.7069983440692	NA
ENSMUSG00000058099.16	6.42480496838353	3.12443106522768	1.65606073022458	1.8866645456921	0.0592054592243115	0.724498714674811
ENSMUSG00000023977.15	1757.49604613916	-0.620402074472065	0.406060400693259	-1.5278566277649	0.12654813884084	0.805470426039479
ENSMUSG00000028890.13	750.409505783937	-0.366528096102856	0.451448186354313	-0.811894049376445	0.416852429246309	0.861373319299917
ENSMUSG00000046634.12	11.6005169223216	-1.97507109641613	1.20688697372077	-1.63650046725345	0.101734887992633	0.790717691799433
ENSMUSG00000032407.14	668.249379625118	-0.966021520348089	0.513670501513596	-1.88062487042098	0.0600229661328637	0.727484095118026
ENSMUSG00000061414.8	26.8011060891917	0.898533694074055	0.87806410846302	1.02331217665515	0.306160268281982	0.84249089680945
ENSMUSG00000037475.15	306.086194144345	-0.839137311521923	0.5762098329538	-1.45630508806191	0.145308299617298	0.815951612175072
ENSMUSG00000026478.14	8787.95923476057	0.241230161974486	0.397035912441355	0.607577688605481	0.543467602260896	0.89220623360573
ENSMUSG00000003418.11	0.444564712581806	-2.16344143391398	4.89227471372315	-0.442215852647314	0.658333015660263	NA
ENSMUSG00000034156.16	64.6936382681221	1.93211671158248	0.697424500744763	2.77035967265162	0.00559944223756034	0.239908102668273
ENSMUSG00000027778.15	452.175090336937	-1.00890558801225	0.609746645085809	-1.65463081452506	0.097999408912155	0.789193042121322
ENSMUSG00000057110.15	436.848325069705	-1.02692524825132	0.575445176793921	-1.78457529868059	0.0743302310178083	0.753773617904001
ENSMUSG00000045672.15	278.015748024876	0.0805530955924155	0.480014035911984	0.167814042019359	0.866729575229983	0.972630399442866
ENSMUSG00000025907.14	220.305324973849	-1.11388457514353	0.524311584132463	-2.12447065610153	0.0336308072442748	0.616858009060351
ENSMUSG00000039068.16	901.354627342068	-0.643899309556958	0.581822989180027	-1.1066927940823	0.268426771922787	0.839290322368936
ENSMUSG00000046111.17	218.513950789976	-0.824328250833101	0.554186797021497	-1.48745559306626	0.136894523362699	0.809895303977135
ENSMUSG00000053965.10	44.7864604310593	-0.335818715146482	0.725649040762397	-0.462783930360683	0.643519250866827	0.921202215281965
ENSMUSG00000117238.1	0	NA	NA	NA	NA	NA
ENSMUSG00000040651.9	197.65119180218	-0.785827563804026	0.479851881805109	-1.63764610205945	0.101495540019489	0.790256855363414
ENSMUSG00000046650.4	0	NA	NA	NA	NA	NA
ENSMUSG00000038708.10	685.132422413803	-0.891082580520634	0.520710051429007	-1.7112836175818	0.0870287690898988	0.765306126687798
ENSMUSG00000019947.10	337.563772539562	-1.08955559276656	0.505009145322841	-2.15749675596474	0.0309669796232697	0.601714395446255
ENSMUSG00000071064.13	1057.07459279227	0.0622075820068228	0.411378023993347	0.151217562384491	0.879804096821805	0.975453175719945
ENSMUSG00000056900.13	177.553353935584	-0.0417254461074095	0.485395753194547	-0.0859617040998007	0.931496860198568	0.988619950690484
ENSMUSG00000091407.2	0	NA	NA	NA	NA	NA
ENSMUSG00000074151.13	14.492342812533	1.98791023741103	1.1133770547606	1.78547800038728	0.0741838166386841	0.753773617904001
ENSMUSG00000089945.13	0	NA	NA	NA	NA	NA
ENSMUSG00000054142.5	0	NA	NA	NA	NA	NA
ENSMUSG00000048874.15	733.250669984139	-0.987930486632007	0.57361985452302	-1.72227386978001	0.0850199188541251	0.762522966980736
ENSMUSG00000022883.11	1132.86113911199	-0.653792457892583	0.51835338028915	-1.26128715033725	0.207205409087099	0.828918370899792
ENSMUSG00000030077.11	716.319579016488	-0.530188005876477	0.552380217798051	-0.959824390507612	0.337143604653612	0.845968828192329
ENSMUSG00000058589.14	804.987902252987	-0.845446681911513	0.476487648178388	-1.77433074108774	0.076008458546658	0.753773617904001
ENSMUSG00000029910.14	1346.13688339617	-0.444469566985214	0.447143415262112	-0.994020155087534	0.320213055144333	0.843699396612436
ENSMUSG00000050229.3	1718.4046112206	-0.66145118522822	0.427269095600471	-1.54809040026318	0.121600533020079	0.801999230979138
ENSMUSG00000020160.18	1379.54453679266	0.0376647162555411	0.437190761324066	0.086151674709389	0.931345845806681	0.988619950690484
ENSMUSG00000095916.2	0	NA	NA	NA	NA	NA
ENSMUSG00000031441.15	2599.9797594343	-0.550869164985478	0.437687319545426	-1.25859064310476	0.208178228445363	0.829231175924863
ENSMUSG00000041341.10	1636.85860563555	-0.361439916379063	0.416408846121804	-0.867992886667298	0.385398226774869	0.858285420121816
ENSMUSG00000029651.16	17.8588358509162	2.64501134316099	1.11198784885823	2.37863331499246	0.0173769521268559	0.481108571163257
ENSMUSG00000021182.16	4029.22902384469	0.22938487123756	0.421547447575157	0.54414959112441	0.586338537027426	0.903658485532089
ENSMUSG00000114982.1	0	NA	NA	NA	NA	NA
ENSMUSG00000051527.11	150.031554279832	-0.868998952558924	0.642843583541856	-1.35180466105149	0.176437812682309	0.820335994164243
ENSMUSG00000024759.14	901.139193672263	-1.23631439667783	0.575067425353742	-2.14985989845857	0.0315662984949498	0.606326579651397
ENSMUSG00000054199.17	1539.84206440989	-0.108754015851504	0.406493268164943	-0.267541984993894	0.789051892523873	0.955424179323149
ENSMUSG00000043460.7	72.1374154518703	0.197765234402015	0.604531821369027	0.327137840244958	0.743563632595153	0.945609069907255
ENSMUSG00000027678.17	893.956302092082	-0.222675753043861	0.427777493455498	-0.520541067378587	0.602686512298406	0.906595404877564
ENSMUSG00000116851.1	0.234639558262821	1.6664677880616	4.98744180465523	0.334132778553152	0.738279366382608	NA
ENSMUSG00000069895.4	1863.90939847573	-0.720854826434809	0.539801509535726	-1.33540720746558	0.181743107102485	0.821273097410324
ENSMUSG00000001089.14	1029.8351795454	-0.929165650387157	0.592364107525673	-1.5685718269939	0.116747741330218	0.800742247513048
ENSMUSG00000079429.9	0	NA	NA	NA	NA	NA
ENSMUSG00000019866.14	10.4737034981415	-0.632387136375947	1.23520091824894	-0.511971070481746	0.60867125656429	0.909687130831471
ENSMUSG00000046138.15	162.748074887506	-0.598306365398375	0.50423919833039	-1.18655266663015	0.235404115715861	0.831997470641045
ENSMUSG00000074305.9	377.654000439479	-1.04181100268454	0.507590221090025	-2.05246468390842	0.0401245238361162	0.662746681372758
ENSMUSG00000040265.16	159.332259254419	0.151025550919829	0.495716851570254	0.304660917702179	0.760624418480179	0.948497231167795
ENSMUSG00000028402.18	700.704492809199	-0.65461726124974	0.460658232351096	-1.42104756905943	0.155302930872738	0.815951612175072
ENSMUSG00000021990.15	1678.90863239419	-0.316354292240587	0.40728624355724	-0.776736993318378	0.437313956540894	0.867930343882203
ENSMUSG00000024008.16	8.10080014985708	0.0267148393132689	1.40667064595051	0.0189915382041809	0.984847855728631	0.998302837890316
ENSMUSG00000031256.11	2501.9251172318	-0.501508722266972	0.473568337418975	-1.05899968946462	0.289599921144398	0.839689233901408
ENSMUSG00000052942.13	1748.14766395957	0.14278696730188	0.412358728362033	0.346268812761784	0.729140704330577	0.942405045668402
ENSMUSG00000024593.15	335.6102944085	-0.651501250245428	0.512481113791482	-1.27126879940108	0.203633038121981	0.828656558037319
ENSMUSG00000000631.20	4975.45912887893	-0.0122953165960039	0.439775745130424	-0.0279581507896884	0.977695528919593	0.997303752923729
ENSMUSG00000075592.10	263.387640729698	-0.141501658313992	0.50267423155608	-0.281497736368858	0.778328664037143	0.952029368892345
ENSMUSG00000079020.9	1795.95204578616	-0.170726050439325	0.421720774182098	-0.404831966768623	0.685601029567978	0.930843642699894
ENSMUSG00000058690.14	2154.23011328233	-0.625028222771235	0.608905301005826	-1.02647853736661	0.304666075210152	0.84249089680945
ENSMUSG00000030761.15	294.798674428956	-0.866851434182311	0.515582062695549	-1.68130642414181	0.0927034107255846	0.781245657902783
ENSMUSG00000074405.8	1090.42204208637	0.232479250251613	0.444446953367592	0.5230753602654	0.600921811415426	0.906207227119671
ENSMUSG00000038119.15	3377.3489133532	-0.20659722476119	0.462881002694457	-0.446329020976398	0.655359595982727	0.924714131215575
ENSMUSG00000054976.14	0	NA	NA	NA	NA	NA
ENSMUSG00000048391.3	0	NA	NA	NA	NA	NA
ENSMUSG00000030249.15	0	NA	NA	NA	NA	NA
ENSMUSG00000045180.13	856.700395820518	-0.217161933863531	0.531202886604781	-0.408811659988401	0.682677882383981	0.930622993428448
ENSMUSG00000026469.14	934.091493882034	-1.33704012121779	0.53067468205939	-2.51950991147558	0.0117518331743306	0.383907690579044
ENSMUSG00000039579.15	378.13193476496	-1.11235250983572	0.495721398660743	-2.24390658309463	0.0248384125039558	0.555033266699405
ENSMUSG00000005374.13	2143.8982565062	-0.249171177625638	0.422048900061071	-0.590384615596872	0.554932822318279	0.89798489258796
ENSMUSG00000040111.16	231.741733717117	-0.609583401085745	0.464878749243222	-1.31127396569124	0.18976522079206	0.825325654482975
ENSMUSG00000028753.12	160.390682817666	-1.9397907224912	0.506530801508036	-3.82956123638697	0.000128371937010873	0.0151726776309817
ENSMUSG00000039046.15	600.194903704291	-0.646536981954324	0.605101874417336	-1.06847625051052	0.285305737798382	0.839689233901408
ENSMUSG00000020422.13	2917.43525768349	0.112318367768737	0.400764289683134	0.280260419054657	0.779277715398885	0.952518471329155
ENSMUSG00000007817.15	1128.67001862278	-0.414405994578377	0.417413449539858	-0.992795021423493	0.320809856642286	0.843699396612436
ENSMUSG00000063273.11	385.742751021171	-0.713475197452033	0.479009395731368	-1.4894805901723	0.1363608607779	0.809895303977135
ENSMUSG00000006005.18	979.084279574769	-0.947463271546119	0.494710853303928	-1.91518594188602	0.0554687946682579	0.714846977963827
ENSMUSG00000041459.15	3179.32154568544	-0.637317553343612	0.522252368271528	-1.22032486985729	0.222341745582621	0.829231175924863
ENSMUSG00000024477.4	345.959498468957	-0.291115892859812	0.552982365802813	-0.526446973471159	0.598577685733371	0.905602798442133
ENSMUSG00000026135.17	485.266750113437	-0.534412609955298	0.432634289459942	-1.23525255157747	0.216736526612043	0.829231175924863
ENSMUSG00000063919.11	3.18431081022226	0.919601508290784	2.16235191165923	0.425278375518974	0.670633755520077	NA
ENSMUSG00000054752.16	49.4677823580395	-0.0446415063055651	0.684683168814208	-0.0652002390870497	0.948014570771797	0.992296536879148
ENSMUSG00000022237.17	163.578721730292	-0.966497811360844	0.503950075471089	-1.91784436277218	0.055130748714672	0.713618407456231
ENSMUSG00000020275.9	33.5242304069487	-1.18657754980751	0.763525291494037	-1.55407759641552	0.120165908471082	0.801999230979138
ENSMUSG00000015133.17	612.47784676546	0.538389291621856	0.459480313132375	1.17173527621138	0.241303355456588	0.832237885230054
ENSMUSG00000048249.14	177.678087036854	-0.450257672512647	0.495067266101741	-0.909487868301345	0.363092658726829	0.854822373161201
ENSMUSG00000033854.10	81.6743859412732	-0.409829124454189	0.583527475627731	-0.702330466981549	0.482473097265995	0.87556409496556
ENSMUSG00000027177.14	731.980872692082	0.108700789074575	0.450984228941539	0.241030133868974	0.809531761449702	0.96189372389144
ENSMUSG00000036959.15	225.346221034179	-0.0842803383799147	0.47136962517553	-0.178798831911433	0.858095662503648	0.97108632487286
ENSMUSG00000030536.10	1032.2676894529	-0.786451298855195	0.474621150160316	-1.65700853952579	0.0975177486170149	0.789193042121322
ENSMUSG00000061410.6	2588.59881771767	-0.183534741430244	0.417431649340262	-0.439676152300178	0.660171677126356	0.926710325093771
ENSMUSG00000010277.7	26596.5993040632	-0.622667034383572	0.425610691836087	-1.46299669234667	0.143468284026464	0.815951612175072
ENSMUSG00000020850.14	6428.90853368687	-0.133161205390766	0.40144958354127	-0.331700942908257	0.740115088616041	0.945515645821969
ENSMUSG00000043733.14	7876.22337538399	-0.339263402284054	0.400007010525904	-0.848143640877722	0.396357979900687	0.858285420121816
ENSMUSG00000000902.13	5302.89432689275	0.497496058194277	0.442089653872468	1.1253284347111	0.260449884694937	0.836276597713788
ENSMUSG00000115275.1	3.05325153799016	-0.859107094371329	2.11907598122001	-0.405415899186737	0.685171826058003	NA
ENSMUSG00000041890.17	1496.389016969	-0.0931147429539382	0.409246449448066	-0.227527308006015	0.82001373728049	0.962747894970423
ENSMUSG00000056493.9	1235.44452032692	0.225175164788923	0.462938006734098	0.486404575803729	0.626680346920321	0.915917430114316
ENSMUSG00000056537.11	631.12124088866	-0.883715270648218	0.550534770054303	-1.60519429238057	0.108451053168236	0.791186343380353
ENSMUSG00000042390.9	811.983216602308	-0.838764412308058	0.439708694808185	-1.90754565968716	0.0564499642463883	0.716712293696906
ENSMUSG00000040118.15	519.214334573874	-0.280655881922349	0.524012457310452	-0.535590095248583	0.592241875631734	0.905305978190663
ENSMUSG00000045341.2	0	NA	NA	NA	NA	NA
ENSMUSG00000022443.17	19666.6329162634	-0.187120226875481	0.4270847527972	-0.438133709175834	0.661289359689847	0.926710325093771
ENSMUSG00000031450.8	6.14545927248842	-1.12507560810457	1.5411701349502	-0.730013891776409	0.465381693229561	0.874341358146023
ENSMUSG00000091358.2	0	NA	NA	NA	NA	NA
ENSMUSG00000026579.8	7.36456468640123	2.84585488909698	1.53908913342223	1.84905138194894	0.0644503936937031	0.742659279496764
ENSMUSG00000032845.16	0.524993691959816	0.44114330293762	4.97226014257642	0.0887208815082306	0.929303736932503	NA
ENSMUSG00000027993.16	113.69273733942	-0.537200286891401	0.530855232298107	-1.01195251399487	0.311560758664074	0.843437277467051
ENSMUSG00000052565.7	43076.6902116301	0.872342475914811	0.44206339963548	1.97334245864764	0.0484565586102494	0.688787329962153
ENSMUSG00000019893.13	0	NA	NA	NA	NA	NA
ENSMUSG00000038594.9	52.5882529010571	-0.417327251320612	0.658950629269237	-0.633320969407707	0.526524062391615	0.888394157441629
ENSMUSG00000020620.14	90.889920643292	-0.365629874574921	0.624442641243245	-0.585529959720502	0.558191427800783	0.89798489258796
ENSMUSG00000047935.17	57.2280656097005	1.94771306625442	0.71735729036933	2.71512270440806	0.00662512184690254	0.2709817141103
ENSMUSG00000062627.9	106.682289821915	-1.15695256798356	1.6179210700398	-0.71508591451566	0.474555957014806	0.874341358146023
ENSMUSG00000062372.13	0	NA	NA	NA	NA	NA
ENSMUSG00000034422.14	4.74479564139287	-0.581545544037869	1.91658369213136	-0.303428202183623	0.761563555881917	NA
ENSMUSG00000020196.10	3178.21952683144	0.193159301977257	0.448400863239233	0.430773706771839	0.666632919508054	0.927465594559212
ENSMUSG00000027971.16	3.84058606680494	-1.14447127057714	2.07046530069799	-0.552760420660667	0.580427473908717	NA
ENSMUSG00000034021.15	470.676412259727	-1.10453795988473	0.517869956458051	-2.13284811391488	0.0329371878626845	0.611528545630023
ENSMUSG00000041852.15	4536.33449467406	-1.08528824784776	1.27250391575139	-0.852876155753844	0.393727985826232	0.858285420121816
ENSMUSG00000069114.8	252.074981472399	-0.281839087503293	0.501035063301462	-0.562513700430814	0.573766071823161	0.901242656608675
ENSMUSG00000033610.16	398.840401041832	-0.499954226320009	0.492817291259715	-1.01448190878622	0.310352857646651	0.843165818230377
ENSMUSG00000036617.16	42.6559383456952	-0.117400202327159	0.689554894353696	-0.170255049001132	0.864809560766632	0.971935448077324
ENSMUSG00000040711.7	7725.71862749027	0.383720024817655	0.414536323816596	0.925660799238969	0.354622286022019	0.852147607661997
ENSMUSG00000037111.9	1434.65816075252	-0.641885876497572	0.530344323556021	-1.21031912285523	0.226156462608333	0.829231175924863
ENSMUSG00000036333.11	2908.32202769198	-1.28168377878245	0.516691171128678	-2.48056063350704	0.0131175951757638	0.408002443053066
ENSMUSG00000045515.3	4616.41545532616	0.175302710717892	0.400845818608512	0.437332017897642	0.661870578438469	0.926710325093771
ENSMUSG00000029673.17	323.679945405141	0.185354483302315	0.448335436030001	0.413428135290005	0.679292964604096	0.930581952465669
ENSMUSG00000034111.6	494.694762835345	-0.555903641937318	0.562576105926774	-0.988139446522593	0.323084359181338	0.844372950504973
ENSMUSG00000040433.16	144.550230132357	-1.30416182666132	0.595543136287722	-2.18986962857254	0.0285336931944307	0.582677431565718
ENSMUSG00000011960.12	781.70880169833	-1.00562270160325	0.51219252554727	-1.96336856054032	0.0496033642200886	0.691140208133235
ENSMUSG00000036745.15	220.871232396441	-0.148235119099308	0.531828607662089	-0.278727238369045	0.780454157380916	0.952869085217221
ENSMUSG00000079470.8	242.233426831662	-1.03198602724956	0.600985278153499	-1.71715691675559	0.0859505050394387	0.764405588278325
ENSMUSG00000035916.8	2.95810402151254	0.773628559687749	2.13833004691679	0.361790997046142	0.717508220384945	NA
ENSMUSG00000022024.10	2083.92270316589	-0.454019745076634	0.52780904647633	-0.860196974848544	0.389680471975435	0.858285420121816
ENSMUSG00000049323.8	1165.91614115958	-0.477376039219878	0.473675413775334	-1.00781257658076	0.313544447092208	0.843699396612436
ENSMUSG00000034416.18	1.74385262575855	-0.0733103425664625	2.67657034412653	-0.0273896565906944	0.97814894800017	NA
ENSMUSG00000041757.16	66.3965600965284	0.600733232307911	0.624040473554725	0.962651074354121	0.335722657197387	0.845232338610262
ENSMUSG00000034663.13	297.841011252967	-0.925299648458634	0.585782992377958	-1.5795945947533	0.114199737907332	0.798838819696269
ENSMUSG00000024750.11	1045.93044912286	-0.61524074833892	0.561951237577602	-1.09482942148332	0.273591374225484	0.839290322368936
ENSMUSG00000030231.11	421.315593906441	-0.461970445082547	0.44294771837505	-1.04294576068093	0.2969734141208	0.839974355971123
ENSMUSG00000032340.8	3021.83045641823	-0.672285334247701	0.449220307795832	-1.49656042387392	0.134507674414537	0.809895303977135
ENSMUSG00000018846.8	915.653377905281	-0.984116122930604	0.572788371326675	-1.71811470378008	0.0857756953708203	0.764405588278325
ENSMUSG00000031327.10	76.9881683485683	-0.758281887172847	0.686750574250234	-1.10415908716306	0.269524133648179	0.839290322368936
ENSMUSG00000027854.12	1736.76222347558	-0.424703352971864	0.465033362927263	-0.913275018158844	0.361097917764842	0.854822373161201
ENSMUSG00000061136.14	590.714035982701	-0.900185484064364	0.50302707840762	-1.78953683152403	0.0735284013344868	0.753773617904001
ENSMUSG00000032572.9	4.13130181282664	1.48389475298363	1.89057158414968	0.784892127557838	0.432516818139502	NA
ENSMUSG00000042035.11	739.811838640219	-0.89290236249706	0.418382425614681	-2.13417750801846	0.0328282531204516	0.611528545630023
ENSMUSG00000040624.17	233.251990341621	0.0599867967158076	0.578137736927748	0.103758659717631	0.917360874095418	0.985619326117122
ENSMUSG00000092090.2	0.64485561238127	-2.70320785202282	4.85897041897582	-0.556333465514821	0.577982913644895	NA
ENSMUSG00000015944.9	726.794875097555	-0.552213718978518	0.424137738359015	-1.30196789636081	0.192927360351381	0.826044124002817
ENSMUSG00000022623.16	429.912031979229	0.087746345849063	0.476009726477172	0.18433729600118	0.853748857242036	0.969694848189173
ENSMUSG00000042410.16	676.368151352141	-0.63201563098014	0.640988472903884	-0.986001554937338	0.324132349825557	0.844910646516937
ENSMUSG00000019913.4	2.30199349121531	1.3339959231951	2.6432824126666	0.504674005623689	0.613787821453035	NA
ENSMUSG00000030607.7	9.89000189985038	-0.824736124852834	1.27469544801683	-0.64700640936308	0.517627795327712	0.886844462293945
ENSMUSG00000032411.15	746.289855006886	-0.882302643004618	0.600570722336144	-1.46910698472375	0.14180377356527	0.813875777415136
ENSMUSG00000036990.13	635.894068667289	-0.509553778058561	0.497628760967499	-1.02396368141559	0.305852429550501	0.84249089680945
ENSMUSG00000025041.17	1123.26457095831	0.0585363427065464	0.409791988946471	0.1428440386476	0.886413355875448	0.976937746246984
ENSMUSG00000036591.16	1067.17906048539	-0.980995280064394	0.516937276151145	-1.89770659869683	0.0577347428367529	0.720460955956678
ENSMUSG00000118017.1	0	NA	NA	NA	NA	NA
ENSMUSG00000104388.1	8.32429992241457	-1.73084086914954	1.38684491702503	-1.24804211913069	0.212015633075847	0.829231175924863
ENSMUSG00000062115.15	702.245937251157	-0.114955457634152	0.440184324642686	-0.261153001591926	0.793974520013273	0.957731000713165
ENSMUSG00000039929.14	904.286233872243	-0.0527488329730007	0.436162788305934	-0.120938407372803	0.903739820739405	0.982198904503705
ENSMUSG00000061859.16	67.0815586649514	-0.0903350365169849	0.638268884751011	-0.141531318030997	0.887450220835753	0.977266826894828
ENSMUSG00000092162.3	0	NA	NA	NA	NA	NA
ENSMUSG00000022946.10	545.948803010125	-0.257531480043634	0.45092098763796	-0.571123294554662	0.56791606911721	0.89971785582231
ENSMUSG00000020859.16	2330.21938308729	-1.28782971179932	0.594275261463882	-2.16705926581397	0.0302303353840599	0.596048252496676
ENSMUSG00000034810.7	9.60090530144345	0.5021307279118	1.25736263796473	0.399352352893665	0.689633596720657	0.9319461110707
ENSMUSG00000037705.13	41.9769003169176	-0.752561890308271	0.704133267965421	-1.06877763705553	0.285169878399535	0.839689233901408
ENSMUSG00000027479.14	5660.52237484571	-0.532839638266697	0.494185621132236	-1.07821760788163	0.280936655870645	0.839290322368936
ENSMUSG00000061607.15	1709.79111776288	-0.311294710755501	0.42009577895316	-0.741008899282964	0.458688044436608	0.872758554906124
ENSMUSG00000000131.15	4582.03958841374	0.215375647644612	0.422101139550815	0.510246543929749	0.609878747982696	0.910299142720448
ENSMUSG00000053024.14	5.23496393035399	-0.301451743944308	1.62620216494386	-0.185371628720415	0.852937559756381	0.969694848189173
ENSMUSG00000020647.10	811.656386206902	-1.16221516915527	0.555622549075219	-2.09173506562983	0.0364622218813791	0.636992414478161
ENSMUSG00000033350.7	20584.0035991813	0.483095128284588	0.423393743318584	1.14100677184802	0.253867104964851	0.83506523083802
ENSMUSG00000029245.16	639.4443042624	-1.0987442761994	0.423875589079271	-2.59213860035218	0.00953813362756786	0.345590981203505
ENSMUSG00000033088.19	2864.74686735874	0.533975569930923	0.454454294468135	1.17498189901771	0.240001957621158	0.832237885230054
ENSMUSG00000037355.14	101.665604590337	-0.151775419376188	0.568228163000307	-0.267102951347567	0.78938989527746	0.955424179323149
ENSMUSG00000105985.1	0.938558233051284	3.53392674096135	4.53194056448466	0.779782234713222	0.435519064895525	NA
ENSMUSG00000028176.11	337.849094935259	-0.233783844002652	0.444221527637245	-0.526277610286284	0.598695337066608	0.905602798442133
ENSMUSG00000045776.3	0.229612841788049	-1.19704868042682	4.99171724895189	-0.239806988402271	0.810479889073532	NA
ENSMUSG00000039835.16	1593.47226595861	-0.409177399344205	0.424986240285716	-0.962801522866051	0.335647136361024	0.845232338610262
ENSMUSG00000040990.17	372.379692468434	-0.549025858212077	0.481038963606742	-1.14133344645428	0.253731188750185	0.83506523083802
ENSMUSG00000029004.15	230.995195309034	-0.476921457361738	0.472791155975653	-1.00873599544721	0.31310126396187	0.843699396612436
ENSMUSG00000042425.18	7.7807544898163	0.365861867748237	1.46870568343555	0.249104958110072	0.803279594311529	0.960173230557269
ENSMUSG00000028385.14	358.362175345741	-0.56890501268838	0.564034010339811	-1.00863600821808	0.313149231639021	0.843699396612436
ENSMUSG00000022533.14	725.081075266761	-0.853728723591038	0.555926407928629	-1.53568657904203	0.124615268248533	0.803660266410678
ENSMUSG00000037999.13	906.270508166128	-0.495875898448175	0.464639559927237	-1.06722703190798	0.285869328684762	0.839689233901408
ENSMUSG00000057637.13	745.720156663061	-0.585366648455624	0.459631497032174	-1.27355642995599	0.202820661770325	0.828237856172928
ENSMUSG00000038342.15	376.284435840855	-0.436785826130817	0.440690989931925	-0.991138544035785	0.32161793430208	0.843699396612436
ENSMUSG00000074785.5	399.221558499612	-0.803592110454109	0.564369022991074	-1.42387706928914	0.154482060800216	0.815951612175072
ENSMUSG00000025427.15	79.860086071855	0.308130336605524	0.613712536575826	0.502076001778813	0.615614060412122	0.912147352133814
ENSMUSG00000066129.15	62.2222129157286	0.896422825673877	0.614327468188164	1.45919378848173	0.144511777956167	0.815951612175072
ENSMUSG00000030879.10	5604.10641611004	0.493170004930184	0.425440787385991	1.15919775337089	0.246375587016291	0.833143835152256
ENSMUSG00000061175.11	645.8409881178	-0.507122038905885	0.517756676580387	-0.979460163131569	0.327352662867489	0.844910646516937
ENSMUSG00000005621.11	1112.01088566351	-0.0593919205943451	0.431508360698592	-0.137637937068455	0.890526571410469	0.978811584716589
ENSMUSG00000004677.17	5613.96301846452	0.376210541017386	0.430551902945897	0.873786733825355	0.382234406331681	0.858285420121816
ENSMUSG00000095649.3	0	NA	NA	NA	NA	NA
ENSMUSG00000086513.3	0	NA	NA	NA	NA	NA
ENSMUSG00000073902.5	0	NA	NA	NA	NA	NA
ENSMUSG00000117309.1	2.99209106765119	-3.24507371536499	2.50886170486311	-1.29344463629654	0.195857320569047	NA
ENSMUSG00000002489.16	776.350926128555	-0.251331392958729	0.440418727888292	-0.57066463582011	0.568226995171865	0.89971785582231
ENSMUSG00000063286.7	0	NA	NA	NA	NA	NA
ENSMUSG00000062580.9	3770.99063760091	0.358912727180824	0.401949669644328	0.892929523983473	0.371894915215202	0.855344219410791
ENSMUSG00000025060.14	441.862576481701	-0.827329018632369	0.537350637050878	-1.53964462231397	0.123647002244471	0.80257775634329
ENSMUSG00000024163.17	3682.2240803338	0.321582573884812	0.42563738314015	0.755531789788595	0.449929965462168	0.871927817221244
ENSMUSG00000041734.15	2676.90745141659	0.318562493630061	0.402146647903717	0.792155039189415	0.42827028085231	0.864978093987591
ENSMUSG00000095457.3	0	NA	NA	NA	NA	NA
ENSMUSG00000009292.18	7.41022582888586	1.88591284526505	1.46679349540603	1.28573848409589	0.198534345530314	0.827154552458072
ENSMUSG00000026339.18	770.018864866299	-0.528048422610218	0.449371179775221	-1.17508297455647	0.239961521390578	0.832237885230054
ENSMUSG00000038437.11	2771.10370605765	0.310416295603262	0.467563135909438	0.663902416086511	0.506752769796329	0.88395960895225
ENSMUSG00000052105.17	914.447421895005	0.171362483328481	0.457292499858707	0.374732765968016	0.707859221282993	0.936801910392491
ENSMUSG00000017550.14	133.551423047666	-0.648010884746121	0.521502786230173	-1.24258374424123	0.214021263201217	0.829231175924863
ENSMUSG00000022214.15	1982.17891268289	0.187546138633143	0.431897303753704	0.43423780839367	0.664115760337034	0.926860784308315
ENSMUSG00000023066.10	404.599452588614	-0.833635895316729	0.471868817143285	-1.76666875417536	0.0772837191198855	0.753773617904001
ENSMUSG00000036545.8	266.962241020275	0.700523267056634	0.513325794600273	1.36467575646015	0.172354982672667	0.820335994164243
ENSMUSG00000023169.15	2069.57055549532	-1.71170774915006	0.466156649887098	-3.67195823456477	0.000240699025422572	0.0256217384949816
ENSMUSG00000054874.12	4069.99048874262	0.317469701650404	0.498846792735351	0.636407222164557	0.52451103479587	0.88795260679889
ENSMUSG00000003382.18	646.506429854437	-0.850597161596336	0.474130743983462	-1.79401393474287	0.0728109447079206	0.753773617904001
ENSMUSG00000028125.14	153.623212745363	1.53342079529809	0.501571592484817	3.05723214447099	0.00223391195029608	0.137221444459406
ENSMUSG00000018474.17	1163.60020142756	0.402044459625426	0.412241753428047	0.975263801597427	0.32942942131765	0.844910646516937
ENSMUSG00000070331.14	10.290526133344	-0.272759118564797	1.23356508337085	-0.221114493464304	0.825003285395015	0.963797294144497
ENSMUSG00000075225.14	84.6013427964844	0.0870924747419616	0.585950873552518	0.148634431098183	0.88184210268803	0.976087240515401
ENSMUSG00000028327.14	0.449591429056578	0.237654928581694	4.98502165035908	0.0476738006874202	0.961976214376669	NA
ENSMUSG00000053930.13	37.6088009402278	0.231561016397278	0.743108955595416	0.311611123313322	0.755336079703673	0.947584344774287
ENSMUSG00000026110.15	125.104182791387	-0.887219674557414	0.792451785898317	-1.11958820756731	0.262889283077753	0.836538187133815
ENSMUSG00000035572.16	838.40597016835	-0.455353261517026	0.438883897656566	-1.03752555960335	0.299490990155139	0.840913858011647
ENSMUSG00000070469.12	183.608741433359	-0.664148620513774	0.519618130490314	-1.27814751168725	0.201197419191497	0.827154552458072
ENSMUSG00000026587.15	4097.62786013322	-1.2505071406052	0.404271273355127	-3.09323769217386	0.00197985491155189	0.126136630015525
ENSMUSG00000036054.15	2232.00731799773	0.125223401182305	0.433727150992232	0.288714692856634	0.772799718031117	0.950845111517009
ENSMUSG00000078786.9	122.72848332092	-0.562506088927291	0.540080290271337	-1.04152308288215	0.297632845889849	0.840057923725333
ENSMUSG00000026663.6	1116.30201735967	-0.974160019468251	0.516897559687911	-1.88462878419551	0.0594799733292779	0.726045429428181
ENSMUSG00000031309.15	132.986215326754	-1.11580308447997	0.632100807225453	-1.76522964648262	0.0775251779743731	0.753808470085654
ENSMUSG00000041540.16	429.88521512167	0.103686773779457	0.438674186291547	0.2363639735814	0.813150249146953	0.962747424516786
ENSMUSG00000058248.12	1.11413472890691	-0.432496496569448	3.83434448034412	-0.112795420126319	0.910192749381371	NA
ENSMUSG00000043531.16	2626.42489757216	-0.544916122583388	0.493827779581106	-1.10345376488463	0.269830159373993	0.839290322368936
ENSMUSG00000038122.9	105.1439596705	-1.10690093238428	0.703597954515471	-1.57320089588172	0.11567230795377	0.800319747158545
ENSMUSG00000060212.13	1.08936275885776	3.7342624841843	3.86178782269026	0.966977642387117	0.333555210481769	NA
ENSMUSG00000020576.10	2334.50338964741	-0.302687177570425	0.404044494259075	-0.749143180692224	0.45377091126604	0.871927817221244
ENSMUSG00000026623.16	153.954295659331	-0.89925622903818	0.541068862823466	-1.66199959159649	0.0965128563694592	0.785765953662609
ENSMUSG00000046556.7	1269.43753391414	-0.0320346747889696	0.437743762233145	-0.0731813392966357	0.941661815650594	0.990744912134835
ENSMUSG00000038729.23	5.09703498585991	0.356367341050044	1.67194832487628	0.213144949367029	0.831213905560504	0.965222434229074
ENSMUSG00000110125.1	0	NA	NA	NA	NA	NA
ENSMUSG00000041530.16	2958.58319323982	-0.63888371618871	0.45480727710811	-1.40473503469656	0.160100083644021	0.815951612175072
ENSMUSG00000039501.14	1080.38154832881	0.0747150246371669	0.439436905966471	0.170024464542511	0.864990896843335	0.971935448077324
ENSMUSG00000104476.1	0.469279116525642	2.54180416126131	4.90736535554811	0.517956984471846	0.604488281980679	NA
ENSMUSG00000034653.11	71.7989231268042	-0.944353737496047	0.707129832153324	-1.33547432813057	0.181721151999494	0.821273097410324
ENSMUSG00000049690.15	480.434951924608	-1.00740434130127	0.506960747167783	-1.98714465948161	0.046906368432118	0.685502589946318
ENSMUSG00000040021.13	665.314143047681	-0.621423738732516	0.527298703454279	-1.17850420390119	0.238595657379934	0.832237885230054
ENSMUSG00000032384.16	642.24482710878	-0.732785372026794	0.558380989705347	-1.31233939825473	0.189405644470223	0.825325654482975
ENSMUSG00000020189.14	364.212152968158	-0.677332030200555	0.477588637819603	-1.41823313321034	0.156122711462366	0.815951612175072
ENSMUSG00000040565.8	782.469548616563	-0.933871114971529	0.533437508472612	-1.75066638573181	0.0800033928096293	0.756119255484415
ENSMUSG00000046709.16	389.705316746983	-0.121889249052576	0.470683613429482	-0.258962168163173	0.795664430429994	0.958091213238955
ENSMUSG00000051177.16	173.086160872292	-0.859641531409481	0.604350116250962	-1.4224230430238	0.15490347762169	0.815951612175072
ENSMUSG00000061911.15	1.15973830528623	2.01887808687261	3.87544645620541	0.520940776678764	0.602408028294279	NA
ENSMUSG00000039313.14	2.7314780543728	-0.894099973403069	2.38836233765577	-0.374356922024087	0.708138787936068	NA
ENSMUSG00000046591.10	432.053188426231	-0.485530112135925	0.441767102515951	-1.09906353227919	0.271740355123895	0.839290322368936
ENSMUSG00000051278.12	134.707689464585	-0.828318041925665	0.623894624145088	-1.32765696300188	0.184291457180409	0.822062559319137
ENSMUSG00000038608.15	1126.70660314696	-0.844486717895368	0.502382570823358	-1.68096340705318	0.0927700225177275	0.781245657902783
ENSMUSG00000028114.16	410.606581469653	-0.765701461041437	0.458180264668276	-1.67117949001101	0.0946862301333526	0.781245657902783
ENSMUSG00000002341.8	27415.2743506394	-1.07934974356165	0.417353581075321	-2.5861758290912	0.00970474103389321	0.348506228660569
ENSMUSG00000060862.10	1102.3327588687	0.424074045460819	0.450907364262818	0.9404903957471	0.346966073791911	0.848873089458508
ENSMUSG00000057329.7	325.503835525314	-0.500956001878188	0.502853637172501	-0.996226267140111	0.31914021952276	0.843699396612436
ENSMUSG00000038658.15	1432.52635828426	-0.708251770595805	0.548948511385438	-1.29019708753434	0.19698223712044	0.827154552458072
ENSMUSG00000024713.16	283.587240657524	0.018055216032084	0.470650803109855	0.0383622335557128	0.969398872059582	0.995419884323374
ENSMUSG00000056019.12	0	NA	NA	NA	NA	NA
ENSMUSG00000110333.1	0	NA	NA	NA	NA	NA
ENSMUSG00000015305.6	2547.5480154551	-0.591824594061251	0.456744895095836	-1.29574429931411	0.195063593821495	0.826694534778231
ENSMUSG00000006576.16	1894.05690936204	0.135097238103157	0.458968535436413	0.294349672521012	0.768490719711476	0.949775085441837
ENSMUSG00000066306.13	7563.11853792348	0.209868097218397	0.41808238687511	0.501977848880511	0.61568310272728	0.912147352133814
ENSMUSG00000041313.14	2506.23934288826	-0.43205966763619	0.404508326197533	-1.06811069057007	0.285470584084442	0.839689233901408
ENSMUSG00000095093.2	0	NA	NA	NA	NA	NA
ENSMUSG00000030067.17	96.1270425792464	-0.860634645950833	0.572774716117348	-1.50257094409612	0.13294972074337	0.809315755979747
ENSMUSG00000003279.17	7.01662883375954	-1.17940859734925	1.64541154491686	-0.716786387571412	0.473505912264202	0.874341358146023
ENSMUSG00000045967.11	13.5050548085202	0.136148620315194	1.07224833224987	0.126974895852266	0.898960267909229	0.981019268318913
ENSMUSG00000031214.13	378.019975744217	-0.321920108105473	0.446182397924385	-0.721498897318734	0.470602618852997	0.874341358146023
ENSMUSG00000035967.15	105.586472047402	-0.716077615027002	0.591804235376011	-1.20999068986391	0.226282465396379	0.829231175924863
ENSMUSG00000039057.11	1208.50453619525	0.242907988489584	0.418814406261383	0.579989572607931	0.561921649633337	0.898759984266554
ENSMUSG00000063952.16	487.280683412237	-0.012518619850583	0.458795654727706	-0.0272858291520063	0.978231759360043	0.997308755139044
ENSMUSG00000040896.16	2136.95186732056	-0.758967136491355	0.516415383270069	-1.46968343910553	0.14164751005885	0.813875777415136
ENSMUSG00000087370.3	214.116866895899	-0.771836959508921	0.615525868265605	-1.25394723325562	0.209861185372407	0.829231175924863
ENSMUSG00000059206.4	0	NA	NA	NA	NA	NA
ENSMUSG00000007080.14	2418.55034343482	-0.00626385018918471	0.407505766157226	-0.015371194003591	0.987736044566825	0.998574266457785
ENSMUSG00000053199.13	47.9988852420549	-0.384464287668144	0.719995649791683	-0.53398140360901	0.593354400261425	0.905305978190663
ENSMUSG00000024122.16	1211.95433941318	-0.647023100898157	0.537025858156702	-1.20482671564273	0.228270204271896	0.829231175924863
ENSMUSG00000017639.13	281.76123346039	0.311895733343207	0.530282056608065	0.588169502355481	0.556418525695419	0.89798489258796
ENSMUSG00000042507.15	555.378785674651	-0.754968482268732	0.440083007429628	-1.71551382244509	0.0862510633660135	0.765098718409285
ENSMUSG00000062393.13	59.484318964534	-0.645043041860689	0.714082272238492	-0.903317540482584	0.366357389825593	0.855344219410791
ENSMUSG00000027519.10	2259.91161398011	0.0845862223747618	0.402630121806907	0.210084188423755	0.83360196591892	0.96591715306787
ENSMUSG00000038371.15	2005.88603364708	-0.971801370366523	0.6085777220552	-1.59684019829825	0.110301332857835	0.792299694108692
ENSMUSG00000021047.7	572.210324149488	-0.810159039116475	0.541321126040263	-1.49663295988972	0.134488788978844	0.809895303977135
ENSMUSG00000025085.16	260.829257770019	0.349357232082044	0.574126299235063	0.608502401906184	0.542854313417805	0.891978311797672
ENSMUSG00000078584.9	1846.15421164254	0.117734238155324	0.406842244048275	0.289385480189598	0.772286405028734	0.950784748294978
ENSMUSG00000046785.8	450.371368723296	-0.807104424591959	0.57833057513857	-1.39557626604572	0.162842133667577	0.815951612175072
ENSMUSG00000014164.15	315.99653448462	-0.255431599331626	0.448266781162803	-0.569820495440321	0.568799453041761	0.899933994297425
ENSMUSG00000099083.7	274.46487437933	-1.08787973264172	0.530181583492605	-2.05190026683923	0.0401793559310477	0.662746681372758
ENSMUSG00000058761.5	2801.33996038906	-0.356782620591515	0.452468339063032	-0.788525052007702	0.430389650830658	0.866136429771701
ENSMUSG00000038178.16	1863.25403461486	0.489728756000965	0.450246284286693	1.08769083297783	0.276731615978749	0.839290322368936
ENSMUSG00000040387.16	398.183843162329	0.411011759212427	0.454701141670844	0.90391626839142	0.366039802080644	0.855344219410791
ENSMUSG00000028197.4	0	NA	NA	NA	NA	NA
ENSMUSG00000087141.1	78.6719899945696	-0.672870369179518	0.692053698540488	-0.972280576779769	0.330910983943307	0.844910646516937
ENSMUSG00000043313.6	372.369491119199	-0.15839826634816	0.442762188534258	-0.357750210948522	0.720530253624546	0.939692728728124
ENSMUSG00000013629.16	5787.9766569986	0.171504258160399	0.454961205876157	0.376964576199675	0.706199930326295	0.936785889015291
ENSMUSG00000046924.4	0	NA	NA	NA	NA	NA
ENSMUSG00000000223.13	327.920937567187	0.263377199383425	0.445385243414603	0.591346936787151	0.554287986517421	0.897545524394523
ENSMUSG00000018909.15	1016.4182503501	0.0472595515530646	0.427986502224355	0.110422995368883	0.912073916975308	0.983515942753523
ENSMUSG00000040560.10	1051.46613015593	-0.570687275792456	0.457891427125818	-1.24633754201221	0.212640500691576	0.829231175924863
ENSMUSG00000051003.2	0	NA	NA	NA	NA	NA
ENSMUSG00000084989.3	5.34022244588646	-2.17174095538413	1.84060236540019	-1.17990772814852	0.238036915844761	0.832237885230054
ENSMUSG00000019943.10	1411.54976651091	-0.818233709428866	0.524753049553593	-1.55927385295795	0.118931577544653	0.801092188412074
ENSMUSG00000035666.14	3498.02688229667	-0.577939655369427	0.500278763850602	-1.15523523509388	0.247994109382949	0.833143835152256
ENSMUSG00000031822.20	890.966389285745	0.162350798403053	0.438971801629943	0.369843342556923	0.711499218715636	0.937758487298975
ENSMUSG00000028556.15	2893.56434946417	-0.46786334315535	0.463932002215206	-1.00847395937631	0.313226982906419	0.843699396612436
ENSMUSG00000052625.8	0	NA	NA	NA	NA	NA
ENSMUSG00000000197.8	30.9004043502291	-0.462134691503215	0.808069829385993	-0.571899450638277	0.567390096241359	0.89971785582231
ENSMUSG00000032548.14	4.38060234208376	1.57710036753211	1.81782212643232	0.867576835268994	0.385626032269093	NA
ENSMUSG00000024018.18	612.857091887351	-0.262550369164698	0.426237844692229	-0.615971510822265	0.53791332274333	0.890797877664229
ENSMUSG00000034940.15	1101.38145808912	-0.5283303331484	0.438776590362213	-1.20409872530406	0.228551422565092	0.829231175924863
ENSMUSG00000047619.5	0	NA	NA	NA	NA	NA
ENSMUSG00000041417.15	3685.12759772642	-0.84314930284885	0.536699595566123	-1.57098926441239	0.116185142473915	0.800742247513048
ENSMUSG00000054580.14	1.75899034128818	-1.42061615248248	3.21289440299576	-0.442160860051259	0.658372806707174	NA
ENSMUSG00000033364.13	644.373493175718	-0.852862406943372	0.585392513695671	-1.45690692482403	0.145142074269511	0.815951612175072
ENSMUSG00000052353.13	559.027044218684	0.822133340645985	0.425721766035437	1.93115176680337	0.0534642867911699	0.706581627778029
ENSMUSG00000015533.9	30.0017558027566	-0.775136986455895	0.84707403139807	-0.91507584664891	0.3601518138829	0.854768285047103
ENSMUSG00000027365.14	435.80471802369	-1.03899079380688	0.479543268212082	-2.16662575137511	0.0302634022102883	0.596048252496676
ENSMUSG00000028364.15	35023.6238051043	-0.0561277673583382	0.397725410000289	-0.141121904578079	0.887773639470793	0.977492106215898
ENSMUSG00000054387.13	662.426293806514	-0.985268957114143	0.528155410241563	-1.86549060751552	0.0621126675198208	0.733566015165419
ENSMUSG00000029547.10	3851.75757020725	0.264562861900088	0.492401088659503	0.537291382966528	0.591066356724091	0.905193920174526
ENSMUSG00000020349.4	14915.615350954	-0.0196611209531259	0.399399488713986	-0.0492267053631743	0.960738629258848	0.993731584781105
ENSMUSG00000042446.16	911.95632556774	-0.919038797478466	0.498554373796213	-1.84340735089835	0.0652695576232312	0.742913389504527
ENSMUSG00000038369.14	310.639287810947	-0.377845866111663	0.449143037941461	-0.841259541377796	0.400202550906144	0.858787238914039
ENSMUSG00000032913.13	327.574312228163	-0.584355440920435	0.479730057105184	-1.21809220053167	0.223188937435629	0.829231175924863
ENSMUSG00000047414.6	101.80468140673	-1.82103924582058	0.621404327876482	-2.93052230911169	0.0033839269489046	0.175738606213112
ENSMUSG00000049149.9	0	NA	NA	NA	NA	NA
ENSMUSG00000008496.19	9.14137557164796	-1.20774597622624	1.33148451282913	-0.907067235547513	0.364371243120491	0.855344219410791
ENSMUSG00000048612.16	41.2700575456852	1.81674883944901	0.740953669636302	2.4519061230114	0.0142101729503686	0.42988884312431
ENSMUSG00000022973.18	161.043112648488	-0.975913246288789	0.503140864134555	-1.93964218741692	0.0524231900603243	0.701835890634069
ENSMUSG00000038127.14	750.723695565795	-0.799571957224627	0.628668300783901	-1.27185028452623	0.203426318743678	0.828656558037319
ENSMUSG00000050030.5	0	NA	NA	NA	NA	NA
ENSMUSG00000038648.5	1264.37282220771	-0.416747550728909	0.411401736122013	-1.01299414693114	0.31106295665898	0.843165818230377
ENSMUSG00000024565.9	4592.36898780602	-0.290040962980088	0.402342597493507	-0.720880574880638	0.470982995290686	0.874341358146023
ENSMUSG00000021719.9	128.649310544816	0.540837589611713	0.558666240600104	0.968087115897249	0.333000863917562	0.845232338610262
ENSMUSG00000026648.18	136.779430158973	-0.875762145468645	0.568720050276595	-1.53988266290721	0.123588957519592	0.80257775634329
ENSMUSG00000070817.3	0	NA	NA	NA	NA	NA
ENSMUSG00000038733.14	2009.80031071261	-0.82938272806248	0.482485794959999	-1.71897854139155	0.0856182793267628	0.764347419411253
ENSMUSG00000058254.12	6099.62713726728	-0.565123357246076	0.410836426226819	-1.37554345518057	0.168963023207925	0.819808983974546
ENSMUSG00000033066.15	4576.26773282896	0.025418733848577	0.447250475838183	0.0568333299163971	0.954677963402973	0.9931471512401
ENSMUSG00000039728.15	0	NA	NA	NA	NA	NA
ENSMUSG00000052496.5	2.44280215017756	-3.07641896781446	2.67910278441591	-1.14830195605399	0.250843931906204	NA
ENSMUSG00000026374.14	5130.52056806134	-0.247947344126527	0.42924763637265	-0.577632404040245	0.563512324789464	0.899235045288444
ENSMUSG00000021277.16	2803.7258979621	-0.0669258966442387	0.528213881591248	-0.126702267730306	0.89917605091662	0.981072530917393
ENSMUSG00000040140.15	3.94022598911667	0.203697390365449	2.09848524195206	0.097068774320264	0.922671778212645	NA
ENSMUSG00000062202.14	1326.66667029565	0.324087796005219	0.441251025655144	0.734474884277112	0.462659361910148	0.874282091470289
ENSMUSG00000046324.12	1642.15378370899	-1.2765879001974	0.537471451741538	-2.3751734088591	0.0175407073726177	0.484757091026274
ENSMUSG00000040310.12	81.2995558730844	1.2264075379827	0.615404190018899	1.99284885912955	0.0462779997470632	0.684307471669689
ENSMUSG00000097789.2	231.611612301959	1.21027026888799	0.467801090128024	2.58714717521666	0.00967742475351278	0.348427952575004
ENSMUSG00000032386.15	670.154423480012	-0.760514305743592	0.551724784240269	-1.37843056441778	0.168070392135647	0.819589436137345
ENSMUSG00000058997.8	877.896434984744	-0.360390847511253	0.418423368204589	-0.861306692926001	0.389069150448109	0.858285420121816
ENSMUSG00000027087.11	3454.04955055021	-0.759437261816991	0.475593970772213	-1.59681852270731	0.110306165838682	0.792299694108692
ENSMUSG00000038453.16	17.1144073701406	-0.252343185657545	0.977575561551783	-0.258131642792891	0.796305311464537	0.958091213238955
ENSMUSG00000000804.14	283.556813024048	-1.0153309952816	0.597091840862497	-1.7004603409334	0.0890443701126768	0.773071132214313
ENSMUSG00000091450.2	0	NA	NA	NA	NA	NA
ENSMUSG00000039318.12	2127.83481038613	-0.0999286879200748	0.41812915029336	-0.23899000548028	0.811113332689812	0.96189372389144
ENSMUSG00000024054.14	1058.06029899968	-0.919426532591779	0.530543322187868	-1.73299049133297	0.0830973588733051	0.759937319301336
ENSMUSG00000020053.18	4.93115031062912	-0.546447914859517	1.71323951546019	-0.318955936941915	0.749759926178798	NA
ENSMUSG00000039782.14	154.361631051985	0.0410660455024069	0.51231830638927	0.0801572869644914	0.936112160867024	0.989328202973432
ENSMUSG00000030516.14	2327.73072230842	-1.07908646190098	0.477169593175044	-2.26143173692364	0.0237325353479863	0.550301325929527
ENSMUSG00000024887.10	61.864199442414	-0.134443645564544	0.623780531042695	-0.21553036504652	0.829353840429548	0.965039044217913
ENSMUSG00000075097.3	0	NA	NA	NA	NA	NA
ENSMUSG00000064043.13	148.849425193948	-0.319244348822228	0.544205583364561	-0.586624537823544	0.557455899058532	0.89798489258796
ENSMUSG00000039735.15	230.245144487677	-0.912111705877663	0.564321319598299	-1.61629850618958	0.106029789655576	0.791186343380353
ENSMUSG00000050812.18	917.152211265832	-1.03408433361735	0.52761953954762	-1.95990530317352	0.0500068596675918	0.693941344925658
ENSMUSG00000109674.1	1.59262892152205	-4.00241439526816	3.37219818426832	-1.18688587578864	0.235272639268077	NA
ENSMUSG00000039697.16	50.0191300674422	-0.687828867889151	0.794255666426772	-0.866004357241267	0.386487772327234	0.858285420121816
ENSMUSG00000020627.10	35.5290738740032	0.458238512006105	0.743479351511932	0.616343293292861	0.53766797106612	0.890797877664229
ENSMUSG00000072663.12	1.59262892152205	-4.00241439526816	3.37219818426832	-1.18688587578864	0.235272639268077	NA
ENSMUSG00000027035.10	208.437571548948	-1.12537094095069	0.617081628952107	-1.82369866181519	0.0681976412835122	0.744943145665173
ENSMUSG00000030091.17	12895.9890645505	0.0315866231509199	0.46091864626404	0.0685297143149756	0.945363967066595	0.991654282506262
ENSMUSG00000032818.16	0	NA	NA	NA	NA	NA
ENSMUSG00000021339.4	1743.19096340951	-0.840212691067654	0.566771877097811	-1.48245303801948	0.138219790478011	0.811315518289242
ENSMUSG00000044864.16	1917.93207645688	-0.0740393707265008	0.42915760371314	-0.172522565337071	0.863026722751446	0.971793952082373
ENSMUSG00000054455.4	4326.0825273076	0.202283678348181	0.414953213100364	0.48748550911752	0.625914309515895	0.915369405105348
ENSMUSG00000047031.5	0	NA	NA	NA	NA	NA
ENSMUSG00000054666.7	0	NA	NA	NA	NA	NA
ENSMUSG00000046574.8	362.594458706793	-0.27822078621388	0.469001056556888	-0.593219956168975	0.553033958877476	0.896913003991245
ENSMUSG00000003316.14	5603.04958762587	-0.791028235524314	0.430333583600973	-1.83817453637966	0.0660366906964012	0.743306148851448
ENSMUSG00000039115.13	344.786982602923	-0.239924065416394	0.460455317864131	-0.521058300573673	0.60232615850405	0.90645115072378
ENSMUSG00000038485.5	1868.21958336717	0.146288249480102	0.40368018660079	0.362386498856755	0.717063227215226	0.938979261404335
ENSMUSG00000038013.14	366.448462043275	-0.58945692333519	0.44191256142508	-1.33387682267802	0.182244228582767	0.821273097410324
ENSMUSG00000021994.15	3290.741503485	-0.339473030740407	0.535468121163112	-0.633974306449886	0.526097590221709	0.888394157441629
ENSMUSG00000020260.9	6706.51226290538	0.376394845250771	0.439924462579472	0.855589714297316	0.392224761277494	0.858285420121816
ENSMUSG00000091243.2	18.6100537914284	-0.35251182583614	1.04007419557757	-0.338929498813673	0.734662841459062	0.943190634274133
ENSMUSG00000033282.14	105.469467441139	-0.577218624614098	0.614736667150518	-0.938968920285287	0.347746701665943	0.848881272055349
ENSMUSG00000022840.9	187.658371401415	1.04581940071327	0.568540244055085	1.8394817458374	0.0658443603765249	0.743306148851448
ENSMUSG00000029249.15	916.576801686737	-0.555471202890055	0.569767239712366	-0.974908987695522	0.329605407475017	0.844910646516937
ENSMUSG00000107320.1	0.91887054558222	1.69604309114613	4.221534072655	0.401759896273786	0.6878607390934	NA
ENSMUSG00000021244.15	305.530912552994	-0.761891913795199	0.47352764139731	-1.60897030540175	0.107622834836254	0.791186343380353
ENSMUSG00000079509.10	723.415077001022	0.155166730456659	0.42026500467501	0.369211637254091	0.711969982449956	0.937936422788874
ENSMUSG00000040782.12	1311.45692180892	-0.678644477553099	0.542028381607014	-1.2520460193266	0.210553095678405	0.829231175924863
ENSMUSG00000094858.3	0	NA	NA	NA	NA	NA
ENSMUSG00000004221.16	1426.62117003064	-0.101167053018088	0.432030028017862	-0.234166716332748	0.814855553231395	0.962747894970423
ENSMUSG00000033105.12	3026.17381256295	0.0839420590938595	0.406250877634438	0.206626160619385	0.836301827915115	0.96665142825988
ENSMUSG00000024085.13	406.026323907096	-0.420554660410342	0.492163862514276	-0.854501300160256	0.392827289327337	0.858285420121816
ENSMUSG00000022376.8	496.140118725174	-0.517720926579488	0.429321250316657	-1.2059056620133	0.227853867239671	0.829231175924863
ENSMUSG00000031729.6	3921.18179483925	0.0656627160405673	0.406080400837489	0.161698806209673	0.871543044676374	0.973886985698879
ENSMUSG00000017756.9	552.177752608713	0.0439536620868604	0.444566125371195	0.0988686712244681	0.921242543741357	0.986150715886986
ENSMUSG00000025786.16	7648.92517493163	0.00658404449654483	0.397408797334633	0.0165674351969637	0.98678170393979	0.998386219000017
ENSMUSG00000039976.4	2565.37725041341	0.537749361213085	0.448504655088369	1.1989827867163	0.23053463885714	0.829231175924863
ENSMUSG00000092341.3	30653.2772113582	-1.29574340598715	0.449669462677797	-2.88154636579268	0.00395729007431696	0.189972093259507
ENSMUSG00000091924.2	0	NA	NA	NA	NA	NA
ENSMUSG00000017418.13	267.044576292012	-0.678568759014389	0.562239091791443	-1.20690426710154	0.227469014182999	0.829231175924863
ENSMUSG00000042548.14	1886.47505105977	-0.135871934513489	0.407520275760558	-0.333411470778749	0.738823705608904	0.945183443142132
ENSMUSG00000067851.11	202.982192690206	-0.685168801139687	0.551693897273579	-1.24193652408651	0.214259982897094	0.829231175924863
ENSMUSG00000021754.17	953.847596811995	-0.733721832898095	0.467459458510256	-1.56959458096407	0.116509460032431	0.800742247513048
ENSMUSG00000052920.15	78.4365295392894	-1.45750331228695	0.599300977911839	-2.43200556315688	0.0150154766853379	0.446208977005404
ENSMUSG00000022358.7	205.642244429834	-0.382231879262349	0.548720186648438	-0.69658796698734	0.486060688464789	0.876965823405363
ENSMUSG00000033991.9	297.103112531552	-0.361568981191732	0.585443311267669	-0.617598620110326	0.536839954421841	0.890797877664229
ENSMUSG00000054720.12	747.892361626985	-0.485934545642295	0.446238519601035	-1.08895696874566	0.276172862125773	0.839290322368936
ENSMUSG00000028033.16	207.25373520134	-0.799171088113711	0.502856138480239	-1.58926386089074	0.112000834118768	0.796524853016085
ENSMUSG00000021945.9	550.786616700771	-0.649015848175294	0.520377701200166	-1.24720149744781	0.21232362399284	0.829231175924863
ENSMUSG00000055675.6	2258.19108644604	-0.213004903492269	0.406586696160685	-0.523885571032283	0.600358131170904	0.906194966708381
ENSMUSG00000025234.11	986.886673076039	-0.614571979544105	0.519384307854898	-1.18327021099721	0.2367020747807	0.832237885230054
ENSMUSG00000091415.5	8.27911552446528	-1.45010987728856	1.49112330559587	-0.972494945150812	0.330804378394432	0.844910646516937
ENSMUSG00000057335.11	664.894471228854	-0.890713130019898	0.512213559714707	-1.7389487512123	0.0820437778765906	0.75865648094195
ENSMUSG00000029420.12	114.436126624258	0.971369427415204	0.529884255416746	1.83317284385292	0.0667768709989755	0.743306148851448
ENSMUSG00000042717.5	0	NA	NA	NA	NA	NA
ENSMUSG00000062232.14	1637.10477057675	-0.372309843917995	0.540320689053999	-0.689053466691865	0.490789621753056	0.878459248646014
ENSMUSG00000064127.13	972.948871589009	-0.58459829804208	0.566182727268532	-1.03252584348942	0.301825847403792	0.841502226958212
ENSMUSG00000039145.16	157.415024347165	-0.671385837784902	0.625926822352526	-1.07262672537585	0.283438628768829	0.839689233901408
ENSMUSG00000032777.9	11490.5431008667	0.374260721413892	0.446054668234853	0.839046753831617	0.401443073807611	0.859337195039903
ENSMUSG00000029414.11	719.529079091807	-0.65920984258975	0.50917382810463	-1.29466560573944	0.195435609753191	0.826694534778231
ENSMUSG00000104339.1	3.37124938417398	0.197267115691253	2.00458808817819	0.0984078059999513	0.92160847647665	NA
ENSMUSG00000034163.10	241.047528539072	-0.512238374795009	0.477605025462073	-1.07251462502814	0.283488948594736	0.839689233901408
ENSMUSG00000041688.16	371.861138795065	-1.0118586300539	0.579259969695602	-1.74681262816353	0.0806698453517164	0.758380504605115
ENSMUSG00000029190.19	938.410857589688	-0.815177313154495	0.504027754634442	-1.61732623979352	0.105807878108482	0.791186343380353
ENSMUSG00000029406.15	882.510288092009	0.226955838947872	0.458096773188965	0.495432083854153	0.620295151898867	0.914616976340117
ENSMUSG00000033904.16	258.562509142474	-0.820854442883391	0.614126784699402	-1.33662048836573	0.181346547777531	0.821273097410324
ENSMUSG00000026748.13	812.88332480873	-0.691453273573057	0.428100103650417	-1.61516726503223	0.106274477436112	0.791186343380353
ENSMUSG00000020715.9	399.856402920916	-0.595156710607839	0.453251445998972	-1.31308287234717	0.189155024602101	0.825325654482975
ENSMUSG00000042605.16	932.256429364042	-0.278677466936409	0.412890883550089	-0.67494216520429	0.49971251009423	0.882130073703186
ENSMUSG00000031398.13	1543.02699587398	0.121606285287663	0.457228488986715	0.265963928794464	0.790266989412212	0.955793624879781
ENSMUSG00000024169.16	2288.12981021978	0.207163203463879	0.443813766356894	0.466779580012595	0.64065758688318	0.920424919047206
ENSMUSG00000033902.12	1558.34940170995	0.368157976255637	0.435888943643952	0.84461416519975	0.398326297570392	0.858285420121816
ENSMUSG00000040363.15	665.888488704153	-0.2333700095026	0.436770660218715	-0.534307889146535	0.593128534907009	0.905305978190663
ENSMUSG00000079487.11	1303.55972584104	-0.144162047690269	0.408512876871876	-0.35289474543414	0.724167350268005	0.940906428795587
ENSMUSG00000049908.6	0.234639558262821	1.6664677880616	4.98744180465523	0.334132778553152	0.738279366382608	NA
ENSMUSG00000020949.9	1078.53655318801	-0.293906305105948	0.480908908225916	-0.611147558464189	0.541101897317062	0.891819484268302
ENSMUSG00000041886.7	0.429903741587514	-2.1196455349258	4.8955512206099	-0.432973824480122	0.665033786086064	NA
ENSMUSG00000061798.2	0	NA	NA	NA	NA	NA
ENSMUSG00000032101.6	857.873163339958	-0.380191535013462	0.422951171435456	-0.898901718898491	0.368705012335783	0.855344219410791
ENSMUSG00000048814.10	707.623670385131	-0.173617419350125	0.441886303908236	-0.392900657509808	0.694392855928711	0.933764396033606
ENSMUSG00000034329.16	161.725495714031	-0.898408759419376	0.576575796397727	-1.55817980052643	0.119190631915761	0.801214862689238
ENSMUSG00000007827.10	101.763420481442	-0.098533113480001	0.600221378340058	-0.164161286211596	0.869604176721367	0.973624902374782
ENSMUSG00000019828.13	11.8731001061348	0.861693135145728	1.1569453373169	0.744800214281599	0.456392505347841	0.872327789040694
ENSMUSG00000051335.6	184.112297782749	0.0641983138898465	0.498470926389687	0.128790488052775	0.897523432279011	0.980807863042139
ENSMUSG00000078817.4	0.214951870793757	-1.14900650751966	4.9950726440521	-0.23002798745837	0.818070021930774	NA
ENSMUSG00000009112.4	4175.12416104202	-0.5511412294502	0.398613123246626	-1.38264697599834	0.166773137645791	0.818721865646966
ENSMUSG00000036555.14	1360.2892867455	0.136927773672238	0.430896127525046	0.317774435474077	0.750656043853899	0.946649347559569
ENSMUSG00000067780.3	1.57796795052776	-3.98982426847974	3.3371911225918	-1.19556361080725	0.231866899008714	NA
ENSMUSG00000091151.2	0	NA	NA	NA	NA	NA
ENSMUSG00000036377.18	947.02892071553	-1.2859569100663	0.529852813536243	-2.42700779766329	0.0152239286406897	0.44829499835763
ENSMUSG00000022255.16	2310.78808617448	-0.796887003727377	0.502903469960901	-1.58457249020241	0.11306349942193	0.79755514569615
ENSMUSG00000021294.7	71.2557399008376	0.732829138908059	0.643023811309022	1.13966096747835	0.254427574652711	0.83506523083802
ENSMUSG00000103345.1	0.229612841788049	-1.19704868042682	4.99171724895189	-0.239806988402271	0.810479889073532	NA
ENSMUSG00000045005.9	639.744778509245	-1.10001040510904	0.523283829561463	-2.10212955754987	0.035541928324443	0.628643147532732
ENSMUSG00000035045.17	87.6527044935008	-0.56402993787544	0.631119633322518	-0.893697340559847	0.371483848687193	0.855344219410791
ENSMUSG00000045374.18	914.634992719104	0.522104670269382	0.497334823945718	1.04980517174958	0.293807696984565	0.839689233901408
ENSMUSG00000030123.15	1602.69913953087	0.601502537177146	0.489202098343264	1.22955837518727	0.218862525383006	0.829231175924863
ENSMUSG00000033565.18	2280.23333157814	-0.0029675124661145	0.410711648032263	-0.00722529414573942	0.994235099513218	0.999558999874052
ENSMUSG00000078185.3	86.7846782895011	-1.49618256318987	0.700146300843456	-2.13695703510458	0.0326014863407436	0.61086338005695
ENSMUSG00000026980.15	15.0563741576761	0.520118844747365	1.2086009615872	0.43034786606848	0.666942612880353	0.927538951516959
ENSMUSG00000068647.2	0	NA	NA	NA	NA	NA
ENSMUSG00000042251.12	3.27490038272995	2.6428071182371	2.57796617088571	1.02515197758748	0.305291483323395	NA
ENSMUSG00000031731.16	1456.24306222507	-0.772675468450684	0.459055735582052	-1.68318443395764	0.0923393932191799	0.781245657902783
ENSMUSG00000037989.15	405.798358943498	0.125696825925704	0.477174517092361	0.263418982831755	0.792227660938582	0.956858665772702
ENSMUSG00000029648.13	105.384972934755	-1.58713069167451	0.591829684064134	-2.6817355303566	0.00732413363624037	0.290942750770307
ENSMUSG00000022206.7	5.59957640809312	-1.23128922588693	1.79705528272941	-0.685170477347153	0.493236351146649	0.879755178291659
ENSMUSG00000046658.16	1324.41228716244	0.548704054677937	0.499111210099806	1.09936231359783	0.271610062085763	0.839290322368936
ENSMUSG00000024511.15	4.56377325063244	-1.12494937721797	1.95899732348722	-0.574247531495062	0.565800308966612	NA
ENSMUSG00000035270.15	4.03082353365486	-2.17899614187028	2.05993964675895	-1.05779610839504	0.290148407396491	NA
ENSMUSG00000031870.16	0	NA	NA	NA	NA	NA
ENSMUSG00000024393.14	6550.95885909041	0.259316447761216	0.480482021283008	0.53970062619362	0.589403508072678	0.904432005282165
ENSMUSG00000039286.12	974.21316885516	-0.760404830887901	0.530870279271938	-1.43237408568202	0.152036790836752	0.815951612175072
ENSMUSG00000032087.10	28.8034308853174	-0.907719885417652	0.869421444696229	-1.04405049007597	0.296462030427666	0.839974355971123
ENSMUSG00000028082.13	2038.24774954156	-0.986023041913542	0.491500088929188	-2.00615028180718	0.0448402165515601	0.675667634586885
ENSMUSG00000022449.14	38.870343629675	-0.591540274081838	0.733111446871583	-0.806889970967069	0.419729877378851	0.862789094918836
ENSMUSG00000109449.3	0	NA	NA	NA	NA	NA
ENSMUSG00000048620.6	0	NA	NA	NA	NA	NA
ENSMUSG00000041840.8	562.401928323711	-0.343014581482775	0.463592069754488	-0.739906059360399	0.45935699747752	0.872758554906124
ENSMUSG00000040852.6	556.924043799634	-0.365961622630629	0.550897830828344	-0.664300351446945	0.506498096151615	0.88395960895225
ENSMUSG00000104369.1	9.15095226006217	-0.622082217766309	1.28410466980201	-0.484448217030644	0.628067806048321	0.91703834977411
ENSMUSG00000032198.9	396.846339641168	0.246653173299423	0.510035453310765	0.483600055051736	0.628669735695111	0.917393673904297
ENSMUSG00000026452.15	6.65908291432164	0.782445794882415	1.46173646471034	0.535285130919592	0.59245270660576	0.905305978190663
ENSMUSG00000039202.12	5766.55169288455	-0.571625970785161	0.439188718421184	-1.30154975938378	0.193070343917947	0.826044124002817
ENSMUSG00000048379.9	274.878495120886	-0.787501869860213	0.522177768198542	-1.50811068149648	0.131526201873113	0.807483890983587
ENSMUSG00000038677.14	60.7595918078465	-0.149147835477951	0.61641132428241	-0.241961543538448	0.808809961728892	0.96189372389144
ENSMUSG00000052534.15	955.908789124608	-0.859628539459529	0.513673285789473	-1.67349278858906	0.0942303250180481	0.781245657902783
ENSMUSG00000021838.17	614.000464290597	0.034644643674163	0.450990146931503	0.0768190700171213	0.938767479885681	0.989823863066371
ENSMUSG00000003131.7	4153.72557001494	-0.297723404613879	0.502091368741382	-0.592966585663874	0.553203514613035	0.896913003991245
ENSMUSG00000110737.1	0	NA	NA	NA	NA	NA
ENSMUSG00000034621.14	1222.95075110235	-0.612313507362035	0.451804444893771	-1.35526224737785	0.175334018603013	0.820335994164243
ENSMUSG00000055067.15	414.755529678295	0.00615723932340287	0.436169315528392	0.0141166265122152	0.988736935738826	0.998642951714522
ENSMUSG00000026383.14	1004.07109500011	-0.553031585207042	0.462512537928953	-1.19571155342819	0.231809141201154	0.830182494193876
ENSMUSG00000025900.12	0.214951870793757	-1.14900650751966	4.9950726440521	-0.23002798745837	0.818070021930774	NA
ENSMUSG00000074221.12	552.772526051825	-0.512985822615145	0.530749065871944	-0.96653174843065	0.333778168274714	0.845232338610262
ENSMUSG00000021375.10	2522.77620447495	-0.350029296726212	0.442843460510336	-0.790413154848976	0.429286522151867	0.86510486140734
ENSMUSG00000095115.2	243.19428511692	0.31595821637719	0.521820791369958	0.605491811753401	0.54485226368493	0.89252514121059
ENSMUSG00000026594.14	1712.3987260903	-0.688484470770036	0.507467291154688	-1.35670708786661	0.174874299472598	0.820335994164243
ENSMUSG00000040836.15	758.595445643448	-0.625546545049897	0.439576935914651	-1.42306498348984	0.154717318096455	0.815951612175072
ENSMUSG00000063531.7	13.5158072783958	-0.778766139506065	1.35964738186807	-0.572770668256714	0.566799981667782	0.899493471204364
ENSMUSG00000100826.6	24.3577693312201	-0.3186377138939	0.948047093747053	-0.336099035581154	0.736796185660162	0.944201811336036
ENSMUSG00000070576.4	580.9407849363	0.809689584014732	0.486626089272171	1.66388445228195	0.0961355226419444	0.785527800207887
ENSMUSG00000027824.5	25.4916413416709	-0.0393272287603357	1.13258632842458	-0.0347233829098394	0.972300315302351	0.996127991950056
ENSMUSG00000026317.7	2661.34772259084	-0.0361309604696279	0.408179671911237	-0.0885172950932377	0.929465538797753	0.988493534874792
ENSMUSG00000019647.16	1701.5626590257	-0.899559522946874	0.415733199082671	-2.16379044284118	0.0304804359602831	0.596317022245812
ENSMUSG00000026764.15	140.564103248523	-0.852331844221896	0.631390228563974	-1.34992878518318	0.177038827311454	0.820335994164243
ENSMUSG00000013236.17	29419.7819454032	-0.0853495686108552	0.459615701689833	-0.185697678075525	0.852681849279389	0.969694848189173
ENSMUSG00000028382.15	539.687889835272	-0.458716268710662	0.488126102715669	-0.939749515870208	0.347346059781197	0.848873089458508
ENSMUSG00000021738.5	340.494793108843	-0.737518983307747	0.546260836589483	-1.35012238459627	0.176976729220189	0.820335994164243
ENSMUSG00000057751.14	5547.88868938397	0.196209999702741	0.493992188238336	0.397192515133611	0.691225501264548	0.93289116734077
ENSMUSG00000048756.11	4202.91430437435	-0.426540631302866	0.413324767608825	-1.03197452640087	0.302084051036576	0.841502226958212
ENSMUSG00000037259.15	54.7766779142745	-1.61727177565552	0.74136010129019	-2.18149287079381	0.0291469811949362	0.588363914863154
ENSMUSG00000024219.16	2152.39217932275	0.663197685582653	0.482482258147117	1.37455351856779	0.169269907392258	0.820171804605177
ENSMUSG00000036046.14	7622.86247485763	0.238547605784408	0.408094628367115	0.584539930699149	0.558857108372962	0.89798489258796
ENSMUSG00000057359.7	47.7578527560654	-0.261679562159196	0.688288983647357	-0.380188508571665	0.703805488788922	0.936126360581779
ENSMUSG00000042331.13	4372.10190567233	-0.325710831058671	0.411095587205236	-0.792299506966155	0.428186059110409	0.864978093987591
ENSMUSG00000020952.10	395.437845601492	-0.537328922641274	0.60856901096134	-0.882938356970347	0.377269577976672	0.857285339083029
ENSMUSG00000092048.3	0	NA	NA	NA	NA	NA
ENSMUSG00000049164.7	53.8935960202057	-0.897387402859043	0.718423372236207	-1.24910663758862	0.211626073227302	0.829231175924863
ENSMUSG00000046932.2	0	NA	NA	NA	NA	NA
ENSMUSG00000039458.15	1255.2375766862	-0.378925661713391	0.477640385542277	-0.793328355773743	0.427586540234701	0.864823434411483
ENSMUSG00000009681.10	2450.94354191527	0.402790148998949	0.422718179557053	0.95285740826433	0.34066232253159	0.847340974237845
ENSMUSG00000079469.10	228.316062484116	-0.636900302225899	0.472794787921796	-1.34709670769731	0.177949088357812	0.821273097410324
ENSMUSG00000068747.14	5248.48309043775	-0.317155397841561	0.405451653526084	-0.78222741252468	0.434080937097032	0.867858037793856
ENSMUSG00000106320.1	7.40321683668994	-0.287114616759858	1.43439259338651	-0.200164597951526	0.84135185358844	0.967852138608692
ENSMUSG00000036647.5	0	NA	NA	NA	NA	NA
ENSMUSG00000025860.15	306.334033943036	-1.01289851961813	0.539679250903002	-1.87685281196808	0.0605382698508621	0.727484095118026
ENSMUSG00000029231.15	144.488337911464	0.247012499187349	0.582241603945134	0.42424398654038	0.671387884755349	0.929038811675851
ENSMUSG00000027544.16	28.0337377458964	-1.40249841971523	0.840424250205092	-1.66879813305361	0.0951573928519471	0.781245657902783
ENSMUSG00000055541.17	8.97046417994239	-2.10547211341243	1.495687076226	-1.4076955981495	0.159221225825283	0.815951612175072
ENSMUSG00000024107.7	0.91887054558222	1.69604309114613	4.221534072655	0.401759896273786	0.6878607390934	NA
ENSMUSG00000078942.10	0	NA	NA	NA	NA	NA
ENSMUSG00000055415.7	15.1233451668079	-0.816901246661402	1.06411199039463	-0.76768352770694	0.44267522473427	0.869684944092614
ENSMUSG00000033386.10	40.9918315809279	0.353037046473963	0.755599860701605	0.467227516619912	0.640337108699428	0.920424919047206
ENSMUSG00000060487.7	34.4867945192056	0.437050889604264	0.763162525629308	0.572683897501217	0.566858742177364	0.899493471204364
ENSMUSG00000045589.7	164.222780703826	-0.633958294238513	0.703616904810046	-0.900999236807225	0.367588725470503	0.855344219410791
ENSMUSG00000034460.9	75.4076247297917	-0.41247033099196	0.710812106492112	-0.580280396499602	0.561725545022505	0.898713353506773
ENSMUSG00000035378.17	685.071498890648	0.440796196758337	0.427229920986454	1.03175403946559	0.302187354937762	0.841502226958212
ENSMUSG00000046572.10	1159.85621059477	-0.543618921616993	0.523993091758783	-1.0374543675611	0.299524151901086	0.840913858011647
ENSMUSG00000021363.14	0.229612841788049	-1.19704868042682	4.99171724895189	-0.239806988402271	0.810479889073532	NA
ENSMUSG00000000568.15	1239.6348537929	-0.86154826380452	0.41308705089244	-2.08563367441128	0.0370118185927101	0.638780007091506
ENSMUSG00000009376.15	14.2956882302332	-0.0708500474953453	1.06595509262829	-0.0664662592123396	0.947006619534417	0.992296536879148
ENSMUSG00000061589.14	866.228696629385	-0.261109739725717	0.454235728903979	-0.574833116619308	0.565404167294339	0.899493471204364
ENSMUSG00000058325.6	4110.99610207154	-0.563840805149485	0.479869050596341	-1.17498889425936	0.23999915895352	0.832237885230054
ENSMUSG00000033788.15	252.22644308592	0.393304317359399	0.492920445486936	0.797906276682984	0.424924880695808	0.863871498569402
ENSMUSG00000075703.15	1177.39369157171	-0.603332057282412	0.543801662198475	-1.10947078543907	0.267227140661595	0.839290322368936
ENSMUSG00000035293.13	290.423197940453	-0.65323102531758	0.467934106411752	-1.39598934201812	0.162717704656059	0.815951612175072
ENSMUSG00000021770.11	1283.58353181037	-1.03250235917243	0.505141499854624	-2.04398640671885	0.0409548900470393	0.668104826707477
ENSMUSG00000043683.4	4738.79053558477	0.372394591899147	0.441089842505831	0.844260184690659	0.398524029738209	0.858285420121816
ENSMUSG00000028282.12	134.093813139165	-0.871833945807912	0.660061075960123	-1.32083829445593	0.186555288022509	0.82505459371529
ENSMUSG00000035093.16	729.920259762554	-1.01685212162407	0.543836694337588	-1.86977475446491	0.0615151035339341	0.732115169697613
ENSMUSG00000066748.4	0	NA	NA	NA	NA	NA
ENSMUSG00000075327.10	719.641326852578	-0.316314729604027	0.474994405444309	-0.665933589908594	0.505453549334948	0.88395960895225
ENSMUSG00000037605.16	2180.33257559387	-0.767493274666305	0.457294464739289	-1.67833493262129	0.093281732179687	0.781245657902783
ENSMUSG00000036894.3	2820.57766313031	-0.519226118658026	0.429205569484152	-1.20973760727771	0.226379594288646	0.829231175924863
ENSMUSG00000023088.17	1768.92353163939	0.0108780792599941	0.429310145817906	0.0253385096205206	0.979784957547719	0.997478591092599
ENSMUSG00000020646.17	4028.51881413477	-0.614760272548333	0.434750408619033	-1.4140533519016	0.157346238208781	0.815951612175072
ENSMUSG00000060724.2	0	NA	NA	NA	NA	NA
ENSMUSG00000020668.10	5197.08336472037	0.551316539226874	0.430491542520156	1.28066752716997	0.200310470318827	0.827154552458072
ENSMUSG00000031835.16	11879.9819962484	-0.0260548262729764	0.40111175927222	-0.0649565256332809	0.948208614631091	0.992296536879148
ENSMUSG00000043154.15	360.492932796746	-1.59056037580784	0.643431578638689	-2.47199613542903	0.0134360968783848	0.414188150231613
ENSMUSG00000032244.9	3347.29416310224	-0.698547084749829	0.569600644530442	-1.2263804324268	0.220055546077438	0.829231175924863
ENSMUSG00000033960.6	578.434803217329	-0.0788092652458678	0.484022059942543	-0.162821639276572	0.870658869947053	0.973858745321563
ENSMUSG00000050244.9	2019.08245840117	-0.60498237428499	0.478751565469121	-1.2636666236113	0.206349709580237	0.828656558037319
ENSMUSG00000046707.9	2073.75091939912	-0.388927069670703	0.427256240993709	-0.910289967365111	0.362669608106164	0.854822373161201
ENSMUSG00000091541.2	0	NA	NA	NA	NA	NA
ENSMUSG00000037370.13	74.6844038959504	-0.837411307614307	0.639821468698613	-1.3088202703132	0.190595238957043	0.825325654482975
ENSMUSG00000041977.18	1835.66973975617	-0.385008634099059	0.404215974500294	-0.95248248062195	0.340852346780334	0.847340974237845
ENSMUSG00000040177.10	317.997430834553	-0.220534621529695	0.450677331415591	-0.489340390911141	0.624600729949411	0.914828417218444
ENSMUSG00000115105.1	0	NA	NA	NA	NA	NA
ENSMUSG00000042496.18	309.407906638976	-0.466427689768765	0.468308884055918	-0.995983005338571	0.319258402568798	0.843699396612436
ENSMUSG00000063382.6	451.340949574698	-0.457839965139775	0.495322076019771	-0.924327800648039	0.355315672597274	0.852651056336119
ENSMUSG00000002020.15	0.930125463498179	3.49567907109695	4.56516090909174	0.765729651310895	0.443837180254806	NA
ENSMUSG00000024317.15	259.03184763804	-0.732682900894427	0.523313712002067	-1.40008351413413	0.161488311210227	0.815951612175072
ENSMUSG00000029381.16	1040.15691796578	0.893476538915821	0.441844071353353	2.02215350808971	0.0431604955949454	0.67299104301114
ENSMUSG00000035164.8	191.554550188055	-0.56056433371	0.587569513396887	-0.954039174819055	0.34006381297169	0.847340974237845
ENSMUSG00000025047.9	2088.59430327981	0.110617596002045	0.418123031518719	0.264557528917401	0.791350341591881	0.956496378743328
ENSMUSG00000026657.16	1582.8741671665	-0.690920111037374	0.489583192023338	-1.41124148519469	0.158173421629624	0.815951612175072
ENSMUSG00000029563.16	5.42316155537744	-2.6720788726501	1.86700696297319	-1.43120991278728	0.152370063410311	0.815951612175072
ENSMUSG00000056536.14	553.96640237662	-0.934611451417035	0.581477246064245	-1.60730528622228	0.107987415259478	0.791186343380353
ENSMUSG00000025512.15	5235.06595934537	0.276560493795089	0.426374890860028	0.648632224184794	0.516576121760641	0.886568509765948
ENSMUSG00000034269.12	2809.00055516749	-0.704086277383373	0.511195478732707	-1.37733275561994	0.168409392515578	0.819808983974546
ENSMUSG00000045205.16	441.250919475348	-0.805463773062071	0.460443832785121	-1.74932036376729	0.0802356578710572	0.756635503041468
ENSMUSG00000032232.14	124.491462078699	-0.215917640935733	0.587590482239518	-0.367462795028254	0.713273838894061	0.9381095419377
ENSMUSG00000109945.1	1.24860005421734	3.94085436409468	3.68003244383199	1.07087489695909	0.284225684528488	NA
ENSMUSG00000027709.9	456.225600022875	-1.27731522134018	0.433880789919383	-2.94393126180468	0.00324071967237074	0.16984542429691
ENSMUSG00000074802.11	463.504530025275	-0.92029179205254	0.557051321292246	-1.65207720882458	0.0985188123998179	0.789193042121322
ENSMUSG00000028289.12	44.3065454926503	-0.855639648719017	0.692385494469696	-1.23578505840068	0.216538470376971	0.829231175924863
ENSMUSG00000028434.12	193.524037270187	-0.191674821804498	0.490912348747012	-0.390446119951396	0.696206689842264	0.933764396033606
ENSMUSG00000041992.9	46.9324499816774	0.1050746334946	0.718518313442841	0.146237933715462	0.883733560662613	0.976256598247058
ENSMUSG00000061315.14	14801.6758995367	0.100208551765662	0.440914632801464	0.227274271050978	0.820210478376453	0.962747894970423
ENSMUSG00000025885.18	131.189370138779	-0.101109608723269	0.51674659692368	-0.195665746664224	0.844871796334155	0.968021422620809
ENSMUSG00000097746.2	27.5898402076404	-1.07792030163277	0.816166612962417	-1.32071109564293	0.186597712991041	0.82505459371529
ENSMUSG00000003660.10	7403.17739446635	-0.0682314460404211	0.400468702435254	-0.170378972502732	0.864712107869268	0.971935448077324
ENSMUSG00000037172.14	662.123536263173	-0.851280651438553	0.593270146259904	-1.43489548025499	0.151316883855587	0.815951612175072
ENSMUSG00000005198.15	658.515334339309	-0.0200565096325238	0.447288193728845	-0.0448402392768776	0.964234651028647	0.993956655512203
ENSMUSG00000005225.15	710.943945353983	-0.612885442364651	0.53217374841746	-1.15166417769987	0.249459097968608	0.83328917909799
ENSMUSG00000030945.17	0	NA	NA	NA	NA	NA
ENSMUSG00000075520.5	0	NA	NA	NA	NA	NA
ENSMUSG00000000915.15	1267.36984306984	0.29836135278437	0.461057066572137	0.6471245631319	0.517551329138122	0.886844462293945
ENSMUSG00000021824.13	701.111925482462	-0.973404600729696	0.622240126325083	-1.56435523770955	0.117734166609211	0.801003631341269
ENSMUSG00000031907.9	475.760622491888	-0.453682620648544	0.514723836543112	-0.881409774405395	0.378096069153227	0.857689535988889
ENSMUSG00000045912.9	10.5749640838497	0.107015860180378	1.25709490647816	0.0851294994744591	0.932158438236796	0.988619950690484
ENSMUSG00000006169.19	2337.043997686	-0.492811507469205	0.456344913769997	-1.07991015698618	0.280182189841259	0.839290322368936
ENSMUSG00000027955.16	4.04590368307918	-0.871862389086707	2.03928475085103	-0.427533422550659	0.668990846755085	NA
ENSMUSG00000057894.10	111.842064319466	-1.18892278547644	0.643994665993066	-1.84616868470963	0.0648677163762975	0.742659279496764
ENSMUSG00000033590.8	0	NA	NA	NA	NA	NA
ENSMUSG00000070639.5	487.099891360838	-0.38507108704834	0.544331252462519	-0.707420500488083	0.479305200795132	0.874663631084618
ENSMUSG00000025969.15	366.763503160445	-0.581820573246841	0.508897392058118	-1.14329643328256	0.252915535382965	0.83506523083802
ENSMUSG00000052551.16	19.6394303456269	-0.239819956842289	1.05582680094067	-0.227139485973102	0.820315280984542	0.962747894970423
ENSMUSG00000114832.1	0	NA	NA	NA	NA	NA
ENSMUSG00000049791.4	562.754540732755	-0.758348735014736	0.580528947400582	-1.30630649584379	0.191448348968391	0.825325654482975
ENSMUSG00000056579.18	750.502470376383	-0.994571402829437	0.522359867562429	-1.90399658279753	0.0569106292303874	0.717956416527001
ENSMUSG00000039529.9	9.68882153333438	-0.170330643507595	1.27181279121139	-0.133927449609433	0.893459944168408	0.979106367718703
ENSMUSG00000027660.16	264.305962838007	-0.765695030422274	0.586751032564824	-1.30497432117886	0.191901591890491	0.825325654482975
ENSMUSG00000021279.5	4265.96252632588	0.327888472174938	0.437477504321563	0.749497903174302	0.453557161983578	0.871927817221244
ENSMUSG00000014496.8	545.111525456311	-0.847755899974258	0.617821118628602	-1.37217047849716	0.17001037327523	0.820335994164243
ENSMUSG00000044098.14	185.059678563961	-0.643968920967084	0.495146016072886	-1.30056367225681	0.193407848504932	0.826044124002817
ENSMUSG00000033039.10	850.246806525607	-0.121085388485219	0.420213274975551	-0.288152221017443	0.77323022037779	0.950980993223042
ENSMUSG00000021036.10	1939.73573233564	-0.33876784646332	0.435484684887905	-0.777909897222953	0.436622133170529	0.867930343882203
ENSMUSG00000042439.13	3279.30960067117	-0.0934682192104044	0.409224380592365	-0.2284033494659	0.819332685771931	0.962747894970423
ENSMUSG00000074968.11	681.999697499895	0.279924192822673	0.461422041689394	0.606655442375039	0.544079598178588	0.892277914303018
ENSMUSG00000074291.3	0	NA	NA	NA	NA	NA
ENSMUSG00000018583.5	11998.1914839319	0.340823984497615	0.399422337122899	0.853292249383504	0.393497257111958	0.858285420121816
ENSMUSG00000058897.17	3.01051970404852	0.753420771859704	2.37405913554712	0.31735552016318	0.750973853835085	NA
ENSMUSG00000106826.1	1.60932973434281	1.37430816788809	2.84490598011903	0.483076831885525	0.629041183624148	NA
ENSMUSG00000026116.11	1015.31537674332	-0.839637734299218	0.443139539809252	-1.8947479492817	0.0581258019843977	0.720460955956678
ENSMUSG00000063870.12	6595.01358637316	-0.522636859855612	0.401110949507516	-1.30297330575818	0.192583875180014	0.825887352816031
ENSMUSG00000028132.15	47.3147182770896	-0.377601286337428	0.713821745150225	-0.528985406935118	0.596815573170194	0.905602798442133
ENSMUSG00000035722.15	1037.50208141565	-0.305895725360332	0.49890126427795	-0.613138805737543	0.539784563156357	0.891388306357067
ENSMUSG00000063550.8	1594.50336887614	-0.571584858196336	0.45743814759891	-1.24953474299549	0.211469554291056	0.829231175924863
ENSMUSG00000028207.18	2976.74856537489	-0.745288778652812	0.492554381450972	-1.51310963158491	0.130251813485286	0.807025597785238
ENSMUSG00000044452.10	1137.02646227081	-0.798378557979126	0.567603472106663	-1.40657800244939	0.159552559739609	0.815951612175072
ENSMUSG00000034533.10	0	NA	NA	NA	NA	NA
ENSMUSG00000001995.9	6343.39840606059	1.11475250575403	0.421054703685543	2.64752417202912	0.00810835628040643	0.31143178823705
ENSMUSG00000033883.11	108.198377527661	-1.23080744499037	0.590103069322718	-2.08574994602724	0.0370012795948754	0.638780007091506
ENSMUSG00000021431.15	489.729284357658	-0.739444609601294	0.538991885907357	-1.37190304517569	0.170093622305616	0.820335994164243
ENSMUSG00000021057.15	75.0621080627757	-0.130760073927964	0.665618381853313	-0.196449012666812	0.844258736993244	0.967927216149852
ENSMUSG00000021918.10	681.663594744536	-0.487076700145698	0.568350906582595	-0.8569999528538	0.391444910677941	0.858285420121816
ENSMUSG00000037754.13	505.098788765915	0.805896316897408	0.427776623686261	1.88391855065102	0.0595759935619185	0.726183056660141
ENSMUSG00000046049.7	0.214951870793757	-1.14900650751966	4.9950726440521	-0.23002798745837	0.818070021930774	NA
ENSMUSG00000020821.17	10774.3776754274	0.371813775007143	0.438860296207986	0.847225821565166	0.396869263527888	0.858285420121816
ENSMUSG00000049739.10	3339.22976367783	0.276377430897198	0.412045212418046	0.67074540018389	0.502382735426706	0.882953667265215
ENSMUSG00000036466.17	1590.26617570007	0.548528318599224	0.42803281179896	1.28150997652222	0.200014597997127	0.827154552458072
ENSMUSG00000027435.8	1994.20277117871	-1.04332406156682	0.538062806320232	-1.9390376909752	0.0524967488372888	0.701835890634069
ENSMUSG00000062257.13	40.7539011017973	0.0605288661898028	0.745401548265716	0.0812030325542413	0.935280487853482	0.988968650001092
ENSMUSG00000026932.14	5745.37253518664	0.336749450352591	0.412865544156872	0.815639510534306	0.414706344759566	0.861132175618031
ENSMUSG00000042793.13	9.2416811525038	3.21895736160798	1.43561459582421	2.24221554376153	0.0249474450330152	0.555258848020539
ENSMUSG00000090966.2	0	NA	NA	NA	NA	NA
ENSMUSG00000001870.16	1297.31801409129	-0.0071976539204133	0.409574469988144	-0.0175734926071482	0.985979103246502	0.998302837890316
ENSMUSG00000029787.10	366.518425737954	-0.74647004438074	0.551331883945476	-1.35393955277682	0.175755663383946	0.820335994164243
ENSMUSG00000038244.14	1137.67600120817	-0.330248123220019	0.414435960522673	-0.796861649755298	0.425531385792655	0.863914817366033
ENSMUSG00000095105.2	29.5530523246349	-0.29386718791997	0.973362894286514	-0.301909174517463	0.762721301671232	0.948497231167795
ENSMUSG00000089824.10	203.863587164115	-0.438700106898728	0.507690961951161	-0.864108561658678	0.387528256185799	0.858285420121816
ENSMUSG00000024754.13	3084.77965826807	-0.183784456901146	0.469582555056171	-0.391378374094758	0.695517575033759	0.933764396033606
ENSMUSG00000033768.17	3777.82441978579	-0.440607303209179	0.482028177507105	-0.914069599598634	0.360680275356406	0.854822373161201
ENSMUSG00000092035.8	2369.63849606937	0.456558325689794	0.464524713248666	0.982850454816153	0.325681045368988	0.844910646516937
ENSMUSG00000040549.16	1768.32882291034	-0.483111620130877	0.49521200665324	-0.975565240018835	0.329279957004246	0.844910646516937
ENSMUSG00000031093.14	74.2546534839323	-1.47883416774537	0.64122852904075	-2.30625136089568	0.0210965912099928	0.526966581997755
ENSMUSG00000004085.14	1691.86203342704	-0.806469252156449	0.533815199642428	-1.51076487274371	0.1308483674168	0.807025597785238
ENSMUSG00000020262.15	444.405372814313	-0.615655918390708	0.440597907531743	-1.39731920616612	0.162317602778582	0.815951612175072
ENSMUSG00000057672.16	2793.91375000114	0.438230386259305	0.477665704191328	0.917441596526622	0.358911283976495	0.853793937135826
ENSMUSG00000020340.16	995.588600342932	-0.118320159324302	0.411772479167954	-0.287343533893728	0.773849292202645	0.951379423943252
ENSMUSG00000058290.4	1601.90105829087	0.214585829072926	0.465064853177504	0.461410548672496	0.644504084788051	0.921611264505434
ENSMUSG00000018476.7	319.75178979827	-0.358193624680897	0.501979987598046	-0.713561563270359	0.475498332296618	0.874341358146023
ENSMUSG00000111590.2	0	NA	NA	NA	NA	NA
ENSMUSG00000028152.10	5656.92122831195	-0.869809964843832	0.411266866026469	-2.11495269056723	0.0344339796912769	0.620558806921247
ENSMUSG00000097910.2	0.449591429056578	0.237654928581694	4.98502165035908	0.0476738006874202	0.961976214376669	NA
ENSMUSG00000026883.17	4963.02165300134	0.520375583496289	0.431556351194204	1.20581143587924	0.227890205049863	0.829231175924863
ENSMUSG00000022637.11	332.254857911734	-0.770626860489093	0.456202496319032	-1.68922105141261	0.0911770762125208	0.77973689228053
ENSMUSG00000031273.16	320.804575414461	-0.235306872030498	0.480517664486344	-0.489694530339551	0.624350072898854	0.914792265539327
ENSMUSG00000014547.10	1107.61525130556	-0.634386762958662	0.606362698482407	-1.04621666957152	0.295461008325366	0.839689233901408
ENSMUSG00000022076.10	0	NA	NA	NA	NA	NA
ENSMUSG00000075470.2	1287.98453109986	-0.866352350748477	0.567349161479309	-1.52701794515664	0.126756549132248	0.805470426039479
ENSMUSG00000028243.5	217.801556182287	-0.697384314382066	0.634875614448044	-1.09845818379458	0.272004467647673	0.839290322368936
ENSMUSG00000072825.11	1073.50253437579	0.558197733937888	0.477379250690248	1.16929617936009	0.242284321957866	0.832237885230054
ENSMUSG00000052539.15	330.333236393186	-0.975886443830821	0.594530237998019	-1.64144122781199	0.100705857673065	0.790256855363414
ENSMUSG00000055660.9	331.209323073496	-0.548113146648389	0.486794709271614	-1.12596364793801	0.260180906617543	0.836276597713788
ENSMUSG00000003929.11	57.3396380590624	-1.08222542115504	0.777659724702713	-1.39164391156911	0.164030254663923	0.815951612175072
ENSMUSG00000057981.5	0	NA	NA	NA	NA	NA
ENSMUSG00000058740.14	393.643059266907	1.05988187646919	0.470864840359247	2.25092592528367	0.0243902294098154	0.553642055133002
ENSMUSG00000043308.2	0	NA	NA	NA	NA	NA
ENSMUSG00000040818.10	1468.32141267135	-0.877440647827269	0.621147745985192	-1.4126118198104	0.157769891755235	0.815951612175072
ENSMUSG00000048402.14	69.240899322789	1.24017073673083	0.620352555136603	1.9991385970156	0.0455933600144678	0.678280385354122
ENSMUSG00000075387.2	0	NA	NA	NA	NA	NA
ENSMUSG00000035910.15	1.58341384543255	0.557144464810815	3.30552270305862	0.168549580462807	0.866150941971549	NA
ENSMUSG00000029207.16	738.870382279743	-0.417516674786997	0.512385677109754	-0.814848449984217	0.415159063829555	0.861132175618031
ENSMUSG00000033444.14	2600.74972655966	-0.374513087199771	0.432706884056462	-0.865512200057586	0.386757722687384	0.858285420121816
ENSMUSG00000041720.14	2775.90355996135	-0.605125178489341	0.402318061721538	-1.5040964750625	0.132556527796056	0.809315755979747
ENSMUSG00000027309.18	1755.25710737606	-1.17116854379334	0.464242925818951	-2.52274935956716	0.0116441361535121	0.383027265640864
ENSMUSG00000028613.14	996.196988219509	-0.601377310951805	0.423253522451904	-1.4208441963295	0.155362058923964	0.815951612175072
ENSMUSG00000040035.14	199.869911831299	0.795548958648549	0.500853531836765	1.58838644050499	0.112198981725053	0.797538842307736
ENSMUSG00000026042.16	903.121350203089	1.48141487524688	0.424967288938703	3.48595036325385	0.000490391988855713	0.0440017691361739
ENSMUSG00000031592.10	451.58914778611	-0.878607687272387	0.526235467496965	-1.66960940784071	0.0949966678399827	0.781245657902783
ENSMUSG00000028036.6	6.84962442739096	4.88909893252615	2.02899620702991	2.40961462401298	0.0159693788107941	0.462280574864056
ENSMUSG00000024743.16	1173.98798102183	-0.128403061374562	0.424360108292628	-0.302580423714141	0.76220963513314	0.948497231167795
ENSMUSG00000070808.4	136.281961119773	0.168942969086777	0.566896377209176	0.298013844996648	0.765692596701973	0.948838736245728
ENSMUSG00000053541.3	0	NA	NA	NA	NA	NA
ENSMUSG00000031142.17	1.36002920508569	1.08521659133844	3.55378260996388	0.305369436018898	0.760084797280712	NA
ENSMUSG00000024388.10	0	NA	NA	NA	NA	NA
ENSMUSG00000097695.1	0	NA	NA	NA	NA	NA
ENSMUSG00000024897.9	129.704319730265	0.123221727363324	0.513657044827959	0.239891049103775	0.81041472006374	0.96189372389144
ENSMUSG00000014498.9	1371.46776525899	0.123285364163745	0.470510903041664	0.262024457598654	0.793302586316666	0.957672436902958
ENSMUSG00000059142.16	169.187201589347	-0.486221455742472	0.555255948842679	-0.875670862700173	0.381208989744982	0.858285420121816
ENSMUSG00000029094.12	1396.93209308044	0.112195315616827	0.408506764576526	0.27464738737713	0.783587155897561	0.953920977689197
ENSMUSG00000037331.15	2508.30943608365	0.0083260991651809	0.401722619485577	0.02072599042554	0.983464236109452	0.998096788691936
ENSMUSG00000111611.1	0	NA	NA	NA	NA	NA
ENSMUSG00000070867.4	21.8638105495783	-0.4511961485196	0.902992857892913	-0.499667460905995	0.61730924788441	0.9128326764469
ENSMUSG00000055409.14	1.89345566659861	0.956737440193522	2.82257854304084	0.338958659822732	0.734640873178648	NA
ENSMUSG00000067951.5	0	NA	NA	NA	NA	NA
ENSMUSG00000031502.11	3508.24067158057	1.04294917439725	0.422697217160356	2.46736702314649	0.0136110765921508	0.418040556695843
ENSMUSG00000020674.17	4240.78156660077	0.250532245515355	0.402735386525317	0.622076564160091	0.533891524389764	0.890412651685341
ENSMUSG00000075062.4	0	NA	NA	NA	NA	NA
ENSMUSG00000033658.16	538.855918957152	-0.735896869270248	0.499980102351462	-1.47185231134048	0.141060763829732	0.813425091020843
ENSMUSG00000036197.16	214.983751940969	-1.00559250473379	0.568493967096891	-1.76887102227137	0.0769154010265236	0.753773617904001
ENSMUSG00000025272.16	956.736043395407	0.226443188408075	0.424190625428108	0.533824122538164	0.59346322264355	0.905305978190663
ENSMUSG00000029461.17	1590.39240952741	-1.15647494777939	0.572267705518479	-2.02086355149399	0.0432938918877995	0.67299104301114
ENSMUSG00000029335.5	4.44600873814277	-0.553758816618591	1.76131714656732	-0.314400400687536	0.753216951863166	NA
ENSMUSG00000073591.4	453.090702756145	-0.0368165994823677	0.441587538187651	-0.0833732755083379	0.933554737568067	0.988850212822259
ENSMUSG00000061311.6	2.33634214967867	2.05751361421134	2.88685018565107	0.712719220567142	0.476019520372045	NA
ENSMUSG00000047655.2	0.31004182116606	1.86993753835657	4.97468760336826	0.375890445279512	0.7069983440692	NA
ENSMUSG00000048827.12	0.429903741587514	-2.1196455349258	4.8955512206099	-0.432973824480122	0.665033786086064	NA
ENSMUSG00000001855.15	1475.85993569961	0.0492301125113754	0.445249598492169	0.110567449534132	0.911959360686085	0.983512343302559
ENSMUSG00000037692.14	1560.5090742009	0.0927766127500857	0.460621103335975	0.201416331293043	0.840373046354339	0.967852138608692
ENSMUSG00000068966.10	144.608279405179	-0.53821356866238	0.514717074408923	-1.04564933906737	0.295722960712172	0.839974355971123
ENSMUSG00000091059.2	0	NA	NA	NA	NA	NA
ENSMUSG00000001027.7	0.31004182116606	1.86993753835657	4.97468760336826	0.375890445279512	0.7069983440692	NA
ENSMUSG00000026771.14	264.586669276334	-0.0518723576541076	0.502678768749125	-0.103191861043162	0.91781069937445	0.985619326117122
ENSMUSG00000025583.15	2809.25360271195	0.0746054036094368	0.446933215668071	0.166927408825315	0.867427166596801	0.972982492884552
ENSMUSG00000015468.14	96.1442301932	0.101163875400406	0.56135425838247	0.180213962733457	0.856984597215866	0.970766329505918
ENSMUSG00000035898.13	192.770687702944	-0.755968953201661	0.523032944614287	-1.44535628393189	0.148357835974001	0.815951612175072
ENSMUSG00000056043.5	2.65272730449654	-4.74099937214679	2.74334051136971	-1.7281847996987	0.083955098012087	NA
ENSMUSG00000054843.9	2174.27386864089	-0.433302522634343	0.52283447997498	-0.828756593587858	0.407242154624869	0.861011377720667
ENSMUSG00000049878.13	393.444644272214	-0.72056943641088	0.516393475813731	-1.39538834272724	0.162898764706006	0.815951612175072
ENSMUSG00000021540.16	3476.96783503169	-1.00410111720742	0.581576407004988	-1.72651624982237	0.0842545784652235	0.76151181561853
ENSMUSG00000071550.14	10.7930099894719	-0.454412450501805	1.2226639477837	-0.371657683475095	0.71014773528202	0.937376870456567
ENSMUSG00000117800.1	0.449591429056578	0.237654928581694	4.98502165035908	0.0476738006874202	0.961976214376669	NA
ENSMUSG00000040860.16	995.885514734575	0.213769931873853	0.492028427401656	0.434466628285579	0.663949623309206	0.926860784308315
ENSMUSG00000036391.16	226.867174360477	-0.859248364334034	0.53045190453991	-1.61984217038359	0.105266184962323	0.791186343380353
[truncated: 53,451 more rows]

## Sheet: MEF
baseMean	log2FoldChange	lfcSE	stat	pvalue	padj
ENSMUSG00000020255.8	1278.58349338815	-0.00285073991432462	0.207318395893024	-0.0137505400909797	0.98902900208767	0.995988969151346
ENSMUSG00000051747.14	3.37994031367957	-0.00273074092344966	1.87859723750224	-0.00145360637657512	0.998840190323087	NA
ENSMUSG00000115801.1	1.19332951040439	0.11974825773797	2.77789418678699	0.043107566266401	0.965615787899242	NA
ENSMUSG00000101609.2	52.2828670566391	0.378303283008352	0.474086733629765	0.797962179012979	0.424892438328807	0.709989468851068
ENSMUSG00000104211.1	0.601296185730502	1.83692126801588	3.43456722021412	0.534833401193806	0.592765064142056	NA
ENSMUSG00000089940.1	12.1687210227384	0.140904539784819	0.826103464608137	0.17056524493776	0.864565627915821	NA
ENSMUSG00000044768.16	565.636149926223	0.340249469572378	0.233415990736791	1.45769562958545	0.144924457140964	0.439801711778417
ENSMUSG00000109536.1	19.2318077735524	-0.0813990343923607	0.783701027931446	-0.103864907013343	0.917276556584992	NA
ENSMUSG00000096054.3	643.653088878378	0.824773669260979	0.258034870239772	3.19636515985061	0.00139170858421758	0.0405856364851209
ENSMUSG00000022708.16	340.268902625812	1.08141993399582	0.265115511809122	4.07905190690773	4.52197404237849e-05	0.00380071918261912
ENSMUSG00000091239.2	0	NA	NA	NA	NA	NA
ENSMUSG00000109564.1	1.6687064713629	0.67595359000091	2.09942972153081	0.321970096483169	0.747475348766472	NA
ENSMUSG00000109125.1	0	NA	NA	NA	NA	NA
ENSMUSG00000061462.17	1.19540504303645	0.041273336723083	2.38181390988534	0.0173285312306661	0.986174524387472	NA
ENSMUSG00000030209.14	3.56913966789447	0.472964391790852	1.61028473052622	0.293714759150883	0.768975875340781	NA
ENSMUSG00000028649.18	4562.6986985633	1.11589418995404	0.304514930482422	3.66449746219736	0.000247824697045277	0.0129778337845198
ENSMUSG00000026131.18	1946.67551989464	0.650412149859172	0.246953203144131	2.63374656241883	0.00844484962760469	0.108509467626907
ENSMUSG00000026950.17	6.12658024597235	3.23966116737295	1.42794214438632	2.26876220448361	0.0232827905382207	NA
ENSMUSG00000096002.2	0.122882105667747	-2.22469946248955	4.49871564905916	-0.494518799594462	0.620939832792723	NA
ENSMUSG00000063450.14	137.824767217557	0.494181553031429	0.445857274435275	1.10838508501933	0.26769554349542	0.575936172936027
ENSMUSG00000066037.14	1228.74379745133	0.286826373031641	0.238982958705767	1.20019592436621	0.230063257828617	0.538255165497432
ENSMUSG00000075249.12	0	NA	NA	NA	NA	NA
ENSMUSG00000049133.7	0	NA	NA	NA	NA	NA
ENSMUSG00000092274.3	1153.15218388819	0.360726902205391	0.313948658121909	1.14899966243945	0.250556119852411	0.559361125129725
ENSMUSG00000061601.15	9.79132229515483	1.0984925158271	0.941554839106676	1.16667927368875	0.243339915982439	NA
ENSMUSG00000048154.17	788.149873099532	0.901799953644028	0.816649032854509	1.10426868503338	0.269476602633564	0.577515031134958
ENSMUSG00000059146.12	40.1098324952792	1.56502895623916	0.579033542297451	2.70282952871701	0.0068751997106855	0.0979424636751044
ENSMUSG00000071753.12	0.490565124311178	-0.0330978367573986	3.64619533003513	-0.00907736250023658	0.992757412071463	NA
ENSMUSG00000057230.13	850.639953003309	0.939900061101449	0.299750912786492	3.13560366627115	0.00171500803026855	0.0452224078255911
ENSMUSG00000069170.14	22.956770936822	0.0660444483182964	0.635344229978458	0.10395065415253	0.917208508610962	NA
ENSMUSG00000078578.9	9555.20480997184	-0.238261483901529	0.244945113093212	-0.972713767965075	0.330695580567072	0.633052550528967
ENSMUSG00000043467.19	329.204050473182	0.526908095145315	0.317985902129054	1.65701715584696	0.0975160066393187	0.3647393281378
ENSMUSG00000074505.5	43.7888998317591	0.679893791015288	0.540603079069818	1.25765800702641	0.208515465236932	0.515957428689097
ENSMUSG00000036800.8	0.375833645427795	1.19628018486149	4.50238501038632	0.265699219880541	0.790470864239934	NA
ENSMUSG00000118215.1	1.57012559824819	0.258108567341982	3.0359993249287	0.0850160160519941	0.93224865783951	NA
ENSMUSG00000054640.15	721.502658523628	0.119109533728053	0.205754936724326	0.578890283870261	0.562663206571335	0.801644710785487
ENSMUSG00000069833.13	22018.157211393	1.17675224976287	0.205276227703445	5.73253056590109	9.89431969427795e-09	6.65294056243249e-06
ENSMUSG00000058006.12	844.689350881375	0.871792268330987	0.275139912472804	3.16854163576561	0.00153205803226964	0.0431129911597193
ENSMUSG00000086503.4	118.854560373676	-0.620636270938551	2.35698491876314	-0.263317879549368	0.792305579934556	0.9134098104552
ENSMUSG00000066842.18	1690.90342088485	2.09878820604532	0.287168853617	7.30855097831917	2.70038496649942e-13	1.21049256764947e-09
ENSMUSG00000117815.1	0.35345729770676	1.04101742288118	4.51295095850968	0.230673329369605	0.817568594852655	NA
ENSMUSG00000040838.10	0.493603099359236	-1.08128123525031	3.63924567104517	-0.297116856895174	0.766377295235896	NA
ENSMUSG00000095961.2	0	NA	NA	NA	NA	NA
ENSMUSG00000092111.2	0	NA	NA	NA	NA	NA
ENSMUSG00000047888.10	704.810523198998	0.776009423938663	0.250573300619919	3.09693579491037	0.00195532219111818	0.0493562712143228
ENSMUSG00000090655.2	0	NA	NA	NA	NA	NA
ENSMUSG00000038872.10	1405.33883552113	0.366991225513854	0.256995554762011	1.42800612194909	0.153290096445017	0.450786183466562
ENSMUSG00000048108.13	0	NA	NA	NA	NA	NA
ENSMUSG00000021313.16	7.05373338100963	1.16881968793703	1.39739224542082	0.836429207165845	0.402913487217133	NA
ENSMUSG00000070327.14	969.627988451993	0.720232650350184	0.323372920818559	2.2272509662437	0.0259305056092172	0.191917137827602
ENSMUSG00000033826.10	15.5298090703397	0.72695465633567	0.761878682302326	0.954160646861626	0.340002331278341	NA
ENSMUSG00000079173.11	8.74340951777167	-0.885486368247977	1.18034694891261	-0.750191601769065	0.453139316115926	NA
ENSMUSG00000002028.13	380.009082302601	0.61311883765537	0.282970610819741	2.16672267087815	0.0302560068645456	0.208872063816432
ENSMUSG00000026915.16	668.182257497157	0.650032727699769	0.279105475431017	2.32898593872419	0.0198598106277164	0.168449133952481
ENSMUSG00000049252.17	2.98318058142908	1.74327469702352	2.09516659287918	0.832045863535801	0.405383057325413	NA
ENSMUSG00000045991.19	4.19677246400884	2.67729144171911	1.57009154986136	1.70518174048865	0.0881605343876434	NA
ENSMUSG00000034275.18	1311.17904994966	0.961951734976041	0.291257511641592	3.30275339356663	0.000957405440999804	0.0317905885692972
ENSMUSG00000046743.6	3887.72993678313	2.64478732704526	0.304703987746352	8.67985793886914	3.96263462898552e-18	5.32895104905973e-14
ENSMUSG00000108621.1	168.662893662762	1.20159881034634	0.383063521892112	3.1368134569722	0.00170794757338013	0.0451247130978703
ENSMUSG00000004668.14	8.66174582623939	0.838274333897786	1.03615356841017	0.809025186473084	0.418500659079871	NA
ENSMUSG00000055296.14	3223.86413907408	0.892340254787238	0.249311075485013	3.579224280555	0.000344615621879168	0.0162610206422142
ENSMUSG00000091006.3	0	NA	NA	NA	NA	NA
ENSMUSG00000032589.14	11.8210517885215	-0.871739791021749	0.935786660844416	-0.931558257343748	0.351564864110763	NA
ENSMUSG00000066036.14	4931.57401164515	0.844640241191833	0.286185955418165	2.95136859514183	0.00316369128983089	0.0639779255122494
ENSMUSG00000037270.18	527.77469086242	1.40104379676114	0.360473761853939	3.88667344207103	0.000101627321945549	0.00669943247805756
ENSMUSG00000020220.16	937.149668626615	0.674145417106072	0.233109053910475	2.89197440338365	0.00382829135257372	0.0709719444541979
ENSMUSG00000034687.8	193.885019899746	1.57666743567866	0.367262707506236	4.29302350457647	1.76256339145515e-05	0.00197524604069074
ENSMUSG00000068250.13	303.850124388294	0.123187726431152	0.26439909129974	0.46591584647883	0.641275737929706	0.841682229521636
ENSMUSG00000059854.8	1.66055584457853	0.667581770946004	2.09979525489136	0.317927078552497	0.750540251739052	NA
ENSMUSG00000024073.16	2858.28525387262	1.03372656937698	0.261117682580467	3.95885318512823	7.53105111325193e-05	0.00547446353356821
ENSMUSG00000073664.11	1083.35293968656	0.75742105527256	0.325316871327471	2.32825630033225	0.0198984982474066	0.168449133952481
ENSMUSG00000026609.15	0.247838888023742	0.695409143274194	4.52942914800281	0.153531299541538	0.877979309434662	NA
ENSMUSG00000055632.18	37.9074434766874	0.319523156712059	0.512587819015415	0.623353003834159	0.53305257386839	0.783927243192579
ENSMUSG00000022262.8	1.81700204385593	0.886691167786081	2.07747892279148	0.426811149830895	0.669516884697663	NA
ENSMUSG00000028842.15	477.482720164268	0.683650045184322	0.288286260031101	2.37142777845385	0.0177195093131534	0.15907340536935
ENSMUSG00000094747.3	0	NA	NA	NA	NA	NA
ENSMUSG00000029797.13	7.93267585528869	-0.630747796040683	0.960164163043226	-0.656916619384687	0.511234531382842	NA
ENSMUSG00000030655.15	1374.18543185712	0.790466712380463	0.325871809235296	2.42569835738601	0.0152789636449422	0.147821225249772
ENSMUSG00000094145.2	0.119844130619689	-0.0443040953327121	4.56207316163209	-0.00971139518439074	0.992251549512983	NA
ENSMUSG00000042744.16	723.401560910399	1.15426470809839	0.371304532931325	3.1086738935985	0.0018792901873458	0.0482303328996687
ENSMUSG00000036371.6	7910.43834017476	-0.0774303339597388	0.215064356661734	-0.360033318219839	0.718822217641951	0.879168462509655
ENSMUSG00000057378.15	12.5001601837142	0.310438873029793	0.869558518831879	0.357007454135256	0.72108622538347	NA
ENSMUSG00000027070.14	2002.82629850866	1.52981338400026	0.311952576531479	4.9039934242886	9.39076343332165e-07	0.000203688688147274
ENSMUSG00000033306.15	9000.79811546143	1.1542302482809	0.211705005829219	5.45206875841192	4.97871971046315e-08	2.23179408887695e-05
ENSMUSG00000022565.15	15666.2333105347	0.338122203503518	0.226350492441968	1.49379928382619	0.135228088796069	0.42618873637908
ENSMUSG00000033705.17	139.443656642979	0.0448950608836451	0.302982368406725	0.148177140206977	0.88220297212124	0.953303782168456
ENSMUSG00000030592.18	23.4739155399525	-0.382619970107359	0.583120679822874	-0.65615915083578	0.51172172891615	NA
ENSMUSG00000036815.16	0.932377135716226	2.44535907029412	3.54033126944463	0.690714762033476	0.489744810587982	NA
ENSMUSG00000030451.16	2219.27509879268	0.795791105355042	0.217427516588843	3.66002941044435	0.000252186301468169	0.0131449665974571
ENSMUSG00000034731.11	575.814849993248	0.624289578967424	0.292551286050601	2.13394918680838	0.0328469405096766	0.217336842702111
ENSMUSG00000033004.15	717.140812755996	1.01227614118378	0.223208064000928	4.5351235212522	5.75697830041707e-06	0.000892577193937563
ENSMUSG00000038664.16	1113.9786876808	0.775756854996526	0.295607864099345	2.62427678424623	0.00868331886272948	0.110184038575585
ENSMUSG00000022100.14	1776.73422225146	0.317164394212444	0.179124713046517	1.77063448598564	0.0766215033429457	0.327633061035273
ENSMUSG00000044581.8	0	NA	NA	NA	NA	NA
ENSMUSG00000092032.2	0	NA	NA	NA	NA	NA
ENSMUSG00000048279.19	1139.10991879409	1.15768655272916	0.375313634282371	3.08458432356914	0.00203836818630656	0.0504326704675904
ENSMUSG00000033987.16	0.749592614167342	-0.160920016134343	3.16097071804748	-0.0509084172199303	0.959398498237318	NA
ENSMUSG00000038056.15	239.911753811258	0.784832631205911	0.303177930003374	2.58868655511031	0.00963427454252082	0.116407658623378
ENSMUSG00000066108.7	0	NA	NA	NA	NA	NA
ENSMUSG00000004110.16	2.67239302914512	0.443377097741945	1.68725064178934	0.262780814397404	0.792719523881029	NA
ENSMUSG00000045103.17	700.133159156958	0.904004450288548	0.274983706341331	3.28748369245714	0.00101087043556452	0.0331395439478764
ENSMUSG00000040249.15	27645.7111630856	1.65141972486488	0.328736077948864	5.02354270078555	5.0726939866309e-07	0.000124031979513113
ENSMUSG00000061603.8	133.601648485213	0.945840834705315	0.488661302420235	1.9355754794185	0.0529197159642594	0.273857741919137
ENSMUSG00000092083.4	39.7175864474529	0.486411610688838	0.561656806144902	0.866029941001639	0.386473742668276	0.678434615867396
ENSMUSG00000070047.14	31010.3093535515	1.4925530489604	0.222296395815132	6.71424763090468	1.89039042133841e-11	3.17774629826987e-08
ENSMUSG00000094396.3	0	NA	NA	NA	NA	NA
ENSMUSG00000028456.18	281.767680748071	-0.0425263377124113	0.458269964208284	-0.0927975670102678	0.926064383916325	0.972143629354943
ENSMUSG00000038538.17	346.292122941154	0.480663696197354	0.235025519157066	2.04515534279548	0.0408395455732418	0.242798500826241
ENSMUSG00000059003.12	4.60093964092394	-0.419243846050535	1.32670261548963	-0.316004386480998	0.751999178682949	NA
ENSMUSG00000025261.17	3046.63633461808	0.807387269554722	0.271232176201521	2.9767385302946	0.00291332355866099	0.060835986361604
ENSMUSG00000019852.7	10.9036979750821	-0.198860658735446	0.90898072228876	-0.21877324112521	0.826826692435752	NA
ENSMUSG00000021268.17	553.547697070703	-0.0245644047190639	0.383495777073607	-0.0640539119009624	0.948927299415588	0.98051568731394
ENSMUSG00000030882.19	9.98526439300974	2.39341889564273	1.04969822653914	2.28010187607333	0.0226016469934727	NA
ENSMUSG00000055333.14	3.14776913415982	2.06934158612749	1.90919487281276	1.08388180567382	0.278417207655544	NA
ENSMUSG00000102439.4	0	NA	NA	NA	NA	NA
ENSMUSG00000047146.17	56.3620969726589	0.545260659377704	0.51596004693187	1.05678852969347	0.290608110353313	0.597922672889476
ENSMUSG00000018707.13	7744.31938810753	0.9867319824739	0.235392484661028	4.19185847795787	2.7667857790647e-05	0.00273586287918104
ENSMUSG00000091382.2	0	NA	NA	NA	NA	NA
ENSMUSG00000032826.17	567.520374329776	0.43458082895728	0.32592070352637	1.33339436327683	0.182402421215054	0.485100286473931
ENSMUSG00000043940.15	1874.29892613715	0.717675839411404	0.271901023412926	2.63947457940052	0.00830346503195596	0.108097771296945
ENSMUSG00000047193.16	99.3878265510912	0.225668803600757	0.400761877274355	0.563099477264571	0.573367147434577	0.806473655580288
ENSMUSG00000028763.17	20211.3505093764	1.41725427698787	0.342727328546552	4.13522400737111	3.54608561515173e-05	0.00319530751247694
ENSMUSG00000060924.15	14.5841580867151	-0.873349265837458	1.1831997493671	-0.738124958448157	0.460438518375432	NA
ENSMUSG00000032855.6	8784.84760305349	0.858769765691807	0.27871268966929	3.08120081188549	0.00206167553768554	0.0505016623511752
ENSMUSG00000021730.8	52.4915385990764	0.323772821422927	0.535312317512278	0.604829761675531	0.545292116450099	0.791364650941297
ENSMUSG00000091076.2	0	NA	NA	NA	NA	NA
ENSMUSG00000110246.1	1.58753908608916	1.94164666721533	2.20862124210151	0.87912161225428	0.379335340637231	NA
ENSMUSG00000018581.15	12.4464223146764	1.29888220918638	0.862695515460526	1.50560908908053	0.132167553839775	NA
ENSMUSG00000038011.15	13.4048473182265	0.777645154318054	0.832929531807023	0.933626584989692	0.350496546919119	NA
ENSMUSG00000022957.20	1586.69909885457	0.426982450888422	0.224013003801992	1.90606100378815	0.0566422913761457	0.282894506914886
ENSMUSG00000115027.1	0	NA	NA	NA	NA	NA
ENSMUSG00000020609.14	13.7324033306256	0.271850005735678	0.924008225221022	0.294207343955896	0.768599469198184	NA
ENSMUSG00000033943.15	782.916098509498	0.734152611319326	0.31685666084469	2.31698651801161	0.0205044661931656	0.171269603332727
ENSMUSG00000025255.18	529.60558507622	0.425177258468028	0.237670669170895	1.78893449474116	0.0736253656743268	0.320301427211996
ENSMUSG00000052712.17	3753.83258223298	-0.159894788824848	0.182927033653067	-0.874090535618148	0.382068951246527	0.675083859724516
ENSMUSG00000040209.12	428.387630194774	0.740197817974538	0.284993756468147	2.5972422243477	0.00939756274631951	0.115519583009602
ENSMUSG00000036698.11	3773.89699389216	0.694504869542543	0.250554042587208	2.77187652759908	0.00557341728264849	0.0879710277195503
ENSMUSG00000056752.16	2.56163179814321	1.93975959474584	1.88564276884988	1.02869940520546	0.303620949526323	NA
ENSMUSG00000037646.10	392.155318948236	0.920278500636216	0.265399023029689	3.46752783838721	0.000525269331775769	0.02166816556356
ENSMUSG00000026494.12	478.797655452218	0.143233813790954	0.337391720774603	0.424532686996913	0.671177372139874	0.857358613850073
ENSMUSG00000029212.11	118.849761580708	0.467979880202904	0.444755366352443	1.05221862535562	0.292699256098773	0.599576480733633
ENSMUSG00000005237.14	1.68085751561132	-0.161058722400307	2.06151572717984	-0.0781263612384061	0.937727538041894	NA
ENSMUSG00000047369.15	7.25528563716334	0.151124469179041	1.09249860676569	0.138329209980817	0.889980241189573	NA
ENSMUSG00000040865.15	532.918865672899	0.781281700373358	0.254431458930476	3.07069614605655	0.0021356036252225	0.0515440650153718
ENSMUSG00000055567.18	0.378871620475853	-0.491765045423065	4.46402161960983	-0.110161887044366	0.912280987988005	NA
ENSMUSG00000041444.14	150.742788418459	0.24431580255846	0.284982526801066	0.857300990699009	0.391278561149261	0.683289762152321
ENSMUSG00000028804.20	1.07044740473665	0.508826085315479	2.88559051275617	0.176333434375439	0.860031996713407	NA
ENSMUSG00000036257.15	565.016924457746	0.471622731394611	0.349459569260538	1.34957738428102	0.177151582579415	0.479535926434777
ENSMUSG00000052557.11	552.326357741214	0.635641169046303	0.239851458680897	2.65014510456646	0.00804572070821827	0.10712757632091
ENSMUSG00000003847.16	641.725337769899	1.11939409434553	0.259050245764462	4.32114662173812	1.55220484281505e-05	0.00184933965393829
ENSMUSG00000061653.4	0	NA	NA	NA	NA	NA
ENSMUSG00000059742.10	5.5404648062073	1.93641409970605	1.45772137197997	1.32838424195969	0.184051202526518	NA
ENSMUSG00000033671.18	452.911174391565	0.940080324638426	0.281929108522589	3.33445641553222	0.000854662931188005	0.0297759251259489
ENSMUSG00000091945.2	0.750735018022172	-3.52940682707226	4.46208448542903	-0.790977140526489	0.428957331164584	NA
ENSMUSG00000022020.15	193.08722307476	0.462583699848441	0.353485522235242	1.30863549070786	0.190657852907757	0.494927533399218
ENSMUSG00000029104.15	2019.88571477138	0.491657547242721	0.213341598768715	2.30455546447709	0.0211914826458202	0.174408236610153
ENSMUSG00000048280.18	127.274112896394	0.907496698528381	0.382525453364728	2.37238251872119	0.0176737826695867	0.158800014630882
ENSMUSG00000019726.12	372.377382323247	0.667205111486753	0.253997929648305	2.62681318863737	0.00861886370504644	0.109759923395326
ENSMUSG00000048078.16	140.890608555499	0.0511799011392435	0.611560987354151	0.0836873217839934	0.933305037533023	0.975081394969333
ENSMUSG00000051331.15	962.643546555696	0.2524670463374	0.280816728651289	0.899045607254071	0.368628368474527	0.665057368193877
ENSMUSG00000020721.16	567.163379738671	0.859824547573024	0.238318640590409	3.60787786235647	0.000308711746562738	0.0153193932390247
ENSMUSG00000061578.8	0.601296185730502	1.83692126801588	3.43456722021412	0.534833401193806	0.592765064142056	NA
ENSMUSG00000040407.17	715.30915001817	1.16769913690745	0.371804982604238	3.14062261545964	0.00168589118863495	0.0449277119806386
ENSMUSG00000009418.15	389.51692156038	0.821685004255545	0.367411962114257	2.23641331525297	0.0253247097356018	0.190426103453275
ENSMUSG00000015597.17	262.305227599345	0.560142578746343	0.299065845442934	1.87297408674915	0.0610719634178186	0.29447678882855
ENSMUSG00000026565.18	306.593870655984	0.724125084379569	0.360127855225198	2.01074444498817	0.0443524568778085	0.251773676695977
ENSMUSG00000116879.1	0.127994757404053	-0.0443040953327121	4.56207316163209	-0.00971139518439074	0.992251549512983	NA
ENSMUSG00000022311.15	38.9994525399711	-0.798718264932169	0.841530951843707	-0.949125237975216	0.342556919728481	0.643953056643803
ENSMUSG00000068373.15	1.569164011776	-0.31124347363372	2.1746550932315	-0.143123143804481	0.886192926994453	NA
ENSMUSG00000053205.9	234.753533332677	0.45897271797362	0.363022420543539	1.26430956326724	0.206118938418051	0.513788226848183
ENSMUSG00000058192.16	129.416592939735	0.260541616299787	0.331667633233396	0.785550322652204	0.432130977729789	0.714754580681869
ENSMUSG00000079481.11	37.0931631948115	-0.168793442674756	0.5478825013645	-0.308083288395553	0.758018957111286	0.8985849703565
ENSMUSG00000090806.2	0	NA	NA	NA	NA	NA
ENSMUSG00000090619.2	0	NA	NA	NA	NA	NA
ENSMUSG00000038725.13	6.77885572504109	3.39022611924062	1.46446189870337	2.31499783110937	0.0206130507659421	NA
ENSMUSG00000043760.16	12.5463338264158	1.25929039550193	0.948781803563811	1.3272708127114	0.184419115218638	NA
ENSMUSG00000067336.6	2425.94821268895	1.28628603414407	0.299951061142776	4.28831966535966	1.80029876208715e-05	0.00200086097128496
ENSMUSG00000021983.16	11.1771937825357	0.25975532304313	1.06964392657497	0.242842797111814	0.80812718041763	NA
ENSMUSG00000016150.15	5.46141310836685	0.449316630885387	1.19053622389527	0.377406938039469	0.705871211655196	NA
ENSMUSG00000029765.12	414.345425604471	1.0220021907956	0.305119521429897	3.34951426905148	0.000809533858645394	0.0290833448828772
ENSMUSG00000019027.8	10.3674025925499	-0.996166385979565	1.16624831227897	-0.854163196200435	0.393014572220717	NA
ENSMUSG00000029705.17	4720.89767568915	0.145894200125782	0.199747711295438	0.730392349327079	0.465150393532143	0.737397441025611
ENSMUSG00000037234.17	1373.32764406554	0.980834338445091	0.310365082304762	3.16025994664556	0.00157628436824968	0.0436462066216814
ENSMUSG00000005871.15	877.190780518202	0.972074635600519	0.31241731559689	3.11146209595751	0.00186163371640251	0.0479602494601168
ENSMUSG00000068231.5	3.0204079218205	-0.263316737346717	1.89533345432979	-0.138928976716569	0.889506272897181	NA
ENSMUSG00000014767.17	509.762886397258	-0.175331162907423	0.23132726098435	-0.757935585115864	0.448489545830172	0.725263036595017
ENSMUSG00000021488.8	1770.29715435954	0.398587631024304	0.268233766412906	1.48597112270622	0.137286759395054	0.428260807317254
ENSMUSG00000107023.2	8.97590281875409	1.04557376601283	1.02094512142879	1.02412337751277	0.305777003803513	NA
ENSMUSG00000007989.7	442.188754280021	0.387764225725078	0.317755866855684	1.22032121566205	0.222343130292119	0.529590934496709
ENSMUSG00000068284.14	322.13172652136	0.841539759646406	0.338187524977263	2.48838202918036	0.0128325803422942	0.135244937651389
ENSMUSG00000061244.14	1836.60174210096	0.429697796368942	0.377763577869449	1.13747809884795	0.255338475080638	0.563949240280414
ENSMUSG00000052861.13	4.97409523418133	-0.676361737172489	1.33362204445565	-0.50716148550811	0.612041516367315	NA
ENSMUSG00000022672.8	255.299157306437	0.737244081737355	0.356745418517807	2.0665831808028	0.0387734470004881	0.236796237630592
ENSMUSG00000027520.15	178.649532115316	1.05261972773505	0.450271498940804	2.33774451683303	0.0194005053577874	0.16670798469746
ENSMUSG00000091491.2	0	NA	NA	NA	NA	NA
ENSMUSG00000095664.2	0.119844130619689	-0.0443040953327121	4.56207316163209	-0.00971139518439074	0.992251549512983	NA
ENSMUSG00000066406.15	1886.82779271774	0.703340313215999	0.253995608782882	2.76910422422783	0.00562106506645661	0.0884117929984894
ENSMUSG00000010554.14	781.420888104983	0.0818129349098552	0.208833824068271	0.391760938511135	0.69523485919433	0.867088957034269
ENSMUSG00000074925.4	1292.78105066925	0.612403682108916	0.322798853997289	1.89716808013841	0.0578057582122183	0.28632480163459
ENSMUSG00000041297.8	1361.51558333641	0.237362250624493	0.208677233611233	1.13746117157514	0.255345547595735	0.563949240280414
ENSMUSG00000039126.10	322.550255361185	0.804380438256508	0.26190333181257	3.07128753456318	0.00213137791857091	0.0515440650153718
ENSMUSG00000045482.16	2278.45276550523	0.765346323540841	0.296171709925247	2.58413041452883	0.0097624872066354	0.117324332399314
ENSMUSG00000108448.2	0.239688261239378	0.663291498136505	4.53105790254795	0.146387777954353	0.88361527515386	NA
ENSMUSG00000021614.16	3391.80589612274	0.774339205301061	0.334710128699495	2.3134621241064	0.0206972448807136	0.172139668625645
ENSMUSG00000017291.13	2346.42269599393	0.984398347436576	0.334767373801832	2.94054446303151	0.00327635975520455	0.0656639135439506
ENSMUSG00000019820.11	1417.23688194338	0.768134642930362	0.202038069325067	3.80193022778534	0.000143573163696128	0.00849411186374081
ENSMUSG00000037016.11	14.9776459046441	2.80377955001263	0.976360747755868	2.87166352852368	0.00408317461767116	NA
ENSMUSG00000115388.2	15.6363740177939	0.388649468213085	1.09372244336573	0.355345609455621	0.722330690639172	NA
ENSMUSG00000041144.10	26.6336978810531	-1.77666742882262	0.792498233128067	-2.24185664340214	0.0249706389616121	0.189079477903018
ENSMUSG00000052387.16	25.428097460498	0.144248185870202	0.651511877921871	0.221405304735673	0.824776862339309	0.92910028855244
ENSMUSG00000041741.10	499.457378326748	0.490201660528441	0.259882478296172	1.88624359649898	0.0592621361021917	0.29011911405252
ENSMUSG00000036760.7	0	NA	NA	NA	NA	NA
ENSMUSG00000040761.16	428.759935995236	0.775943872137166	0.375172495498979	2.06823229700024	0.0386181846260113	0.236169780286766
ENSMUSG00000052273.4	1.11727563281077	0.612017237830348	2.737500225603	0.223567922335252	0.823093526143358	NA
ENSMUSG00000027692.16	300.130866671915	-0.428575416698087	0.29379153986836	-1.45877385335915	0.144627361314878	0.439801711778417
ENSMUSG00000020431.5	528.645583490175	0.00418640342624284	0.279384637987867	0.0149843722847232	0.98804464809438	0.99573288842616
ENSMUSG00000039585.15	726.451336324791	0.997138309144383	0.358991946879498	2.77760634413086	0.00547609172883464	0.087150865762566
ENSMUSG00000037416.13	763.517097190559	0.997610680583565	0.343163049039895	2.9071040235092	0.00364791867012503	0.0689739382750083
ENSMUSG00000096141.2	3.50730238196269	1.04605619902774	1.59577328128616	0.655516802602837	0.512135071804753	NA
ENSMUSG00000033327.16	21.1843892129715	1.24315489117018	0.709643356145138	1.75180233902722	0.0798078018871886	NA
ENSMUSG00000101337.6	1.94821473774687	0.141736069431834	1.95184792007365	0.0726163488323852	0.942111416580541	NA
ENSMUSG00000015829.13	1.36625692468935	-0.254995068667539	2.75153551355781	-0.0926737334157915	0.9261627648853	NA
ENSMUSG00000056342.16	1269.41887522149	0.75727363515285	0.29235621391812	2.59024299502298	0.00959082059508826	0.116407658623378
ENSMUSG00000033454.6	971.977070432483	0.73447264381894	0.296835258108071	2.47434435012951	0.0133480970455807	0.138293689575477
ENSMUSG00000021140.9	1310.70825199468	0.307989441832587	0.245676682376639	1.2536372554902	0.209973883377978	0.517071742110795
ENSMUSG00000055373.8	0.242726236287436	-1.26292281618843	4.49871515006025	-0.280729669263793	0.778917750679424	NA
ENSMUSG00000052698.15	2054.6223581984	0.429073451978096	0.331384238117184	1.29479137093529	0.195392209539625	0.500787961480631
ENSMUSG00000053141.16	20.3726614410475	0.745404952164087	0.664032009279486	1.12254370534471	0.261631335620255	NA
ENSMUSG00000020783.14	969.847336794836	0.126956969404907	0.214463601567245	0.591974435182182	0.553867707605741	0.796466716667531
ENSMUSG00000094950.2	0.255989514808106	0.72685561749158	4.52786595683885	0.160529402685551	0.87246406196152	NA
ENSMUSG00000063142.15	25.4047285007784	0.374369635046885	0.687896505570604	0.544223777872441	0.586287491158988	0.812698253588899
ENSMUSG00000023845.7	3714.32809032608	1.31806010890622	0.255316387844216	5.16245792146507	2.43728173543384e-07	7.44921926775325e-05
ENSMUSG00000062209.15	18.3560254782403	3.61010266750216	1.00518512168424	3.59148040457788	0.000328804902622181	NA
ENSMUSG00000040481.17	1545.49152810161	-0.508438271296437	0.411545049730877	-1.23543770391339	0.216667647788549	0.524432420349245
ENSMUSG00000117148.1	0.119844130619689	-0.0443040953327121	4.56207316163209	-0.00971139518439074	0.992251549512983	NA
ENSMUSG00000021879.13	1.91768776324147	0.0194662072429089	2.03751613244677	0.00955389109951868	0.992377213760246	NA
ENSMUSG00000056608.14	482.066369548359	0.578150681435629	0.284242732157728	2.03400339226548	0.0419512534285263	0.245180554587928
ENSMUSG00000027022.13	11.2416632460047	0.119169131119071	1.11457772487815	0.10691863695024	0.914853527794582	NA
ENSMUSG00000027204.13	19497.6303970319	0.9467923693317	0.294743903788018	3.21225428978724	0.00131697749227615	0.0396212825864198
ENSMUSG00000037486.18	542.673680207413	0.331092273094802	0.235177869102454	1.4078377117643	0.15917913069715	0.458707729117133
ENSMUSG00000055013.15	1252.21670399224	-0.277905212774235	0.320989607052244	-0.86577635745385	0.386612816904007	0.678434615867396
ENSMUSG00000020716.16	1054.91301199522	0.947410851499356	0.290761276765756	3.25838042134686	0.00112050087806447	0.0355389052080447
ENSMUSG00000020154.10	1041.88016549535	1.26256078106286	0.351313913417693	3.59382515989835	0.000325858542055062	0.0158200204821533
ENSMUSG00000031010.17	2706.35402259727	0.955828354968878	0.34375042475712	2.78058814223787	0.00542605275473784	0.0868685207687078
ENSMUSG00000042197.13	950.114141842804	0.550749521492446	0.271544371357707	2.02821188573613	0.0425386273530655	0.246298447007306
ENSMUSG00000021097.15	58.9124539839753	-0.0796685546939237	0.533795065804178	-0.149249327687023	0.881356897972541	0.952986185031728
ENSMUSG00000053580.16	185.215869497609	0.814290601422925	0.300644298947489	2.70848509109813	0.00675911488686972	0.0968014664522087
ENSMUSG00000047419.5	10.7218431585352	0.534517405642755	0.908825599111094	0.588140789790204	0.556437796288337	NA
ENSMUSG00000039298.16	440.737785876774	0.210519669140507	0.272978317902912	0.771195568782796	0.44059102033353	0.720731263758753
ENSMUSG00000028634.17	27.3656288175007	0.49563815002972	0.625669800840912	0.792172084002733	0.428260343575241	0.712488273351376
ENSMUSG00000027254.13	975.115230952912	0.871856834619539	0.378925097029846	2.30086853959654	0.0213990628572266	0.175259300957367
ENSMUSG00000056258.9	0.724178291398249	0.62087627791031	2.81671450382261	0.220425704155572	0.825539628641688	NA
ENSMUSG00000044042.18	698.366698342603	0.953318320328531	0.220922547395196	4.31516987092853	1.59480219663191e-05	0.00188130701230754
ENSMUSG00000052727.6	2420.59026052859	0.81029907218135	0.342541502562566	2.36555006070643	0.0180033091611817	0.160083964798724
ENSMUSG00000063887.13	11.1567742149306	2.10881788719663	1.14804285615659	1.836880806224	0.0662274933678003	NA
ENSMUSG00000023032.12	108.277479131894	0.240393606671348	0.344352521125571	0.698103228300995	0.485112639317291	0.752806873353333
ENSMUSG00000042678.16	0.485452472574872	-1.10966635354455	4.35808850351189	-0.254622262179931	0.799014863052236	NA
ENSMUSG00000026463.17	840.953862591136	0.97649385880796	0.327177323706605	2.98460127904104	0.00283948183343575	0.0603244102623127
ENSMUSG00000034593.16	1905.27576116976	0.621100815384255	0.301890234417326	2.05737299380695	0.0396503608521942	0.239540904196005
ENSMUSG00000042453.14	12.0326659471849	1.12652579419046	1.09241074521241	1.03122914080401	0.30243337827942	NA
ENSMUSG00000045215.16	17.0195374973484	0.109849365110617	0.794601623268138	0.138244576771458	0.890047126124232	NA
ENSMUSG00000030287.15	422.741540104246	0.70445844598716	0.23006929734955	3.06194026800915	0.00219907330732176	0.0520349413206215
ENSMUSG00000075028.11	152.289960839717	0.279497033925844	0.333006698352276	0.839313549273335	0.401293381903085	0.691778002441363
ENSMUSG00000070601.5	0	NA	NA	NA	NA	NA
ENSMUSG00000091620.3	0.119844130619689	-0.0443040953327121	4.56207316163209	-0.00971139518439074	0.992251549512983	NA
ENSMUSG00000028053.13	700.390372700559	0.686937600490114	0.262077524673016	2.62112365929577	0.00876404659347147	0.110769641531019
ENSMUSG00000028369.15	2717.46290048492	1.49894911545843	0.30284084870668	4.94962658392976	7.43560043523434e-07	0.000172403370091433
ENSMUSG00000063663.11	141.492602244659	0.805153174946735	0.399440692884772	2.01570142774362	0.0438312062400804	0.250386945417442
ENSMUSG00000005089.15	59.0906687783421	-2.02548985292886	0.740746942599166	-2.73438840776276	0.00624962752761836	0.0935752762515201
ENSMUSG00000090315.2	0	NA	NA	NA	NA	NA
ENSMUSG00000025571.13	872.191210667951	0.271215934709425	0.247047275534313	1.09783009799578	0.272278686125523	0.579734605924007
ENSMUSG00000026361.9	335.63322051491	0.780197890081437	0.309340283046507	2.52213479084501	0.011664500231737	0.129174512229524
ENSMUSG00000040724.5	0.832833820185516	2.32168339574003	3.10942796977895	0.746659327151121	0.455269226939284	NA
ENSMUSG00000023473.13	28.7067025334206	0.00733403728676211	0.629139067502131	0.0116572593653744	0.990699063384912	0.995988969151346
ENSMUSG00000040125.4	0	NA	NA	NA	NA	NA
ENSMUSG00000035284.10	338.356569269356	1.12926423588675	0.271807437146324	4.15464803959293	3.25788632660247e-05	0.00308535600846127
ENSMUSG00000040274.11	1634.65215019762	0.448893855392173	0.225782819312815	1.98816657865471	0.0467932699427545	0.257267332048309
ENSMUSG00000020124.10	1092.49794723226	0.863146203950136	0.323248143481044	2.67022787711928	0.00757997848305584	0.103208241748645
ENSMUSG00000032332.17	27693.8137732811	1.61740016987843	0.251530577373029	6.43023280418017	1.27408657646696e-10	1.90376847559197e-07
ENSMUSG00000115744.1	0	NA	NA	NA	NA	NA
ENSMUSG00000040225.15	1078.05633459985	1.19788490830802	0.256137642764569	4.67672340300667	2.91495009412027e-06	0.000529733092780127
ENSMUSG00000022263.10	3176.02934306451	0.285181306630456	0.239357801697868	1.19144354020443	0.23347950880004	0.539675564514083
ENSMUSG00000059136.4	0	NA	NA	NA	NA	NA
ENSMUSG00000023011.8	0.710915012877579	-0.339269264124174	3.24166474054354	-0.104658961144541	0.916646427320447	NA
ENSMUSG00000046449.15	59.6032385977924	0.938845109060068	0.657014745928714	1.42895591747028	0.153016904021429	0.450398457173876
ENSMUSG00000035566.7	31.4542286638007	1.60633768480401	0.598330397811161	2.68470010997333	0.00725949110956108	0.100577771754187
ENSMUSG00000023033.14	5.56728094792869	-1.48791422234356	1.19964306142882	-1.24029744361743	0.214865397609364	NA
ENSMUSG00000005533.10	5839.55722132163	0.906574818595709	0.176072216973839	5.1488805796681	2.62045645048701e-07	7.47640358189166e-05
ENSMUSG00000025609.15	904.166163315169	0.386263878181459	0.257640545788594	1.49923559973517	0.133812522647876	0.423913028166933
ENSMUSG00000015647.9	2955.4472003535	1.02126688756803	0.362760905708502	2.81526170956434	0.00487375260684381	0.0815201804189497
ENSMUSG00000034342.9	993.126902558641	0.994046974859631	0.299609870814581	3.31780449074328	0.000907279659851172	0.0307509524747734
ENSMUSG00000070733.13	1053.26869564231	0.826378608140642	0.218610092299847	3.78014848009476	0.000156734861312263	0.00900756587575774
ENSMUSG00000030760.14	1322.78672717734	-0.0655729227887587	0.233689755371585	-0.280598191754245	0.779018603106739	0.907749473609783
ENSMUSG00000045962.16	3398.31238757074	1.07440647070547	0.209063439712768	5.13914088556848	2.75997414469846e-07	7.47640358189166e-05
ENSMUSG00000069729.14	1047.0836224823	0.349684855479586	0.214226034484268	1.63231726863369	0.102612667248543	0.373077620945185
ENSMUSG00000030465.19	540.316555654911	1.05827501896494	0.35629430556167	2.97022714774141	0.0029757962479339	0.0617071740085936
ENSMUSG00000052512.17	776.191849064031	1.12388627714215	0.36618084698414	3.06921098249256	0.00214624960321446	0.0516328527084581
ENSMUSG00000055670.14	2673.36236563507	0.851056349863574	0.226488045715179	3.75762149907826	0.00017153608440598	0.00970268764390602
ENSMUSG00000046994.9	506.706756139817	0.165079233136459	0.227450050313355	0.725782354890806	0.467972205682969	0.739409503163548
ENSMUSG00000072780.3	0	NA	NA	NA	NA	NA
ENSMUSG00000041592.16	24.0107505493588	0.923675351015094	0.720861989305801	1.28134839222776	0.200071322440868	NA
ENSMUSG00000079620.13	0.119844130619689	-0.0443040953327121	4.56207316163209	-0.00971139518439074	0.992251549512983	NA
ENSMUSG00000063108.15	616.481968139077	0.36268389493823	0.341457754438518	1.062163299043	0.288161557953963	0.596000712298506
ENSMUSG00000026979.16	46.7762708351578	0.132921826850962	0.467584358687529	0.284273467196514	0.776200817838037	0.906893883430575
ENSMUSG00000042807.15	130.698830385486	0.131608358666138	0.351640887012086	0.374269214778811	0.708204033497561	0.874878545147455
ENSMUSG00000026726.10	107.166010802925	1.11784903289409	0.394547366175222	2.83324418999579	0.0046078171772178	0.0792403138097505
ENSMUSG00000025949.16	966.246709555335	0.544882349835254	0.292751996542653	1.86124213078037	0.0627099912190033	0.299157134414032
ENSMUSG00000022995.16	3630.799426479	0.0727010452659604	0.349949256845811	0.207747391496799	0.835426211795161	0.934435135288337
ENSMUSG00000041991.18	0	NA	NA	NA	NA	NA
ENSMUSG00000063810.7	107.83981172254	0.622167922523112	0.401432999162509	1.54986740955804	0.121173343367299	0.404510033792917
ENSMUSG00000050556.9	10.1830588283601	1.78703931605098	1.04846861747475	1.70442804511888	0.0883011481838984	NA
ENSMUSG00000090100.7	158.77167029916	0.638731466497646	0.427533100639726	1.49399301607735	0.135177444690258	0.426128991137972
ENSMUSG00000091631.2	0	NA	NA	NA	NA	NA
ENSMUSG00000045678.8	0	NA	NA	NA	NA	NA
ENSMUSG00000036099.16	1204.93923716872	-0.103668161811808	0.175406099413616	-0.591017998566591	0.554508361429787	0.796650033384226
ENSMUSG00000026605.14	399.219705150381	-0.151778419802207	0.283293644650448	-0.535763589011974	0.592121949562917	0.81597510261483
ENSMUSG00000035623.14	293.730360476465	0.780411016442964	0.373525191451284	2.08931294141307	0.0366795621918658	0.229640015063413
ENSMUSG00000012819.15	72.5146542512582	-0.659242474858864	0.38701529938768	-1.7034015861954	0.0884929410756378	0.348956392755392
ENSMUSG00000048960.13	278.361322268722	1.35990739203682	0.397390371432076	3.42209446881193	0.000621407189695096	0.0241775689586417
ENSMUSG00000024598.9	2733.93315221004	0.848553579444685	0.35712219721384	2.37608747388105	0.0174973142692045	0.158134329497488
ENSMUSG00000026640.12	1195.18501240968	1.04574076533455	0.245318708104277	4.26278441385742	2.01895281743099e-05	0.00220738841372455
ENSMUSG00000037110.20	231.537046285576	0.453915570626426	0.319171565007199	1.42216795100838	0.154977500242606	0.45312987656046
ENSMUSG00000028370.7	5805.13845412865	1.22578158913123	0.282131088294345	4.34472356996112	1.39451155403499e-05	0.00170485376169659
ENSMUSG00000063760.9	1385.33338059002	-0.13371675765149	0.184059732710304	-0.72648566681312	0.467541091133042	0.739409503163548
ENSMUSG00000006301.17	8932.22869259907	0.209054239880718	0.20529364443259	1.0183181289344	0.308526795686315	0.612987667817919
ENSMUSG00000056476.13	24.8489950932183	0.390900021744056	0.619323536310846	0.631172559777962	0.5279277017531	0.779915602897473
ENSMUSG00000040423.10	1180.24320697877	0.711456720439286	0.247708124052317	2.8721573955686	0.00407679862232784	0.0736892310121839
ENSMUSG00000034243.17	1345.33847571418	1.03120585417817	0.277254596638922	3.71934628561324	0.000199739058620337	0.0109190685379117
ENSMUSG00000032625.14	1323.00191997519	0.783448093881047	0.352611930926023	2.22184227239155	0.0262939668051863	0.193427148660286
ENSMUSG00000027799.12	919.237188113558	0.59674967589621	0.242414330736995	2.46169306114022	0.0138282951896955	0.140711092183888
ENSMUSG00000025813.14	73.7616217925649	-0.243476291549585	0.454504797575356	-0.535695756895101	0.592168836602181	0.81597510261483
ENSMUSG00000020102.15	93.6819977278189	1.10083328785874	0.360558588066403	3.05313290070906	0.00226465617452825	0.0530576589460904
ENSMUSG00000034239.14	0.119844130619689	-0.0443040953327121	4.56207316163209	-0.00971139518439074	0.992251549512983	NA
ENSMUSG00000037652.15	539.117920326361	0.872526750940058	0.264542315020261	3.29825022841141	0.000972893923771308	0.0321148054211163
ENSMUSG00000043535.13	1021.25494640294	0.78038817871157	0.370134141986417	2.10839285055797	0.0349970223509743	0.224114265036144
ENSMUSG00000063455.16	161.682833054246	0.683507017848174	0.37663526059359	1.81477171513614	0.0695589988328472	0.314588829623788
ENSMUSG00000042284.10	475.804250897747	1.3181879230077	0.293793257247015	4.4867875299786	7.23051161338902e-06	0.00105691217583539
ENSMUSG00000033253.18	368.092422798572	0.621910401747534	0.356040517501895	1.74674052860915	0.0806823567776834	0.335154971383719
ENSMUSG00000070695.4	1.20148013718876	0.105825070401924	2.39109586006429	0.0442579790168171	0.964698766718025	NA
ENSMUSG00000030180.15	978.727161228444	0.548879589002979	0.320433642594086	1.71292747090942	0.0867258836880193	0.345772215783126
ENSMUSG00000019849.11	3791.76908451468	0.242659884140321	0.197479640253853	1.22878431330132	0.219152684481999	0.527220984063312
ENSMUSG00000091572.9	2.41207419952169	-0.638717815485707	1.80203957742973	-0.354441613539208	0.723007952993697	NA
ENSMUSG00000089774.2	2382.6469094152	0.841591645631534	0.282550831943687	2.9785495227254	0.00289616223845256	0.0607896251823665
ENSMUSG00000034832.15	479.797487445473	0.377393347274262	0.302343560141237	1.24822684200043	0.211947996729401	0.519744102847736
ENSMUSG00000028664.14	701.129871518763	-0.0851593979889191	0.406143988433096	-0.209677849270807	0.833919114946742	0.933518093920825
ENSMUSG00000056602.11	138.09733350553	0.833941992739222	0.384300719293942	2.17002454294487	0.0300049867285644	0.207662277894104
ENSMUSG00000115705.1	0	NA	NA	NA	NA	NA
ENSMUSG00000035161.7	602.880261922853	0.476725825318317	0.273836981327509	1.74091104498466	0.081699172368678	0.337021616568706
ENSMUSG00000071847.13	321.392176860925	-0.292733245559469	0.284174648449922	-1.03011738434878	0.302954905463194	0.608807168061721
ENSMUSG00000016028.10	170.407742851117	-3.01773741539702	1.24137538653262	-2.43096282408667	0.015058759576312	0.146746520856699
ENSMUSG00000032238.17	210.897231688072	1.0073077078896	0.413224451039497	2.43767692196249	0.0147819787276906	0.14583679159331
ENSMUSG00000026384.13	202.099816116496	0.537372850465128	0.410252925650421	1.30985744858046	0.190244064315103	0.494777115658467
ENSMUSG00000046958.9	0	NA	NA	NA	NA	NA
ENSMUSG00000045071.14	207.091270935457	0.00568108227131766	0.270686879922936	0.0209876528664229	0.98325550509299	0.994139055826056
ENSMUSG00000044465.19	755.889922293282	0.279483989879958	0.249496281806403	1.1201930059095	0.262631523765962	0.571686636562383
ENSMUSG00000024298.15	886.599752152236	0.83948211206296	0.308254915055866	2.72333731292109	0.00646260363321059	0.0947821880969274
ENSMUSG00000046230.11	427.021125521636	0.972049982680573	0.351603434840629	2.76462026919951	0.00569890944069891	0.0888280764988037
ENSMUSG00000034647.15	403.58033448952	0.590877169391712	0.264483020157908	2.23408356815849	0.0254775749758526	0.190651532009053
ENSMUSG00000022521.10	866.085733110282	0.832041572101475	0.293443345035104	2.83544195559092	0.00457623300170001	0.0790002328714528
ENSMUSG00000116657.1	102.999785772153	-0.498701953652529	0.325171198833454	-1.53365967048008	0.125113400254839	0.410572231973421
ENSMUSG00000022231.10	125.674367878881	0.0990867961024114	0.365764093123964	0.270903563157659	0.786465204467004	0.910501383408426
ENSMUSG00000026207.16	1665.13136566384	-0.365710172775218	0.216534740671695	-1.6889214711726	0.0912344799885884	0.35347775479301
ENSMUSG00000048148.18	6.5003400706557	1.86017584042727	1.26438729400469	1.4712073185547	0.141235058574454	NA
ENSMUSG00000022894.6	6685.56973259402	1.80293455350621	0.257504455541977	7.00156643779821	2.53116348362674e-12	8.5097716319531e-09
ENSMUSG00000019841.15	244.131580217458	0.452923550656152	0.339417176082011	1.3344155292445	0.182067713440163	0.48464897275204
ENSMUSG00000102692.1	84.8785523986639	-2.78299857836107	1.51212175197544	-1.84045932460489	0.0657008306989379	0.304986113648366
ENSMUSG00000033209.17	1076.67812775395	0.884401699298207	0.286240572003257	3.08971468687586	0.0020034885307276	0.0499868529892854
ENSMUSG00000031467.10	1224.11839408705	-0.0337893875815812	0.19405005484686	-0.174127173569969	0.861765517990966	0.946220853807258
ENSMUSG00000056268.15	480.857121047797	0.435972485012785	0.269836080675625	1.61569380907543	0.106160530173031	0.380401494742051
ENSMUSG00000022197.16	80.2295652639151	0.469001266954731	0.541794081701475	0.86564486913895	0.386684941794157	0.678434615867396
ENSMUSG00000032253.13	595.915530822478	0.45981964301018	0.370826845058294	1.2399847776336	0.214981024568415	0.523080300053563
ENSMUSG00000036862.15	330.139815198983	-0.0908532503276498	0.393430005725904	-0.230926083433874	0.817372226679711	0.925914716479988
ENSMUSG00000059495.14	2720.15210140526	0.411060794530001	0.201714694709685	2.0378326681733	0.0415666701086169	0.244442822720701
ENSMUSG00000037974.16	0	NA	NA	NA	NA	NA
ENSMUSG00000026604.17	3573.55728247953	0.771318812803859	0.308015842019254	2.50415305832109	0.0122744921650268	0.131737725965906
ENSMUSG00000039741.15	375.153491188505	0.701543521684573	0.408464213879106	1.71751526289696	0.0858850681322313	0.344359688802101
ENSMUSG00000041147.10	81.7324087745796	0.285330621913074	0.490318624208647	0.581928990304182	0.560614512342794	0.800248801824212
ENSMUSG00000041482.17	981.649311447165	0.465176034644373	0.442715827423456	1.05073278575025	0.293381333647831	0.60024222955972
ENSMUSG00000049313.8	66.9396871276427	1.2020331988907	0.506248056887862	2.37439567922521	0.0175777025254108	0.158328830248978
ENSMUSG00000035236.17	237.848637247625	0.537685757407782	0.335864444389121	1.60090109682714	0.109398826636522	0.385944617542096
ENSMUSG00000029505.17	1332.46607618872	0.373962616812571	0.248504223321232	1.50485417034206	0.132361573143948	0.421401144801092
ENSMUSG00000024383.9	1000.79946614413	0.878111360005638	0.310386761840426	2.82908766726684	0.00466809097998701	0.0794639082264117
ENSMUSG00000044647.16	4.62972083609235	0.0710313150898307	1.2962156322131	0.0547989958804578	0.956298600373588	NA
ENSMUSG00000039262.16	2818.34200310087	0.849239937348628	0.340137877642581	2.49675203254198	0.0125336566810204	0.133771916703462
ENSMUSG00000053877.12	107.968854839232	0.113570202687154	0.353308426625777	0.321447761016601	0.747871093882438	0.893613968123159
ENSMUSG00000034751.16	992.257671642477	0.629954993138075	0.274707448254608	2.29318497601933	0.0218373577388206	0.176985678880606
ENSMUSG00000041268.17	211.762791046874	0.989221577615702	0.467056062691372	2.11799322744125	0.0341756412594337	0.22138440445899
ENSMUSG00000068740.13	24.4525927303464	0.77656628852667	0.690997641994154	1.1238334855754	0.261083672981846	0.570253895445811
ENSMUSG00000028514.15	1360.93230197012	0.832305552985668	0.295589947880001	2.81574376583183	0.00486644627223735	0.0814993393138827
ENSMUSG00000090362.2	212.892233345583	0.163596787982819	0.59305041802193	0.275856458424702	0.78265831784886	0.908813002373335
ENSMUSG00000073678.4	181.138476924456	0.899499354999426	0.387752320356056	2.31977813613972	0.0203528824182856	0.17032082312452
ENSMUSG00000046876.16	1616.94962766328	0.327488179326942	0.218899085394094	1.49606919890666	0.134635623428618	0.425318267293412
ENSMUSG00000024421.16	8.55836358220711	0.673460770624368	1.06787433298977	0.63065545244341	0.528265832573231	NA
ENSMUSG00000034297.14	1148.43793077654	0.894394793374686	0.294282909535445	3.03923457460231	0.0023718009848674	0.054523042127345
ENSMUSG00000061755.10	552.350994068874	1.16409114281749	0.36756904569522	3.16699993225961	0.00154020354286981	0.0431129911597193
ENSMUSG00000031393.16	719.203079336143	0.237339104790953	0.231456134351304	1.02541721547427	0.305166368549787	0.610423519895514
ENSMUSG00000037996.17	3.41783543399216	-0.184728750929359	1.42736445020834	-0.129419470200758	0.897025742246759	NA
ENSMUSG00000062296.8	12.3261262406566	0.736964941797781	1.0127373353835	0.727696033363588	0.466799679046112	NA
ENSMUSG00000057133.14	450.033364275643	0.667854463731188	0.252367379127661	2.64635812298605	0.00813636278234811	0.107694691630923
ENSMUSG00000021986.8	57.9415976087041	0.150192962480578	0.506975250825261	0.296253046349092	0.767036840832649	0.902538405417574
ENSMUSG00000027878.11	3396.78253663236	0.8848514172665	0.257133118362052	3.44121917434455	0.000579099246210042	0.0231867052922674
ENSMUSG00000056215.13	7.39239517565538	-0.462552443943654	1.10486657787629	-0.41865004626418	0.67547190843976	NA
ENSMUSG00000039801.7	372.726994587526	0.685343735240912	0.291852492860332	2.34825383372308	0.0188616623806184	0.164388616781954
ENSMUSG00000038143.16	619.82899141857	0.850793152508674	0.242111620389394	3.51405335745688	0.000441324154892778	0.0195227869572305
ENSMUSG00000060206.11	800.208486267409	0.883515758911283	0.299631822480306	2.94867131133695	0.00319143204582896	0.0643453945311963
ENSMUSG00000055204.15	1741.46280086982	0.898536315482795	0.262173822828322	3.42725412396027	0.000609718185889895	0.0238357272204863
ENSMUSG00000022723.16	834.272456641515	1.14488655109914	0.337894916112825	3.38829173362543	0.000703294167443166	0.0264187149826137
ENSMUSG00000053617.12	8835.1626703795	0.107437520320376	0.225394375555886	0.476664602013271	0.633600973126064	0.8380237375897
ENSMUSG00000003452.15	66.6777059232371	0.807849089441662	0.534351615232761	1.51183053707018	0.130576978747871	0.419959660430073
ENSMUSG00000061751.16	1944.90830075047	0.380789898968406	0.170618332776758	2.23182288076066	0.0256266714612254	0.191035187256408
ENSMUSG00000075595.9	673.95134702737	0.18526357527258	0.240427723857323	0.770558287955681	0.440968793315521	0.720731263758753
ENSMUSG00000115020.1	0	NA	NA	NA	NA	NA
ENSMUSG00000015653.13	2058.55677875024	0.0225223065443196	0.236664012691285	0.0951657427261604	0.924183179801115	0.971653146897459
ENSMUSG00000040721.9	25.7492898493216	1.40646276379313	0.817785121146497	1.71984391428072	0.0854608177103908	0.343880388894885
ENSMUSG00000021061.15	3.81108171131712	1.76681683938228	1.64454561695381	1.07434954747862	0.282666045913326	NA
ENSMUSG00000021466.12	454.641183578936	0.163817820114461	0.256337083375862	0.639071873476293	0.522776176362295	0.776570641745294
ENSMUSG00000033981.14	2.33619942742309	-0.271920013612108	1.72299935765592	-0.157817826457026	0.87460035121221	NA
ENSMUSG00000071531.3	9.78492001553887	0.158420724373254	0.938098072941249	0.16887437352531	0.865895456632582	NA
ENSMUSG00000039683.16	113.490615032795	-0.205668028574112	0.439907549268703	-0.467525571943497	0.640123900884655	0.841155581307098
ENSMUSG00000026749.11	1692.29336737426	-0.241007604488614	0.186448133213703	-1.29262546282711	0.196140628588651	0.5016546749165
ENSMUSG00000017485.11	1720.32765816356	0.898723943247458	0.336555035482476	2.67036249200394	0.0075769399086464	0.103208241748645
ENSMUSG00000060534.16	27.9588580657902	1.94352888349443	0.63117515412194	3.07922273366127	0.00207541454185058	0.0507457722887392
ENSMUSG00000026275.13	566.347526635786	0.507955539570778	0.266596225442192	1.90533657679606	0.0567363337768462	0.282903306129413
ENSMUSG00000053774.9	1249.01387350936	0.703346937056089	0.282435256893138	2.49029439452103	0.012763732201171	0.13465515016315
ENSMUSG00000091624.2	0	NA	NA	NA	NA	NA
ENSMUSG00000056910.5	0	NA	NA	NA	NA	NA
ENSMUSG00000051323.16	2594.17320718175	0.731860172087954	0.274118087705145	2.66987187242886	0.00758801961143417	0.103208241748645
ENSMUSG00000031229.16	614.031806697113	0.785836214636201	0.395121863626846	1.98884518164337	0.0467182940116936	0.257157980484505
ENSMUSG00000064302.13	2068.69974644391	0.444928843372175	0.172502495358582	2.5792603315523	0.00990121379425357	0.118042130412342
ENSMUSG00000003575.13	175.793873939979	0.33340352660098	0.359595605558051	0.927162405345795	0.353842218909441	0.652918518097442
ENSMUSG00000015243.4	714.05754208843	0.78770709165852	0.313768093790224	2.51047543471758	0.0120568710566986	0.130606115931173
ENSMUSG00000038822.15	536.449313669532	0.00500367407333744	0.277100430464359	0.0180572583916683	0.985593175248993	0.994882720539747
ENSMUSG00000032410.13	420.579754610671	0.926460883942008	0.324886511236258	2.8516446571347	0.00434936912961419	0.0766583434535409
ENSMUSG00000034799.16	55.9233898814633	-0.709198885768658	0.600244193286499	-1.18151727863555	0.237397293509861	0.544798430566657
ENSMUSG00000051339.10	3635.1522289657	0.441630790414469	0.204384833740984	2.16078063294141	0.0307122888003909	0.21018771490466
ENSMUSG00000063077.14	3024.70006125584	0.840658175121483	0.231213667727124	3.63584983269077	0.000277065706555356	0.0142212962662459
ENSMUSG00000024294.14	2572.7627498434	0.554709434676596	0.293764036684177	1.88828231303534	0.0589880604692908	0.289515123062417
ENSMUSG00000041235.12	70.2279440128311	0.585192913186605	0.491831487993505	1.18982400979242	0.234115570656365	0.540495483980566
ENSMUSG00000115697.2	0.127994757404053	-0.0443040953327121	4.56207316163209	-0.00971139518439074	0.992251549512983	NA
ENSMUSG00000020122.16	2605.27636854851	0.765529123691018	0.200749954180957	3.81334644291359	0.000137097720172187	0.00819811883911277
ENSMUSG00000063317.7	1299.11708801243	0.394280713444915	0.223490379484064	1.76419546270908	0.0776990763901542	0.329936567239169
ENSMUSG00000032875.8	3647.26485969839	0.273239791428274	0.219674005045884	1.24384217136298	0.213557656132771	0.521693616652771
ENSMUSG00000038095.15	1366.42188248981	0.644211943897072	0.315124485087814	2.04430939004169	0.0409229921834392	0.2429723615377
ENSMUSG00000051506.17	10.6894581998064	0.135087681025845	1.35544812252022	0.0996627453175214	0.920612078166601	NA
ENSMUSG00000090774.2	0	NA	NA	NA	NA	NA
ENSMUSG00000094410.7	31.0749119474752	0.716775837364317	0.573472331091145	1.24988739387044	0.211340685041927	0.51882247762757
ENSMUSG00000026596.13	3269.6573736555	0.372968828111676	0.19592899035171	1.90359184438282	0.0569633618077188	0.283930055444849
ENSMUSG00000078808.5	1.07044826068045	-0.761742596650322	2.87783118449848	-0.264693287345508	0.79124574903557	NA
ENSMUSG00000029361.18	0.747517937479093	-1.69574554649903	3.71709819276923	-0.456201439552423	0.648245130339381	NA
ENSMUSG00000027580.17	209.560601821264	0.307930818430463	0.37335842840919	0.824759252770851	0.409508284439968	0.698405449102115
ENSMUSG00000067158.9	32.7650935192521	0.388603805748052	0.565759315095813	0.686871246092062	0.492163868036126	0.757045649846778
ENSMUSG00000048126.16	2473.66085784855	0.326922913709985	0.413438658527307	0.790741037314953	0.429095123625074	0.713108158985418
ENSMUSG00000054823.16	739.212473712238	0.498488250855363	0.21170387295823	2.35464870760166	0.0185402236931467	0.162641179533879
ENSMUSG00000049001.5	359.65691879003	-0.155317789243457	0.411138611513356	-0.377774757451628	0.705597927174006	0.873035108254202
ENSMUSG00000049470.13	4804.16032616474	0.730438198812034	0.286821043067874	2.54666879040385	0.0108756601578123	0.124661897783777
ENSMUSG00000073514.4	29.9713132221226	-0.0151135799177514	0.758239947756395	-0.0199324500937624	0.984097258851498	0.994449950182969
ENSMUSG00000021928.9	730.266542400608	0.0453207954294555	0.20614535275207	0.219848736944182	0.825988961468306	0.929717518634682
ENSMUSG00000036334.12	236.496487861689	0.992793738955568	0.426428980634611	2.32815728771082	0.0199037532607446	0.168449133952481
ENSMUSG00000032743.15	585.760096598075	0.0880705446382771	0.209738601837708	0.419906225495031	0.674553959698072	0.858465188797168
ENSMUSG00000031004.8	467.071477535663	0.697760230267816	0.394153140568034	1.77027697727396	0.0766810113954771	0.327783293466744
ENSMUSG00000025153.9	10442.4166013803	0.636783376903786	0.298351979345862	2.13433602250582	0.0328152845512911	0.217336842702111
ENSMUSG00000046532.8	87.4140175433404	0.370112872035205	0.410397101843934	0.901840852121689	0.367141415128018	0.664309844375954
ENSMUSG00000070565.11	714.885332916264	0.275023791128202	0.328564272016837	0.837047161092758	0.402566059320785	0.69317648729141
ENSMUSG00000009487.10	0	NA	NA	NA	NA	NA
ENSMUSG00000045039.9	4274.06254254059	0.287742360138504	0.26543725684617	1.08403154687987	0.278350811701563	0.58736257896793
ENSMUSG00000040710.10	26.9347595440893	0.408753456577373	0.728686603068538	0.560945480342429	0.574834704314318	0.806929730574204
ENSMUSG00000026014.15	1350.42040303724	0.484788221795553	0.250219020655725	1.93745551607194	0.0526896860257218	0.273790918730258
ENSMUSG00000033257.14	797.568909629687	0.25107866281687	0.21411006678867	1.1726616435307	0.24093151872097	0.54925361311402
ENSMUSG00000026019.15	1169.66217302389	0.0853637202856161	0.192544897147035	0.443344495494102	0.657516576307337	0.850975850048184
ENSMUSG00000044447.5	2035.33519399027	0.543523022623705	0.247310673876839	2.19773378198136	0.0279680826933701	0.199848446365803
ENSMUSG00000039967.14	453.570755183743	0.668856231421351	0.360561952352602	1.85503830078904	0.0635907573839516	0.300951669417575
ENSMUSG00000055322.15	4996.71314895389	0.74140947750809	0.259921623240837	2.85243477731407	0.00433857147852966	0.0766448763648396
ENSMUSG00000055320.17	2284.38285131037	0.934777736732369	0.306636643627912	3.04848672250233	0.00229997076251002	0.0535121225159772
ENSMUSG00000069601.14	341.442670257897	0.266319668315777	0.332107873810062	0.801907119094954	0.422606687733952	0.708100515405705
ENSMUSG00000020181.16	112.824038159097	-0.235043589109616	0.439144614119191	-0.535230494813312	0.592490481818334	0.81612332269722
ENSMUSG00000031558.15	4254.17812760178	1.32416531691855	0.27700747544825	4.78025119999307	1.75076301547546e-06	0.000346239132825205
ENSMUSG00000117068.2	0	NA	NA	NA	NA	NA
ENSMUSG00000054280.14	564.088408375279	0.475859163166091	0.308529596172286	1.54234526952924	0.122989713713738	0.407180125559417
ENSMUSG00000024548.11	1052.46108134766	0.164286485490998	0.183018281317155	0.897650684448857	0.369371808644659	0.665324415035276
ENSMUSG00000041308.6	1344.03304375133	0.133797922010903	0.174069461540631	0.768646727729847	0.44210305773924	0.721799430269138
ENSMUSG00000049658.13	405.919448658347	0.755471751336089	0.374853325510738	2.01537961629861	0.0438648885463218	0.250386945417442
ENSMUSG00000021068.16	633.228663341037	0.406811858265121	0.38073513102262	1.06849046782854	0.285299327914835	0.593631384612061
ENSMUSG00000049336.16	1.60784075712195	0.708869939427504	2.43637360758858	0.290952888842494	0.771087350693733	NA
ENSMUSG00000020014.17	3.22060507526655	1.79136343360789	1.71257840399387	1.04600375050292	0.295559300802607	NA
ENSMUSG00000005268.20	9.9083101240529	0.641802331095337	0.967366048510485	0.663453438420297	0.507040190667725	NA
ENSMUSG00000028399.18	1860.081122282	1.39900052688819	0.246090938691859	5.6848924804986	1.30894984325791e-08	8.00125340551469e-06
ENSMUSG00000091670.2	0	NA	NA	NA	NA	NA
ENSMUSG00000020961.15	24.0298286371767	0.429532578022899	0.683262599210531	0.628649334120144	0.529578654746153	NA
ENSMUSG00000028080.16	248.351553577485	0.24838347653654	0.347043944570739	0.715711887276312	0.474169269194161	0.744759207208955
ENSMUSG00000115791.1	0	NA	NA	NA	NA	NA
ENSMUSG00000032186.15	194.72327574496	0.306609251548821	0.390224131520334	0.785726014314529	0.432028019278531	0.714714331806826
ENSMUSG00000021188.14	817.727688106703	1.0962325049012	0.327401984038508	3.34827691444982	0.00081315717400073	0.0290833448828772
ENSMUSG00000030102.11	933.397092657252	0.911030196701495	0.233626462570622	3.89951629056621	9.63850524663898e-05	0.00641676329489114
ENSMUSG00000033952.14	192.594722636938	0.833673687045519	0.470644192827031	1.77134595465392	0.0765031899599025	0.327231201838667
ENSMUSG00000024026.13	3340.70342231155	-0.0647351493997636	0.278998005679306	-0.232027283643645	0.816516822710652	0.925711482891249
ENSMUSG00000038679.16	462.204831836737	0.583575717647565	0.298483855455643	1.95513327431637	0.050567341753922	0.268362119931627
ENSMUSG00000025326.12	1672.34242207026	0.736991787031014	0.351359331209201	2.09754437001762	0.0359454137156123	0.227801095027123
ENSMUSG00000041415.10	1119.58235002824	0.635973564733302	0.291074402142201	2.1849175332931	0.0288948937033011	0.204085362669114
ENSMUSG00000015501.10	348.178785131486	0.0109537039726302	0.360675531240217	0.030369966975483	0.97577199668422	0.991108013997499
ENSMUSG00000022914.17	1202.31507019455	0.325101635469569	0.225202207934016	1.44359879262295	0.14885186475985	0.444026325222428
ENSMUSG00000075316.11	14.7798240676555	0.236636284112569	0.8338386191783	0.283791465962275	0.776570194944946	NA
ENSMUSG00000034912.17	4.96877245142361	0.440244592933628	1.21631028068451	0.361950893554783	0.717388727104302	NA
ENSMUSG00000030313.15	283.033666392688	0.674807857307854	0.322042763578062	2.09539829372469	0.0361356010867313	0.228121125366333
ENSMUSG00000022558.16	3692.85669326106	0.369342763414895	0.275092004379866	1.34261540697083	0.179396538899119	0.481886666805864
ENSMUSG00000022811.17	1103.31263343402	0.609085206205424	0.261971535933093	2.32500528744842	0.020071677473746	0.168807954138171
ENSMUSG00000039419.17	1.54582436569515	1.09373919550897	2.16726982403572	0.504662217587792	0.613796102329417	NA
ENSMUSG00000038738.15	4.19717254168772	-0.257006080088419	1.53538267810768	-0.16738894072009	0.867064026437437	NA
ENSMUSG00000037697.19	558.474248143406	-0.300687550752113	0.265390820072187	-1.13299906406079	0.257214646355366	0.565981583372192
ENSMUSG00000034218.16	350.698364958572	0.962795836386756	0.418388317751872	2.30120152866636	0.0213802425356846	0.175259300957367
ENSMUSG00000111389.1	0.245764211335494	-2.77885501626042	4.47934995754493	-0.620370152499422	0.535014118373206	NA
ENSMUSG00000108218.2	59.7706193917608	0.166004041725328	0.551350665268369	0.301086136614211	0.763348812205248	0.901032305391236
ENSMUSG00000050600.5	0	NA	NA	NA	NA	NA
ENSMUSG00000027806.9	3975.05544088754	0.712696566539079	0.203137446379414	3.50844504172768	0.000450734350593079	0.0197442200220708
ENSMUSG00000023087.15	1336.89972253996	0.0721846877011395	0.256243053701989	0.281703978540197	0.778170503560646	0.907749473609783
ENSMUSG00000031292.14	39.8255398048655	0.142494765397483	0.503493956689647	0.28301186837346	0.777167739139212	0.907561380546348
ENSMUSG00000070458.5	0	NA	NA	NA	NA	NA
ENSMUSG00000016756.17	18.8505408661819	1.22002276051325	0.815926960711862	1.49525977110602	0.134846659723922	NA
ENSMUSG00000031196.13	31.7970314668301	0.947909186074855	0.606576265140869	1.56272053581707	0.118118341995901	0.399611437273175
ENSMUSG00000022416.15	14.794209565667	0.340204258348996	0.822384287555117	0.413680396740551	0.67910818549043	NA
ENSMUSG00000066900.11	3239.19532005308	-0.507779887821031	0.16957861418946	-2.99436276353644	0.00275018745369675	0.0594606444972892
ENSMUSG00000027009.18	110.39622009036	0.519677484047471	0.422394916560034	1.23031188035998	0.218580337152265	0.52665928777221
ENSMUSG00000055026.13	2.62442239721616	1.04470282802619	1.76840920761795	0.590758532315832	0.554682223244204	NA
ENSMUSG00000114854.1	0	NA	NA	NA	NA	NA
ENSMUSG00000045210.8	577.218286498005	0.943357859349731	0.277326577914315	3.40161360099138	0.000669892801360292	0.0256787454916481
ENSMUSG00000056812.14	0	NA	NA	NA	NA	NA
ENSMUSG00000029238.11	647.426361041003	0.78667353165166	0.306203385922825	2.56912094319535	0.0101956866963228	0.120378924224889
ENSMUSG00000090066.2	4.27626353838559	-0.139356267255886	1.3359092414538	-0.104315669756302	0.916918843088394	NA
ENSMUSG00000026442.14	6.31773551054565	1.33610211473119	1.18311429675743	1.12930941532282	0.258767330453423	NA
ENSMUSG00000004113.18	59.3706974262781	0.334229682776373	0.547967341700962	0.609944530159189	0.541898553038829	0.789154774318846
ENSMUSG00000075324.13	18.5759251931422	0.501624828916064	0.768854483965119	0.65243142802406	0.514122895496307	NA
ENSMUSG00000002413.15	602.496757722113	0.565247382031905	0.282237591345026	2.00273599040501	0.0452056335726736	0.253831048135831
ENSMUSG00000066372.6	0	NA	NA	NA	NA	NA
ENSMUSG00000101599.1	12.284593193589	0.227665698657048	0.885683920216894	0.257050730469732	0.797139611172089	NA
ENSMUSG00000024594.9	1835.46508312426	0.146387461855035	0.218597995118085	0.669665162189419	0.503071264622501	0.764432270535501
ENSMUSG00000039087.17	377.284976070575	0.467248656405432	0.2797803014396	1.67005559005127	0.0949083655724317	0.360544548084198
ENSMUSG00000029229.8	1000.51936084983	-0.340123659407096	0.191688254972019	-1.77435836878344	0.0760038914482359	0.326195568621307
ENSMUSG00000059049.14	6.31981018723389	1.88263149945092	1.26027033261956	1.49383148259766	0.135219670606862	NA
ENSMUSG00000034377.10	5372.56801828306	0.202775699912544	0.181270649765316	1.11863503647761	0.263295869968969	0.572482273135439
ENSMUSG00000020661.15	722.778642092806	0.384050475511515	0.275832133731733	1.39233406316985	0.163821261136928	0.46511923127903
ENSMUSG00000047747.10	919.785348252792	-0.151949570955269	0.225127657696032	-0.674948482609062	0.499708496281726	0.762518989900902
ENSMUSG00000073608.4	0.127994757404053	-0.0443040953327121	4.56207316163209	-0.00971139518439074	0.992251549512983	NA
ENSMUSG00000027677.17	413.860852228687	0.469643208355604	0.378345496759076	1.24130777920866	0.214492072019771	0.522639262849863
ENSMUSG00000039840.8	1030.43278659121	0.386024717803839	0.230355682592771	1.67577683979372	0.0937819122576095	0.358799190907634
ENSMUSG00000015968.17	2.94471311116073	-0.524134771963533	1.7808492323013	-0.294317319207432	0.768515439621399	NA
ENSMUSG00000070855.8	0	NA	NA	NA	NA	NA
ENSMUSG00000054263.12	359.11711823008	1.01526803962927	0.248158840670541	4.09120238024141	4.29142425147086e-05	0.00365259957808735
ENSMUSG00000038121.6	1060.77191574578	0.390241944744616	0.251817098797948	1.54970391846876	0.121212597209729	0.404510033792917
ENSMUSG00000051118.9	0.122882105667747	-2.22469946248955	4.49871564905916	-0.494518799594462	0.620939832792723	NA
ENSMUSG00000078632.3	0	NA	NA	NA	NA	NA
ENSMUSG00000059921.15	1530.03626979626	1.04453986357698	0.308166589540406	3.38952988101268	0.000700125780568721	0.0263733655380621
ENSMUSG00000026219.14	4298.00818640635	0.793126546768882	0.283505080373649	2.79757437053182	0.00514879122547448	0.0839284174547646
ENSMUSG00000041258.18	1071.74697817394	-0.077614829450797	0.192949004580087	-0.402255661384258	0.687495881997583	0.863642024432243
ENSMUSG00000033400.14	1101.26897888886	0.606597189196833	0.224634252200295	2.7003770941217	0.00692609225940071	0.0980826668506215
ENSMUSG00000043909.16	827.051689034738	0.469131795824457	0.256861396356559	1.82640055095409	0.0677899489473738	0.310559497784184
ENSMUSG00000094921.2	0.127994757404053	-0.0443040953327121	4.56207316163209	-0.00971139518439074	0.992251549512983	NA
ENSMUSG00000019899.16	1294.8828640626	1.49267282257111	0.314431636658608	4.74720940435064	2.06242395821132e-06	0.000387785538143413
ENSMUSG00000024384.4	1028.45563154808	0.395372731117355	0.319297892833311	1.23825662489968	0.215620921418085	0.523478020422205
ENSMUSG00000003226.7	1612.16485953259	0.933690540180844	0.31976855688514	2.91989478038712	0.00350149586216083	0.0676553395895673
ENSMUSG00000095448.3	0	NA	NA	NA	NA	NA
ENSMUSG00000054889.10	283.210845559206	1.55049430458747	0.389797155765104	3.97769527472338	6.95864699453508e-05	0.00523928915152113
ENSMUSG00000042567.20	16.9545742673061	-0.902899691417484	0.719879999027611	-1.25423639028323	0.209756096604479	NA
ENSMUSG00000055024.12	494.6746482302	0.89132888980855	0.338035772532413	2.63678865444066	0.0083694958559946	0.108120057897613
ENSMUSG00000042599.8	132.288773399451	1.25020686508444	0.359027800651054	3.4822007176529	0.000497310776753659	0.020871052640261
ENSMUSG00000064115.13	28.0958110227236	1.12297321328223	0.625303352470403	1.79588548317496	0.0725127316625158	0.318815330857692
ENSMUSG00000035877.17	658.72348734532	0.359752620729829	0.241227791849524	1.49133985753284	0.135872289534246	0.427617727511476
ENSMUSG00000057182.14	21.5924620905458	2.76250122894277	0.921298817059821	2.99848559206757	0.00271324984954369	NA
ENSMUSG00000032666.16	492.1555509315	-0.354454755524417	0.263359154605767	-1.34589874445419	0.178335173812107	0.481576589844421
ENSMUSG00000021578.17	2469.67747500634	0.301922035645218	0.211447034777922	1.42788493564036	0.153324980279772	0.450790191255437
ENSMUSG00000078515.4	1158.88364335643	0.241340368713873	0.183671306770935	1.31397970078614	0.188853035468843	0.492890826350426
ENSMUSG00000092049.9	0	NA	NA	NA	NA	NA
ENSMUSG00000032827.15	13.5641734273647	0.375624709845006	0.815918000375143	0.46037066184629	0.645250189311402	NA
ENSMUSG00000055088.5	0	NA	NA	NA	NA	NA
ENSMUSG00000034551.12	83.7095750396252	0.519092564404383	0.420280449572846	1.23510994844505	0.216789587376806	0.524538749737906
ENSMUSG00000048038.8	0.127994757404053	-0.0443040953327121	4.56207316163209	-0.00971139518439074	0.992251549512983	NA
ENSMUSG00000032796.8	84.3413286021702	1.8826627239646	0.519842486761585	3.62160225820104	0.000292784030505498	0.0147466653267338
ENSMUSG00000028565.18	168.766532913509	0.62578593089031	0.366433972583471	1.70777268951983	0.0876785284424526	0.34722588686414
ENSMUSG00000090581.9	0	NA	NA	NA	NA	NA
ENSMUSG00000118318.1	0	NA	NA	NA	NA	NA
ENSMUSG00000073530.11	228.413750908762	2.40804112194729	0.421842643988815	5.70838713501695	1.14051768748617e-08	7.30365802919717e-06
ENSMUSG00000029516.19	186.930196350961	0.247942130715384	0.441025454651727	0.562194603735925	0.573983437639528	0.806473655580288
ENSMUSG00000020532.18	1481.42449448138	0.376390144157327	0.256024245807852	1.47013476387627	0.141525258672725	0.43532289081217
ENSMUSG00000048271.14	555.82629563016	0.554491280654454	0.248684992143363	2.22969337986748	0.0257678056864469	0.19155635758504
ENSMUSG00000111465.1	1.35392591900209	1.69810106276268	2.63438309848712	0.644591541654617	0.519191917655599	NA
ENSMUSG00000026020.9	1465.97711528184	0.537750499645952	0.342554806401143	1.56982325046179	0.116456236888917	0.397137298442554
ENSMUSG00000026923.15	550.217565568135	0.579574181512028	0.321199697691112	1.80440450497991	0.0711679173509378	0.316594823862194
ENSMUSG00000005045.16	50.7441244475873	0.509079395253581	0.423228817519578	1.20284672068681	0.229035641243072	0.537065615246178
ENSMUSG00000051166.10	29.0259037652882	-0.495183956051985	0.627704322282641	-0.788880908532305	0.430181615051798	0.7136790475224
ENSMUSG00000025757.12	617.801388225065	0.902268201303796	0.262727803948148	3.43423188465378	0.000594235613299152	0.0235037662577853
ENSMUSG00000074212.7	994.98304427108	0.185540025720267	0.222502823987947	0.833877172409813	0.404350202026058	0.693784760859806
ENSMUSG00000008206.16	1096.61917560482	-0.101084780157895	0.222458475749594	-0.454398421176269	0.649542088521544	0.846582865520229
ENSMUSG00000021301.9	666.064127225249	0.859760172596492	0.430083659876606	1.99905333032918	0.0456025839347866	0.254632569957933
ENSMUSG00000030643.14	584.497639916936	0.37193061880711	0.350910704460393	1.05990103487735	0.28918962480951	0.596841938986845
ENSMUSG00000021510.11	141.072536401837	0.963862373363317	0.430325442918728	2.23984518978431	0.025100974976112	0.189358408211378
ENSMUSG00000020589.17	186.808319350398	0.452978371197824	0.304987543046588	1.48523564822656	0.137481411873459	0.428768559108134
ENSMUSG00000032423.12	1883.6195371944	0.322820898779713	0.286693108953357	1.12601555007112	0.260158937400493	0.569343757552779
ENSMUSG00000024998.17	117.898722240467	0.491018059115669	0.383570460940326	1.28012479874476	0.200501248337304	0.507116943321435
ENSMUSG00000056073.16	14.3061325468688	0.711394486143479	0.756384211571329	0.940520009884413	0.346950890653633	NA
ENSMUSG00000090417.4	0	NA	NA	NA	NA	NA
ENSMUSG00000022141.7	449.957829949774	1.36798097869328	0.393936223839071	3.47259504434941	0.000515452463988079	0.0214606957761972
ENSMUSG00000027784.10	1298.05421140088	0.74874177605842	0.215457763899927	3.47512088915109	0.000510623181692577	0.0213256538739185
ENSMUSG00000115021.1	0	NA	NA	NA	NA	NA
ENSMUSG00000073077.6	2.37487702871285	-0.242103129175171	1.95068715532197	-0.124111715461217	0.901226822285029	NA
ENSMUSG00000026516.8	953.939000049036	0.197404746151526	0.225667483882643	0.874759370535567	0.381704848385428	0.674883881289408
ENSMUSG00000090304.4	0	NA	NA	NA	NA	NA
ENSMUSG00000066440.5	914.155539580334	0.295053894022559	0.226995245454984	1.29982411495518	0.193661258408217	0.498674665276278
ENSMUSG00000072501.5	615.693924898847	0.459171051306789	0.339617701250801	1.35202331802988	0.17636785593716	0.478666988222589
ENSMUSG00000032740.16	446.534989267322	0.625404236881236	0.381156690229806	1.64080613803255	0.100837663730239	0.370195666007099
ENSMUSG00000030201.15	1693.74823267527	0.990477227806339	0.23336148451693	4.24439032797839	2.19188534410306e-05	0.00233940270694428
ENSMUSG00000022016.16	1132.53701907399	1.09569061780158	0.389491354094695	2.81313206643142	0.00490614966413191	0.0818584375722654
ENSMUSG00000005534.10	1053.74628440439	0.787200307729369	0.182677123399269	4.30924405355793	1.63813517819542e-05	0.00189910705830794
ENSMUSG00000039477.16	1972.45262236	0.670528173417693	0.333270749023979	2.01196227206081	0.0442239141796105	0.251362298346324
ENSMUSG00000001151.10	589.303277736211	0.135932599541169	0.265864049643642	0.511286124330725	0.6091507196688	0.824742978759403
ENSMUSG00000034427.17	3.46143745224837	0.0202420433856814	1.52131669624592	0.0133056078564258	0.989383974162306	NA
ENSMUSG00000021427.10	10984.2736060636	0.180006817173123	0.2005670758034	0.897489363356776	0.369457846675095	0.665390266785413
ENSMUSG00000079259.2	126.034390215668	-0.236973635173714	0.372478309449969	-0.636207878852459	0.524640938510803	0.777537066463883
ENSMUSG00000117286.1	0	NA	NA	NA	NA	NA
ENSMUSG00000102758.3	72.5086475668964	1.56883826977057	0.545333565791857	2.87684156667034	0.00401677213581514	0.073053140274297
ENSMUSG00000053852.11	0.225462540302707	-0.0443040953327121	4.56207316163209	-0.00971139518439074	0.992251549512983	NA
ENSMUSG00000060371.12	0.471226751638201	-1.81767190379817	4.42385801355256	-0.410879349705552	0.681161005202645	NA
ENSMUSG00000035133.9	1334.4293745438	0.727937375708906	0.379342619762403	1.91894434684096	0.0549913774546461	0.278540129570652
ENSMUSG00000045350.15	1.83122862073641	0.0619509047864534	2.01790685508071	0.0307005770015958	0.975508330999911	NA
ENSMUSG00000050310.9	2567.90007637051	0.384724422961737	0.384928205079392	0.999470597075077	0.317566775698043	0.620739635643092
ENSMUSG00000024109.18	6.68901145158704	2.48824844920598	1.40944561099254	1.76540934236813	0.0774949943937497	NA
ENSMUSG00000040661.6	1395.97959947665	0.254214460505015	0.228757953978577	1.11128140501214	0.266447240811599	0.575270665320757
ENSMUSG00000034602.15	2476.91482439348	0.333951958027362	0.222490859072244	1.50096934058278	0.133363491711438	0.423320863614027
ENSMUSG00000018076.12	1285.62750485966	0.186896603745806	0.248356604901594	0.752533252819508	0.451730440350356	0.727703756807809
ENSMUSG00000036192.15	13.131433474415	0.916278486296436	0.93117825164341	0.983999019177394	0.325115995156515	NA
ENSMUSG00000091345.9	6.85258783564006	3.47076285486321	1.98387106298238	1.74949013553611	0.0802063324637236	NA
ENSMUSG00000033849.3	0.750735018022172	-3.52940682707226	4.46208448542903	-0.790977140526489	0.428957331164584	NA
ENSMUSG00000074224.3	0	NA	NA	NA	NA	NA
ENSMUSG00000043279.9	631.043486965871	0.421260559195078	0.235434137405568	1.78929259723027	0.0735677056423506	0.320277923430991
ENSMUSG00000025997.13	429.348886479984	0.728810410306216	0.405608424508933	1.796832526811	0.0723622108952	0.318815330857692
ENSMUSG00000016200.14	176.394242102116	0.38322211535561	0.387615538344441	0.988665513752117	0.32282682101367	0.625480263990356
ENSMUSG00000090112.8	388.005036642959	0.850927426862281	0.341005412179521	2.49534874365663	0.0125833390077515	0.134195672463316
ENSMUSG00000026380.10	12.6772167670117	0.78962155573403	0.84396050722609	0.93561434329355	0.349471786913985	NA
ENSMUSG00000067010.4	0	NA	NA	NA	NA	NA
ENSMUSG00000041642.18	288.407468835057	-0.600700457262359	0.3830252212358	-1.56830522889393	0.116809916220471	0.397812487409948
ENSMUSG00000062200.14	0	NA	NA	NA	NA	NA
ENSMUSG00000025650.13	2031.79384206222	-0.126473120354245	0.392416072804012	-0.322293425573856	0.747230413276687	0.893302035536038
ENSMUSG00000031026.15	37.4927875599627	-0.648730569994805	0.593479768651257	-1.09309635182529	0.274351497601716	0.582468165953188
ENSMUSG00000040537.17	108.014978142601	0.116182878771841	0.383398132958305	0.303034544992102	0.761863535480258	0.900187235302889
ENSMUSG00000037487.7	2355.26802368572	0.701860001996202	0.30043078461168	2.33617870719669	0.019481929565742	0.167087365306185
ENSMUSG00000048012.19	22.0772504070876	0.0497954931597764	0.604933795469931	0.082315607976727	0.934395743170009	NA
ENSMUSG00000027737.10	122.464873834606	0.195487040857628	0.497290292357223	0.393104478132869	0.694242316739301	0.866797147555359
ENSMUSG00000063626.6	33.72601980905	0.101589566398905	0.597521608776554	0.170018230147214	0.864995799791092	0.947269015927574
ENSMUSG00000001569.10	953.408755167582	0.169769004209293	0.243603314692158	0.696907611556232	0.485860614012142	0.75322356223432
ENSMUSG00000070337.4	2.35746439681568	-2.00494897566244	1.84005893026566	-1.0896112850978	0.27588440985025	NA
ENSMUSG00000049553.11	1500.12984228478	0.313419851716296	0.188071365327996	1.66649426492807	0.0956150095371144	0.361391413225158
ENSMUSG00000021745.14	2205.77680289396	0.843859756207019	0.217900950213708	3.87267588957	0.000107646937380706	0.00695978852834486
ENSMUSG00000071226.11	0.373758968739547	-1.81707620778233	4.47934967001792	-0.405656254064009	0.684995189305669	NA
ENSMUSG00000051586.16	342.865867309888	0.465892728008454	0.305623215286054	1.52440228590748	0.127408249433248	0.415106166666073
ENSMUSG00000050315.14	320.276143428603	1.60865000962407	0.254074196203216	6.33141827727134	2.429178236578e-10	2.96978081140918e-07
ENSMUSG00000034973.16	409.710665079482	0.742104383331089	0.339712848390459	2.18450490420701	0.0289251673083467	0.20419194223761
ENSMUSG00000040943.12	155.013981498287	0.487363327049733	0.357537110155718	1.36311256428031	0.172847037610836	0.474473762357731
ENSMUSG00000037926.15	248.05761978648	0.466695178323382	0.255340743274659	1.82773486259252	0.067589353249411	0.310324896721775
ENSMUSG00000020135.13	182.592559180143	0.217911012121269	0.364678971254876	0.59754202818832	0.550145555735549	0.794684161371107
ENSMUSG00000031529.5	1757.76818466434	0.907452171305138	0.22683690644039	4.00046088418864	6.32192368405022e-05	0.00497176781889517
ENSMUSG00000097767.8	0.865436327322972	2.37137005622933	3.64570118969181	0.650456505578229	0.515397387999316	NA
ENSMUSG00000026834.13	1.71156359561174	0.544995210737302	2.3089872506478	0.236032143782691	0.813407727606545	NA
ENSMUSG00000026490.18	2019.14836614307	1.0055801580882	0.360859422369618	2.78662574884415	0.00532599495275421	0.085777221706154
ENSMUSG00000090751.2	0	NA	NA	NA	NA	NA
ENSMUSG00000036030.9	12.8028600162104	-0.58422570755855	0.839512370906483	-0.695910778453114	0.486484706827244	NA
ENSMUSG00000047793.13	132.655654153756	1.08466636638943	0.440815214327059	2.46059194677585	0.0138708024841298	0.140780793816285
ENSMUSG00000058230.12	4721.46796498669	0.254440165762333	0.207054561484635	1.22885564045502	0.219125935766006	0.527220984063312
ENSMUSG00000040929.17	62.704073433922	0.832533359163086	0.457400222738493	1.82014200644381	0.068737382015173	0.313000411017778
ENSMUSG00000055980.2	2516.18032562823	0.800359086778357	0.228498119629882	3.5026944119924	0.000460577535169508	0.0201098918602582
ENSMUSG00000050296.14	4.51362854900171	1.92084438968763	1.62930581120766	1.17893422859879	0.238424366733865	NA
ENSMUSG00000027787.14	937.211812914987	0.483892957105099	0.226960600234866	2.13205709098562	0.0330021535110832	0.217838115056777
ENSMUSG00000052372.10	4.52577873730632	1.89858640388059	1.48848417250025	1.27551668936559	0.202126420798645	NA
ENSMUSG00000090961.2	0	NA	NA	NA	NA	NA
ENSMUSG00000032009.8	636.707280963265	0.134912961111589	0.331395116119781	0.407106063273502	0.683930090341133	0.862049851746537
ENSMUSG00000026872.17	1581.69814976047	0.804718561087603	0.296813264440657	2.71119473923812	0.00670412394530827	0.0962188461222045
ENSMUSG00000117853.1	0	NA	NA	NA	NA	NA
ENSMUSG00000008575.17	465.66999539793	0.823990495715083	0.343851197306764	2.39635779130345	0.0165589176632072	0.153631247251713
ENSMUSG00000022656.15	2795.86174129412	0.476986896489552	0.306077464661893	1.558386198136	0.119141726401858	0.401764508012637
ENSMUSG00000031540.13	484.696670603547	0.707198031390564	0.246565973211009	2.8681898892243	0.00412827680483385	0.0743052510095702
ENSMUSG00000035523.8	0	NA	NA	NA	NA	NA
ENSMUSG00000020315.18	6392.85128372805	1.08219170363355	0.204751938623969	5.28537952268678	1.25444409593327e-07	4.68604561169739e-05
ENSMUSG00000044021.14	0.225462540302707	-0.0443040953327121	4.56207316163209	-0.00971139518439074	0.992251549512983	NA
ENSMUSG00000052613.16	4.5544804650023	-1.08476662102113	1.30101899664377	-0.833782307421713	0.404403667031315	NA
ENSMUSG00000091259.2	0	NA	NA	NA	NA	NA
ENSMUSG00000051111.16	10.903972453213	-0.435276302967442	0.928054677691271	-0.469020105636752	0.639055264855449	NA
ENSMUSG00000025278.9	17701.2442396248	0.707603513283748	0.170128535101481	4.15922886105887	3.1932382697721e-05	0.00308535600846127
ENSMUSG00000034755.18	53.9052040186981	0.62264345851307	0.53974313796178	1.15359217138794	0.248667409437858	0.556949158008864
ENSMUSG00000031965.15	169.800688344625	1.39390117363265	0.561063978140569	2.48438899651373	0.0129773960450941	0.136024958701813
ENSMUSG00000078671.11	644.555655937865	0.311114341822273	0.325494516864351	0.955820530617199	0.339162913964531	0.641139002951225
ENSMUSG00000027288.16	2387.55296225424	0.405877115146432	0.276156078265003	1.4697381194592	0.14163269434684	0.435553732809582
ENSMUSG00000092060.4	124.636460616495	-0.0574429311052082	0.36857591147701	-0.155851018247543	0.876150455176937	0.951758185689573
ENSMUSG00000064325.4	74.441719404127	0.363734436604942	0.507511932676595	0.716701250129475	0.473558454361987	0.74420507700223
ENSMUSG00000031285.14	1.10001193682604	1.34546636698916	2.46076073371709	0.54676846413945	0.584537811328904	NA
ENSMUSG00000039716.12	22.4641621751628	0.997878653074999	0.684467320632563	1.45789086344223	0.144870627396797	NA
ENSMUSG00000090411.2	0	NA	NA	NA	NA	NA
ENSMUSG00000037795.14	163.95255240204	0.97802182674008	0.441288408030622	2.21628714677729	0.0266718427355388	0.19430278499866
ENSMUSG00000068699.12	11503.2686778383	0.643329449546248	0.155225086318882	4.14449406859819	3.40564770736132e-05	0.00318049655337465
ENSMUSG00000018501.17	1283.11850842251	0.598355703759825	0.248374521785643	2.4090864854336	0.0159925076980227	0.150953989951734
ENSMUSG00000074994.5	382.766597484221	1.01395918831066	0.29256678614317	3.46573581258972	0.000528782590450629	0.0217463861662999
ENSMUSG00000030084.11	13279.8512710137	0.969457772165239	0.247913645089145	3.91046556480035	9.21183929612836e-05	0.00622516657559469
ENSMUSG00000030016.14	683.844997736042	0.833555224695813	0.346243585464393	2.40742430961666	0.0160654920401122	0.15105332214766
ENSMUSG00000037470.14	5500.78370408226	0.640270900664522	0.20776282474622	3.08173948562071	0.00205794858962697	0.0505016623511752
ENSMUSG00000094672.2	0.127994757404053	-0.0443040953327121	4.56207316163209	-0.00971139518439074	0.992251549512983	NA
ENSMUSG00000030852.17	891.699081272622	0.783932358538718	0.300687199681435	2.60713578552482	0.00913031454620339	0.113610832902491
ENSMUSG00000054414.4	2101.65054743943	3.16243116698798e-06	0.199607240483942	1.58432688078887e-05	0.999987358900426	0.999987358900426
ENSMUSG00000030657.11	164.389292404523	0.109461726630223	0.400088486902168	0.273593792907589	0.784396804603253	0.909359330026254
ENSMUSG00000058656.13	75.4288109854063	1.33430459914913	0.410133294925618	3.2533437681306	0.00114055424168421	0.036005101976923
ENSMUSG00000035247.16	2472.65717430043	0.787939710601479	0.310297321204777	2.53930555230764	0.0111072769374228	0.126157652241944
ENSMUSG00000078606.8	13.497470351744	-0.0641470132022369	1.07908542876745	-0.0594457227316161	0.952597095952066	NA
ENSMUSG00000045868.12	19.450341558398	0.640452808542938	0.758658025264613	0.844191700627636	0.398562291499119	NA
ENSMUSG00000074899.5	0.93030160308417	2.4628152768951	3.50959227256388	0.701738289130641	0.482842389953077	NA
ENSMUSG00000030283.7	6.237938291013	0.742090937221778	1.38572785832485	0.53552429704261	0.592287360989425	NA
ENSMUSG00000042644.9	4258.81563973887	0.441864367793638	0.279819207804036	1.57910663553549	0.114311599945697	0.394610886438141
ENSMUSG00000042272.17	760.407276680816	0.247302211975402	0.224927182811845	1.09947676792037	0.271560161996192	0.579228475068893
ENSMUSG00000051985.12	0.493603099359236	-1.08128123525031	3.63924567104517	-0.297116856895174	0.766377295235896	NA
ENSMUSG00000037541.21	225.333884258033	0.998914958892931	0.283209743326696	3.52712073800595	0.000420105144322406	0.0188948962570158
ENSMUSG00000029655.17	1031.1935240682	0.437416947794596	0.264242746927691	1.6553602809552	0.0978514378241048	0.365529482182934
ENSMUSG00000001985.9	10.7580149799315	2.22732436462373	1.10285228326835	2.01960353024156	0.0434245286857894	NA
ENSMUSG00000044033.16	58.5561696260053	0.0684670269732161	0.435808268595718	0.157103551967552	0.875163238281043	0.951457838777904
ENSMUSG00000006262.15	810.537477768967	0.717062905303014	0.255768775621967	2.80355920522078	0.00505419517832522	0.08307347907506
ENSMUSG00000031561.16	2077.84783907699	0.755437419447604	0.324640967630333	2.3269934936487	0.0199656115422863	0.168654236193886
ENSMUSG00000013076.17	6216.99536076351	0.130677800441115	0.18668586085412	0.699987668285333	0.483935005732205	0.75184357175216
ENSMUSG00000040260.8	219.447531288096	0.768927875398163	0.359977626118069	2.13604351939907	0.0326758667523487	0.217105400988727
ENSMUSG00000032525.15	880.473263015218	0.469748665857546	0.358291347044223	1.31108012999143	0.189830693076523	0.494162439119837
ENSMUSG00000075376.10	2312.85767723983	0.638445808280162	0.280269517085272	2.27797091499578	0.0227283105439007	0.180751224242683
ENSMUSG00000041498.13	128.297274098467	0.0393316020376168	0.403436711014727	0.0974913808381237	0.922336178720426	0.971001795164576
ENSMUSG00000014355.10	4372.52748696692	0.305557366883226	0.222127105008276	1.37559694424434	0.168946453285036	0.469516822437934
ENSMUSG00000075318.12	80.376797629051	0.410703654323414	0.367649549301766	1.11710637236851	0.26394884619247	0.57305929941029
ENSMUSG00000029202.12	1390.21460073853	0.592142312423927	0.343567011985234	1.7235132936726	0.0847957432763303	0.343056203680933
ENSMUSG00000104597.1	1.30502387018353	-0.730456464417517	2.65296369774473	-0.275336019500936	0.783058093905993	NA
ENSMUSG00000015599.9	43.5512350951657	0.387337308330467	0.496573414075532	0.780020229338235	0.435378968073424	0.717345793022716
ENSMUSG00000027665.13	1556.50289607827	0.484583752450458	0.280871305805731	1.72528749798895	0.0844756738682399	0.342383623321305
ENSMUSG00000023026.16	1645.72197172053	0.459392468972598	0.196970539914226	2.33229024590504	0.019685427317669	0.167927862462899
ENSMUSG00000047789.5	322.557144825111	-0.320201171439585	0.33185784817102	-0.964874488291664	0.334607680943486	0.636668555763004
ENSMUSG00000069072.9	0.496641074407294	-2.18221490062276	4.29564035700936	-0.508006890535413	0.611448510907505	NA
ENSMUSG00000024913.16	1996.11257184689	0.409522368621341	0.263639451424491	1.55334251535048	0.120341328277679	0.403281348250779
ENSMUSG00000030257.16	430.206157610147	0.0235141818806705	0.26768642780477	0.0878422640755619	0.930002045703417	0.973733458033575
ENSMUSG00000023830.14	13073.5794169178	1.0164198288618	0.242789042403841	4.18643205145623	2.83373712707498e-05	0.00278161291130689
ENSMUSG00000053825.15	3.17014548188085	2.094967537129	1.90724140657375	1.09842809091089	0.272017601705701	NA
ENSMUSG00000040270.16	66.0800428582215	0.339072076628573	0.455355943938132	0.744630834718261	0.456494922087666	0.731235021030914
ENSMUSG00000030302.16	0.122882105667747	-2.22469946248955	4.49871564905916	-0.494518799594462	0.620939832792723	NA
ENSMUSG00000033014.12	470.346005802367	0.715200059850398	0.353439981677231	2.02354033761674	0.043017469147039	0.247963534114608
ENSMUSG00000021198.16	0.941490204916592	1.0428373232765	2.60354784390251	0.400544712753719	0.688755357619606	NA
ENSMUSG00000109446.1	0	NA	NA	NA	NA	NA
ENSMUSG00000060012.9	524.308634489724	0.694897554022417	0.257844199711151	2.6950288383484	0.00703825392183646	0.0988000404393076
ENSMUSG00000039218.17	2082.80657177685	0.946547090000099	0.29244486822103	3.23666848988678	0.00120933810876033	0.0372155123263363
ENSMUSG00000029478.16	967.573087126999	0.534324236887418	0.426306467394165	1.25338055543356	0.210067244468562	0.517206939511757
ENSMUSG00000047412.16	444.746629800652	0.277495775177556	0.226085829153305	1.22739127974886	0.219675562358165	0.527492277464239
ENSMUSG00000038384.16	112.358699663416	0.700791668026453	0.584781287577301	1.19838251139973	0.2307681376759	0.538563550212971
ENSMUSG00000002107.18	904.585379675344	0.495182527533826	0.259856524370601	1.90559974868135	0.0567021547717231	0.282903306129413
ENSMUSG00000057503.6	0.870579148641861	-2.45674688284707	3.69721983098589	-0.664484936020684	0.50637998718943	NA
ENSMUSG00000021027.17	438.986509440878	0.664708891444182	0.336985519027414	1.97251470437846	0.0485508793849788	0.261793194053406
ENSMUSG00000073557.11	811.033142807866	0.775861140858209	0.294202855410785	2.63716387040126	0.00836024340458993	0.108120057897613
ENSMUSG00000001930.17	9.81183495315283	-0.0146090326471197	0.935406596438331	-0.0156178422332548	0.987539271375006	NA
ENSMUSG00000030729.17	176.646375955461	0.685086335187207	0.343200895889485	1.99616709452826	0.0459157378607916	0.255658945841449
ENSMUSG00000038172.14	1685.02857553733	0.490929246609052	0.222312710430576	2.20828240390852	0.0272245931580603	0.196836735908384
ENSMUSG00000036242.15	125.230279147836	0.0824861350538762	0.326429822907368	0.252691786305577	0.800506395528013	0.917503335096533
ENSMUSG00000028358.15	632.627709668765	-0.0450686139925638	0.276646259878382	-0.162910620994394	0.870588808204499	0.94960485787445
ENSMUSG00000019790.17	490.83346143387	0.335692954294661	0.249237300576864	1.34688087825415	0.178018600936567	0.480914854438521
ENSMUSG00000004356.8	1683.66053154555	0.665281403651941	0.27317156743391	2.43539768761951	0.0148754306914955	0.145847057890753
ENSMUSG00000027782.10	1576.85321862173	0.863396398153698	0.241934659631282	3.56871727047935	0.000358733291672592	0.0168092170955157
ENSMUSG00000032946.16	23.8272268393021	1.06373534491589	0.730455112826683	1.45626380901011	0.145319706097139	NA
ENSMUSG00000079022.10	21.9124224096966	0.511066556102856	0.718551575507863	0.71124547426069	0.476932133557704	NA
ENSMUSG00000059493.13	113.800419855379	0.881774105350415	0.367535948325771	2.3991506391882	0.0164331527175682	0.15283059318524
ENSMUSG00000063894.15	276.883901356492	0.60476100739313	0.336677519529264	1.79626191923564	0.0724528711839172	0.318815330857692
ENSMUSG00000009575.14	4856.29384456006	0.279920148166995	0.305250701668648	0.917017214495548	0.359133619547401	0.657808351358411
ENSMUSG00000056724.15	78.8032633649323	-0.496270983406289	0.474200227656512	-1.04654311504415	0.295310349757397	0.602721745870007
ENSMUSG00000026502.13	2418.30126396852	-0.0437365178760914	0.20298712973893	-0.215464487489146	0.829405196692995	0.931408829107484
ENSMUSG00000026924.17	3859.92220773098	0.436953771123392	0.211972161451067	2.06137338097702	0.039267432357467	0.238560769084144
ENSMUSG00000032289.15	412.353974745139	1.54733125314087	0.415437136404987	3.72458578578411	0.000195636178689465	0.010738429922514
ENSMUSG00000062151.13	62.4900596231693	0.371276121778973	0.600802334042992	0.617967176126858	0.536596975790738	0.785423931332687
ENSMUSG00000061080.11	3.09694961789646	1.76844257766378	1.83355807769649	0.964486808012917	0.334801919144574	NA
ENSMUSG00000042010.16	25.8639437292173	0.398402921983152	0.704640302397263	0.565398999500515	0.571802404934873	0.806152301084657
ENSMUSG00000029108.14	2568.31290716016	0.989922399493251	0.186573071372635	5.30581606557849	1.12170022682779e-07	4.30989275725145e-05
ENSMUSG00000042589.18	7.23668365690773	-0.566425228192965	1.49293922115802	-0.379402738012072	0.704388817648254	NA
ENSMUSG00000021149.8	1401.15144894004	0.406888549620622	0.268533559546462	1.51522420626992	0.129715634981162	0.418953892887202
ENSMUSG00000043719.14	2.70580904278614	-1.75536875739142	1.59208857371784	-1.10255722349184	0.27021949530937	NA
ENSMUSG00000021690.10	478.858927812373	0.920847660539902	0.27374060883764	3.36394247258386	0.000768375576425631	0.0280030210075119
ENSMUSG00000074582.10	2722.12474275106	0.46534055578406	0.197987075721183	2.35035824479463	0.0187553500816509	0.163731247737281
ENSMUSG00000004347.16	19.3380998969152	0.747793700463769	0.801928550920437	0.932494172461457	0.351081196945015	NA
ENSMUSG00000005417.17	24482.8305623805	-0.242357562358116	0.154283267880141	-1.5708609604147	0.11621494842946	0.396841023247455
ENSMUSG00000028403.15	481.84825176151	0.520749712661072	0.291545798992196	1.78616778036651	0.0740720961998654	0.321433220295512
ENSMUSG00000091455.4	0.721140316350191	2.10748087329256	3.19654593589219	0.659299417420805	0.509703516444485	NA
ENSMUSG00000030172.15	811.642408393758	0.456416908140744	0.194514801265331	2.34643793259805	0.0189538227339218	0.164871285980453
ENSMUSG00000048191.15	0.847060397065996	0.0233243832355062	2.65799588437994	0.00877517658043603	0.992998511945042	NA
ENSMUSG00000110670.1	0	NA	NA	NA	NA	NA
ENSMUSG00000021366.8	557.117133716111	0.809980515673647	0.215845443897653	3.75259491721175	0.00017501353380848	0.00980659167773518
ENSMUSG00000038520.15	1130.71258319811	-0.0410187966616216	0.197679766770721	-0.207501239665045	0.835618424628396	0.934435135288337
ENSMUSG00000011751.16	27.6064571292086	-0.252102664332411	0.543752161496919	-0.463635240802329	0.642909101420039	0.842558616481988
ENSMUSG00000027312.14	2864.02992959354	0.830003427579839	0.176108913633704	4.71301202451454	2.44081787793219e-06	0.000449645463320988
ENSMUSG00000075054.5	153.336697776766	0.355685398168106	0.39732845873886	0.895192353694143	0.370684271471391	0.665969272636291
ENSMUSG00000055254.15	16.9673250631486	0.946979450856175	0.906939849233679	1.04414802332958	0.296416910211366	NA
ENSMUSG00000022641.15	534.720073983249	0.541770020763432	0.355500376715954	1.52396468821834	0.127517532447374	0.41513444417964
ENSMUSG00000018199.9	1152.38574230897	0.658494027995621	0.357643841220011	1.84120052438017	0.0655921785497	0.304692095729314
ENSMUSG00000050272.10	20.1236251457795	-0.472890243986785	0.640688728154269	-0.738096712500489	0.460455681357284	NA
ENSMUSG00000036913.15	0.247838888023742	0.695409143274194	4.52942914800281	0.153531299541538	0.877979309434662	NA
ENSMUSG00000022961.18	3332.55819584776	0.633787501108777	0.236162212803979	2.68369564116017	0.00728133593184956	0.100636593639787
ENSMUSG00000038914.15	1236.18062586854	0.28357585052726	0.239462367147833	1.18421885620212	0.236326439765145	0.543268027685756
ENSMUSG00000046881.7	0	NA	NA	NA	NA	NA
ENSMUSG00000102657.1	19.2129958905344	0.218766918522876	0.82598644588626	0.264855337048716	0.791120905776101	NA
ENSMUSG00000042207.17	2118.60775524525	0.44861883116818	0.247564331917055	1.81213031656954	0.0699660630013409	0.314588829623788
ENSMUSG00000091805.2	0	NA	NA	NA	NA	NA
ENSMUSG00000117863.1	0	NA	NA	NA	NA	NA
ENSMUSG00000044043.4	17.69686821792	0.128815694860454	0.754953123280218	0.170627408362468	0.864516745199064	NA
ENSMUSG00000002265.16	2313.36502509182	1.35287695070234	0.355910082660428	3.80117624257672	0.00014401081981952	0.00849411186374081
ENSMUSG00000040596.15	1071.30917771899	-0.0516386082446713	0.206649982579963	-0.249884406473104	0.802676742588336	0.918593892802991
ENSMUSG00000034636.9	1509.50289398112	0.328584437198658	0.298846573287542	1.09950880006412	0.271546197664433	0.579228475068893
ENSMUSG00000012422.14	4278.03955478422	-0.195753704147356	0.252313580450135	-0.775834989928508	0.437846421420553	0.718857120652374
ENSMUSG00000038174.14	240.698860269899	0.358453864180719	0.425807347432215	0.841821697869554	0.399887764729984	0.690332562270709
ENSMUSG00000021196.14	1861.63224098219	0.0825672167328075	0.200202389387144	0.412418737786101	0.680032531420067	0.860619036434264
ENSMUSG00000021952.16	763.428085932596	0.343846464707675	0.329312817223388	1.04413325787568	0.296423740617023	0.60343724853432
ENSMUSG00000092080.2	0	NA	NA	NA	NA	NA
ENSMUSG00000031563.8	3792.87210855339	0.691519656078162	0.204656921227479	3.37892142582136	0.000727708036009378	0.0267926206223381
ENSMUSG00000021756.12	5621.2707414477	0.18992262829254	0.229941856227167	0.825959359503948	0.408827146110715	0.697792544853013
ENSMUSG00000051910.13	171.5976849936	0.989884124037035	0.479701752891897	2.06354076896632	0.0390612785102683	0.237613183611765
ENSMUSG00000044167.6	257.26347179675	1.00972938702456	0.349942088654794	2.88541852998031	0.00390893619007236	0.0717139529193952
ENSMUSG00000038766.16	511.645788363358	0.0541083818193559	0.278047739299146	0.19460104928651	0.845705281551005	0.93914489069347
ENSMUSG00000031284.16	664.497917235528	0.527508458652965	0.278185228409829	1.89624899089116	0.0579271278000941	0.286503867103959
ENSMUSG00000053646.13	476.834560406347	0.429919632091073	0.278036550721454	1.5462701971216	0.122039326465825	0.405791906608032
ENSMUSG00000053641.9	266.556840166594	0.727759545526693	0.37830438868795	1.92374068947689	0.0543870950494819	0.277364906096619
ENSMUSG00000027947.11	105.469257661363	0.580508258734299	0.422836056157941	1.37289204711876	0.169785909325019	0.470488544941862
ENSMUSG00000032280.16	1008.52855697647	0.287484440441071	0.215972341366967	1.33111693201768	0.183150538456479	0.485769168797995
ENSMUSG00000039512.12	1043.87618714498	0.101772007862373	0.226992417827166	0.448349812018228	0.653900756457247	0.849054491922088
ENSMUSG00000024077.15	1140.95381466253	0.643202084660238	0.253817782060996	2.53410962556464	0.0112733457679478	0.127398280577615
ENSMUSG00000034206.15	120.151504523791	0.0805451342029014	0.474026284508728	0.169917021133916	0.86507539484604	0.947279041599995
ENSMUSG00000024472.9	737.256193735709	0.36958505446237	0.31847662322884	1.16047781063292	0.245854322864471	0.554460663069161
ENSMUSG00000041936.18	1367.07373756462	1.10568388932885	0.343017612023325	3.22340267838396	0.00126677336404943	0.0385420095016669
ENSMUSG00000037876.17	600.867090366657	0.943303778082035	0.325311595743414	2.89969306481794	0.00373528231070897	0.0700586841205219
ENSMUSG00000049176.14	25.3289439656528	0.683802704629213	0.615510361654997	1.110952385579	0.266588844904741	0.575270665320757
ENSMUSG00000034158.9	5213.24729467634	0.555931050636892	0.237076430382127	2.34494441198067	0.0190299165476511	0.165319326700783
ENSMUSG00000039410.16	58.1929315370251	-0.389728238765831	0.396430206426137	-0.983094205356538	0.325561075973428	0.62832166327363
ENSMUSG00000020883.18	1728.57352326692	0.117861600482857	0.19895156416074	0.592413540351119	0.553573701442146	0.796330802625458
ENSMUSG00000052516.19	131.740229662784	0.510188161178014	0.42629642054336	1.19679203622617	0.231387623089769	0.538563550212971
ENSMUSG00000025078.9	1142.54626491419	0.172387361258283	0.217447780376754	0.792775906746903	0.427908396148013	0.712487121505263
ENSMUSG00000026674.9	3689.02204054063	0.567987063013394	0.222321738559956	2.55479768506856	0.010624953385559	0.122858446370591
ENSMUSG00000033618.7	35.8928233350319	1.30026967791274	0.595350300398123	2.18404135690067	0.0289592092236979	0.204222311948579
ENSMUSG00000047497.10	2770.71589193521	1.2338929691678	0.276395667950898	4.46422687560717	8.03583813961476e-06	0.00114963777980361
ENSMUSG00000054611.17	2153.29466266594	0.247865095136169	0.232439990913149	1.0663616624765	0.286260185021103	0.594812572336804
ENSMUSG00000053477.17	746.800151568173	0.326563539965045	0.279858347398331	1.16688868851297	0.243255324523068	0.551745252856504
ENSMUSG00000020745.15	4564.51240676896	0.398125568296832	0.248170501349294	1.60424210827732	0.108660696330377	0.384511969010567
ENSMUSG00000094520.4	0	NA	NA	NA	NA	NA
ENSMUSG00000034724.18	431.572374648224	0.359497459821759	0.288750504484339	1.24501067266969	0.213127827160392	0.521306478656411
ENSMUSG00000028991.15	1441.19700420881	0.374277452176268	0.218440973367452	1.71340315146223	0.0866383969256013	0.345585254727254
ENSMUSG00000051344.13	400.029613463834	0.245893431696977	0.231151546553426	1.06377584473632	0.287430256404348	0.595533828899859
ENSMUSG00000062866.16	357.253953402929	0.325984855409776	0.256698822955281	1.26991176530079	0.204116061787985	0.51107009218525
ENSMUSG00000041638.18	3218.58993657161	0.437377124897194	0.274110121199901	1.59562559376721	0.110572409834493	0.387808938858683
ENSMUSG00000079465.8	40.8929059420847	0.0292311976013754	0.571447752787436	0.05115287873439	0.959203699974614	0.985060813841818
ENSMUSG00000035954.10	138.154903469851	0.882970150440619	0.330770274778762	2.66943621530442	0.00759787026555312	0.103208241748645
ENSMUSG00000041245.13	142.920421321318	0.611029782614268	0.425785873006055	1.43506354097751	0.151268991739092	0.447942078418897
ENSMUSG00000062078.15	3185.62339423312	0.4198043252315	0.268440877673799	1.56386139424575	0.117850122497113	0.399105627635652
ENSMUSG00000022419.16	30.6120684340634	0.976940185099009	0.632178039205327	1.54535609355722	0.122260154313809	0.405921632459087
ENSMUSG00000036792.12	321.294682737614	0.783170935039885	0.260899883353456	3.00180638248457	0.00268382815057901	0.0586863755593277
ENSMUSG00000031302.16	1.72579017249222	-0.809905023005245	2.003201353024	-0.404305349426119	0.685988192229072	NA
ENSMUSG00000056492.6	154.419333752474	1.54586933138498	0.446659151415426	3.46095971947792	0.000538253343029601	0.0220150293611327
ENSMUSG00000090061.9	0	NA	NA	NA	NA	NA
ENSMUSG00000014592.20	116.963707408813	-0.385587567040862	0.313235204247056	-1.23098413528493	0.218328797907877	0.526366121592437
ENSMUSG00000110266.1	0	NA	NA	NA	NA	NA
ENSMUSG00000063160.12	2746.80492844916	-0.106352569347516	0.186612798578445	-0.569910371409009	0.568738490114161	0.804596412722105
ENSMUSG00000036202.16	281.268232424195	0.954227823477691	0.466082926496652	2.04733486088027	0.0406252172973581	0.242139168430091
ENSMUSG00000053754.14	1027.05690265961	0.798996651026591	0.269918394983648	2.9601415312024	0.00307497741742015	0.06289481261046
ENSMUSG00000025938.16	36.0772295786464	-0.567757944650358	0.599566634456048	-0.946947198230021	0.343665685594935	0.644659961110214
ENSMUSG00000087088.2	16.8755459196439	1.06624841925902	0.724323187696347	1.4720616947942	0.1410042182396	NA
ENSMUSG00000033237.19	608.077485734261	0.528124867577284	0.233922799127801	2.25768873126706	0.0239650722747979	0.185753482392785
ENSMUSG00000026491.13	2004.61792315175	0.642216654120762	0.321939184354739	1.99483842082769	0.0460605054675656	0.255959370879266
ENSMUSG00000050332.7	277.474826044731	0.222861233500357	0.266507458634305	0.836228879455722	0.403026154614096	0.693200203308991
ENSMUSG00000046699.14	8.4882551912735	0.0745974115354075	0.989643710561482	0.0753780484221782	0.939913924334111	NA
ENSMUSG00000047496.6	5.55206175904963	-0.181174393424164	1.22511168638903	-0.147883981058224	0.882434330458415	NA
ENSMUSG00000094002.3	0.615521906667173	1.90441706364047	3.97458278198155	0.479148924076758	0.631832686937101	NA
ENSMUSG00000035569.17	1773.85121354602	0.403296215249039	0.245868887600643	1.64028974623296	0.100944936588938	0.370195666007099
ENSMUSG00000042671.12	38.8212125564061	-0.493350147999419	0.784076509960113	-0.629211743665828	0.529210441537593	0.780867019727622
ENSMUSG00000069299.2	0.750735018022172	-3.52940682707226	4.46208448542903	-0.790977140526489	0.428957331164584	NA
ENSMUSG00000046130.7	0	NA	NA	NA	NA	NA
ENSMUSG00000006307.16	401.03120071039	0.272414059397434	0.352135435228039	0.773605925859242	0.439163866701569	0.719965339437121
ENSMUSG00000075415.13	563.46724500267	0.622428676263876	0.338903574957086	1.8365951918409	0.0662696776632944	0.306863170352518
ENSMUSG00000056211.13	233.975545749559	0.517254572638237	0.266198945855375	1.9431127759584	0.0520025337055708	0.271690005156377
ENSMUSG00000045559.6	0	NA	NA	NA	NA	NA
ENSMUSG00000031328.15	60745.7766751403	0.677876064616967	0.203227283069508	3.33555639960566	0.000851288839129598	0.0297759251259489
ENSMUSG00000053469.14	66.7715602283315	1.26570183145858	0.433015651906636	2.92299325875518	0.00346684022147741	0.0674506547510708
ENSMUSG00000009470.17	6108.55983939748	0.386978997387388	0.251420276277177	1.53917179281421	0.123762361901817	0.408430979841875
ENSMUSG00000115701.1	0	NA	NA	NA	NA	NA
ENSMUSG00000032511.17	10.6937675585168	0.960346921895477	0.983323006785557	0.976634244565081	0.328750259310065	NA
ENSMUSG00000040327.16	121.482548701974	0.540063935674609	0.42560742945055	1.26892506639703	0.204467791158369	0.511664096668728
ENSMUSG00000021700.10	20.9477342911511	0.806087968089161	0.913749704982586	0.882175899695117	0.377681692621193	NA
ENSMUSG00000040054.16	702.765779135077	0.382669030119985	0.224433127061551	1.70504700054835	0.0881856589938529	0.3479814384241
ENSMUSG00000034480.18	272.978612962263	0.82667892433411	0.321172326295883	2.57394195156317	0.0100547141054439	0.119237914717822
ENSMUSG00000036155.13	1599.87929813487	0.517378684733515	0.189031099491475	2.73700299117631	0.00620017292788948	0.0934752528410961
ENSMUSG00000042121.16	1131.01389873039	0.476832886519164	0.247032176135368	1.93024606745103	0.0535763560426016	0.275313273236877
ENSMUSG00000024241.7	398.625739046889	0.569797027464274	0.234863023956647	2.42608230902048	0.0152628082617979	0.147821225249772
ENSMUSG00000043557.16	214.151567996177	0.75189702627944	0.274898841308151	2.73517713898471	0.00623467147593576	0.0935752762515201
ENSMUSG00000054051.7	587.318583626931	0.469860580948929	0.283611568899101	1.65670456523616	0.0975792195827048	0.3647393281378
ENSMUSG00000042942.18	110.332878467227	0.453582495212247	0.418327097906067	1.0842771063186	0.278241952820234	0.587317184355126
ENSMUSG00000050965.14	825.308571645134	0.588618694605977	0.205037064679037	2.87079165675433	0.00409445288120324	0.0739089964381493
ENSMUSG00000026532.7	19.1354303424883	2.59810964359929	0.828089997618435	3.13747255862453	0.00170411225114265	NA
ENSMUSG00000026837.15	40065.4199792158	0.527634062628921	0.216487598098071	2.43724844870743	0.0147995071699712	0.14583679159331
ENSMUSG00000070847.13	0	NA	NA	NA	NA	NA
ENSMUSG00000009628.14	36.0661099728478	1.159779015687	0.632249788291765	1.83436837333	0.0665993310037253	0.307987552729745
ENSMUSG00000025321.14	48.9954393116243	0.617232940679201	0.553556207639964	1.11503210001152	0.26483666628258	0.573329602087595
ENSMUSG00000096373.3	0	NA	NA	NA	NA	NA
ENSMUSG00000058793.14	5721.73573649353	0.284654934782288	0.193437633626641	1.47155922787863	0.14113994251495	0.434878532451532
ENSMUSG00000028465.16	15914.3882072908	0.756050231921852	0.210619876285694	3.5896433197801	0.000331130735778661	0.0159370862498343
ENSMUSG00000052062.14	76.7738839228245	-0.197664883179341	0.372071711441783	-0.531254801428967	0.595242221943512	0.81773596901587
ENSMUSG00000036550.16	2351.64390928197	0.57180092647807	0.259443648793128	2.20395037279947	0.0275278344103556	0.19838923748685
ENSMUSG00000004317.14	3955.24384556352	0.483997313576529	0.344017213601589	1.40689853426071	0.159457478288871	0.45937964182278
ENSMUSG00000064329.13	3.18422312284889	-0.888513923913171	1.45899937748008	-0.608988555874352	0.54253202447123	NA
ENSMUSG00000030306.14	326.989980110917	0.995683074492508	0.359865957171098	2.76681651779335	0.00566066046170712	0.0886199789162252
ENSMUSG00000006906.10	139.108335629438	0.838319705025014	0.390108813876256	2.1489381300955	0.031639304717148	0.212955640558662
ENSMUSG00000027652.15	1444.88789468419	0.524097556559932	0.220563082758456	2.37617986657307	0.017492933383479	0.158134329497488
ENSMUSG00000020866.17	398.186642447358	0.551165924959408	0.421543373550738	1.30749517022847	0.191044594154231	0.495155903725766
ENSMUSG00000042810.14	381.877799278929	0.150701411602678	0.252732840510768	0.596287412819457	0.550983238393495	0.794954849017476
ENSMUSG00000013415.9	1884.87524716399	0.261643565520711	0.21280172920741	1.22951804242952	0.218877637404163	0.526747757303362
ENSMUSG00000038170.15	3883.50401161835	0.839534013974161	0.203076428114831	4.13407908425217	3.56380750833959e-05	0.00319530751247694
ENSMUSG00000030411.16	13.1786841039915	1.52953165188941	1.13653094290384	1.34578971337239	0.178370343806927	NA
ENSMUSG00000026600.12	6365.32259094313	0.182028848568105	0.194055225489921	0.938026008362038	0.348231044395653	0.64879621571526
ENSMUSG00000064225.6	6.97632467248307	0.101868233959299	1.51539674910377	0.0672221542111302	0.946404848503459	NA
ENSMUSG00000031012.17	1478.51950473352	0.20080285822791	0.294560310658154	0.681703715545531	0.495426317561372	0.758998988216602
ENSMUSG00000031543.18	47.8839179785347	0.014946802567991	0.461446785659825	0.0323911727906361	0.974160101888536	0.990870234020021
ENSMUSG00000025958.14	724.144501952256	0.226726873253788	0.255785290623882	0.886395275900275	0.37540456397485	0.669110745703616
ENSMUSG00000033964.12	923.066871884385	0.837219254953974	0.382565906924486	2.18843143050703	0.0286381909109097	0.203125733844891
ENSMUSG00000049372.11	0	NA	NA	NA	NA	NA
ENSMUSG00000038518.15	425.780694682161	-1.34899869807208	0.47900206819161	-2.81626904694795	0.00485849607875969	0.0814993393138827
ENSMUSG00000050321.3	1.28168422410268	0.786785206017099	2.70716317687143	0.290630876165492	0.771333643130752	NA
ENSMUSG00000044791.16	630.397809271384	0.757649909747386	0.306088436285164	2.47526472722259	0.0133137449320603	0.138244317823221
ENSMUSG00000000276.11	476.799508936261	0.178568532749652	0.273336346800351	0.653292307590843	0.513567850636431	0.771970628019671
ENSMUSG00000022788.16	153.405136360398	0.532897372617985	0.417231520568378	1.27722222878089	0.201523801327615	0.50798352019752
ENSMUSG00000045441.5	35.7039119390851	2.20018120973664	0.872201549963595	2.52256053641325	0.0116503895549477	0.129174512229524
ENSMUSG00000026867.18	2098.47025691168	0.398014917510458	0.195577366392929	2.03507657788384	0.0418431683111763	0.244769167158516
ENSMUSG00000033799.10	620.070251305243	0.824794357646366	0.379516562126987	2.17327632033721	0.0297595266056894	0.207143116455489
ENSMUSG00000020890.11	1.10097437924205	0.588540426145535	2.77368385565486	0.212187277560723	0.831960931799311	NA
ENSMUSG00000062519.13	206.332203800749	0.513593347962161	0.29489001020006	1.7416437661409	0.0815707980441711	0.336801993275411
ENSMUSG00000029313.18	2360.52312723034	0.688253411095005	0.191989318859709	3.5848526115035	0.000337268616716834	0.0161173032221808
ENSMUSG00000094483.2	2373.67792184169	0.493017510932517	0.295486632952806	1.66849344759112	0.0952178115870964	0.361091118724907
ENSMUSG00000026193.15	121285.582722135	1.38860100551237	0.274238224490954	5.06348452368344	4.1166181584388e-07	0.00010445336036733
ENSMUSG00000000794.9	15.0105823731338	1.16309064305287	0.921080394497365	1.26274606429721	0.206680453682059	NA
ENSMUSG00000031816.15	985.907688646077	-0.39572709958597	0.195006695099314	-2.02930006779732	0.0424277364188615	0.246103366183783
ENSMUSG00000063632.6	1467.68857527907	0.807053394912712	0.307307342667856	2.62620927930444	0.00863417134705719	0.109850838481765
ENSMUSG00000095864.2	0	NA	NA	NA	NA	NA
ENSMUSG00000094970.3	0	NA	NA	NA	NA	NA
ENSMUSG00000022812.14	1554.51093072659	0.728476475503629	0.207400477472051	3.51241465006654	0.000444054604719537	0.0195791682762896
ENSMUSG00000028906.16	596.087559291173	0.0706876419432708	0.294156237226287	0.240306452821847	0.810092692933481	0.922840028341335
ENSMUSG00000085438.1	1509.23750486704	0.303896348424727	0.265139253021997	1.14617637698298	0.251722180247514	0.560230234848918
ENSMUSG00000067889.5	3.58261222149274	-0.419838053415328	1.51544604077007	-0.277039262448426	0.781749958486722	NA
ENSMUSG00000042595.7	287.404594905702	0.341012425056327	0.403679923955677	0.844759436423619	0.398245166722611	0.689355258345434
ENSMUSG00000040785.19	2193.87742977698	0.433844608247956	0.296951535052288	1.46099466423557	0.144016905739615	0.439043505492651
ENSMUSG00000009569.14	787.29012432751	0.644299873489564	0.268916449808783	2.3959109751289	0.016579116519083	0.153631247251713
ENSMUSG00000021311.9	496.082187279888	0.16322473413437	0.291095650480577	0.56072543119383	0.574984727726911	0.806929730574204
ENSMUSG00000070448.12	0	NA	NA	NA	NA	NA
ENSMUSG00000091930.2	0	NA	NA	NA	NA	NA
ENSMUSG00000013663.7	2331.55515965	0.298541852488077	0.22576247524131	1.32237145331161	0.186044489875407	0.489355507554162
ENSMUSG00000061143.15	136.545265668528	-0.0118661955205563	0.315040370604637	-0.0376656347178053	0.96995427606536	0.989301866099883
ENSMUSG00000040717.6	349.715331015209	0.0957018575520676	0.362573791162888	0.263951393853157	0.791817372884167	0.912925242673721
ENSMUSG00000078161.8	0.838909770281632	0.00626040297351654	2.66200947156911	0.00235175833909651	0.998123570060179	NA
ENSMUSG00000072720.9	14.5097828160752	1.06192593728832	0.820442966260128	1.29433242889381	0.195550619653526	NA
ENSMUSG00000036273.15	1059.47915791559	0.51749632954875	0.326649514830715	1.5842556197181	0.11313556077113	0.392855726886012
ENSMUSG00000021763.17	182.73652348103	0.903082887718924	0.342924138850348	2.63347716129435	0.00845155195195255	0.108509467626907
ENSMUSG00000047003.15	342.831346643047	-0.413325579801758	0.233307630116395	-1.77159049447099	0.0764625587306621	0.327231201838667
ENSMUSG00000031386.14	2310.99642719431	0.564381373334605	0.28994991114001	1.9464788629029	0.0515972445503529	0.270731024051895
ENSMUSG00000029729.12	869.937371464931	0.352714846493792	0.25636615730067	1.37582452460807	0.168875966724561	0.469509945843469
ENSMUSG00000097286.2	0.2508768630718	-1.26292281618843	4.49871515006025	-0.280729669263793	0.778917750679424	NA
ENSMUSG00000042359.18	68.3963789356099	0.209074548071196	0.504683310623361	0.414268797224455	0.678677262687271	0.860288001112828
ENSMUSG00000027508.15	168.277495732745	1.20686533997026	0.402432445238949	2.99892653847447	0.00270932623612025	0.0591477584794563
ENSMUSG00000090115.7	122.895953780211	0.176113120444256	0.319763797356417	0.550760035689581	0.581798183429647	0.810433870263337
ENSMUSG00000040612.13	259.33470532003	1.17175430234448	0.275840955505886	4.24793446714796	2.15750480181917e-05	0.00233412524264005
ENSMUSG00000064006.6	0	NA	NA	NA	NA	NA
ENSMUSG00000027630.13	1088.36163411622	0.351808844644806	0.233430959920837	1.50712161216367	0.131779488031217	0.420657292640861
ENSMUSG00000049100.15	230.528798226279	1.17894141491186	0.370693147364201	3.18037013442163	0.00147087049559752	0.0421754081552141
ENSMUSG00000027339.15	247.006832138224	-0.148023616478157	0.297673901176485	-0.497267700974553	0.619000285317254	0.830867168097436
ENSMUSG00000018800.14	914.243459074591	1.57935625062556	0.348298884961415	4.53448552039011	5.77440629629447e-06	0.000892577193937563
ENSMUSG00000024112.16	131.974221667885	0.376654890008352	0.495129828214879	0.760719448808664	0.446824655669029	0.72481558914471
ENSMUSG00000079698.7	0	NA	NA	NA	NA	NA
ENSMUSG00000035459.18	1.45954518462892	0.488399088286122	2.59615578203977	0.188123952986517	0.850779484549683	NA
ENSMUSG00000079227.10	6.36293094845118	1.30838506862492	1.44897460866402	0.902973082344955	0.366540181202648	NA
ENSMUSG00000069289.2	0.119844130619689	-0.0443040953327121	4.56207316163209	-0.00971139518439074	0.992251549512983	NA
ENSMUSG00000017412.15	14.1187811916587	0.96413536548775	0.937272753597655	1.02866039985371	0.303639284609489	NA
ENSMUSG00000024483.19	475.06496552674	0.734781797106401	0.245962939468658	2.98736792906165	0.00281390846197831	0.0603244102623127
ENSMUSG00000005442.13	1676.43230412621	0.198438200218213	0.34296291018867	0.578599592909473	0.562859379489456	0.801644710785487
ENSMUSG00000037339.17	1654.1330913521	-0.299224720819274	0.175840266094095	-1.7016848726739	0.0888144576691559	0.349539603961021
ENSMUSG00000014444.17	17990.0128480651	0.669487303296118	0.241319814511729	2.7742740671781	0.00553250479809683	0.0877371751471771
ENSMUSG00000037426.17	412.343315454169	-0.00667842526855705	0.222958765890996	-0.0299536339908793	0.976104031276423	0.991214000800825
ENSMUSG00000042700.16	1507.83124050148	0.523820745759166	0.235246910627357	2.2266849088995	0.0259683397159619	0.192091437018843
ENSMUSG00000019971.10	100.657758878944	1.35001481052351	0.558321272912132	2.41798920446288	0.0156065398249988	0.149565065184119
ENSMUSG00000016346.17	1.62131416666403	-3.64730674495796	3.04526920447108	-1.19769599994738	0.231035387137184	NA
ENSMUSG00000039361.11	14393.2639420033	0.773789334889198	0.300919952759521	2.57141252280991	0.0101284599632894	0.119795540533259
ENSMUSG00000014602.15	5053.43399773714	0.833759772188796	0.261224551692253	3.19173587163829	0.00141420589805072	0.0409875881831597
ENSMUSG00000017667.9	1063.34615040883	0.167728423872516	0.218724887339377	0.766846543677791	0.443172759685119	0.721992886583096
ENSMUSG00000026234.12	2433.21055577457	0.859233425964466	0.398252312641038	2.15751019816156	0.0309659333895351	0.210749161353776
ENSMUSG00000068270.15	654.527071519523	0.376669179014726	0.304274344795086	1.23792618555598	0.215743431900797	0.523478020422205
ENSMUSG00000046678.6	0	NA	NA	NA	NA	NA
ENSMUSG00000004319.15	312.437369629415	0.40379703620415	0.278205102590731	1.45143648496692	0.146658356426592	0.441715918751357
ENSMUSG00000019775.17	326.765861820746	0.326736227914233	0.302574326196269	1.07985443451766	0.280207006600762	0.589521874963555
ENSMUSG00000037533.19	555.935016003564	0.62571407366545	0.349514436526085	1.79023813689811	0.0734156366163146	0.31992898631839
ENSMUSG00000115267.1	0	NA	NA	NA	NA	NA
ENSMUSG00000007880.16	727.031786383503	0.824660966039464	0.345995519453622	2.38344406118821	0.0171514909412439	0.156292028105335
ENSMUSG00000052707.8	901.905538983611	0.774266726817732	0.30894247638699	2.50618411515503	0.0122042052061683	0.131483982285535
ENSMUSG00000030000.10	21.6196527906063	0.456893446376598	0.72660377705693	0.62880686944296	0.529475502208715	NA
ENSMUSG00000013033.16	2599.21907258533	0.221169421348539	0.232006578671588	0.953289439527533	0.340443440673139	0.641913174504578
ENSMUSG00000049571.18	0.73840401233492	0.703807505887745	3.15962053318288	0.22275064315358	0.823729583880121	NA
ENSMUSG00000057203.3	0	NA	NA	NA	NA	NA
ENSMUSG00000037685.15	76.1795668746437	-0.101333562500709	0.414093818121928	-0.244711604148776	0.806679742373085	0.920824138480031
ENSMUSG00000021557.15	683.323557632619	0.331297991870353	0.223882129291466	1.47978756910537	0.138929947141006	0.431584645218816
ENSMUSG00000062901.3	974.327622713846	0.495980153899386	0.253643202466323	1.95542458491565	0.0505329766763979	0.268285617980339
ENSMUSG00000045417.2	0	NA	NA	NA	NA	NA
ENSMUSG00000005886.14	623.410435493364	0.63372686517564	0.205931989086615	3.07735999630973	0.00208842916246413	0.050878977131916
ENSMUSG00000006281.8	399.358829021641	0.534038120180987	0.319284579254857	1.67260855950926	0.0944043807586327	0.360053917311994
ENSMUSG00000021318.15	912.776925226017	0.624571450367397	0.22504569580944	2.77530946824355	0.00551492028805904	0.0875615679265855
ENSMUSG00000052544.9	33.8206790901559	0.761186861691041	0.562233187357375	1.35386327027189	0.175780003546119	0.477843033694808
ENSMUSG00000022892.11	18059.5110137745	0.90185168920884	0.198998114301168	4.53196098051442	5.84386460489915e-06	0.000893048763712315
ENSMUSG00000039385.5	227.762180753847	1.62108322145543	0.472864539296733	3.42821904951127	0.000607555024064352	0.0238357272204863
ENSMUSG00000103146.1	0.239688261239378	0.663291498136505	4.53105790254795	0.146387777954353	0.88361527515386	NA
ENSMUSG00000075254.12	754.66167388871	1.22872087252135	0.323463944064359	3.79863318638345	0.000145496237815768	0.00853671028533501
ENSMUSG00000091896.8	1481.23035295583	0.160849569471975	0.193558764241222	0.831011554049375	0.405967102280061	0.695364177464552
ENSMUSG00000041702.7	2151.58665281746	0.307786085896315	0.22886021824318	1.34486494970161	0.178668851013612	0.481796276142073
ENSMUSG00000044912.10	4.74352004214232	-1.02867459671036	1.34897777322333	-0.762558595945123	0.445726685099146	NA
ENSMUSG00000026163.17	6.4740319179668	0.669998808542549	1.17353514855309	0.570923512064063	0.568051492225182	NA
ENSMUSG00000028760.16	1099.49988378356	0.814238701054528	0.226017452838189	3.60254790428711	0.000315113305417823	0.015579572541393
ENSMUSG00000021733.10	1890.30303866848	0.936988369496591	0.299670955577826	3.12672400196372	0.00176765786638772	0.0462479824653346
ENSMUSG00000029502.14	1972.1783736459	0.598341591784736	0.279357434974477	2.14184953351752	0.0322055919904937	0.2152997662153
ENSMUSG00000022272.17	3886.05367867689	0.92461714504942	0.276538078177627	3.34354368534924	0.000827156696620188	0.0294085663192676
ENSMUSG00000042282.4	0	NA	NA	NA	NA	NA
ENSMUSG00000032911.6	8246.00324520415	1.18119844489199	0.291235654428302	4.05581674816117	4.99594181372716e-05	0.00412180524607379
ENSMUSG00000038970.7	1459.85213118973	0.44544033330353	0.213363930095219	2.08770213927322	0.0368247117571021	0.230174389358918
ENSMUSG00000048251.15	19.6834273942187	0.448394398322052	0.77165946980376	0.581078073772726	0.561187835475603	NA
ENSMUSG00000025558.17	408.763446840699	0.42014727348492	0.221629279245103	1.89572097565806	0.057996950158743	0.286743744755432
ENSMUSG00000027823.9	1460.70648651894	0.529823730966029	0.273762708735817	1.93533930684954	0.0529486718576789	0.273857741919137
ENSMUSG00000032409.15	364.467050405554	0.758425768647953	0.375004373041737	2.02244513176262	0.0431303865516519	0.248272266594017
ENSMUSG00000038495.14	1769.2462922371	0.29304728002746	0.240996770462764	1.21598011236726	0.223992498051565	0.531280207052574
ENSMUSG00000026313.16	695.579782096586	0.13575472094328	0.285583315198967	0.475359426543177	0.634530808584566	0.838476006076962
ENSMUSG00000061602.3	0	NA	NA	NA	NA	NA
ENSMUSG00000039704.7	533.939497502915	0.725244348771389	0.332648296898224	2.18021362361968	0.0292416302126227	0.205348012062324
ENSMUSG00000020003.16	498.761181055637	-0.232323522904669	0.246928612901243	-0.940852986517137	0.346780202979675	0.646989479699038
ENSMUSG00000025016.11	12063.9711798577	0.341780122331897	0.254132923596604	1.34488722474393	0.178661656421304	0.481796276142073
ENSMUSG00000069044.6	0	NA	NA	NA	NA	NA
ENSMUSG00000024542.9	536.419600881099	0.469923396297161	0.371253340671627	1.2657755360451	0.205593456023134	0.513048950936928
ENSMUSG00000032440.13	4300.91077894661	-0.221576290581308	0.288009331635528	-0.769337192385521	0.44169316352724	0.721385676841672
ENSMUSG00000024563.16	2061.28928994106	0.129979975309975	0.178845494977944	0.726772431846858	0.467365373747449	0.739409503163548
ENSMUSG00000097451.10	13327.1918093307	-0.249219813004058	0.210885666056723	-1.18177692047132	0.237294227790056	0.544730842194298
ENSMUSG00000044072.14	24.9218703331825	0.227603839933462	0.618415830195559	0.368043359856245	0.712840903313064	0.876260006193244
ENSMUSG00000044308.17	1034.37511859723	0.982831978863619	0.294136668242363	3.34141263221825	0.000833532448432361	0.0294439966563432
ENSMUSG00000042444.10	851.532937643723	0.511604757825375	0.247931961146647	2.06348852910807	0.0390662365381925	0.237613183611765
ENSMUSG00000053702.16	72.0978679230517	0.685049282826065	0.483054543731246	1.41816134785641	0.156143663741132	0.454262410444685
ENSMUSG00000068748.7	471.671574274302	2.09657523165887	0.30527006117366	6.86793596331802	6.51374463072778e-12	1.26998227263224e-08
ENSMUSG00000037940.17	16.2699482926239	-0.552667512207312	0.957231427421929	-0.577360392037888	0.563696024752694	NA
ENSMUSG00000040797.16	1.84259632806385	0.0184688774354669	1.98833785994999	0.00928860120177534	0.992588875079446	NA
ENSMUSG00000030213.12	649.592410320888	0.772725385384384	0.311116876099402	2.48371414329031	0.0130020133061287	0.136176849642382
ENSMUSG00000036523.16	30.6441355940458	0.0183808106731505	0.662679523265022	0.0277371037248718	0.977871830586087	0.991895040348903
ENSMUSG00000031314.18	595.28313322512	0.700354997860994	0.350873567275552	1.99603236943461	0.0459303995503377	0.255658945841449
ENSMUSG00000049583.15	0.127994757404053	-0.0443040953327121	4.56207316163209	-0.00971139518439074	0.992251549512983	NA
ENSMUSG00000027284.16	362.447524695918	0.34028887705587	0.255547013363653	1.33160968143121	0.182988481916954	0.48565800371407
ENSMUSG00000030660.9	2687.99043919172	0.730898131514746	0.335680014942058	2.17736564281584	0.029453297006898	0.2063227749218
ENSMUSG00000020021.4	362.857654860048	0.429544404378554	0.264491636139337	1.62403776031793	0.1043677498779	0.376991001976362
ENSMUSG00000026159.13	2500.18381758456	-0.017190795540818	0.179684344537559	-0.0956721943976855	0.923780925230036	0.971516831898657
ENSMUSG00000052854.15	83.7250461832172	0.294944921243212	0.544520775809793	0.541659628697509	0.58805300597002	0.813406329612558
ENSMUSG00000028078.14	43.3159583268288	0.0463378302293454	0.585569233785737	0.0791329659343077	0.936926862696858	0.976343202672479
ENSMUSG00000034040.16	961.377069135218	0.365366340818965	0.311484935064539	1.17298238113269	0.240802871200867	0.549239656022602
ENSMUSG00000027820.12	101.869640929687	1.01803023396478	0.384988037102892	2.64431653935445	0.00818560670523434	0.107808234439569
ENSMUSG00000100967.1	13.8791715281341	0.103586199561261	0.804138022539294	0.128816442772049	0.897502894482222	NA
ENSMUSG00000034312.14	769.975015529373	0.662721503718295	0.395888053639331	1.67401238210148	0.0941281658969854	0.359652672027057
ENSMUSG00000052812.5	314.793154603716	0.52966172211313	0.328741833798588	1.61117834013678	0.107140857329186	0.382284491738631
ENSMUSG00000072640.11	248.580963817239	-0.364221497201924	0.30344494882275	-1.20028854859824	0.230027295616393	0.538255165497432
ENSMUSG00000026944.18	589.569115039466	0.552376672882712	0.343720641601899	1.60705120969279	0.108043134928569	0.383469009902188
ENSMUSG00000020790.14	2726.65675875388	0.444431697157746	0.200190135852926	2.22004793225305	0.0264155140731218	0.193427148660286
ENSMUSG00000025194.5	0.119844130619689	-0.0443040953327121	4.56207316163209	-0.00971139518439074	0.992251549512983	NA
ENSMUSG00000026425.15	858.413669638459	0.436010301821774	0.186162104391409	2.34210019943186	0.0191755660820673	0.16594144959565
ENSMUSG00000036103.9	1538.00227196843	0.559870575558358	0.176801971995572	3.16665345549642	0.00154203961539448	0.0431129911597193
ENSMUSG00000018160.15	1425.79096615187	0.361583355980518	0.243000736698513	1.48799283859426	0.136752782255847	0.427720088777009
ENSMUSG00000048264.16	825.924677234132	0.177293007850972	0.199155361761382	0.890224628063975	0.373345283013208	0.667563803478477
ENSMUSG00000036712.15	1031.03969577812	0.657836439657835	0.24327517839395	2.70408368005617	0.00684930381071292	0.0977807193699229
ENSMUSG00000057738.13	8099.53705316795	0.710023713760769	0.202956581329266	3.49840201835518	0.000468055032818924	0.0202392414191283
ENSMUSG00000038146.8	561.099616792352	1.39465026227197	0.860229667598849	1.62125338709237	0.10496330736459	0.377767355450879
ENSMUSG00000030022.14	760.97892263346	1.09805116896374	0.210689571368823	5.21170156562492	1.87116388294544e-07	6.13741753606106e-05
ENSMUSG00000032560.14	1816.51632287158	0.960161119992949	0.3340870704281	2.87398467340444	0.00405328632231557	0.0734617176044472
ENSMUSG00000043671.14	1062.40623998555	0.366241852954595	0.237137910285802	1.54442557292166	0.122485268801451	0.406009833581936
ENSMUSG00000014030.15	0	NA	NA	NA	NA	NA
ENSMUSG00000042286.13	157.458751536287	0.0896724962130103	1.30010677157021	0.0689731783372746	0.945010969227715	0.979415198989653
ENSMUSG00000049804.9	307.604807534381	0.857930784461179	0.296558127160257	2.89295994912175	0.00381629957396306	0.0709719444541979
ENSMUSG00000005610.17	16031.5895827679	0.644355893448362	0.205237920600762	3.13955574857821	0.00169204216308161	0.0449277119806386
ENSMUSG00000070498.3	2.84610292440724	0.225419919188463	1.84527033852796	0.122160918366188	0.902771577206142	NA
ENSMUSG00000037674.15	304.658437844621	0.233966629687793	0.277892897451028	0.841930944741125	0.39982660793505	0.690332562270709
ENSMUSG00000033184.14	6743.42502233551	0.091846340270285	0.229723641019877	0.399812313014567	0.68929476099272	0.864785515983777
ENSMUSG00000026933.17	2120.17181980058	0.370769436000022	0.206519423842377	1.79532476462363	0.0726019716192381	0.318815330857692
ENSMUSG00000090762.2	0	NA	NA	NA	NA	NA
ENSMUSG00000038241.16	1442.94492307147	0.186427903009467	0.228061307329153	0.817446436630314	0.413673347538251	0.701169545966019
ENSMUSG00000056673.14	49.7899606301766	21.5010114135291	4.40813309955489	4.87757763387412	NA	NA
ENSMUSG00000024924.14	795.427091438715	0.839066591830467	0.212952698239173	3.94015477976283	8.14290540118354e-05	0.00573328753063436
ENSMUSG00000008763.16	3088.31384503775	0.367977155713779	0.240610875852736	1.52934548120342	0.126178820207177	0.412658748576391
ENSMUSG00000028518.8	83.4660389480685	1.1582845310679	0.395985873225911	2.92506528485953	0.00344383966043742	0.0673331556384581
ENSMUSG00000031488.14	123.777776578627	-0.177187798180811	0.367687126458185	-0.481898291864624	0.629878199602438	0.836252625750992
ENSMUSG00000022799.4	1251.60160607019	0.669755418970407	0.308339323418592	2.17213753842603	0.0298452902867385	0.20721161569437
ENSMUSG00000027797.15	575.962638390433	0.750634651631108	0.2581865332323	2.90733463993544	0.00364523011914216	0.0689739382750083
ENSMUSG00000025241.16	516.502918660724	0.378234613650012	0.21789474021275	1.73585931115505	0.0825887137959354	0.338923717768611
ENSMUSG00000006204.6	0.601296185730502	1.83692126801588	3.43456722021412	0.534833401193806	0.592765064142056	NA
ENSMUSG00000061376.2	0	NA	NA	NA	NA	NA
ENSMUSG00000091879.2	0	NA	NA	NA	NA	NA
ENSMUSG00000020841.5	3295.67066363702	0.974181622808014	0.241475349358078	4.03429014761844	5.47676106109154e-05	0.00449094407009507
ENSMUSG00000021843.17	592.74062612369	1.41187626164955	0.370205779178239	3.81376072730023	0.000136867986380253	0.00819811883911277
ENSMUSG00000004698.10	78.8795198696471	-0.219419078341948	0.427602781113537	-0.513137631543346	0.607855049514503	0.824090927534769
ENSMUSG00000038024.17	562.97307712639	0.623342418915374	0.255940861994179	2.43549394207147	0.0148714736141172	0.145847057890753
ENSMUSG00000008730.17	1701.29667795724	0.457006288761387	0.194575951035574	2.34872956462041	0.018837583035788	0.164285224815355
ENSMUSG00000096630.2	16.2234244978181	0.35255293065012	1.31428283960937	0.268247381784963	0.788508905557791	NA
ENSMUSG00000060961.14	324.665847428312	0.499973695611242	0.476174016606244	1.04998105351195	0.2937268237569	0.600766285305367
ENSMUSG00000045095.16	713.20432552118	0.443408351168502	0.217528025925133	2.03839642861058	0.0415103031786965	0.244417806226478
ENSMUSG00000047730.17	0.245764211335494	-2.77885501626042	4.47934995754493	-0.620370152499422	0.535014118373206	NA
ENSMUSG00000026447.16	96.0690186275401	0.13806609916824	0.340566628176995	0.405401139586952	0.685182673446045	0.862352260442143
ENSMUSG00000078190.7	212.319405435835	0.339359725815426	0.486626545746897	0.697371996619216	0.485570021851388	0.752993286473475
ENSMUSG00000063583.6	0	NA	NA	NA	NA	NA
ENSMUSG00000020156.16	1219.32228806263	-0.399784896410267	0.199402432058351	-2.00491484624058	0.0449721512747861	0.253097688506555
ENSMUSG00000033577.18	372.533224447177	0.740099111983369	0.274191391743021	2.69920622700296	0.00695050905846858	0.0982864835102897
ENSMUSG00000034656.17	448.186796566009	0.127687234779732	0.323848712787067	0.39428050734198	0.693373953005474	0.866797147555359
ENSMUSG00000027253.15	273.192905103012	0.886388123279095	0.273619615627697	3.23949041900989	0.00119743489373099	0.0371039273062082
ENSMUSG00000028977.16	6.1106790700825	0.757285477462341	1.1985527881726	0.631833228319424	0.52749585838538	NA
ENSMUSG00000039270.9	464.173323023439	0.77365679669479	0.269113456855776	2.87483504442295	0.00404238629174054	0.073363037586136
ENSMUSG00000066392.11	0.721140316350191	2.10748087329256	3.19654593589219	0.659299417420805	0.509703516444485	NA
ENSMUSG00000078776.9	116.365716728925	-0.153248572182539	0.392684908184534	-0.390258369976681	0.696345503489256	0.867679325347337
ENSMUSG00000053007.9	112.853665381901	0.637727746758659	0.377093398014937	1.69116656540722	0.0908049947294091	0.352999097248752
ENSMUSG00000034910.5	143.514964735307	0.0419999745640377	0.381498825541442	0.110092015367096	0.912336400479817	0.965835719262768
ENSMUSG00000023852.14	833.718283290255	0.859242314116554	0.354202084135127	2.42585335491351	0.0152724400632442	0.147821225249772
ENSMUSG00000034573.14	217.243045486593	-0.230931016973263	0.428019814406643	-0.539533472985122	0.589518806775232	0.814488720448246
ENSMUSG00000010175.13	11.1945662596316	1.24920173710143	1.01484936800451	1.23092330397537	0.218351550742443	NA
ENSMUSG00000015882.17	160.190637733525	0.408062392300121	0.447852157390992	0.911154240446958	0.362214110686158	0.660392538029752
ENSMUSG00000022604.18	164.489193872158	0.4863847309885	0.293583951604678	1.65671430039008	0.0975772504188263	0.3647393281378
ENSMUSG00000045328.11	305.320677024682	0.915584920308905	0.488182831565883	1.8754959435425	0.06072452702738	0.293222060848907
ENSMUSG00000031596.15	119.501070253744	0.198258096284117	0.362703787860894	0.546611595796606	0.584645600858439	0.811719392973806
ENSMUSG00000048410.17	537.089217938285	0.508040788962477	0.286569624090066	1.77283545168348	0.0762559770637855	0.327015348851147
ENSMUSG00000039607.15	1512.19317824518	0.381386170619071	0.276499942634758	1.37933544211567	0.167791353764358	0.469313254039742
ENSMUSG00000024236.18	249.245120978504	0.493808549077768	0.261324594243374	1.88963671983311	0.0588065626450244	0.289151976033012
ENSMUSG00000042323.17	1160.26074216587	0.927004214132451	0.310427089631408	2.98622203118016	0.00282447487870957	0.0603244102623127
ENSMUSG00000025780.7	13.6305299747693	0.20776588842768	0.797576155831242	0.260496614534752	0.794480726408335	NA
ENSMUSG00000036452.18	34.9726367425344	0.237701444651435	0.601069176566237	0.39546437235289	0.69250021001246	0.866438009835479
ENSMUSG00000026987.16	287.321783759328	0.713138429625096	0.299949437729096	2.37752880960283	0.0174290814188479	0.157908323582868
ENSMUSG00000057132.16	6.70939172033466	0.174070126499157	1.28016652618562	0.13597459622524	0.891841363692844	NA
ENSMUSG00000025159.8	1210.71270045343	0.00307226153561687	0.228997973494423	0.013416107962596	0.989295815702716	0.995988969151346
ENSMUSG00000061186.15	137.658398294961	0.176007703313082	0.314678404267306	0.559325650970221	0.575939492317536	0.807468128928923
ENSMUSG00000035168.16	3093.9659628066	0.452879302843786	0.209283041469196	2.16395604567149	0.0304677229325173	0.209366345424881
ENSMUSG00000096099.2	0.225462540302707	-0.0443040953327121	4.56207316163209	-0.00971139518439074	0.992251549512983	NA
ENSMUSG00000032482.9	13.5336012202433	0.0503249858520992	0.82859867015286	0.0607350550572514	0.951570213303391	NA
ENSMUSG00000048490.14	487.600837811739	0.98999538534207	0.301441656111741	3.28420231666685	0.00102271476209315	0.0332209374894412
ENSMUSG00000026667.14	4765.30350478389	0.517096422248033	0.231731804234302	2.23144347387553	0.0256517678649244	0.1911144067963
ENSMUSG00000055485.6	1380.13035425615	0.884883381676904	0.321037769774945	2.75632173216637	0.00584554672555126	0.0898789117544983
ENSMUSG00000027867.10	0.239688261239378	0.663291498136505	4.53105790254795	0.146387777954353	0.88361527515386	NA
ENSMUSG00000030020.13	356.952256296079	0.476828014388889	0.271447354995426	1.75661322762538	0.0789837567860499	0.331825542411371
ENSMUSG00000071856.10	344.386202393838	0.368592587801921	0.356259666334219	1.03461778762273	0.300847443640481	0.606331291943848
ENSMUSG00000054423.14	2.2122059434269	-2.04606693840351	1.76704188643968	-1.15790517140826	0.246902736914055	NA
ENSMUSG00000066640.11	1036.8983148717	0.0325123571126855	0.238215780656888	0.136482801529905	0.891439619714246	0.957590862362583
ENSMUSG00000019471.10	5851.49409734347	0.113227593903436	0.245443828079584	0.461317747483642	0.644570653831683	0.843519022672808
ENSMUSG00000021782.14	1043.56277839761	0.936215553534055	0.376518831309122	2.48650392937564	0.0129005144971196	0.135748136899268
ENSMUSG00000005506.16	4396.5342642047	0.208862026521521	0.188204986635999	1.10975819639399	0.26710323759001	0.575365103173226
ENSMUSG00000089715.12	1500.23399777756	0.0344398433888176	0.286701272713444	0.120124487285552	0.9043845347948	0.963339661300631
ENSMUSG00000031732.12	300.906575249194	0.221587882966688	0.245781338878731	0.901565122794047	0.367287925202741	0.664329255968589
ENSMUSG00000021413.9	772.309307534113	0.972022270409661	0.398071522000875	2.44182820595622	0.0146130986475326	0.145074561726955
ENSMUSG00000112280.1	14.5979860260296	1.17315337350494	0.87269326559432	1.34429062278371	0.178854426683799	NA
ENSMUSG00000066113.16	290.728357255227	1.50061953235937	0.362989106283377	4.13406216986542	3.56406994996684e-05	0.00319530751247694
ENSMUSG00000039176.17	2203.89371844737	0.09282310898254	0.216807576933196	0.428135908788562	0.668552174655648	0.856329634733093
ENSMUSG00000006527.16	242.028045623565	0.325124101717599	0.281078069201194	1.15670391020395	0.247393351594642	0.555880667041729
ENSMUSG00000039959.13	1655.71519704556	0.629927654612597	0.2166470293758	2.90762193429346	0.00364188333139011	0.0689739382750083
ENSMUSG00000030268.17	4299.75888801623	-0.599322766475222	0.263254115010653	-2.27659410547474	0.0228104752071767	0.181083394678933
ENSMUSG00000022142.8	1204.98805331844	0.441044641994369	0.259220282603797	1.70142798072819	0.0888626508274898	0.349626953870124
ENSMUSG00000030757.13	23.525395146975	0.532822976083447	0.604038239349667	0.882101399171527	0.377721975659807	NA
ENSMUSG00000062818.7	0	NA	NA	NA	NA	NA
ENSMUSG00000022836.11	1020.9224804792	1.10406038513846	0.206525076666474	5.3458902083908	8.99737370876827e-08	3.78114630110987e-05
ENSMUSG00000041570.14	1164.95391540805	0.656783301642237	0.293119601828604	2.24066660006682	0.0250476791380666	0.189130370044199
ENSMUSG00000030554.16	57.1190711856616	-0.429699675299625	0.50281923609641	-0.854580820406868	0.39278324924863	0.684211106820199
ENSMUSG00000044176.12	23.1392698673028	1.58842151745195	0.745390764804684	2.1309916790667	0.0330898276955892	NA
ENSMUSG00000055884.8	297.131756064245	0.60111615923207	0.423732495019586	1.4186218104521	0.156009303716596	0.454192352498253
ENSMUSG00000034320.14	746.785845306026	0.528264044410569	0.276296190180633	1.91194834813035	0.055882819464159	0.280624404837196
ENSMUSG00000052572.17	18.725848420141	1.27714756506069	0.75625233798325	1.6887849477154	0.0912606494337444	NA
ENSMUSG00000018750.14	1382.76871514041	0.301690691456376	0.238790810989892	1.2634099704496	0.206441882810391	0.514241610408693
ENSMUSG00000078234.6	103.456074370812	1.70083943231213	0.588041832589809	2.89237829360103	0.00382337282218746	0.0709719444541979
ENSMUSG00000052085.7	118.436670968575	0.337994128588681	0.315240339625454	1.07217917919471	0.283639560324906	0.591760160128306
ENSMUSG00000047248.20	372.133902592331	0.641864392425859	0.259344868216734	2.47494541472652	0.0133256540741468	0.138244317823221
ENSMUSG00000027326.13	156.123466212509	0.780155220007334	0.530931534572069	1.46940833084277	0.141722069061957	0.435728940270965
ENSMUSG00000026083.12	547.204694648215	1.02961535147781	0.332698852781305	3.0947367051927	0.00196987680607558	0.049370109894222
ENSMUSG00000027663.12	2287.35782643996	0.435613107548062	0.322507412627448	1.35070727211865	0.176789221857171	0.478940663887033
ENSMUSG00000100586.2	0.48849044762293	-2.18165340504264	4.32221901776449	-0.504753090039159	0.613732267393258	NA
ENSMUSG00000039748.11	435.849801462998	-0.0250011260460754	0.355196617195219	-0.0703867233970154	0.943885858233286	0.979276116457431
ENSMUSG00000036381.13	67.8104398328771	0.978687784035263	0.43764876032636	2.23624027474782	0.0253360363542283	0.190426103453275
ENSMUSG00000020900.15	5935.11697678194	1.0101990456955	0.268858819390141	3.75735878029577	0.000171716214994767	0.00970268764390602
ENSMUSG00000065954.11	1852.16521393647	0.163673608962225	0.194327180550246	0.842257930665058	0.399643593642904	0.690265482572538
ENSMUSG00000020121.15	268.663277110882	0.739304156427483	0.348248877772449	2.12291899160277	0.0337606407170896	0.219601226078961
ENSMUSG00000024589.17	574.520448426967	0.453454746692269	0.225020984048759	2.01516649040167	0.0438872073373336	0.250386945417442
ENSMUSG00000057406.16	1537.36884355637	-0.0707828033739385	0.221291586225199	-0.319862153737313	0.749072828740711	0.893867793288903
ENSMUSG00000055489.8	29.6673856126867	0.565469749509733	0.666176009387865	0.848829350713682	0.395976255633743	0.687019569831322
ENSMUSG00000024251.10	536.796599397722	0.5087851841346	0.261109985650844	1.94854740184064	0.051349498741864	0.270294495360791
ENSMUSG00000021275.16	566.550036518154	0.16143933487345	0.215511550872586	0.74909829296758	0.453797963837724	0.729461512991838
ENSMUSG00000067242.11	0.611372553290677	-2.46366816503127	3.97357429938494	-0.620013111473118	0.535249154799747	NA
ENSMUSG00000110444.1	90.0221872717172	0.325063763436847	0.459570537172786	0.707320720419968	0.479367191875022	0.748638949754419
ENSMUSG00000040524.9	390.678370435759	0.622696983765043	0.394378397921464	1.57893278903437	0.114351474155966	0.394610886438141
ENSMUSG00000024066.9	18.0307266579859	0.889195444108882	0.752219905213236	1.18209507345703	0.23716797897874	NA
ENSMUSG00000036790.5	36.9076849580016	1.13813195825406	0.776834194273788	1.46508993378957	0.14289638267275	0.437140708412908
ENSMUSG00000023868.17	305.873520815635	-0.295412443550602	0.281568377914682	-1.04916768615301	0.294100948146551	0.601165762376474
ENSMUSG00000027272.5	495.180902285474	0.956610544379737	0.315857662966916	3.02861274725488	0.00245679383809289	0.0554345025749551
ENSMUSG00000020114.12	5494.12384840776	0.380738628442522	0.179895686661289	2.1164411193437	0.0343073080037632	0.22164644096457
ENSMUSG00000035181.6	3835.86560595758	0.249594263384971	0.179272592030451	1.39226114018909	0.1638433343803	0.46511923127903
ENSMUSG00000038774.9	812.304080029948	0.709815620172792	0.319805050283574	2.21952598792105	0.0264509612125421	0.193427148660286
ENSMUSG00000058975.7	0.737441569918919	2.13728557440356	3.82812761569904	0.558310952236445	0.576632067434378	NA
ENSMUSG00000053253.16	2422.9520915634	-0.00884844741008642	0.186050131529957	-0.0475594794656821	0.962067326164943	0.985893576336673
ENSMUSG00000110519.2	0.119844130619689	-0.0443040953327121	4.56207316163209	-0.00971139518439074	0.992251549512983	NA
ENSMUSG00000028106.13	475.283733694038	0.574455876547286	0.230506020300405	2.49215129304922	0.0126971939702446	0.134226469030554
ENSMUSG00000001280.13	1516.12343577618	0.202168400772409	0.230617366232404	0.87663996894611	0.380682222530484	0.674139390122458
ENSMUSG00000002897.5	818.676718284875	0.44351551397405	0.192576159015365	2.30306553127724	0.0212751563036207	0.174882825165704
ENSMUSG00000060657.8	974.847401235496	0.369821565527856	0.268288477880181	1.3784474400463	0.168065184988736	0.469461019478692
ENSMUSG00000093942.3	0	NA	NA	NA	NA	NA
ENSMUSG00000036499.9	686.958709906648	1.00076027983575	0.393969168234803	2.54019948901002	0.0110789256521316	0.125942005215441
ENSMUSG00000038126.17	226.595598051182	0.209577712928608	0.307027370785302	0.682602702138764	0.494857926170098	0.758471300641978
ENSMUSG00000052299.9	1190.70777193474	0.713252066596155	0.26549086237589	2.68654092353021	0.00721961036368704	0.100331936436475
ENSMUSG00000041966.18	173.183936791641	0.404254540402011	0.313564306337967	1.28922371657409	0.197320322165556	0.503522522292675
ENSMUSG00000096188.1	3950.76729040727	-0.0485745411415614	0.183122859906068	-0.265256566910748	0.790811820937627	0.912517869946922
ENSMUSG00000068036.15	1364.91393761145	0.753570756001945	0.209408714868663	3.59856444596667	0.00031997856376816	0.0156573502362626
ENSMUSG00000039852.17	930.548647625467	0.35090946264132	0.344896150110921	1.01743513961656	0.308946472670527	0.613332176627287
ENSMUSG00000105449.1	8.00962185091451	0.652484553390213	1.09013878441121	0.598533473646314	0.549484030599004	NA
ENSMUSG00000058881.13	2079.13584657326	-0.012262208498462	0.211895590051207	-0.057869106645866	0.953852891193466	0.983262385813815
ENSMUSG00000043702.9	907.845544131871	0.32571286204693	0.19753785309935	1.64886302516974	0.0991756995725532	0.367931703688258
ENSMUSG00000030583.16	620.239737194942	0.328343604250494	0.347239673483897	0.945582055633745	0.344361800287858	0.645031849395813
ENSMUSG00000095658.2	0	NA	NA	NA	NA	NA
ENSMUSG00000033623.13	4241.27411536997	0.227149891015731	0.185840228081352	1.22228590311618	0.221599528259331	0.528943992905836
ENSMUSG00000033713.12	3001.74756807971	-1.54349296622452	0.804681508180656	-1.91814146408593	0.055093076099082	0.278740288705965
ENSMUSG00000026812.16	995.043296484385	0.149738118151527	0.228472698702989	0.655387357008394	0.512218389470896	0.770763444288308
ENSMUSG00000021767.18	337.353909807761	0.0741291291340086	0.279347007557888	0.265365753447877	0.79072771548412	0.912517869946922
ENSMUSG00000002835.9	1232.91413381185	-0.215862763014398	0.213020164670163	-1.01334426883312	0.310895749400645	0.614250309844609
ENSMUSG00000002266.17	147.005170741323	1.0000279881475	0.336766157691936	2.96950262164494	0.00298282267181805	0.0617123066009371
ENSMUSG00000035401.9	373.399598098839	0.461112133863018	0.343369615739383	1.34290313623149	0.179303340793994	0.481886666805864
ENSMUSG00000046169.10	647.512709713508	0.240839420617986	0.319229936459437	0.754438707375392	0.450585836479317	0.727063726593618
ENSMUSG00000056919.9	94.1830589968316	0.62897988569883	0.477763906092844	1.31650775137584	0.188003678480392	0.491499507815768
ENSMUSG00000061436.15	1074.62269282936	0.663160598809383	0.253601667227053	2.61496939693084	0.00892354505274314	0.112048397637059
ENSMUSG00000036473.16	593.105924855526	0.164898096464006	0.219861952660225	0.750007422697823	0.453250234261856	0.72919118917974
ENSMUSG00000054555.11	1913.30622557033	0.163179217746357	0.254334325697829	0.641593372418901	0.521137237331175	0.776049826507569
ENSMUSG00000040855.15	6.07088837857668	0.544245580938358	1.21830182275665	0.446724753072186	0.655073807213664	NA
ENSMUSG00000096822.2	0	NA	NA	NA	NA	NA
ENSMUSG00000038002.9	438.814739953867	0.563865541916459	0.290543501168688	1.94072674022429	0.0522914311352125	0.272775471647144
ENSMUSG00000025899.14	2078.51676908008	-3.35935620553517	1.21595731156326	-2.76272544569539	0.00573209606075669	0.0888618823439591
ENSMUSG00000033396.13	1439.44629567717	0.3525690386658	0.220972176781027	1.59553588963908	0.110592450960964	0.387808938858683
ENSMUSG00000021096.11	4116.66854275169	-0.186035859487902	0.167676492254841	-1.10949279166192	0.267217652365986	0.57542722001886
ENSMUSG00000027966.20	6968.53003010276	0.974043666052513	0.268447107747723	3.62843792292925	0.000285141292215221	0.014524924612539
ENSMUSG00000034525.7	1155.23343840669	0.326961059344197	0.272933033863266	1.19795341266018	0.230935154152969	0.538563550212971
ENSMUSG00000061731.9	6169.26168566233	0.185161596919334	0.177097036451801	1.04553752354703	0.295774607407374	0.60312809585854
ENSMUSG00000025959.13	557.666009021702	0.765212856253614	0.202122717678596	3.78588248289048	0.000153164049564242	0.00887823335577556
ENSMUSG00000030074.9	2774.25620411462	0.488560593190241	0.215694239683731	2.26506092098986	0.0235089413130128	0.184063111297259
ENSMUSG00000033295.14	3577.11490006132	0.704804572754193	0.265845097383427	2.65118514387218	0.00802098593926004	0.107116404082591
ENSMUSG00000039968.9	108.782796851134	0.571625754093394	0.414956619911992	1.37755545197623	0.168340583021393	0.469509945843469
ENSMUSG00000005893.14	1132.7509235246	0.265517462577802	0.258235072421847	1.02820062390309	0.303855465020654	0.609164876197875
ENSMUSG00000040605.7	100.675433693839	0.88066153885236	0.499427708989323	1.76334136653036	0.0778429324205027	0.329980144033388
ENSMUSG00000006362.16	2.56069952530979	0.303104158403992	1.80887689800963	0.167564834697988	0.866925637818407	NA
ENSMUSG00000020580.10	3749.90504744952	0.8023552971364	0.33188609346648	2.41756226889765	0.0156248603502264	0.149565065184119
ENSMUSG00000040760.11	534.820608951116	0.852237981672297	0.33622822152729	2.53470091773104	0.0112543367415385	0.127290429352573
ENSMUSG00000039630.10	4706.33825716891	0.639884846063898	0.271366810515907	2.35800702689981	0.0183733451608019	0.162075995250121
ENSMUSG00000026349.14	629.22701990366	0.135632174805064	0.244688064664974	0.554306459494751	0.579369130342436	0.808647382708615
ENSMUSG00000060988.12	46.6615321671462	0.136274466572796	0.507358200437545	0.268596164317977	0.788240464294335	0.911223051992626
ENSMUSG00000042345.15	0.255989514808106	0.72685561749158	4.52786595683885	0.160529402685551	0.87246406196152	NA
ENSMUSG00000051786.15	830.353172330948	0.218102749956233	0.240214769790876	0.907948958118213	0.363905189529534	0.661938032010232
ENSMUSG00000025314.16	544.045906179194	0.783898127059876	0.213895524919022	3.66486455177896	0.000247469516419727	0.0129778337845198
ENSMUSG00000103976.1	2.35346397935162	-1.35639771821644	1.97503941271027	-0.686769949747536	0.492227709169431	NA
ENSMUSG00000058099.16	18.5036416034078	-0.657816520676932	0.997318587010477	-0.65958514084128	0.509520092361109	NA
ENSMUSG00000023977.15	1621.65335852199	0.590159955692377	0.247060972467945	2.38872190049745	0.0169070948655666	0.15543270239887
ENSMUSG00000028890.13	530.904281355241	0.309442247252622	0.22355641420754	1.38417968614109	0.166303441824205	0.467702132128527
ENSMUSG00000046634.12	1.81492736716768	0.0549248766357965	2.06919688122323	0.0265440553937656	0.97882339484243	NA
ENSMUSG00000032407.14	794.74231145115	0.536231039198583	0.376302272721118	1.4250007987488	0.154156970213987	0.451651534966031
ENSMUSG00000061414.8	22.6327594048748	-0.338404113185608	0.650060970389489	-0.520572882544926	0.602664344028782	NA
ENSMUSG00000037475.15	485.058862243707	0.845808320701725	0.41404786275299	2.0427791006527	0.0410743103306559	0.243217767694003
ENSMUSG00000026478.14	4222.51132153501	1.15030477955523	0.246174744625319	4.67271645312767	2.97241993339908e-06	0.000532974710191344
ENSMUSG00000003418.11	3.55075460836266	0.0740339345288904	1.62046397563448	0.0456868746495292	0.963559825398372	NA
ENSMUSG00000034156.16	5.44500392963071	-1.75078137626154	1.38152168349068	-1.26728476084273	0.205053487517387	NA
ENSMUSG00000027778.15	283.446477850398	0.524853837368725	0.260366782142357	2.01582488000239	0.0438182909405891	0.250386945417442
ENSMUSG00000057110.15	171.141489994944	0.432646399643315	0.3877035733817	1.11592058816896	0.264456128207931	0.57305929941029
ENSMUSG00000045672.15	104.904724364127	-0.0818274854794846	0.513739011301184	-0.159278317743934	0.873449602606441	0.950874302262723
ENSMUSG00000025907.14	1470.77137177993	0.990650444476874	0.380657607472516	2.60247115788537	0.0092554599909729	0.114249755938246
ENSMUSG00000039068.16	1729.41370902537	0.0804679944589726	0.27315714496431	0.29458498868659	0.768310930856182	0.903355555476408
ENSMUSG00000046111.17	192.997945660208	0.200875241969844	0.474026627495836	0.423763624906511	0.671738208688579	0.857475597529571
ENSMUSG00000053965.10	428.66768683243	0.585815116313359	0.316909700169464	1.84852377822484	0.0645266077869734	0.30277523430538
ENSMUSG00000117238.1	0	NA	NA	NA	NA	NA
ENSMUSG00000040651.9	311.441663805577	0.622207083376249	0.314079632196218	1.98104881563136	0.047585799473499	0.259292476223507
ENSMUSG00000046650.4	0	NA	NA	NA	NA	NA
ENSMUSG00000038708.10	1395.40620165838	0.343682005702648	0.376612744064311	0.912560743414354	0.361473608690757	0.659594753022257
ENSMUSG00000019947.10	1841.94677736838	0.842590790198508	0.262506538556221	3.20978972498261	0.00132832105428209	0.0398390288868117
ENSMUSG00000071064.13	615.52014648298	0.0552551432827355	0.256824135183046	0.215147782911265	0.829652100714899	0.931408829107484
ENSMUSG00000056900.13	346.649057580024	-0.128447813074489	0.24074425636544	-0.533544662762422	0.593656602707689	0.817054217536867
ENSMUSG00000091407.2	0	NA	NA	NA	NA	NA
ENSMUSG00000074151.13	35.1067544523862	-0.351097572080985	0.592704846338563	-0.592364942264083	0.553606236893621	0.796330802625458
ENSMUSG00000089945.13	0	NA	NA	NA	NA	NA
ENSMUSG00000054142.5	0.225462540302707	-0.0443040953327121	4.56207316163209	-0.00971139518439074	0.992251549512983	NA
ENSMUSG00000048874.15	1064.56596764691	0.730025087738078	0.326588394041384	2.23530627865965	0.0253972481535462	0.190486443485159
ENSMUSG00000022883.11	705.676622784472	0.883063009001533	0.281337460187507	3.13880351522682	0.00169639153330745	0.0449277119806386
ENSMUSG00000030077.11	21.7585528983471	1.72674666943184	0.764921885927393	2.25741569328785	0.0239821120199934	NA
ENSMUSG00000058589.14	115.013413942118	0.0673443524043063	0.377849624364055	0.178230565976216	0.858541905835528	0.944894962736409
ENSMUSG00000029910.14	757.427355866157	-0.0458967243106461	0.270444064604692	-0.169708750597775	0.865239191923086	0.947381261438011
ENSMUSG00000050229.3	1582.2304672144	-0.0927801948131617	0.19071837333854	-0.486477486091336	0.626628664072783	0.834842706008597
ENSMUSG00000020160.18	424.77273987482	0.332137132204234	0.285148404436953	1.16478692160338	0.244105254082741	0.552647641825051
ENSMUSG00000095916.2	0	NA	NA	NA	NA	NA
ENSMUSG00000031441.15	5226.70568043892	0.473979998233901	0.211269318347709	2.24348713736947	0.0248654183946027	0.188864596584615
ENSMUSG00000041341.10	1345.46458679271	0.40928499678718	0.250967014109839	1.63083183755795	0.102925807549134	0.373655510847204
ENSMUSG00000029651.16	313.554574371117	-0.148104026502374	0.222433703231506	-0.665834468206596	0.505516910826321	0.766813741671603
ENSMUSG00000021182.16	72.8739566969373	0.356308866490646	0.377891872479096	0.942885762938328	0.345739337850662	0.646267218097882
ENSMUSG00000114982.1	0	NA	NA	NA	NA	NA
ENSMUSG00000051527.11	61.8167100489711	0.398246350721774	0.448761086298613	0.887435125016108	0.374844679620664	0.668661572155393
ENSMUSG00000024759.14	4292.11146010908	0.421026716810268	0.219336156770998	1.91954998668937	0.0549147665561502	0.278466734783978
ENSMUSG00000054199.17	487.170388811585	-0.0320486328747701	0.21049354132466	-0.152254708971517	0.878986045372411	0.952429646133928
ENSMUSG00000043460.7	0.476339403374507	-0.190590436131654	3.75575494864661	-0.0507462384361188	0.959527731145747	NA
ENSMUSG00000027678.17	792.355996880465	0.427350572959577	0.249978533208512	1.70954908597338	0.0873492874402561	0.346920619461478
ENSMUSG00000116851.1	0	NA	NA	NA	NA	NA
ENSMUSG00000069895.4	2238.55190884259	0.00675228283086885	0.174226869417194	0.0387556916648729	0.969085171201899	0.989015510535261
ENSMUSG00000001089.14	2942.93451182925	0.639784459771351	0.209533059800459	3.05338193591324	0.00226277741354829	0.0530576589460904
ENSMUSG00000079429.9	0.119844130619689	-0.0443040953327121	4.56207316163209	-0.00971139518439074	0.992251549512983	NA
ENSMUSG00000019866.14	39.0256471742745	0.846796454367431	0.563295491052383	1.50328995672483	0.132764288856687	0.422283386126947
ENSMUSG00000046138.15	296.409688525486	0.355477755447768	0.351446310629753	1.01147101191869	0.311791048539901	0.614841207424281
ENSMUSG00000074305.9	1674.42120858038	1.01088534800831	0.221604891443652	4.56165629478152	5.07516767329528e-06	0.000822299456270783
ENSMUSG00000040265.16	57.1358166212882	0.248169932506569	0.448052407667032	0.553885947848751	0.579656902634664	0.808885132990657
ENSMUSG00000028402.18	1139.0573642096	0.645999373602739	0.253724450545331	2.54606669642713	0.0108944370679057	0.124661897783777
ENSMUSG00000021990.15	446.13765639562	-0.203226480699004	0.308088582280536	-0.659636521401341	0.509487111569649	0.769652750627358
ENSMUSG00000024008.16	6.17632682682087	0.730398390565108	1.2034966589242	0.606896899255214	0.543919336031749	NA
ENSMUSG00000031256.11	1021.20955145562	-0.0431022334584328	0.237822051127072	-0.181237329567066	0.856181294990578	0.943746442556036
ENSMUSG00000052942.13	1306.26860819458	-0.20081169820197	0.195079135427392	-1.02938583238037	0.303298403955622	0.608951468557063
ENSMUSG00000024593.15	804.210955498057	1.57038790279379	0.392175526994769	4.00429857219198	6.22017644519571e-05	0.00492052546088188
ENSMUSG00000000631.20	1085.78098990429	0.400538582268679	0.259154406816084	1.54555960359545	0.12221096364238	0.405921632459087
ENSMUSG00000075592.10	1454.41697513433	0.595843301245191	0.241397387137503	2.46830882600146	0.0135753143448003	0.139572497942564
ENSMUSG00000079020.9	792.567037329603	-0.0330430061967978	0.276625126228746	-0.1194504875507	0.904918464304075	0.963755722496334
ENSMUSG00000058690.14	1438.54581873887	0.478542777645509	0.254923776572469	1.87719946754151	0.0604907604882827	0.292934730661298
ENSMUSG00000030761.15	435.179668646417	-0.498076161525629	0.36439617186105	-1.3668534413571	0.171671247980018	0.472553406332082
ENSMUSG00000074405.8	498.665534597576	-0.256933462724926	0.228446470878062	-1.1246987608842	0.260716706971084	0.569915194302201
ENSMUSG00000038119.15	1093.6651880921	0.578753057937754	0.231073517580704	2.50462737572522	0.0122580458696997	0.131700827940974
ENSMUSG00000054976.14	5.73652087960788	3.13567453442579	1.45046422593583	2.16184203536814	0.0306303541621457	NA
ENSMUSG00000048391.3	0	NA	NA	NA	NA	NA
ENSMUSG00000030249.15	53.6839211571517	1.52468571931648	0.502050867122252	3.03691482111356	0.0023901298612744	0.0547732225092905
ENSMUSG00000045180.13	284.324682349341	0.309258333167408	0.302234992336877	1.02323801349482	0.30619532370145	0.611249253381979
ENSMUSG00000026469.14	1391.22009851107	0.527564516787663	0.221565538114629	2.38107659375586	0.0172621223101925	0.156852041099641
ENSMUSG00000039579.15	339.772202823734	0.870744670625996	0.296197918041874	2.93973933504455	0.00328488466903609	0.0657367991505912
ENSMUSG00000005374.13	972.397133577239	-0.227070842868934	0.285058371708239	-0.796576650277592	0.425696942750501	0.710798669742828
ENSMUSG00000040111.16	182.235527447646	-0.030874754240191	0.278349783679928	-0.110920704992153	0.911679226705948	0.965835719262768
ENSMUSG00000028753.12	0	NA	NA	NA	NA	NA
ENSMUSG00000039046.15	402.093997118375	0.113930813092812	0.219623425701963	0.518755286366491	0.603931402454299	0.822454335325637
ENSMUSG00000020422.13	4224.14634125997	0.735017859177331	0.222292683306482	3.30653194808008	0.000944585783054402	0.0315874368730205
ENSMUSG00000007817.15	588.033133630237	0.83588132230254	0.466604668718315	1.79141225611515	0.0732271635947672	0.319721843199517
ENSMUSG00000063273.11	666.448573188265	0.866171638863789	0.343111613645079	2.52446027594908	0.0115876100203047	0.128998493007498
ENSMUSG00000006005.18	1577.72129339415	0.976535743454798	0.372905597903965	2.61872106223057	0.00882600845203763	0.11134349124109
ENSMUSG00000041459.15	2233.96438831573	0.289049261550985	0.235343144905682	1.22820344593775	0.2193706054553	0.527461233940442
ENSMUSG00000024477.4	446.677378948756	0.900849817456768	0.319837548272592	2.81658555201589	0.00485371141112069	0.0814993393138827
ENSMUSG00000026135.17	393.201338926259	0.543032997767201	0.284078914059495	1.91155686287041	0.0559330567509869	0.280771835456242
ENSMUSG00000063919.11	20.8493798817932	0.490749128658471	0.734341635557787	0.668284494431139	0.50395200904713	NA
ENSMUSG00000054752.16	68.5211935430912	0.164329813487106	0.417616123164761	0.3934948972798	0.693953992056046	0.866797147555359
ENSMUSG00000022237.17	33.1738776703668	-0.759831279269194	0.970386147813691	-0.783019503092781	0.433615659301103	0.715794108121634
ENSMUSG00000020275.9	85.7734000374741	0.487645018315043	0.373201896778686	1.30665203613427	0.191330915274609	0.495499053808772
ENSMUSG00000015133.17	2081.3030551689	0.73632689189311	0.253314368369476	2.9067711264571	0.0036518027998071	0.0689739382750083
ENSMUSG00000048249.14	409.65668190734	0.40384885247646	0.244058970671759	1.65471833043009	0.0979816470208167	0.365633226551512
ENSMUSG00000033854.10	19.5910808081621	-0.504204607073932	0.734049088399983	-0.686881320393645	0.492157519038688	NA
ENSMUSG00000027177.14	3234.92718164562	0.469306955009308	0.186564673127795	2.51551886614588	0.0118857315744164	0.129847482175283
ENSMUSG00000036959.15	143.742136880721	0.211422765324798	0.441398620815595	0.478983747013393	0.631950191172558	0.837369806965077
ENSMUSG00000030536.10	4513.45851287634	0.786915544544907	0.208013401190978	3.78300407588854	0.000154946876150568	0.00894302828529116
ENSMUSG00000061410.6	1833.42485132292	0.267364697820097	0.253156376221634	1.05612468392273	0.290911254437534	0.598283307795681
ENSMUSG00000010277.7	7076.17208784311	-0.124156024423999	0.225282714860535	-0.551112074891586	0.581556848452765	0.810191287474648
ENSMUSG00000020850.14	3593.53231592899	0.833397977436009	0.269315581833415	3.09450337690267	0.00197142690461014	0.049370109894222
ENSMUSG00000043733.14	9612.32361841994	0.222414266653357	0.190424838695767	1.1679897862941	0.242810884807316	0.551142940906545
ENSMUSG00000000902.13	2072.37292309899	-0.131741786881691	0.185217558493287	-0.71128130590527	0.476909933558077	0.7468930808388
ENSMUSG00000115275.1	6.90142997366532	0.8970616084656	1.13962363932617	0.787156020206818	0.431190538994672	NA
ENSMUSG00000041890.17	1125.90759777111	0.125519557295672	0.235785568013549	0.532346226078005	0.594486221579385	0.817191752988717
ENSMUSG00000056493.9	897.029772651612	0.346307776537883	0.291973886322011	1.18609160874047	0.235586123990854	0.542307804763609
ENSMUSG00000056537.11	3474.28278601344	0.723193513069863	0.363652727397882	1.98869266908755	0.0467351356561667	0.257157980484505
ENSMUSG00000042390.9	570.256672049033	0.511616729400095	0.305672988204079	1.67373876378805	0.0941819518886177	0.359652672027057
ENSMUSG00000040118.15	1271.83854479129	0.51416612346186	0.186576278752853	2.75579578979033	0.00585495387925239	0.0898789117544983
[truncated: 54,099 more rows]
